# Supplementary material
Source: PubMed Central journal article supplement (PMC8020599)

# Contents

|          |                                                    |            |
|----------|----------------------------------------------------|------------|
| <b>1</b> | <b>Model Inputs</b>                                | <b>6</b>   |
| 1.1      | Countries/Territories . . . . .                    | 6          |
| 1.2      | Cancer Incidence . . . . .                         | 7          |
| 1.3      | Hierarchical Models . . . . .                      | 8          |
| 1.4      | Stage Distribution . . . . .                       | 9          |
| 1.4.1    | Oesophagus . . . . .                               | 12         |
| 1.4.2    | Stomach . . . . .                                  | 15         |
| 1.4.3    | Colon . . . . .                                    | 18         |
| 1.4.4    | Rectum . . . . .                                   | 22         |
| 1.4.5    | Anus . . . . .                                     | 26         |
| 1.4.6    | Liver . . . . .                                    | 29         |
| 1.4.7    | Pancreas . . . . .                                 | 32         |
| 1.4.8    | Lung . . . . .                                     | 35         |
| 1.4.9    | Breast . . . . .                                   | 38         |
| 1.4.10   | Cervical . . . . .                                 | 43         |
| 1.4.11   | Prostate . . . . .                                 | 47         |
| 1.5      | Maximum Achievable Survival . . . . .              | 50         |
| 1.6      | Treatment Benefits . . . . .                       | 51         |
| 1.6.1    | Survey Participants . . . . .                      | 51         |
| 1.6.2    | Survey Responses . . . . .                         | 53         |
| 1.6.3    | Estimated Priors . . . . .                         | 63         |
| 1.6.4    | Expert Consensus . . . . .                         | 74         |
| 1.6.5    | Impact of Modern Modalities . . . . .              | 79         |
| 1.7      | Chemotherapy . . . . .                             | 82         |
| 1.8      | Radiotherapy . . . . .                             | 86         |
| 1.9      | Surgery . . . . .                                  | 90         |
| 1.10     | Targeted Therapy . . . . .                         | 94         |
| 1.11     | Imaging . . . . .                                  | 96         |
| 1.12     | Quality . . . . .                                  | 104        |
| <b>2</b> | <b>Model Calibration</b>                           | <b>105</b> |
| 2.1      | Survival Targets . . . . .                         | 105        |
| 2.2      | Scores . . . . .                                   | 106        |
| 2.3      | Summary Goodness-of-Fit Indicators . . . . .       | 108        |
| 2.4      | Calibration Target Comparisons . . . . .           | 109        |
| 2.4.1    | Oesophagus . . . . .                               | 109        |
| 2.4.2    | Stomach . . . . .                                  | 112        |
| 2.4.3    | Colon . . . . .                                    | 114        |
| 2.4.4    | Rectum-Anus . . . . .                              | 116        |
| 2.4.5    | Liver . . . . .                                    | 118        |
| 2.4.6    | Pancreas . . . . .                                 | 120        |
| 2.4.7    | Lung . . . . .                                     | 122        |
| 2.4.8    | Breast . . . . .                                   | 124        |
| 2.4.9    | Cervix . . . . .                                   | 126        |
| 2.4.10   | Prostate . . . . .                                 | 129        |
| 2.5      | Validation Checks . . . . .                        | 132        |
| 2.6      | Maximum Achievable Survival - Posteriors . . . . . | 135        |
| 2.7      | Treatment Effects - Posteriors . . . . .           | 136        |
| <b>3</b> | <b>Additional Results</b>                          | <b>139</b> |
| 3.1      | Policy Intervention Scenarios . . . . .            | 139        |

|          |                                                                                                               |            |
|----------|---------------------------------------------------------------------------------------------------------------|------------|
| 3.2      | Estimated 5-Year Net Survival by Country for Cancers Diagnosed in 2018, 11 Modeled Cancers Combined . . . . . | 139        |
| 3.3      | Cancer Deaths by Income Group . . . . .                                                                       | 140        |
| 3.4      | Estimated Absolute Survival Gains from Policy Package Interventions . . . . .                                 | 141        |
| <b>4</b> | <b>Country Profiles</b>                                                                                       | <b>142</b> |
|          | Afghanistan . . . . .                                                                                         | 143        |
|          | Albania . . . . .                                                                                             | 144        |
|          | Algeria . . . . .                                                                                             | 145        |
|          | Andorra . . . . .                                                                                             | 146        |
|          | Angola . . . . .                                                                                              | 147        |
|          | Antigua and Barbuda . . . . .                                                                                 | 148        |
|          | Argentina . . . . .                                                                                           | 149        |
|          | Armenia . . . . .                                                                                             | 150        |
|          | Australia . . . . .                                                                                           | 151        |
|          | Austria . . . . .                                                                                             | 152        |
|          | Azerbaijan . . . . .                                                                                          | 153        |
|          | Bahamas . . . . .                                                                                             | 154        |
|          | Bahrain . . . . .                                                                                             | 155        |
|          | Bangladesh . . . . .                                                                                          | 156        |
|          | Barbados . . . . .                                                                                            | 157        |
|          | Belarus . . . . .                                                                                             | 158        |
|          | Belgium . . . . .                                                                                             | 159        |
|          | Belize . . . . .                                                                                              | 160        |
|          | Benin . . . . .                                                                                               | 161        |
|          | Bermuda . . . . .                                                                                             | 162        |
|          | Bhutan . . . . .                                                                                              | 163        |
|          | Bolivia (Plurinational State of) . . . . .                                                                    | 164        |
|          | Bosnia and Herzegovina . . . . .                                                                              | 165        |
|          | Botswana . . . . .                                                                                            | 166        |
|          | Brazil . . . . .                                                                                              | 167        |
|          | Brunei Darussalam . . . . .                                                                                   | 168        |
|          | Bulgaria . . . . .                                                                                            | 169        |
|          | Burkina Faso . . . . .                                                                                        | 170        |
|          | Burundi . . . . .                                                                                             | 171        |
|          | Cabo Verde . . . . .                                                                                          | 172        |
|          | Cambodia . . . . .                                                                                            | 173        |
|          | Cameroon . . . . .                                                                                            | 174        |
|          | Canada . . . . .                                                                                              | 175        |
|          | Cayman Islands . . . . .                                                                                      | 176        |
|          | Central African Republic . . . . .                                                                            | 177        |
|          | Chad . . . . .                                                                                                | 178        |
|          | Chile . . . . .                                                                                               | 179        |
|          | China . . . . .                                                                                               | 180        |
|          | Colombia . . . . .                                                                                            | 181        |
|          | Comoros . . . . .                                                                                             | 182        |
|          | Congo . . . . .                                                                                               | 183        |
|          | Costa Rica . . . . .                                                                                          | 184        |
|          | Côte d’Ivoire . . . . .                                                                                       | 185        |
|          | Croatia . . . . .                                                                                             | 186        |
|          | Cuba . . . . .                                                                                                | 187        |
|          | Cyprus . . . . .                                                                                              | 188        |
|          | Czechia . . . . .                                                                                             | 189        |
|          | Dem. People’s Republic of Korea . . . . .                                                                     | 190        |

|                                            |     |
|--------------------------------------------|-----|
| Democratic Republic of the Congo . . . . . | 191 |
| Denmark . . . . .                          | 192 |
| Djibouti . . . . .                         | 193 |
| Dominica . . . . .                         | 194 |
| Dominican Republic . . . . .               | 195 |
| Ecuador . . . . .                          | 196 |
| Egypt . . . . .                            | 197 |
| El Salvador . . . . .                      | 198 |
| Equatorial Guinea . . . . .                | 199 |
| Eritrea . . . . .                          | 200 |
| Estonia . . . . .                          | 201 |
| Eswatini . . . . .                         | 202 |
| Ethiopia . . . . .                         | 203 |
| Faroe Islands . . . . .                    | 204 |
| Fiji . . . . .                             | 205 |
| Finland . . . . .                          | 206 |
| France . . . . .                           | 207 |
| Gabon . . . . .                            | 208 |
| Gambia . . . . .                           | 209 |
| Georgia . . . . .                          | 210 |
| Germany . . . . .                          | 211 |
| Ghana . . . . .                            | 212 |
| Greece . . . . .                           | 213 |
| Greenland . . . . .                        | 214 |
| Grenada . . . . .                          | 215 |
| Guatemala . . . . .                        | 216 |
| Guinea . . . . .                           | 217 |
| Guinea-Bissau . . . . .                    | 218 |
| Guyana . . . . .                           | 219 |
| Haiti . . . . .                            | 220 |
| Honduras . . . . .                         | 221 |
| Hungary . . . . .                          | 222 |
| Iceland . . . . .                          | 223 |
| India . . . . .                            | 224 |
| Indonesia . . . . .                        | 225 |
| Iran (Islamic Republic of) . . . . .       | 226 |
| Iraq . . . . .                             | 227 |
| Ireland . . . . .                          | 228 |
| Israel . . . . .                           | 229 |
| Italy . . . . .                            | 230 |
| Jamaica . . . . .                          | 231 |
| Japan . . . . .                            | 232 |
| Jordan . . . . .                           | 233 |
| Kazakhstan . . . . .                       | 234 |
| Kenya . . . . .                            | 235 |
| Kiribati . . . . .                         | 236 |
| Kuwait . . . . .                           | 237 |
| Kyrgyzstan . . . . .                       | 238 |
| Lao People’s Democratic Republic . . . . . | 239 |
| Latvia . . . . .                           | 240 |
| Lebanon . . . . .                          | 241 |
| Lesotho . . . . .                          | 242 |
| Liberia . . . . .                          | 243 |
| Libya . . . . .                            | 244 |

|                                            |     |
|--------------------------------------------|-----|
| Liechtenstein . . . . .                    | 245 |
| Lithuania . . . . .                        | 246 |
| Luxembourg . . . . .                       | 247 |
| Madagascar . . . . .                       | 248 |
| Malawi . . . . .                           | 249 |
| Malaysia . . . . .                         | 250 |
| Maldives . . . . .                         | 251 |
| Mali . . . . .                             | 252 |
| Malta . . . . .                            | 253 |
| Marshall Islands . . . . .                 | 254 |
| Mauritania . . . . .                       | 255 |
| Mauritius . . . . .                        | 256 |
| Mexico . . . . .                           | 257 |
| Micronesia (Fed. States of) . . . . .      | 258 |
| Monaco . . . . .                           | 259 |
| Mongolia . . . . .                         | 260 |
| Montenegro . . . . .                       | 261 |
| Morocco . . . . .                          | 262 |
| Mozambique . . . . .                       | 263 |
| Myanmar . . . . .                          | 264 |
| Namibia . . . . .                          | 265 |
| Nauru . . . . .                            | 266 |
| Nepal . . . . .                            | 267 |
| Netherlands . . . . .                      | 268 |
| New Zealand . . . . .                      | 269 |
| Nicaragua . . . . .                        | 270 |
| Niger . . . . .                            | 271 |
| Nigeria . . . . .                          | 272 |
| North Macedonia . . . . .                  | 273 |
| Norway . . . . .                           | 274 |
| Oman . . . . .                             | 275 |
| Pakistan . . . . .                         | 276 |
| Palau . . . . .                            | 277 |
| Panama . . . . .                           | 278 |
| Papua New Guinea . . . . .                 | 279 |
| Paraguay . . . . .                         | 280 |
| Peru . . . . .                             | 281 |
| Philippines . . . . .                      | 282 |
| Poland . . . . .                           | 283 |
| Portugal . . . . .                         | 284 |
| Puerto Rico . . . . .                      | 285 |
| Qatar . . . . .                            | 286 |
| Republic of Korea . . . . .                | 287 |
| Republic of Moldova . . . . .              | 288 |
| Romania . . . . .                          | 289 |
| Russian Federation . . . . .               | 290 |
| Rwanda . . . . .                           | 291 |
| Saint Kitts and Nevis . . . . .            | 292 |
| Saint Lucia . . . . .                      | 293 |
| Saint Vincent and the Grenadines . . . . . | 294 |
| Samoa . . . . .                            | 295 |
| San Marino . . . . .                       | 296 |
| Sao Tome and Principe . . . . .            | 297 |
| Saudi Arabia . . . . .                     | 298 |

|                                              |     |
|----------------------------------------------|-----|
| Senegal . . . . .                            | 299 |
| Serbia . . . . .                             | 300 |
| Seychelles . . . . .                         | 301 |
| Sierra Leone . . . . .                       | 302 |
| Singapore . . . . .                          | 303 |
| Slovakia . . . . .                           | 304 |
| Slovenia . . . . .                           | 305 |
| Solomon Islands . . . . .                    | 306 |
| Somalia . . . . .                            | 307 |
| South Africa . . . . .                       | 308 |
| South Sudan . . . . .                        | 309 |
| Spain . . . . .                              | 310 |
| Sri Lanka . . . . .                          | 311 |
| State of Palestine . . . . .                 | 312 |
| Sudan . . . . .                              | 313 |
| Suriname . . . . .                           | 314 |
| Sweden . . . . .                             | 315 |
| Switzerland . . . . .                        | 316 |
| Syrian Arab Republic . . . . .               | 317 |
| Taiwan . . . . .                             | 318 |
| Tajikistan . . . . .                         | 319 |
| Thailand . . . . .                           | 320 |
| Timor-Leste . . . . .                        | 321 |
| Togo . . . . .                               | 322 |
| Tonga . . . . .                              | 323 |
| Trinidad and Tobago . . . . .                | 324 |
| Tunisia . . . . .                            | 325 |
| Turkey . . . . .                             | 326 |
| Turkmenistan . . . . .                       | 327 |
| Tuvalu . . . . .                             | 328 |
| Uganda . . . . .                             | 329 |
| Ukraine . . . . .                            | 330 |
| United Arab Emirates . . . . .               | 331 |
| United Kingdom . . . . .                     | 332 |
| United Republic of Tanzania . . . . .        | 333 |
| United States of America . . . . .           | 334 |
| Uruguay . . . . .                            | 335 |
| Uzbekistan . . . . .                         | 336 |
| Vanuatu . . . . .                            | 337 |
| Venezuela (Bolivarian Republic of) . . . . . | 338 |
| Viet Nam . . . . .                           | 339 |
| Yemen . . . . .                              | 340 |
| Zambia . . . . .                             | 341 |
| Zimbabwe . . . . .                           | 342 |

# 1 Model Inputs

## 1.1 Countries/Territories

We obtained a list of 235 countries/territories from the UN Population Projections 2019, grouped by geographic area and region. We excluded the following areas, mainly due to political affiliations with other countries. Our final dataset contained 200 countries/territories.

| Excluded Area                    | Political Status                               |
|----------------------------------|------------------------------------------------|
| American Samoa                   | United States Territory                        |
| Anguilla                         | British Overseas Territory                     |
| Aruba                            | Kingdom of the Netherlands                     |
| Bonaire, Sint Eustatius and Saba | Caribbean Netherlands (special municipalities) |
| British Virgin Islands           | British Overseas Territory                     |
| Channel Islands                  | British Crown dependency                       |
| Cook Islands                     | Free association with New Zealand              |
| Curaçao                          | Kingdom of the Netherlands                     |
| Falkland Islands (Malvinas)      | British Overseas Territory                     |
| French Guiana                    | French Overseas Department                     |
| French Polynesia                 | French Overseas Collectivity                   |
| Gibraltar                        | British Overseas Territory                     |
| Guadeloupe                       | French Overseas Department                     |
| Guam                             | United States Territory                        |
| Holy See                         | City-state                                     |
| Hong Kong                        | Chinese special administrative region          |
| Isle of Man                      | British Crown dependency                       |
| Macao                            | Chinese special administrative region          |
| Martinique                       | French Overseas Department                     |
| Mayotte                          | French Overseas Department                     |
| Montserrat                       | British Overseas Territory                     |
| New Caledonia                    | French Overseas Collectivity                   |
| Niue                             | Free association with New Zealand              |
| Northern Mariana Islands         | United States Commonwealth                     |
| Réunion                          | French Overseas Department                     |
| Saint-Barthélemy                 | French Overseas Collectivity                   |
| Saint Helena                     | British Overseas Territory                     |
| Saint Martin                     | French Overseas Collectivity                   |
| Saint Pierre and Miquelon        | French Overseas Collectivity                   |
| Sint Maarten                     | Kingdom of the Netherlands                     |
| Tokelau                          | Dependent territory of New Zealand             |
| Turks and Caicos Islands         | British Overseas Territory                     |
| United States Virgin Islands     | United States Territory                        |
| Wallis and Futuna Islands        | French Overseas Collectivity                   |
| Western Sahara                   | Disputed territory                             |

## 1.2 Cancer Incidence

Cancer incidence (number of cases and incidence rates) were obtained from GLOBOCAN 2018. Estimates were obtained for both sexes and all ages combined, and were available for 166-178 countries.

According to GLOBOCAN, these 11 diagnosis groups comprise an estimated 10.8 million cases out of 18.1 million registered cases, accounting for 60% of the registered global burden.

| Cancer                 | GLOBOCAN Codes | # Country Estimates | % of Diagnosed Global Cases |
|------------------------|----------------|---------------------|-----------------------------|
| Oesophagus             | C15            | 176                 | 3.2%                        |
| Stomach                | C16            | 177                 | 5.7%                        |
| Colon                  | C18            | 178                 | 6.1%                        |
| Rectum                 | C19-20         | 177                 | 3.9%                        |
| Anus                   | C21            | 166                 | 0.3%                        |
| Liver                  | C22            | 178                 | 4.7%                        |
| Pancreas               | C25            | 176                 | 2.5%                        |
| Lung                   | C33-34         | 178                 | 11.6%                       |
| Breast (females)       | C50            | 178                 | 11.6%                       |
| Cervix uteri (females) | C53            | 178                 | 3.2%                        |
| Prostate (males)       | C61            | 178                 | 7.1%                        |

Countries with missing data were matched to similar countries (i.e., similar region and income group) and estimated incidence rates imputed from the matched countries. Estimated number of cancers were then calculated based on the UN Medium Population estimates for 2018. Total population estimates were used for all cancers, except for breast and cervix where only females were used, and prostate where only males were used.

| Missing                     | Match       |
|-----------------------------|-------------|
| Andorra                     | Spain       |
| Antigua and Barbuda         | Bahamas     |
| Belize                      | Guatemala   |
| Bermuda                     | Bahamas     |
| Bhutan                      | Nepal       |
| Brunei Darussalam           | Malaysia    |
| Cabo Verde                  | Senegal     |
| Cayman Islands              | Bahamas     |
| Comoros                     | Madagascar  |
| Djibouti                    | Eritrea     |
| Dominica                    | Jamaica     |
| Faroe Islands               | Iceland     |
| Gambia                      | Senegal     |
| Greenland                   | Iceland     |
| Grenada                     | Jamaica     |
| Iceland                     | Norway      |
| Kiribati                    | Fiji        |
| Liechtenstein               | Switzerland |
| Maldives                    | Sri Lanka   |
| Marshall Islands            | Fiji        |
| Micronesia (Fed. States of) | Fiji        |
| Monaco                      | France      |
| Nauru                       | Fiji        |
| Palau                       | Fiji        |
| Saint Kitts and Nevis       | Bahamas     |

| Missing                          | Match             |
|----------------------------------|-------------------|
| Saint Vincent and the Grenadines | Jamaica           |
| Samoa                            | Fiji              |
| San Marino                       | Italy             |
| Sao Tome and Principe            | Equatorial Guinea |
| Seychelles                       | Comoros           |
| Taiwan                           | South Korea       |
| Timor-Leste                      | Indonesia         |
| Tonga                            | Samoa             |
| Tuvalu                           | Samoa             |
| Vanuatu                          | Papua New Guinea  |

The age distribution of incident cases was estimated based on GLOBOCAN data for the following age groups: 0-19, 20-39, 40-54, 55-69, 70+. For countries for which age group-specific estimates were not available we used the regional or area-level (as needed) average age distribution for each cancer. A specific age at diagnosis was assigned within the age group based on each country’s 2018 age structure as estimated by the UN Population projections. Note that this approach assumes a constant incidence rate within each age group, and so may result in underestimates of the age at diagnosis within the age group. We set uniform priors (i.e. Beta(1, 1)) and updated them based on the observed number of cases in each age group from GLOBOCAN. We sampled from these Beta distributions and re-normalized the age probabilities for each simulation.

#### References

Global Cancer Observatory. International Agency for Research on Cancer. <http://gco.iarc.fr/today/online-analysis-table>

United Nations, Department of Economic and Social Affairs, Population Division (2019). World Population Prospects 2019, Online Edition. <https://population.un.org/wpp/Download/Standard/CSV/>

### 1.3 Hierarchical Models

We use Bayesian hierarchical models to synthesize data from multiple sources and estimate parameters for countries for which no data are available. In contrast to no pooling (i.e. every country is different), or complete pooling (i.e. every country is the same), hierarchical models allow for partial pooling of information (i.e. countries in similar income groups and geographic regions likely have similar parameters), which allows for ‘borrowing’ of information from multiple sources. This approach also helps to provide estimates that are more robust to outliers by smoothing, or ‘regularizing’ the country-specific parameters by virtue of the hierarchical structure. For more information on Bayesian data analysis, see Gelman et al. 2014.

We use vertical density plots to display the probability distributions of the model priors (remainder of Section 1), and the calibrated posteriors for each country (Section 4). In these plots, the value of interest (i.e. parameter value) is plotted on the y-axis, with the probability density plotted symmetrically around the origin for visual balance - wider curves correspond to higher probability density.

Reference:

Gelman A, Carlin JB, Stern HS, Rubin DB. Bayesian data analysis, 3rd edn. Boca Raton, Florida: CRC Press, 2014.



## 1.4 Stage Distribution

Due to the paucity of data available, we undertook a global literature review to gather data on stage at diagnosis. For each country, we performed a search in PubMed using the terms: “cancer” AND “stage” AND [country name]. For countries which returned more than 500 results, the searched was refined to: “cancer” AND “stage” AND “registry” AND [country name].

National estimates were available for the US, Canada, Czechia, and England, so a search was not performed for these countries. Data were also available for Australia from the Victoria cancer registry. Data were extracted if Roman numeral stage estimates (I-IV) were available. Other stage estimates (e.g. Local/Regional/Distant) were not extracted. If recent data from a nationally-representative registry were found for a cancer, then data from older studies from the same country/cancer were not extracted. For all estimates we excluded data where stage was not reported (e.g. Unknown). The search was performed in October 2019.

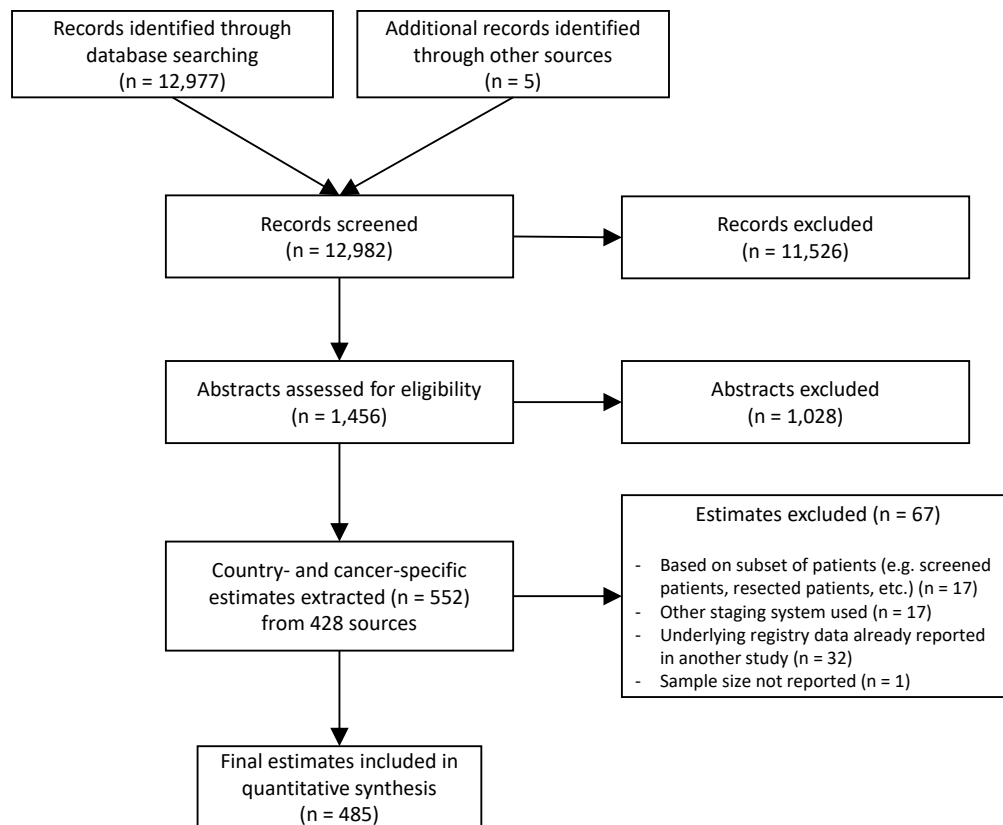

Note: Some sources contained estimates for multiple countries and/or cancers and so may appear multiple times in the following table counts.

| Cancer     | # sources | # countries |
|------------|-----------|-------------|
| Oesophagus | 15        | 15          |
| Stomach    | 43        | 37          |
| Colorectal | 59        | 47          |
| Colon      | 26        | 22          |
| Rectum     | 30        | 22          |

| Cancer   | # sources | # countries |
|----------|-----------|-------------|
| Anus     | 4         | 4           |
| Liver    | 6         | 6           |
| Pancreas | 18        | 17          |
| Lung     | 52        | 37          |
| Breast   | 179       | 84          |
| Cervix   | 86        | 55          |
| Prostate | 17        | 16          |

We used ‘colorectal’ data for ‘colon’ and ‘rectum’ if data were not available for these specific cancers in the same country. After removing estimates that were likely duplicates (e.g. based on the same hospital registry data), or raised concerns of bias (e.g. stage distribution reported among surgically resected cases only, or among certain age groups, or only among screened patients, etc.), we had the following data:

| Cancer     | # sources | # countries |
|------------|-----------|-------------|
| Oesophagus | 11        | 11          |
| Stomach    | 37        | 35          |
| Colon      | 73        | 63          |
| Rectum     | 74        | 61          |
| Anus       | 3         | 3           |
| Liver      | 6         | 6           |
| Pancreas   | 18        | 17          |
| Lung       | 45        | 37          |
| Breast     | 162       | 84          |
| Cervix     | 83        | 55          |
| Prostate   | 17        | 16          |

We used a hierarchical modelling approach to regularize the stage distribution estimates, and to make estimates for countries with no data.

### Stage at Diagnosis

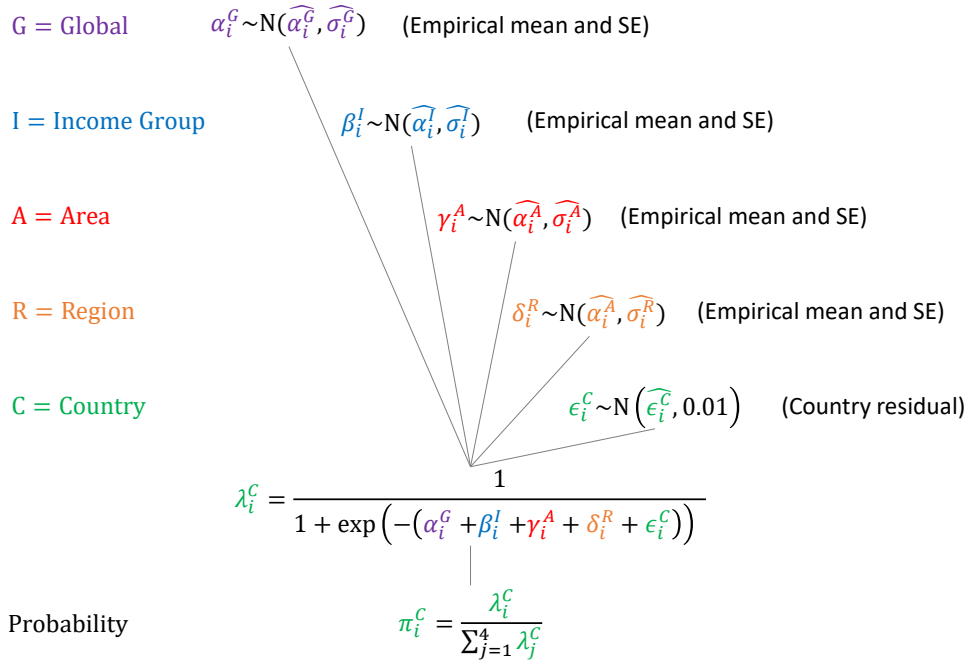

We weighted the estimates by the total number of cases for which stage was reported. To guard against over-fitting to individual country data we reduced the magnitude of the country-level residuals by 75%.

When drawing stage in the model, we used raking to estimate joint probabilities of stage and age. Initial joint probabilities of age and stage were estimated from SEER 2010-16 data using AJCC stage groups, 7 edition. Raking was then performed until convergence was achieved with the target marginal distributions: 1) estimated stage distribution and 2) age distribution from GLOBOCAN. Uniform priors were put on age distribution by stage (i.e. Beta(1, 1)) to avoid initial weights of 0 for raking.

### 1.4.1 Oesophagus

Stage Data Available – Oesophagus

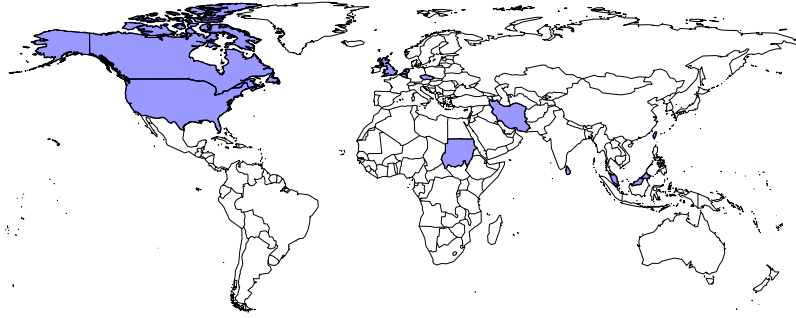

Stage at Diagnosis, Oesophagus

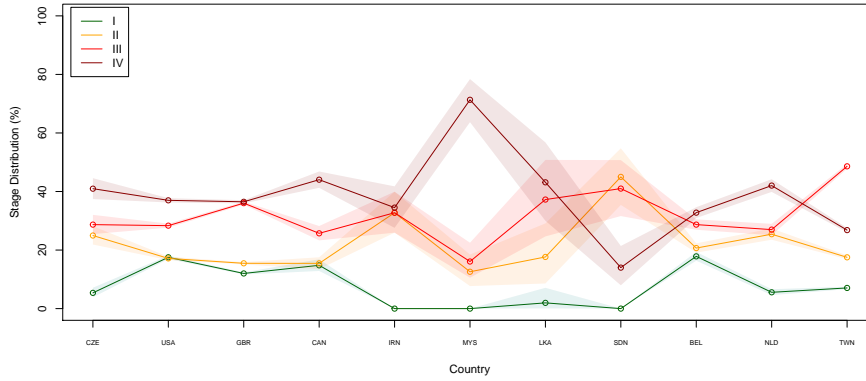

Global: Oesophagus

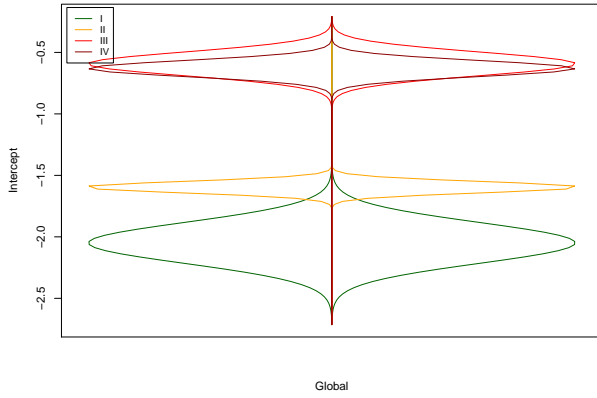

Income Group: Oesophagus

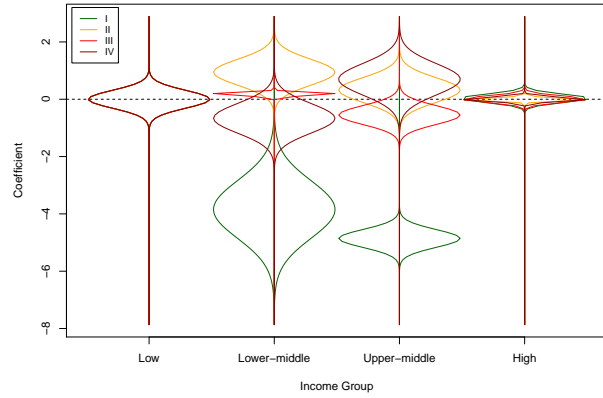

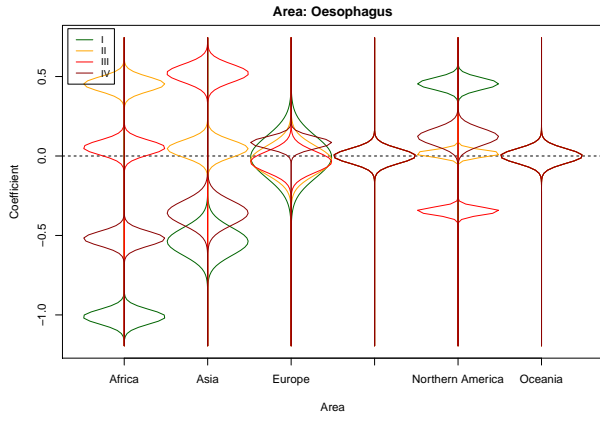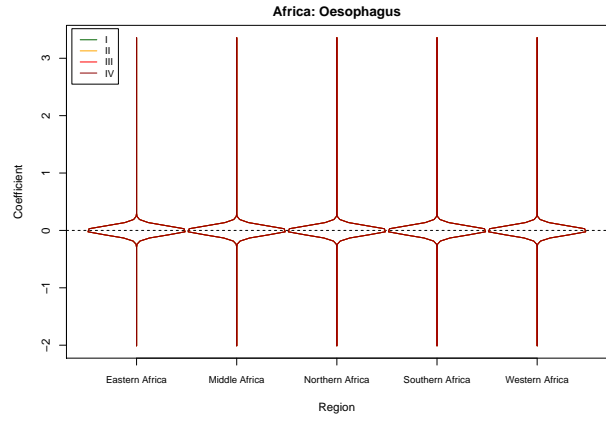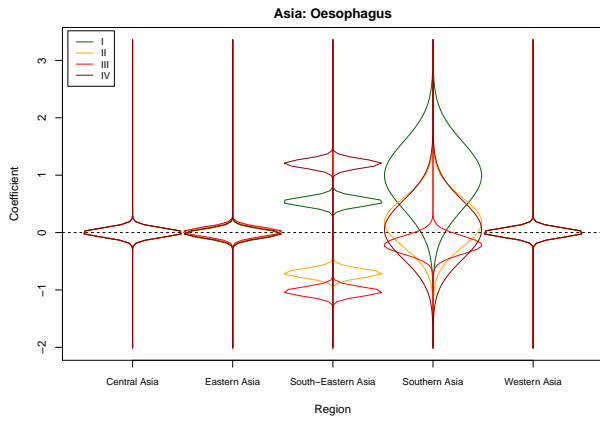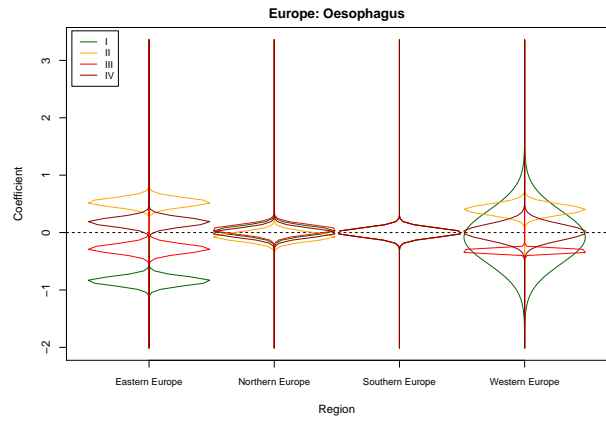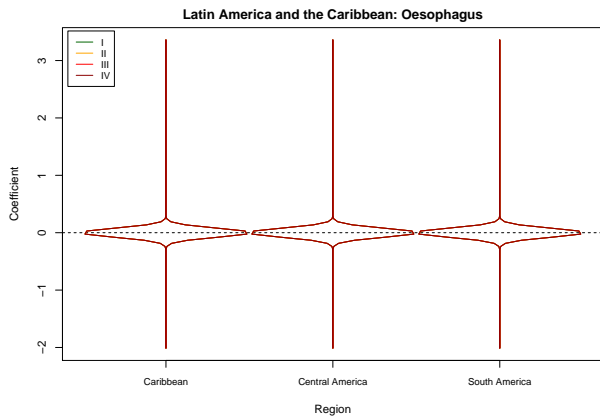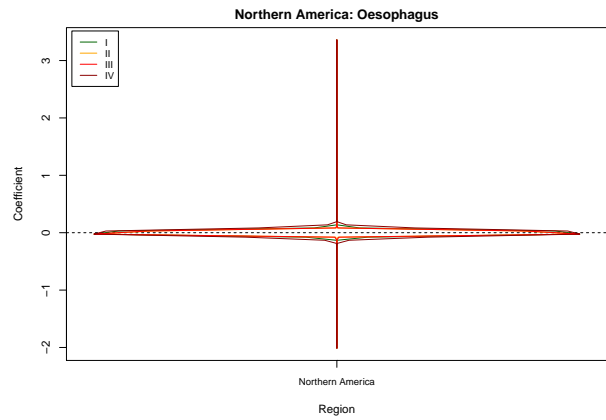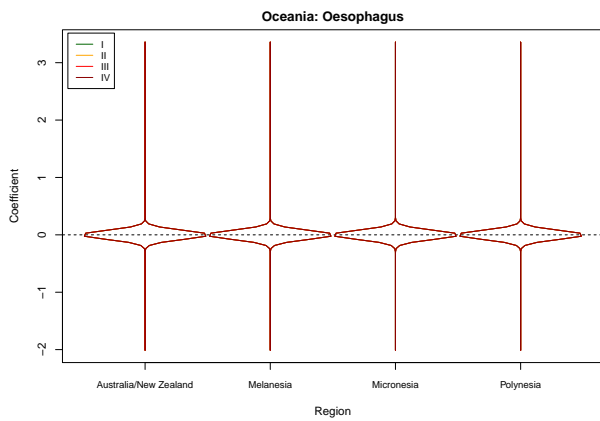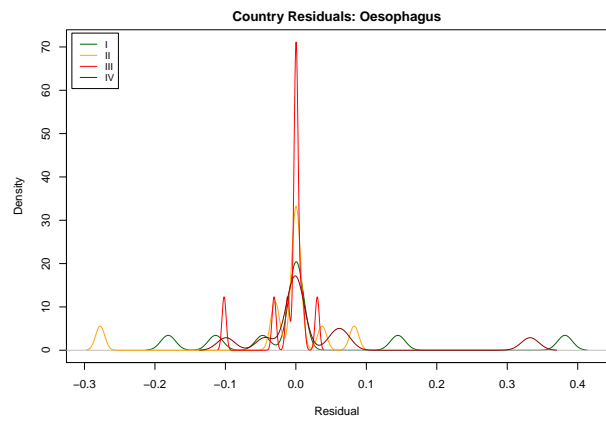

## References

| Country | Cases | Years     | Source                                                                               | Reference                       |
|---------|-------|-----------|--------------------------------------------------------------------------------------|---------------------------------|
| BEL     | 2471  | 2008-2011 | Belgian Cancer Registry                                                              | Silversmit 2017                 |
| CAN     | 1207  | 2011-2015 | Canadian Cancer Registry                                                             | Canadian Cancer Statistics 2018 |
| CZE     | 725   | 2015      | Modelled estimates based on data from Czech National Cancer Registry                 | Dusek 2015                      |
| GBR     | 30401 | 2013-2017 | England ONS                                                                          | ONS 2019                        |
| IRN     | 171   | 2006-2011 | Imam Reza (AS) Radiation Therapy Center Hospital, Tabriz University, East Azerbaijan | Mirinezhad 2012                 |
| LKA     | 51    | 2015-2016 | National Cancer Institute, Maharagama                                                | Talagala 2018                   |
| MYS     | 143   | 1998-2003 | University of Malaya Medical Centre, Kuala Lumpur                                    | Abdullah 2010                   |
| NLD     | 1975  | 1999-2003 | Netherlands Cancer Registry                                                          | Crane 2007                      |
| SDN     | 100   | 2003-2007 | Shaab Hospital, Khartoum                                                             | Ahmed 2016                      |
| TWN     | 13653 | 2008-2014 | Taiwan Society of Cancer Registry                                                    | Cheng 2018                      |
| USA     | 16076 | 2010-2016 | SEER                                                                                 | SEER 2019                       |



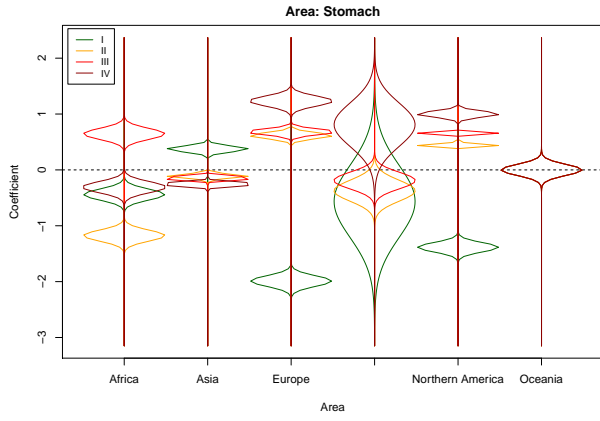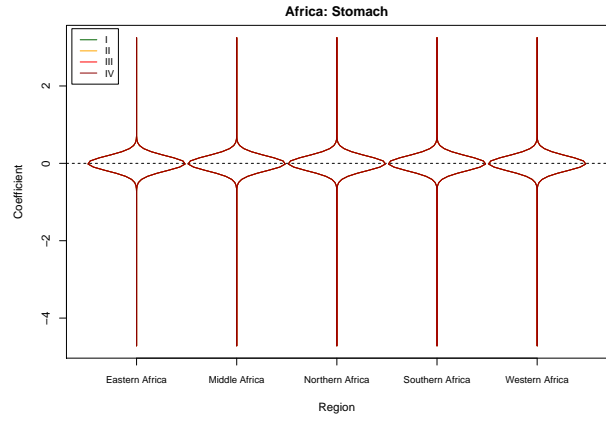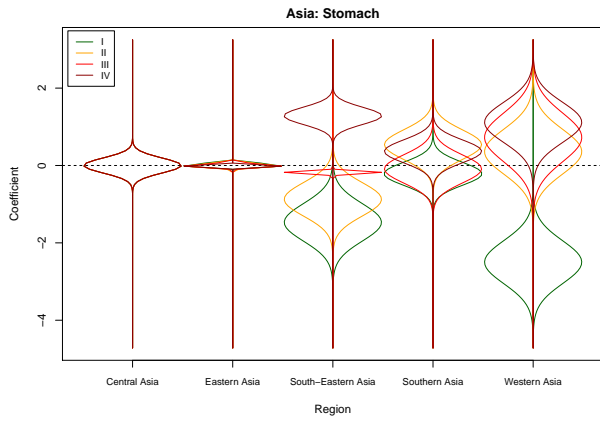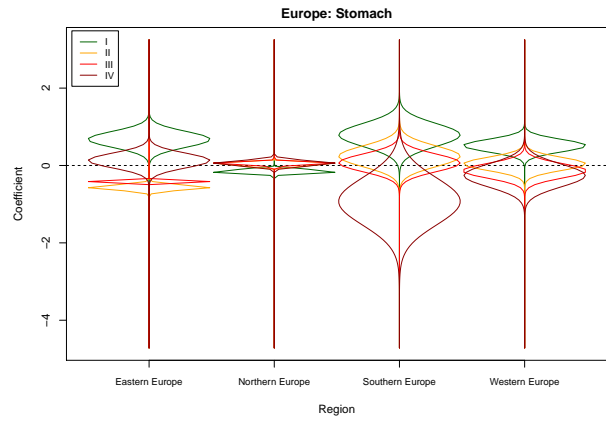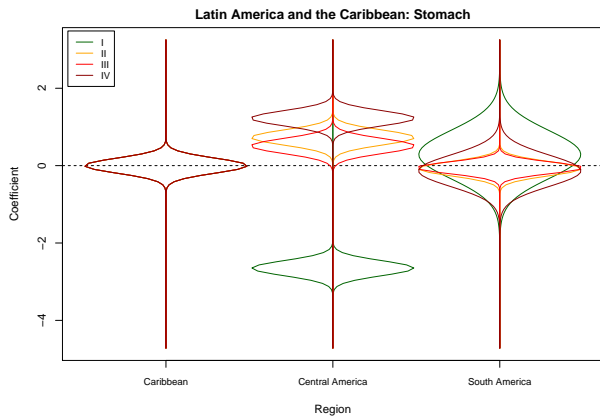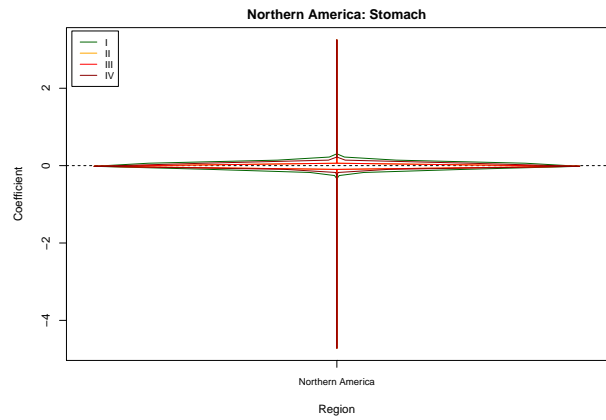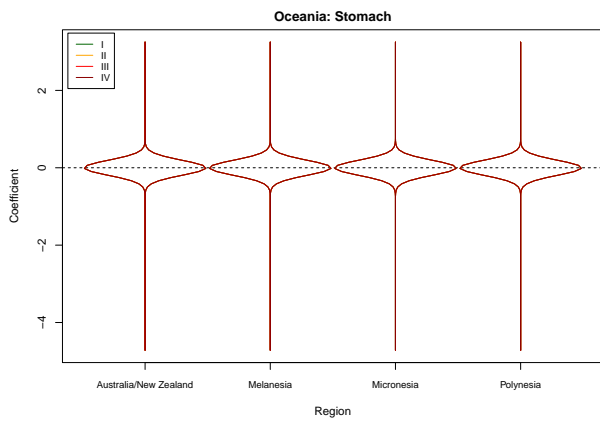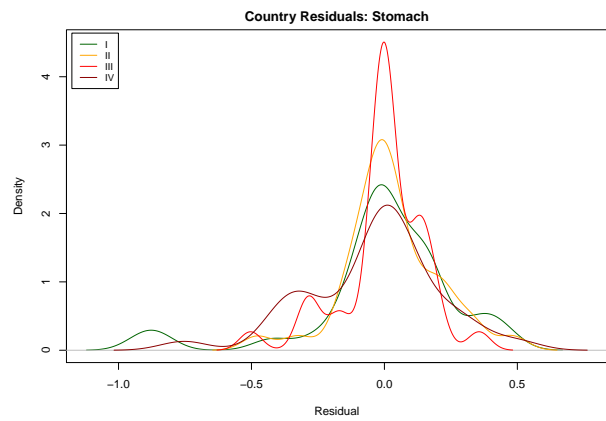



## References

| Country | Cases  | Years        | Source                                                                           | Reference                       |
|---------|--------|--------------|----------------------------------------------------------------------------------|---------------------------------|
| ALB     | 62     | 2013-2014    | Tirana                                                                           | Malaj 2017                      |
| BEL     | 2510   | 2008-2011    | Belgian Cancer Registry                                                          | Silversmit 2017                 |
| BRA     | 2140   | 2008-2014    | Instituto do Câncer do Estado de São Paulo (ICESP)                               | Cormedi 2018                    |
| BRN     | 84     | 2008-2012    | Four main hospitals in Brunei Darussalam                                         | Yen 2014                        |
| BTN     | 354    | 2008-2013    | National Referral Hospital, Thimphu                                              | Dendup 2015                     |
| CAN     | 1849   | 2011-2015    | Canadian Cancer Registry                                                         | Canadian Cancer Statistics 2018 |
| CHL     | 379    | 1998-2002    | Population-based cancer registry of Valdivia                                     | Heise 2009                      |
| CHN     | 4543   | 2002-2003    | Shanghai Cancer Registry                                                         | Zheng 2014                      |
| COL     | 172    | 2010-2011    | Gastroenterology outpatient service of the National Oncology Institute of Bogota | Sanchez 2012                    |
| CZE     | 1531   | 2015         | Modelled estimates based on data from Czech National Cancer Registry             | Dusek 2015                      |
| DEU     | 255    | Not reported | German Cancer Research Center                                                    | Meistere 2017                   |
| FRA     | 640    | 2004-2007    | Population-based cancer registries: Cote-d'Or and Saone-et-Loire, Burgundy       | Herbreteau 2015                 |
| GBR     | 20318  | 2013-2017    | England ONS                                                                      | ONS 2019                        |
| ISL     | 460    | 1990-2009    | Iceland Cancer Registry                                                          | Olafsdottir 2016                |
| ITA     | 527    | 2010-2015    | Cremona, pathological and Hospital Discharge Records and patient clinical charts | Donida 2019                     |
| JOR     | 168    | 1991-2001    | King Abdullah University Hospital, Irbid                                         | Bani-Hani 2005                  |
| JPN     | 251888 | 2012-2015    | Nationwide hospital-based cancer registries                                      | Okuyama 2018                    |
| LKA     | 83     | 2000-2006    | University Surgical Unit, Colombo South Teaching Hospital                        | Siriwardana 2007                |
| LTU     | 178    | Not reported | Lithuanian University of Health Sciences                                         | Meistere 2017                   |
| LVA     | 178    | Not reported | Oncology Centre of Latvia, Riga East University Hospital                         | Meistere 2017                   |
| MYS     | 250    | 1988-1998    | Ipoh Hospital                                                                    | Lim 2019                        |
| MYS     | 182    | 2004-2008    | Penang Cancer Registry                                                           | Lim 2019                        |
| NOR     | 736    | 2001-2011    | Cancer Registry of Norway and the Norwegian Patient Register                     | Bringeland 2017                 |
| NPL     | 152    | 2012-2014    | Tertiary care general hospital                                                   | Kandel 2016                     |
| OMN     | 115    | 1995-2005    | Sultan Qaboos University, Royal Hospital, and Armed Forces Hospital, Muscat      | Al-Moundhri 2012                |
| OMN     | 339    | 1993-2004    | Sultan Qaboos University Hospital, Royal Hospital, and Sohar Hospital            | Al-Moundhri 2006                |
| PAK     | 15     | 2006-2010    | Dow University of Health Sciences and Civil Hospital, Karachi                    | Afridi 2011                     |
| PAN     | 323    | 2012-2015    | National Oncology Institute (NOI)                                                | Castro 2017                     |
| PER     | 60     | 2005-2008    | Santa Rosa Hospital                                                              | Pilco 2009                      |
| ROU     | 60     | 1998-2002    | Emergency County Hospital in Timișoara                                           | Lazar 2010                      |
| SRB     | 12     | 2002-2004    | Institute for Digestive Diseases, Clinical Center of Serbia                      | Dragutinovic 2006               |
| THA     | 329    | 2000-2012    | Khon Kaen population-based cancer registry                                       | Nanthanangkul 2016              |
| TUR     | 166    | 2004-2008    | Ten centers from Turkey took part in the REGATE registry                         | Yalcin 2014                     |
| TWN     | 268    | Not reported | Taichung Veterans General Hospital                                               | Meistere 2017                   |
| TZA     | 220    | 2007-2011    | Bugando Medical Centre, Mwanza                                                   | Mabula 2012                     |
| USA     | 27428  | 2010-2016    | SEER                                                                             | SEER 2019                       |
| VEN     | 237    | 1991-1997    | Two main hospitals in San Cristobal, Tachira                                     | Plummer 2000                    |

### 1.4.3 Colon

Stage Data Available – Colon

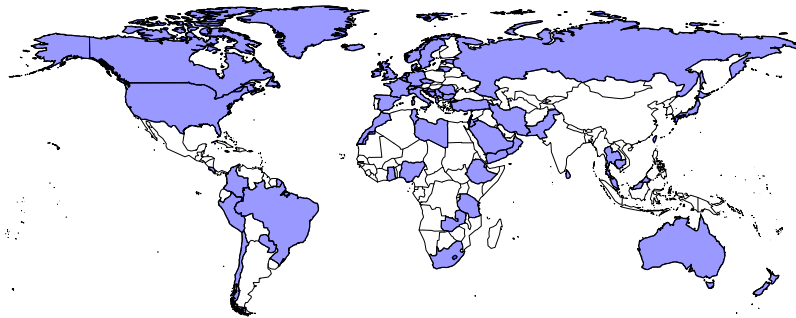

Stage at Diagnosis, Colon

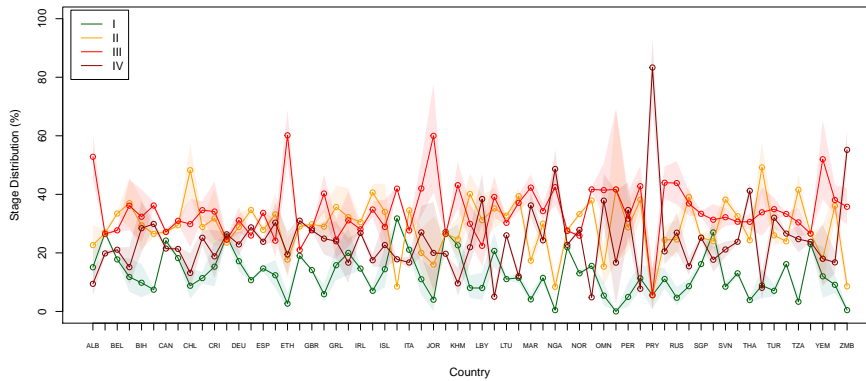

Global: Colon

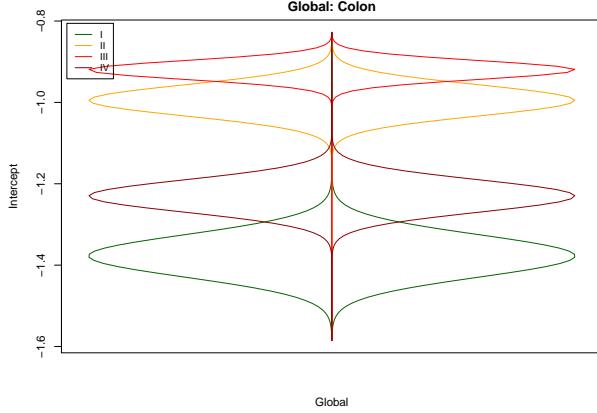

Income Group: Colon

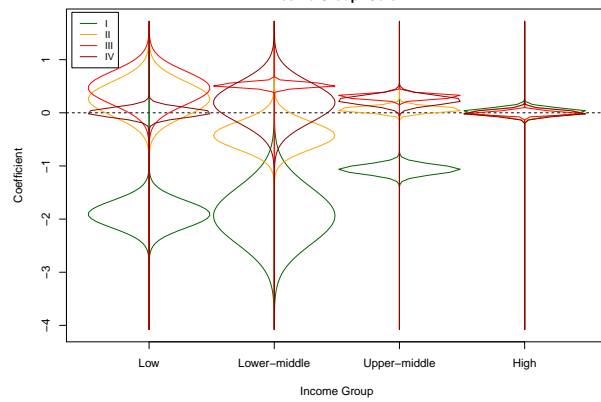

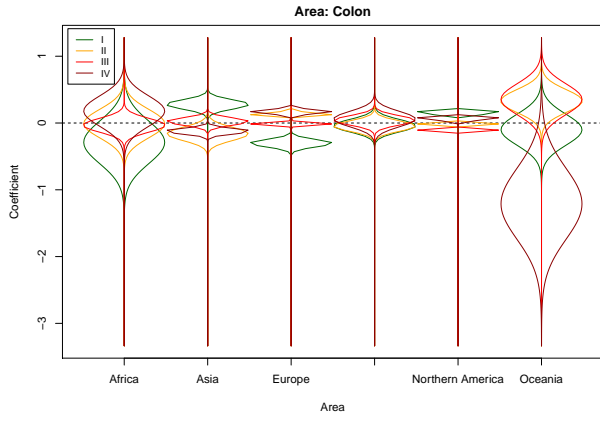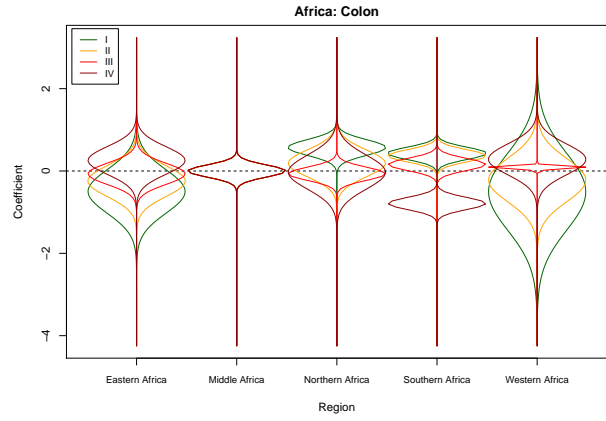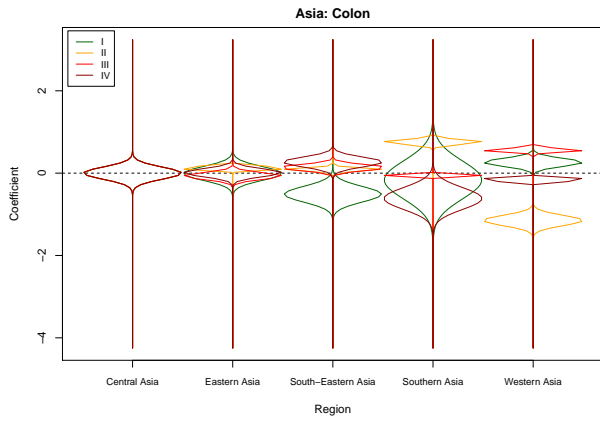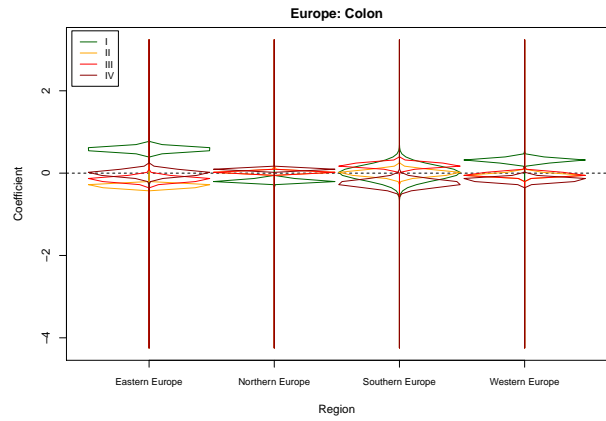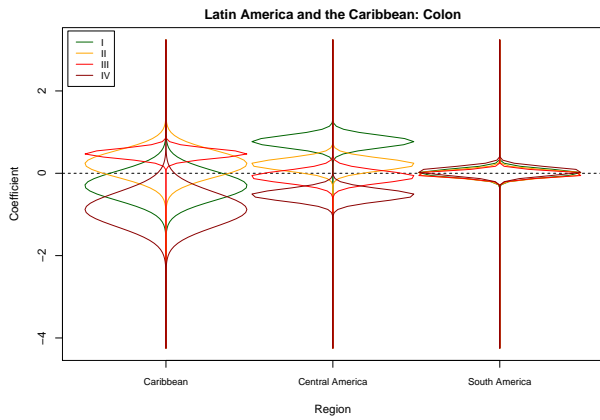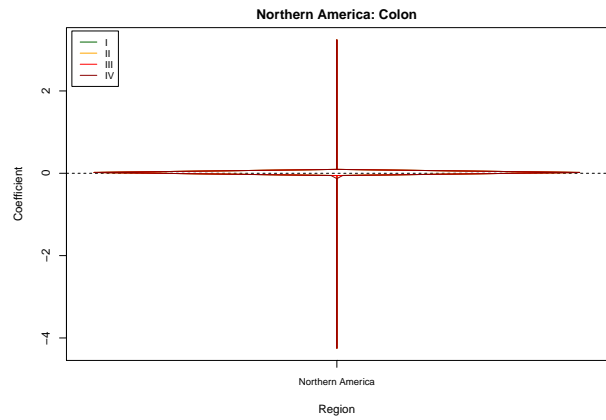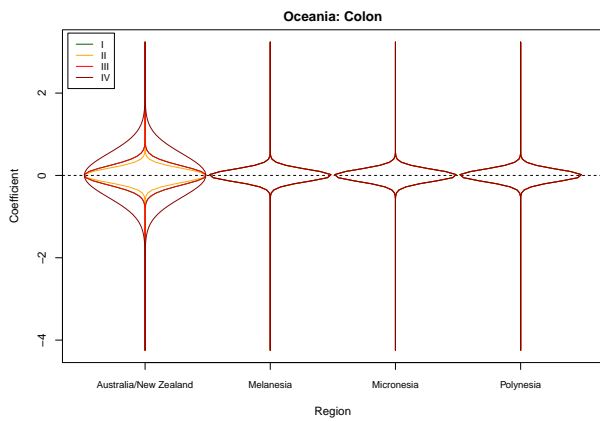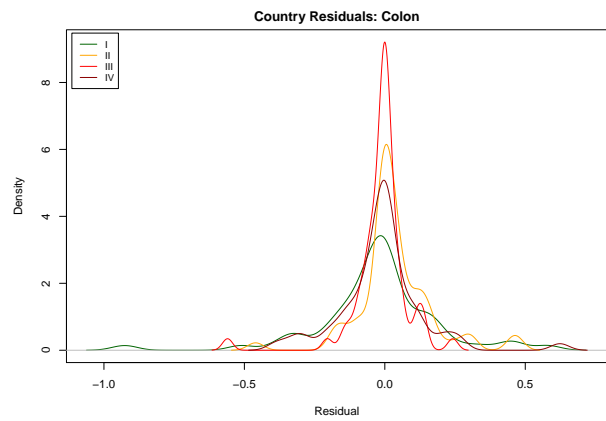

## References

| Country | Cases  | Years        | Source                                                                                                                                                                                                                        | Reference                       |
|---------|--------|--------------|-------------------------------------------------------------------------------------------------------------------------------------------------------------------------------------------------------------------------------|---------------------------------|
| ALB     | 159    | 2012-2013    | Tirana University Hospital [Colorectal]                                                                                                                                                                                       | Martinetti 2014                 |
| AUS     | 3353   | 2017         | Victoria Cancer Registry [Colorectal]                                                                                                                                                                                         | Victoria Cancer Registry 2019   |
| AUS     | 4217   | 2011         | New South Wales Cancer Registry [Colorectal]                                                                                                                                                                                  | Lawrance 2019                   |
| BEL     | 12893  | 2008-2011    | Belgian Cancer Registry                                                                                                                                                                                                       | Silversmit 2017                 |
| BGR     | 119    | Not reported | University hospital in Stara Zagora and an Oncology centre in Pleven [Colorectal]                                                                                                                                             | Stanilov 2014                   |
| BIH     | 102    | 2014-2015    | Sarajevo Clinical Center, University of Sarajevo [Colorectal]                                                                                                                                                                 | Raši? 2018                      |
| BRA     | 5100   | 2008-2014    | Instituto do Câncer do Estado de São Paulo (ICESP) [Colorectal]                                                                                                                                                               | Cormedi 2018                    |
| CAN     | 7800   | 2011-2015    | Canadian Cancer Registry                                                                                                                                                                                                      | Canadian Cancer Statistics 2018 |
| CHE     | 9147   | 2000-2008    | SNC?NICER Cancer Epidemiology Study [Colorectal]                                                                                                                                                                              | Feller 2018                     |
| CHL     | 53     | 2008-2013    | Clinica Las Condes [Colorectal]                                                                                                                                                                                               | Alvarez 2017                    |
| CHL     | 61     | 2012-2014    | Clinica Las Condes [Colorectal]                                                                                                                                                                                               | Gonzalez-Quiroz 2016            |
| COL     | 777    | 2011-2015    | Instituto de Cancerología (IDC) Las Américas, de Medellín                                                                                                                                                                     | Campo-Sanchez 2019              |
| COL     | 145    | 2010-2011    | National Oncology Institute of Bogota [Colorectal]                                                                                                                                                                            | Sanchez 2012                    |
| CRI     | 85     | 2010         | Hospital San Juan de Dios, San Jose                                                                                                                                                                                           | Ramos-Esquivel 2014             |
| CZE     | 8333   | 2015         | Modelled estimates based on data from Czech National Cancer Registry [Colorectal]                                                                                                                                             | Dusek 2015                      |
| DEU     | 402    | 1999-2000    | Cancer Registry of Rostock                                                                                                                                                                                                    | Fietkau 2004                    |
| DNK     | 7854   | 2010-2012    | Population-based national cancer registry                                                                                                                                                                                     | Benitez Majano 2019             |
| ESP     | 2462   | 2000-2014    | Hospital del Mar Tumour Registry [Colorectal]                                                                                                                                                                                 | Parés-Badell 2017               |
| ESP     | 2447   | 2006-2011    | Mallorca Cancer Registry [Colorectal]                                                                                                                                                                                         | Ramos 2016                      |
| EST     | 178    | 2010-2014    | Estonian Cancer Registry                                                                                                                                                                                                      | Innos 2018                      |
| ETH     | 113    | 2016-2017    | Tikur Anbessa Hospital [Colorectal]                                                                                                                                                                                           | Deressa 2019                    |
| FRA     | 6325   | 2000-2008    | Population-based digestive cancer registry of Burgundy [Colorectal]                                                                                                                                                           | Drouillard 2015                 |
| GBR     | 98396  | 2013-2017    | England ONS                                                                                                                                                                                                                   | ONS 2019                        |
| GBR     | 58144  | 2010-2012    | Population-based national cancer registry                                                                                                                                                                                     | Benitez Majano 2019             |
| GBR     | 1229   | 1999-2006    | Hospitals in Scotland [Colorectal]                                                                                                                                                                                            | Theodoratou 2016                |
| GHA     | 221    | 2009-2015    | Komfo Anokye Teaching Hospital (KATH), Kumasi [Colorectal]                                                                                                                                                                    | Agemang-Yeboah 2018             |
| GRL     | 171    | 2004-2012    | The Danish Pathology Data Bank [Colorectal]                                                                                                                                                                                   | Odgaard 2018                    |
| HRV     | 90     | 2009-2010    | Not reported [Colorectal]                                                                                                                                                                                                     | Kust 2017                       |
| IRL     | 12504  | 1994-2002    | National Cancer Registry (Ireland) [Colorectal]                                                                                                                                                                               | Carsin 2008                     |
| IRN     | 603    | 2002-2007    | Cancer registry of the Research Center of Gastroenterology and Liver Disease (RCGLD), Shahid Beheshti Medical University, Tehran                                                                                              | Asghari-Jafarabadi 2009         |
| IRN     | 546    | 2001-2008    | Academic training and private hospitals of Urmia, West-Azerbaijan [Colorectal]                                                                                                                                                | Mahmodlou 2012                  |
| ISL     | 97     | 1997-2004    | Icelandic Cancer Registry                                                                                                                                                                                                     | Snaebjornsson 2017              |
| ISR     | 29271  | 1970-1996    | Israel National Cancer Registry [Colorectal]                                                                                                                                                                                  | Barchana 2004                   |
| ITA     | 1358   | 2004-2009    | Tumor Registry of Parma [Colorectal]                                                                                                                                                                                          | Negri 2019                      |
| JAM     | 100    | 2008-2012    | University of the West Indies, Kingston [Colorectal]                                                                                                                                                                          | Plummer 2016                    |
| JOR     | 25     | 2008-2015    | King Abdullah University Hospital (KAUH) [Colorectal]                                                                                                                                                                         | Al-Husein 2018                  |
| JPN     | 225172 | 2012-2015    | Nationwide hospital-based cancer registries [Colorectal]                                                                                                                                                                      | Okuyama 2018                    |
| KHM     | 146    | 2005-2010    | Khmer-Soviet Friendship Hospital, Phnom Penh [Colorectal]                                                                                                                                                                     | Hav 2011                        |
| LBN     | 187    | 2005-2012    | Hotel-Dieu de France Hospital, Beirut [Colorectal]                                                                                                                                                                            | Nehmeh 2018                     |
| LBY     | 125    | 2012         | Benghazi Medical Center [Colorectal]                                                                                                                                                                                          | Bodalal 2014                    |
| LKA     | 179    | 2010-2014    | University Surgical Unit at the North Colombo Teaching Hospital [Colorectal]                                                                                                                                                  | Chandrasinghe 2017              |
| LTU     | 13689  | 2000-2012    | Lithuanian Cancer Registry and the National Health Insurance Fund database [Colorectal]                                                                                                                                       | Dulskas 2019                    |
| LUX     | 1148   | 1988-1998    | National Morphologic Tumour Registry (MTR)                                                                                                                                                                                    | Scheiden 2005                   |
| MAR     | 461    | 2009-2011    | 10 cancer centers [Colorectal]                                                                                                                                                                                                | Mrabti 2016                     |
| MYS     | 1214   | 2008-2009    | Malaysia National Cancer Patient Registry [Colorectal]                                                                                                                                                                        | Hassan 2016                     |
| NGA     | 66     | 2014-2016    | Obafemi Awolowo University Teaching Hospitals Complex (OAUTHC), Ile-Ife, Osun State; University College Hospital (UCH), Ibadan, Oyo State; and University of Ilorin Teaching Hospital (UIH), Ilorin, Kwara State [Colorectal] | Alatise 2018                    |
| NGA     | 160    | 1990-2011    | Obafemi Awolowo University Hospital [Colorectal]                                                                                                                                                                              | Saluja 2014                     |
| NLD     | 45803  | 2010-2014    | Netherlands Cancer Registry                                                                                                                                                                                                   | Brouwer 2018                    |
| NLD     | 30091  | 2015-2016    | Netherlands Cancer Registry [Colorectal]                                                                                                                                                                                      | Walraven 2019                   |
| NOR     | 7466   | 2010-2012    | Population-based national cancer registry                                                                                                                                                                                     | Benitez Majano 2019             |
| NZL     | 14646  | 2000-2012    | New Zealand cancer registry                                                                                                                                                                                                   | Ahmadi 2015                     |
| OMN     | 111    | 2000-2013    | Sultan Qaboos University hospital                                                                                                                                                                                             | Kumar 2015                      |
| PAK     | 12     | 2012-2015    | Jinnah Hospital and Services Hospital, Lahore [Colorectal]                                                                                                                                                                    | Ghazanfar 2017                  |
| PER     | 101    | 2005-2010    | Instituto Nacional de Enfermedades Neoplásicas, Lima                                                                                                                                                                          | Ruiz 2016                       |
| PRI     | 194    | 2006-2011    | Hospital del Maestro [Colorectal]                                                                                                                                                                                             | Cotto 2014                      |
| PRY     | 36     | 2017-2018    | Hospital de Clinicas and Instituto Nacional del Cancer (INCAN) [Colorectal]                                                                                                                                                   | Fleitas-Kanonnikoff 2019        |

(continued)

| Country | Cases  | Years           | Source                                                                                                                              | Reference                |
|---------|--------|-----------------|-------------------------------------------------------------------------------------------------------------------------------------|--------------------------|
| ROU     | 307    | 2007-2011       | “Colentina” Clinical Surgery                                                                                                        | Mastalier 2012           |
| RUS     | 171    | 2000, 2005-2008 | N. N. Blokhin Cancer Research Center, Proctology Department of Oncological Center [Colorectal]                                      | Kushlinskii 2013         |
| SAU     | 324    | 2006-2017       | Department of Pathology, King Fahad Hospital, Madinah [Colorectal]                                                                  | Albasri 2019             |
| SAU     | 175    | 2010-2015       | King Saud University Hospital, Riyadh, King Khalid Hospital, Al Kharj, and Prince Sattam University Hospital, Al Kharj [Colorectal] | Aldiab 2017              |
| SGP     | 8763   | 2011-2015       | Singapore Cancer Registry [Colorectal]                                                                                              | Annual Report, 2017      |
| SRB     | 300    | 2014-2015       | Clinic of Digestive System Surgery, Clinical Center of Serbia [Colorectal]                                                          | Stojkovic Lalosevic 2017 |
| SVN     | 898    | 1991-2000       | Not reported                                                                                                                        | Stor 2019                |
| SWE     | 11216  | 2010-2012       | Swedish Colorectal Cancer Registry                                                                                                  | Benitez Majano 2019      |
| THA     | 1160   | 2003-2012       | Khon Kaen cancer registry [Colorectal]                                                                                              | Phimha 2019              |
| TUN     | 124    | 1995-2011       | Pathology of Mongi Slim Hospital of Tunis [Colorectal]                                                                              | Amara 2015               |
| TUR     | 581    | 2008-2009       | 21 centers in 7 geographic regions                                                                                                  | Aykan 2015               |
| TWN     | 39900  | 2004-2010       | Taiwan Cancer Registry [Colorectal]                                                                                                 | Lee 2019                 |
| TZA     | 332    | 2006-2011       | Bugando Medical Center, Mwanza [Colorectal]                                                                                         | Chalya 2013              |
| USA     | 112746 | 2010-2016       | SEER                                                                                                                                | SEER 2019                |
| YEM     | 50     | 2008            | Al-Gamhouria Teaching Hospital, Aden [Colorectal]                                                                                   | Hamid 2012               |
| ZAF     | 352    | 2009            | Durban Colorectal Unit, Inkosi Albert Luthuli Central Hospital (IALCH), Durban [Colorectal]                                         | Ntombela 2017            |
| ZMB     | 221    | 2007-2015       | Cancer Disease Hospital (CDH) registry [Colorectal]                                                                                 | Asombang 2018            |

### 1.4.4 Rectum

Stage Data Available – Rectum

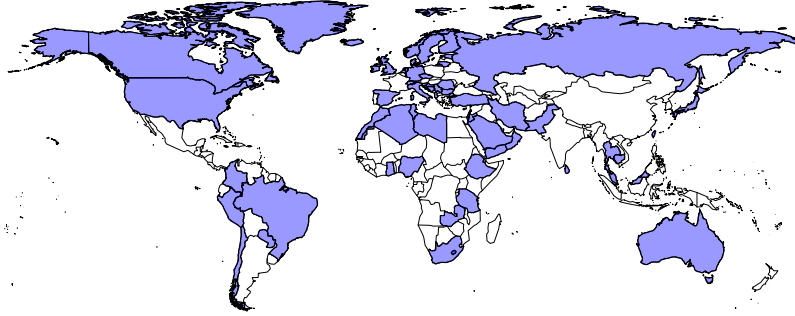

Stage at Diagnosis, Rectum

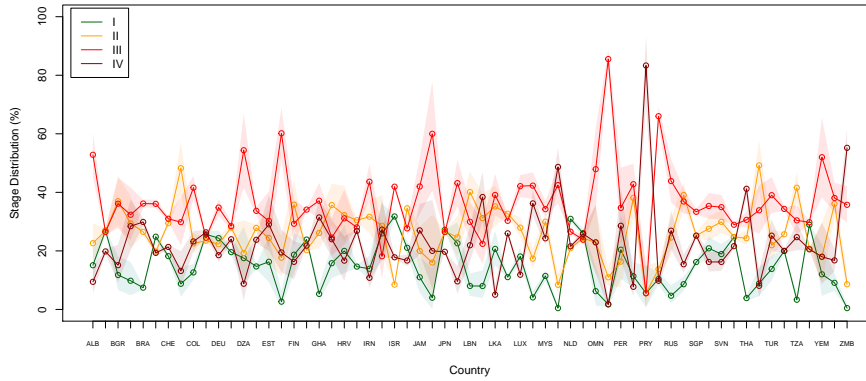

Global: Rectum

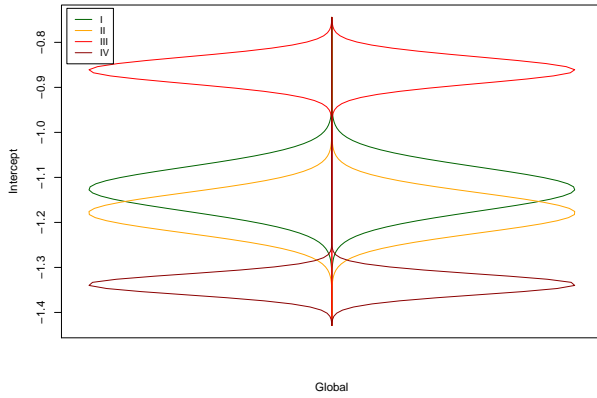

Income Group: Rectum

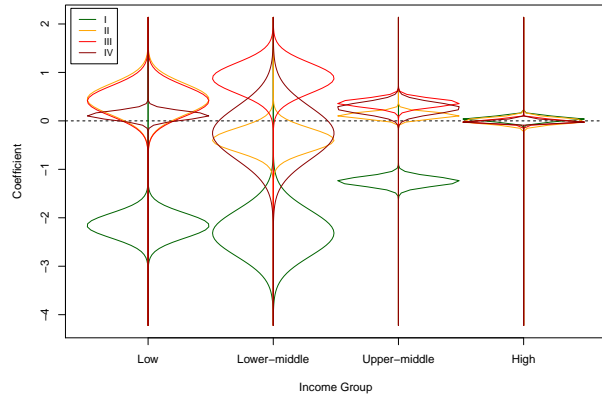

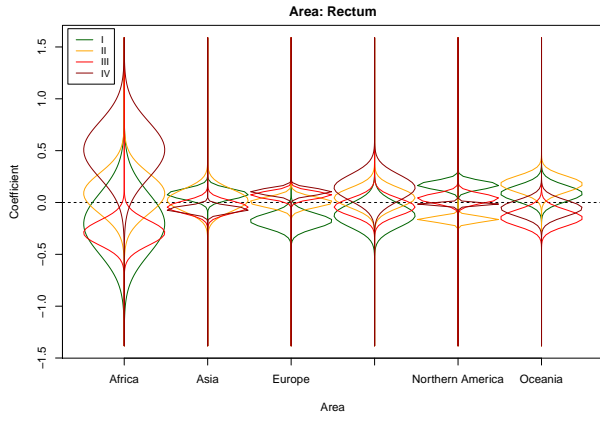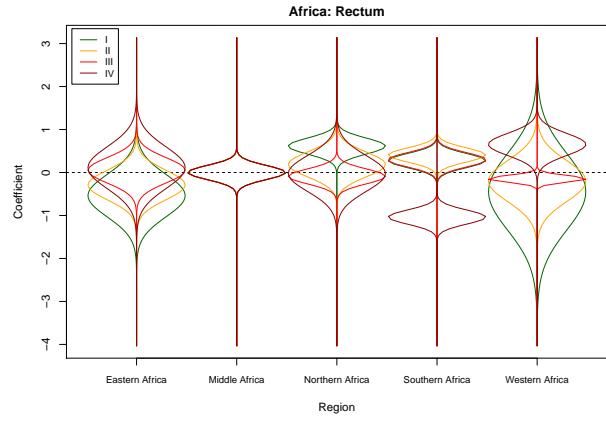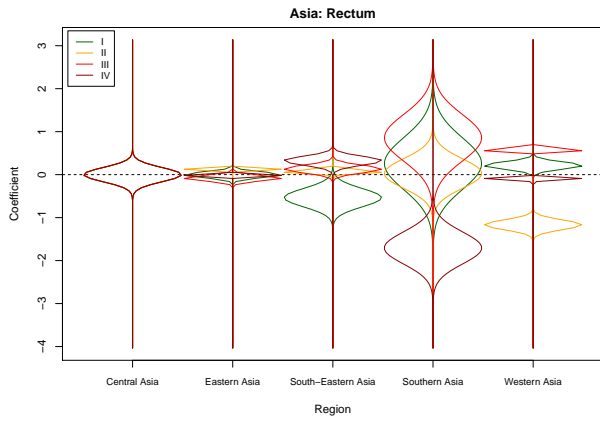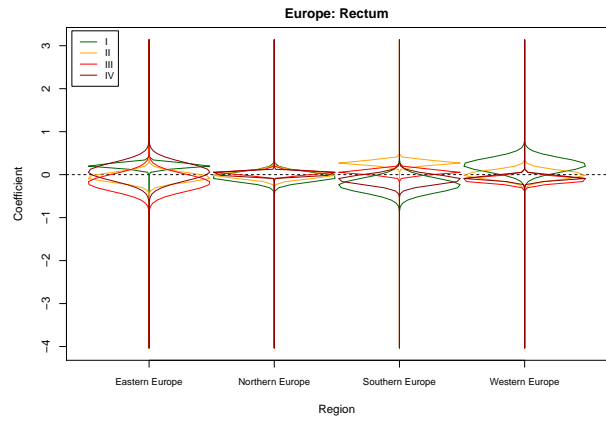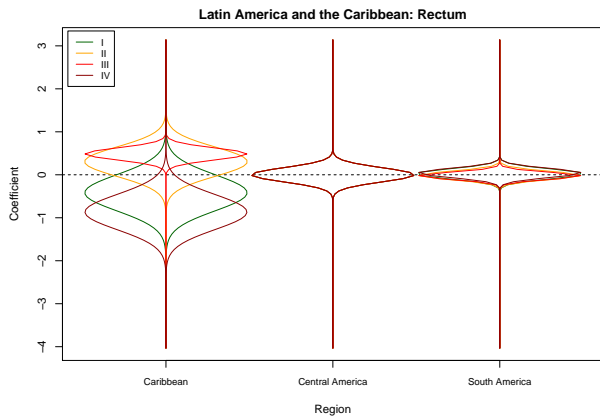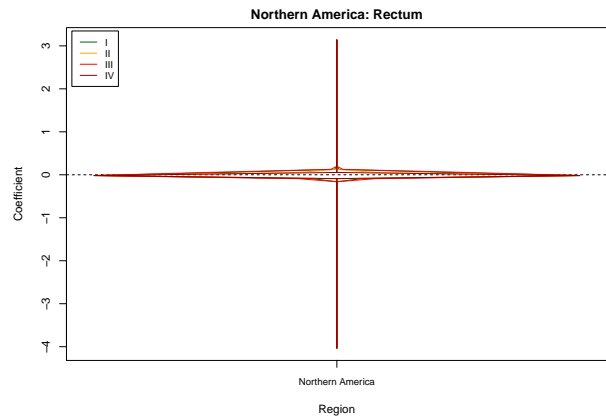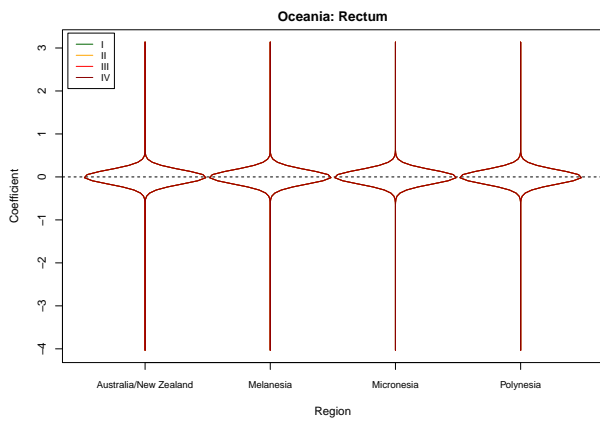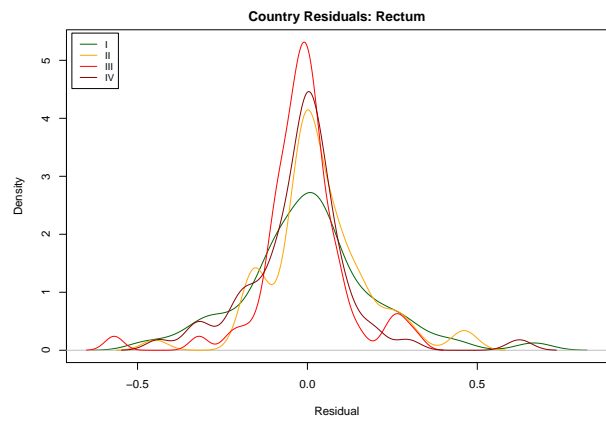

## References

| Country | Cases  | Years        | Source                                                                                                                                                                                                                          | Reference                       |
|---------|--------|--------------|---------------------------------------------------------------------------------------------------------------------------------------------------------------------------------------------------------------------------------|---------------------------------|
| ALB     | 159    | 2012-2013    | Tirana University Hospital [Colorectal]                                                                                                                                                                                         | Martinetti 2014                 |
| AUS     | 3353   | 2017         | Victoria Cancer Registry [Colorectal]                                                                                                                                                                                           | Victoria Cancer Registry 2019   |
| AUS     | 4217   | 2011         | New South Wales Cancer Registry [Colorectal]                                                                                                                                                                                    | Lawrance 2019                   |
| BGR     | 119    | Not reported | University hospital in Stara Zagora and an Oncology centre in Pleven [Colorectal]                                                                                                                                               | Stanilov 2014                   |
| BIH     | 102    | 2014-2015    | Sarajevo Clinical Center, University of Sarajevo [Colorectal]                                                                                                                                                                   | Raši? 2018                      |
| BRA     | 5100   | 2008-2014    | Instituto do Câncer do Estado de São Paulo (ICESP) [Colorectal]                                                                                                                                                                 | Cormedi 2018                    |
| CAN     | 4233   | 2011-2015    | Canadian Cancer Registry                                                                                                                                                                                                        | Canadian Cancer Statistics 2018 |
| CHE     | 9147   | 2000-2008    | SNC?NICER Cancer Epidemiology Study [Colorectal]                                                                                                                                                                                | Feller 2018                     |
| CHL     | 53     | 2008-2013    | Clínica Las Condes [Colorectal]                                                                                                                                                                                                 | Alvarez 2017                    |
| CHL     | 61     | 2012-2014    | Clínica Las Condes [Colorectal]                                                                                                                                                                                                 | Gonzalez-Quiroz 2016            |
| COL     | 577    | 2011-2015    | Instituto de Cancerología (IDC) Las Américas, de Medellín                                                                                                                                                                       | Campo-Sanchez 2019              |
| CZE     | 8333   | 2015         | Modelled estimates based on data from Czech National Cancer Registry [Colorectal]                                                                                                                                               | Dusek 2015                      |
| DEU     | 860    | 1996-1998    | Munich Cancer Registry                                                                                                                                                                                                          | Engel 2005                      |
| DEU     | 203    | 1999-2000    | Cancer Registry of Rostock                                                                                                                                                                                                      | Fietkau 2004                    |
| DNK     | 801    | 1997         | National cancer registry                                                                                                                                                                                                        | Folkesson 2009                  |
| DNK     | 3822   | 2010-2012    | Population-based national cancer registry                                                                                                                                                                                       | Benitez Majano 2019             |
| DZA     | 57     | 2009-2015    | Division of surgery "A" in Tlemcen                                                                                                                                                                                              | Mesli 2016                      |
| ESP     | 2462   | 2000-2014    | Hospital del Mar Tumour Registry [Colorectal]                                                                                                                                                                                   | Parés-Badell 2017               |
| ESP     | 2447   | 2006-2011    | Mallorca Cancer Registry [Colorectal]                                                                                                                                                                                           | Ramos 2016                      |
| EST     | 86     | 2010-2014    | Estonian Cancer Registry                                                                                                                                                                                                        | Innos 2018                      |
| ETH     | 113    | 2016-2017    | Tikur Anbessa Hospital [Colorectal]                                                                                                                                                                                             | Deressa 2019                    |
| FIN     | 123    | 1997         | National cancer registry                                                                                                                                                                                                        | Folkesson 2009                  |
| GBR     | 50792  | 2013-2017    | England ONS                                                                                                                                                                                                                     | ONS 2019                        |
| GBR     | 654    | 1997         | Scotland - National cancer registry                                                                                                                                                                                             | Folkesson 2009                  |
| GBR     | 23234  | 2010-2012    | Population-based national cancer registry                                                                                                                                                                                       | Benitez Majano 2019             |
| GHA     | 221    | 2009-2015    | Komfo Anokye Teaching Hospital (KATH), Kumasi [Colorectal]                                                                                                                                                                      | Agyemang-Yeboah 2018            |
| GHA     | 24     | 2013-2016    | Komfo Anokye Teaching Hospital (KATH), Kumasi [Colorectal]                                                                                                                                                                      | Gyedu 2018                      |
| GRL     | 171    | 2004-2012    | The Danish Pathology Data Bank [Colorectal]                                                                                                                                                                                     | Odgaard 2018                    |
| HRV     | 90     | 2009-2010    | Not reported [Colorectal]                                                                                                                                                                                                       | Kust 2017                       |
| IRL     | 12504  | 1994-2002    | National Cancer Registry (Ireland) [Colorectal]                                                                                                                                                                                 | Carsin 2008                     |
| IRN     | 259    | 2002-2007    | Cancer registry of the Research Center of Gastroenterology and Liver Disease (RCGLD), Shahid Beheshti Medical University, Tehran                                                                                                | Asghari-Jafarabadi 2009         |
| ISL     | 77     | 1997         | National cancer registry                                                                                                                                                                                                        | Folkesson 2009                  |
| ISR     | 29271  | 1970-1996    | Israel National Cancer Registry [Colorectal]                                                                                                                                                                                    | Barchana 2004                   |
| ITA     | 1358   | 2004-2009    | Tumor Registry of Parma [Colorectal]                                                                                                                                                                                            | Negri 2019                      |
| JAM     | 100    | 2008-2012    | University of the West Indies, Kingston [Colorectal]                                                                                                                                                                            | Plummer 2016                    |
| JOR     | 25     | 2008-2015    | King Abdullah University Hospital (KAUH) [Colorectal]                                                                                                                                                                           | Al-Husein 2018                  |
| JPN     | 225172 | 2012-2015    | Nationwide hospital-based cancer registries [Colorectal]                                                                                                                                                                        | Okuyama 2018                    |
| KHM     | 146    | 2005-2010    | Khmer-Soviet Friendship Hospital, Phnom Penh [Colorectal]                                                                                                                                                                       | Hav 2011                        |
| LBN     | 187    | 2005-2012    | Hotel-Dieu de France Hospital, Beirut [Colorectal]                                                                                                                                                                              | Nehmeh 2018                     |
| LBY     | 125    | 2012         | Benghazi Medical Center [Colorectal]                                                                                                                                                                                            | Bodalal 2014                    |
| LKA     | 179    | 2010-2014    | University Surgical Unit at the North Colombo Teaching Hospital [Colorectal]                                                                                                                                                    | Chandrasinghe 2017              |
| LTU     | 13689  | 2000-2012    | Lithuanian Cancer Registry and the National Health Insurance Fund database [Colorectal]                                                                                                                                         | Dulskas 2019                    |
| LUX     | 641    | 1988-1998    | Morphologic Tumour Registry (MTR)                                                                                                                                                                                               | Scheiden 2003                   |
| MAR     | 461    | 2009-2011    | 10 cancer centers [Colorectal]                                                                                                                                                                                                  | Mrabti 2016                     |
| MYS     | 1214   | 2008-2009    | Malaysia National Cancer Patient Registry [Colorectal]                                                                                                                                                                          | Hassan 2016                     |
| NGA     | 66     | 2014-2016    | Obafemi Awolowo University Teaching Hospitals Complex (OAUTHC), Ile-Ife, Osun State; University College Hospital (UCH), Ibadan, Oyo State; and University of Ilorin Teaching Hospital (UIITH), Ilorin, Kwara State [Colorectal] | Alatise 2018                    |
| NGA     | 160    | 1990-2011    | Obafemi Awolowo University Hospital [Colorectal]                                                                                                                                                                                | Saluja 2014                     |
| NLD     | 19632  | 2010-2014    | Netherlands Cancer Registry                                                                                                                                                                                                     | Brouwer 2018                    |
| NOR     | 2708   | 2010-2012    | Population-based national cancer registry                                                                                                                                                                                       | Benitez Majano 2019             |
| OMN     | 48     | 2000-2013    | Sultan Qaboos University hospital                                                                                                                                                                                               | Kumar 2015                      |
| PAK     | 401    | 1996-2015    | Shaikat Khanum Memorial Cancer Hospital (SKMC), Lahore                                                                                                                                                                          | Khan 2019                       |
| PER     | 49     | 2005-2010    | Instituto Nacional de Enfermedades Neoplásicas, Lima                                                                                                                                                                            | Ruiz 2016                       |
| PRI     | 194    | 2006-2011    | Hospital del Maestro [Colorectal]                                                                                                                                                                                               | Cotto 2014                      |
| PRY     | 36     | 2017-2018    | Hospital de Clinicas and Instituto Nacional del Cancer (INCAN) [Colorectal]                                                                                                                                                     | Fleitas-Kanonnikoff 2019        |
| ROU     | 498    | 2012-2017    | Clinic of Oncological Surgery in Iasi                                                                                                                                                                                           | Scripcariu 2018                 |
| ROU     | 317    | 2000-2008    | Ion Chiricuta Institute of Oncology                                                                                                                                                                                             | Vlad 2015                       |



(continued)

| Country | Cases | Years           | Source                                                                                                                              | Reference                |
|---------|-------|-----------------|-------------------------------------------------------------------------------------------------------------------------------------|--------------------------|
| RUS     | 171   | 2000, 2005-2008 | N. N. Blokhin Cancer Research Center, Proctology Department of Oncological Center [Colorectal]                                      | Kushlinskii 2013         |
| SAU     | 324   | 2006-2017       | Department of Pathology, King Fahad Hospital, Madinah [Colorectal]                                                                  | Albasri 2019             |
| SAU     | 175   | 2010-2015       | King Saud University Hospital, Riyadh, King Khalid Hospital, Al Kharj, and Prince Sattam University Hospital, Al Kharj [Colorectal] | Aldiab 2017              |
| SGP     | 8763  | 2011-2015       | Singapore Cancer Registry [Colorectal]                                                                                              | Annual Report, 2017      |
| SRB     | 300   | 2014-2015       | Clinic for Digestive Surgery, Clinical Centre of Serbia, Belgrade [Colorectal]                                                      | Stojkovic Lalosevic 2017 |
| SRB     | 150   | 2007-2010       | Clinic for Digestive Surgery, Clinical Centre of Serbia, Belgrade [Colorectal]                                                      | Krivokapic 2012          |
| SVN     | 518   | 1991-2000       | Not reported                                                                                                                        | Stor 2019                |
| SWE     | 5356  | 2010-2012       | Swedish Colorectal Cancer Registry                                                                                                  | Benitez Majano 2019      |
| SWE     | 13571 | 2002-2012       | Several linked nationwide registers                                                                                                 | Riihimaki 2016           |
| THA     | 1160  | 2003-2012       | Khon Kaen cancer registry [Colorectal]                                                                                              | Phimha 2019              |
| TUN     | 124   | 1995-2011       | Pathology of Mongi Slim Hospital of Tunis [Colorectal]                                                                              | Amara 2015               |
| TUR     | 246   | 2008-2009       | 21 centers in 7 geographic regions                                                                                                  | Aykan 2015               |
| TWN     | 14272 | 2004-2008       | Taiwan Cancer Registry                                                                                                              | Chiang 2016              |
| TZA     | 332   | 2006-2011       | Bugando Medical Center, Mwanza [Colorectal]                                                                                         | Chalya 2013              |
| USA     | 48035 | 2010-2016       | SEER                                                                                                                                | SEER 2019                |
| YEM     | 50    | 2008            | Al-Gamhouria Teaching Hospital in Aden [Colorectal]                                                                                 | Hamid 2012               |
| ZAF     | 352   | 2009            | Durban Colorectal Unit, Inkosi Albert Luthuli Central Hospital (IALCH), Durban [Colorectal]                                         | Ntombela 2017            |
| ZMB     | 221   | 2007-2015       | Cancer Disease Hospital (CDH) registry [Colorectal]                                                                                 | Asombang 2018            |

### 1.4.5 Anus

Stage Data Available – Anus

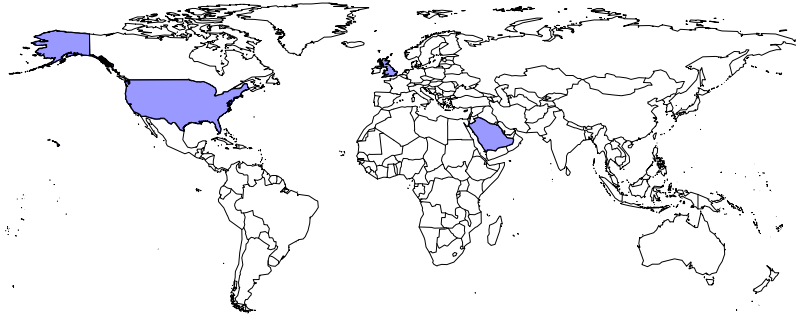

Stage at Diagnosis, Anus

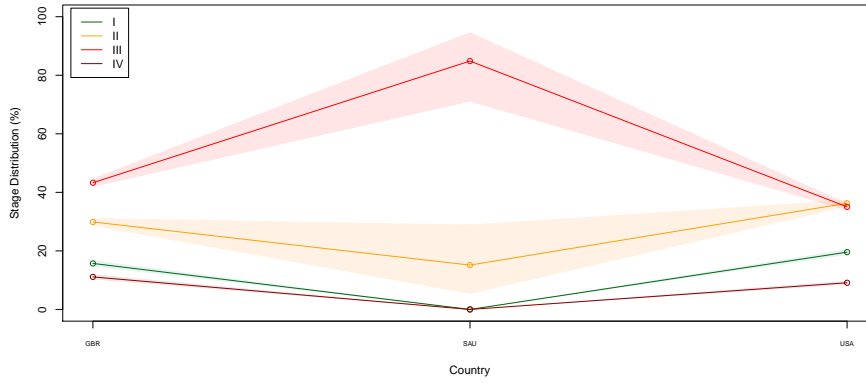

Global: Anus

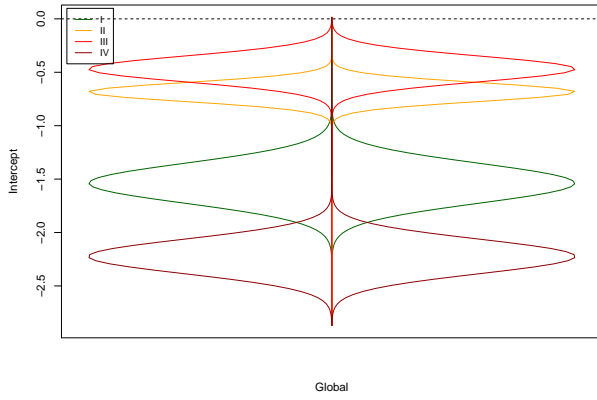

Income Group: Anus

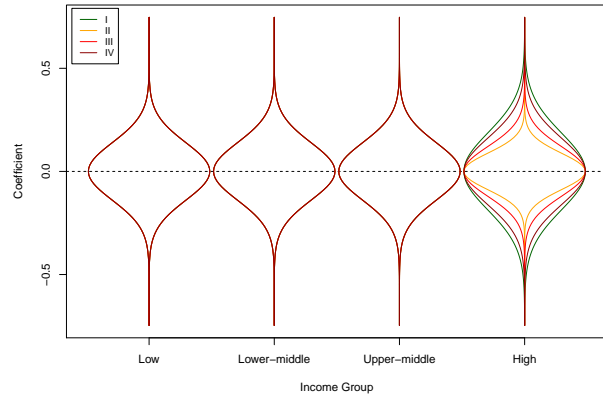

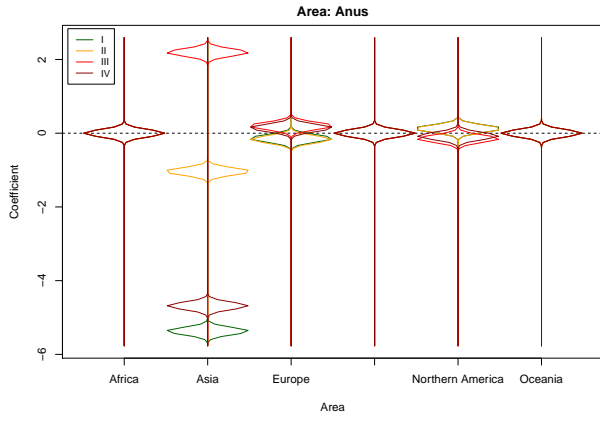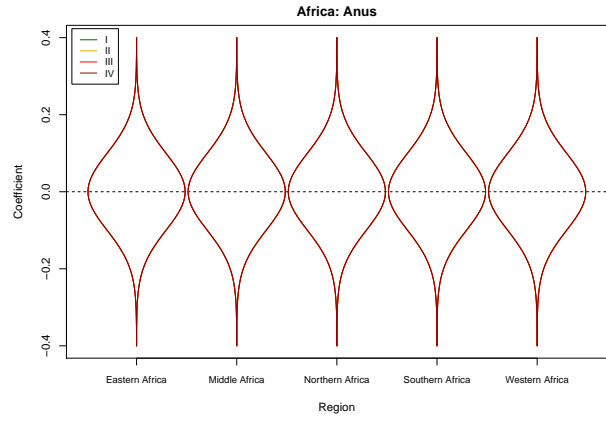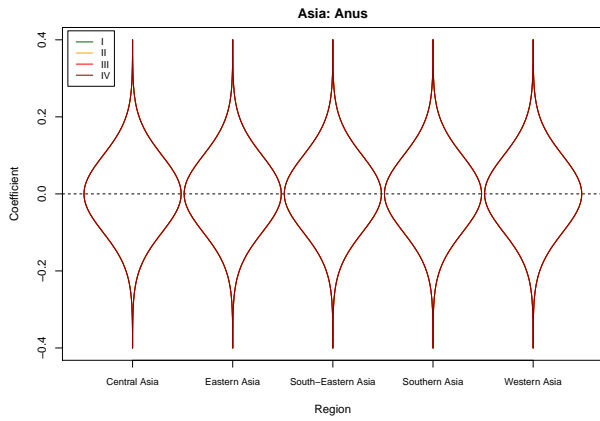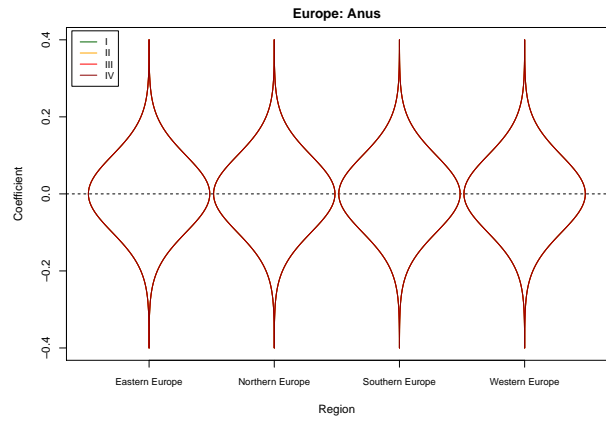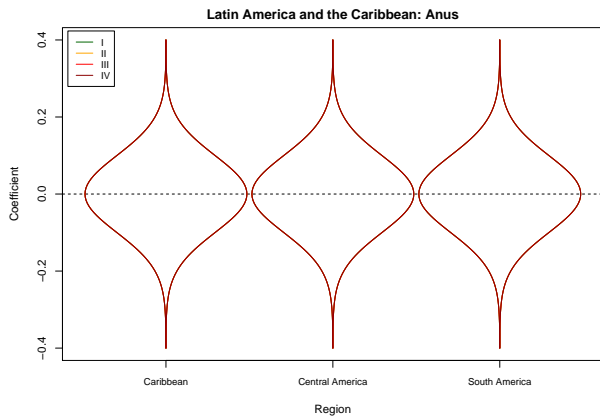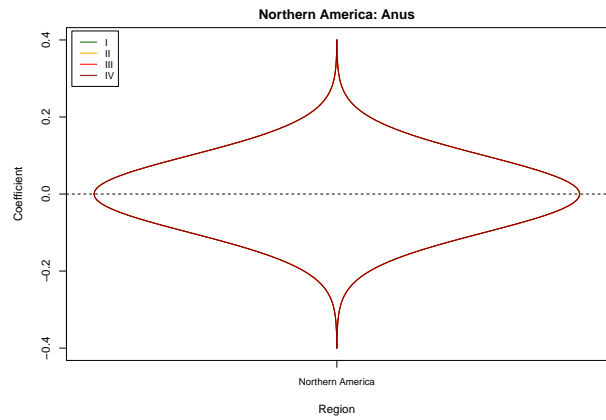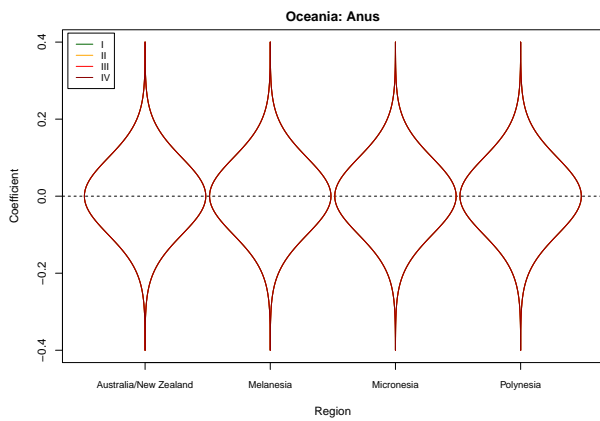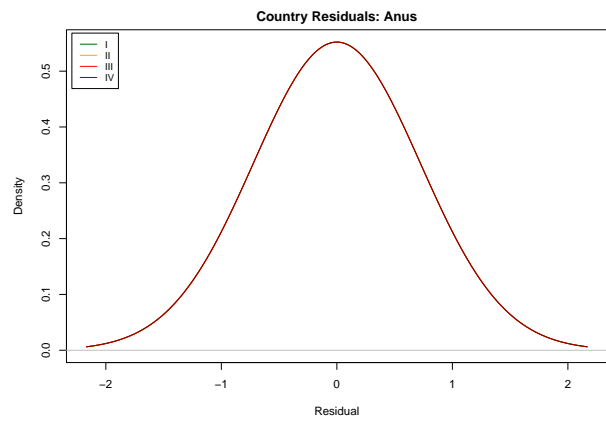

## References

| Country | Cases | Years     | Source                                              | Reference      |
|---------|-------|-----------|-----------------------------------------------------|----------------|
| GBR     | 4447  | 2013-2017 | England ONS                                         | ONS 2019       |
| SAU     | 33    | 1993-2005 | King Faisal Specialist Hospital and Research Centre | El-Haddad 2011 |
| USA     | 6408  | 2010-2016 | SEER                                                | SEER 2019      |

## 1.4.6 Liver

Stage Data Available – Liver

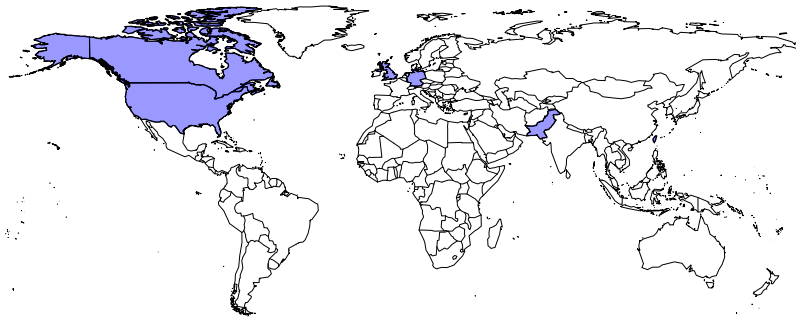

Stage at Diagnosis, Liver

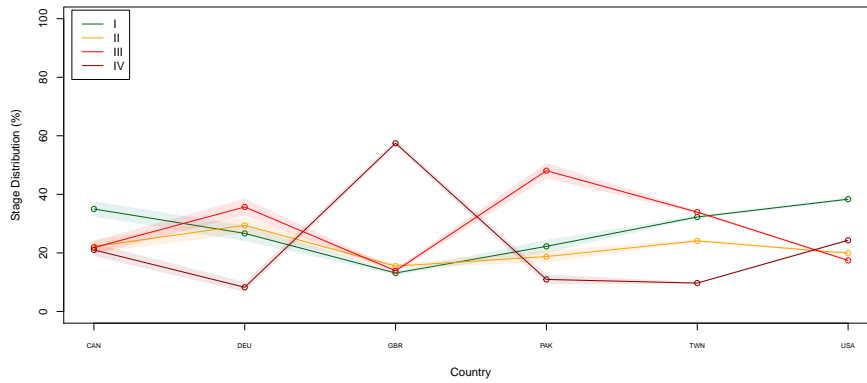

Global: Liver

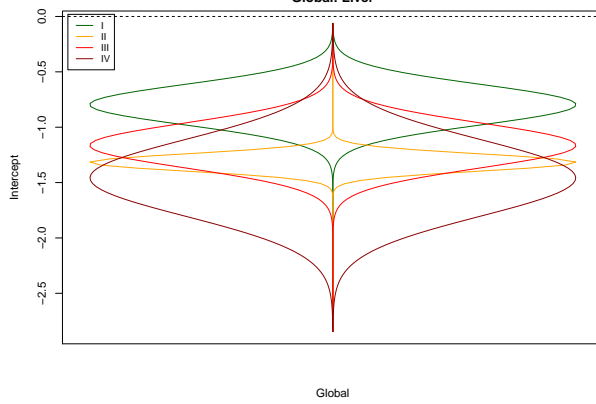

Income Group: Liver

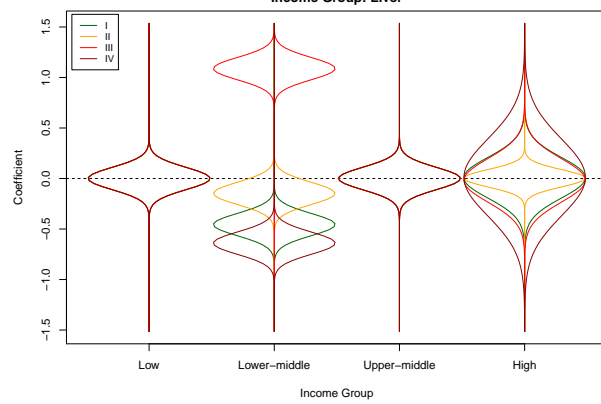

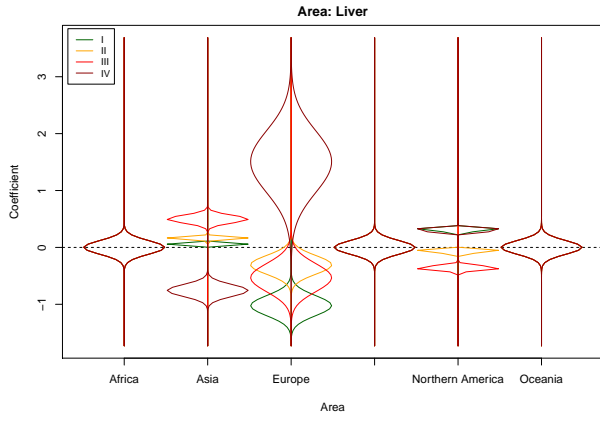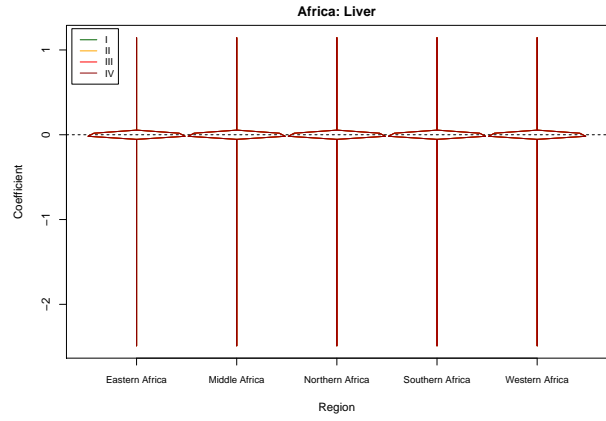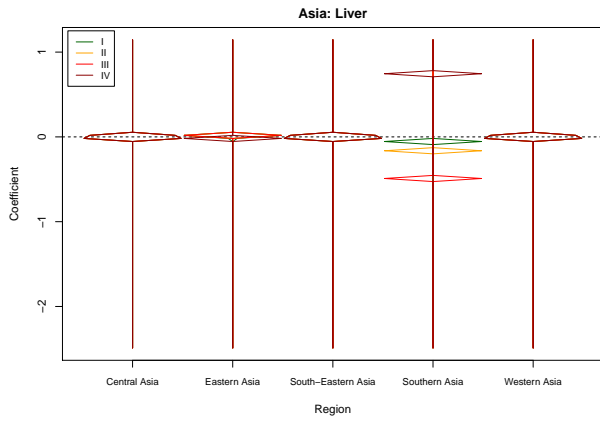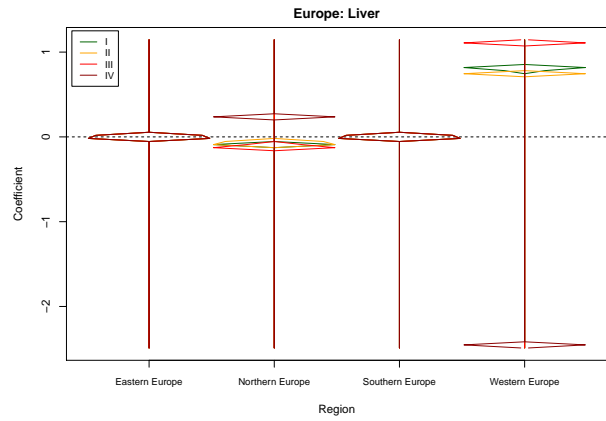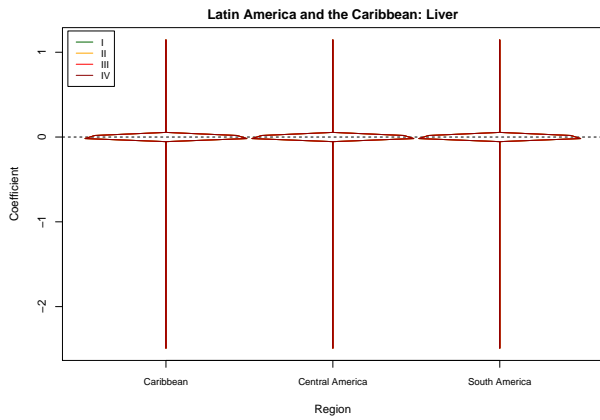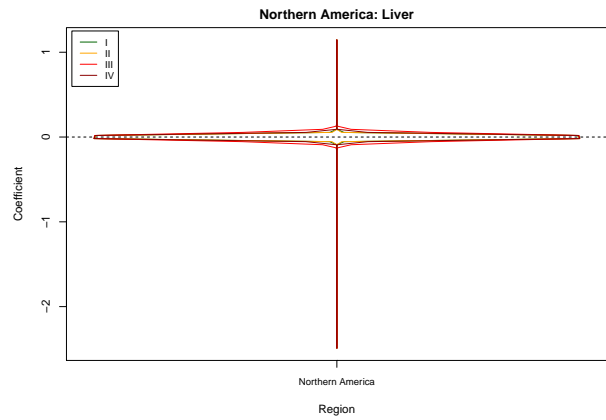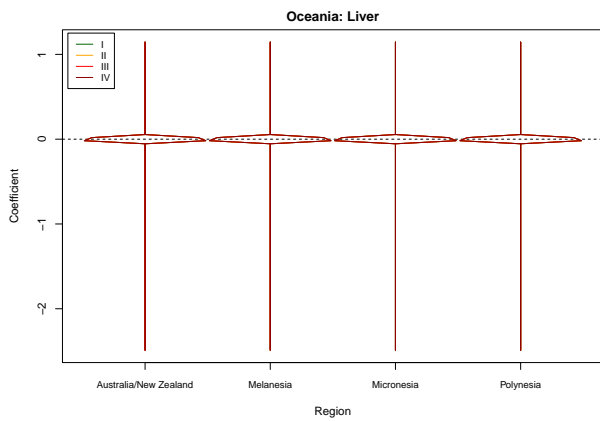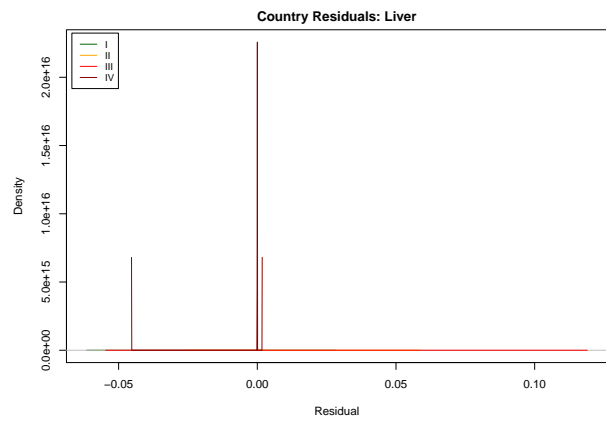

## References

| Country | Cases | Years     | Source                                                              | Reference                       |
|---------|-------|-----------|---------------------------------------------------------------------|---------------------------------|
| CAN     | 1274  | 2011-2015 | Canadian Cancer Registry                                            | Canadian Cancer Statistics 2018 |
| DEU     | 1054  | 1998-2009 | University Medical Center of the Johannes Gutenberg-University      | Weinmann 2014                   |
| GBR     | 10829 | 2013-2017 | England ONS                                                         | ONS 2019                        |
| PAK     | 1381  | 2004-2012 | Shaukat Khanum Memorial Cancer Hospital and Research Centre, Lahore | Badar 2015                      |
| TWN     | 35952 | 2004-2008 | Taiwan Cancer Registry                                              | Chiang 2016                     |
| USA     | 32694 | 2010-2016 | SEER                                                                | SEER 2019                       |

## 1.4.7 Pancreas

Stage Data Available – Pancreas

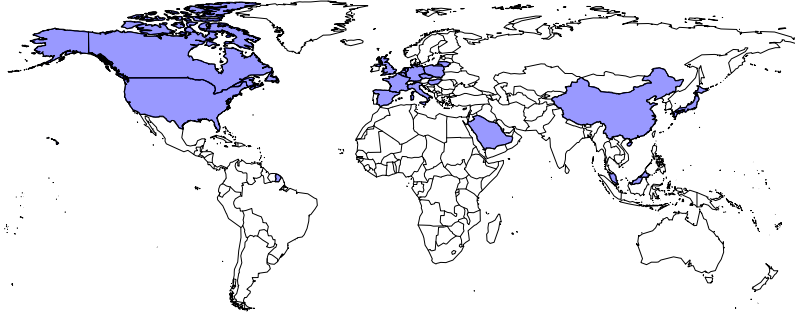

Stage at Diagnosis, Pancreas

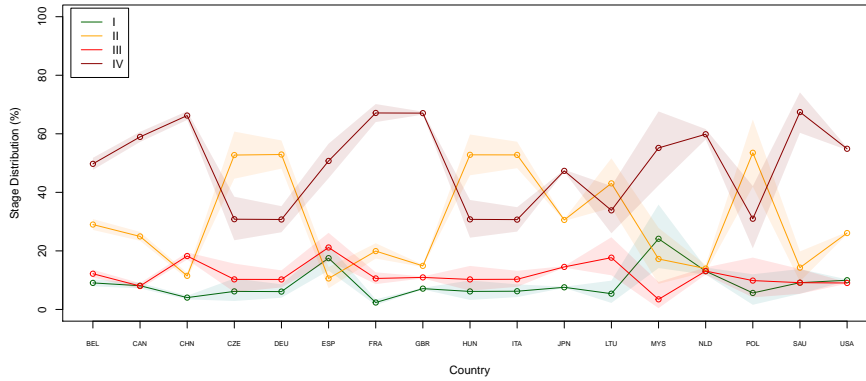

Global: Pancreas

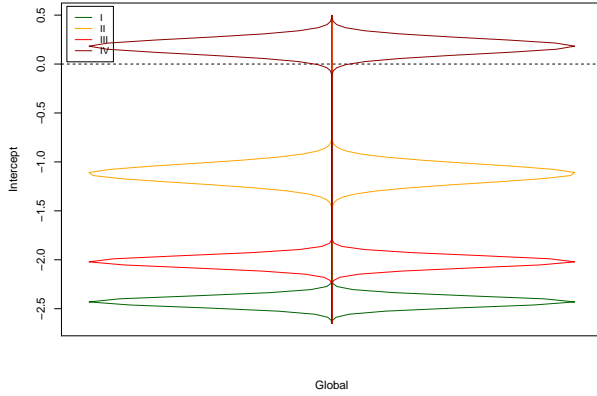

Income Group: Pancreas

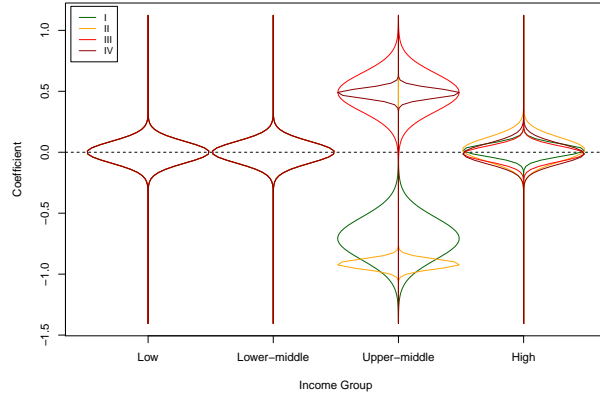



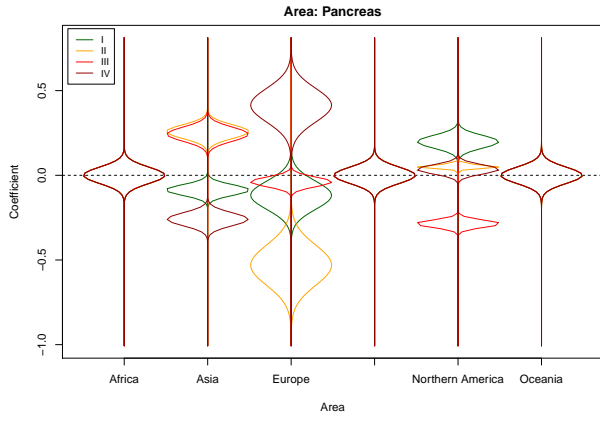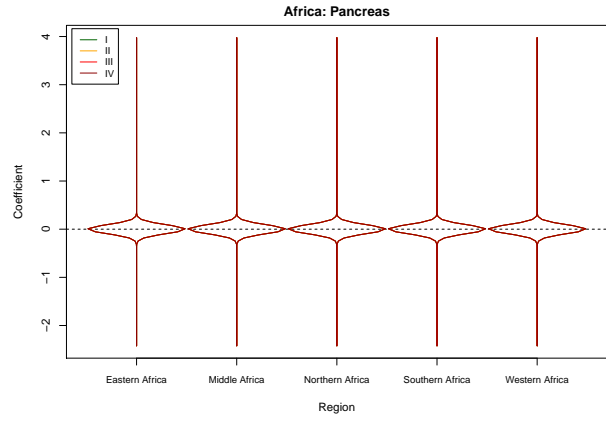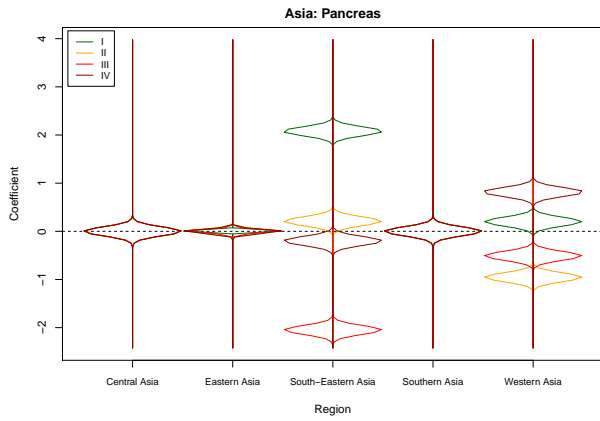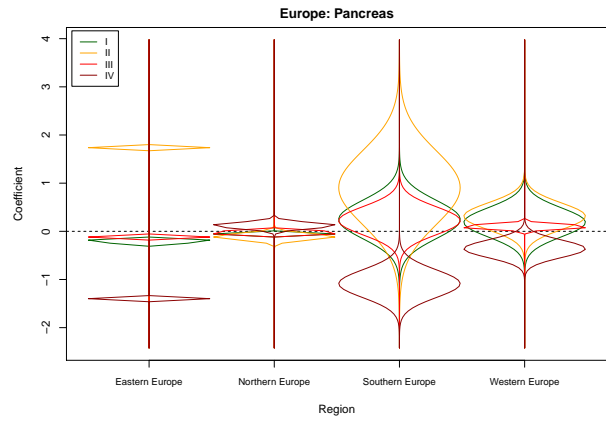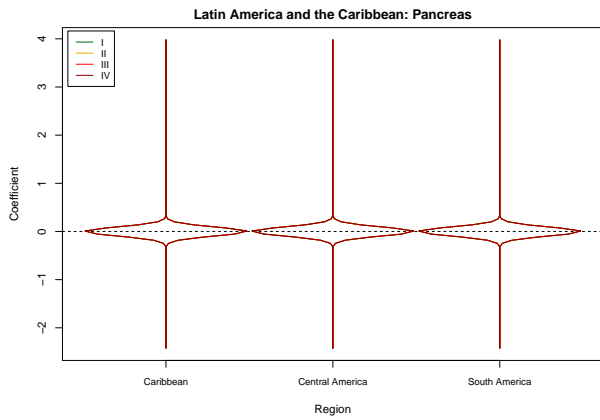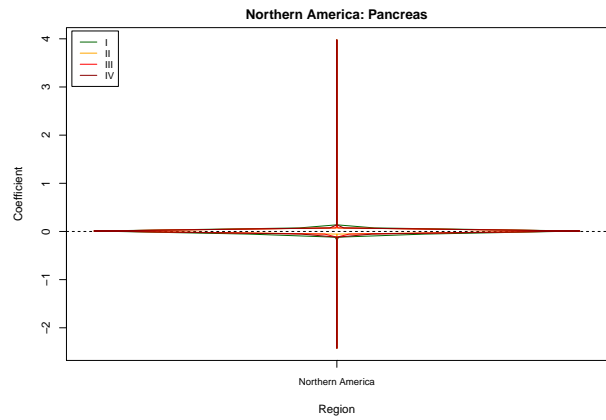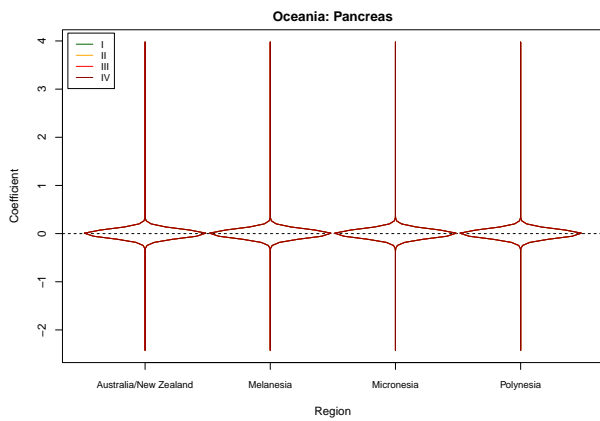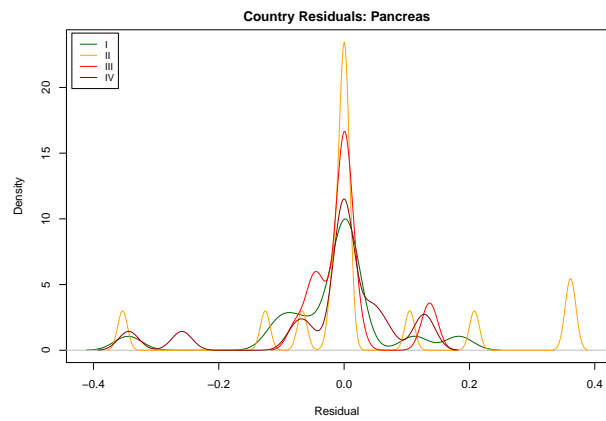

## References

| Country | Cases | Years        | Source                                                                                          | Reference                       |
|---------|-------|--------------|-------------------------------------------------------------------------------------------------|---------------------------------|
| BEL     | 2262  | 2008-2011    | Belgian Cancer Registry                                                                         | Silversmit 2017                 |
| CAN     | 3065  | 2011-2015    | Canadian Cancer Registry                                                                        | Canadian Cancer Statistics 2018 |
| CHN     | 3782  | 2004-2009    | Shanghai Cancer Registry                                                                        | Luo 2013                        |
| CZE     | 146   | Not reported | Pancreatic Disease ReseArch (PANDoRA) consortium                                                | Gentiluomo 2019                 |
| DEU     | 410   | Not reported | Pancreatic Disease ReseArch (PANDoRA) consortium                                                | Gentiluomo 2019                 |
| ESP     | 274   | 1990-2003    | Hospital Clínic of Barcelona                                                                    | Soriano-Isquierdo 2004          |
| FRA     | 888   | 2002-2011    | Finistère digestive cancer registry database                                                    | Arnachellum 2016                |
| GBR     | 30736 | 2013-2017    | England ONS                                                                                     | ONS 2019                        |
| HUN     | 195   | Not reported | Pancreatic Disease ReseArch (PANDoRA) consortium                                                | Gentiluomo 2019                 |
| ITA     | 466   | Not reported | Pancreatic Disease ReseArch (PANDoRA) consortium                                                | Gentiluomo 2019                 |
| JPN     | 64534 | 2012-2015    | Nationwide hospital-based cancer registries                                                     | Okuyama 2018                    |
| LTU     | 52    | Not reported | Pancreatic Disease ReseArch (PANDoRA) consortium                                                | Gentiluomo 2019                 |
| LTU     | 78    | 2005-2007    | Clinic of Gastroenterology, Nephrourology, and Surgery, Faculty of Medicine, Vilnius University | Brimiène 2011                   |
| MYS     | 58    | 2001-2008    | Universiti Sains Malaysia Hospital                                                              | Norsa'adah 2012                 |
| NLD     | 2914  | 2014-2015    | Netherlands Cancer Registry                                                                     | Zijlstra 2018                   |
| POL     | 71    | Not reported | Pancreatic Disease ReseArch (PANDoRA) consortium                                                | Gentiluomo 2019                 |
| SAU     | 175   | 2000-2010    | King Abdulaziz Medical City, Riyadh                                                             | AlGhamdi 2013                   |
| USA     | 49887 | 2010-2016    | SEER                                                                                            | SEER 2019                       |

# 1.4.8 Lung

Stage Data Available – Lung

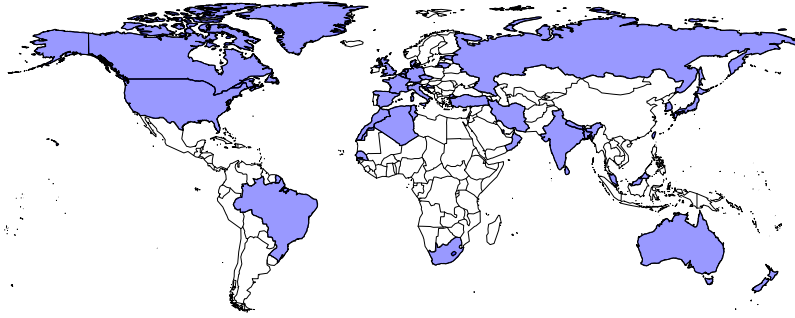

Stage at Diagnosis, Lung

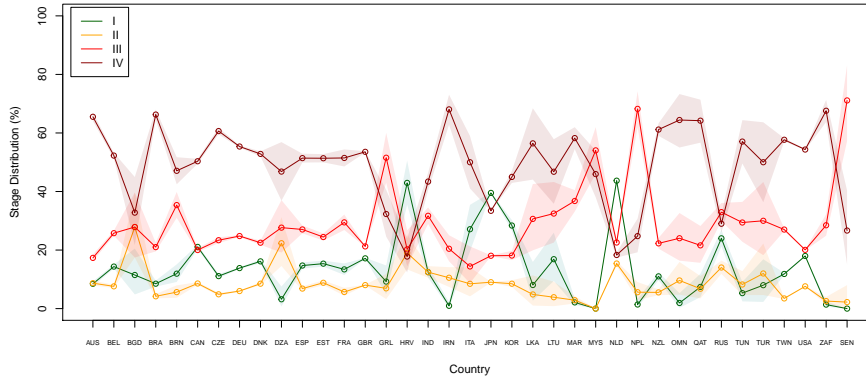

Global: Lung

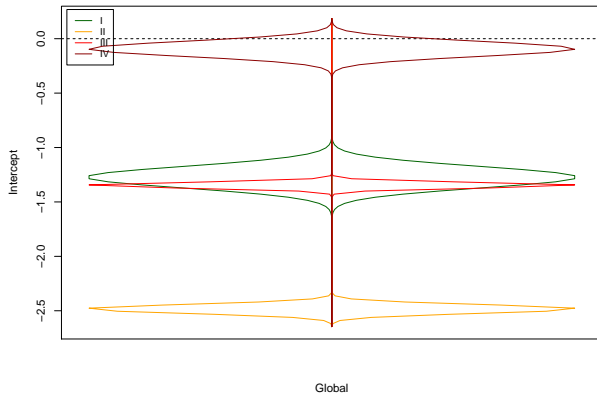

Income Group: Lung

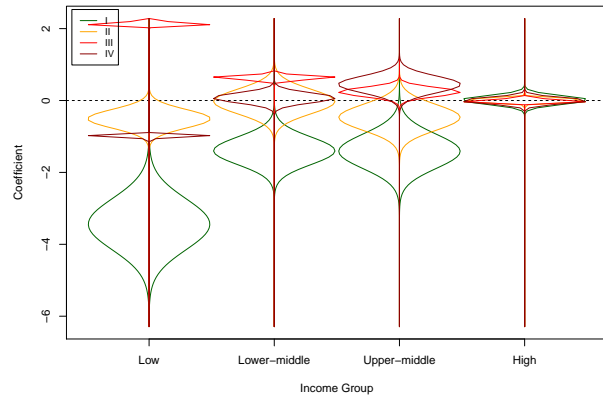

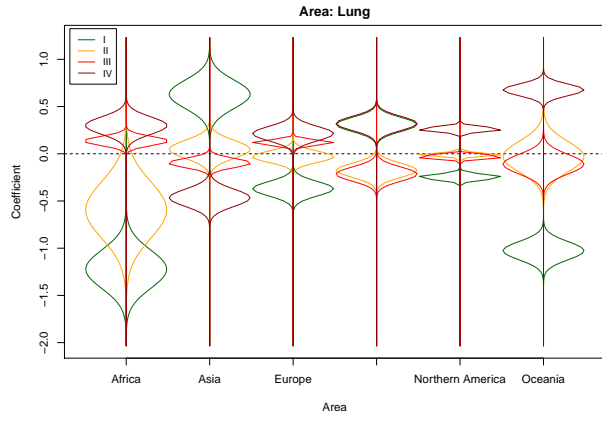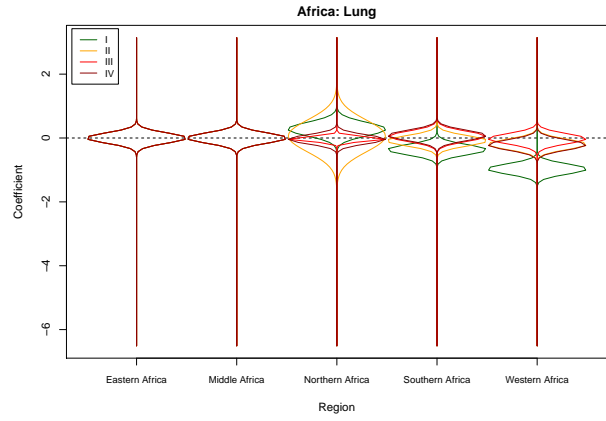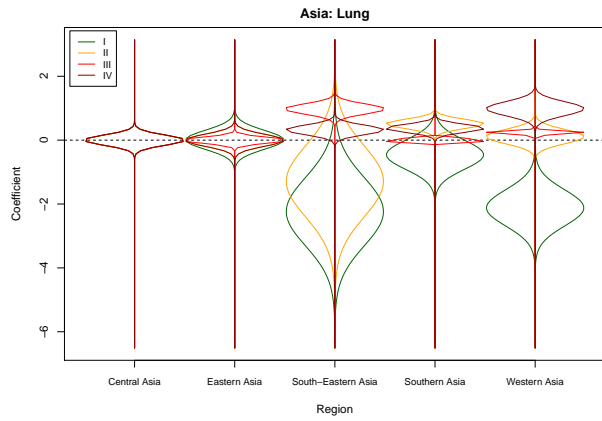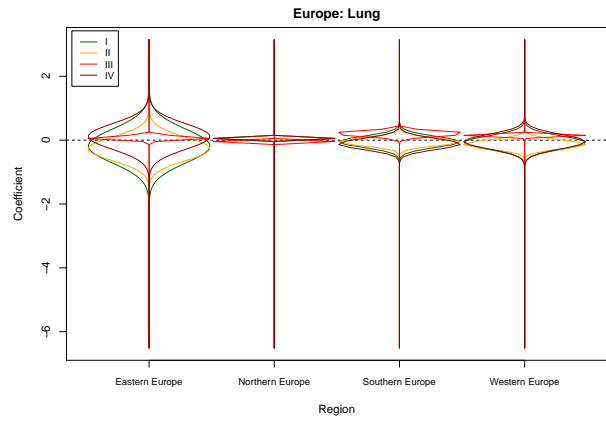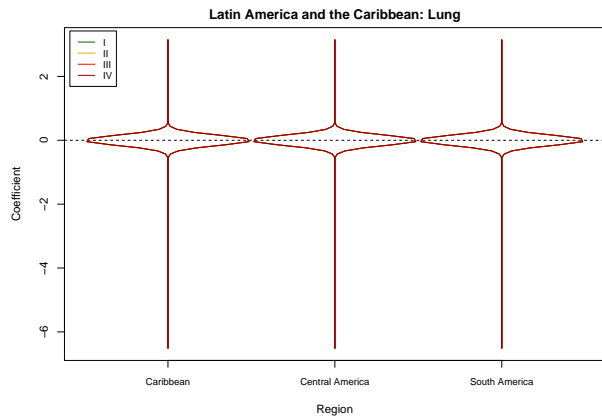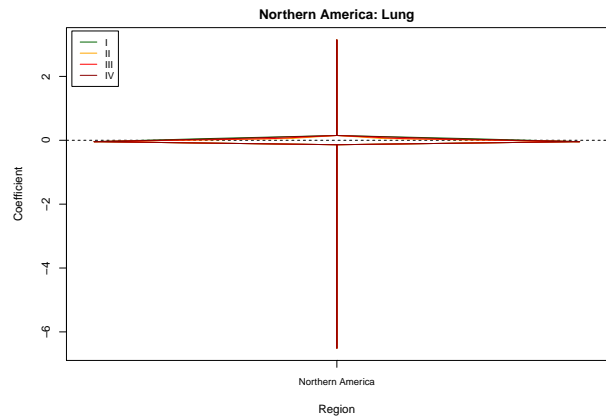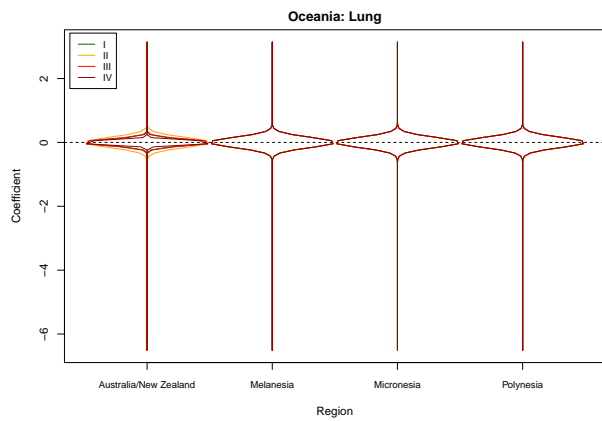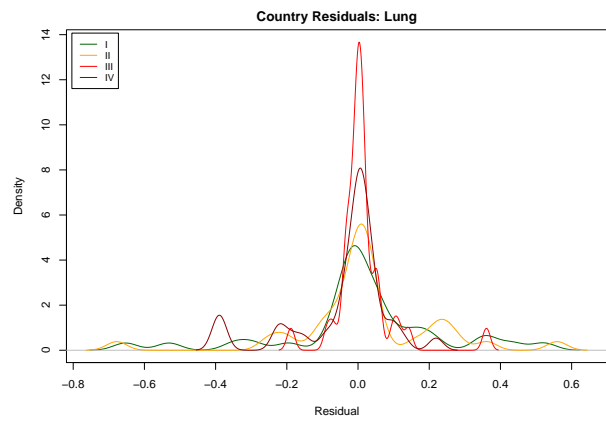

## References

| Country | Cases  | Years        | Source                                                                                                                                                            | Reference                       |
|---------|--------|--------------|-------------------------------------------------------------------------------------------------------------------------------------------------------------------|---------------------------------|
| AUS     | 1707   | 2011         | Victoria Cancer Registry                                                                                                                                          | Victoria Cancer Registry 2019   |
| AUS     | 2368   | 2011         | New South Wales Cancer Registry                                                                                                                                   | Lawrance 2019                   |
| BEL     | 9837   | 2010-2011    | Belgian Cancer Registry (BCR)                                                                                                                                     | Vrijens 2018                    |
| BGD     | 61     | 2009-2011    | National Institute of Diseases of the Chest and Hospital (NIDCH) and National Institute of Cancer Research and Hospital (NICRH)                                   | Rahman 2014                     |
| BRA     | 2785   | 2008-2014    | Instituto do Câncer do Estado de São Paulo (ICESP)                                                                                                                | Cormedi 2018                    |
| BRN     | 444    | 2000-2012    | Four district hospitals, and the Brunei Cancer Centre in Brunei Darussalam                                                                                        | Naing 2017                      |
| CAN     | 13554  | 2011-2015    | Canadian Cancer Registry                                                                                                                                          | Canadian Cancer Statistics 2018 |
| CZE     | 6926   | 2015         | Modelled estimates based on data from Czech National Cancer Registry                                                                                              | Dusek 2015                      |
| DEU     | 74251  | 2007-2010    | 12 population-based cancer registries covering around one third of the German population                                                                          | Eberle 2015                     |
| DNK     | 12083  | 2010-2012    | Danish Lung Cancer Registry                                                                                                                                       | Jakobsen 2016                   |
| DZA     | 94     | Not reported | Mohamed Nekkache Hospital and University Hospital Mustapha Bacha, Algiers                                                                                         | Otsmane 2018                    |
| ESP     | 773    | 2003-2016    | Hospital Universitario Puerta de Hierro Majadahonda (HUPHM)                                                                                                       | Cruz?Bermúdez 2019              |
| ESP     | 1147   | 2010-2011    | Population-based cancer registries and hospital medical records: Granada and Huelva                                                                               | Rodríguez-Barranco 2019         |
| ESP     | 2233   | 2000-2014    | Hospital del Mar Tumour Registry                                                                                                                                  | Parés-Badell 2017               |
| EST     | 4793   | 1996-2016    | Estonian Cancer Registry                                                                                                                                          | Innos 2019                      |
| FRA     | 1127   | 2004         | 10 French cancer registries                                                                                                                                       | Seigneurin 2018                 |
| GBR     | 531    | 2005-2008    | Four Scottish centres: Aberdeen, Glasgow (Stobhill Hospital), Inverclyde, and Dunfermline                                                                         | Grose 2014                      |
| GBR     | 168387 | 2013-2017    | England ONS                                                                                                                                                       | ONS 2019                        |
| GRL     | 130    | 2004-2010    | Queen Ingrid's Hospital                                                                                                                                           | Gelvan 2015                     |
| HRV     | 163    | 2010-2013    | University Hospital Centre, Zagreb                                                                                                                                | Sertic Milic 2015               |
| IND     | 1044   | 2012-2014    | Trivandrum District population-based cancer registry                                                                                                              | Mathew 2019                     |
| IRN     | 313    | 2007-2014    | University hospitals of West Azerbaijan                                                                                                                           | Abazari 2015                    |
| ITA     | 118    | 2004-2013    | Tuscan Cancer Registry data                                                                                                                                       | Paci 2017                       |
| JPN     | 233061 | 2012-2015    | Nationwide hospital-based cancer registries                                                                                                                       | Okuyama 2018                    |
| KOR     | 2234   | 2014         | Korean Central Cancer Registry                                                                                                                                    | Choi 2019                       |
| LKA     | 62     | 2010-2011    | Respiratory unit of Teaching Hospital Kandy                                                                                                                       | Dassanayake 2012                |
| LTU     | 77     | 2009-2010    | Hospital of the Lithuanian University of Health Sciences Kauno Klinikos                                                                                           | Vaguliene 2011                  |
| MAR     | 273    | 2005-2008    | Rabat Cancer Registry                                                                                                                                             | Lachgar 2016                    |
| MAR     | 388    | 2004         | Grand-Casablanca-Region Cancer Register                                                                                                                           | Tachfouti 2012                  |
| MYS     | 148    | 2007-2010    | Hospital Tengku Ampuan Afzan, Kuantan, Pahang                                                                                                                     | How 2005                        |
| NLD     | 6874   | 2012-2016    | Dutch Lung Cancer Audit                                                                                                                                           | Beck 2018                       |
| NPL     | 93     | 2011-2012    | Thoracic Surgery Unit of the Department of Cardio-Thoracic Vascular Surgery, Institute of Medicine, Tribhuvan University                                          | Thapa 2014                      |
| NPL     | 121    | 2009-2010    | B. P. Koirala Memorial Cancer Hospital (BPKMCH), Bharatpur, Chitwan                                                                                               | Hashibe 2011                    |
| NZL     | 1970   | 2011-2015    | New Zealand Cancer Registry                                                                                                                                       | Lawrenson 2018                  |
| OMN     | 104    | 2000-2015    | Sultan Qaboos University Hospital, Muscat                                                                                                                         | Furrukh 2017                    |
| QAT     | 162    | 1998-2005    | Qatari national cancer registry database and 2 hospitals: Hamad General Hospital and Al-Amal Hospital                                                             | Ibrahim 2010                    |
| RUS     | 721    | Not reported | South of Russia                                                                                                                                                   | Kit 2017                        |
| RUS     | 75     | 2013-2014    | Novosibirsk Research Institute of Circulation Pathology of Academician E.N. Meshalkin (Novosibirsk, Russia) and Cancer Research Institute of RAMS (Tomsk, Russia) | Zaporozhchenko 2016             |
| RUS     | 87     | Not reported | Krasnoyarsk Territorial Oncological Center                                                                                                                        | Belonogov 2009                  |
| SEN     | 45     | 2006         | Specialized centers in Dakar                                                                                                                                      | Agodokpessi 2011                |
| TUN     | 170    | 2009-2011    | Not reported                                                                                                                                                      | Rafrafi 2013                    |
| TUR     | 50     | 2007-2010    | Gulhane Askeri Tip Akademisi (GATA) Haydarpasa Training Hospital, Istanbul                                                                                        | Oztutgan 2016                   |
| TWN     | 31940  | 2004-2008    | Taiwan Cancer Registry                                                                                                                                            | Chiang 2016                     |
| USA     | 210894 | 2010-2016    | SEER                                                                                                                                                              | SEER 2019                       |
| ZAF     | 583    | 2013-2015    | Tygerberg Academic Hospital and the Kuils River Respiratory Centre (Kuils River Hospital), Cape Town                                                              | John 2017                       |

### 1.4.9 Breast

Stage Data Available – Breast

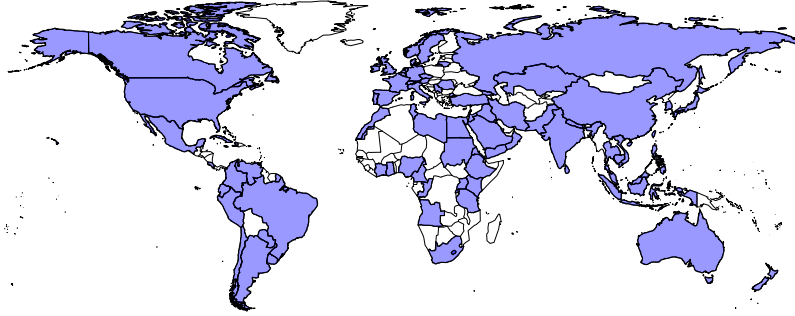

Stage at Diagnosis, Breast

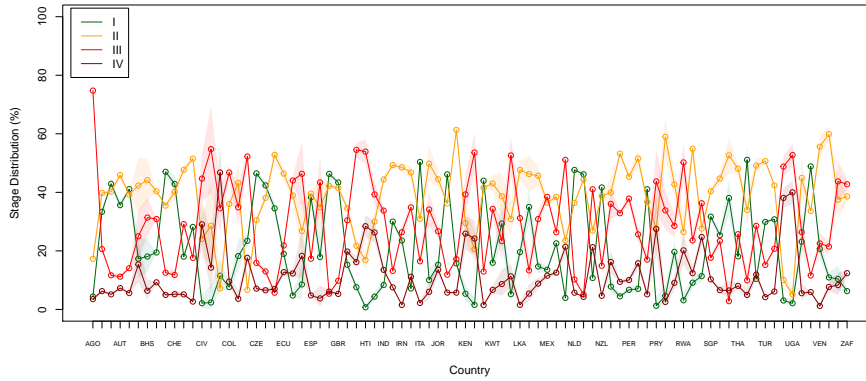

Global: Breast

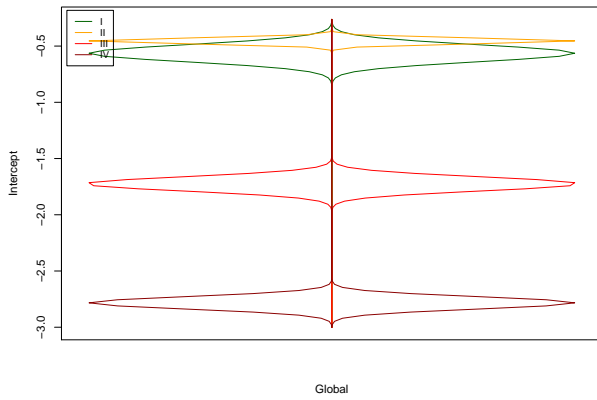

Income Group: Breast

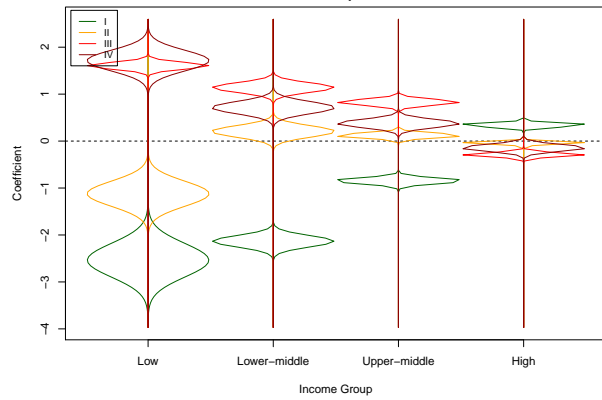

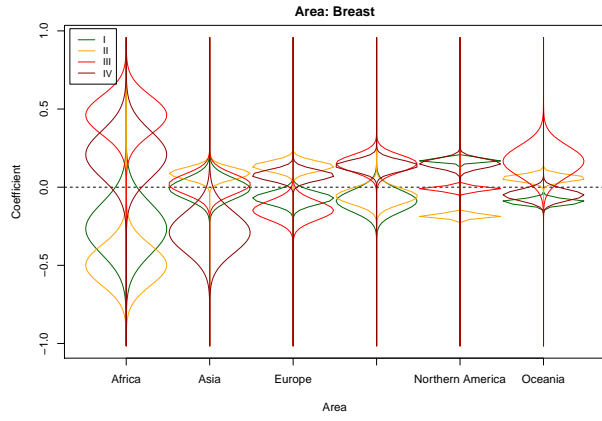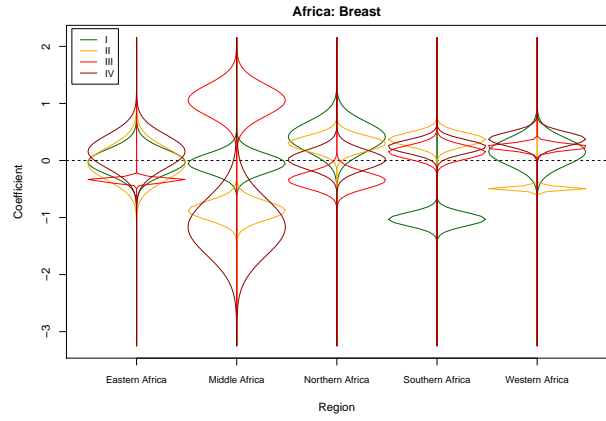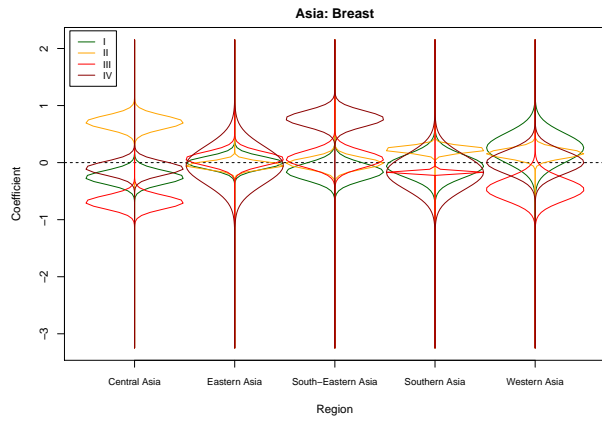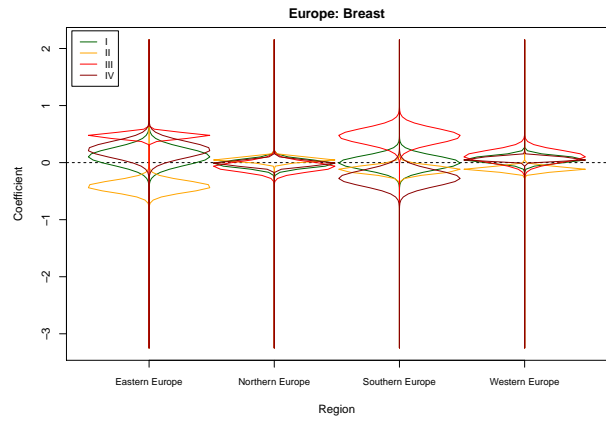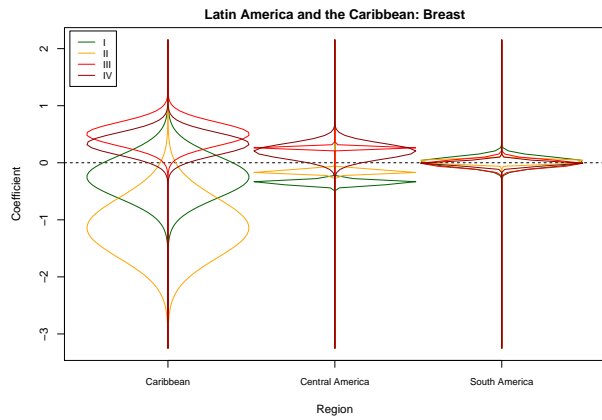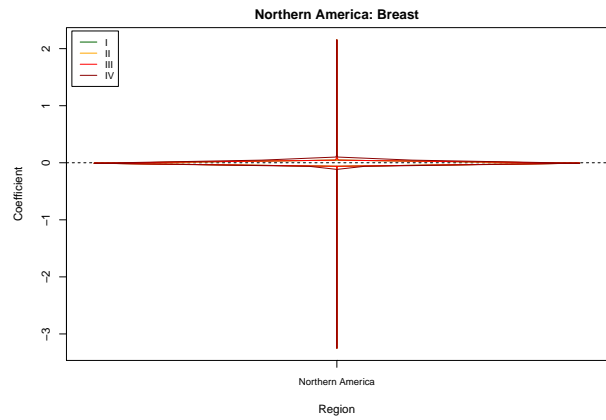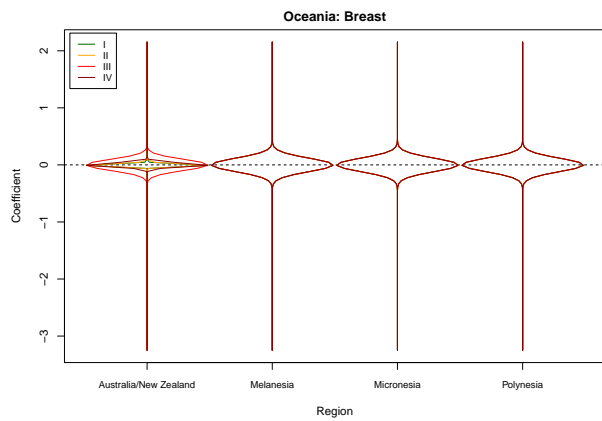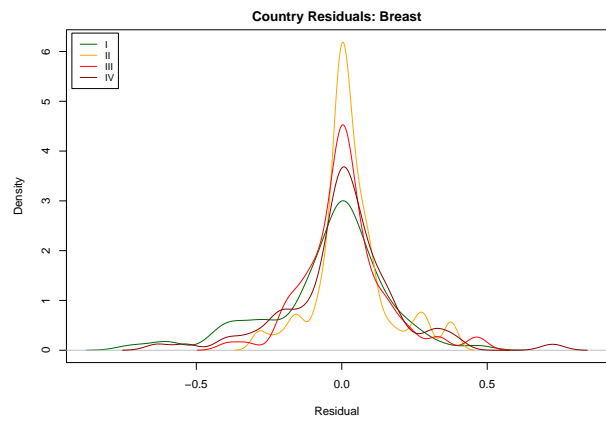

## References

| Country | Cases  | Years     | Source                                                                                                                                                                                                 | Reference                       |
|---------|--------|-----------|--------------------------------------------------------------------------------------------------------------------------------------------------------------------------------------------------------|---------------------------------|
| AGO     | 162    | 2011      | National Oncology Centre of Luanda                                                                                                                                                                     | Armando 2015                    |
| AGO     | 1323   | 2006-2014 | Tertiary hospital in Luanda                                                                                                                                                                            | Lopes 2015                      |
| AGO     | 132    | 2011-2014 | Angolan Institute of Cancer Control and Clínica Sagrada Esperança, Luanda                                                                                                                              | Miguel 2017                     |
| ARG     | 2457   | 2012-2016 | Institutional Tumor Registry of Argentina (RITA)                                                                                                                                                       | Abriata 2019                    |
| ARG     | 3383   |           | [Systematic review: de Lemos 2019]                                                                                                                                                                     | Elizalde 2013                   |
| ARG     | 303    |           | [Systematic review: de Lemos 2019]                                                                                                                                                                     | Grippo 2015                     |
| ARG     | 281    |           | [Systematic review: de Lemos 2019]                                                                                                                                                                     | Juarez 2009                     |
| AUS     | 3935   | 2017      | Victoria Cancer Registry                                                                                                                                                                               | Victoria Cancer Registry 2019   |
| AUS     | 4457   | 2011      | New South Wales Cancer Registry                                                                                                                                                                        | Lawrance 2019                   |
| AUT     | 3913   | 1988-2000 | Cancer Registry of Tyrol                                                                                                                                                                               | Oberaigner 2006                 |
| BEL     | 25178  | 2004-2006 | Three databases were linked at the patient level: the Cancer Registry, the population and the claims databases                                                                                         | Vrijens 2012                    |
| BHR     | 104    | 2010-2013 | Salmaniya Medical Complex, Manama                                                                                                                                                                      | AlZaman 2016                    |
| BHS     | 188    | 2009-2011 | National Oncology Board of the Bahamas                                                                                                                                                                 | Mungrue 2016                    |
| BRA     | 201079 | 2001-2014 | A network of SUS-affiliated hospital-based cancer registries (Registros hospitalares de cancer [RHC])                                                                                                  | Dos-Santos-Silva 2019           |
| CAN     | 16407  | 2011-2015 | Canadian Cancer Registry                                                                                                                                                                               | Canadian Cancer Statistics 2018 |
| CHE     | 1017   | 2003-2007 | Ticino Cancer Registry                                                                                                                                                                                 | Spitale 2009                    |
| CHL     | 4693   | 2000-2010 | Six public hospitals                                                                                                                                                                                   | Del Castillo Sm 2017            |
| CHN     | 288    | 2004-2006 | First Affiliated Hospital of Inner Mongolia Medical College                                                                                                                                            | Kang 2012                       |
| CHN     | 4187   | 2006-2010 | Four hospitals: Cancer Hospital/Chinese Academy of Medical Sciences, Peking University Cancer Hospital, Beijing Obstetrics and Gynecology Hospital, and Shunyi Maternal and Child Health Care Hospital | Zuo 2017                        |
| CHN     | 1997   | 2008-2010 | Hong Kong Breast Cancer Registry                                                                                                                                                                       | Cheung 2012                     |
| CHN     | 3455   | 1999-2008 | Nationwide multi-center study from 7 geographic regions across China (North, North-East, Central, South, East, North-West, and South-West)                                                             | Li 2011                         |
| CIV     | 141    | 2008-2009 | Abidjan cancer registry                                                                                                                                                                                | Islami 2015                     |
| CMR     | 42     | 2006-2009 | Douala General Hospital                                                                                                                                                                                | Nguefack 2012                   |
| COG     | 139    | 2008-2009 | Brazzaville cancer registry                                                                                                                                                                            | Islami 2015                     |
| COL     | 1548   | 2007-2012 | Instituto Nacional de Cancerología of Colombia                                                                                                                                                         | Pardo 2018                      |
| COL     | 233    | 2003-2007 | Manizales population-based Cancer Registry                                                                                                                                                             | Arias-Ortiz 2018                |
| CRI     | 192    | 2009-2010 | San Juan de Dios Hospital of the Costa Rican Social Security System (Caja Costarricense del Seguro Social)                                                                                             | Srur-Rivero 2014                |
| CUB     | 54     |           | [Systematic review: de Lemos 2019]                                                                                                                                                                     | Milián-Mosquera 2015            |
| CUB     | 141    |           | [Systematic review: de Lemos 2019]                                                                                                                                                                     | Viera-Hernández 2011            |
| CUB     | 1315   |           | [Systematic review: de Lemos 2019]                                                                                                                                                                     | Gómez-Delgado 2017              |
| CZE     | 7419   | 2015      | Modelled estimates based on data from Czech National Cancer Registry                                                                                                                                   | Dusek 2015                      |
| DEU     | 4383   | 2001-2013 | Population-based Cancer Registry, Dresden                                                                                                                                                              | Kast 2017                       |
| DNK     | 1735   | 1996-1997 | Danish Cancer Registry                                                                                                                                                                                 | Jensen 2003                     |
| ECU     | 302    |           | [Systematic review: de Lemos 2019]                                                                                                                                                                     | Martínez 2015                   |
| ECU     | 1158   |           | [Systematic review: de Lemos 2019]                                                                                                                                                                     | Cueva and Yopez 2014            |
| ECU     | 621    |           | [Systematic review: de Lemos 2019]                                                                                                                                                                     | Cueva and Yopez 2009            |
| EGY     | 3027   | 2004-2008 | Gharbiah cancer registry                                                                                                                                                                               | Schlichting 2015                |
| ERI     | 82     | 2007-2008 | General Surgical Units of 3 hospitals: Orotta Medical Surgical National Referral Hospital, Halibet Hospital, and Sembel Hospital                                                                       | Tesfamariam 2013                |
| ESP     | 2662   | 2000-2014 | Hospital del Mar Tumour Registry                                                                                                                                                                       | Parés-Badell 2017               |
| ESP     | 4944   | 2000-2012 | Population-based cancer registry in Granada (southern Spain)                                                                                                                                           | Baeyens-Fernandez 2018          |
| ETH     | 106    | 2012-2015 | Tikur Anbessa Specialized Hospital                                                                                                                                                                     | Hadgu 2018                      |
| FRA     | 3978   | 1990-1997 | Cancer Registry of Isere                                                                                                                                                                               | Cluze 2009                      |
| GBR     | 191086 | 2013-2017 | England ONS                                                                                                                                                                                            | ONS 2019                        |
| GBR     | 13998  | 2009-2012 | Scotland Cancer Registry                                                                                                                                                                               | McMenamin 2017                  |
| GEO     | 3580   | 2006-2015 | National population-based cancer registry                                                                                                                                                              | Vashakidze 2018                 |
| GHA     | 56     | 2013-2016 | Komfo Anokye Teaching Hospital (KATH)                                                                                                                                                                  | Gyedu 2018                      |
| GHA     | 179    | 2013      | Korle Bu Teaching Hospital                                                                                                                                                                             | Dedey 2016                      |
| GHA     | 463    | 2008-2011 | Komfo Anokye Teaching Hospital (KATH)                                                                                                                                                                  | Scherber 2014                   |
| GHA     | 564    | 2005-2009 | Department of Pathology, University of Ghana Medical School                                                                                                                                            | Edmund 2013                     |
| GHA     | 330    | 2004-2009 | Komfo Anokye Teaching Hospital (KATH)                                                                                                                                                                  | Ohene-Yeboah 2012               |
| HTI     | 445    | 2013-2017 | Port-au-Prince                                                                                                                                                                                         | Degennaro 2018                  |
| HTI     | 93     | 2013-2015 | Innovating Health International Women's Cancer Center (IHI-WCC) in Port-au-Prince                                                                                                                      | Gomez 2016                      |
| IDN     | 421    | 2010      | Dharmais Cancer Centre (DCC)                                                                                                                                                                           | Ng 2011                         |
| IDN     | 195    | 1998-2002 | Dharmais Cancer Hospital                                                                                                                                                                               | Irawan 2008                     |
| IND     | 132    | 2010-2011 | University Teaching and Tertiary Referral Hospital, Kashmir                                                                                                                                            | Wani 2012                       |
| IND     | 2425   | 2005-2014 | Population Based Cancer Registry, Trivandrum                                                                                                                                                           | Mathew 2016                     |



(continued)

| Country | Cases  | Years                | Source                                                                                                                                                                                     | Reference             |
|---------|--------|----------------------|--------------------------------------------------------------------------------------------------------------------------------------------------------------------------------------------|-----------------------|
| IND     | 906    | 2010-2012            | Hospital based cancer registry of a regional cancer center of North-East India                                                                                                             | Krishnatreya 2014     |
| IRL     | 20816  | 1999-2008            | Irish National Cancer Registry                                                                                                                                                             | Walsh 2014            |
| IRN     | 4748   | Not reported         | Shiraz Breast Cancer Registry                                                                                                                                                              | Akrami 2018           |
| IRQ     | 479    | 2018                 | Duhok                                                                                                                                                                                      | Mohammed 2019         |
| IRQ     | 30     | Not reported         | College of Medicine, Al-Nahrain University, Baghdad                                                                                                                                        | Abdulhussain 2019     |
| IRQ     | 996    | 2011-2015            | Basra Oncology Center                                                                                                                                                                      | Abood 2018            |
| IRQ     | 242    | 2006-2008            | Hewa Hematology and Oncology Hospital, Sulaimaniyah province                                                                                                                               | Majid 2009            |
| ITA     | 138    | 2003-2010            | Morgagni-Pierantoni Hospital (Forli)                                                                                                                                                       | Amadori 2014          |
| ITA     | 1764   | 2003-2009            | Varese section of the Lombardy Cancer Registry                                                                                                                                             | Tagliabue 2016        |
| JAM     | 65     | 2006-2007            | Hospital-based specialist clinic in Kingston, Jamaica                                                                                                                                      | Chin 2014             |
| JAM     | 184    | 2002-2009            | University Hospital of the West Indies                                                                                                                                                     | Alfred 2012           |
| JOR     | 348    | 2004-2014            | Jordan University of Science and Technology (JUST) and King Abdullah Teaching University Hospital (KAUH)                                                                                   | Ayoub 2019            |
| JOR     | 151    | 2013-2014            | Three hospitals in Central and Northern Jordan                                                                                                                                             | Obeidat 2015          |
| JOR     | 721    | 1997-1998            | Jordan Cancer Registry                                                                                                                                                                     | Arkoob 2010           |
| JOR     | 98     | 2000-2002            | Al-Basheer Governmental Hospital                                                                                                                                                           | Atoum 2010            |
| JPN     | 157292 | 2012-2015            | Nationwide hospital-based cancer registries                                                                                                                                                | Okuyama 2018          |
| KAZ     | 4210   | 2014                 | Registry data from fourteen regions and two major cities                                                                                                                                   | Chukmaitov 2018       |
| KEN     | 125    | 2012-2018            | Aga Khan University Hospital, Nairobi                                                                                                                                                      | Ekpe 2019             |
| KEN     | 99     | 2011-2012            | Aga Khan University Hospital, Nairobi                                                                                                                                                      | Sayed 2014            |
| KHM     | 194    | 2008-2011            | Sihanouk Hospital Center of Hope, Phnom Penh                                                                                                                                               | Ley 2016              |
| KOR     | 86784  | 1996-2015            | Korean Breast Cancer Society Registry                                                                                                                                                      | Park 2019             |
| KWT     | 353    | 1999-2009            | Kuwait Cancer Control Center                                                                                                                                                               | Fayaz 2013            |
| KWT     | 902    | 1999-2004            | Clinical oncologists' data                                                                                                                                                                 | Elbasmi 2010          |
| LBN     | 150    | 2009-2014            | American University of Beirut Medical Center (AUBMC)                                                                                                                                       | Akel 2017             |
| LBY     | 100    | 2000-2007            | National Cancer Institute, Sabratha                                                                                                                                                        | Ermiah 2012           |
| LBY     | 130    | 2000-2006            | African Oncology Institute, Sabratha and Tripoli Medical Center, Tripoli                                                                                                                   | Boder 2012            |
| LKA     | 833    | 2006-2012            | University of Ruhuna                                                                                                                                                                       | Peiris 2017           |
| LTU     | 240    | 2008                 | Kaunas region                                                                                                                                                                              | Ivanauskiene 2012     |
| MAR     | 560    | 2005-2008            | Rabat Cancer Registry                                                                                                                                                                      | Mechita 2016          |
| MAR     | 279    | 2010-2015            | Oncology Clinic Al Amal of Tangier                                                                                                                                                         | Derkaoui 2016         |
| MEX     | 397    |                      | [Systematic review: de Lemos 2019]                                                                                                                                                         | Pérez-Michel 2009     |
| MEX     | 816    |                      | [Systematic review: de Lemos 2019]                                                                                                                                                         | Ángeles-Llerenas 2016 |
| MEX     | 2075   |                      | [Systematic review: de Lemos 2019]                                                                                                                                                         | Lara-Medina 2011      |
| MEX     | 4301   |                      | [Systematic review: de Lemos 2019]                                                                                                                                                         | Reynoso-Noverón 2017  |
| MYS     | 328    | 2005-2007            | Three referral medical centres in the East Coast of Malaysia and two government hospitals in Kuala Lumpur                                                                                  | Norsa'adah 2011       |
| MYS     | 447    | 2010                 | University Malaya Medical Centre (UMMC), Kuala Lumpur                                                                                                                                      | Ng 2011               |
| MYS     | 824    | 2014-2015            | Three large hospitals: University Malaya Medical Centre (UMMC), Kuala Lumpur; Tengku Ampuan Rahimah Hospital (TARH), Klang, Selangor; Queen Elizabeth Hospital (QEH), Kota Kinabalu, Sabah | Wong 2019             |
| MYS     | 121    | 2007-2013            | Hospital Sultanah Nora Ismail Batu Pahat, Johor                                                                                                                                            | Balasundram 2018      |
| MYS     | 549    | 2007-2011            | Kelantan Cancer Registry                                                                                                                                                                   | Nordin 2018           |
| MYS     | 446    | 2010-2015            | Sarawak General Hospital                                                                                                                                                                   | Yang 2017             |
| MYS     | 3959   | 2001-2011            | University Malaya Breast Cancer Registry                                                                                                                                                   | Kong 2017             |
| NGA     | 85     | 2016                 | Lagos University Teaching Hospital (LUTH)                                                                                                                                                  | Awofeso 2018          |
| NGA     | 105    | 2015                 | University College Hospital, Ibadan                                                                                                                                                        | Hafiz 2018            |
| NGA     | 300    | 2014-2016            | Six secondary and tertiary hospitals in Nigeria                                                                                                                                            | Jedy-Agba 2017        |
| NGA     | 200    | 2005-2008            | Lagos State University Teaching Hospital (LASUTH) Cancer Registry                                                                                                                          | Makanjuola 2014       |
| NGA     | 103    | 2001-2005            | Ahmadu Bello University Teaching Hospital (ABUTH), Zaria, Kaduna State                                                                                                                     | Kene 2010             |
| NGA     | 34     | 1999-2001            | Jos University Teaching Hospital                                                                                                                                                           | Gukas 2008            |
| NGA     | 89     | 2004-2005            | Oncology Clinic of the Department of Surgery, University College Hospital, Ibadan                                                                                                          | Adebamowo 2008        |
| NLD     | 31277  | 2015-2016            | Netherlands Cancer Registry                                                                                                                                                                | Walraven 2019         |
| NOR     | 14890  | 2005-2010            | Norwegian Cancer Registry                                                                                                                                                                  | Lousdal 2014          |
| NPL     | 85     | 2016-2017            | Three cancer hospitals of Kathmandu, Nepal                                                                                                                                                 | Bhandari 2017         |
| NPL     | 114    | 2007-2008            | Bir Hospital, Kathmandu and BP Koirala Memorial Cancer Hospital, Bharatpur                                                                                                                 | Acharya 2012          |
| NPL     | 1141   | 1999-2006            | Tertiary care center                                                                                                                                                                       | Jah 2010              |
| NZL     | 13644  | 2000-2014            | Auckland and Waikato Breast Cancer Registers                                                                                                                                               | Tin Tin 2018          |
| OMN     | 65     | 2015-2016            | Sultan Qaboos University Hospital                                                                                                                                                          | Naik 2017             |
| OMN     | 118    | 2003-2008            | Sultan Qaboos University Hospital                                                                                                                                                          | Kumar 2011            |
| OMN     | 150    | 1996-2002            | Sultan Qaboos University Hospital and the Royal Hospital                                                                                                                                   | Al-Moundhri 2004      |
| PAK     | 261    | 2012-2013; 2013-2015 | Institute of Nuclear Medicine and Oncology Lahore (INMOL); Services Hospital Lahore (SHL)                                                                                                  | Khokher 2016          |
| PAK     | 834    | 1999-2008            | A university hospital in Southern Pakistan                                                                                                                                                 | Kumar 2016            |

(continued)

| Country | Cases  | Years                | Source                                                                                                                | Reference                  |
|---------|--------|----------------------|-----------------------------------------------------------------------------------------------------------------------|----------------------------|
| PAK     | 1299   | 2001-2010            | Aga Khan University Hospital (AKUH) in Karachi                                                                        | Zeeshan 2019               |
| PAK     | 9461   | 1994-2016            | Liaquat National Hospital, Karachi                                                                                    | Soomro 2018                |
| PAK     | 6214   | 2004-2012            | Shaukat Khanum Memorial Cancer Hospital and Research Centre, Lahore                                                   | Badar 2015                 |
| PER     | 91     | 2015                 | Tertiary care referral cancer center in Trujillo, Peru                                                                | Romanoff 2017              |
| PER     | 75     |                      | [Systematic review: de Lemos 2019]                                                                                    | Larrea-Fernández 2016      |
| PER     | 545    |                      | [Systematic review: de Lemos 2019]                                                                                    | Díaz-Vélez 2013            |
| PER     | 1505   |                      | [Systematic review: de Lemos 2019]                                                                                    | Gutiérrez and Alarcón 2008 |
| PHL     | 1166   | 1993-2002            | Philippine Cancer Society-Manila Cancer Registry and the Department of Health-Rizal Cancer Registry                   | Laudico 2009               |
| PRT     | 1229   | 2005                 | Southern Portugal Cancer Registry (ROR-Sul)                                                                           | Andre 2014                 |
| PRT     | 551    | 2000-2007            | North Region Cancer Registry                                                                                          | Jose Bento 2014            |
| PRY     | 80     |                      | [Systematic review: de Lemos 2019]                                                                                    | Yoffe de Quiroz 2005       |
| ROU     | 173    | 2000-2005            | Municipal Clinical Hospital, Timisoara                                                                                | Zaha 2010                  |
| ROU     | 22     | Not reported         | Not reported                                                                                                          | Suciu 2008                 |
| RUS     | 473    | 2009-2012            | N. N. Blokhin Russian Cancer Research Center                                                                          | Filipenko 2017             |
| RWA     | 42     | Not reported         | King Faisal Hospital and Kigali Teaching Hospital, Kigali                                                             | Habyarimana 2018           |
| RWA     | 39     | 2016                 | Rwanda Military Hospital and King Faysal Hospital, Kigali                                                             | Habyarimana 2018           |
| RWA     | 142    | 2014-2015            | Butaro Cancer Center of Excellence                                                                                    | Schleimer 2019             |
| SAU     | 535    | 2007-2012            | Oncology Department at King Faisal Specialist Hospital & Research Center (KFSH&RC), Riyadh                            | Elkum 2014                 |
| SAU     | 449    | Not reported         | King Abdulaziz University Hospital                                                                                    | Khabaz 2017                |
| SDN     | 1249   | 1999-2006            | Institute of Nuclear Medicine, Molecular Biology and Oncology (INMO) at Gezira University, Wadmedani, al-Gezira State | Elgaili 2010               |
| SGP     | 8773   | 2011-2015            | Singapore Cancer Registry                                                                                             | Annual Report, 2017        |
| SGP     | 1165   | 1990-2002            | National University Hospital Breast Cancer Registry                                                                   | Lim 2007                   |
| SRB     | 2252   | 1985-1990            | Surgical and Oncological Clinic in Nis                                                                                | Djordjevic 2004            |
| SWE     | 247    | 1996-1997            | Swedish Cancer Registry                                                                                               | Jensen 2003                |
| THA     | 3251   | 2006-2015            | Chiang Mai cancer registries                                                                                          | Chitapanarux 2019          |
| TTO     | 362    |                      | [Systematic review: de Lemos 2019]                                                                                    | Raju and Naraynsingh 1989  |
| TUN     | 70     | 2016-2017            | Fattouma Bourguiba University Hospital of Monastir                                                                    | Daldoul 2018               |
| TUN     | 1082   | 2003-2007            | Cancer Registry of the Center of Tunisia                                                                              | Missaoui 2011              |
| TUR     | 18586  | 2005-2017            | National Breast Cancer Registry Program of Turkish Federation of Breast Diseases Societies                            | Ozmen 2019                 |
| TWN     | 29152  | 2004-2008            | Taiwan Cancer Registry                                                                                                | Chiang 2016                |
| TZA     | 74     | 2016-2017            | Muhimbili National Hospital                                                                                           | Mansouri 2019              |
| TZA     | 384    | 2002-2011            | Bugando Medical Center, Mwanza                                                                                        | Mabula 2012                |
| TZA     | 327    | 2007-2009            | Ocean Road Cancer Institute (ORCI)                                                                                    | Burson 2010                |
| UGA     | 194    | 2003-2010            | Kampala Cancer Registry                                                                                               | Menon 2018                 |
| UGA     | 162    | 2014                 | Mulago National Referral Hospital                                                                                     | Odongo 2015                |
| UGA     | 209    | 2014                 | Mulago National Referral Hospital and Ugandan Cancer Institute                                                        | Galukande 2015             |
| URY     | 107    |                      | [Systematic review: de Lemos 2019]                                                                                    | Malvasio 2017              |
| URY     | 109    |                      | [Systematic review: de Lemos 2019]                                                                                    | Camejo 2013                |
| USA     | 293629 | 2010-2016            | SEER                                                                                                                  | SEER 2019                  |
| VEN     | 179    |                      | [Systematic review: de Lemos 2019]                                                                                    | Rebolledo 2012             |
| VEN     | 411    |                      | [Systematic review: de Lemos 2019]                                                                                    | Ferri 2012                 |
| VNM     | 1574   | 2001-2006            | Hue Central Hospital and the Cancer Registry in Ho Chi Minh City                                                      | Lan 2013                   |
| YEM     | 192    | 1998-2002; 2005-2007 | Registry of Algamhouria teaching hospital; Aden public and private hospitals                                          | Harhra 2012                |
| ZAF     | 231    | 2016-2017            | Urban South African open-access breast care clinic                                                                    | Rayne 2019                 |
| ZAF     | 1006   | 2015-2017            | Charlotte Maxeke Johannesburg Academic Hospital and Chris Hani Baragwanath Academic Hospital, Johannesburg            | Phakathi 2019              |
| ZAF     | 586    | 2010-2011            | Tygerberg Hospital, Cape Town                                                                                         | Langenhoven 2016           |
| ZAF     | 1051   | 2006-2012            | Chris Hani Baragwanath Academic Hospital, Soweto, Johannesburg                                                        | Dickens 2014               |

### 1.4.10 Cervical

Stage Data Available – Cervical

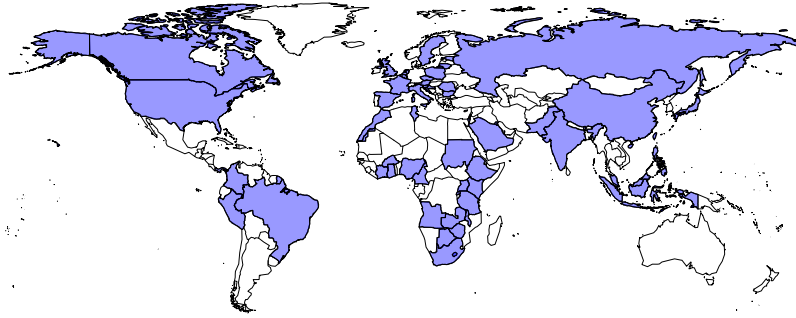

Stage at Diagnosis, Cervical

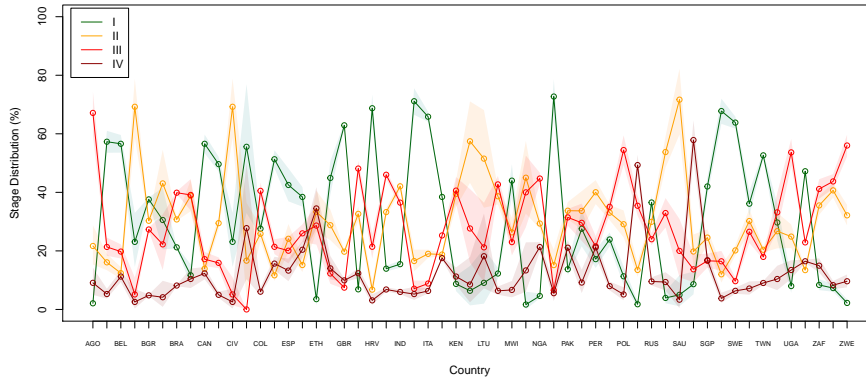

Global: Cervical

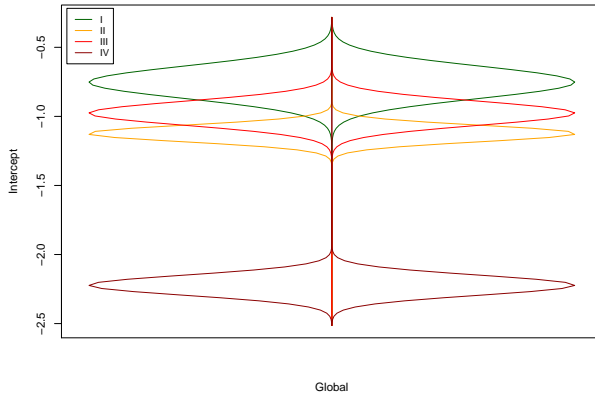

Income Group: Cervical

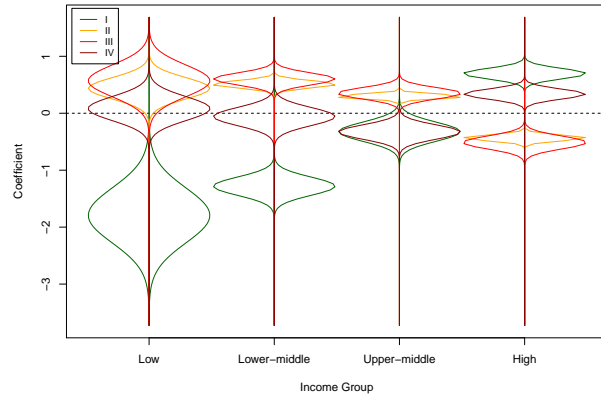

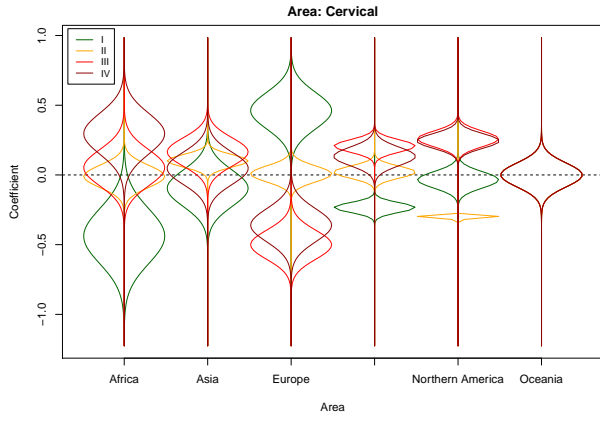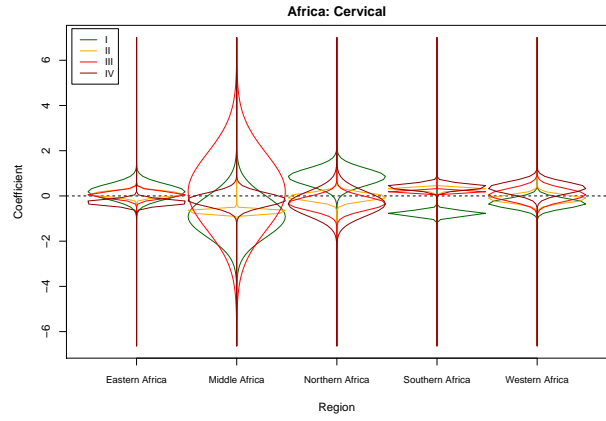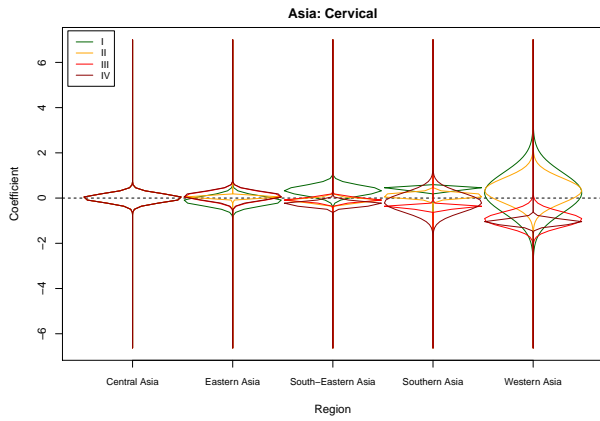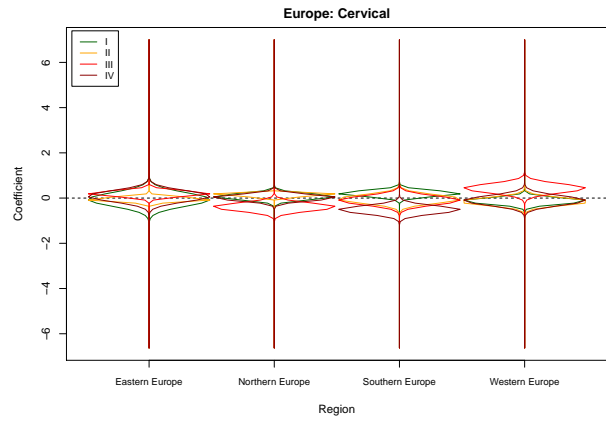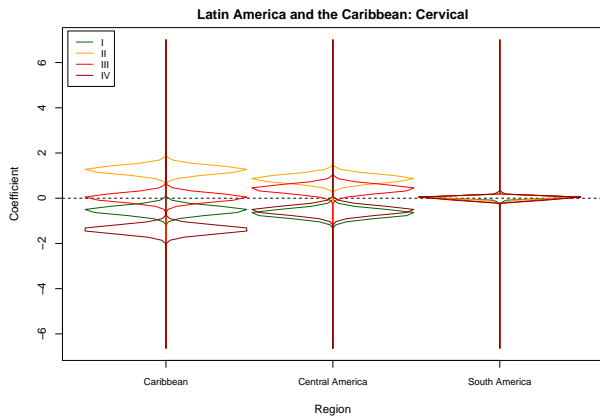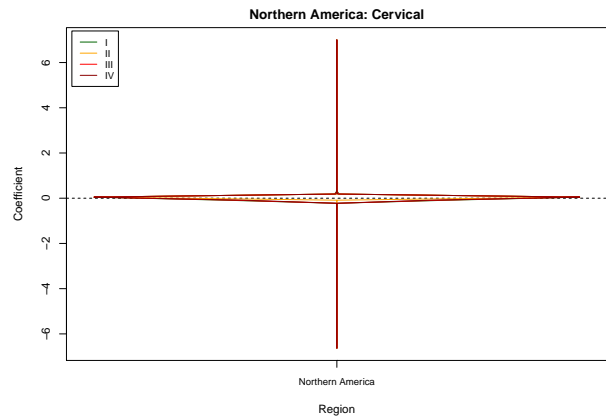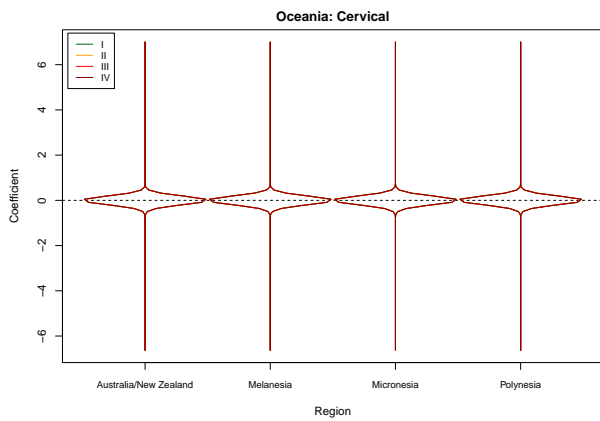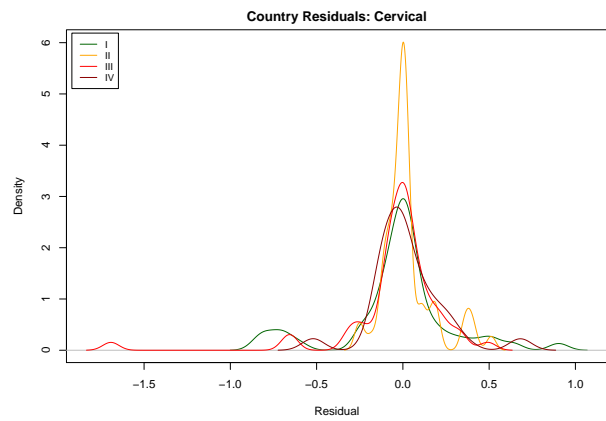

## References

| Country | Cases | Years     | Source                                                                                                                                                                     | Reference                       |
|---------|-------|-----------|----------------------------------------------------------------------------------------------------------------------------------------------------------------------------|---------------------------------|
| AGO     | 143   | 2011      | National Oncology Centre of Luanda                                                                                                                                         | Armando 2015                    |
| AUT     | 665   | 1988-2000 | Cancer Registry of Tyrol                                                                                                                                                   | Oberaigner 2006                 |
| BEL     | 1032  | 2008-2011 | Belgian Cancer Registry                                                                                                                                                    | Silversmit 2017                 |
| BFA     | 78    | 2015-2016 | University Hospital of Yalgado Ouédraogo, Ouagadougou                                                                                                                      | Toure 2017                      |
| BGR     | 20445 | 1993-2013 | Bulgarian Cancer Registry                                                                                                                                                  | Samson 2016                     |
| BHS     | 72    | 2006-2016 | The Cancer Centre Bahamas, in conjunction with Princess Margaret Hospital, Nassau, affiliated with The University of West Indies                                           | Jones 2017                      |
| BRA     | 43567 | 2005-2014 | Hospital-based cancer registry                                                                                                                                             | Vale 2019                       |
| BWA     | 317   | 2010-2015 | Princess Marina Hospital (October 2010 to July 2015), Gaborone Private Hospital (November 2012 to July 2015), and Nyangabgwe Referral Hospital (January 2015 to July 2015) | Dryden-Peterson 2016            |
| CAN     | 926   | 2011-2015 | Canadian Cancer Registry                                                                                                                                                   | Canadian Cancer Statistics 2018 |
| CHN     | 256   | 2017      | Zhongnan Hospital of Wuhan University                                                                                                                                      | Thapa 2018                      |
| CHN     | 1247  | 1993-2008 | Statistics Database of Beijing Cancer Registry (BJCaR)                                                                                                                     | Wang 2015                       |
| CIV     | 78    | 2015-2016 | University hospital of Treichville, Abidjan                                                                                                                                | Toure 2017                      |
| CMR     | 18    | 2012-2017 | Bamenda Regional Hospital, North West Region                                                                                                                               | Nkfusai 2019                    |
| COL     | 1011  | 2007-2012 | Instituto Nacional de Cancerología of Colombia                                                                                                                             | Pardo 2018                      |
| COL     | 95    | 2003-2007 | Manizales population-based Cancer Registry                                                                                                                                 | Arias-Ortiz 2018                |
| CZE     | 996   | 2015      | Modelled estimates based on data from Czech National Cancer Registry                                                                                                       | Dusek 2015                      |
| ESP     | 294   | 2006-2012 | Mallorcan Cancer Registry                                                                                                                                                  | Amengual 2019                   |
| EST     | 804   | 2010-2014 | Estonian Cancer Registry                                                                                                                                                   | Ojamaa 2018                     |
| ETH     | 171   | 2018      | Tikur Anebessa Specialized Hospital (TASH), Addis Ababa                                                                                                                    | Araya 2019                      |
| FRA     | 285   | 1998-2010 | Cote d'Or breast cancer registry                                                                                                                                           | Lorin 2015                      |
| GBR     | 10717 | 2013-2017 | England ONS                                                                                                                                                                | ONS 2019                        |
| GHA     | 1311  | 2010-2013 | Komfo Anokye and Korle Bu Teaching Hospitals                                                                                                                               | Nartey 2016                     |
| HRV     | 355   | 1997-2003 | Clinical Hospital Center Rijeka                                                                                                                                            | Haller 2007                     |
| IDN     | 1303  | 2012-2014 | Cipto Mangunkusumo hospital                                                                                                                                                | Nuranna 2019                    |
| IDN     | 87    | 2013      | Dr. Sardjito hospital, Yogyakarta, Java Island                                                                                                                             | Endarti 2015                    |
| IDN     | 3112  | 2007      | Academic hospitals                                                                                                                                                         | Aziz 2009                       |
| IDN     | 282   | 2013-2017 | Sanglah General Hospital, Bali                                                                                                                                             | Prabawa 2019                    |
| IND     | 423   | 2012-2014 | Trivandrum District population-based cancer registry                                                                                                                       | Mathew 2019                     |
| IND     | 272   | 2015-2017 | Indira Gandhi Institute of Medical Sciences, Patna, Bihar                                                                                                                  | Kumari 2018                     |
| IND     | 140   | 2010-2013 | Rural/suburban area of western India                                                                                                                                       | Singh 2016                      |
| IND     | 193   | 2010      | Hospital-based cancer registry of a regional cancer center in the NE India                                                                                                 | Kataki 2018                     |
| IND     | 190   | 2010-2011 | Hospital registry of Malabar Cancer Centre, Kerala                                                                                                                         | Bindu 2017                      |
| IND     | 172   | 2010-2012 | Cancer registry of a regional cancer centre in Kamrup, North Eastern India                                                                                                 | Krishnatreya 2015               |
| IND     | 1051  | 2010-2012 | Hospital-based cancer registry of a regional cancer center of North-East India                                                                                             | Krishnatreya 2014               |
| IND     | 927   | 2000-2009 | Departments of Pathology and Gynecology, at a tertiary care center, Delhi                                                                                                  | Agarwal 2012                    |
| ISR     | 381   | 2002-2004 | Israel National Cancer Registry                                                                                                                                            | Kogan 2011                      |
| ITA     | 2927  | 2005      | Italian Network of Cancer Registries                                                                                                                                       | Ricciardi 2009                  |
| JPN     | 24101 | 2012-2015 | Nationwide hospital-based cancer registries                                                                                                                                | Okuyama 2018                    |
| KEN     | 81    | 2017      | Kenyatta National Hospital, Nairobi                                                                                                                                        | Degu 2017                       |
| KEN     | 355   | 2008-2010 | Kenyatta National Hospital, Nairobi                                                                                                                                        | Maranga 2013                    |
| KWT     | 47    | 1995-1999 | Kuwait Cancer Control Center                                                                                                                                               | Abuzallouf 2008                 |
| LTU     | 33    | 2017-2018 | Department of Obstetrics and Gynaecology, Hospital of Lithuanian University of Health Sciences                                                                             | Vitkauskaitė 2019               |
| MAR     | 645   | 2006      | National Institute of Oncology of Rabat and Casablanca cancer center                                                                                                       | Elmajjaoui 2016                 |
| MAR     | 350   | 2000-2010 | National cancer institute of Morocco                                                                                                                                       | Khalil 2015                     |
| MAR     | 138   | 2005-2010 | Mohamed V Military Hospital, Rabat                                                                                                                                         | Elmarjany 2015                  |
| MWI     | 300   | 2015      | Queen Elizabeth Central Hospital (QECH), in Southern Malawi                                                                                                                | Rudd 2017                       |
| MYS     | 60    | 2001-2008 | University of Malaya Medical Centre                                                                                                                                        | Zamaniah 2014                   |
| NGA     | 20    | 2016      | Lagos University Teaching Hospital (LUTH)                                                                                                                                  | Awofeso 2018                    |
| NGA     | 75    | 2008-2012 | Port Harcourt Teaching Hospital (UPTH), Port Harcourt                                                                                                                      | Goddy 2015                      |
| NGA     | 36    | 1998-2003 | National Hospital, Abuja (NHA)                                                                                                                                             | Umezulike 2007                  |
| NGA     | 248   | 2009-2011 | Obstetrics and Gynaecology outpatient theatre, University College Hospital, Ibadan                                                                                         | Awolude 2018                    |
| NGA     | 1467  | 2012-2016 | Radiotherapy and Oncology Centre of Ahmadu Bello University Teaching Hospital, Zaria                                                                                       | Abdullahi 2018                  |
| NGA     | 65    | 2011-2013 | Jos University Teaching Hospital (JUTH)                                                                                                                                    | Musa 2016                       |
| NGA     | 41    | 2005-2010 | Ebonyi State University Teaching Hospital (EBSUTH)                                                                                                                         | Eze 2013                        |
| NGA     | 267   | 2005-2009 | Ahmadu Bello University Teaching Hospital, Zaria                                                                                                                           | Oguntayo 2011                   |
| NGA     | 149   | 1990-1999 | University of Ilorin Teaching Hospital, Ilorin                                                                                                                             | Ijaiya 2004                     |
| NLD     | 198   | 1992-2001 | Comprehensive Cancer Centre Stedendriehoek Twente                                                                                                                          | van der Aa 2008                 |

(continued)

| Country | Cases | Years     | Source                                                                                                       | Reference           |
|---------|-------|-----------|--------------------------------------------------------------------------------------------------------------|---------------------|
| PAK     | 56    | 2009      | Nuclear Institute of Medicine and Radiotherapy (NIMRA)                                                       | Aziz 2013           |
| PAK     | 331   | 1994-2004 | Shaukat Khanum Memorial Cancer Hospital and Research Center (SKMCH & RC), Lahore                             | Badar 2007          |
| PAK     | 618   | 1991-2000 | Institute of Nuclear Medicine and Oncology, Lahore (INMOL)                                                   | Parveen 2006        |
| PAN     | 196   | 1986-1987 | National Oncology Institute                                                                                  | DeBritton 1993      |
| PER     | 547   | 2008-2002 | Instituto Nacional de Enfermedades Neoplásicas                                                               | Ruiz 2017           |
| PHL     | 1255  | 1993-2002 | Philippine Cancer Society-Manila Cancer Registry and the Department of Health-Rizal Cancer Registry          | Redaniel 2009       |
| POL     | 371   | 2009-2017 | Not reported                                                                                                 | Cegla 2019          |
| ROU     | 734   | 2008-2017 | Arad County Cancer Registry                                                                                  | Tataru 2019         |
| RUS     | 1664  | 2000-2014 | Arkhangel'sk Regional Cancer Registry (Northwest Russia)                                                     | Grjibovski 2018     |
| RWA     | 331   | 2012-2015 | Butaro Cancer Center of Excellence                                                                           | Park 2018           |
| SAU     | 60    | 2004-2010 | King Faisal Specialist Hospital and Research Center, Jeddah and King Abdulaziz University Hospital, Jeddah   | El Sayed 2017       |
| SDN     | 197   | 2007      | Radiation and Isotopes Centre in Khartoum                                                                    | Ibarhim 2011        |
| SGP     | 933   | 2011-2015 | Singapore Cancer Registry                                                                                    | Annual Report, 2017 |
| SVN     | 450   | 2003-2005 | Institute of Oncology Ljubljana, the University Medical Center in Ljubljana, and Maribor University Hospital | Takac 2008          |
| SWE     | 2093  | 2011-2015 | Swedish Quality Registry for Gynecologic Cancer                                                              | Bjurberg 2019       |
| TUN     | 112   | 2010-2012 | Salah Azeiz Oncology Institute (SAI), Tunis                                                                  | Zidi 2016           |
| TUN     | 378   | 1993-2006 | Cancer Registry of the center of Tunisia                                                                     | Missaoui 2010       |
| TWN     | 6626  | 2004-2008 | Taiwan Cancer Registry                                                                                       | Chiang 2016         |
| TZA     | 202   | 2013-2014 | Bugando Medical Centre                                                                                       | Mlange 2016         |
| UGA     | 278   | 2003-2010 | Kampala Cancer Registry                                                                                      | Menon 2018          |
| UGA     | 144   | 2012-2014 | St Mary's Hospital Lacor, northern Uganda                                                                    | Mwaka 2016          |
| UGA     | 16    | 2012-2013 | private-not-for-profit (PNFP) and a public Regional Referral Hospital, both in Gulu, northern Uganda         | Mwaka 2015          |
| USA     | 17431 | 2010-2016 | SEER                                                                                                         | SEER 2019           |
| ZAF     | 836   | 1997-1998 | Johannesburg Hospital                                                                                        | Lomalisa 2000       |
| ZMB     | 1507  | 2007-2012 | Hospitals in Lusaka and Southern and Western provinces                                                       | Kalima 2015         |
| ZWE     | 675   | 1998-2010 | Parirenyatwa Oncology and Radiotherapy Centre, Harare                                                        | Mushosho 2011       |

### 1.4.11 Prostate

Stage Data Available – Prostate

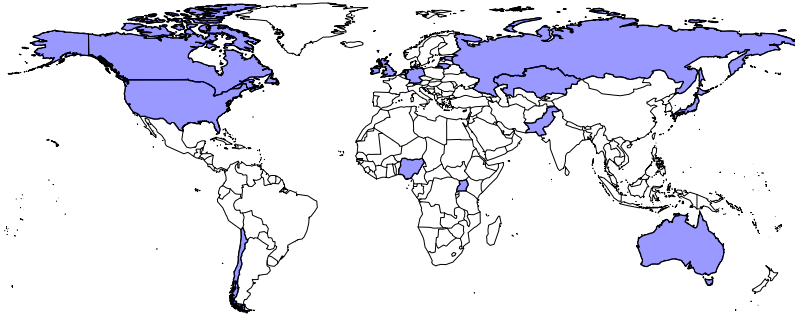

Stage at Diagnosis, Prostate

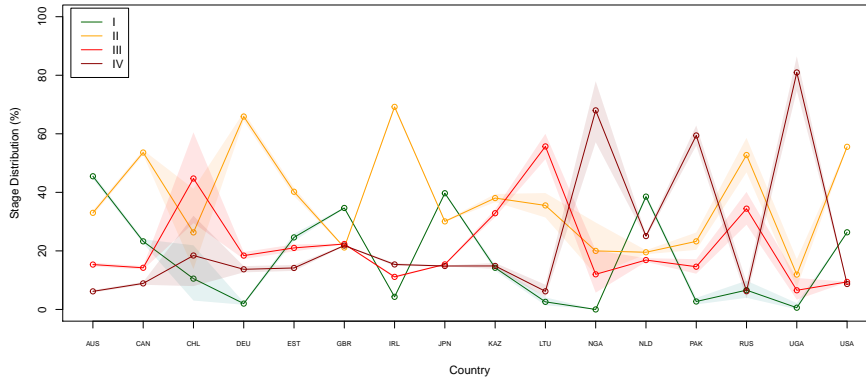

Global: Prostate

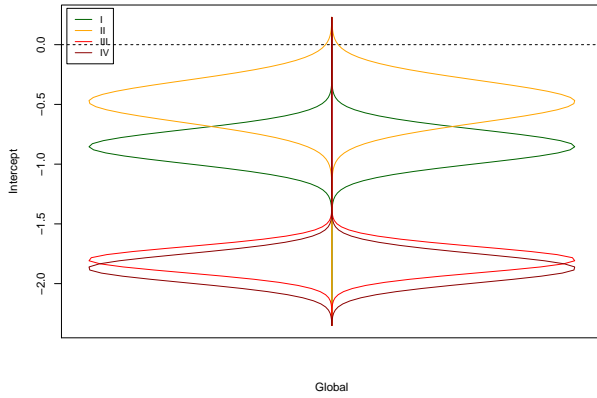

Income Group: Prostate

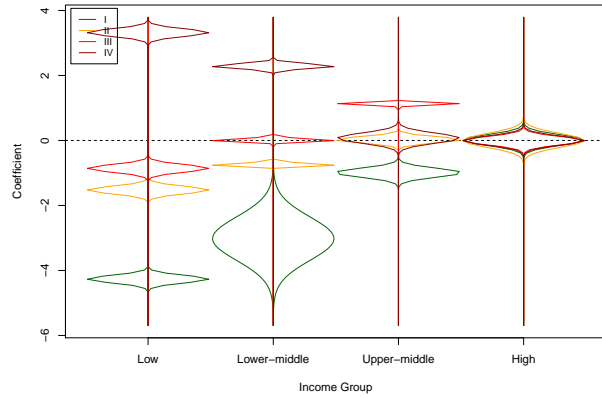

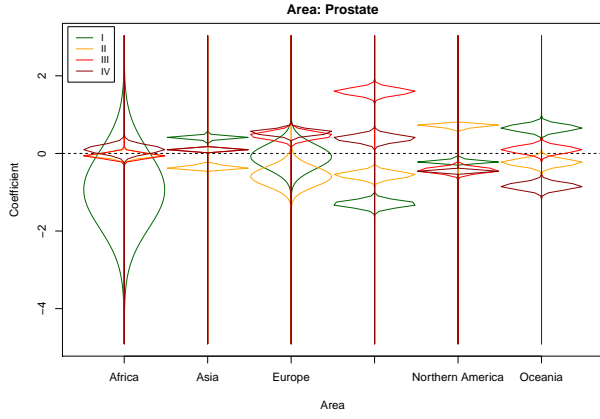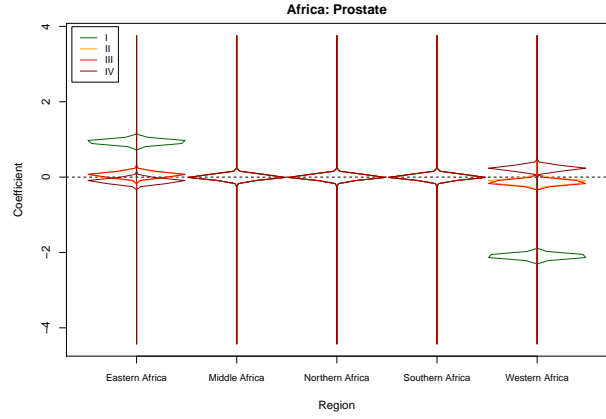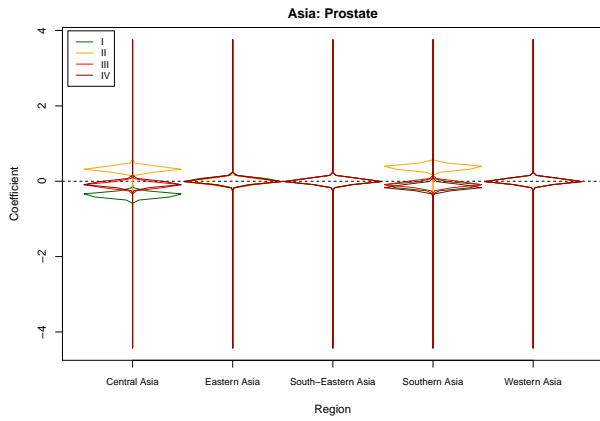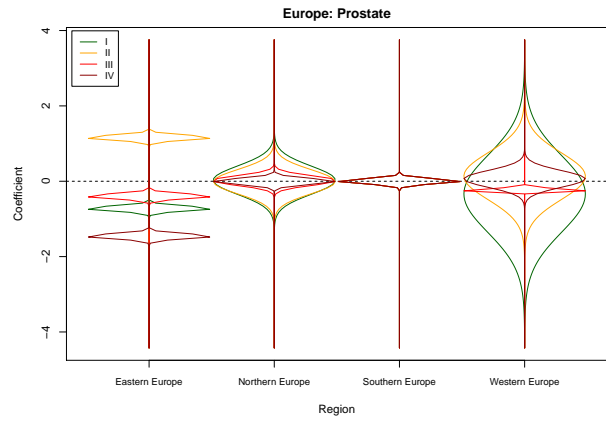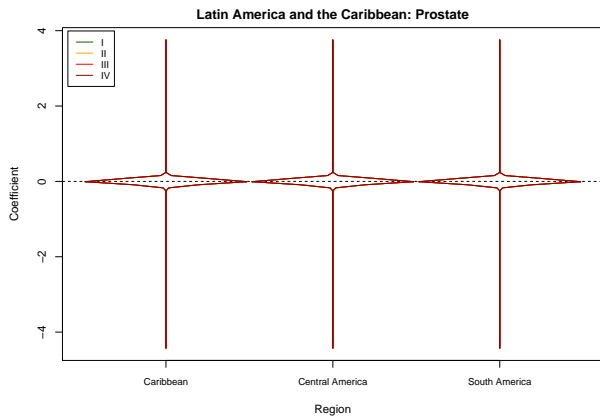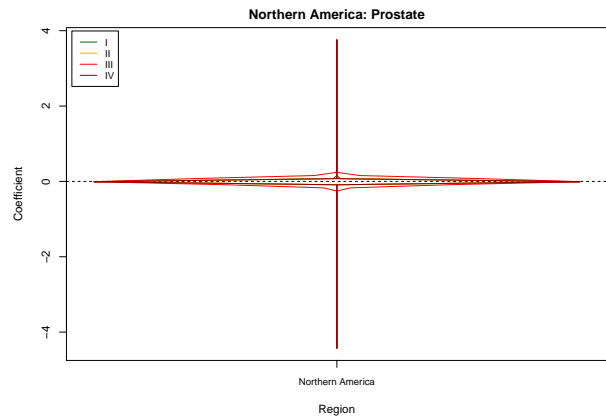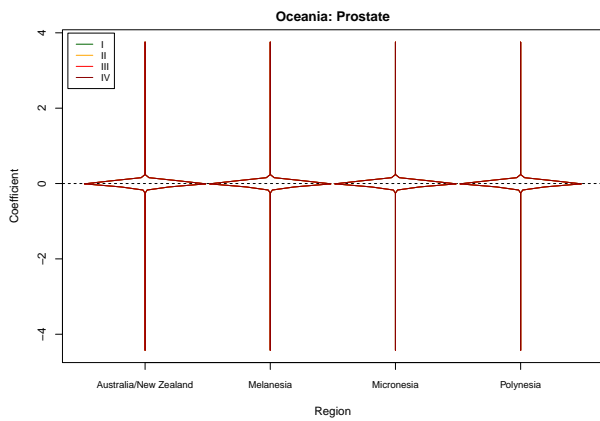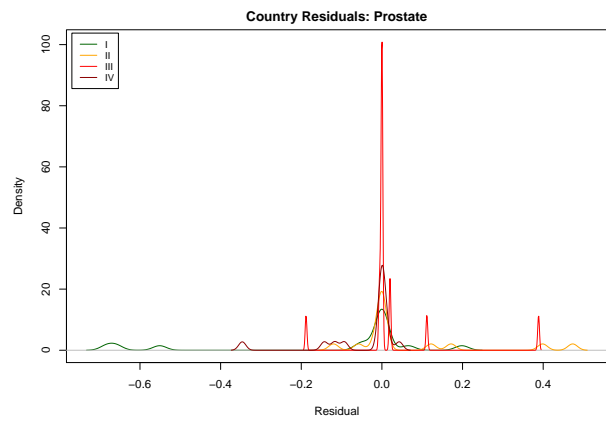



## References

| Country | Cases  | Years        | Source                                                                                                                                                                                                                                                                     | Reference                       |
|---------|--------|--------------|----------------------------------------------------------------------------------------------------------------------------------------------------------------------------------------------------------------------------------------------------------------------------|---------------------------------|
| AUS     | 5064   | 2017         | Victoria Cancer Registry                                                                                                                                                                                                                                                   | Victoria Cancer Registry 2019   |
| AUS     | 6946   | 2011         | New South Wales Cancer Registry                                                                                                                                                                                                                                            | Lawrance 2019                   |
| CAN     | 13345  | 2011-2015    | Canadian Cancer Registry                                                                                                                                                                                                                                                   | Canadian Cancer Statistics 2018 |
| CHL     | 38     | Not Reported | Not Reported                                                                                                                                                                                                                                                               | Rivera 2003                     |
| DEU     | 3909   | 2004-2005    | Cancer Registry Schleswig-Holstein                                                                                                                                                                                                                                         | Rohde 2009                      |
| EST     | 4510   | 2010-2014    | Estonian Cancer Registry                                                                                                                                                                                                                                                   | Innos 2017                      |
| GBR     | 179327 | 2013-2017    | England ONS                                                                                                                                                                                                                                                                | ONS 2019                        |
| IRL     | 20244  | 1998-2009    | National Cancer Registry Ireland                                                                                                                                                                                                                                           | Burns 2014                      |
| JPN     | 152749 | 2012-2015    | Nationwide hospital-based cancer registries                                                                                                                                                                                                                                | Okuyama 2018                    |
| KAZ     | 4597   | 2013-2015    | Kazakhstan Cancer Registry                                                                                                                                                                                                                                                 | Ishkinin 2017                   |
| LTU     | 501    | 2010-2011    | Six hospitals: Institute of Oncology of Vilnius University, the Hospital of Lithuanian University of Health Sciences, Oncology Hospital of Lithuanian University of Health Sciences, Klaipėda University Hospital, Šiauliai County Hospital, and Panevėžys County Hospital | Mickeviciene 2013               |
| NGA     | 75     | 2001-2010    | Department of Radiotherapy, Lagos University Teaching Hospital (LUTH)                                                                                                                                                                                                      | Adewumi 2016                    |
| NLD     | 12974  | 2015-2016    | Netherlands Cancer Registry                                                                                                                                                                                                                                                | Walraven 2019                   |
| PAK     | 774    | 2004-2012    | Shaukat Khanum Memorial Cancer Hospital and Research Centre, Lahore                                                                                                                                                                                                        | Badar 2015                      |
| RUS     | 273    | 2008-2010    | N. N. Blokhin Russian Cancer Research Center RAMS and the A.I. Kryzhanivskiy Krasnoyarsk Regional Oncology Center                                                                                                                                                          | Oskina 2014                     |
| UGA     | 168    | 2012         | Uganda Cancer Institute                                                                                                                                                                                                                                                    | Okuku 2016                      |
| USA     | 262231 | 2010-2016    | SEER                                                                                                                                                                                                                                                                       | SEER 2019                       |

## 1.5 Maximum Achievable Survival

We based our priors for maximum achievable survival on reported stage-specific survival for SEER cases diagnosed in 2010-2016. We used estimates of 5-year relative survival.

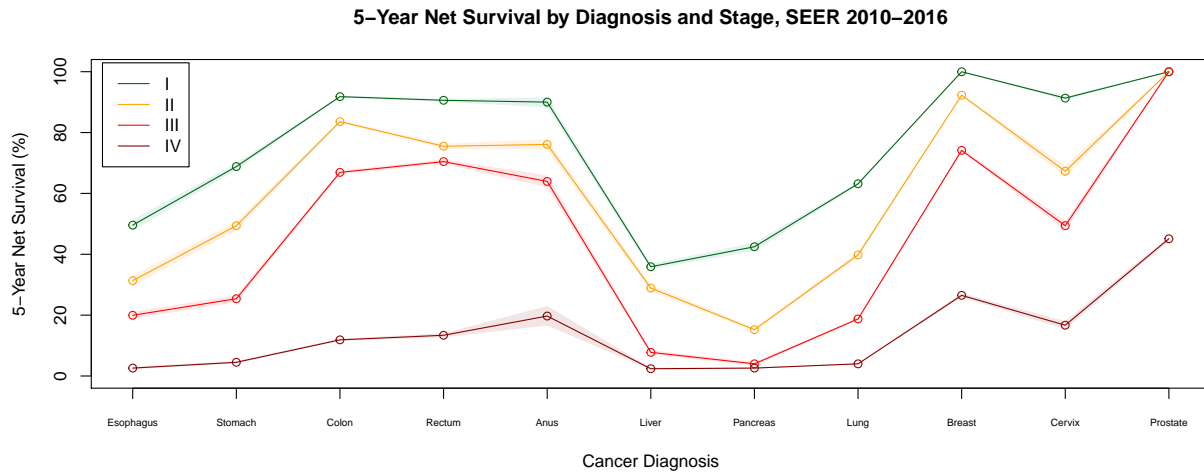

We inflated these priors by 3 percentage points (up to maximum of 100%) to account for the potential for non-optimal service delivery in the US. When sampling we enforced constraints to ensure that survival was non-increasing by stage.

Reference:

Surveillance, Epidemiology, and End Results (SEER) Program ([www.seer.cancer.gov](http://www.seer.cancer.gov)) SEER\*Stat Database: Incidence - SEER 18 Regs Research Data + Hurricane Katrina Impacted Louisiana Cases, Nov 2018 Sub (2000-2016) - Linked To County Attributes - Total U.S., 1969-2017 Counties, National Cancer Institute, DCCPS, Surveillance Research Program, released April 2019, based on the November 2018 submission.

## 1.6 Treatment Benefits

To set prior probability distributions for the impact of treatment and imaging modalities on stage-specific cancer survival we used a survey to elicit expert opinion. Respondents were asked to indicate the impact of each treatment/imaging modality on five-year survival for each cancer and stage. Response descriptions are as follows:

| Impact on survival        | Description                                                      |
|---------------------------|------------------------------------------------------------------|
| 1 No impact/not indicated | Not expected to affect 5-yr survival at all                      |
| 2 Small impact            | May improve the probability of 5-yr survival in some cases       |
| 3 Moderate impact         | Likely to improve the probability of 5-yr survival in most cases |
| 4 Necessary               | Use is necessary to achieve 5-yr survival                        |

As a simplifying assumption, expert opinion responses for treatment impacts were based on recommended treatment for patients at first presentation. Similarly, survey responses regarding imaging are limited to initial staging. These expert opinion results thus reflect best contemporary care for patients initially diagnosed at different stages of cancer.

### 1.6.1 Survey Participants

#### Imaging

| Participant                | Institution                                                |
|----------------------------|------------------------------------------------------------|
| Prof Alex Pitman           | Northern Beaches Hospital, Sydney, Australia               |
| Dr Shanker Ramdave         | Monash Medical Centre, Melbourne, Australia                |
| A/Prof Sze Ting Lee        | Austin Health, Melbourne, Australia                        |
| A/Prof Eddie Lau           | Austin Health, Melbourne, Australia                        |
| Prof Henry Bom             | Chonam National University, Chonam, Korea                  |
| Prof Jun Hatazawa          | Osaka University Graduate School of Medicine, Osaka, Japan |
| Dr Raef Boktor             | Austin Health, Melbourne, Australia                        |
| Prof Pek-Lan Khong         | University of Hong Kong, Hong Kong                         |
| Prof William MacDonald     | Fiona Stanley Hospital, Perth, Australia                   |
| Prof Guy Frija             | Paris Georges European Hospital, Paris, France             |
| Prof Geraldine McGinty     | Weill Cornell Medicine, New York, USA                      |
| Prof Luis Donoso-Bach      | Hospital Clinic of Barcelona, Barcelona, Spain             |
| Prof James Brink           | Massachusetts General Hospital, Boston, USA                |
| Prof Heinz-Peter Schlemmer | German Cancer Research Center, Heidelberg, Germany         |
| Prof Christin Herold       | Medical University of Vienna, Vienna, Austria              |
| Prof Gabriel Krestin       | Erasmus MC, University Medical Center, Rotterdam, NL       |
| Prof Giles Boland          | Brigham and Women's Health, Boston, USA                    |
| Prof Marius Mayerhoefer    | University of Vienna, Vienna, Austria                      |
| Dr Miriam Mikhail Lette    | International Atomic Energy Agency, Vienna, Austria        |
| Dr Diana Paez              | International Atomic Energy Agency, Vienna, Austria        |
| Dr Joshua Chaim            | Memorial Sloan Kettering Cancer Center, NY, USA            |
| Dr Richard Do              | Memorial Sloan Kettering Cancer Center, NY, USA            |
| Dr Scott Gerst             | Memorial Sloan Kettering Cancer Center, NY, USA            |
| Dr Hedvig Hricak           | Memorial Sloan Kettering Cancer Center, NY, USA            |
| Dr Maria Lagratta          | Memorial Sloan Kettering Cancer Center, NY, USA            |
| Dr Robert Lefkowitz        | Memorial Sloan Kettering Cancer Center, NY, USA            |
| Dr Peter Sawan             | Memorial Sloan Kettering Cancer Center, NY, USA            |
| Dr H. Alberto Vargas       | Memorial Sloan Kettering Cancer Center, NY, USA            |
| Dr Andreas Wibmer          | Memorial Sloan Kettering Cancer Center, NY, USA            |
| Prof Regina Beets-Tan      | The Netherlands Cancer Institute, Amsterdam, Netherlands   |

| Participant         | Institution                                        |
|---------------------|----------------------------------------------------|
| Prof David Bonekamp | German Cancer Research Center, Heidelberg, Germany |
| Prof Stefan Delorme | German Cancer Research Center, Heidelberg, Germany |
| Dr Melvin Danastasi | Mater Dei Hospital, Msida, Malta                   |
| Prof Daniele Regge  | Candiolo Cancer Institute, Torino                  |

## Therapy

| Participant              | Institution                                           |
|--------------------------|-------------------------------------------------------|
| A/Prof Andrew Weickhardt | Austin Health, Melbourne, Australia                   |
| Prof Farshad Foroudi     | Austin Health, Melbourne, Australia                   |
| Prof Hui Gan             | Austin Health, Melbourne, Australia                   |
| Dr Siddarth Menon        | Austin Health, Melbourne, Australia                   |
| Dr Umbreen Hafeez        | Austin Health, Melbourne, Australia                   |
| A/Prof Eliza Hawkes      | Austin Health, Melbourne, Australia                   |
| Dr David Chang           | Austin Health, Melbourne, Australia                   |
| Dr Sagun Parakh          | Austin Health, Melbourne, Australia                   |
| Dr George Iatropoulos    | Austin Health, Melbourne, Australia                   |
| Dr Richard Khor          | Austin Health, Melbourne, Australia                   |
| Dr May Abdel Wahab       | International Atomic Energy Agency, Vienna, Austria   |
| Dr Nadeem Abu-Rustum     | Memorial Sloan Kettering Cancer Center, New York, USA |
| Dr Peter Kingham         | Memorial Sloan Kettering Cancer Center, New York, USA |
| Dr Oren Cahlon           | Memorial Sloan Kettering Cancer Center, New York, USA |
| Dr Karim Toujier         | Memorial Sloan Kettering Cancer Center, New York, USA |
| Dr Diane Reidy           | Memorial Sloan Kettering Cancer Center, New York, USA |
| Dr Marty Weiser          | Memorial Sloan Kettering Cancer Center, New York, USA |
| Dr Vin Laudone           | Memorial Sloan Kettering Cancer Center, New York, USA |
| Dr Tim Donahue           | Memorial Sloan Kettering Cancer Center, New York, USA |
| Dr Oliver Zivanovic      | Memorial Sloan-Kettering Cancer Center, New York, USA |
| Dr Surbhi Grover         | University of Pennsylvania, Pennsylvania, USA         |

## 1.6.2 Survey Responses

### 1.6.2.1 Chemotherapy

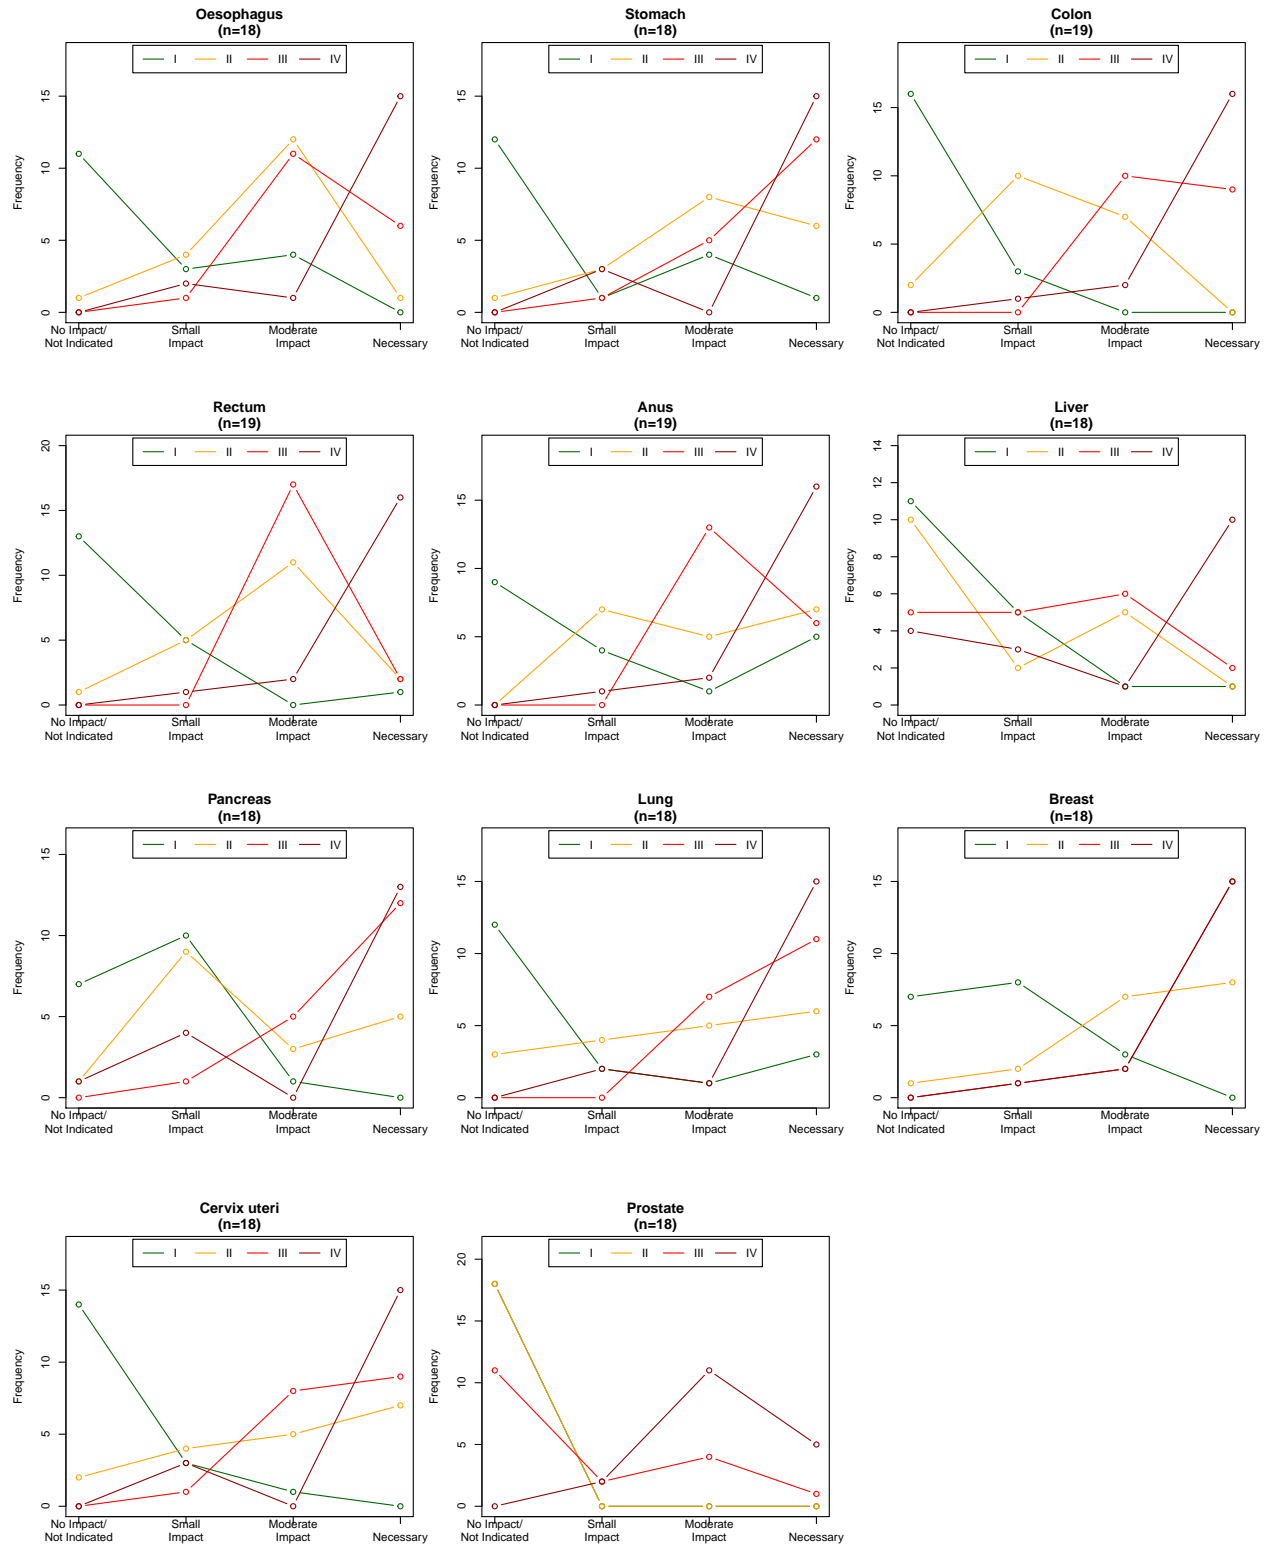

### 1.6.2.2 Radiotherapy

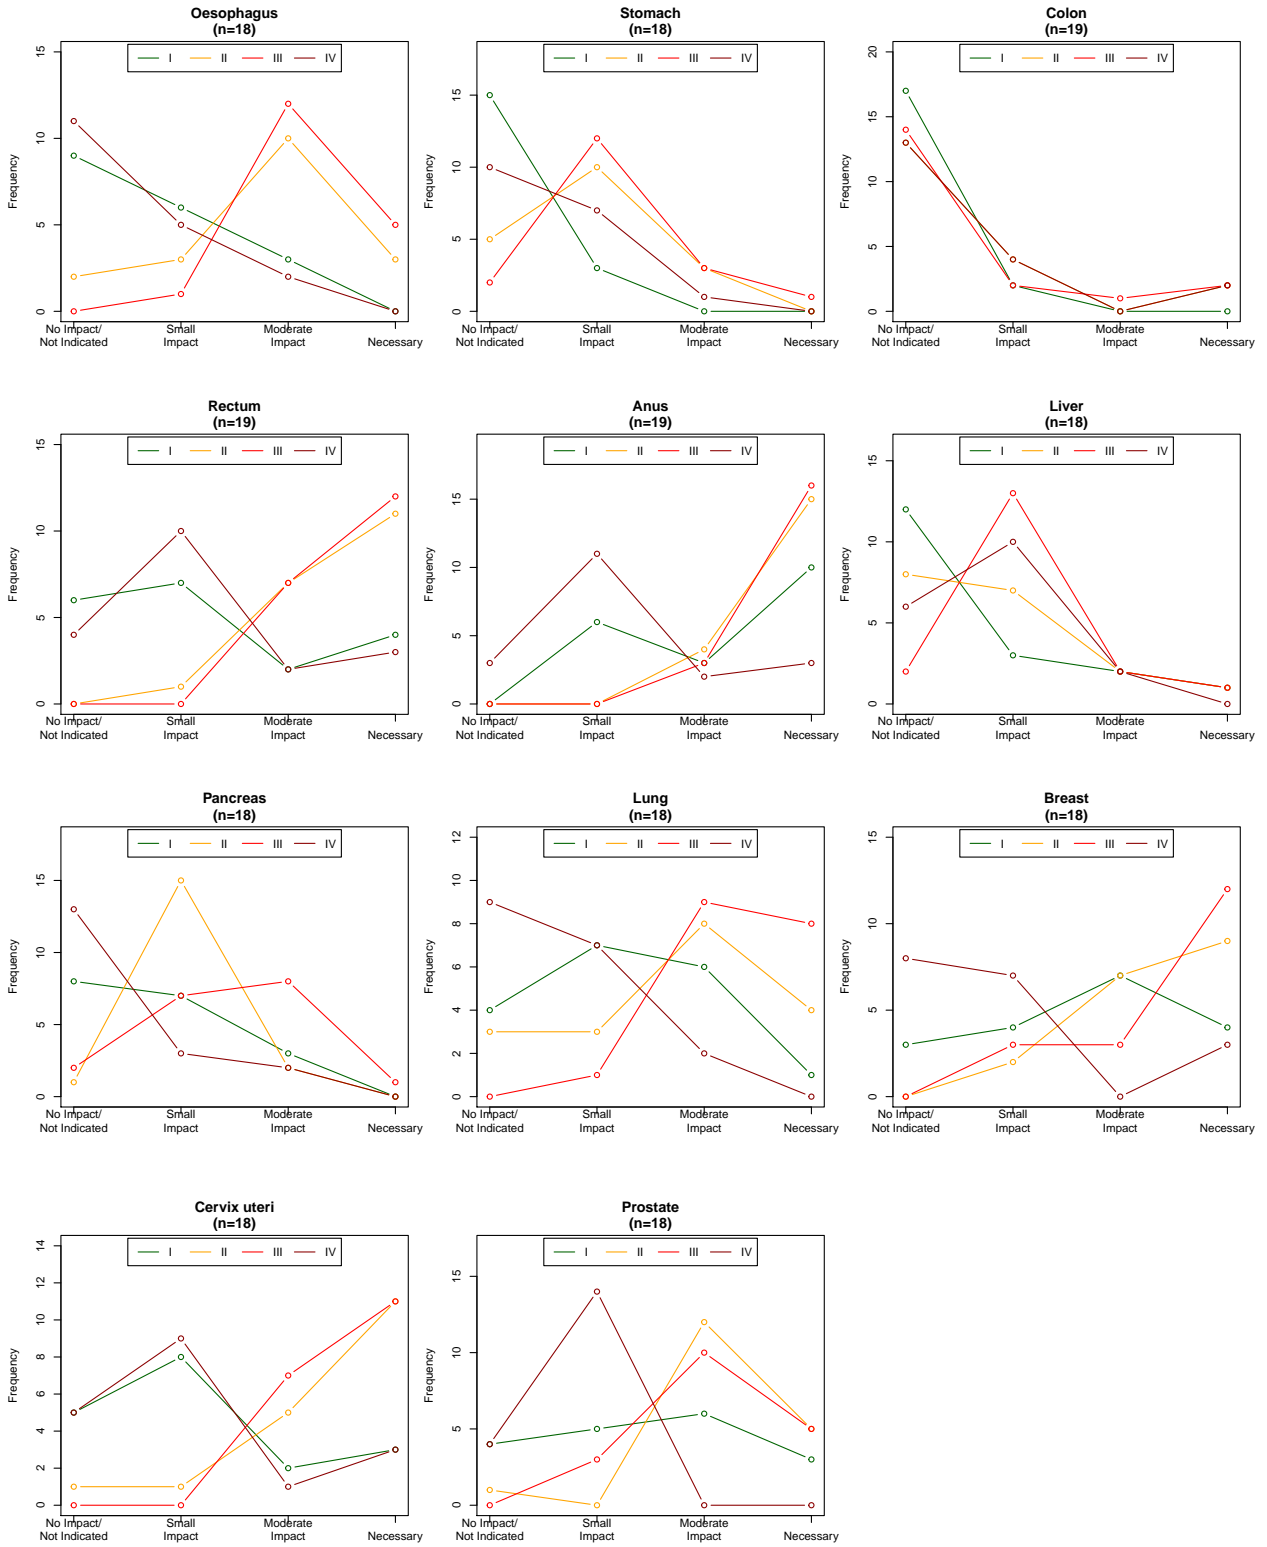

### 1.6.2.3 Surgery

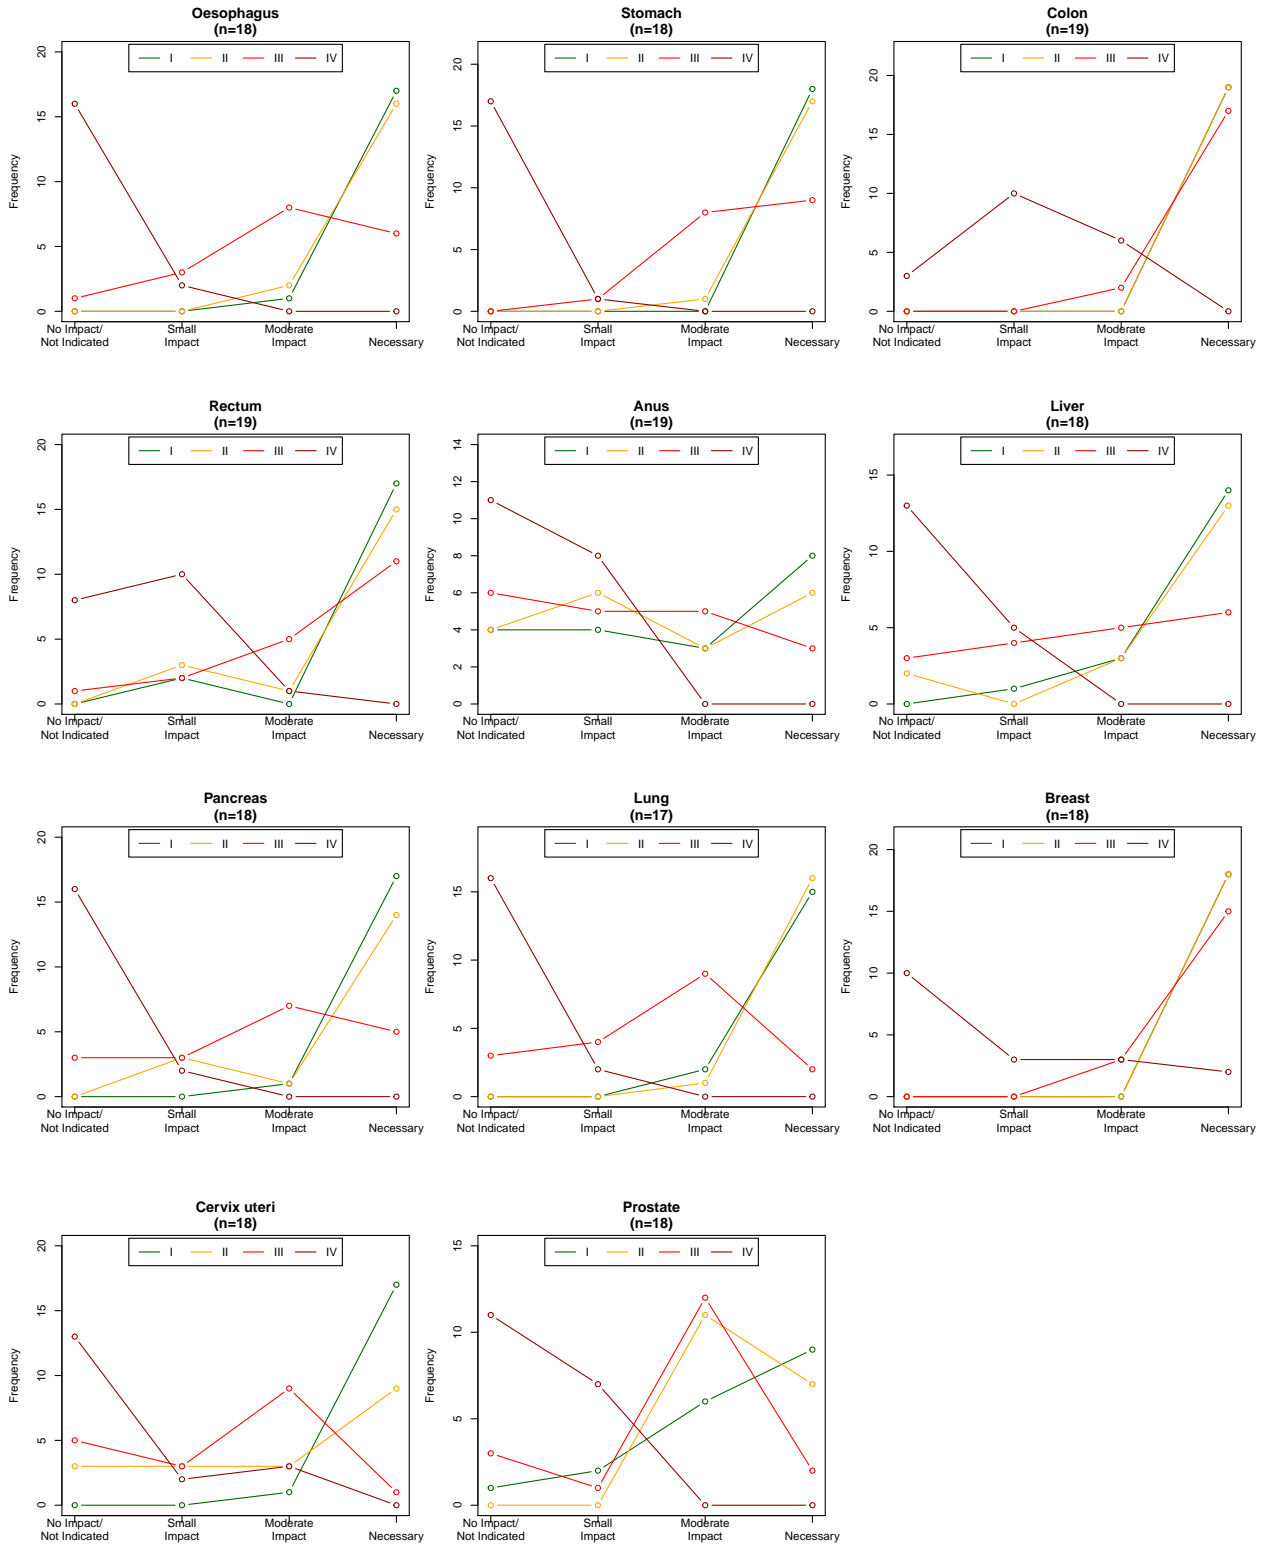

### 1.6.2.4 Targeted Therapy

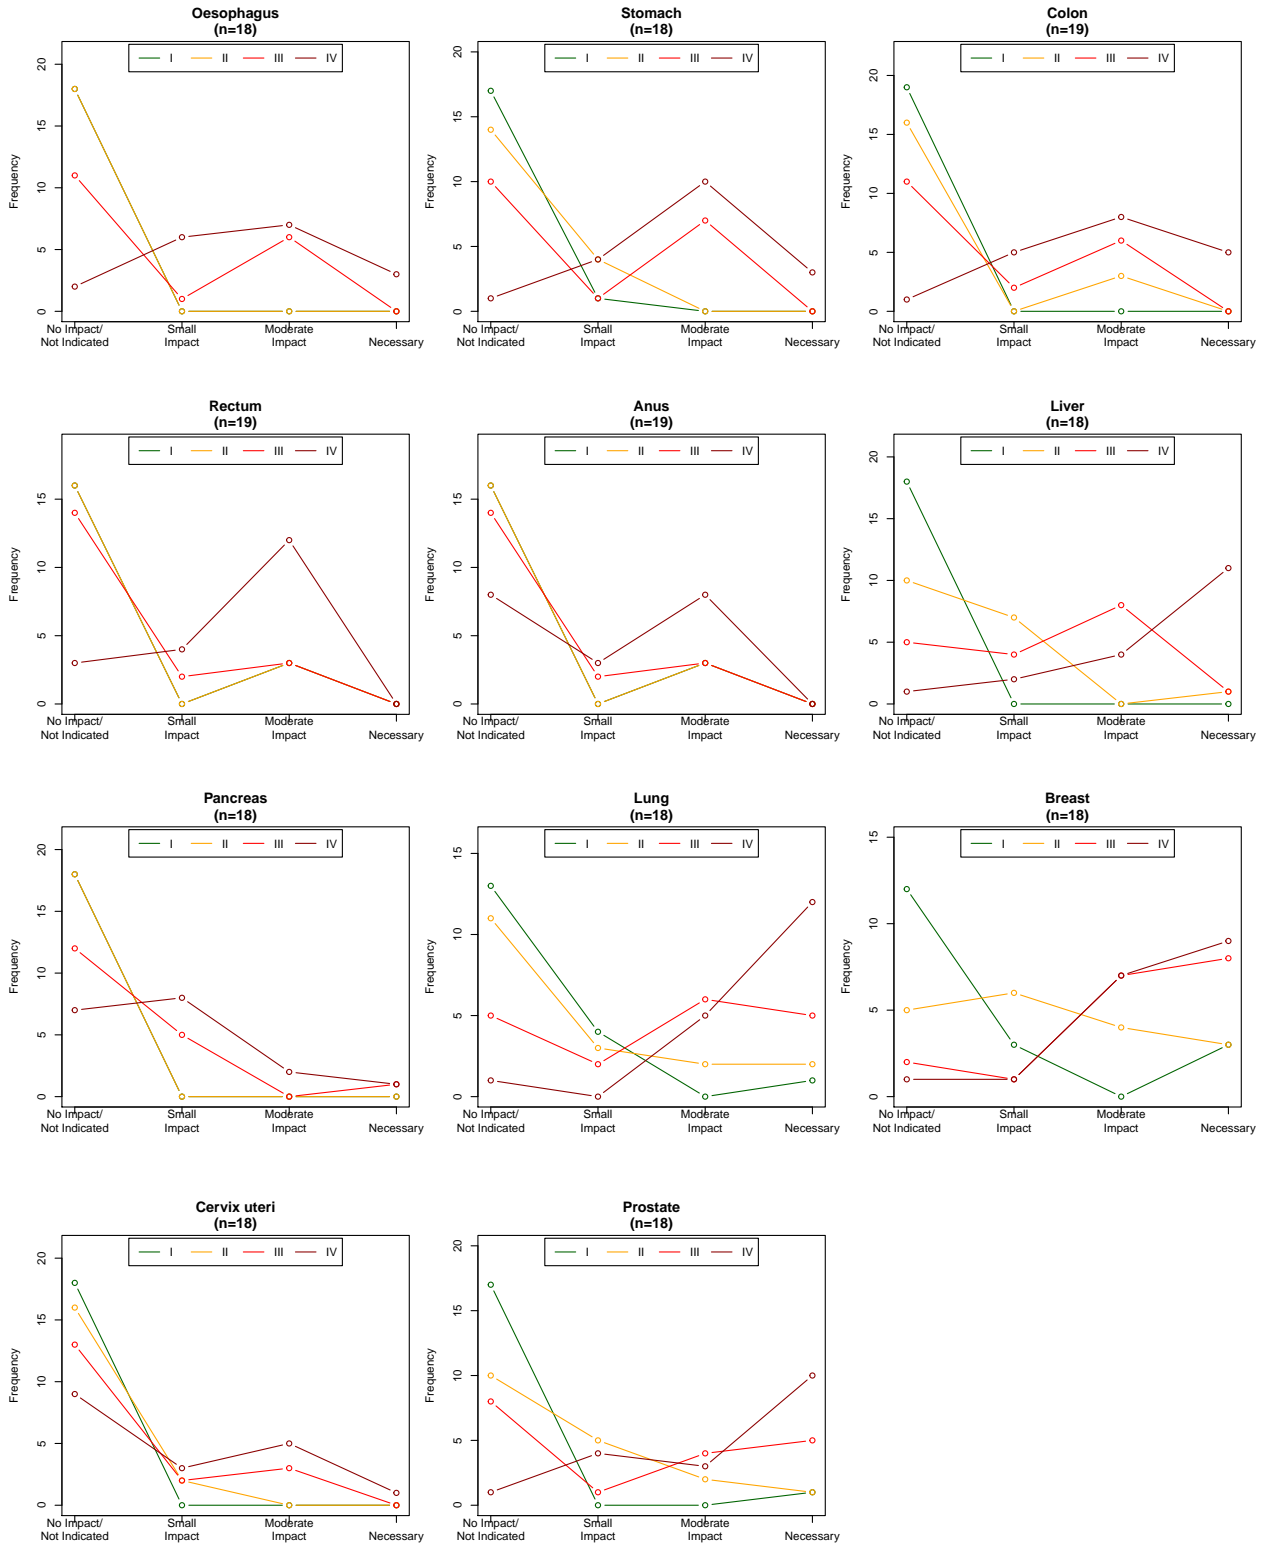



### 1.6.2.5 Ultrasound

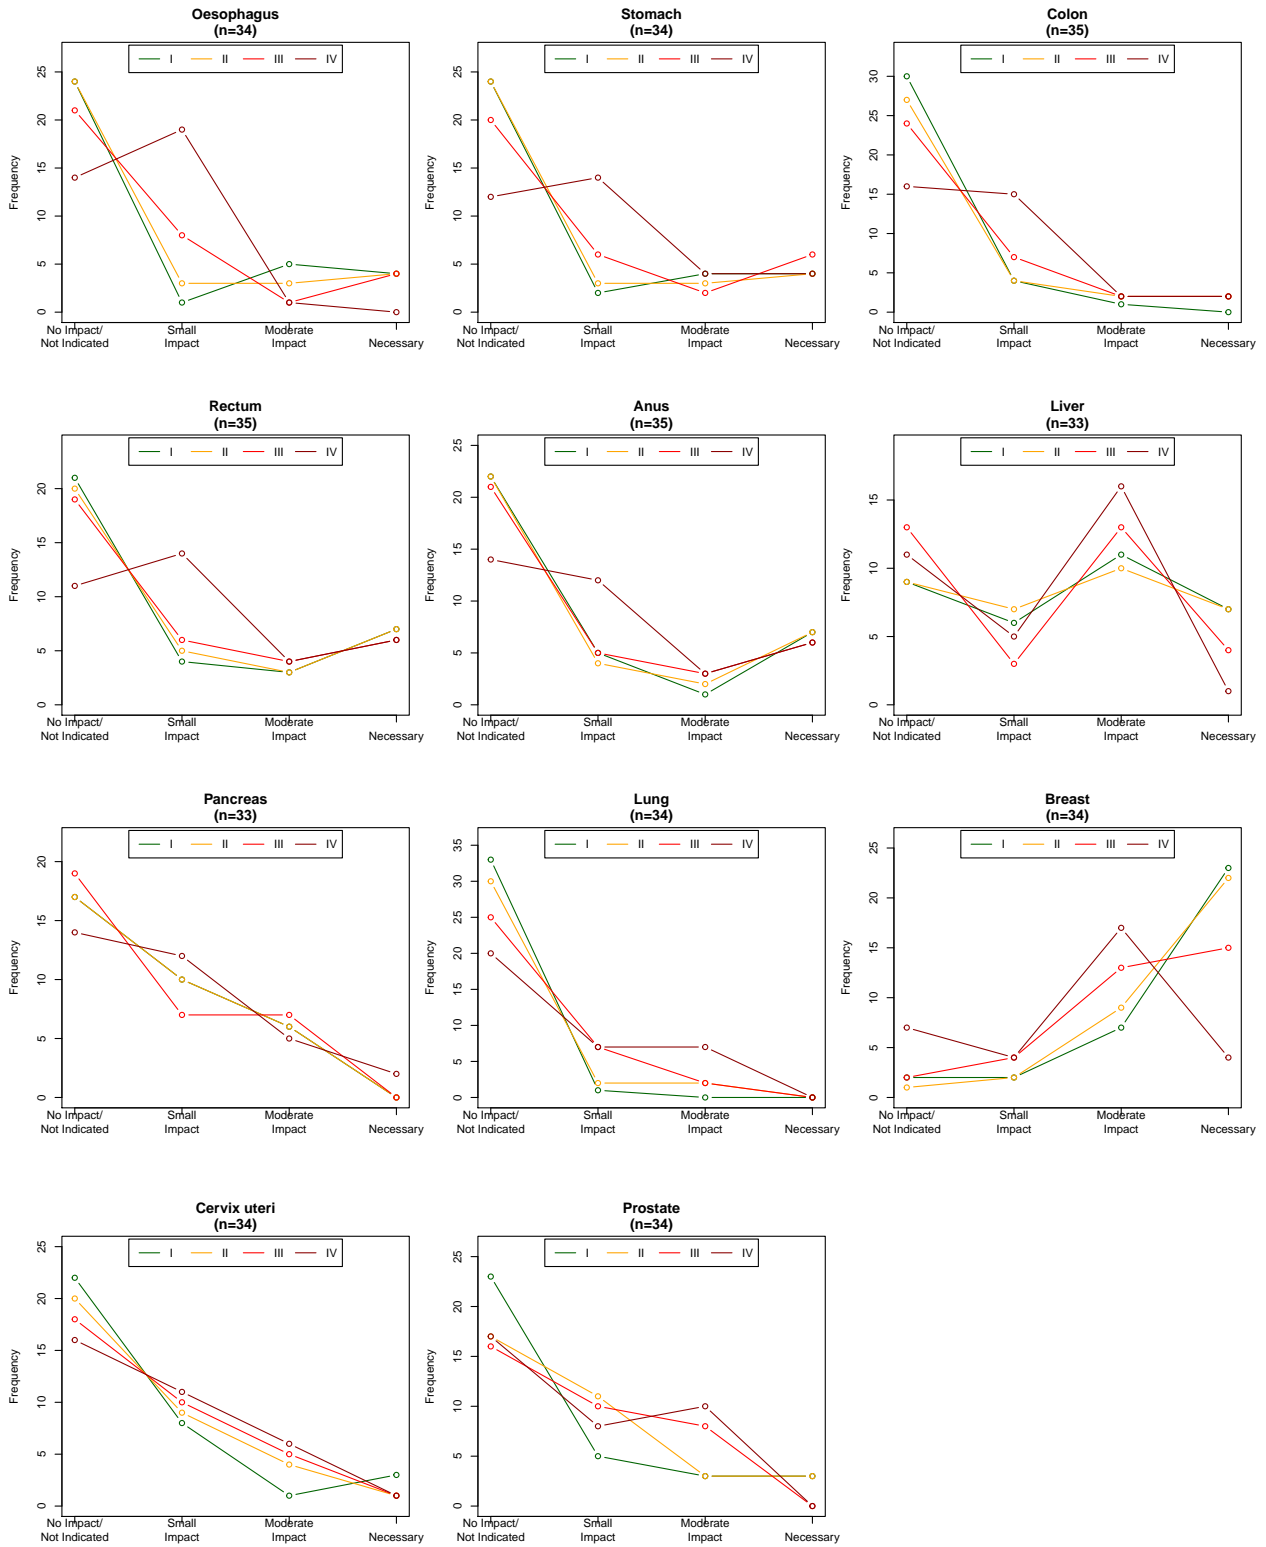

### 1.6.2.6 X-Ray

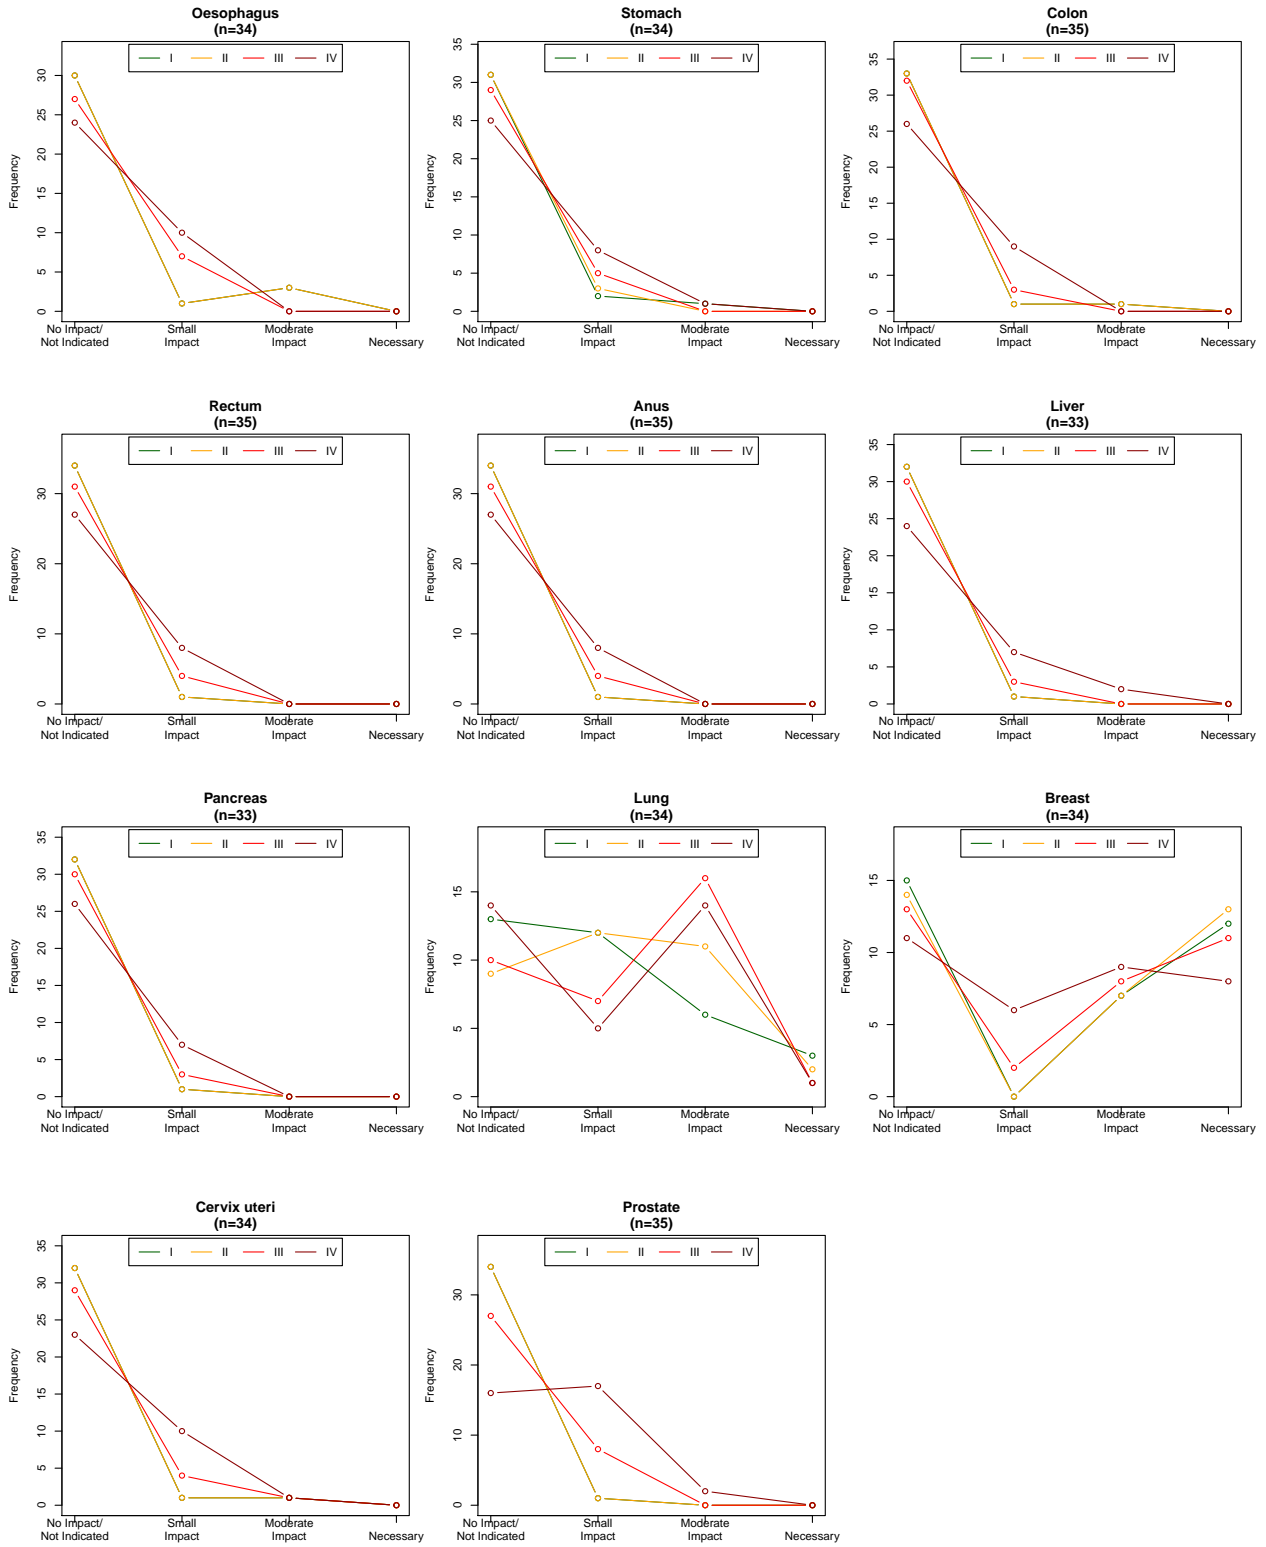

### 1.6.2.7 CT

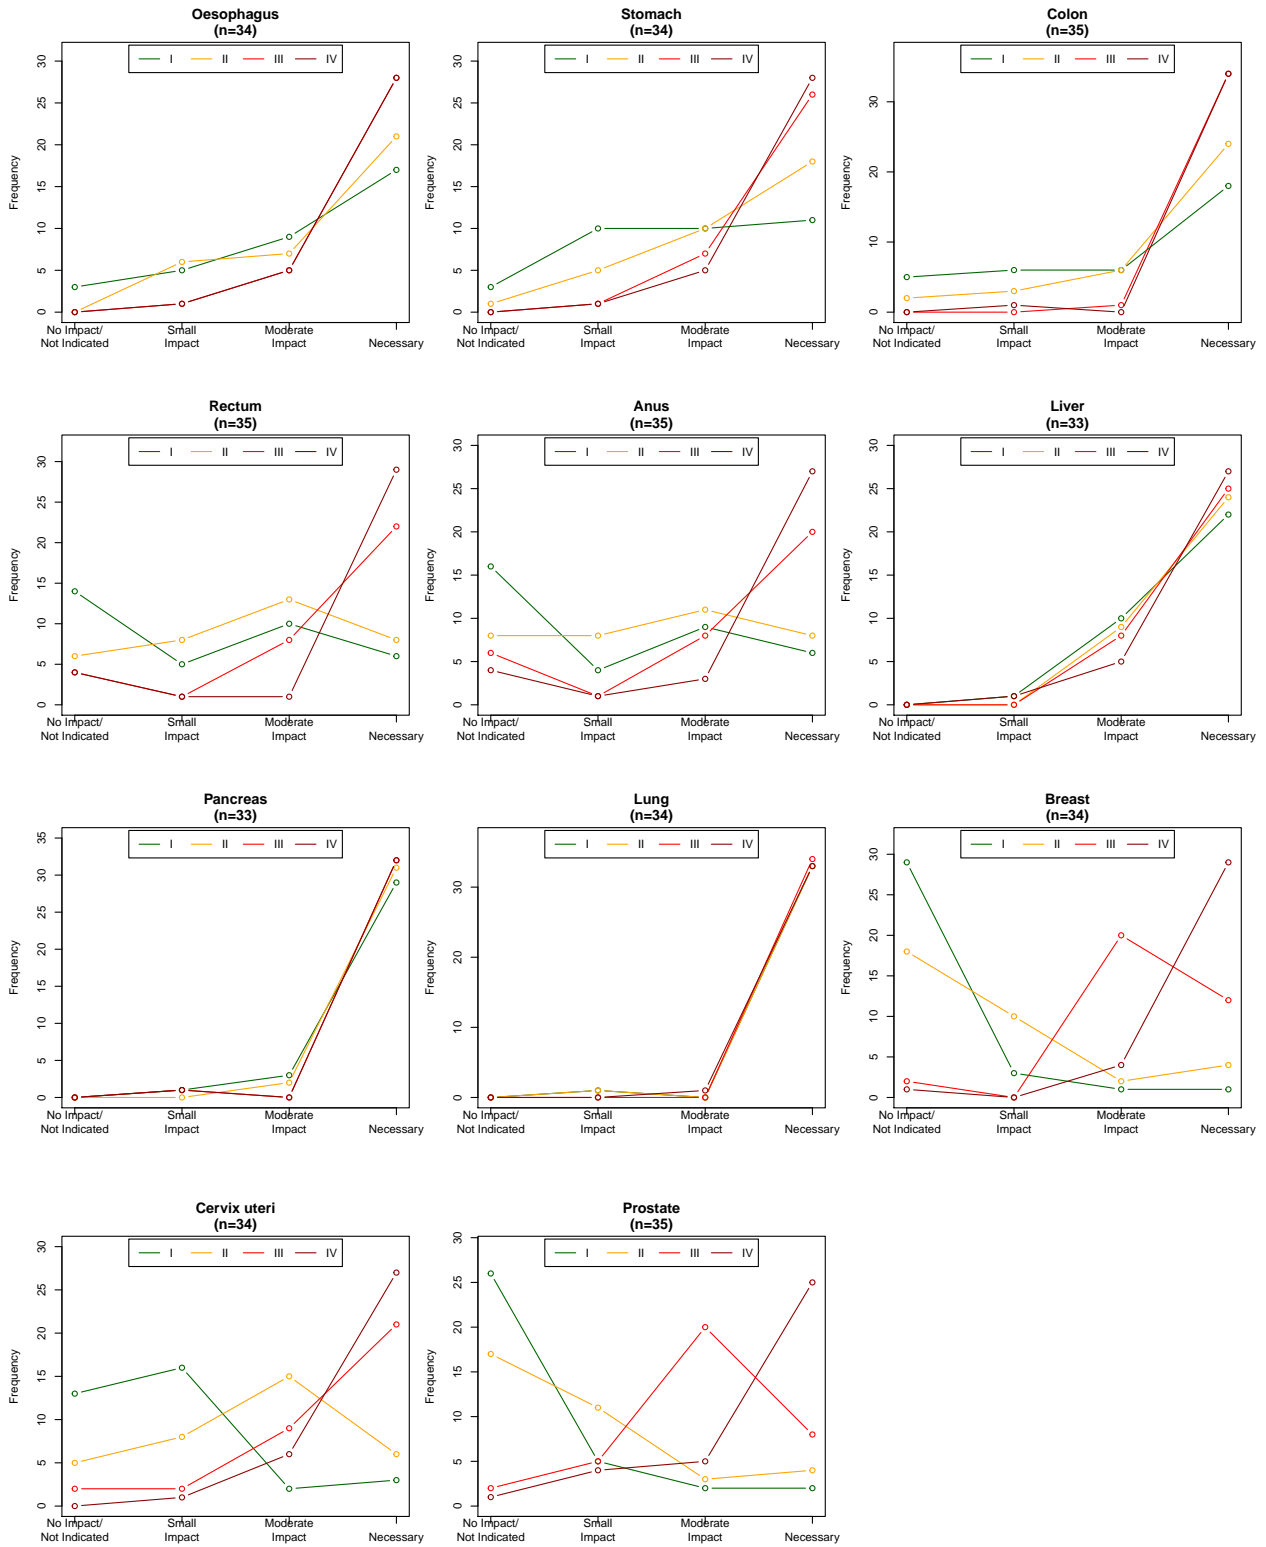

### 1.6.2.8 MRI

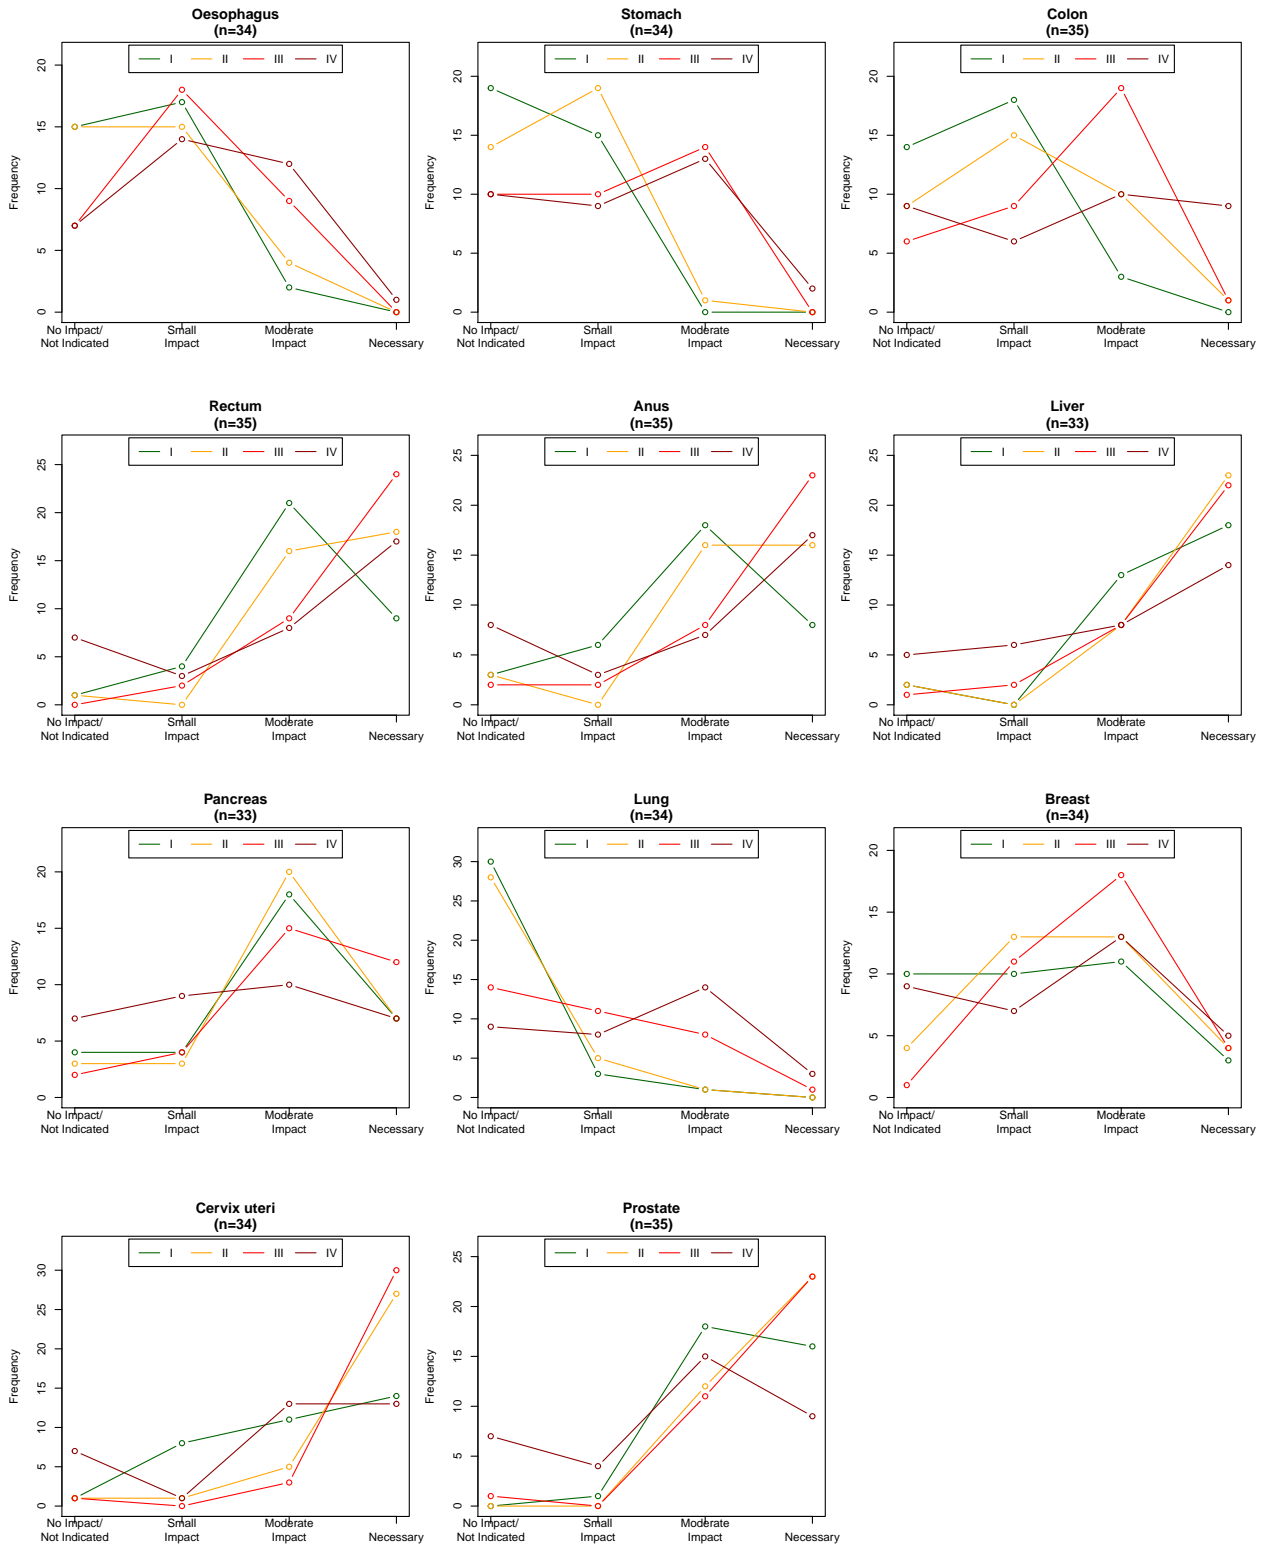

### 1.6.2.9 PET

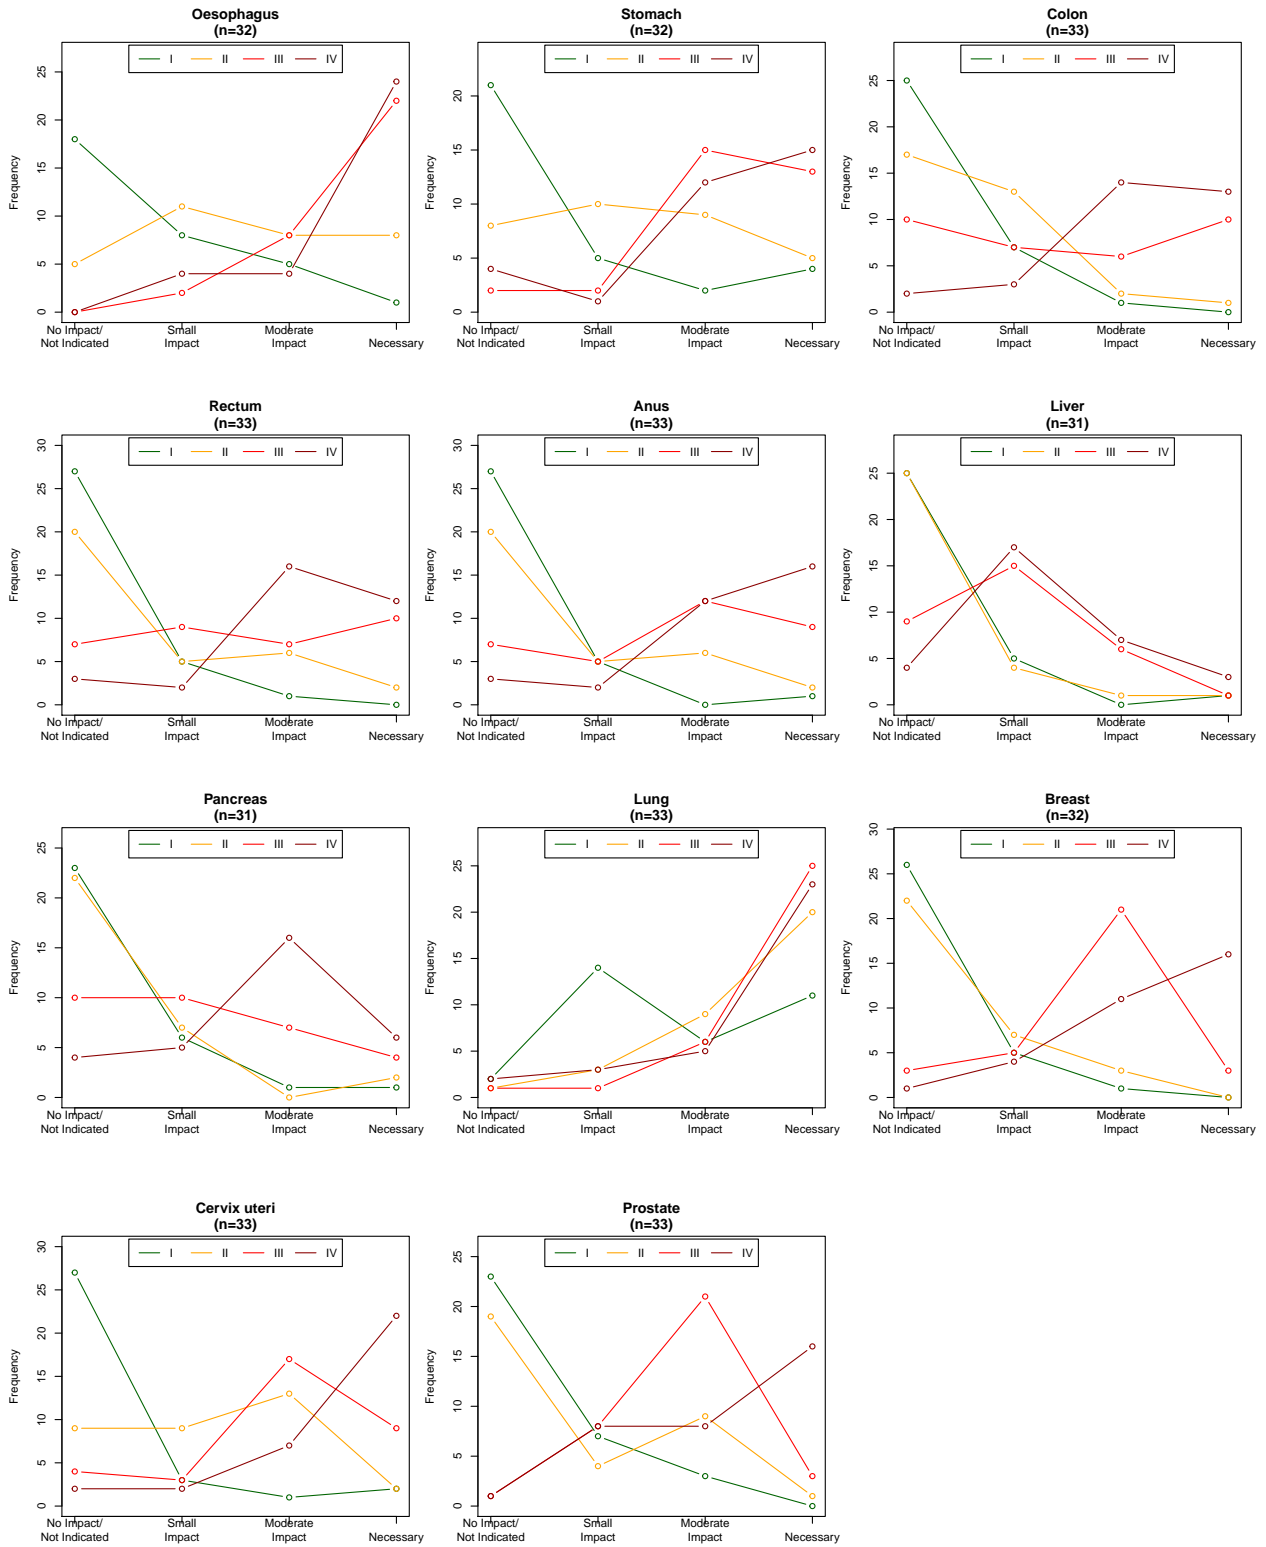

### 1.6.2.10 SPECT

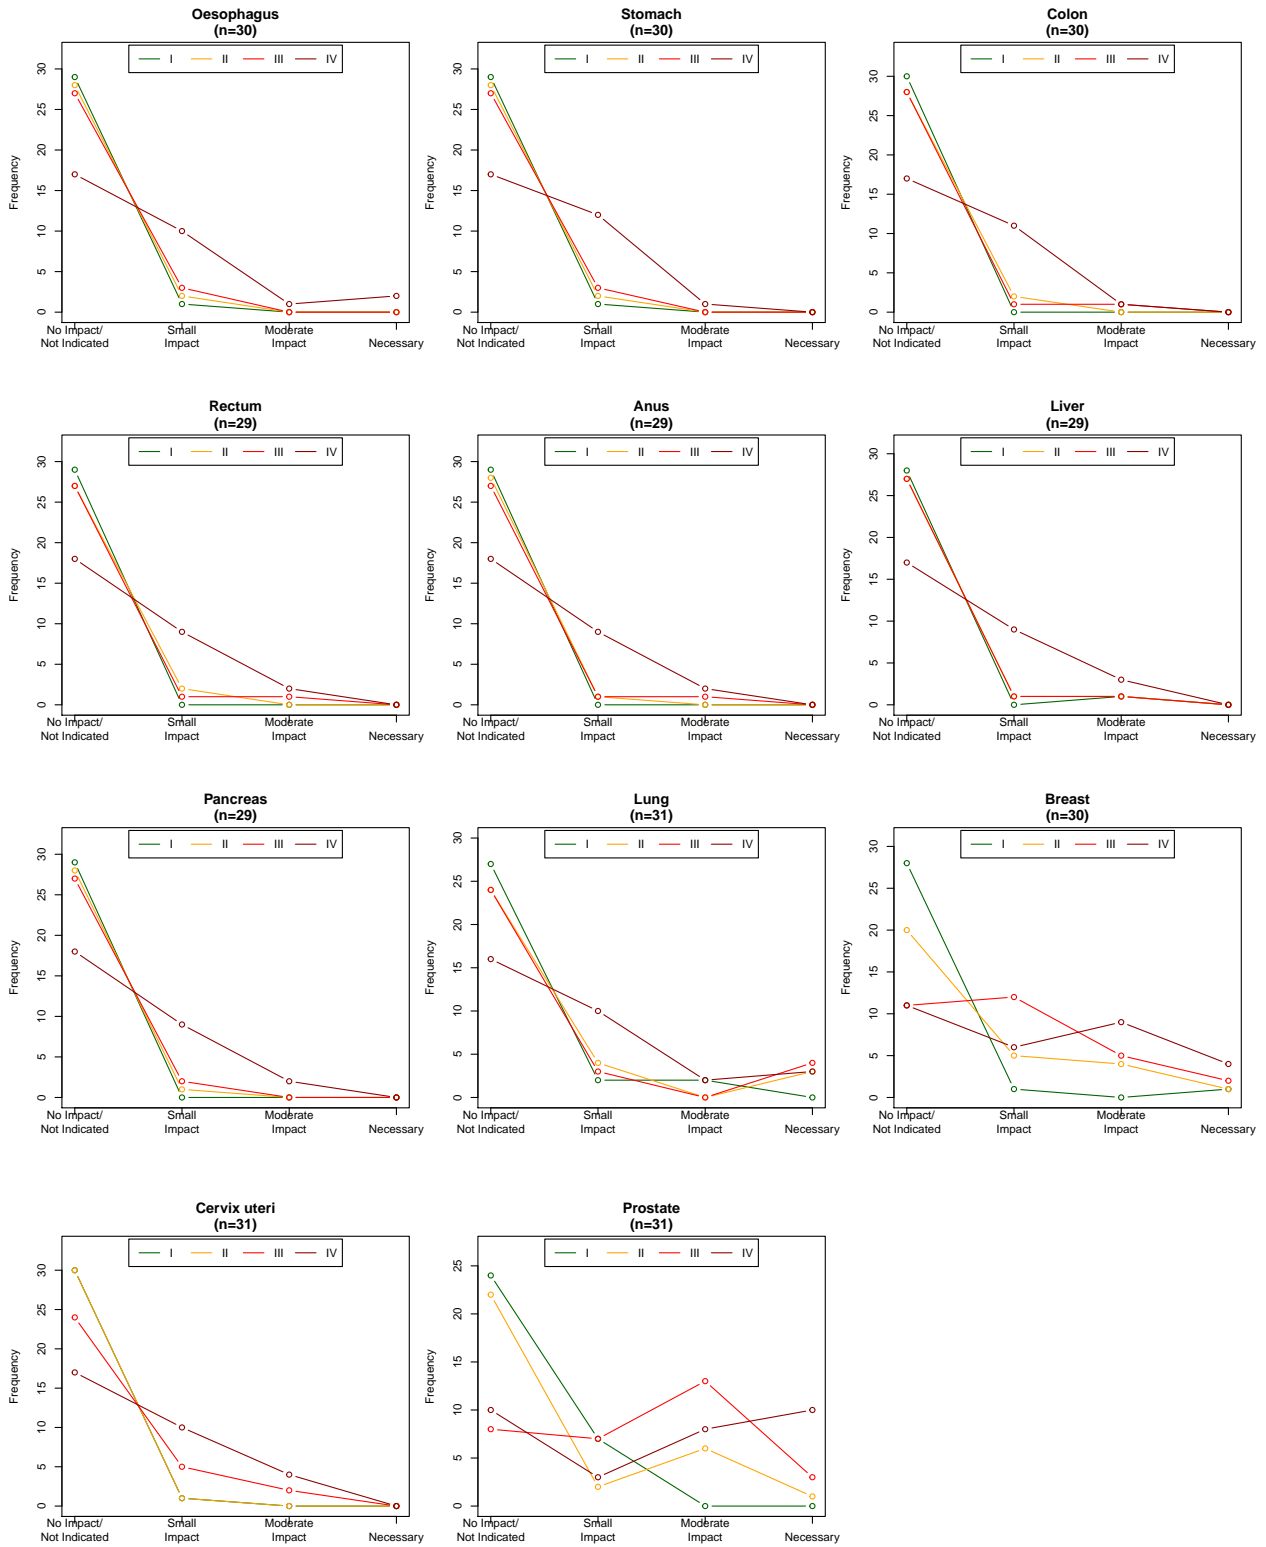

### 1.6.3 Estimated Priors

To estimate prior probability distributions for the probability that each modality was necessary, we weighted the responses as follows and estimated Beta distributions with the sum of the weighted estimates.

| Response                | Description                                                      | Weight |
|-------------------------|------------------------------------------------------------------|--------|
| No impact/Not indicated | Not expected to affect 5-yr survival at all                      | 0.0    |
| Small impact            | May improve the probability of 5-yr survival in some cases       | 0.25   |
| Moderate impact         | Likely to improve the probability of 5-yr survival in most cases | 0.75   |
| Necessary               | Use is necessary to achieve 5-yr survival                        | 1.00   |

#### 1.6.3.1 Chemotherapy

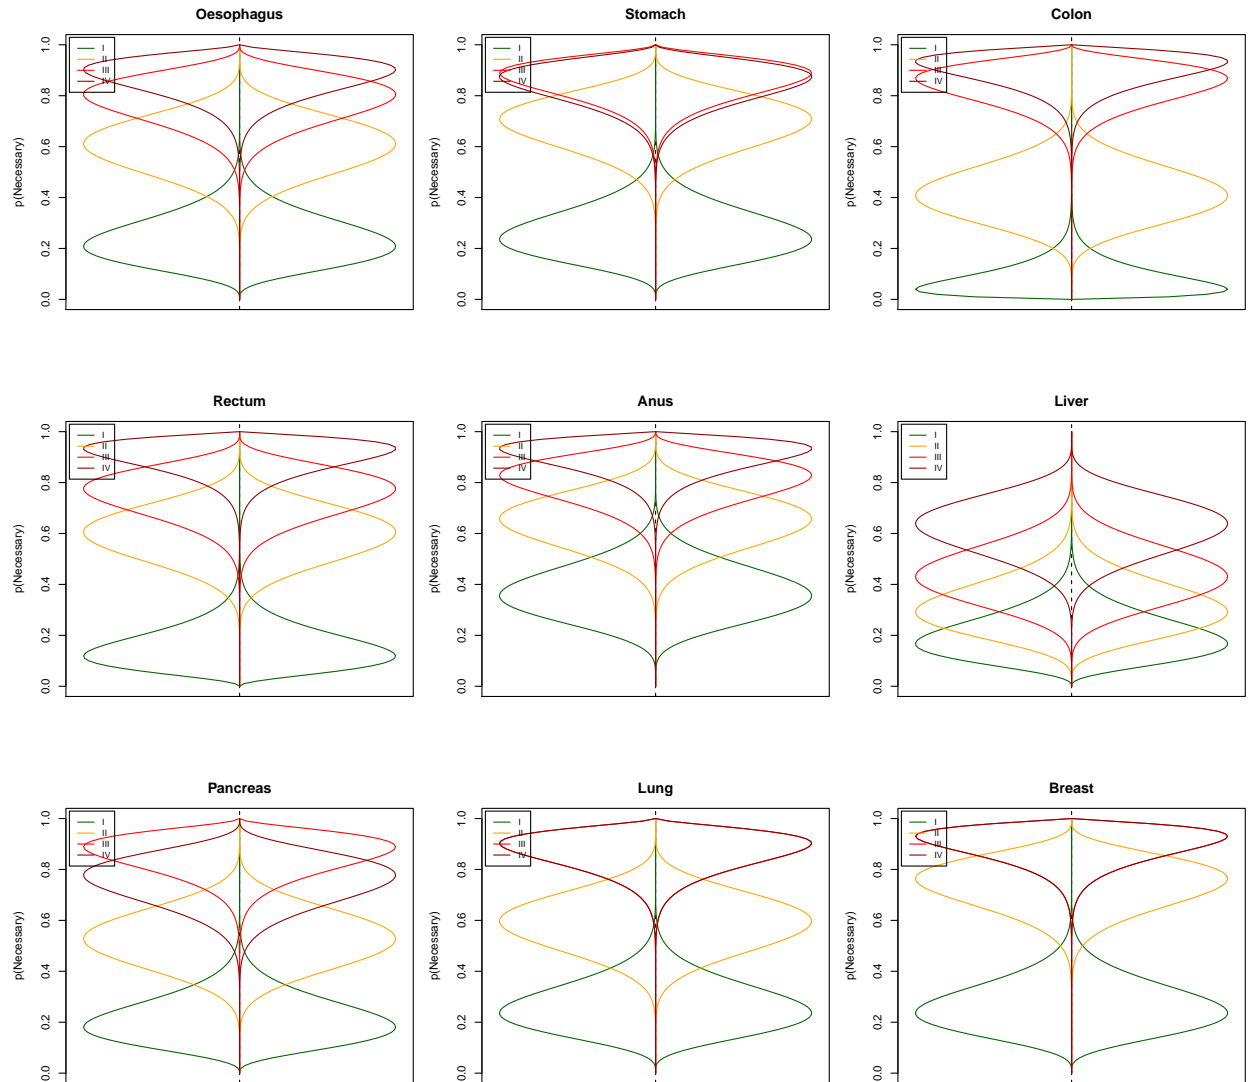

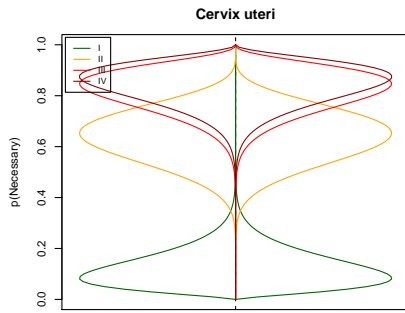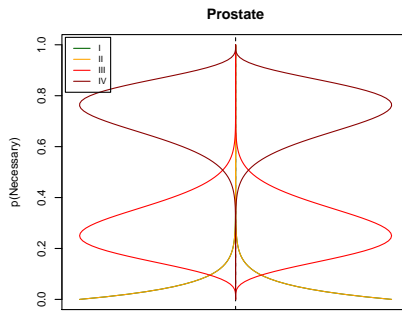

### 1.6.3.2 Radiotherapy

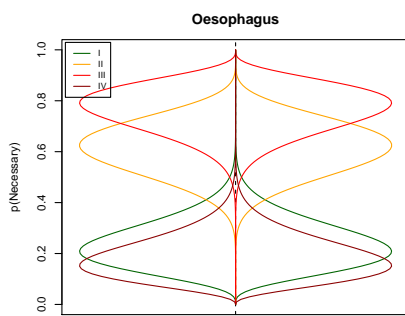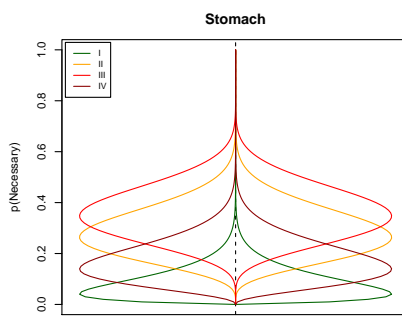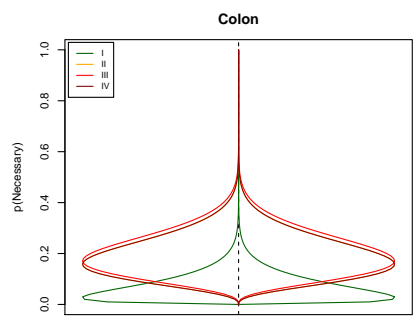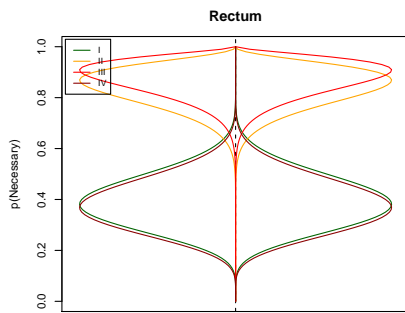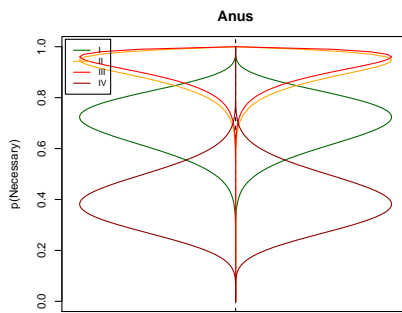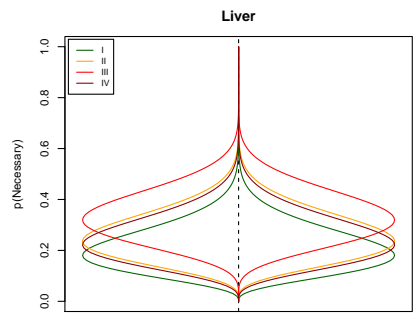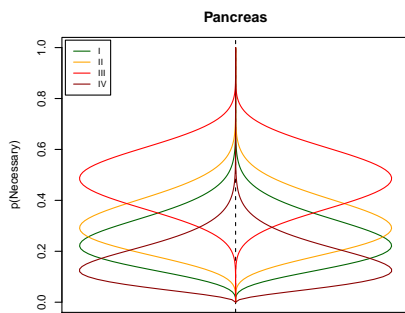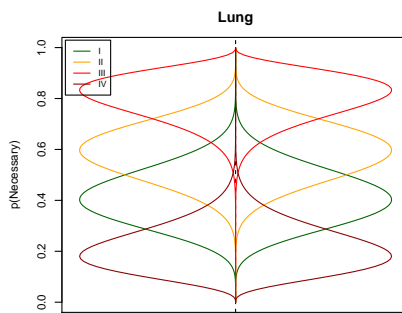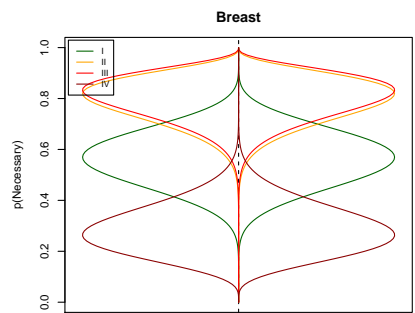



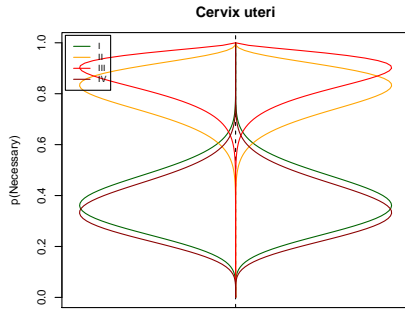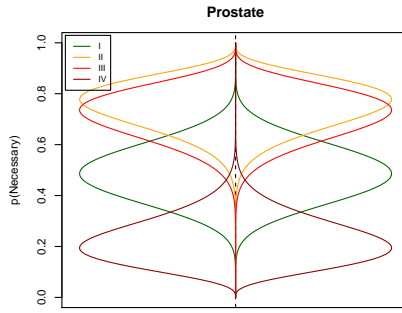

### 1.6.3.3 Surgery

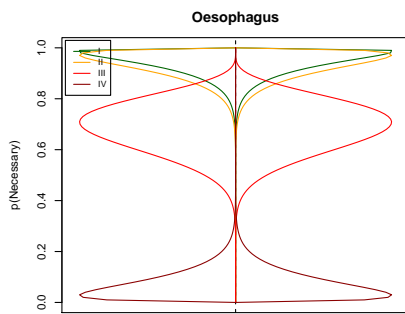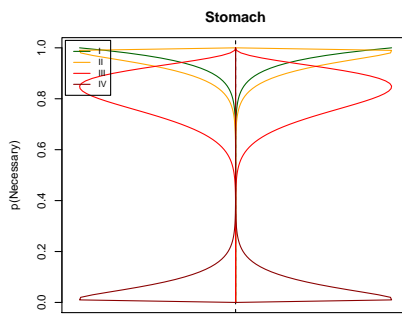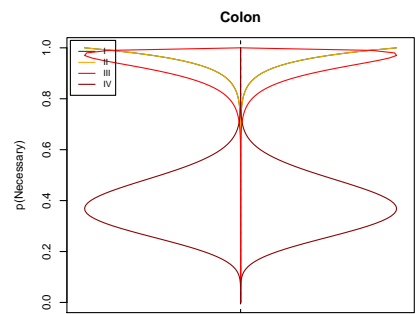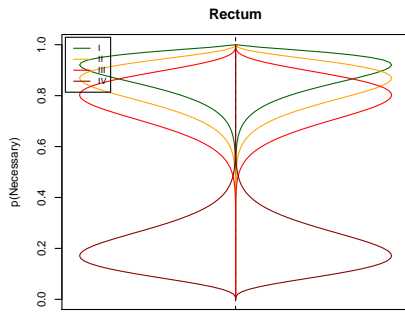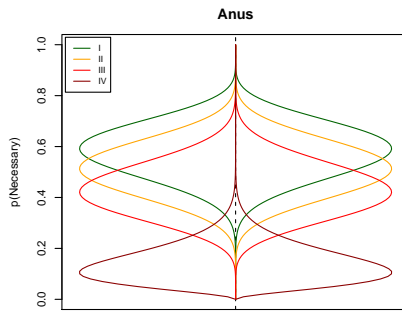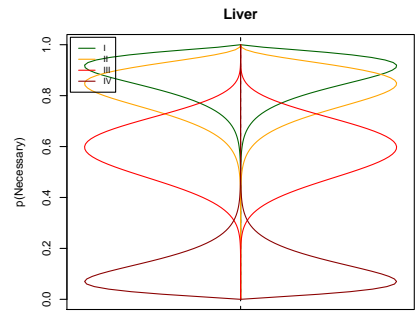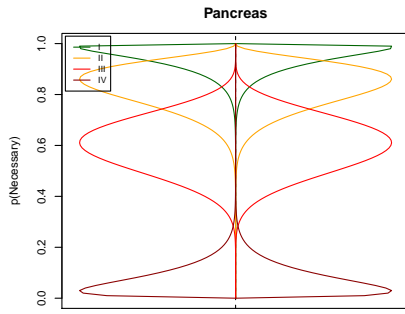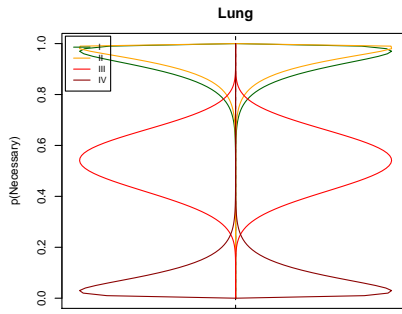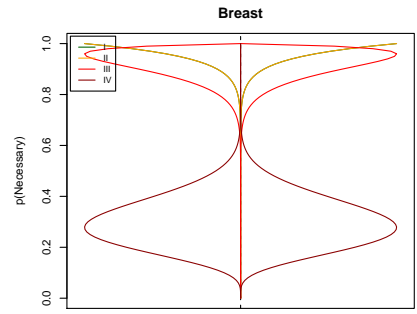

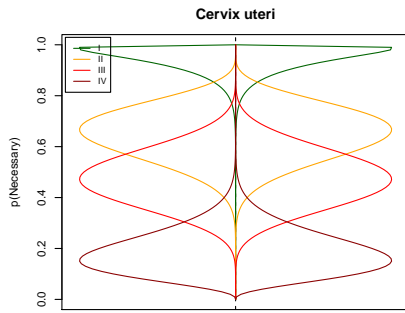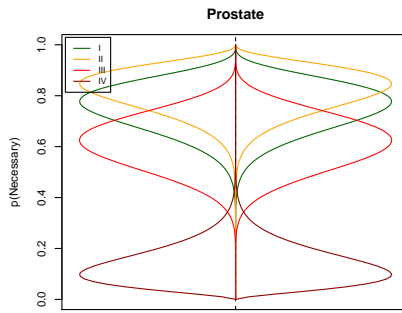

### 1.6.3.4 Targeted Therapy

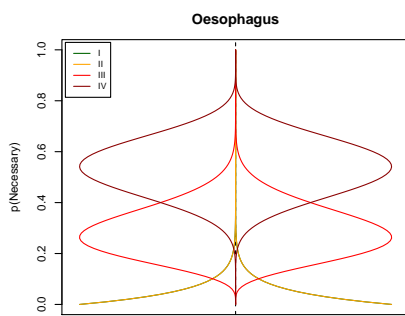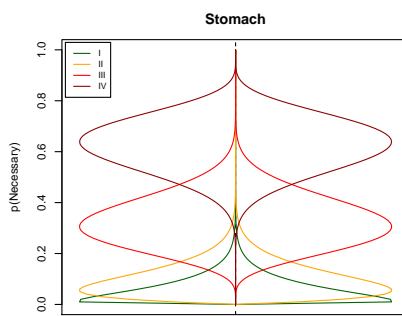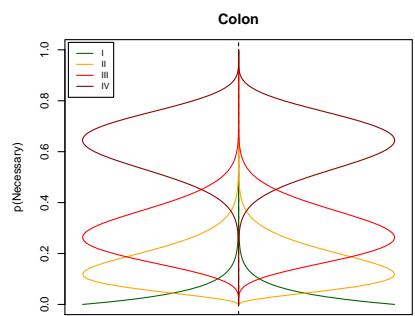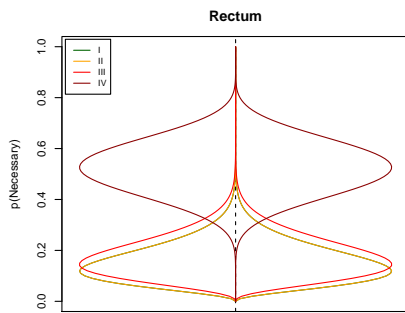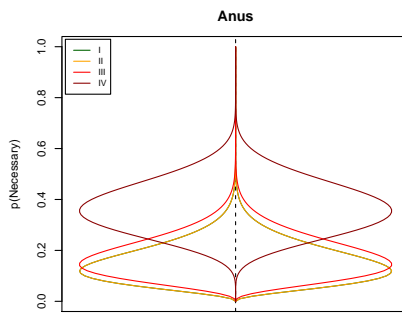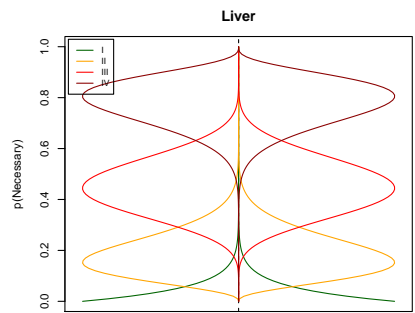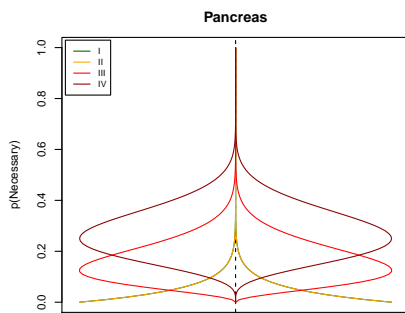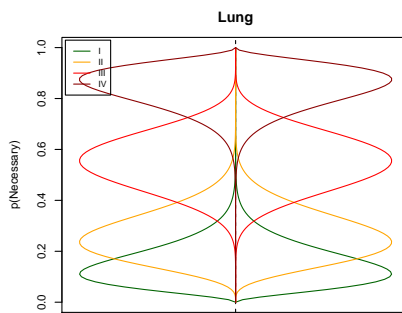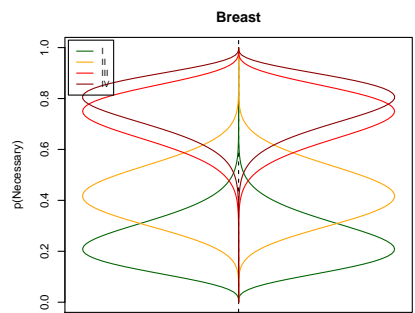

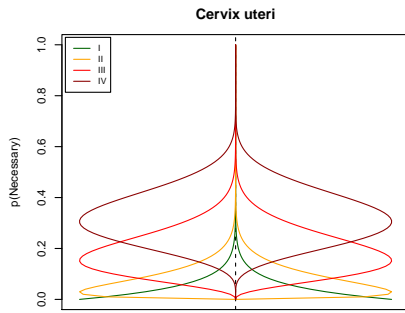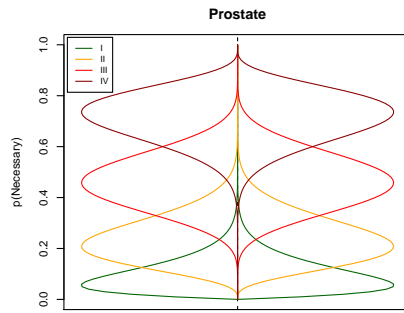

### 1.6.3.5 Ultrasound

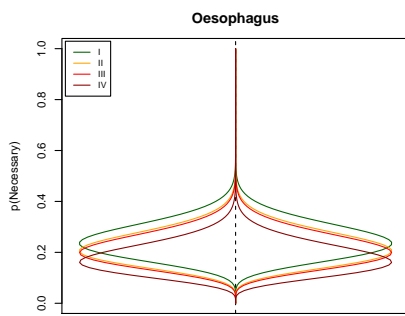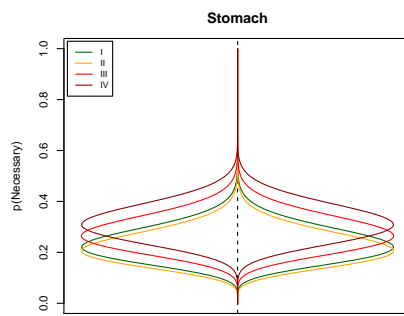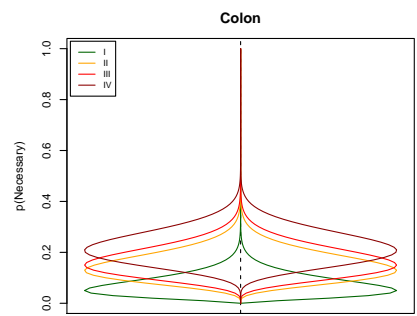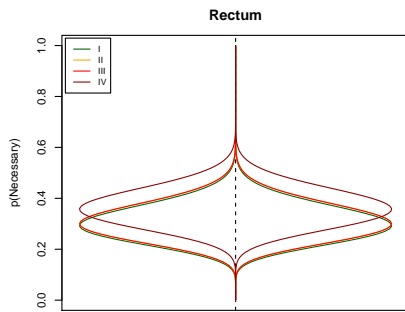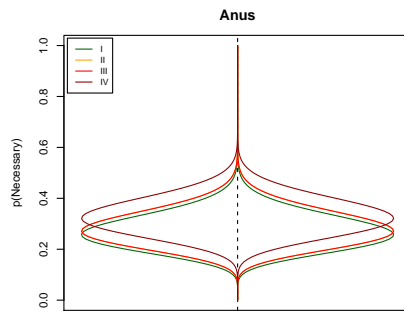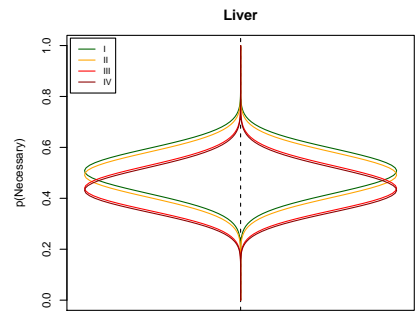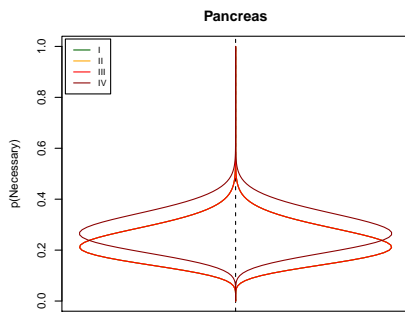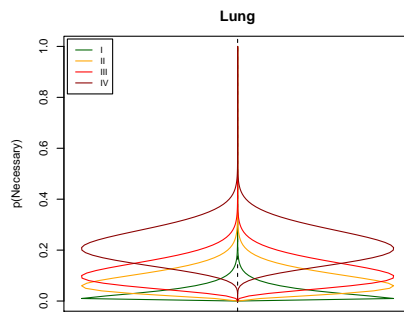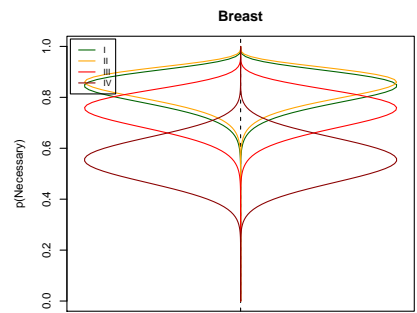

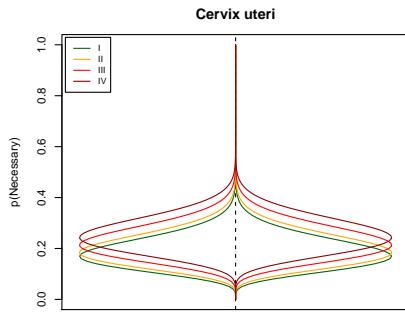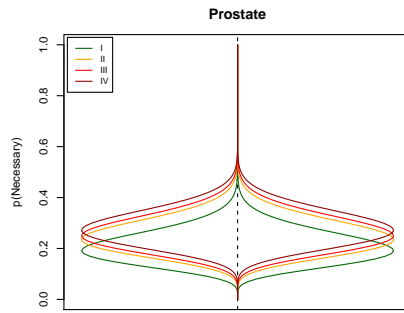

### 1.6.3.6 X-Ray

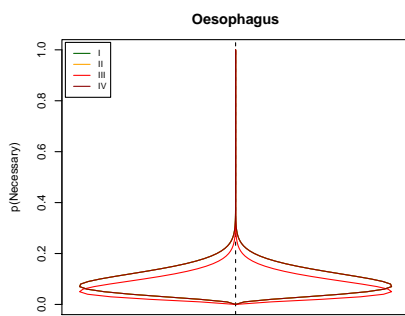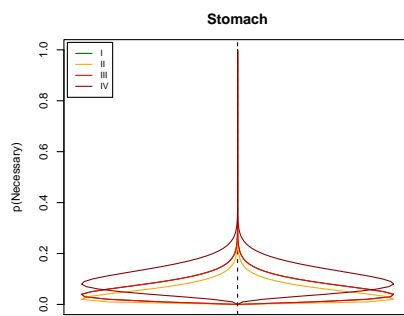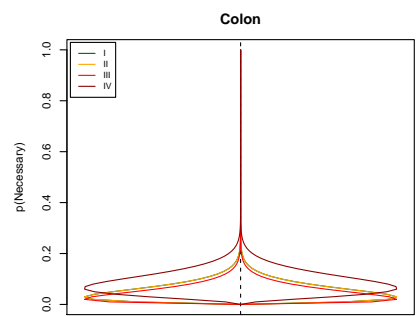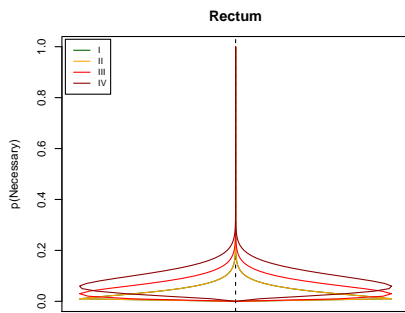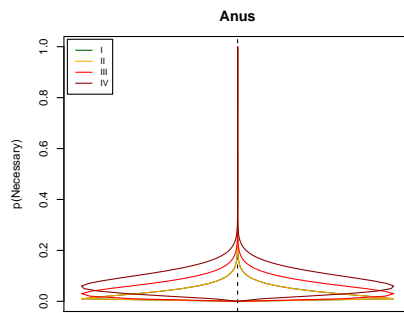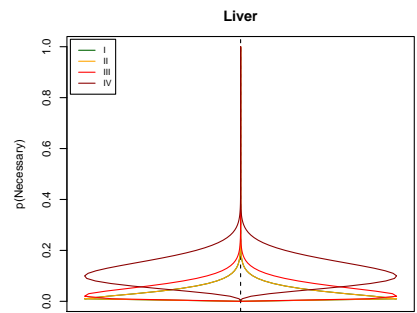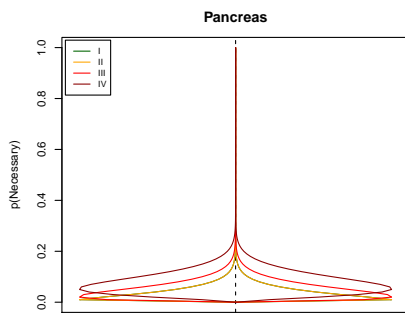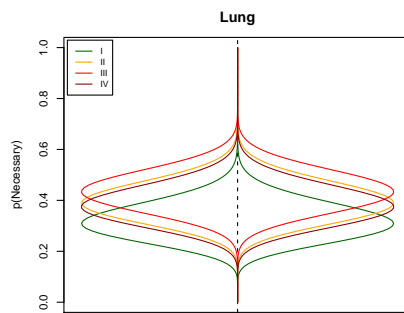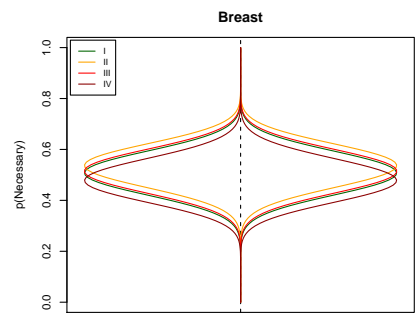

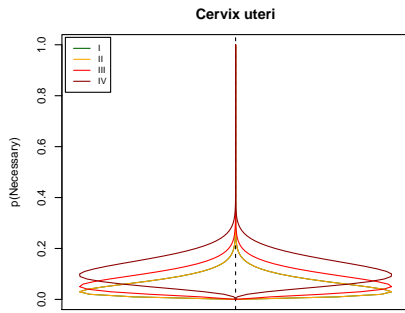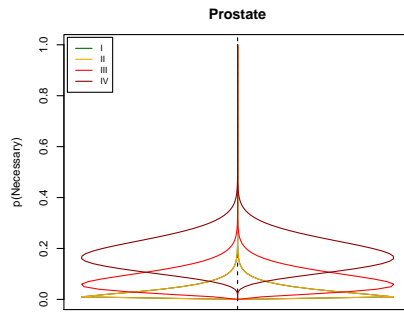

### 1.6.3.7 CT

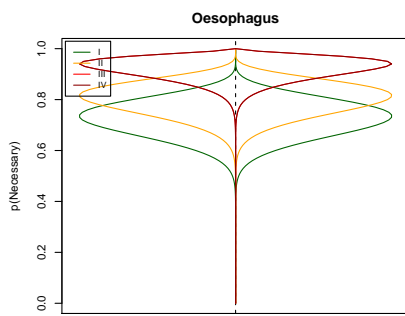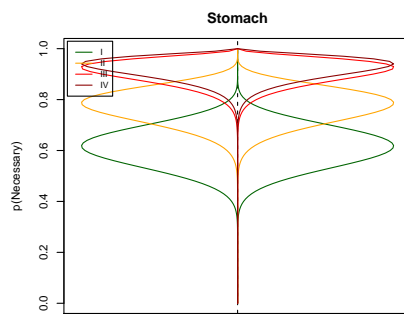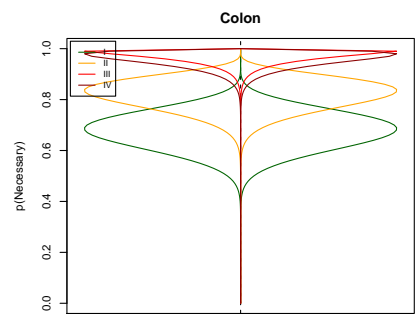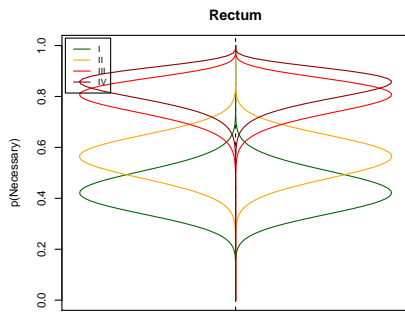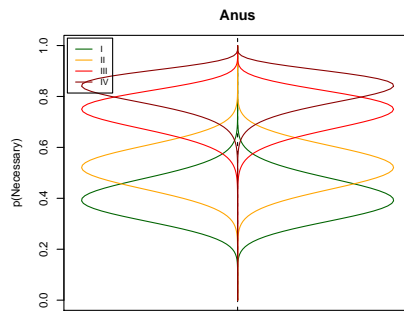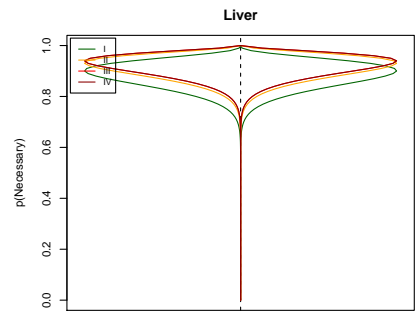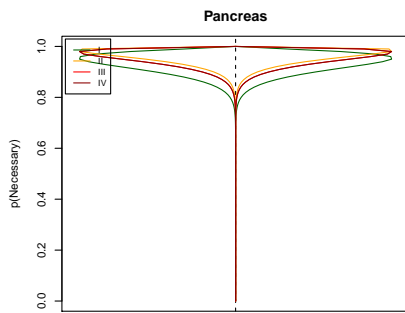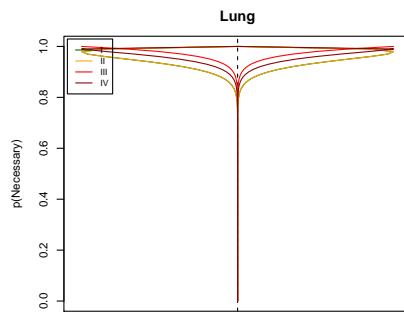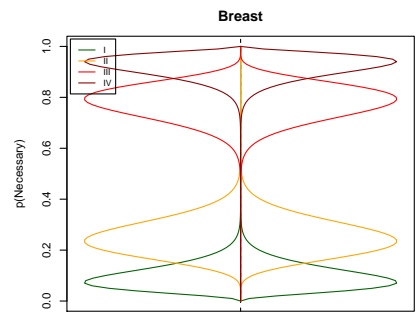

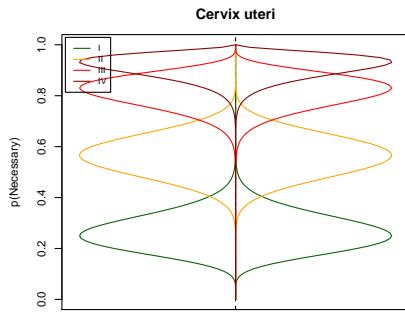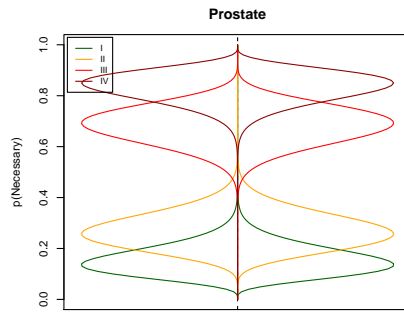

### 1.6.3.8 MRI

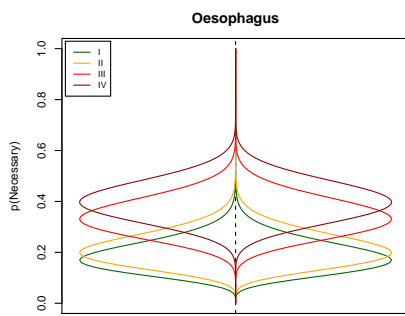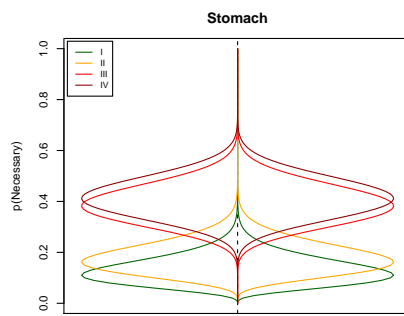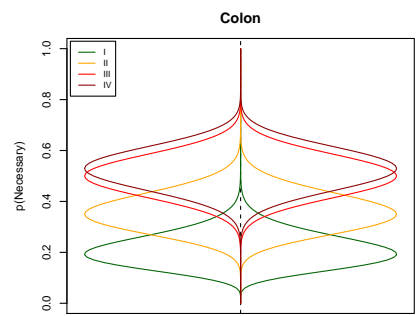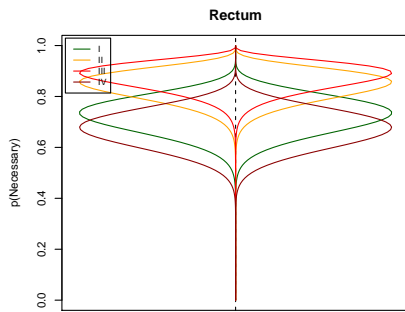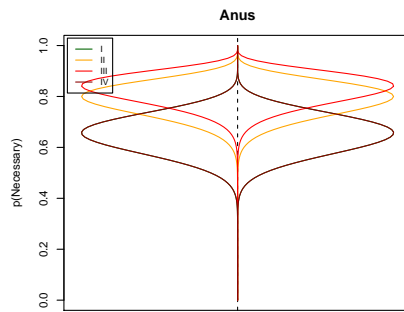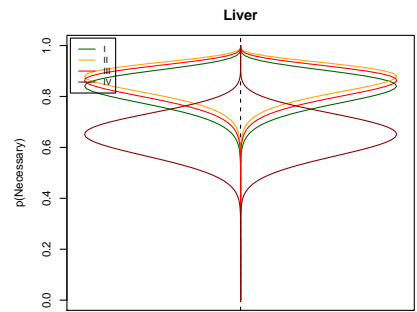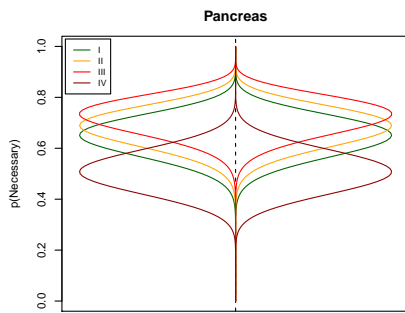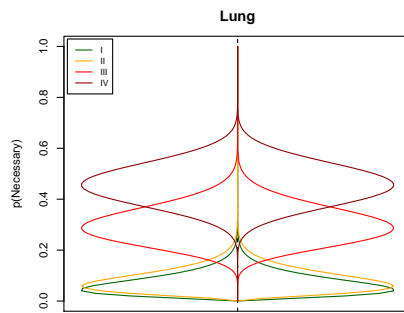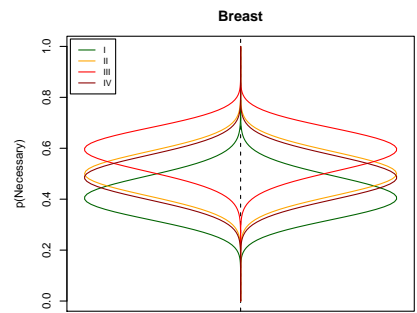

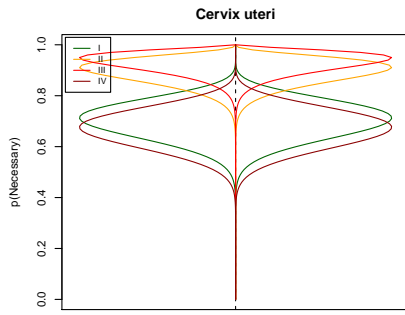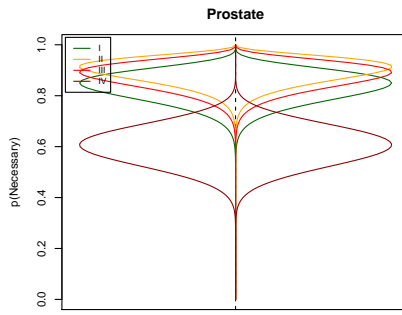

### 1.6.3.9 PET

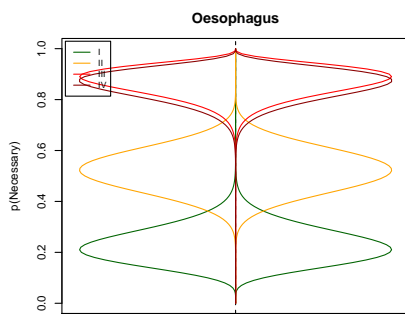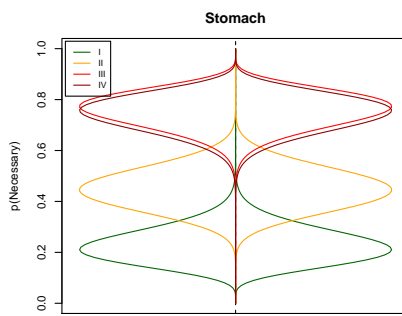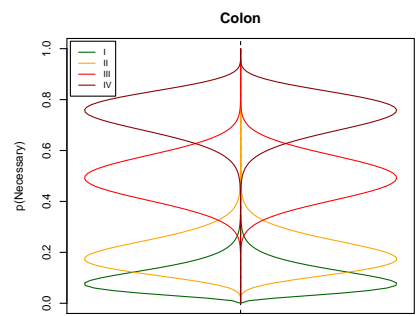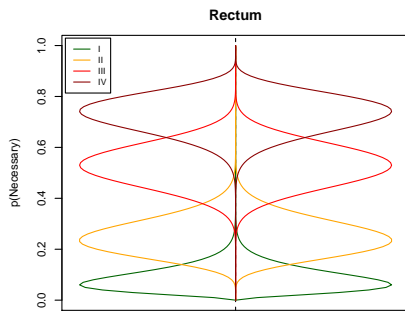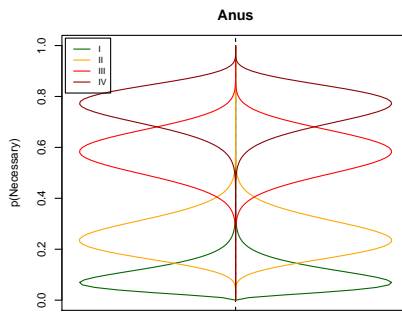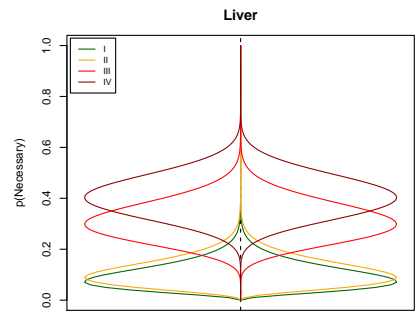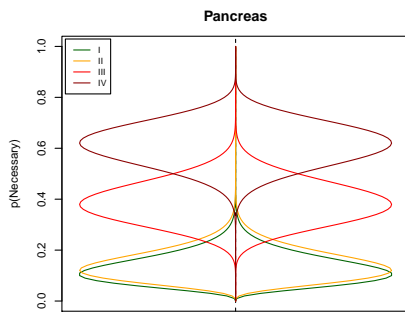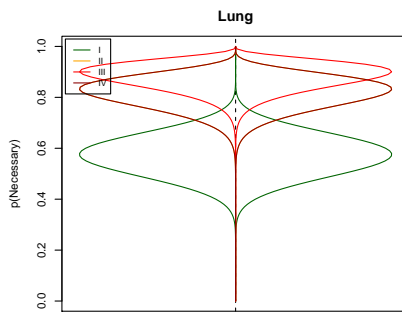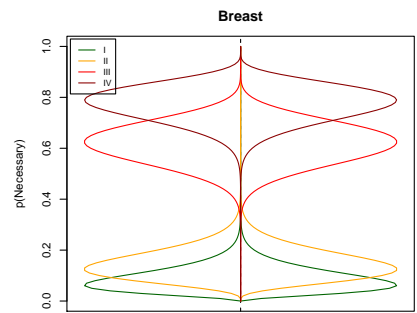

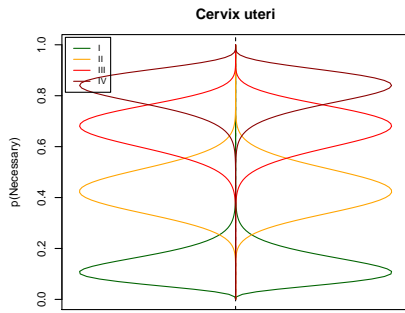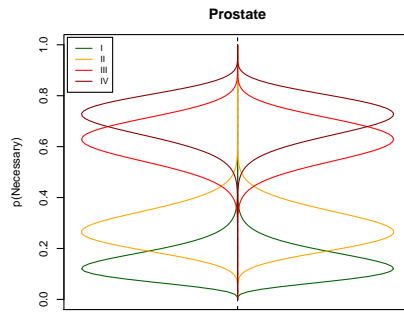

### 1.6.3.10 SPECT

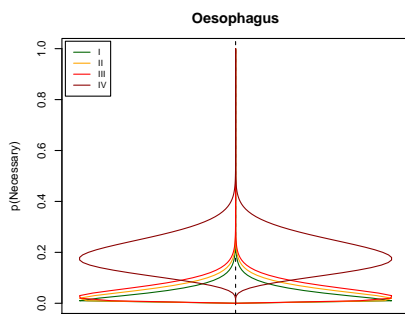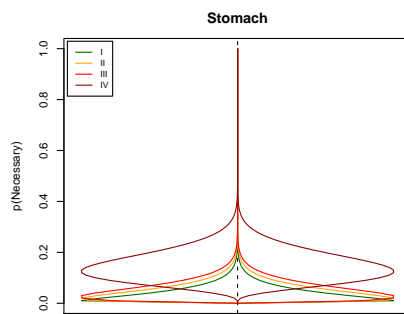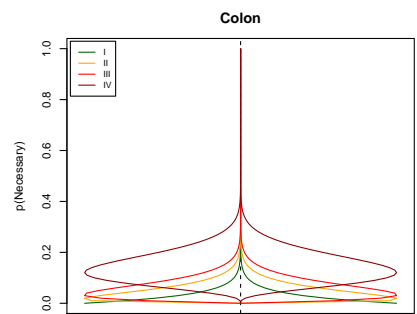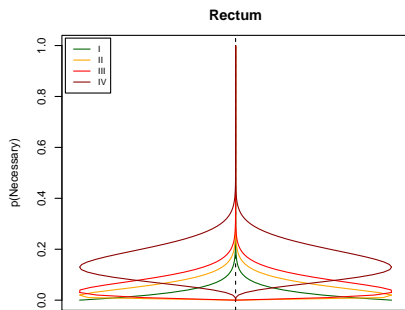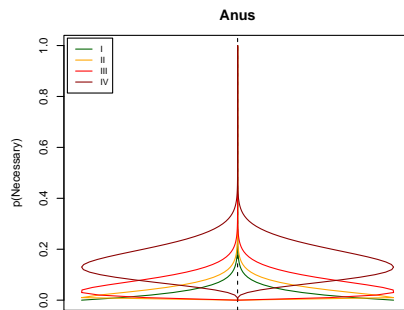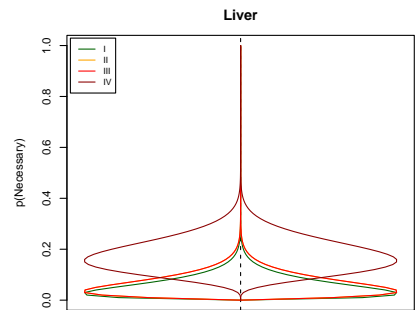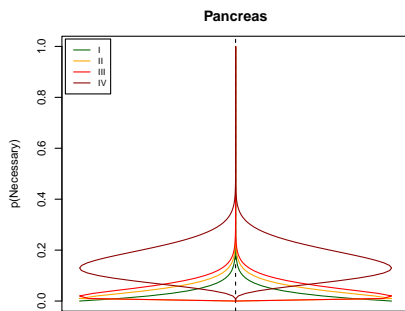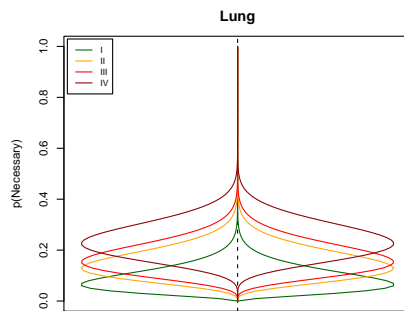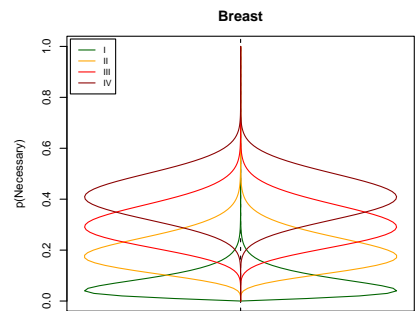



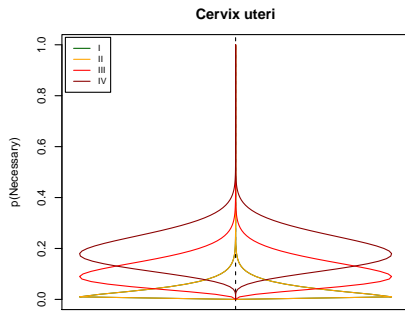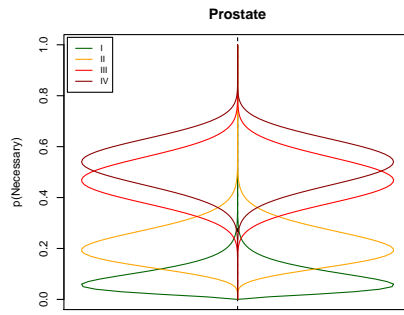

### 1.6.4 Expert Consensus

To provide consensus results, responses with at least 75% agreement were accepted as final responses, while responses with lower levels of agreement were discussed by a panel of experts to forge final consensus. Note that these final consensus results were not used in the simulation model - the estimated priors, plotted above, were used for model calibration. Instead, these consensus results are presented here as a summary of the expert opinion elicitation process and to provide guidance for recommendations for the forthcoming Lancet Oncology Commission on Imaging and Nuclear Medicine.

#### Expert Panel - Imaging

| Participant                 | Institution                                           |
|-----------------------------|-------------------------------------------------------|
| Chair: Dr H. Alberto Vargas | Memorial Sloan Kettering Cancer Center, New York, USA |
| Prof Andrew Scott           | Austin Health, Melbourne, Australia                   |
| Prof Pek-Lan Khong          | University of Hong Kong, Hong Kong                    |
| A/Prof Eddie Lau            | Austin Health, Melbourne, Australia                   |
| Prof Heinz-Peter Schlemmer  | German Cancer Research Center, Heidelberg, Germany    |
| Prof Giles Boland           | Brigham and Women's Hospital, Boston, USA             |
| Prof Marius Mayerhoefer     | University of Vienna, Vienna, Austria                 |

#### Expert Panel - Therapy

| Participant              | Institution                                           |
|--------------------------|-------------------------------------------------------|
| Chair: Dr. Peter Kingham | Memorial Sloan Kettering Cancer Center, New York, USA |
| Dr Surbhi Grover         | University of Pennsylvania, Pennsylvania, USA         |
| Prof Hui Gan             | Austin Health, Melbourne, Australia                   |
| Dr Diane Reidy           | Memorial Sloan Kettering Cancer Center, New York, USA |
| Prof Farshad Foroudi     | Austin Health, Melbourne, Australia                   |
| Dr Martin Weiser         | Memorial Sloan Kettering Cancer Center, New York, USA |

#### Oesophagus

| Modality         | Stage I      | Stage II        | Stage III       | Stage IV        |
|------------------|--------------|-----------------|-----------------|-----------------|
| <i>Treatment</i> |              |                 |                 |                 |
| Chemotherapy     | Small impact | Moderate impact | Moderate impact | Necessary       |
| Radiotherapy     | Small impact | Moderate impact | Moderate impact | No impact       |
| Surgery          | Necessary    | Necessary       | Small impact    | No impact       |
| Targeted therapy | No impact    | No impact       | No impact       | Small impact    |
| <i>Imaging</i>   |              |                 |                 |                 |
| Ultrasound       | No impact    | No impact       | No impact       | Small impact    |
| X-ray            | No impact    | No impact       | No impact       | No impact       |
| CT               | Necessary    | Necessary       | Necessary       | Necessary       |
| MRI              | Small impact | Small impact    | Moderate impact | Moderate impact |
| PET              | No impact    | Small impact    | Necessary       | Necessary       |
| SPECT            | No impact    | No impact       | No impact       | Small impact    |

## Stomach

| Modality         | Stage I      | Stage II        | Stage III       | Stage IV        |
|------------------|--------------|-----------------|-----------------|-----------------|
| <i>Treatment</i> |              |                 |                 |                 |
| Chemotherapy     | Small impact | Moderate impact | Necessary       | Necessary       |
| Radiotherapy     | Small impact | Small impact    | Small impact    | No impact       |
| Surgery          | Necessary    | Necessary       | Moderate impact | No impact       |
| Targeted therapy | No impact    | No impact       | No impact       | Small impact    |
| <i>Imaging</i>   |              |                 |                 |                 |
| Ultrasound       | No impact    | No impact       | No impact       | Small impact    |
| X-ray            | No impact    | No impact       | No impact       | No impact       |
| CT               | Necessary    | Necessary       | Necessary       | Necessary       |
| MRI              | Small impact | Small impact    | Moderate impact | Moderate impact |
| PET              | No impact    | Small impact    | Necessary       | Necessary       |
| SPECT            | No impact    | No impact       | No impact       | Small impact    |

## Colon

| Modality         | Stage I      | Stage II     | Stage III       | Stage IV        |
|------------------|--------------|--------------|-----------------|-----------------|
| <i>Treatment</i> |              |              |                 |                 |
| Chemotherapy     | No impact    | Small impact | Moderate impact | Necessary       |
| Radiotherapy     | No impact    | No impact    | No impact       | No impact       |
| Surgery          | Necessary    | Necessary    | Necessary       | Small impact    |
| Targeted therapy | No impact    | No impact    | No impact       | Small impact    |
| <i>Imaging</i>   |              |              |                 |                 |
| Ultrasound       | No impact    | No impact    | No impact       | Moderate impact |
| X-ray            | No impact    | No impact    | No impact       | No impact       |
| CT               | Necessary    | Necessary    | Necessary       | Necessary       |
| MRI              | Small impact | Small impact | Moderate impact | Moderate impact |
| PET              | No impact    | No impact    | Small impact    | Necessary       |
| SPECT            | No impact    | No impact    | No impact       | Small impact    |

## Rectum

| Modality         | Stage I   | Stage II     | Stage III       | Stage IV     |
|------------------|-----------|--------------|-----------------|--------------|
| <i>Treatment</i> |           |              |                 |              |
| Chemotherapy     | No impact | Small impact | Moderate impact | Necessary    |
| Radiotherapy     | No impact | Necessary    | Necessary       | No impact    |
| Surgery          | Necessary | Necessary    | Necessary       | No impact    |
| Targeted therapy | No impact | No impact    | No impact       | Small impact |
| <i>Imaging</i>   |           |              |                 |              |
| Ultrasound       | No impact | No impact    | No impact       | Small impact |
| X-ray            | No impact | No impact    | No impact       | No impact    |
| CT               | Necessary | Necessary    | Necessary       | Necessary    |
| MRI              | Necessary | Necessary    | Necessary       | Necessary    |
| PET              | No impact | No impact    | Necessary       | Necessary    |
| SPECT            | No impact | No impact    | No impact       | Small impact |

## Anus

| Modality         | Stage I         | Stage II        | Stage III       | Stage IV     |
|------------------|-----------------|-----------------|-----------------|--------------|
| <i>Treatment</i> |                 |                 |                 |              |
| Chemotherapy     | No impact       | Necessary       | Necessary       | Necessary    |
| Radiotherapy     | Necessary       | Necessary       | Necessary       | No impact    |
| Surgery          | No impact       | No impact       | No impact       | No impact    |
| Targeted therapy | No impact       | No impact       | No impact       | Small impact |
| <i>Imaging</i>   |                 |                 |                 |              |
| Ultrasound       | No impact       | No impact       | No impact       | Small impact |
| X-ray            | No impact       | No impact       | No impact       | No impact    |
| CT               | Small impact    | Moderate impact | Necessary       | Necessary    |
| MRI              | Moderate impact | Moderate impact | Necessary       | Necessary    |
| PET              | No impact       | No impact       | Moderate impact | Necessary    |
| SPECT            | No impact       | No impact       | No impact       | Small impact |

## Liver

| Modality         | Stage I   | Stage II  | Stage III       | Stage IV        |
|------------------|-----------|-----------|-----------------|-----------------|
| <i>Treatment</i> |           |           |                 |                 |
| Chemotherapy     | No impact | No impact | No impact       | Small impact    |
| Radiotherapy     | No impact | No impact | Small impact    | No impact       |
| Surgery          | Necessary | Necessary | Small impact    | No impact       |
| Targeted therapy | No impact | No impact | Moderate impact | Necessary       |
| <i>Imaging</i>   |           |           |                 |                 |
| Ultrasound       | Necessary | Necessary | Necessary       | Necessary       |
| X-ray            | No impact | No impact | No impact       | No impact       |
| CT               | Necessary | Necessary | Necessary       | Necessary       |
| MRI              | Necessary | Necessary | Necessary       | Necessary       |
| PET              | No impact | No impact | Moderate impact | Moderate impact |
| SPECT            | No impact | No impact | No impact       | Small impact    |

## Pancreas

| Modality         | Stage I      | Stage II     | Stage III       | Stage IV        |
|------------------|--------------|--------------|-----------------|-----------------|
| <i>Treatment</i> |              |              |                 |                 |
| Chemotherapy     | Small impact | Small impact | Necessary       | Necessary       |
| Radiotherapy     | No impact    | Small impact | Moderate impact | No impact       |
| Surgery          | Necessary    | Necessary    | Moderate impact | No impact       |
| Targeted therapy | No impact    | No impact    | No impact       | Small impact    |
| <i>Imaging</i>   |              |              |                 |                 |
| Ultrasound       | Small impact | Small impact | Moderate impact | Necessary       |
| X-ray            | No impact    | No impact    | No impact       | No impact       |
| CT               | Necessary    | Necessary    | Necessary       | Necessary       |
| MRI              | Necessary    | Necessary    | Necessary       | Necessary       |
| PET              | No impact    | No impact    | Moderate impact | Moderate impact |
| SPECT            | No impact    | No impact    | No impact       | Small impact    |

## Lung

| Modality         | Stage I         | Stage II     | Stage III       | Stage IV        |
|------------------|-----------------|--------------|-----------------|-----------------|
| <i>Treatment</i> |                 |              |                 |                 |
| Chemotherapy     | No impact       | Necessary    | Necessary       | Necessary       |
| Radiotherapy     | Small impact    | No impact    | Necessary       | No impact       |
| Surgery          | Necessary       | Necessary    | Moderate impact | No impact       |
| Targeted therapy | No impact       | No impact    | Moderate impact | Necessary       |
| <i>Imaging</i>   |                 |              |                 |                 |
| Ultrasound       | No impact       | No impact    | No impact       | Moderate impact |
| X-ray            | Small impact    | Small impact | Small impact    | Small impact    |
| CT               | Necessary       | Necessary    | Necessary       | Necessary       |
| MRI              | No impact       | No impact    | No impact       | Moderate impact |
| PET              | Moderate impact | Necessary    | Necessary       | Necessary       |
| SPECT            | No impact       | No impact    | No impact       | Moderate impact |

## Breast

| Modality         | Stage I         | Stage II        | Stage III       | Stage IV  |
|------------------|-----------------|-----------------|-----------------|-----------|
| <i>Treatment</i> |                 |                 |                 |           |
| Chemotherapy     | Small impact    | Necessary       | Necessary       | Necessary |
| Radiotherapy     | Small impact    | Necessary       | Necessary       | No impact |
| Surgery          | Necessary       | Necessary       | Necessary       | No impact |
| Targeted therapy | Small impact    | Moderate impact | Necessary       | Necessary |
| <i>Imaging</i>   |                 |                 |                 |           |
| Ultrasound       | Necessary       | Necessary       | Necessary       | Necessary |
| X-ray            | No impact       | No impact       | No impact       | No impact |
| CT               | No impact       | No impact       | Moderate impact | Necessary |
| MRI              | Moderate impact | Moderate impact | Moderate impact | Necessary |
| PET              | No impact       | No impact       | Moderate impact | Necessary |
| SPECT            | Small impact    | Small impact    | Moderate impact | Necessary |

## Cervical

| Modality         | Stage I      | Stage II        | Stage III    | Stage IV        |
|------------------|--------------|-----------------|--------------|-----------------|
| <i>Treatment</i> |              |                 |              |                 |
| Chemotherapy     | Necessary+   | Necessary+      | Necessary    | Necessary       |
| Radiotherapy     | Necessary+   | Necessary+      | Necessary    | No impact       |
| Surgery          | Necessary    | Small impact    | No impact    | No impact       |
| Targeted therapy | No impact    | No impact       | No impact    | No impact       |
| <i>Imaging</i>   |              |                 |              |                 |
| Ultrasound       | No impact    | Small impact    | Small impact | Moderate impact |
| X-ray            | No impact    | No impact       | No impact    | No impact       |
| CT               | Small impact | Moderate impact | Necessary    | Necessary       |
| MRI              | Necessary    | Necessary       | Necessary    | Necessary       |
| PET              | No impact    | Necessary       | Necessary    | Necessary       |
| SPECT            | No impact    | No impact       | No impact    | Small impact    |

+For patients with bulky Stage I/II disease or parametrial extension

## Prostate

| Modality         | Stage I         | Stage II  | Stage III       | Stage IV     |
|------------------|-----------------|-----------|-----------------|--------------|
| <i>Treatment</i> |                 |           |                 |              |
| Chemotherapy     | No impact       | No impact | No impact       | Necessary    |
| Radiotherapy     | Necessary       | Necessary | Necessary       | Small impact |
| Surgery          | Necessary       | Necessary | Small impact    | No impact    |
| Targeted therapy | No impact       | No impact | Necessary       | Necessary    |
| <i>Imaging</i>   |                 |           |                 |              |
| Ultrasound       | No impact       | No impact | No impact       | Small impact |
| X-ray            | No impact       | No impact | No impact       | Small impact |
| CT               | No impact       | No impact | Moderate impact | Necessary    |
| MRI              | Moderate impact | Necessary | Necessary       | Necessary    |
| PET              | No impact       | No impact | Necessary       | Necessary    |
| SPECT            | No impact       | No impact | Moderate impact | Necessary    |

### 1.6.5 Impact of Modern Modalities

We differentiate between ‘traditional’ and ‘modern’ modalities.

**Traditional** We classified chemotherapy, radiotherapy, and surgery as ‘traditional’ treatment modalities as they have been available for many years. We also classified ultrasound and x-ray as ‘traditional’ imaging modalities given their long history of use: x-rays were invented in the 19th century, and the first clinical application of breast ultrasound was reported in 1954 (Dempsey 2004).

**Modern** Here we list the ‘modern’ modalities and period of introduction:

- Targeted therapy: The first targeted cancer therapy was tamoxifen, which was approved in 1977 for the management of metastatic breast cancer (Meisel 2018).
- CT: The first machines were installed between 1974 and 1976, with whole-body systems becoming available in 1976 (DecodingScience 2019).
- MRI: The first commercial MRI scanner was produced in 1980 (US Dept of Energy 2009).
- PET: The first whole-body PET scanner appeared in 1977 (US Dept of Energy 2009).
- SPECT: While SPECT was introduced in the 1950s and is older than most other imaging modalities, it did not come into widespread use until the 1980s (Matthews 2006).

References:

DecodingScience. CT Scan: Computed Axial Tomography (CAT) Scan. <https://www.decodedscience.org/ct-scan-computed-axial-tomography-cat-scan/>

Dempsey PJ. The history of breast ultrasound. *J Ultrasound Med* 2004; 23(7): 887-94.

Matthews M. The Story of SPECT. *Axis Imaging News* 2006. <https://www.axisimagingnews.com/radiology-products/imaging-equipment/ct/the-story-of-spect>

Meisel JL, Venur VA, Gnant M, Carey L. Evolution of Targeted Therapy in Breast Cancer: Where Precision Medicine Began. *Am Soc Clin Oncol Educ Book* 2018; 38: 78-86.

U.S. Department of Energy. Molecular Nuclear Medicine Legacy. <https://www.doemedicalsciences.org/historypetmri.shtml>

To estimate priors for the potential impact of modern modalities, we analyzed trends in 5-year net cancer survival in SEER from 1973 to 2014. For example, prostate cancer survival was 60% in 1973-74, before targeted therapy and technologies such as MRI and PET were available. We can therefore set a bound of ~40% for the maximum probability that these newer modalities are necessary for prostate cancer survival.

Here we plot the trends in survival based on SEER data. We used SEER Historic Stage A (Local/Regional/Distant) as it was the only staging system available for historic data.

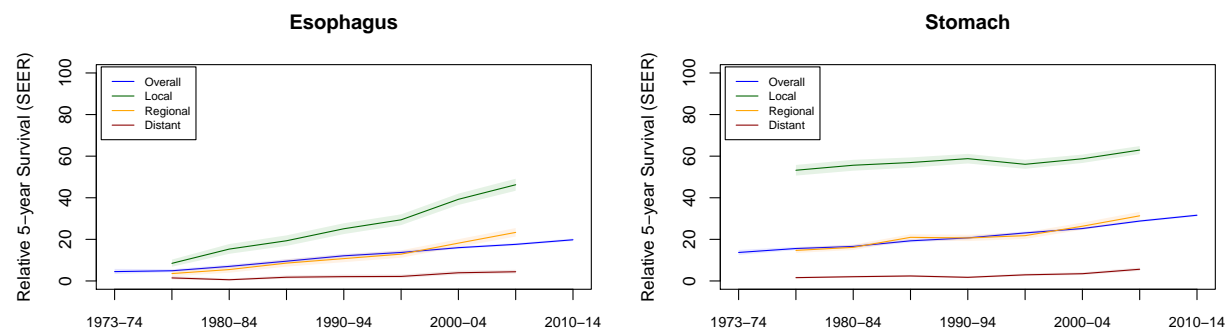

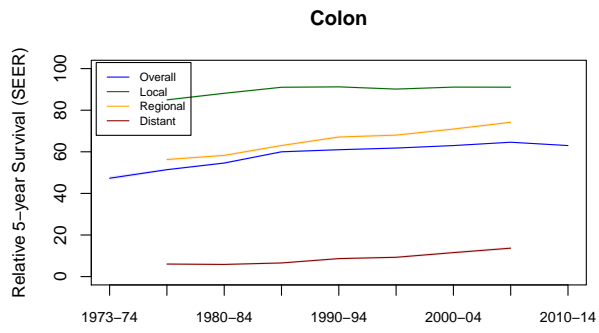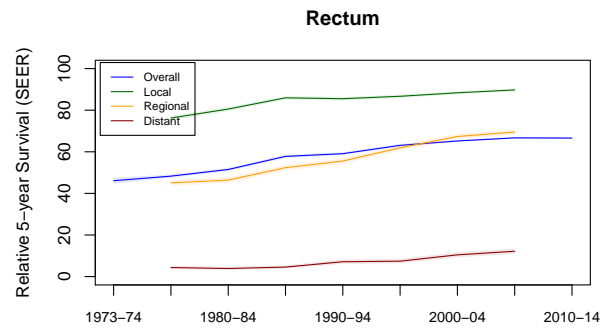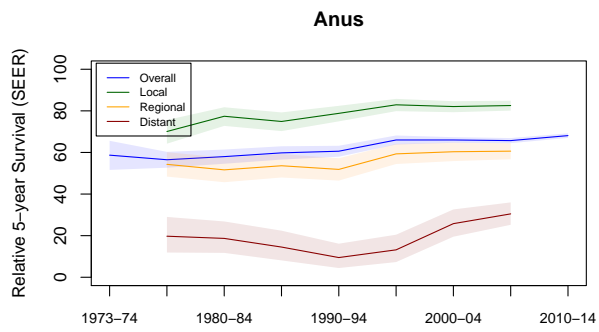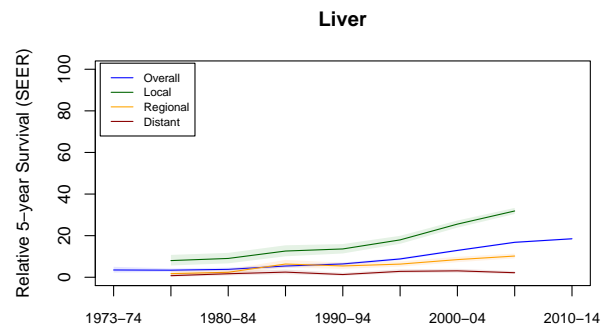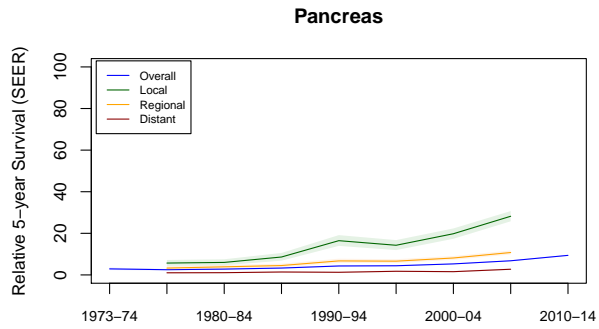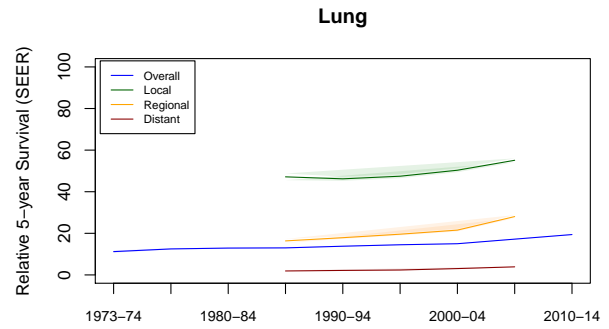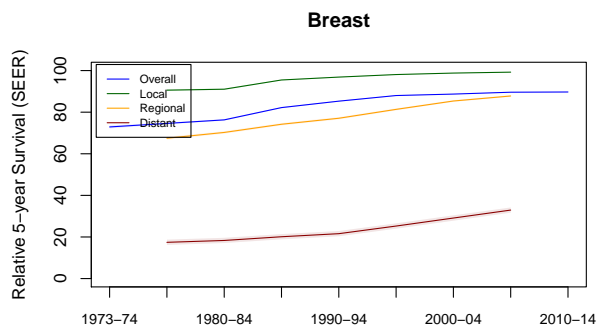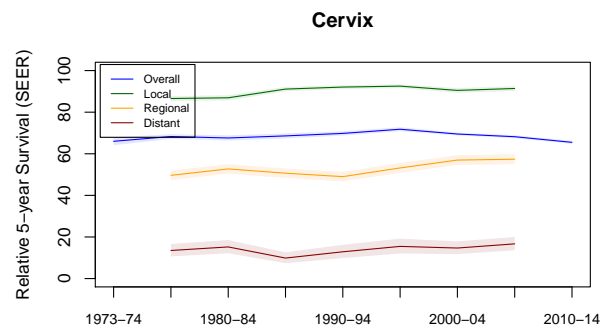



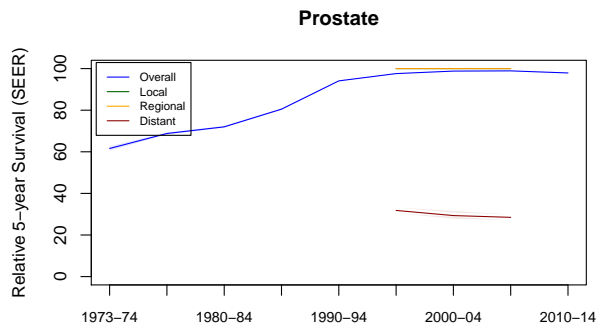

To estimate priors, we sampled survival probabilities (based on the SEER data) for the earliest ( $s_1$ ) and latest periods ( $s_2$ ) available for each cancer. With these probabilities, we calculated the proportion of current survival that could be achieved before the modern period ( $p = s_1/s_2$ ), and used the complement ( $1 - p$ ) to estimate the probability of needing modern modalities. We sampled 1000 pairs of survival probabilities to estimate uncertainty around the probability of needing modern modalities.

We estimated priors by stage, except for prostate cancer for which we used overall trends in survival due to lack of stage data in the 1970s. When setting priors we assumed that SEER Historic Stage Local corresponds to Stage I, Regional corresponds to Stages II-III, and Distant corresponds to Stage IV. Probabilities for each stage (I-IV) were sampled independently in the model. We logit-transformed the priors to allow unconstrained sampling.

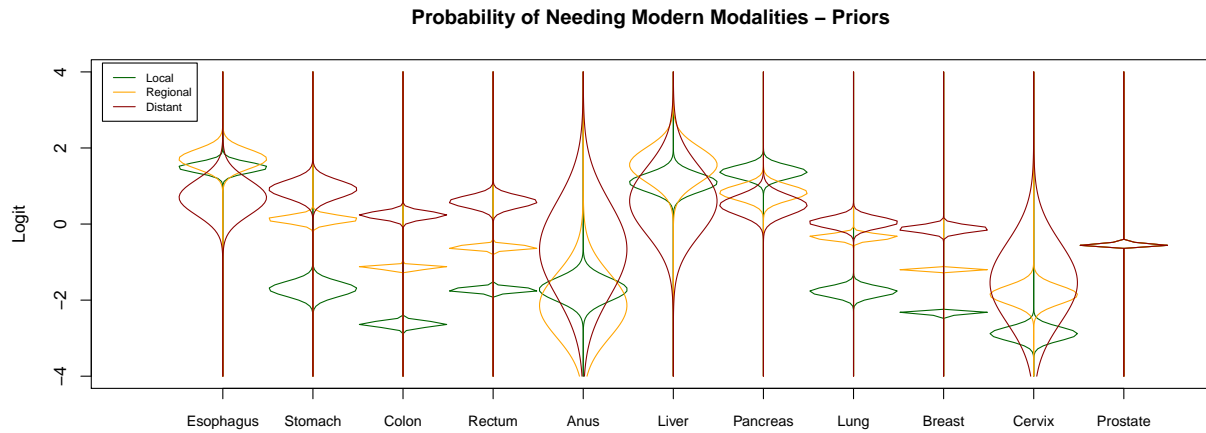

## 1.7 Chemotherapy

We used estimates of chemotherapy availability from a global survey of paediatric oncologists. While the chemotherapy agents used for childhood cancers may differ from agents used for adults cancers, we assume that the relative availability of agents in each country is similar, and so use these estimates as a proxy. Estimates were available for 94 countries. We used a hierarchical model and set priors based on these empirical estimates, weighted by the number of respondents in each country.

Reference: Cohen P, Friedrich P, Lam C, et al. Global access to essential medicines for childhood cancer: a cross-sectional survey. *J Glob Oncol* 2018; 4: 1–11.

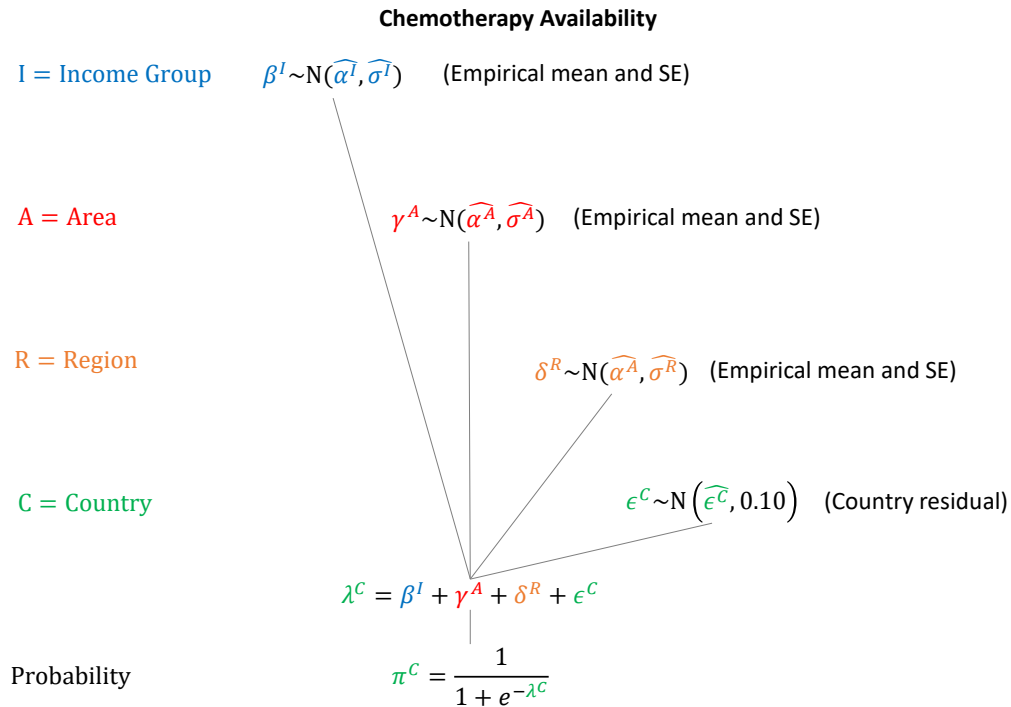

Here we plot the estimated prior distributions (in logit space).

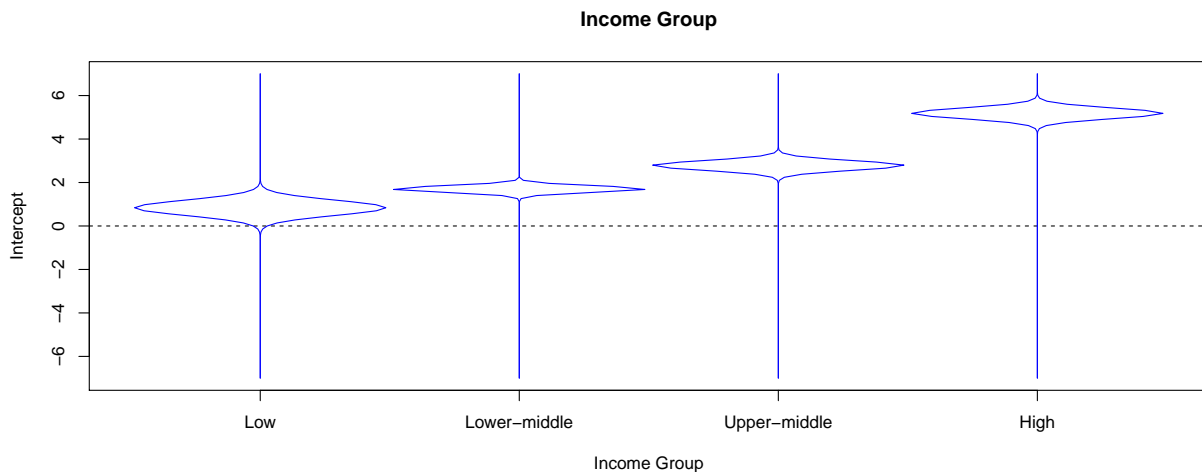

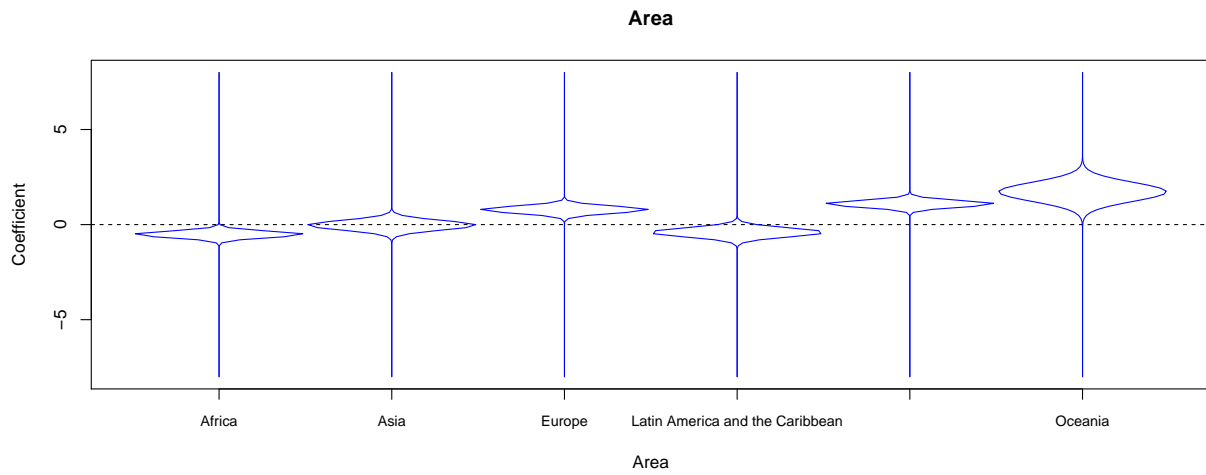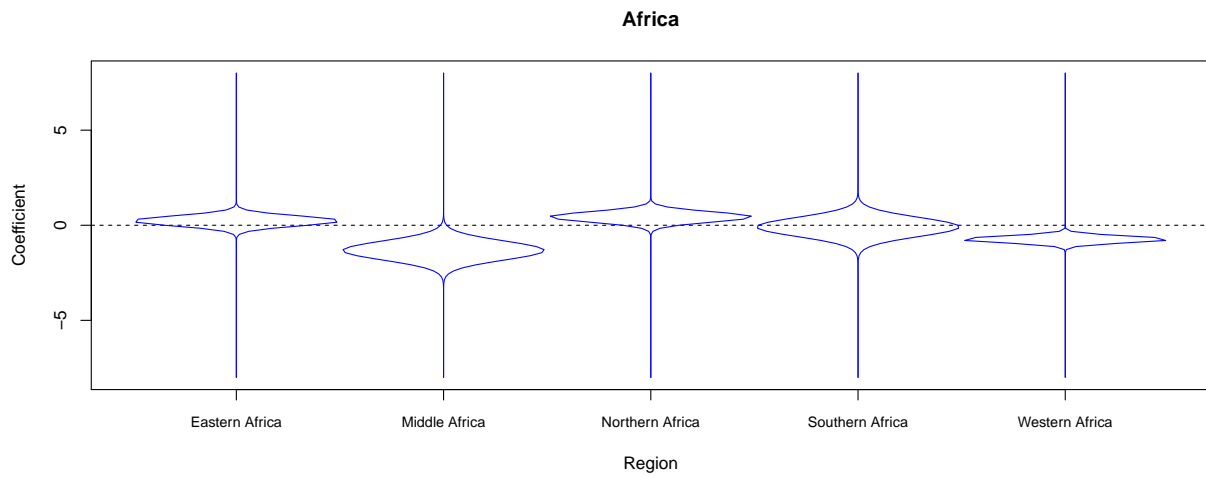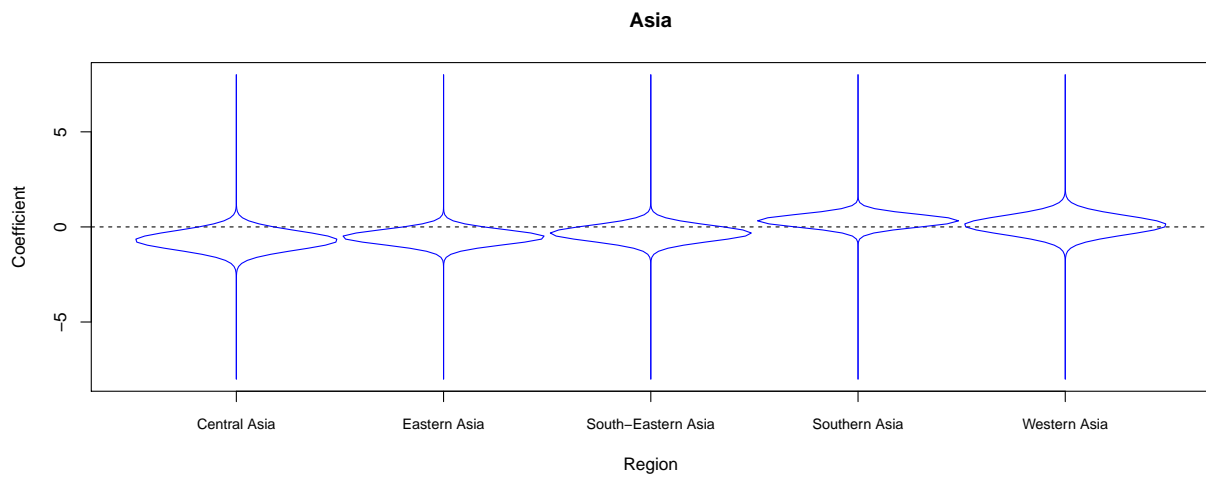

### Europe

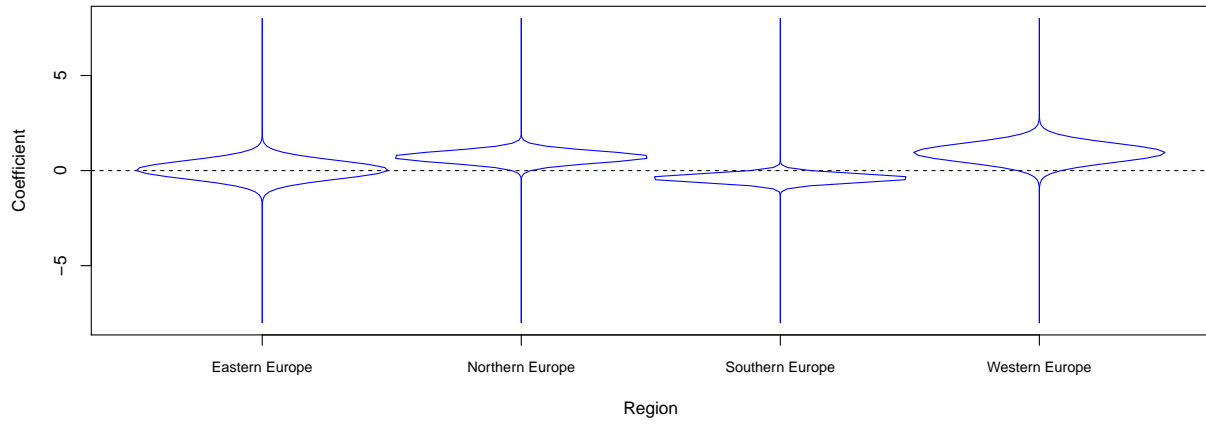

### Latin America and the Caribbean

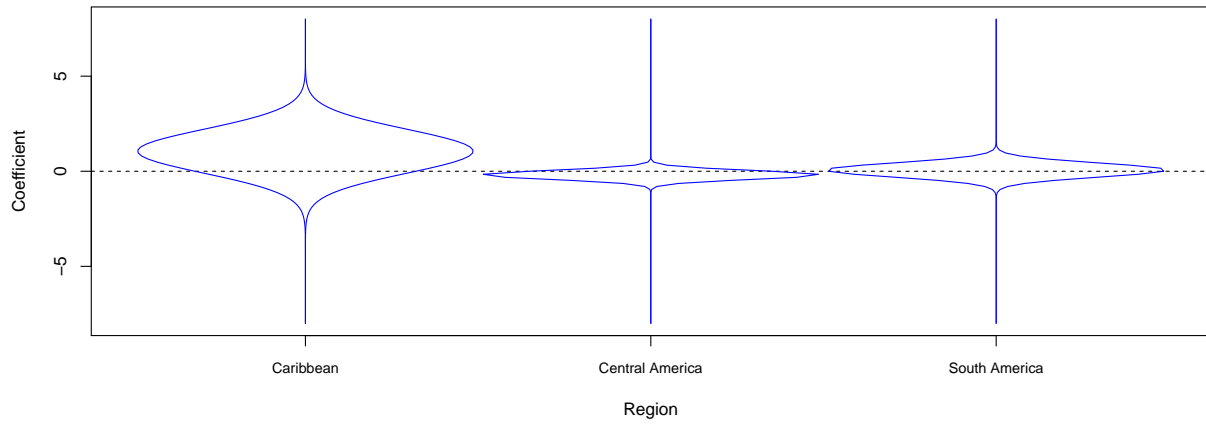

### Northern America

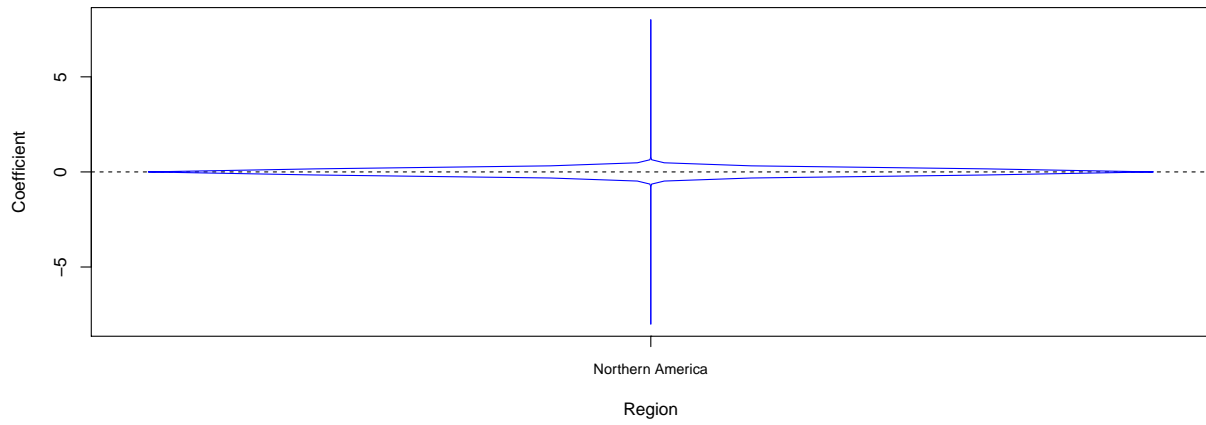

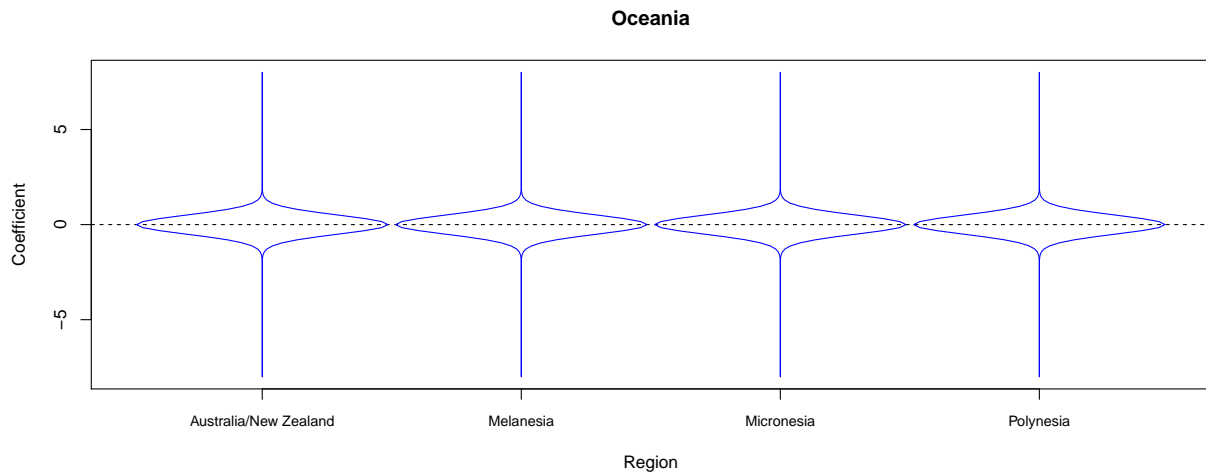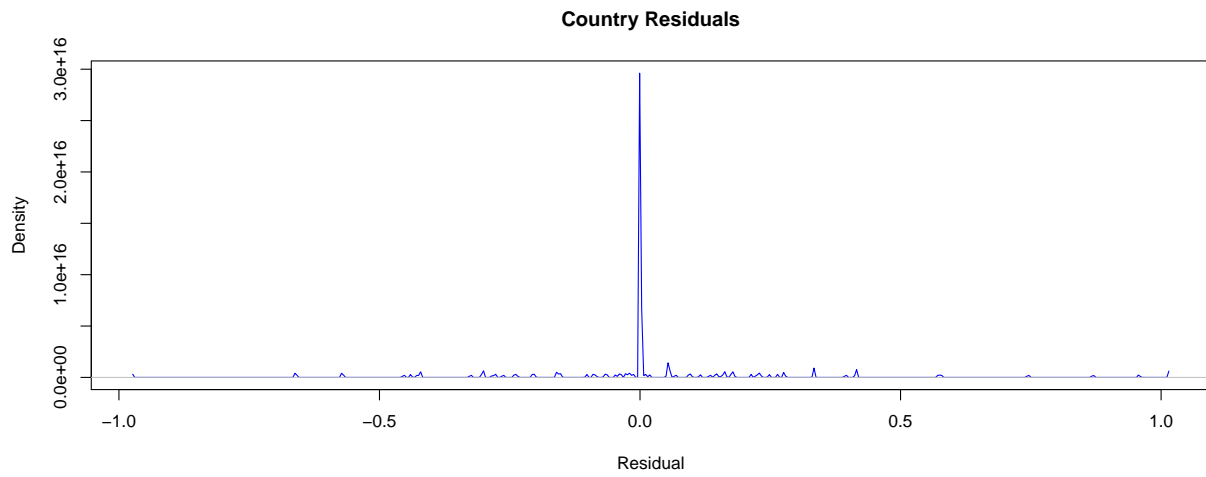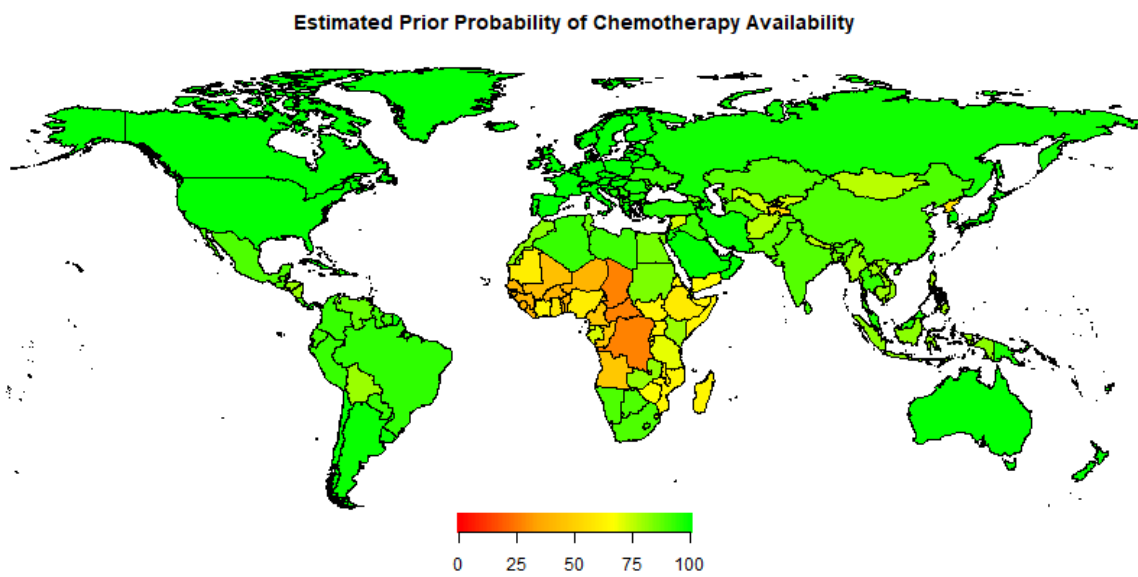

## 1.8 Radiotherapy

Estimates of radiotherapy availability were based on modeled estimates from the Lancet Radiotherapy Commission for 173 countries. We used the 12-hour coverage estimates to update the hierarchical models to estimate availability of radiation.

Reported coverages were bounded in  $[0.001, 0.999]$  and then transformed using a logit transformation  $(\log \frac{x}{1-x})$  so that they were unconstrained.

Reference: Atun R, Jaffray DA, Barton MB, et al. Expanding global access to radiotherapy. *Lancet Oncol* 2015; 16(10): 1153-86.

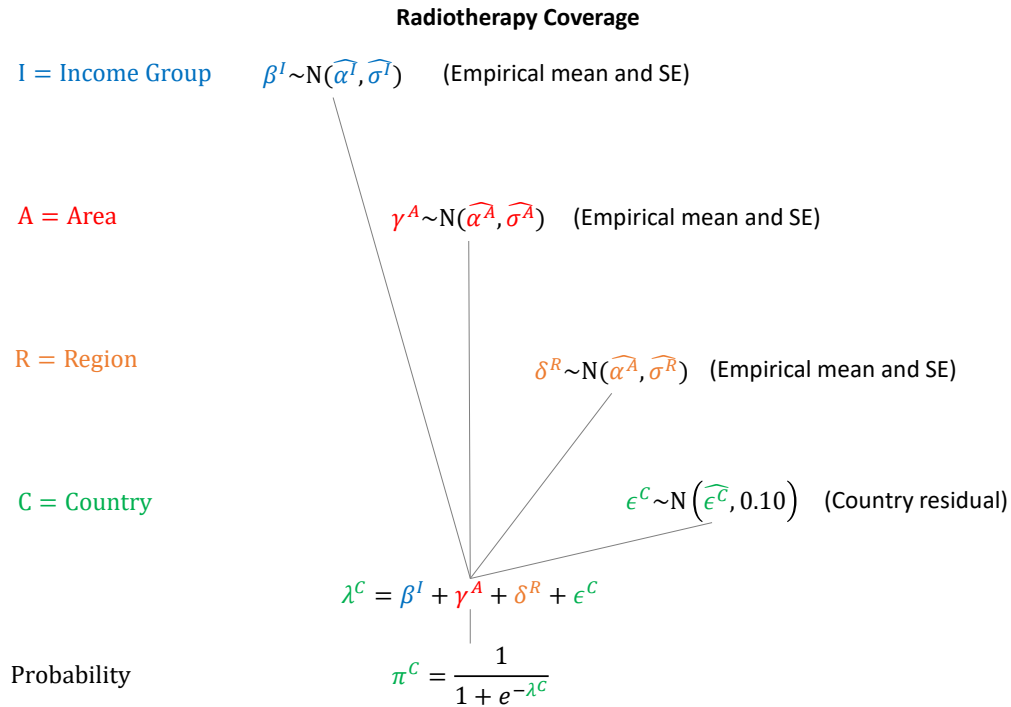

Here we plot the estimated prior distributions (in logit space).

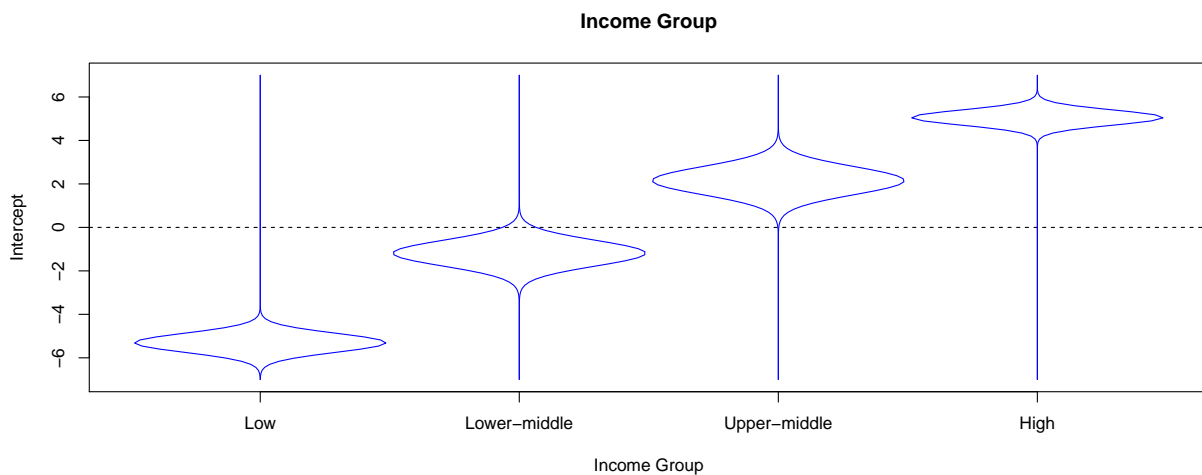

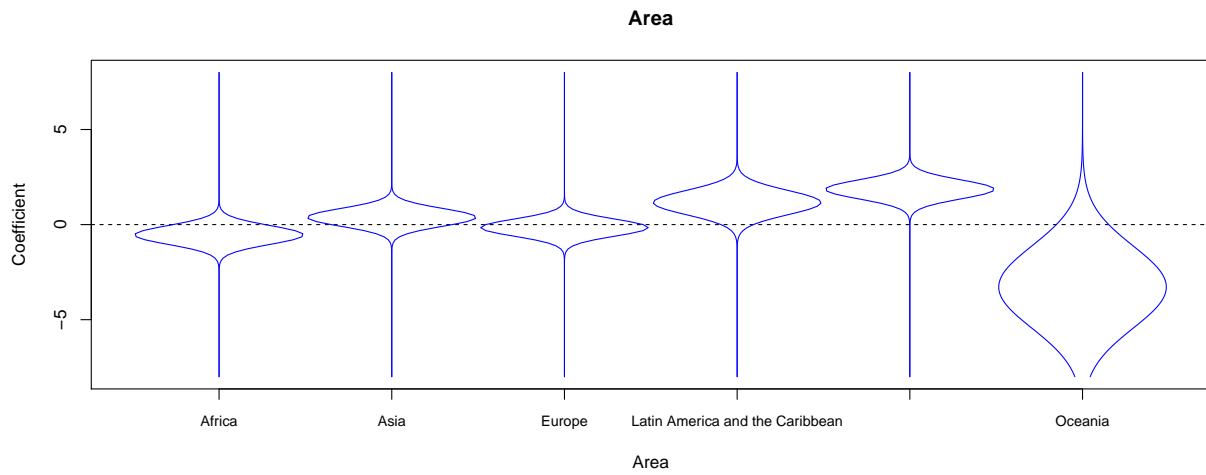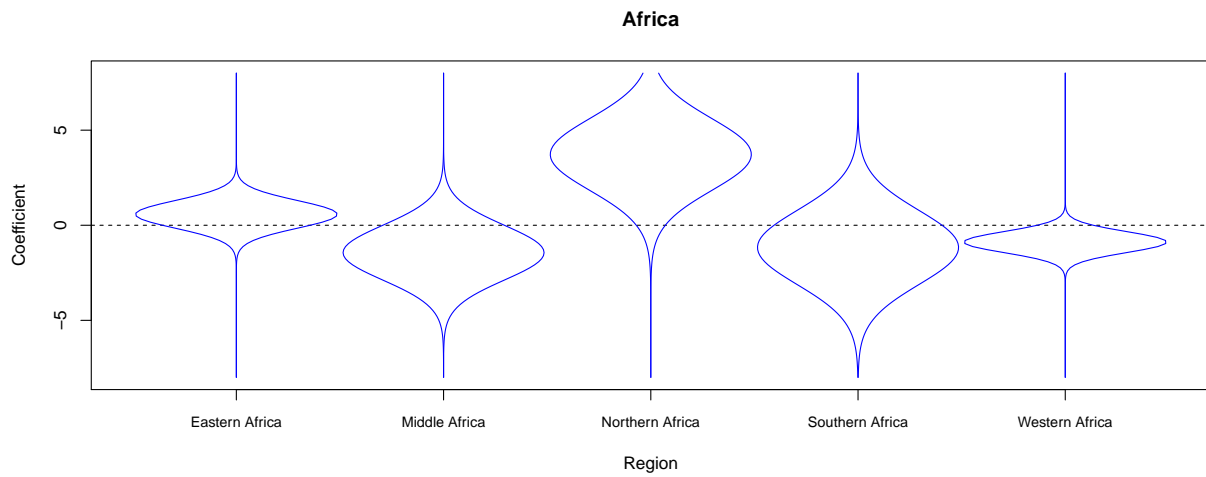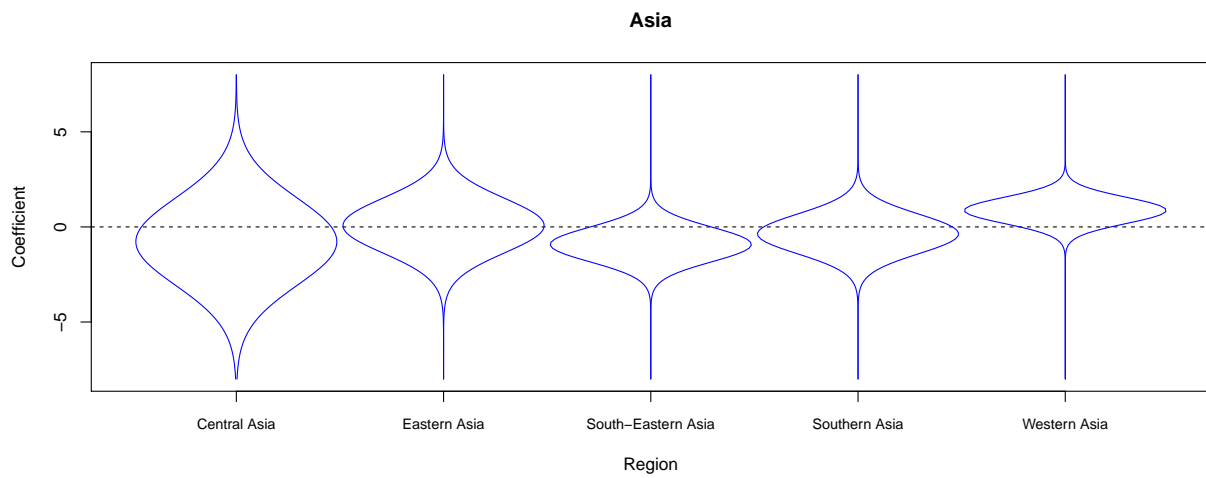

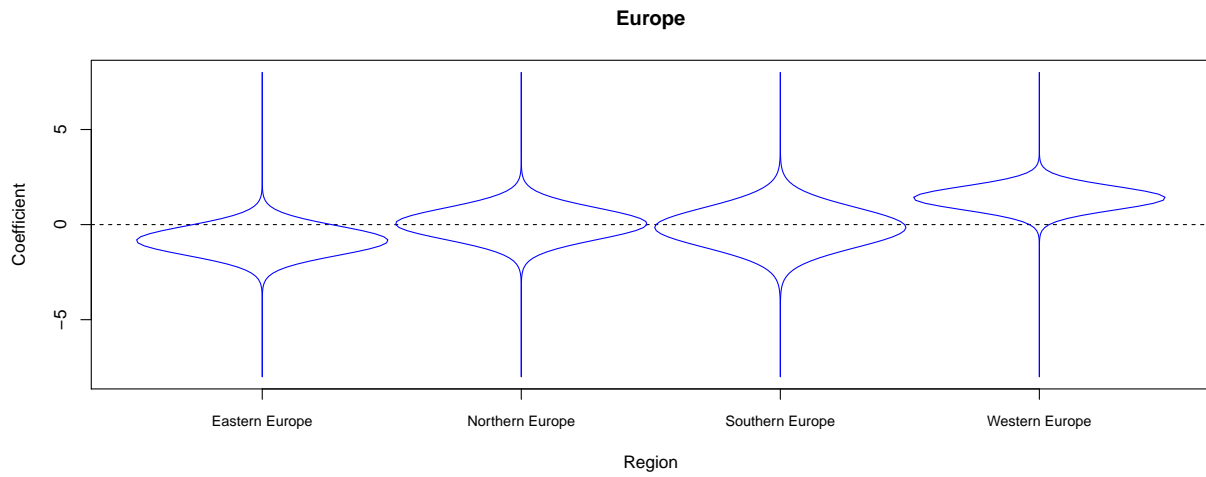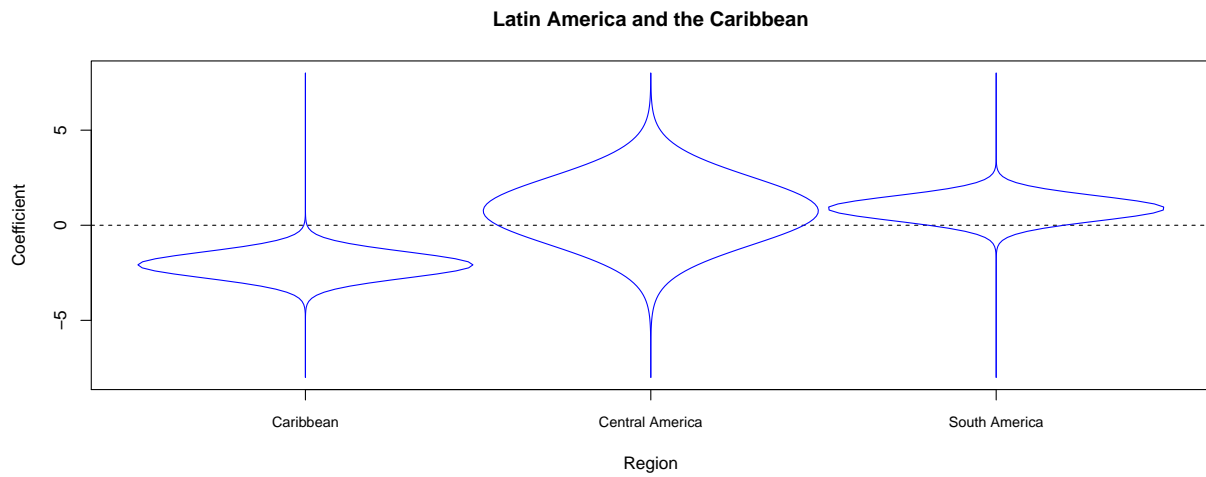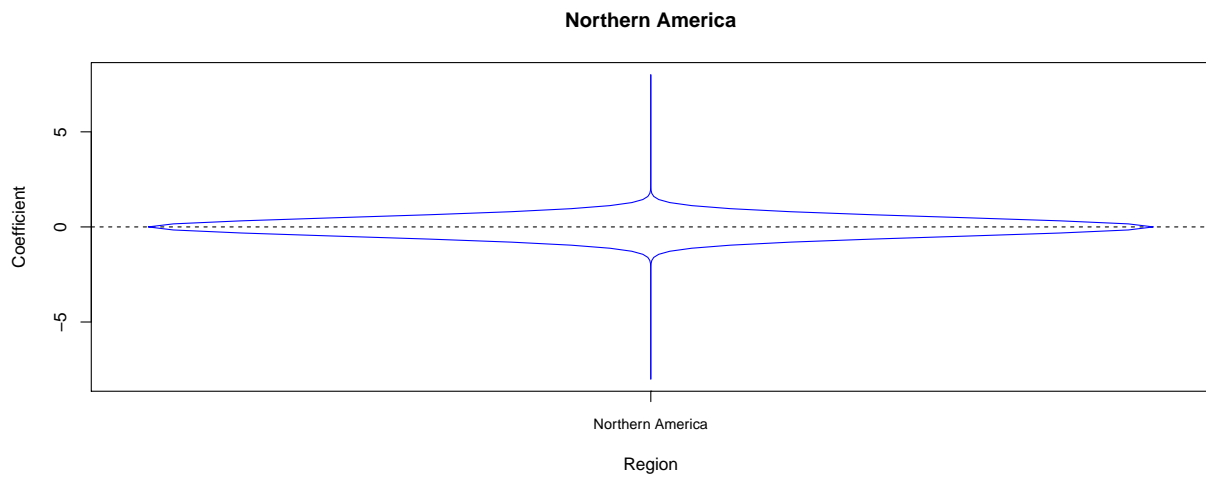



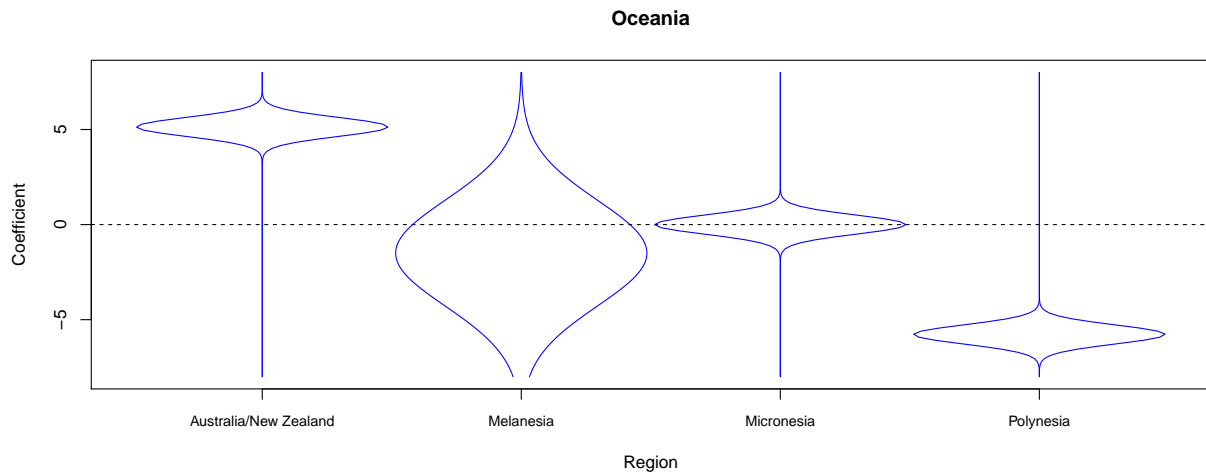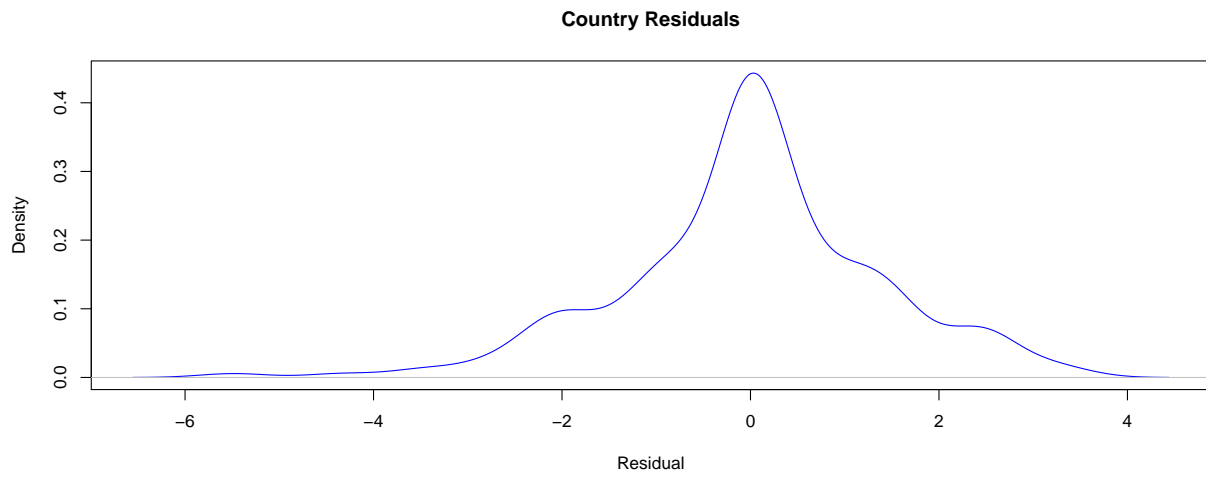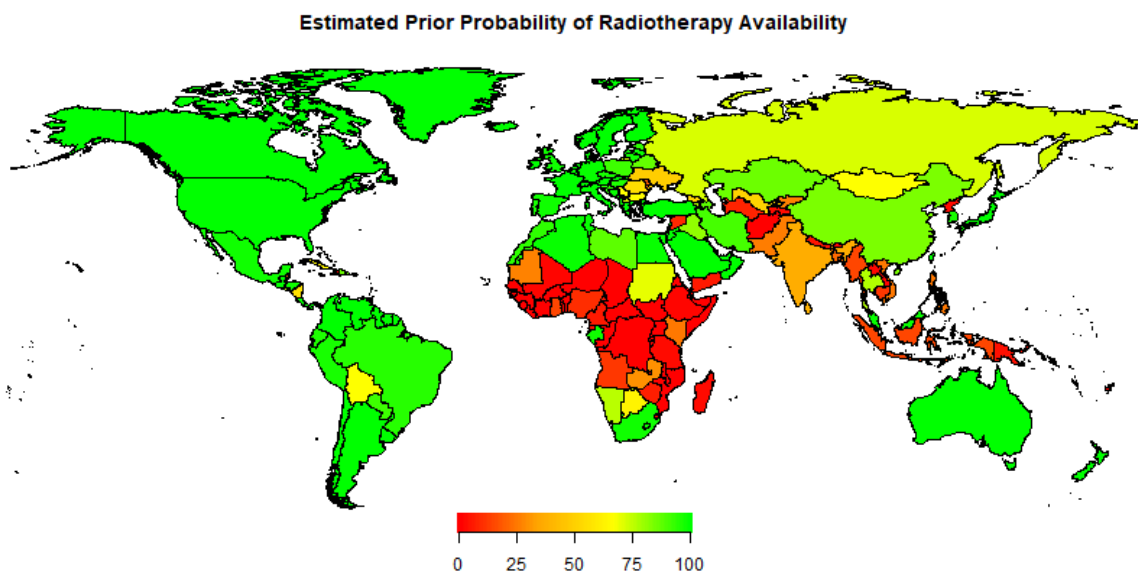

## 1.9 Surgery

For surgery we used estimates from a modeling study of the Lancet Surgery Commission which had modeled estimates for 184 countries. We used the estimates that assumed ‘Capacity’ was the only barrier to surgery, since we are already modeling cancer treatment conditional on successful access and referral within the health system.

Reported estimates were bounded in  $[0.001, 0.999]$  and then transformed using a logit transformation  $(\log \frac{x}{1-x})$  so that they were unconstrained.

Reference: Alkire BC, Raykar NP, Shrima MG, et al. Global access to surgical care: a modelling study. Lancet Glob Health 2015; 3(6): e316-23.

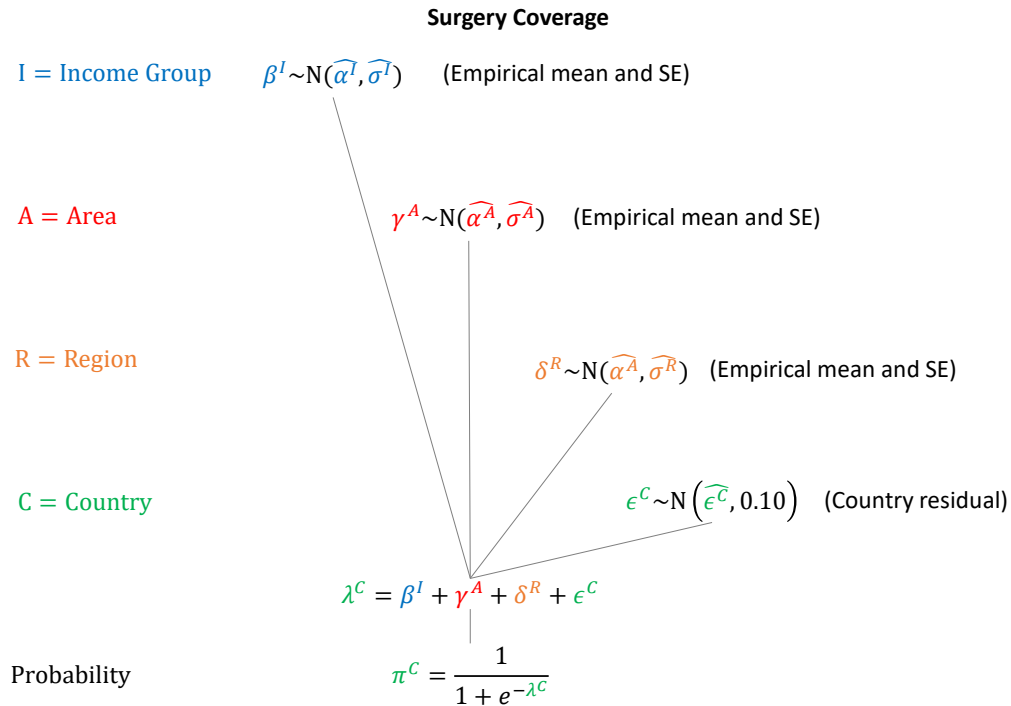

Here we plot the estimated prior distributions (in logit space).

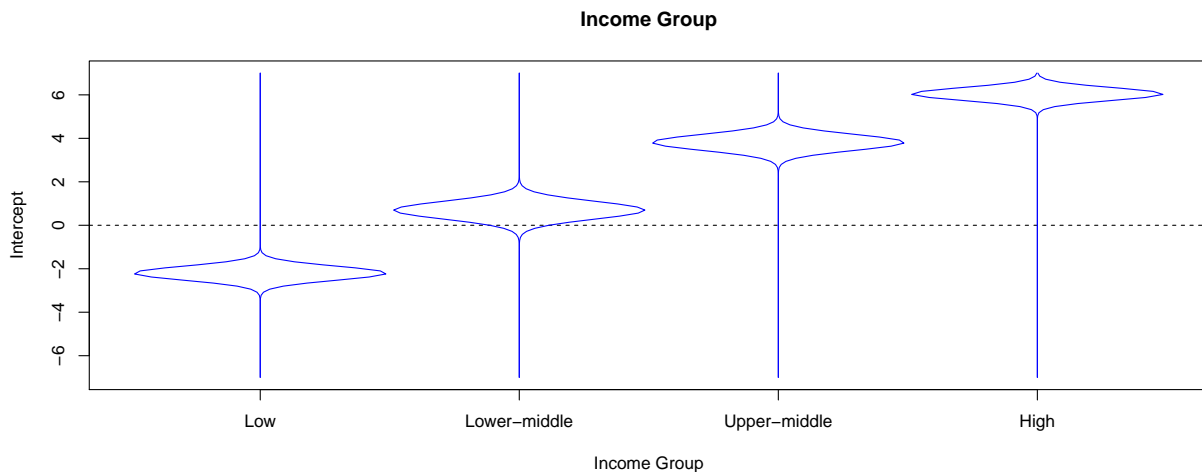

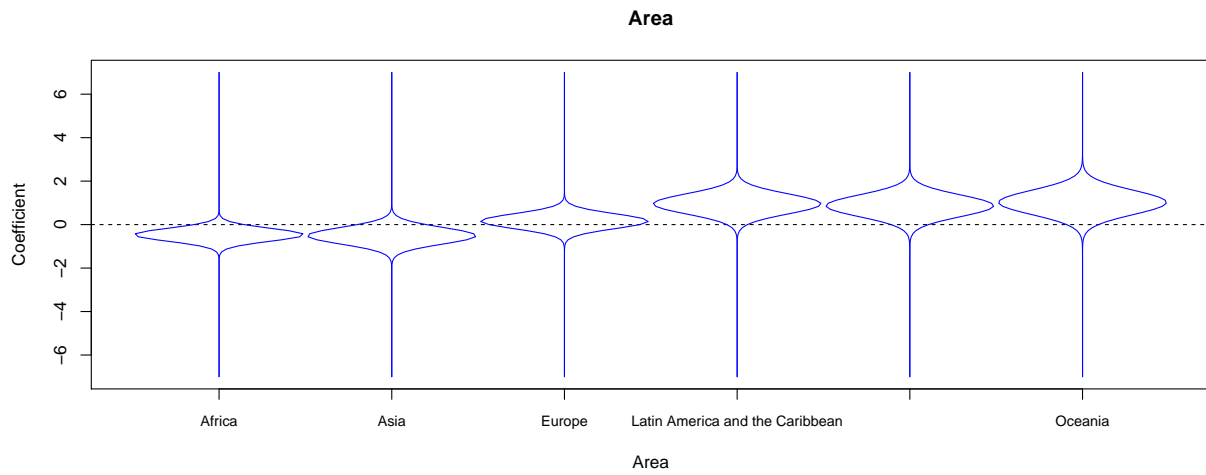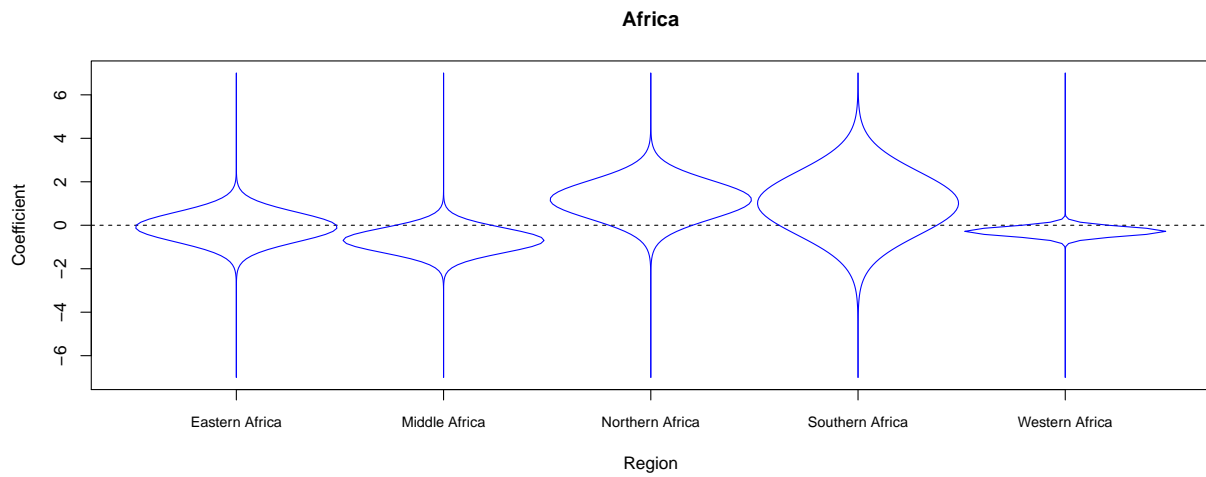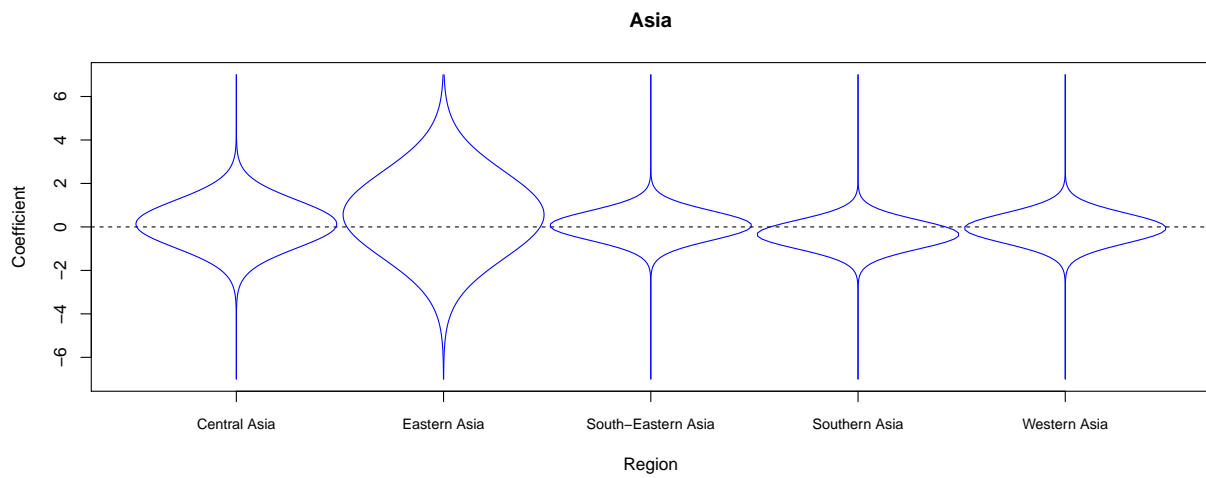

### Europe

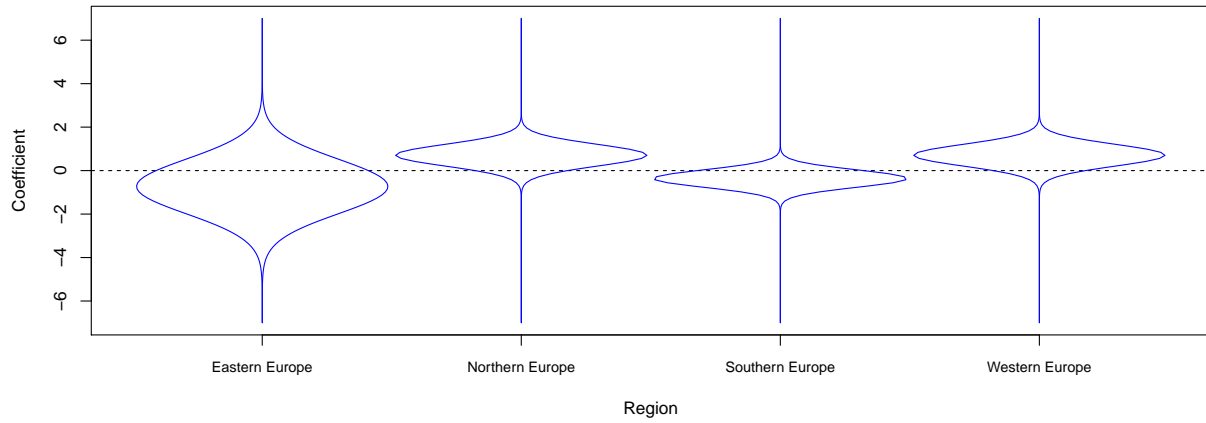

### Latin America and the Caribbean

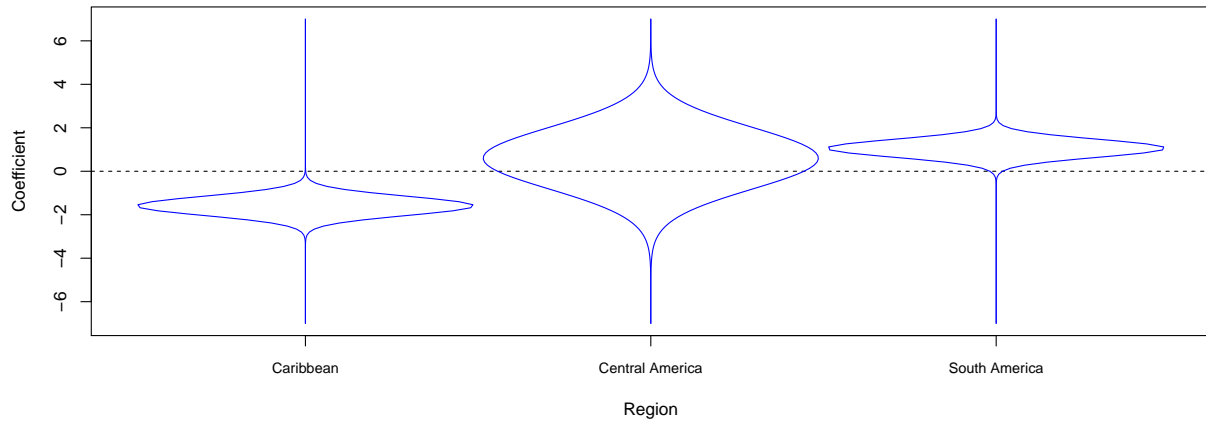

### Northern America

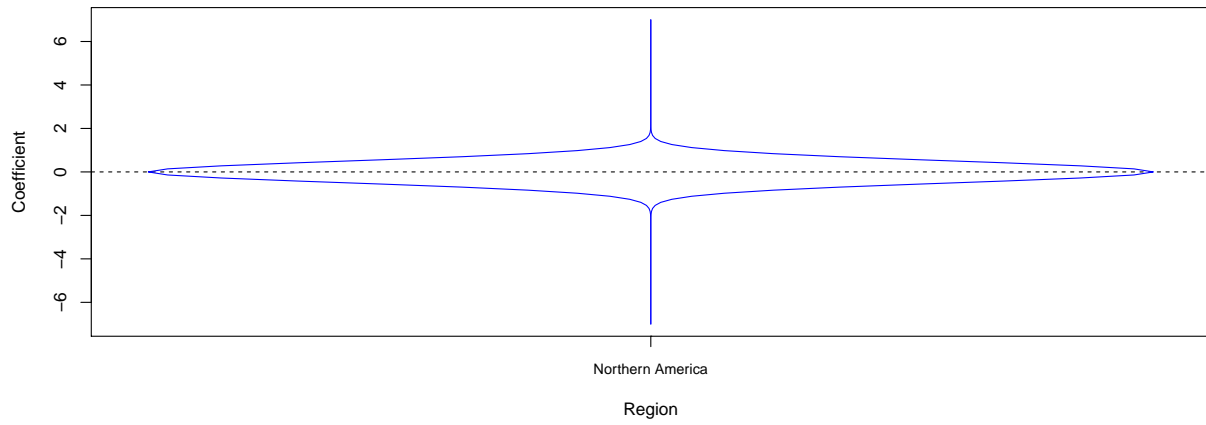

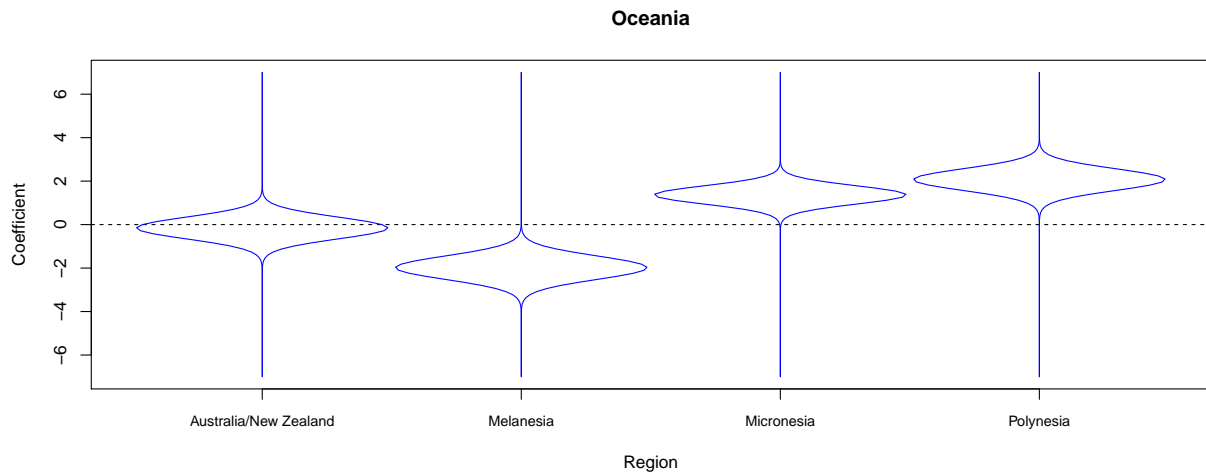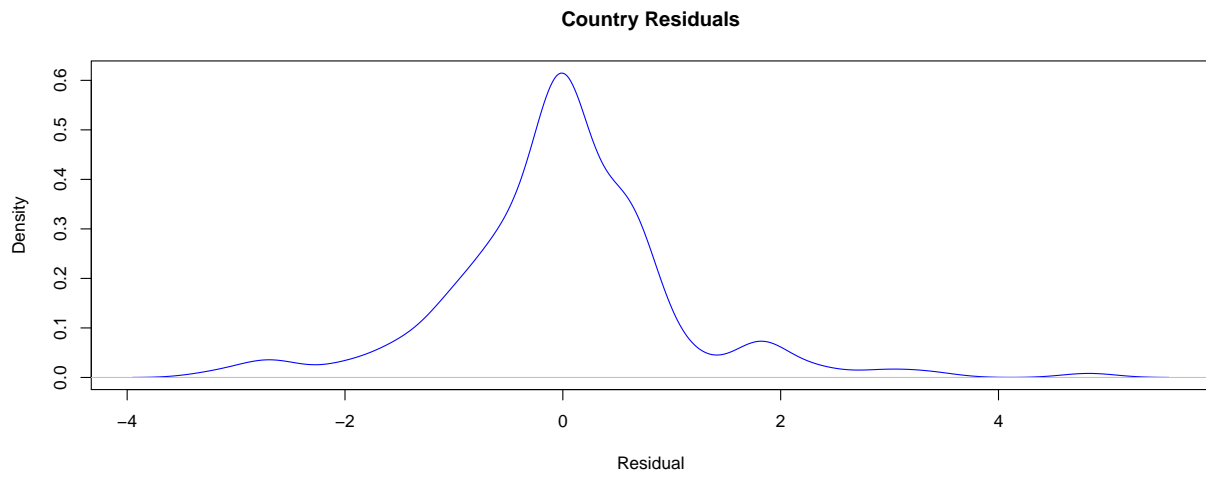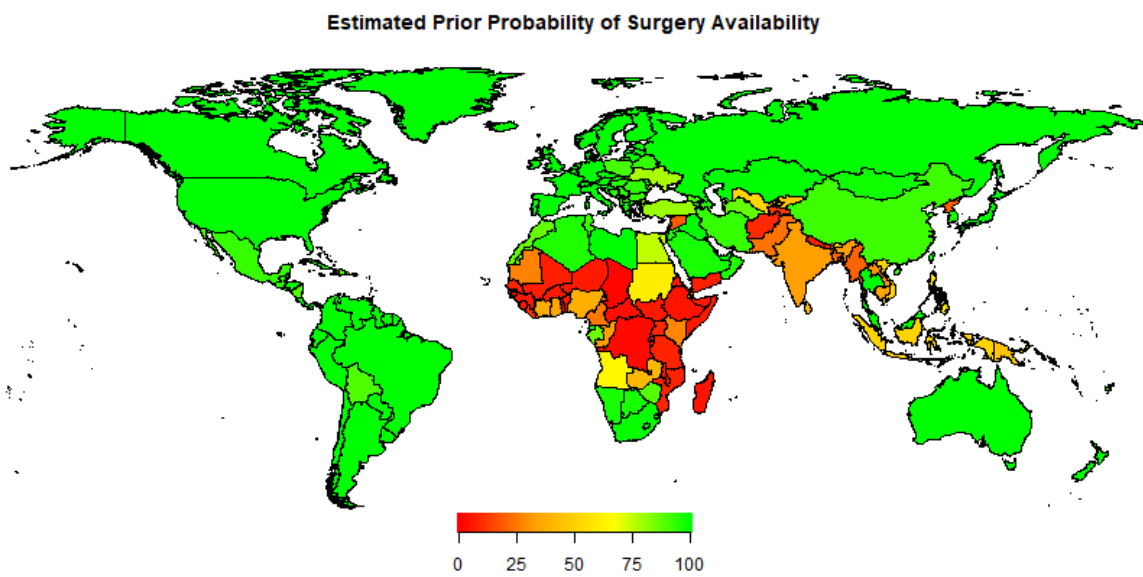

## 1.10 Targeted Therapy

Data on the availability of targeted therapy in low- and middle-income countries are scarce, but estimates that are available suggest that patients have limited access to targeted therapy, usually because of the high cost of these therapies (Yip 2015). For example, among 49 new oncology medicines launched between 2010 and 2014, patients in only 6 countries had access to at least half of these drugs (IMS 2016). Furthermore, such drugs are often only accessible for a privileged minority of the population with private health insurance (Ruiz 2017).

We therefore set wide priors by income group, centered at 5%, 25%, 75%, and 95%. When sampling parameters we ensured that the probabilities of targeted therapy availability were lower than for chemotherapy in each country to account for the lack of access to targeted therapy.

References:

IMS Institute for Healthcare Informatics. Global Oncology Trend Report: A Review of 2015 and Outlook to 2020. 2016. Available at: <https://www.iqvia.com/-/media/iqvia/pdfs/institute-reports/global-oncology-trend-report-2016.pdf>.

Ruiz R, Strasser-Weippl K, Touya D, et al. Improving access to high-cost cancer drugs in Latin America: Much to be done. *Cancer* 2017; 123(8): 1313-1323.

Yip CH, Buccimazza I, Hartman M, Deo SV, Cheung PS. Improving outcomes in breast cancer for low and middle income countries. *World J Surg* 2015; 39(3): 686-92.

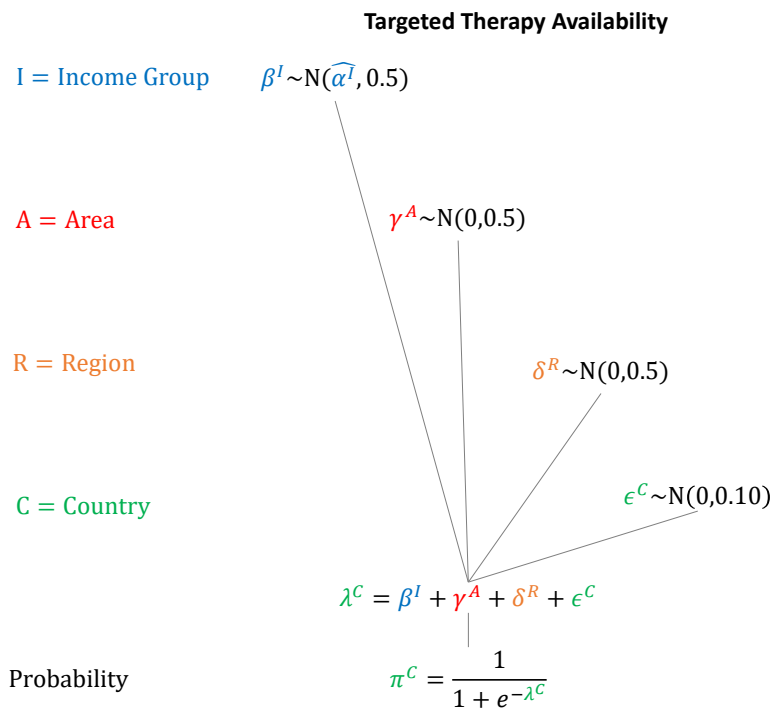

Here we plot the estimated prior distributions (in logit space).

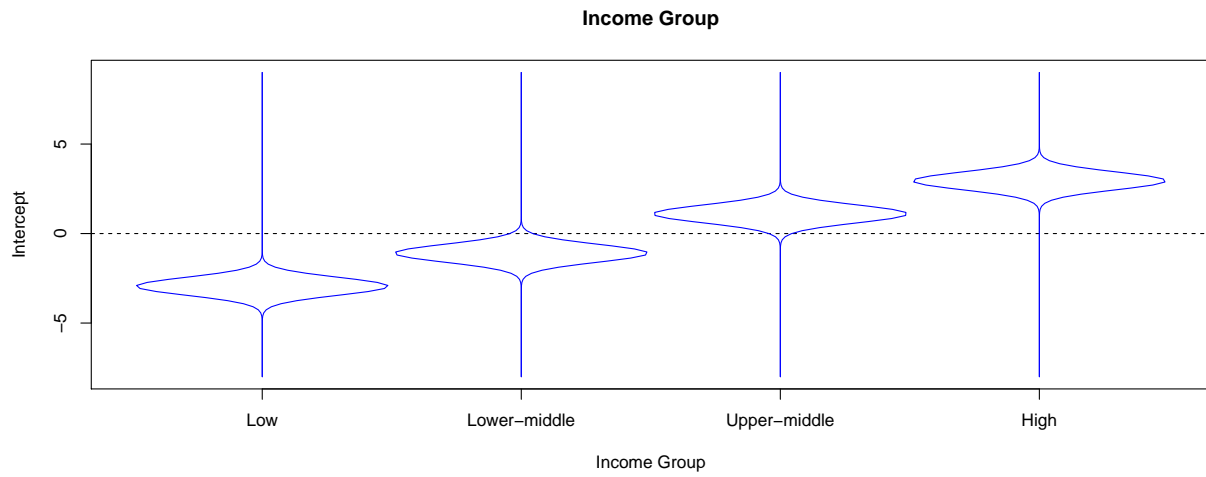

## 1.11 Imaging

The IMAGINE database was created by the International Atomic Energy Agency (IAEA) to contain up-to-date information on medical imaging equipment and workforce at a global level. Data was obtained from IAEA staff and projects, UN partner organizations (e.g. WHO, IARC, UNSCEAR, UNDP and OECD), national and regional radiology and nuclear medicine professional organizations, expert contributors, and extensive literature reviews.

We obtained estimates of imaging equipment per 1 million population from the IAEA IMAGINE database (received on Jan 14, 2020). We put a floor of 0.001 on these estimates and log-transformed them.

Estimates were available for the following number of countries included in the model:

| Modality   | # countries |
|------------|-------------|
| Ultrasound | 29          |
| X-ray      | 65          |
| CT         | 174         |
| MRI        | 172         |
| PET        | 186         |
| SPECT      | 185         |

Because there are no general guidelines regarding the ideal number of imaging units per population, we set threshold assumptions based on observed data in high-income countries (HIC) with relatively low coverage so as not to overestimate the thresholds needed to ensure availability.

| Modality   | Threshold (per million) | HIC Mean | Examples                                     |
|------------|-------------------------|----------|----------------------------------------------|
| Ultrasound | 40                      | 132.0    | Puerto Rico: 16.6, Bahamas 25.9              |
| X-ray      | 30                      | 110.2    | Puerto Rico: 16.9, Trinidad and Tobago: 21.6 |
| CT         | 10                      | 25.4     | Canada: 15.1, UK: 14.5                       |
| MRI        | 10                      | 16.3     | Canada: 9.9, Czechia: 10.4                   |
| PET        | 1                       | 2.1      | Canada: 1.5, UK: 0.5                         |
| SPECT      | 5                       | 7.7      | UK: 5.7, France: 6.1                         |



### Imaging Equipment Coverage (per 1 million population)

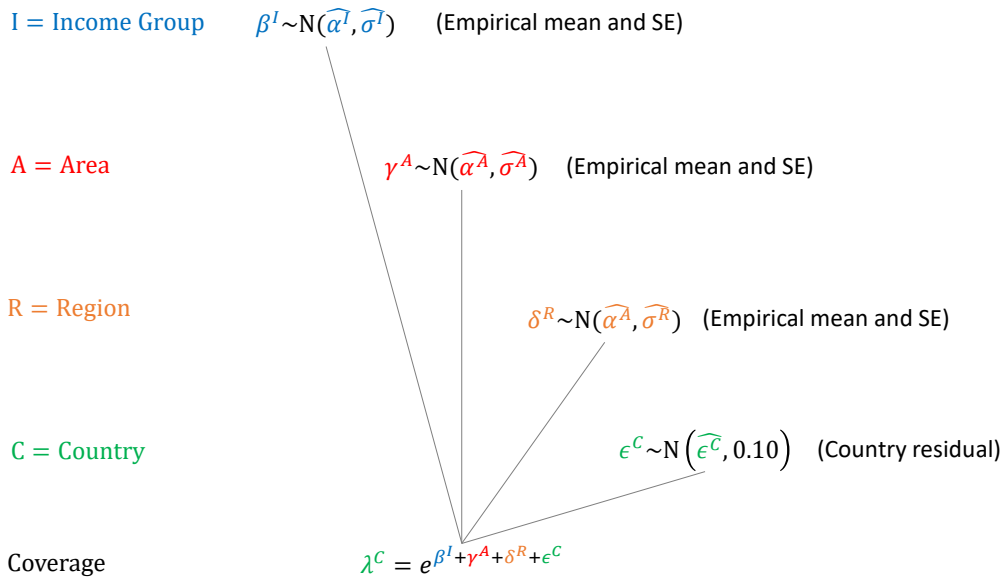

Here we plot the estimated prior distributions (in log space).

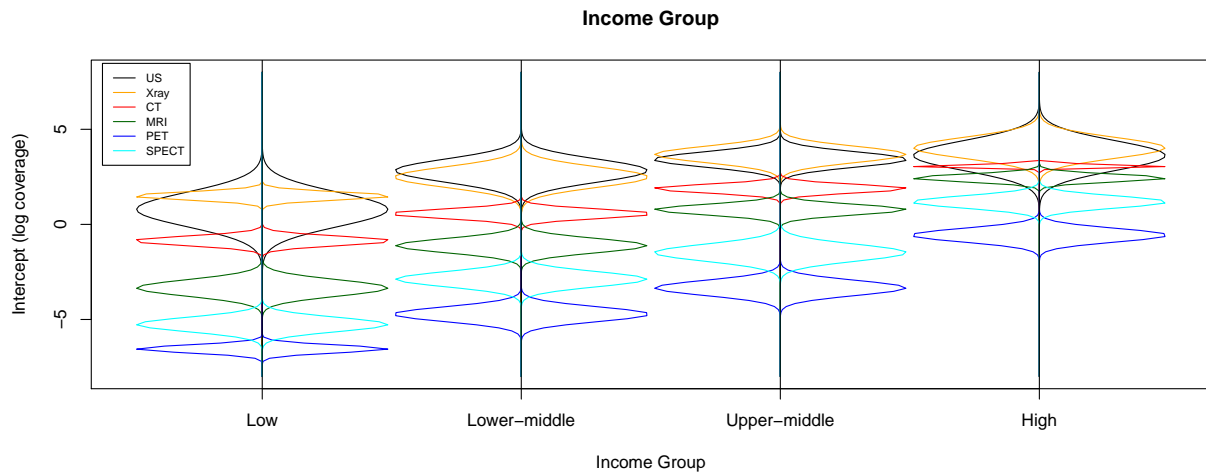

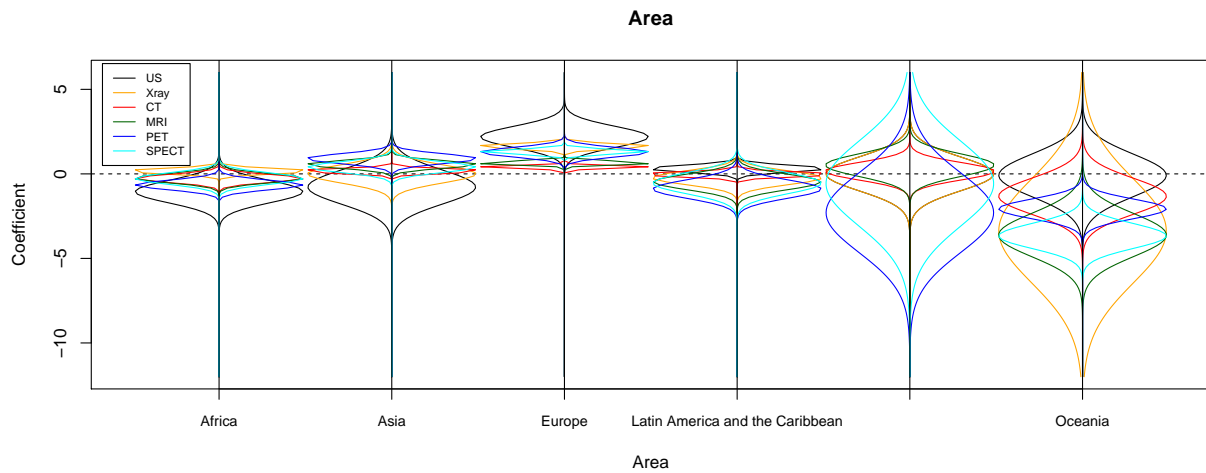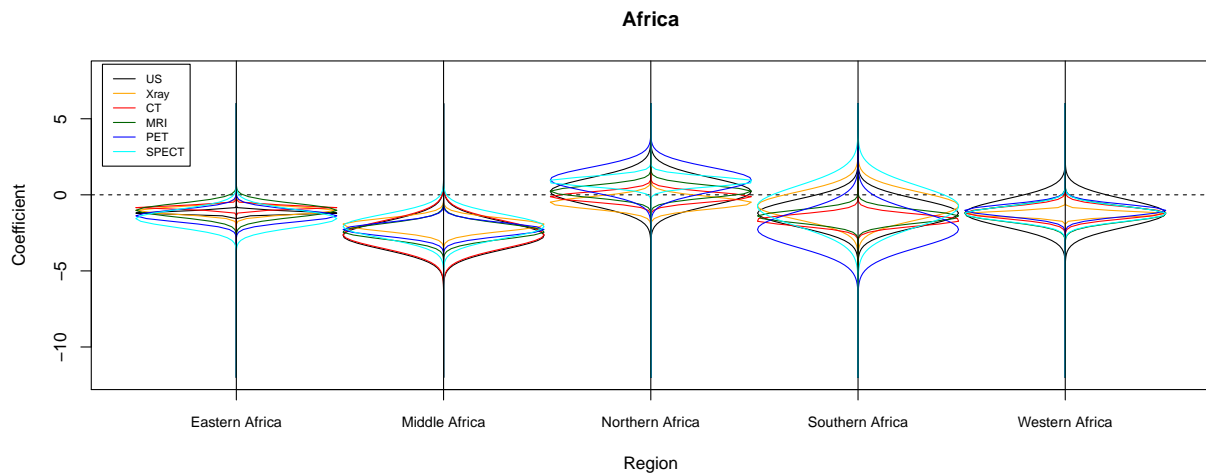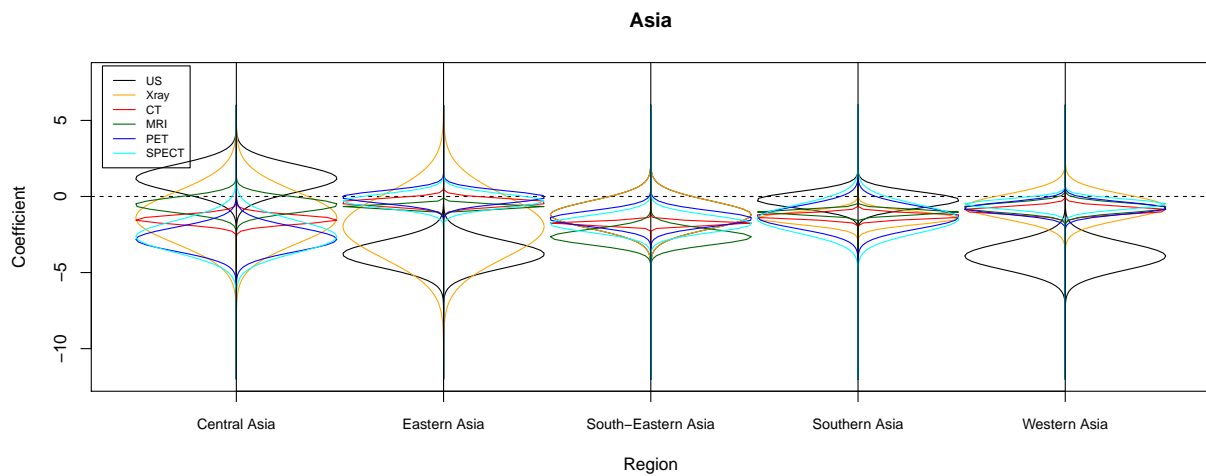

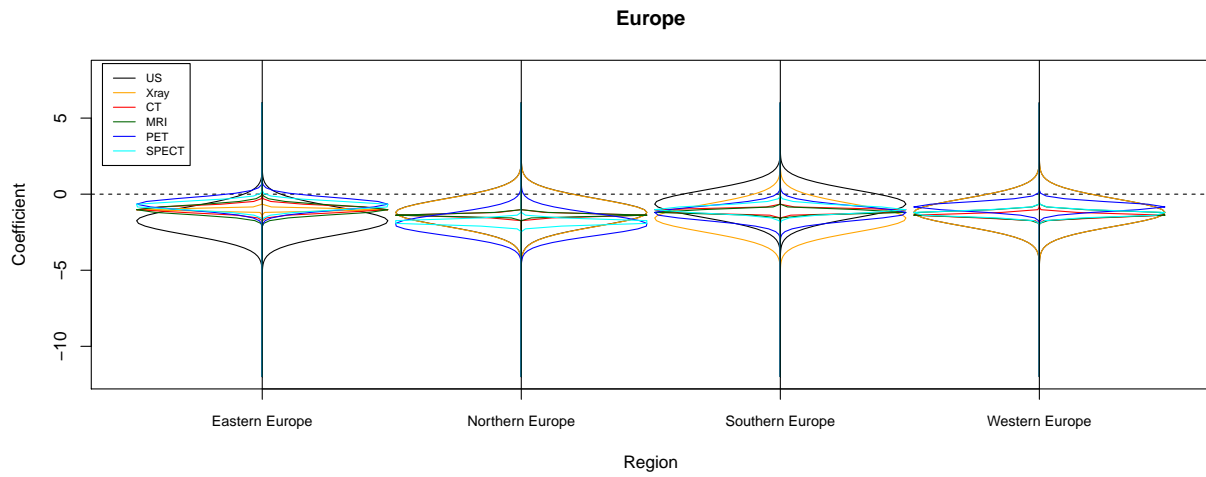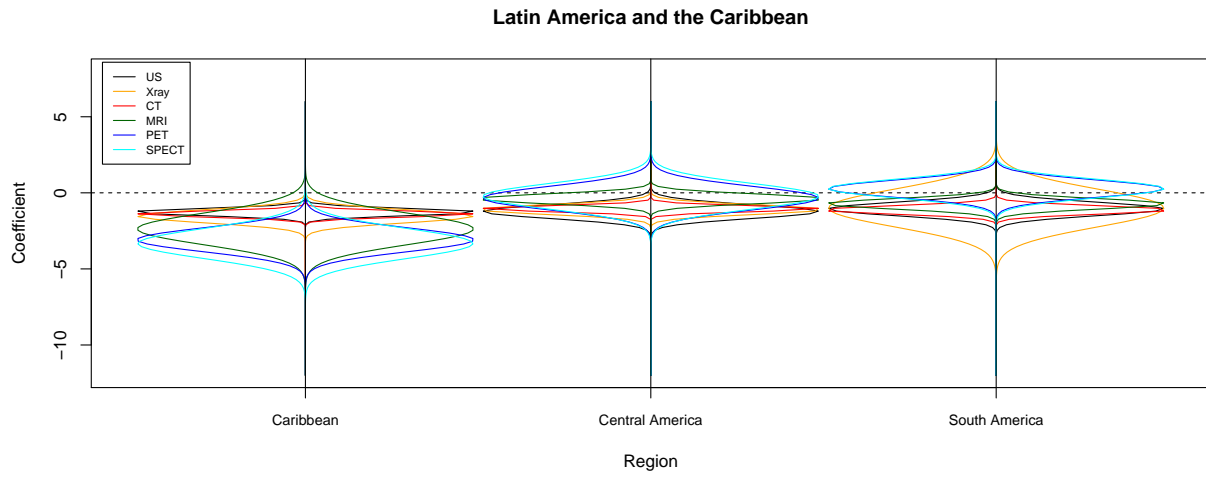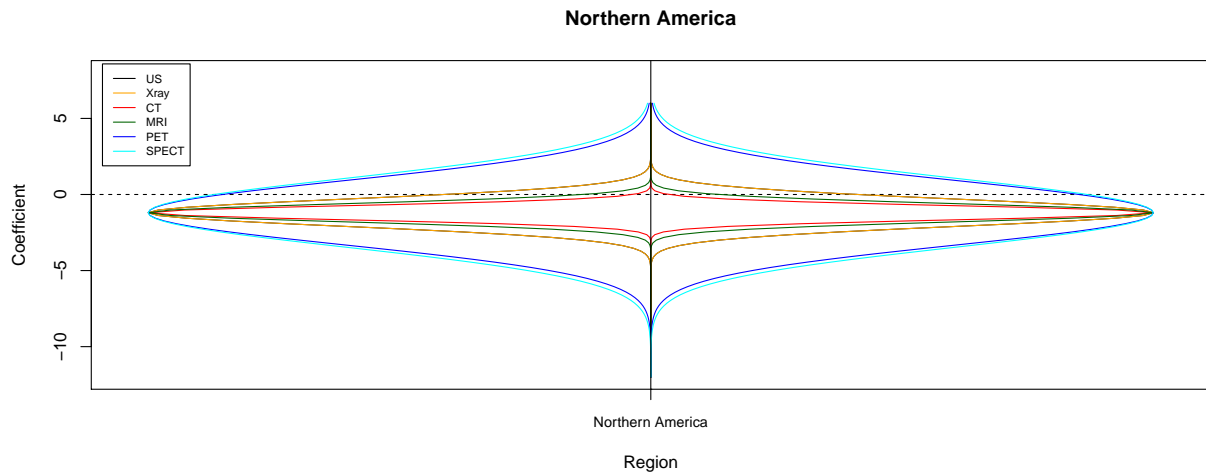

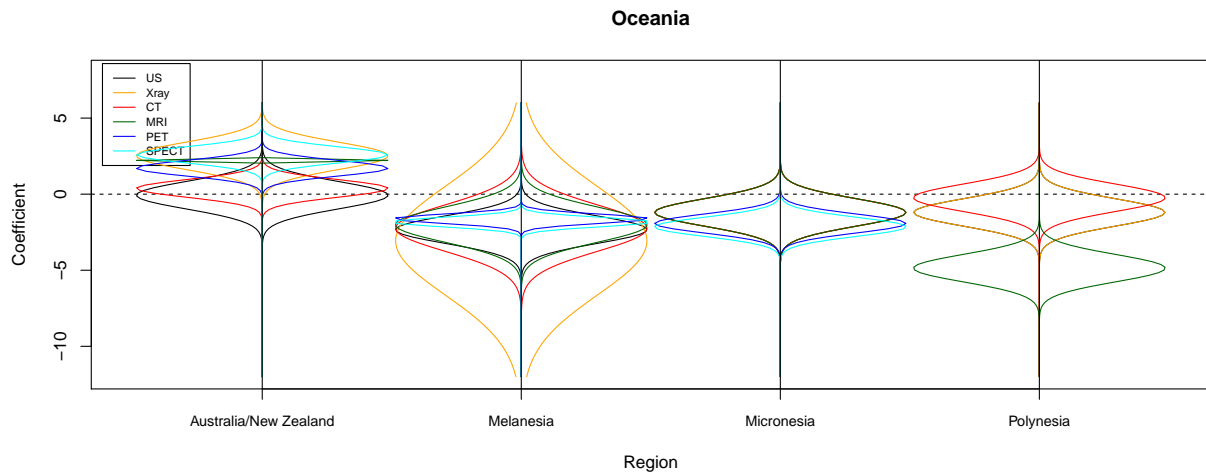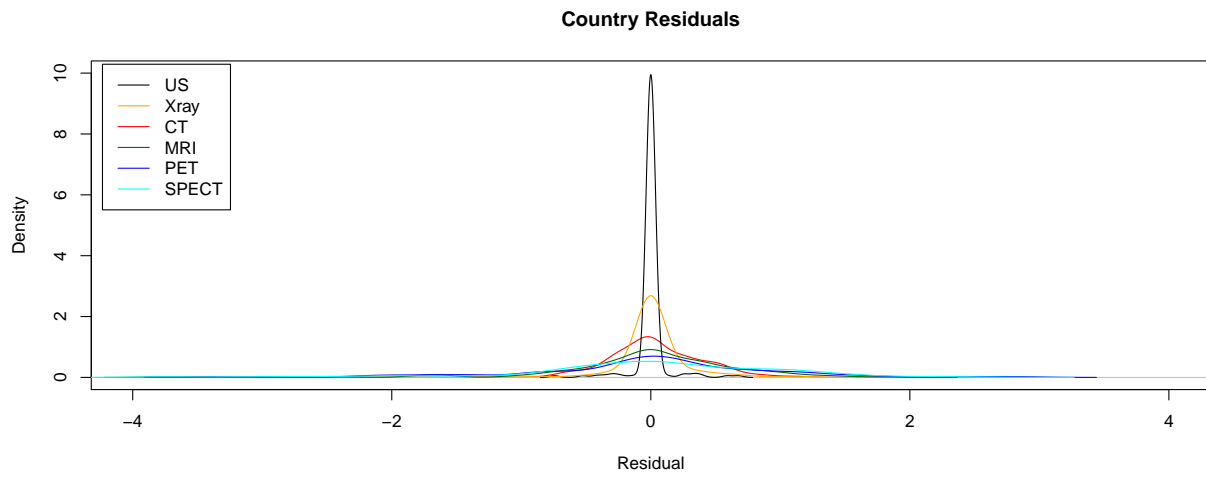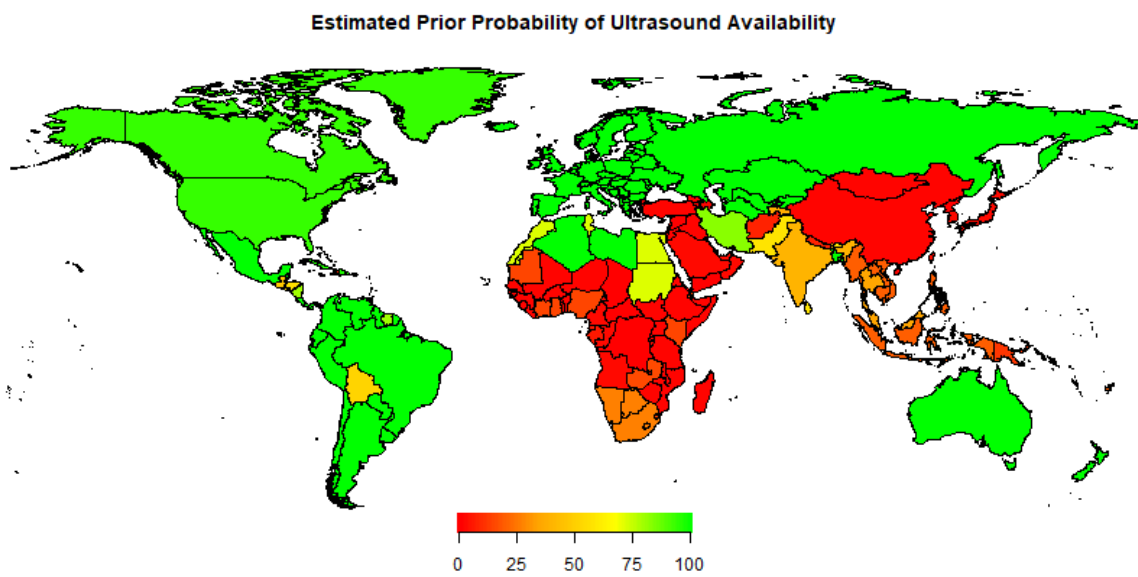

Estimated Prior Probability of Xray Availability

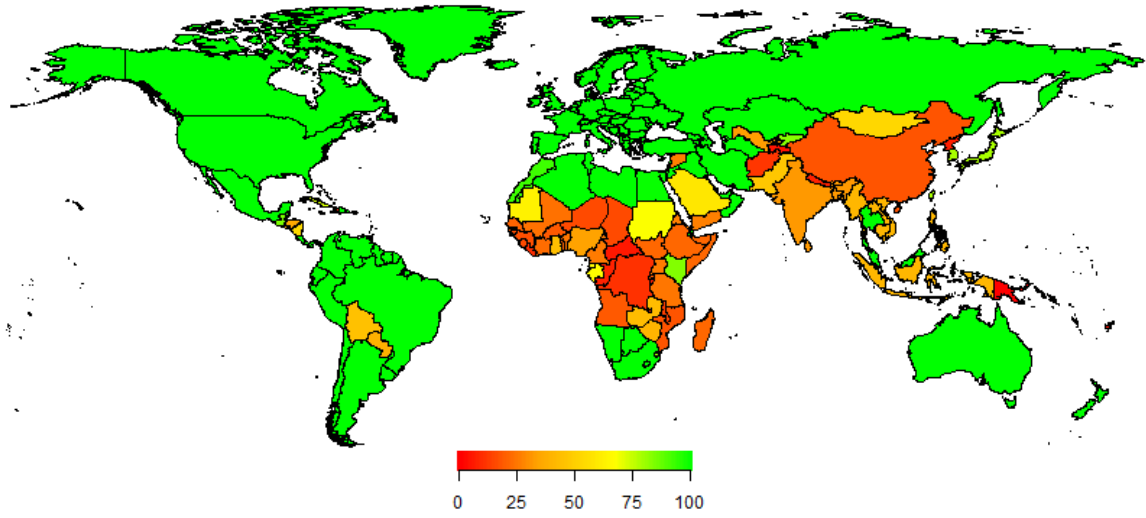

Estimated Prior Probability of CT Availability

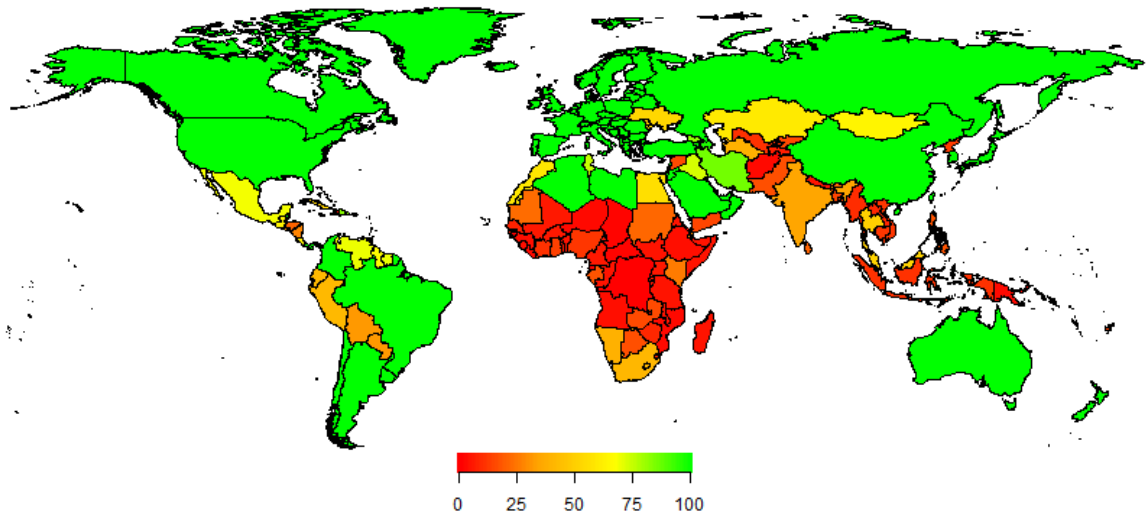

Estimated Prior Probability of MRI Availability

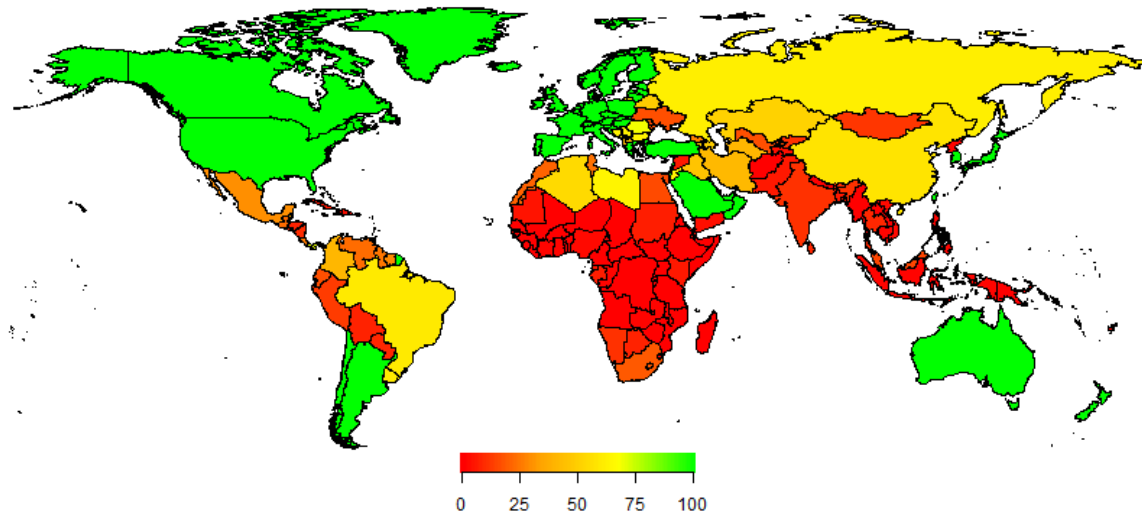

Estimated Prior Probability of PET Availability

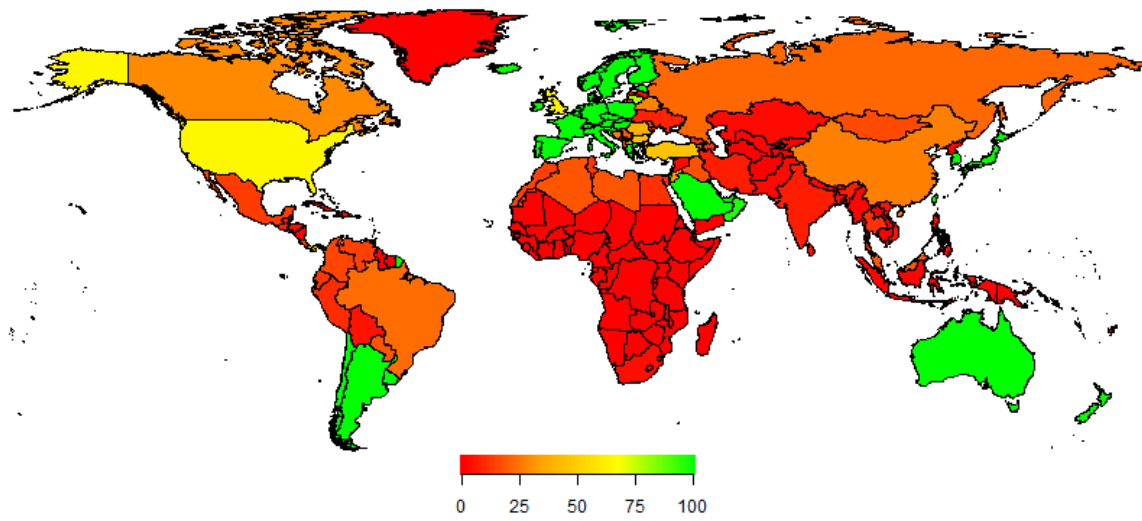

Estimated Prior Probability of SPECT Availability

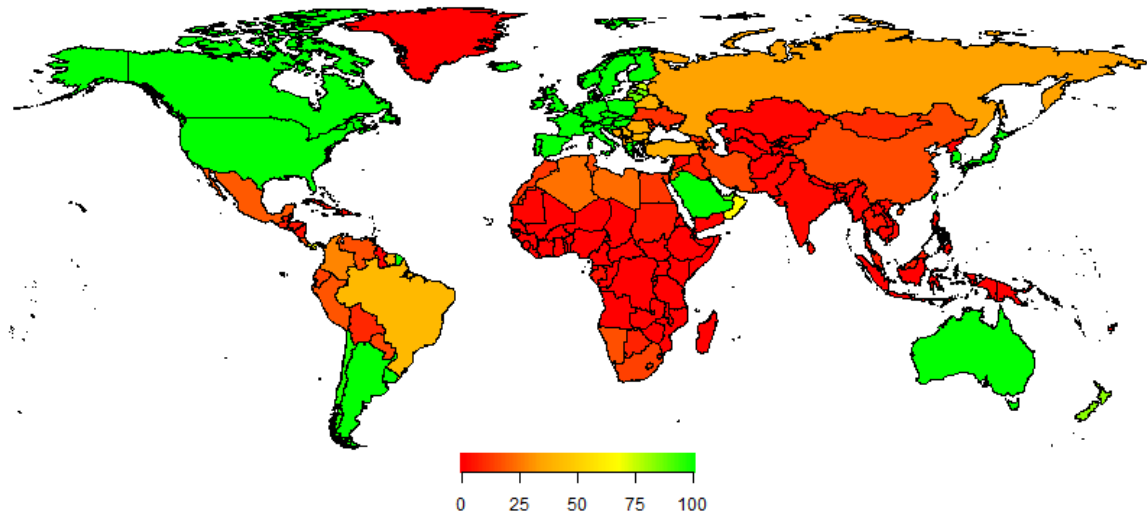

## 1.12 Quality

To account for other health-system and facility-level factors not explicitly modelled we included a parameter for ‘quality of care’. This parameter accounts for residual differences in survival not explained by cancer stage or treatment/imaging availability. We set wide priors with increasing probability of quality by income group (25%, 50%, 75%, 95%), and zero-mean priors for the other levels in the hierarchical model.

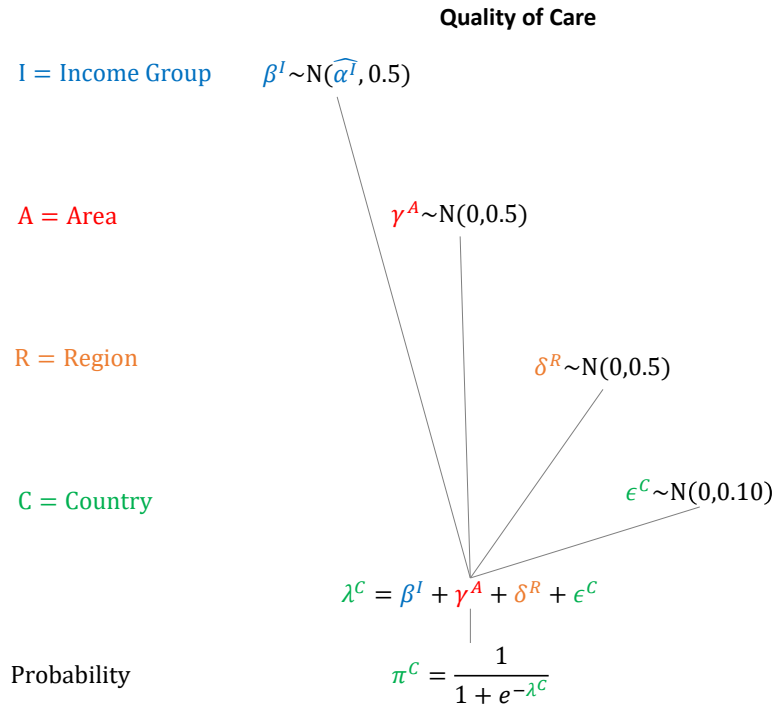

Here we plot the estimated prior distributions (in logit space).

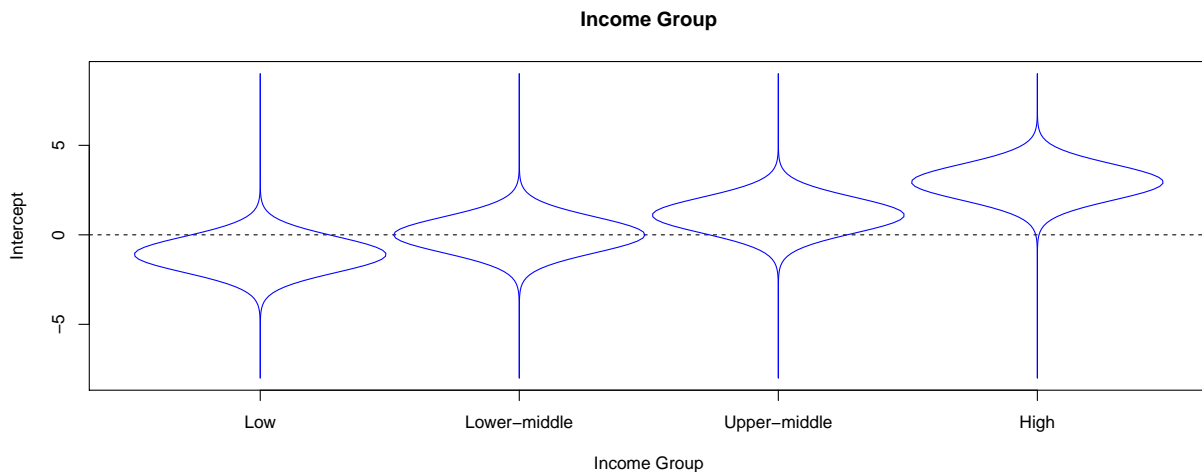



## 2 Model Calibration

To ensure our model results were consistent with reported survival data, we calibrated the model to survival estimates from CONCORD-3. We calibrated the model using a Bayesian approach in which the observed data (i.e. CONCORD survival estimates) are considered fixed, and the model parameters are random variables. To fit the parameters we used a simulated annealing search algorithm (a stochastic optimization approach) to identify good-fitting parameter sets. A goodness-of-fit score for each proposed parameter set was calculated as the sum of the squared distance between the predicted and reported 5-year survival estimates. We weighted each survival target inversely proportional to the width of its confidence interval to allow more precise estimates to have larger influence in the calibration.

### 2.1 Survival Targets

We obtained country-specific 5-year net survival estimates for the 11 cancers included in the model from CONCORD. The following diagnoses were available in both GLOBOCAN and CONCORD:

| Cancer        | GLOBOCAN    |                                                          |
|---------------|-------------|----------------------------------------------------------|
|               | Codes       | CONCORD Codes                                            |
| Oesophagus    | C15         | C15.0–C15.5, C15.8–C15.9                                 |
| Stomach       | C16         | C16.0–C16.6, C16.8–C16.9                                 |
| Colon         | C18         | C18.0–C18.9, C19.9 (Colon and rectosigmoid junction)     |
| Rectum + Anus | C19-20, C21 | C20.9, C21.0–C21.2, C21.8 (Rectum, anus, and anal canal) |
| Liver         | C22         | C22.0–C22.1 (Liver and intrahepatic bile ducts)          |
| Pancreas      | C25         | C25.0–C25.4, C25.7–C25.9                                 |
| Lung          | C33-34      | C34.0–C34.3, C34.8–C34.9 (Lung and bronchus)             |
| Breast        | C50         | C50.0–C50.6, C50.8–C50.9                                 |
| Cervix uteri  | C53         | C53.0–C53.1, C53.8–C53.9                                 |
| Prostate      | C61         | C61.9 (Prostate gland)                                   |

Note that the CONCORD survival estimates combine rectum and anus cancers into one group, while we simulate anus cancer separately in the model. We therefore pooled the anus and rectum cancer patients in the model when calculating the goodness-of-fit score for calibration. Anus-specific results are presented otherwise in the model however.

We removed targets with 0 CI width (i.e. 0 survival and reported CIs 0-0) to avoid dividing by 0 when calculating the goodness-of-fit score. We also removed 2 targets with implausibly high reported breast cancer survival, possibly due to selection bias:

- Morocco (Casablanca): 99.7 (95% CI 95.8-100), 2010-2014
- Nigeria (Ibadan): 97.5 (95% CI 89.9-100), 2010-2014

Our final set included 583 targets in total.

| Cancer        | # Countries |
|---------------|-------------|
| Oesophagus    | 57          |
| Stomach       | 59          |
| Colon         | 61          |
| Rectum + Anus | 60          |
| Liver         | 55          |
| Pancreas      | 55          |
| Lung          | 58          |
| Breast        | 59          |
| Cervix        | 60          |
| Prostate      | 59          |

We used CONCORD-3 estimates produced for 2010-14 where available ( $n=576$ ), and a few estimates produced for 2005-09 ( $n=7$ ) when more recent estimates were not available. The time period for each estimate is noted in the Appendix sections below (2.4 and 2.5).

To maximize the amount of data available for model calibration, we used all estimates available from CONCORD-3, including estimates that were flagged due to concerns around data quality. Survival estimates were flagged due to insufficient sample size to allow for age-standardisation, or because the estimates were derived from data with other quality issues (see Allemani 2018 for details on CONCORD data quality considerations). We present these estimates in the appendix as posterior predictive checks to evaluate the fit of our calibrated model, but care should be taken when interpreting these plots.

To evaluate the predictive accuracy of our model, we removed 50 targets at random as a validation test set. We therefore calibrated the model to 533 targets.

Reference: Allemani C, Matsuda T, Di Carlo V, et al. Global surveillance of trends in cancer survival 2000–14 (CONCORD-3): analysis of individual records 37 513 025 patients diagnosed with one of 18 cancers from 322 population-based registries in 71 countries. *Lancet* 2018; 391: 1023–75.

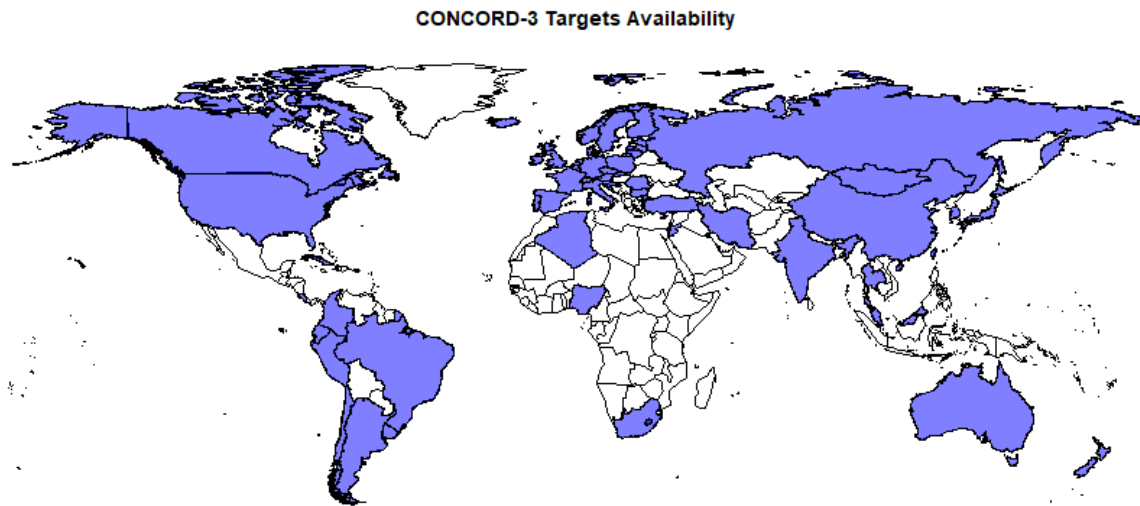

## 2.2 Scores

We ran 2,000 independent search chains of 1,000 iterations each, and selected the final 100 best-fitting parameter sets to account for uncertainty around the model parameters. Here we plot the distribution of calibration scores, with the best 100 shown in red. We also plot the goodness-of-fit scores by cancer (mean and 95% UI) among the best 100 sets.

Calibration Scores

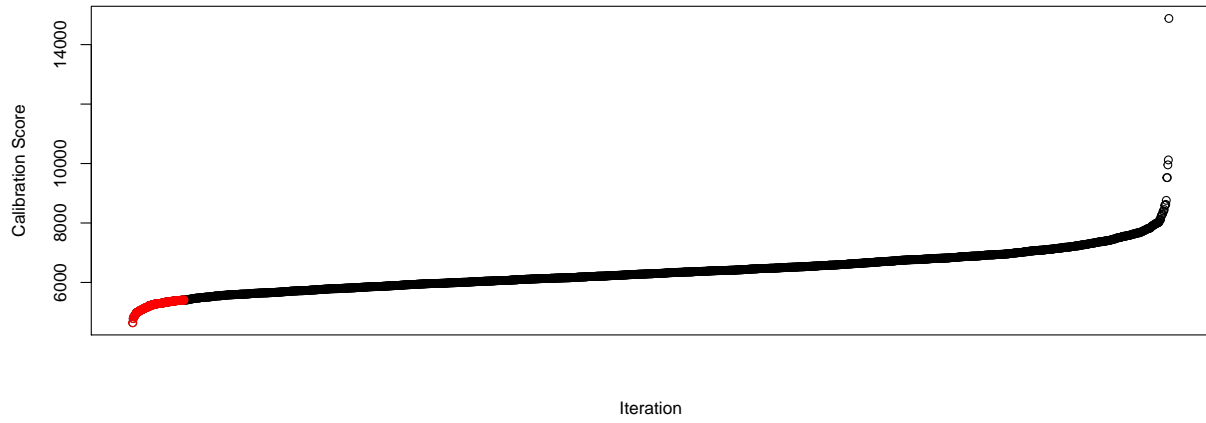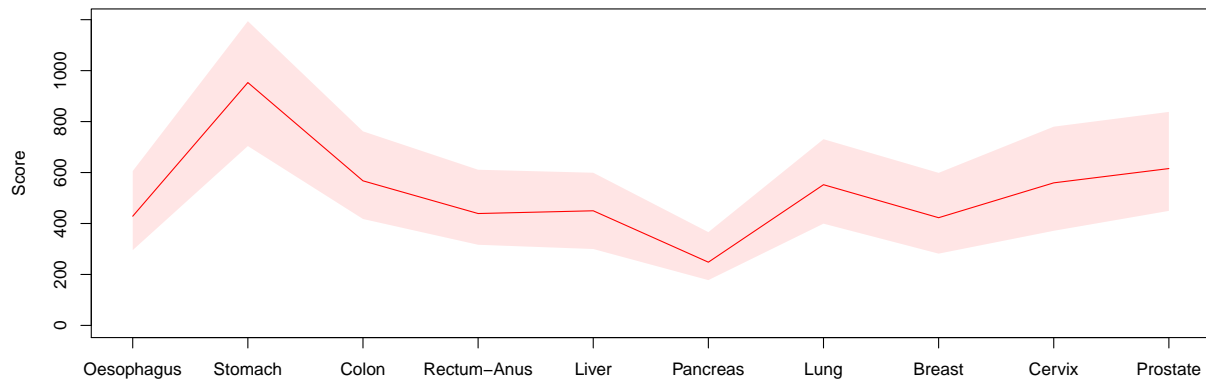

## 2.3 Summary Goodness-of-Fit Indicators

Here we report summary goodness-of-fit indicators by continent for our calibration targets and validation checks.

- **Overlap:** How often the model prediction intervals (95% UI) overlapped the CONCORD 95% CIs
- **Coverage:** How often the model prediction intervals contained the reported point estimate
- **Correlation:** Pearson’s  $r$  correlation coefficient of predicted means vs reported estimates
- $R^2$ : Generalized coefficient of determination (see definition below)
- **Mean Error:** Mean absolute error of predicted vs reported estimates

The generalized  $R^2$  was calculated as one minus the fraction of unexplained variance:  $R^2 = 1 - \frac{SS_{err}}{SS_{tot}}$ , where  $SS_{err}$  is the residual sum of squares:  $\sum_{i=1}^N (y_i - \hat{y}_i)^2$ , and  $SS_{tot}$  is the total sum of squares:  $\sum_{i=1}^N (y_i - \bar{y})^2$ .

### Calibration Targets

| Area                            | Overlap | Coverage | Correlation | $R^2$ | Mean Error |
|---------------------------------|---------|----------|-------------|-------|------------|
| Africa                          | 96.3%   | 63.0%    | 0.840       | 0.536 | 13.68      |
| Asia                            | 88.4%   | 71.3%    | 0.948       | 0.891 | 6.36       |
| Europe                          | 95.3%   | 87.5%    | 0.992       | 0.985 | 2.69       |
| Latin America and the Caribbean | 87.1%   | 75.3%    | 0.970       | 0.940 | 5.24       |
| North America                   | 100%    | 95.0%    | 0.998       | 0.996 | 1.55       |
| Oceania                         | 100%    | 94.1%    | 0.993       | 0.986 | 2.38       |

### Validation Checks

| Area                            | Overlap | Coverage | Correlation | $R^2$ | Mean Error |
|---------------------------------|---------|----------|-------------|-------|------------|
| Africa                          | 83.3%   | 66.7%    | 0.797       | 0.070 | 15.02      |
| Asia                            | 93.8%   | 75.0%    | 0.980       | 0.955 | 4.87       |
| Europe                          | 100%    | 90.5%    | 0.989       | 0.973 | 3.27       |
| Latin America and the Caribbean | 100%    | 100%     | 0.995       | 0.978 | 3.00       |
| Oceania                         | 100%    | 66.7%    | 0.999       | 0.930 | 6.52       |

Note: No North America targets were sampled as part of the test set.

## 2.4 Calibration Target Comparisons

Here we plot our modeled survival estimates (mean and 95% UI of the posterior predicted estimates) compared to the CONCORD estimates used to calibrate the model (i.e. training set).

Black lines indicate CONCORD estimates and 95% CI. Blue lines and shaded regions indicate modeled means and 95% UI.

### 2.4.1 Oesophagus

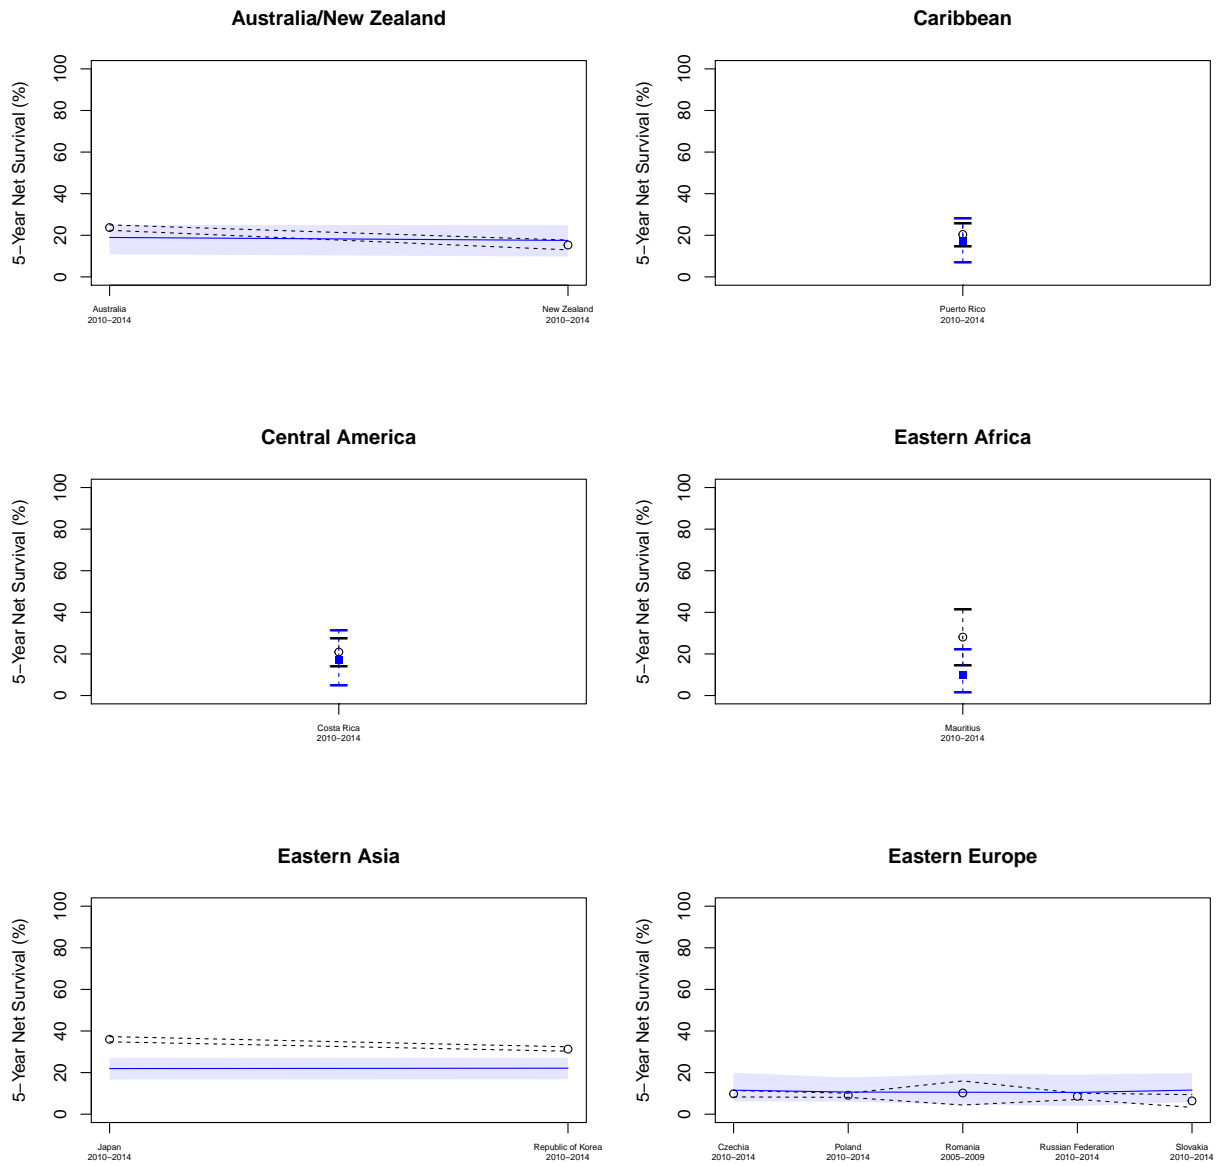

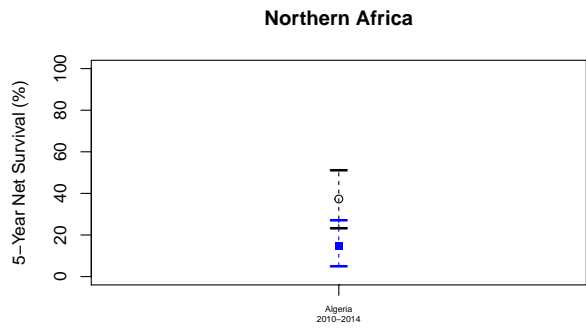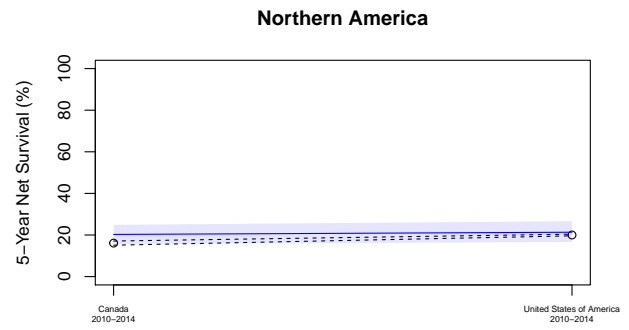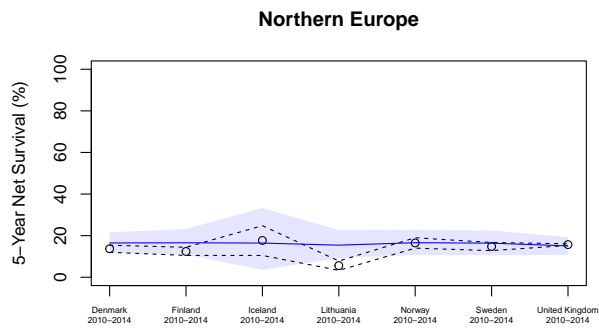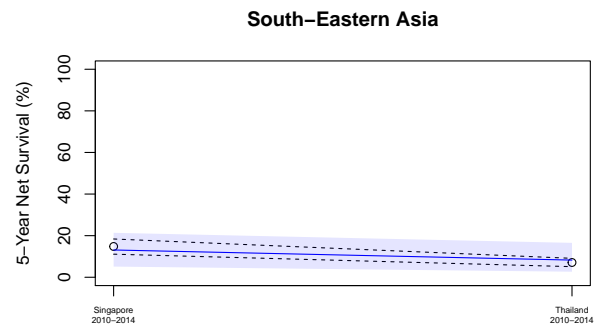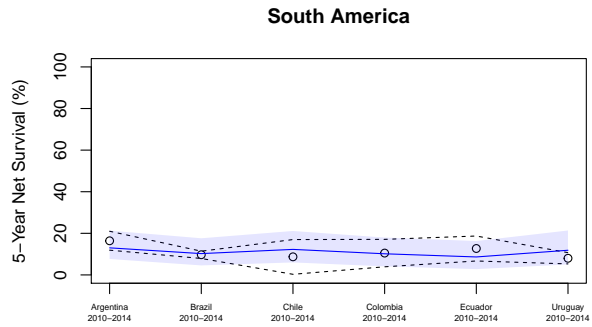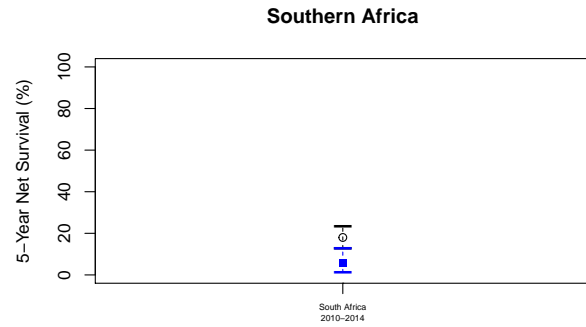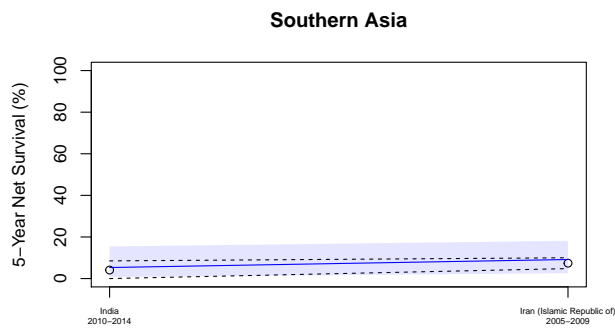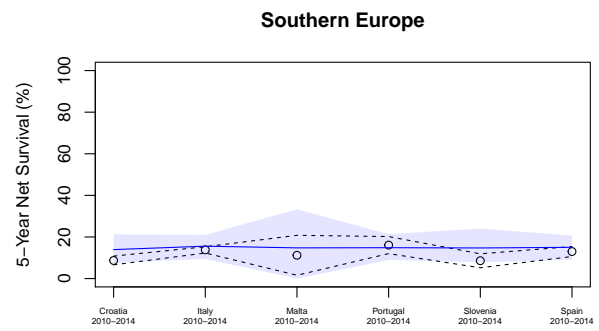

**Western Asia**

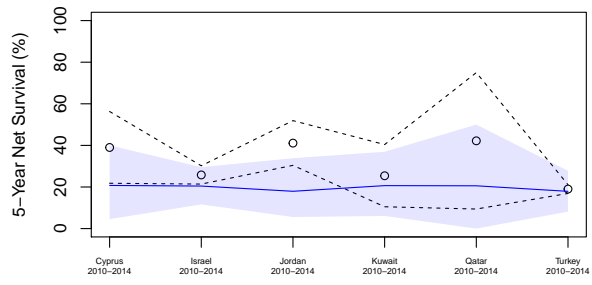

**Western Europe**

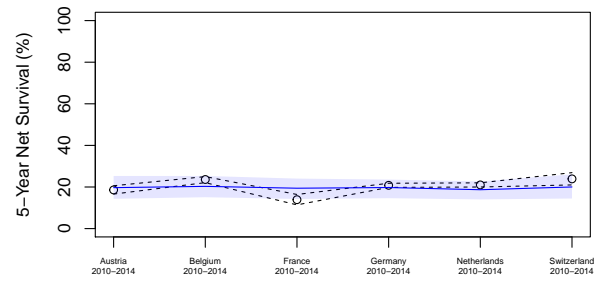

## 2.4.2 Stomach

**Australia/New Zealand**

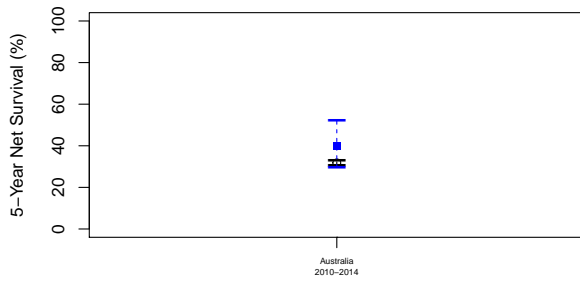

**Caribbean**

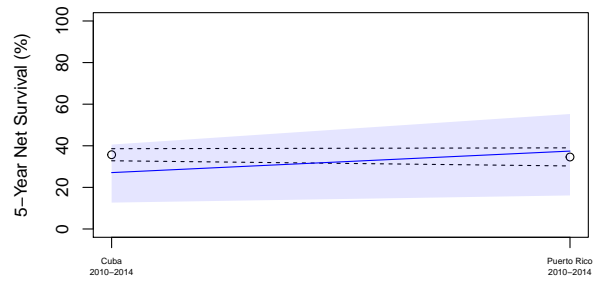

**Central America**

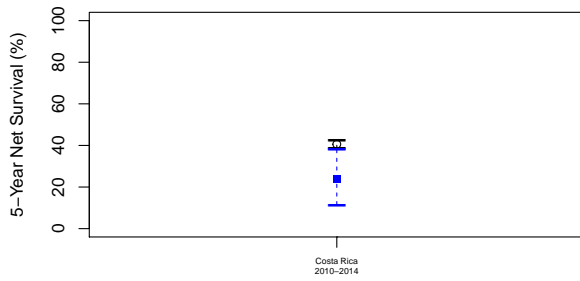

**Eastern Africa**

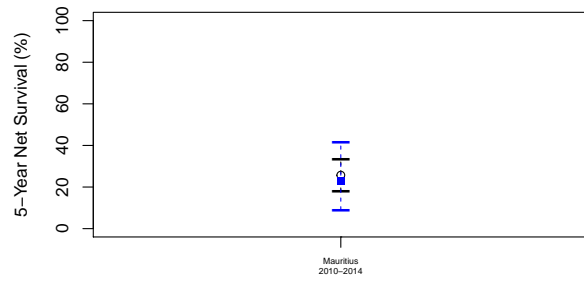

**Eastern Asia**

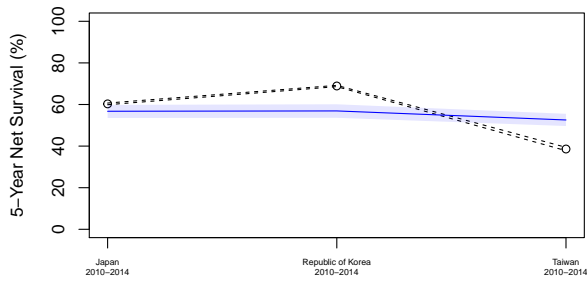

**Eastern Europe**

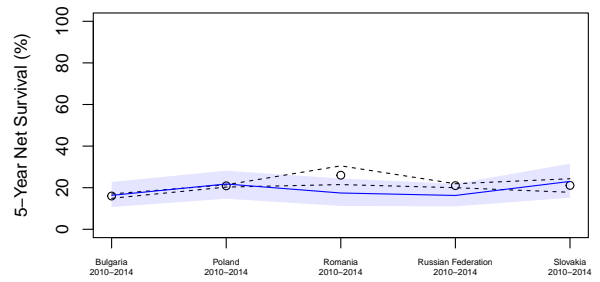

**Northern Africa**

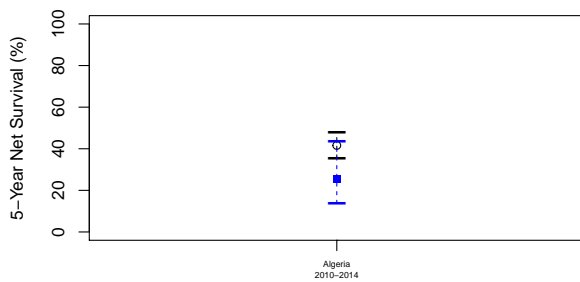

**Northern America**

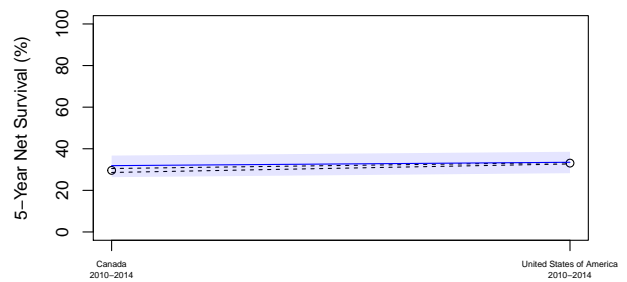



**Northern Europe**

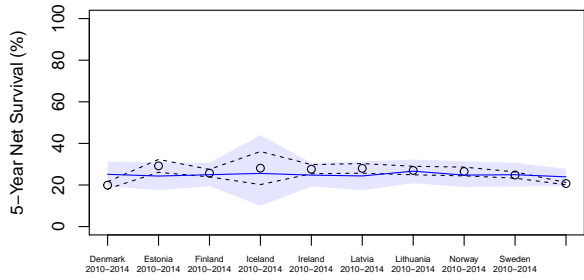

**South-Eastern Asia**

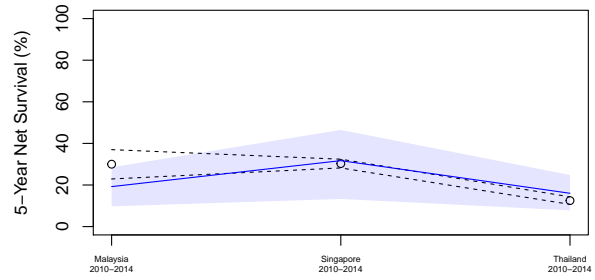

**South America**

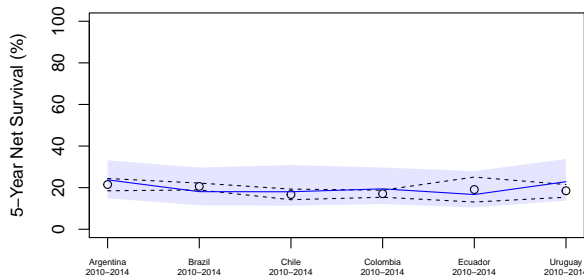

**Southern Africa**

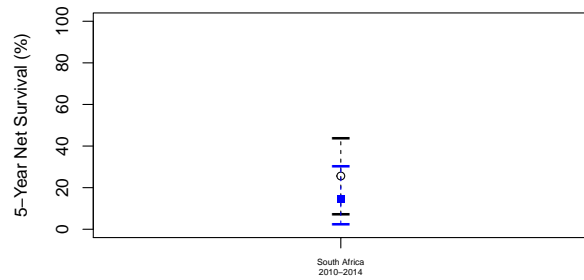

**Southern Asia**

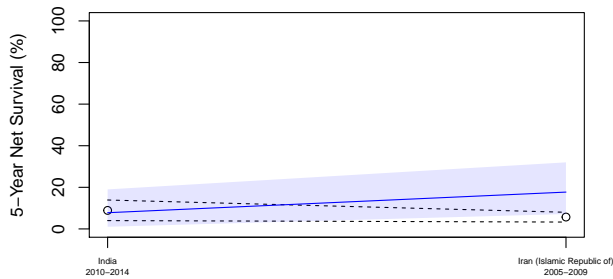

**Southern Europe**

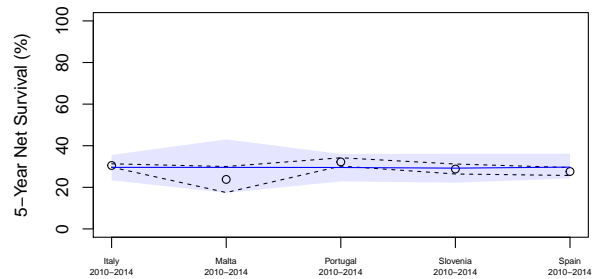

**Western Asia**

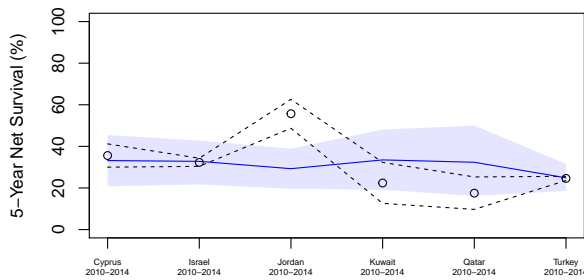

**Western Europe**

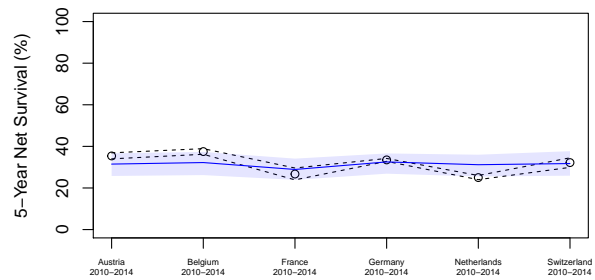

### 2.4.3 Colon

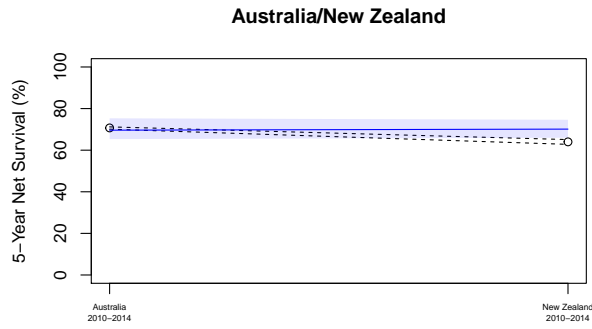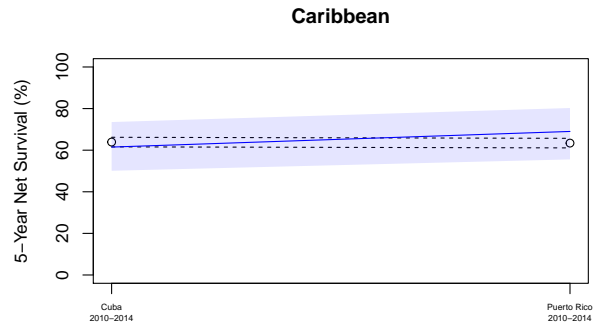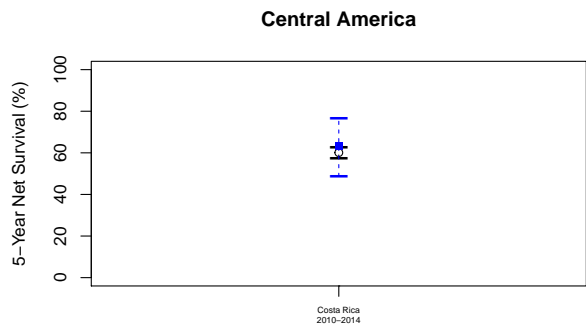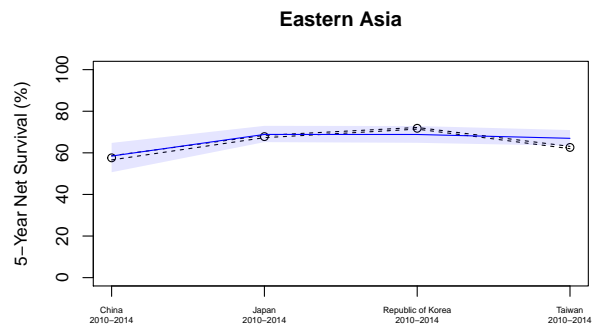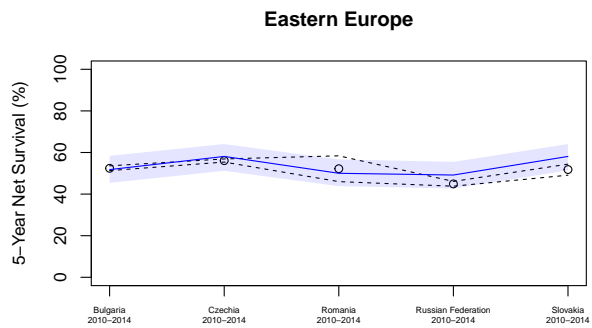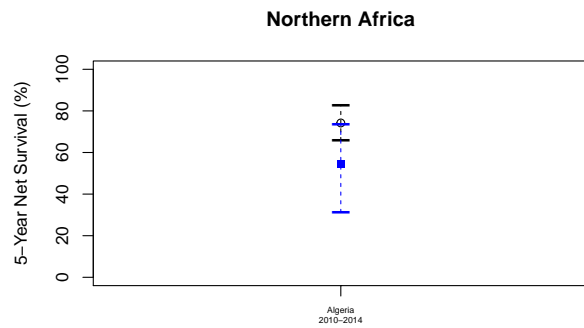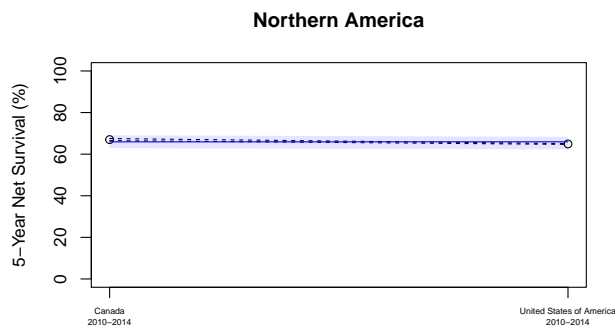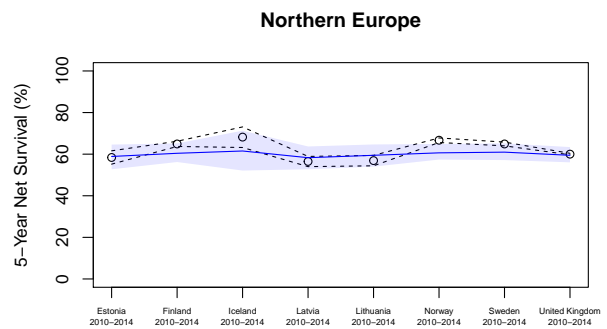

**South-Eastern Asia**

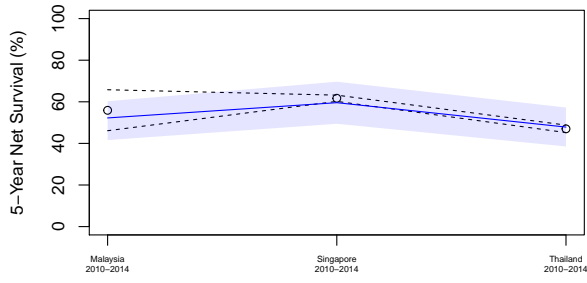

**South America**

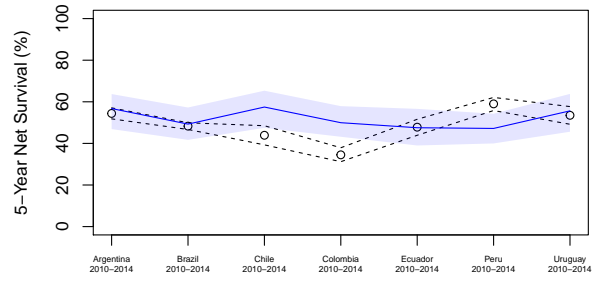

**Southern Africa**

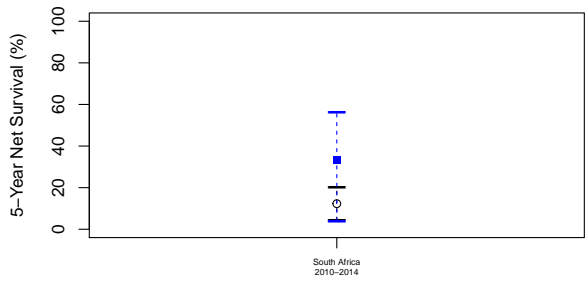

**Southern Asia**

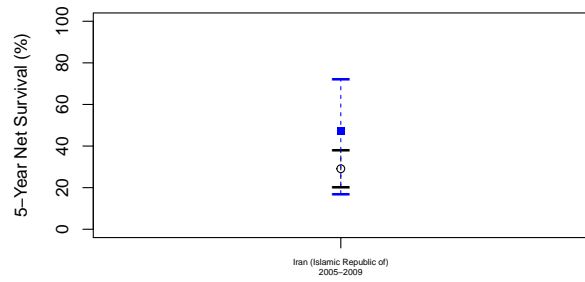

**Southern Europe**

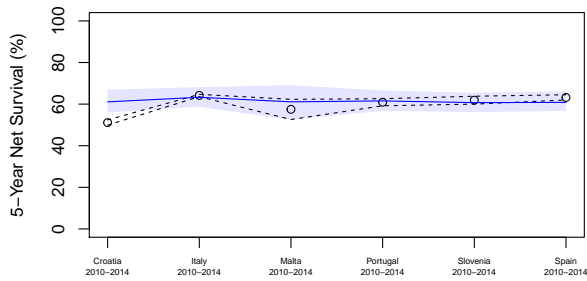

**Western Africa**

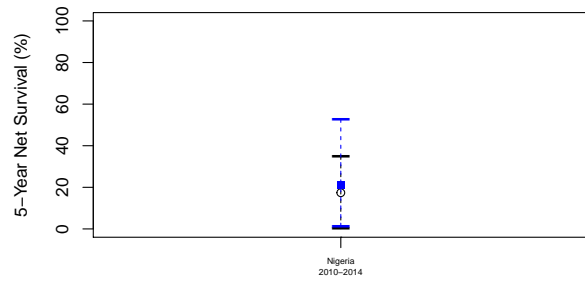

**Western Asia**

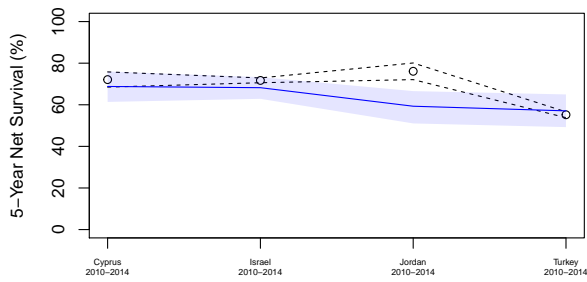

**Western Europe**

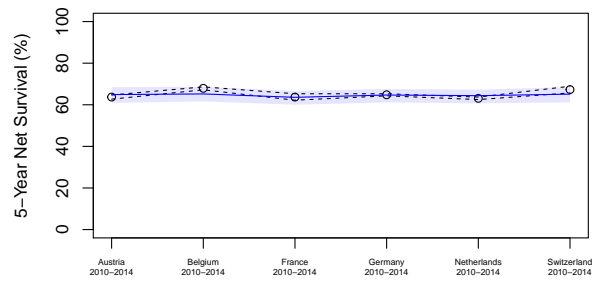

## 2.4.4 Rectum-Anus

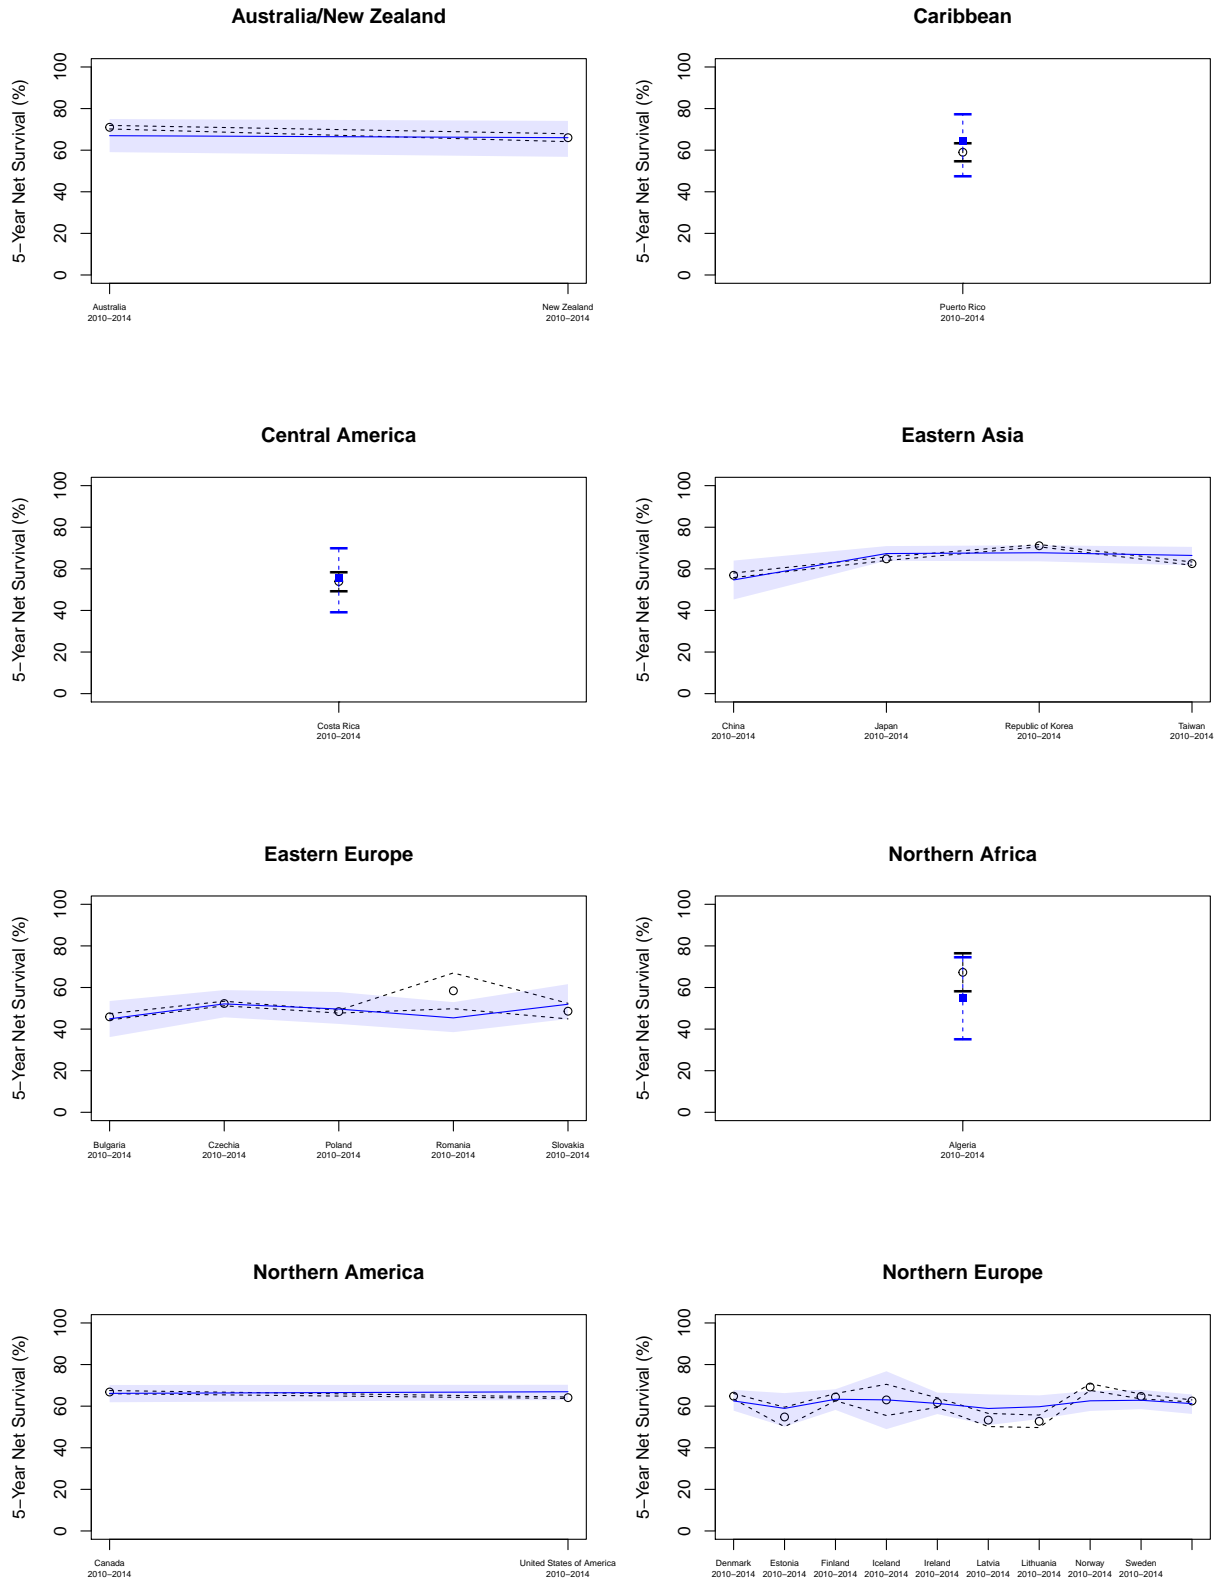

**South-Eastern Asia**

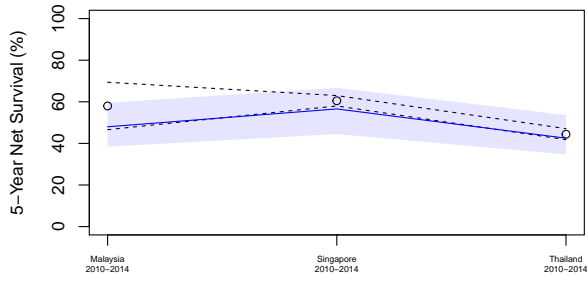

**South America**

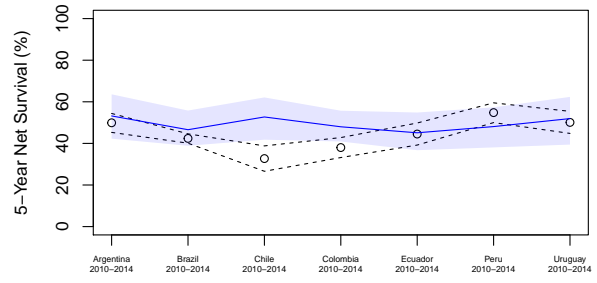

**Southern Africa**

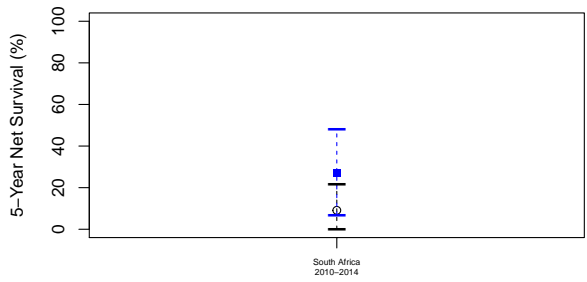

**Southern Asia**

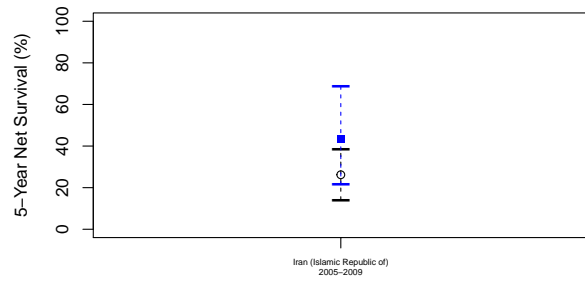

**Southern Europe**

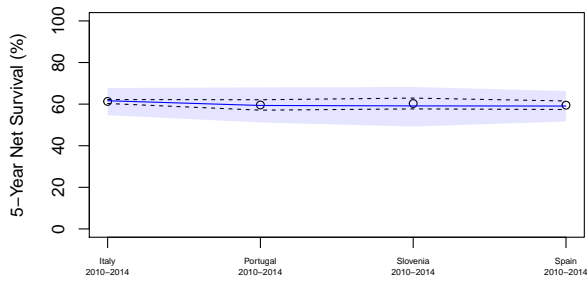

**Western Africa**

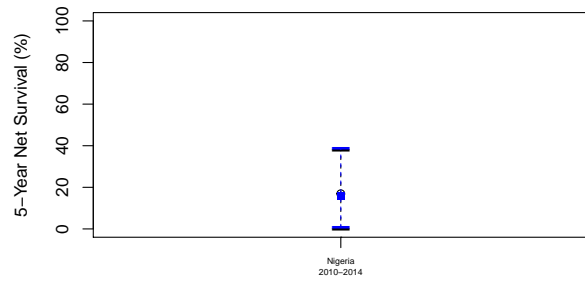

**Western Asia**

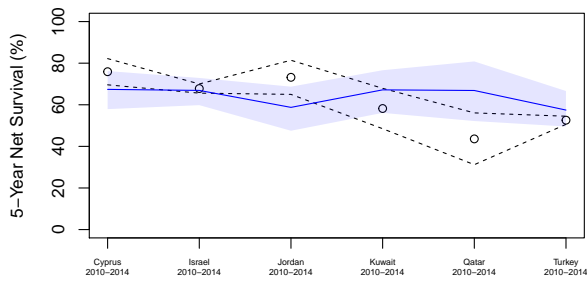

**Western Europe**

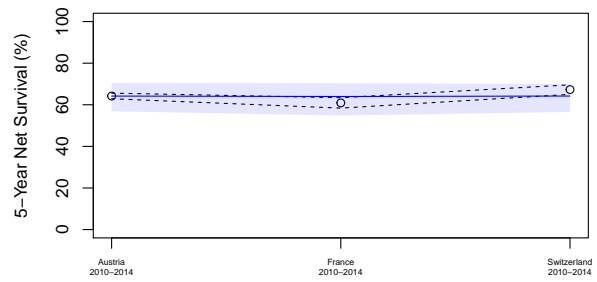

## 2.4.5 Liver

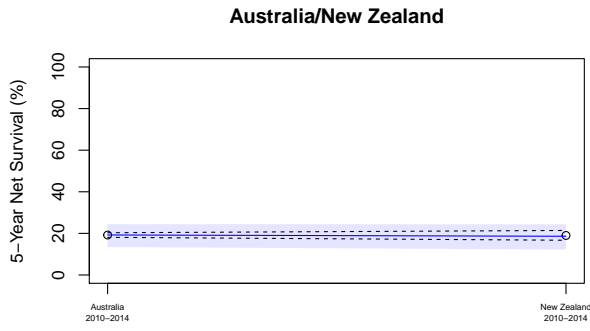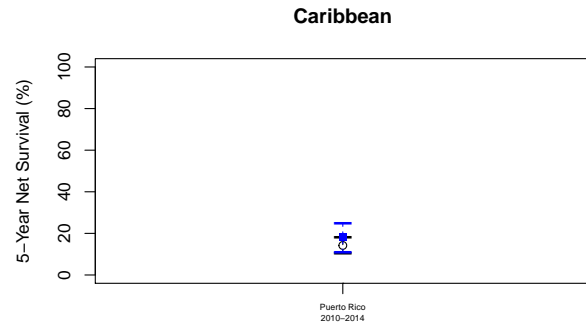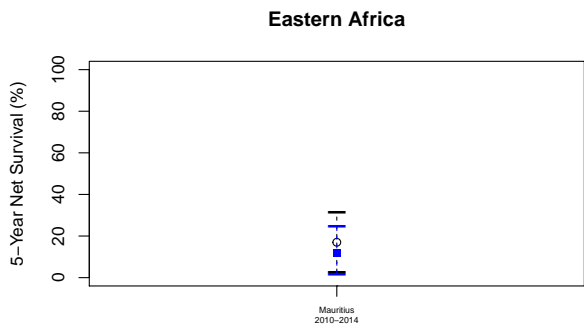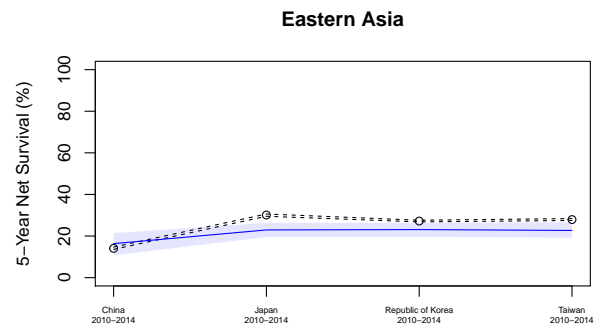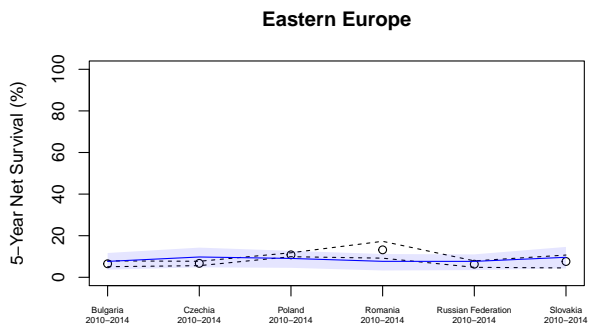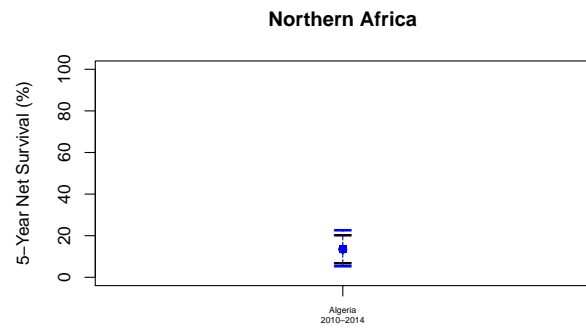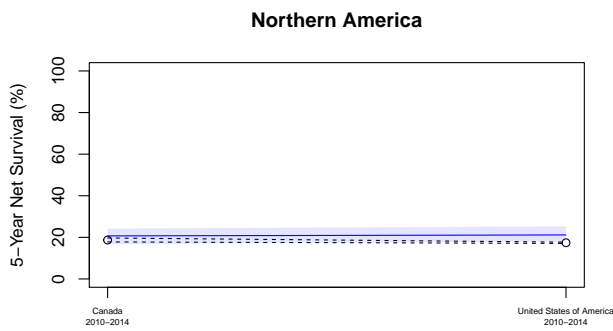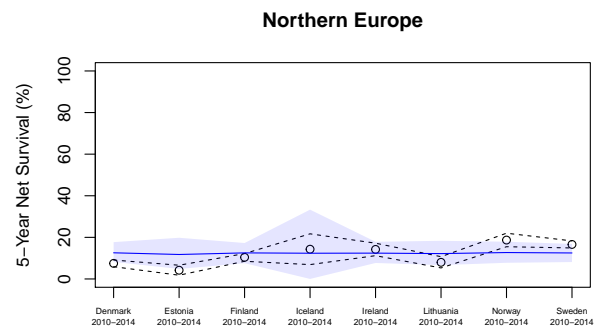

**South-Eastern Asia**

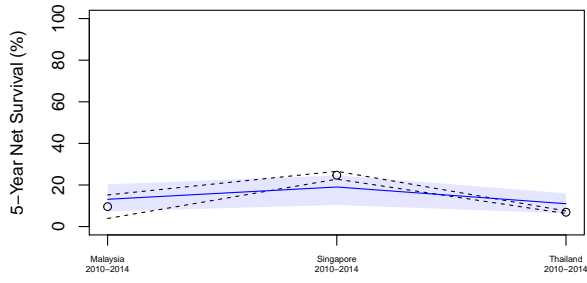

**South America**

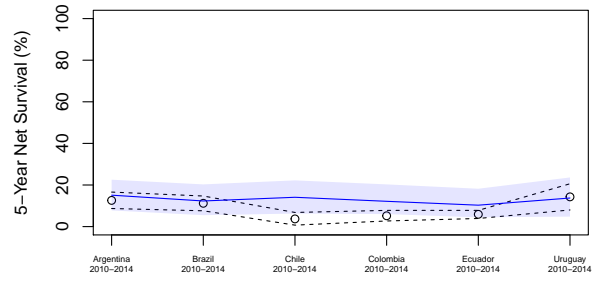

**Southern Asia**

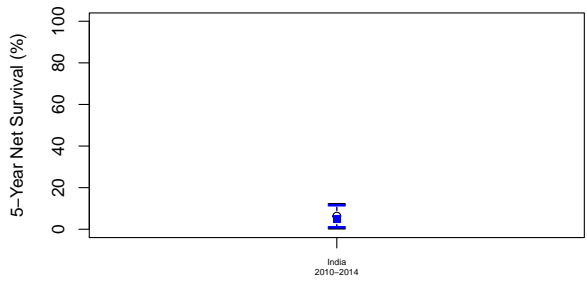

**Southern Europe**

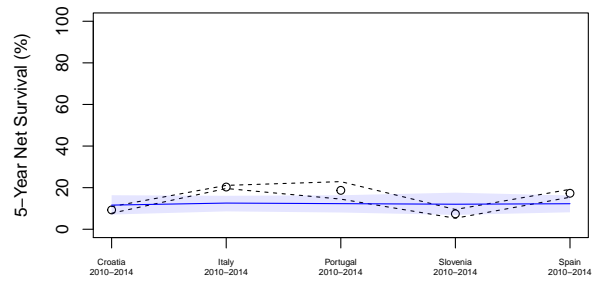

**Western Asia**

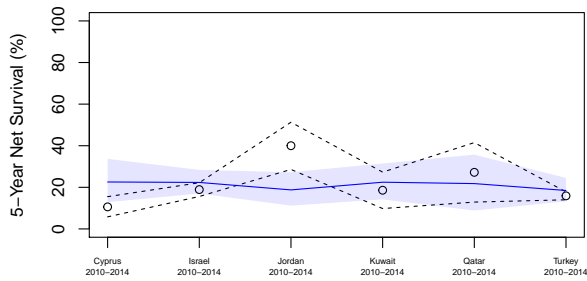

**Western Europe**

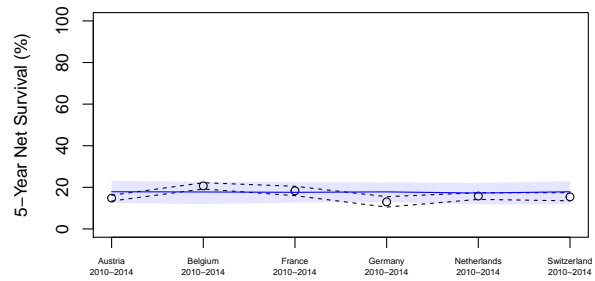

## 2.4.6 Pancreas

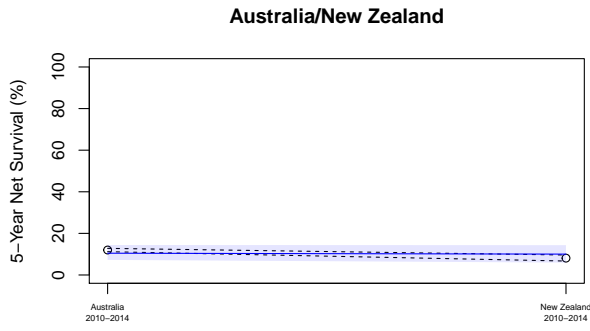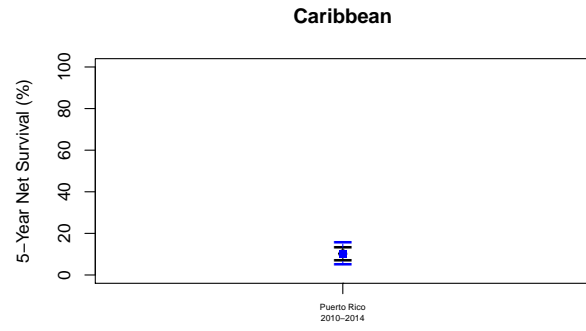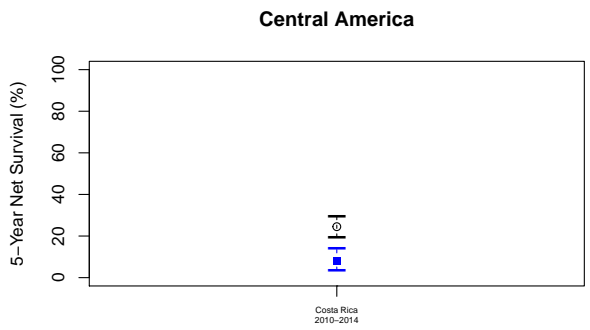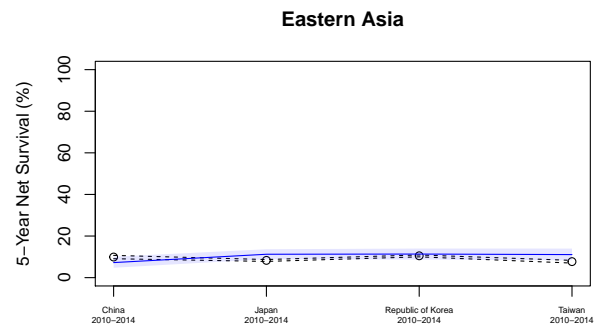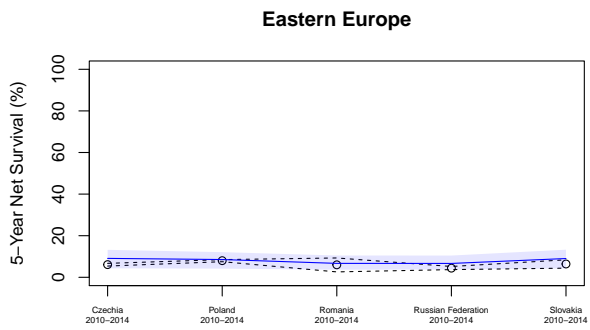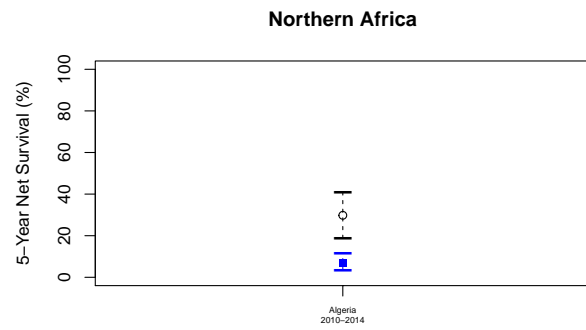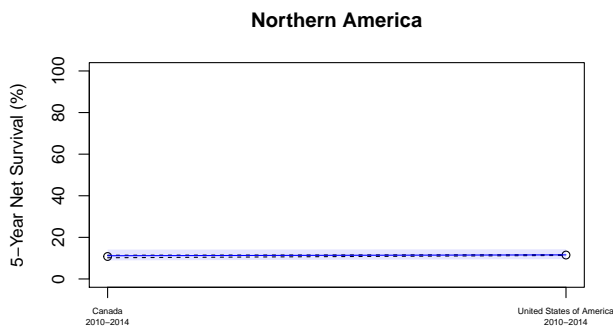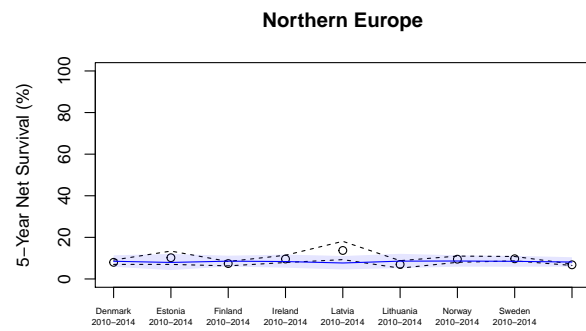



**South-Eastern Asia**

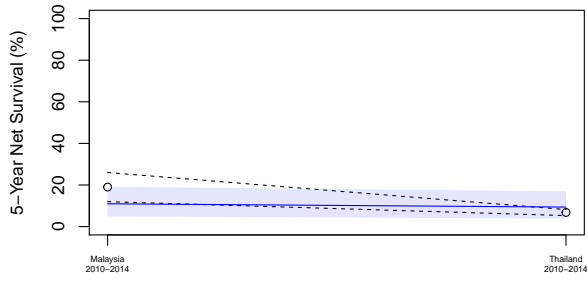

**South America**

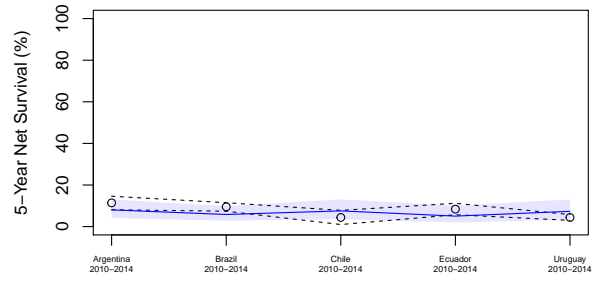

**Southern Africa**

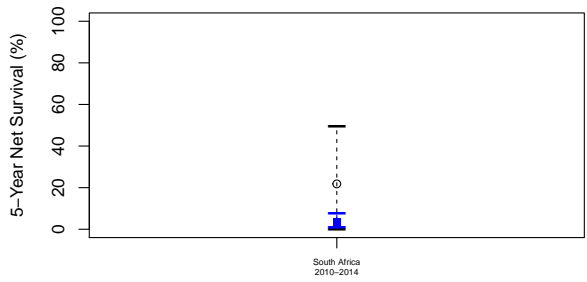

**Southern Asia**

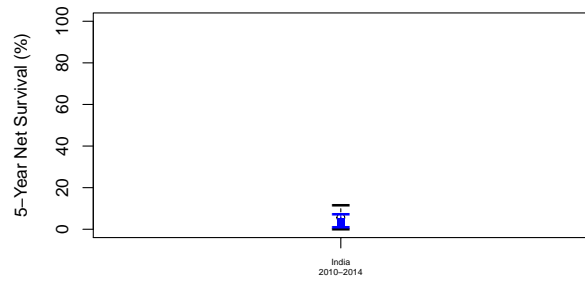

**Southern Europe**

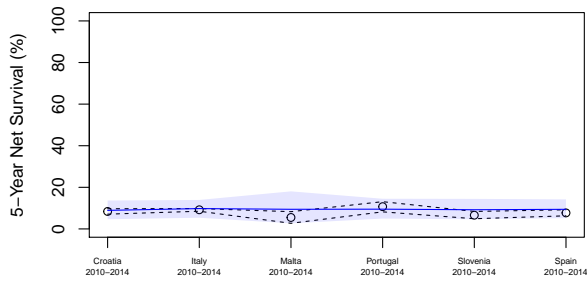

**Western Asia**

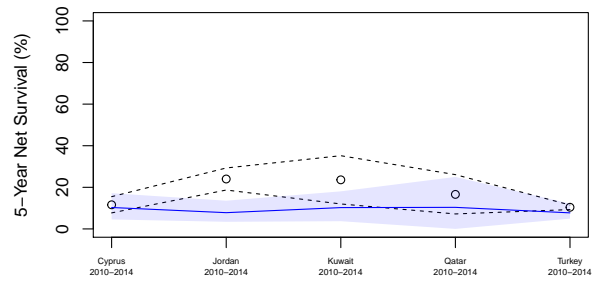

**Western Europe**

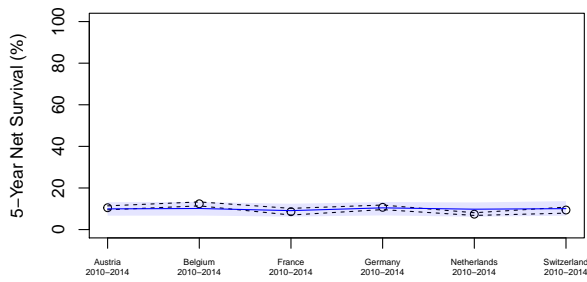

## 2.4.7 Lung

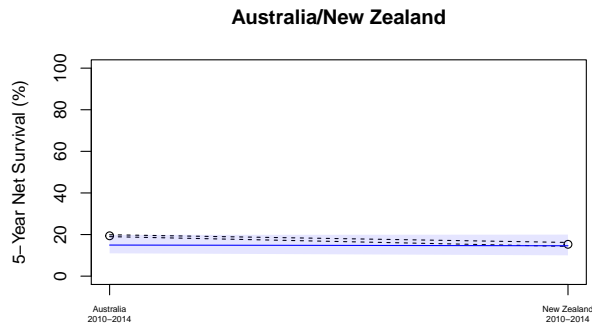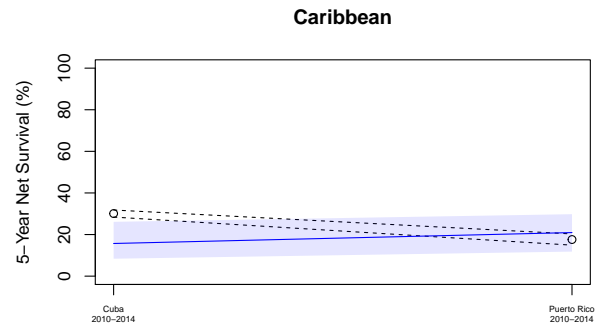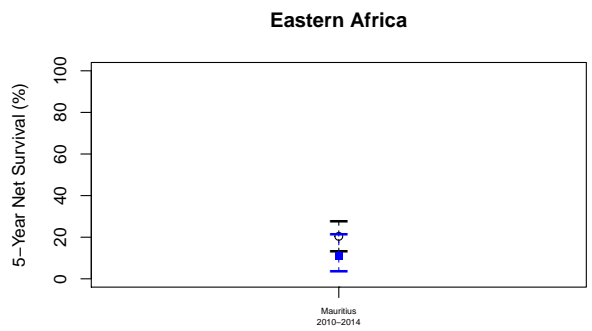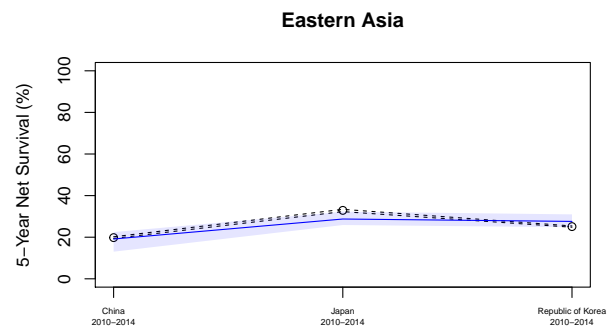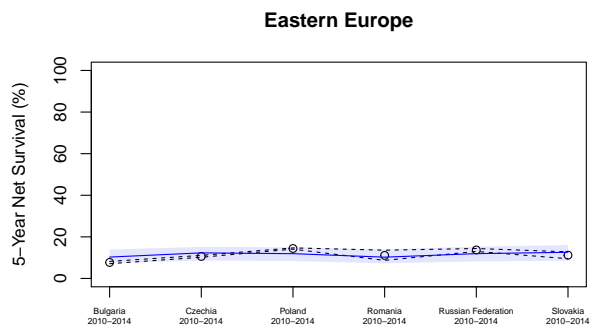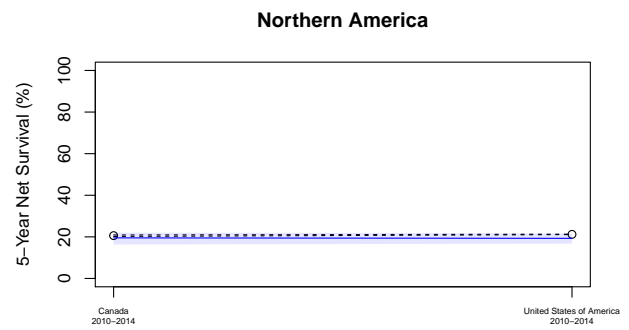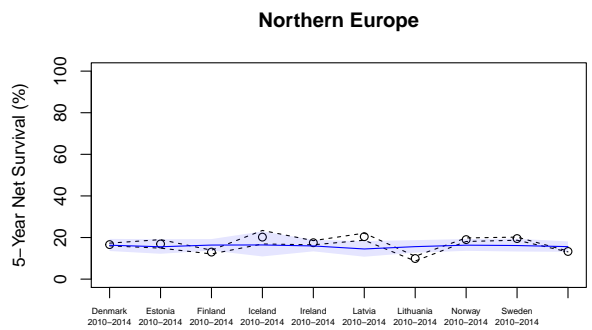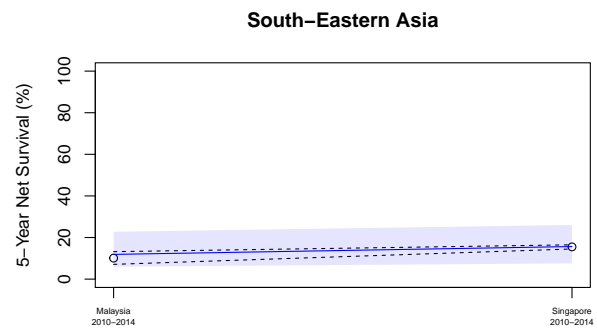

**South America**

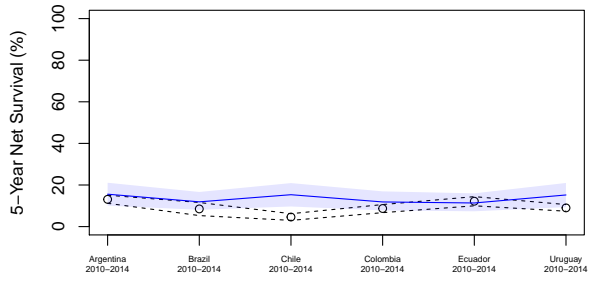

**Southern Africa**

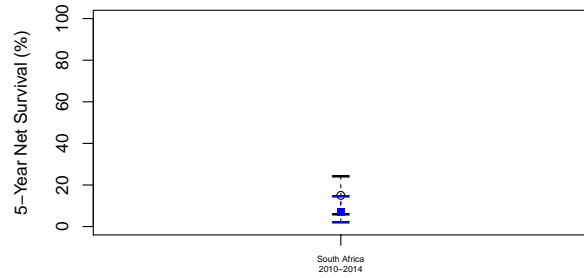

**Southern Asia**

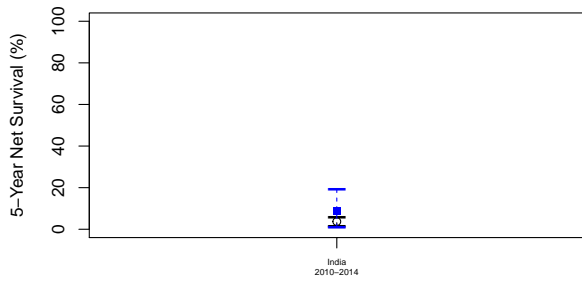

**Southern Europe**

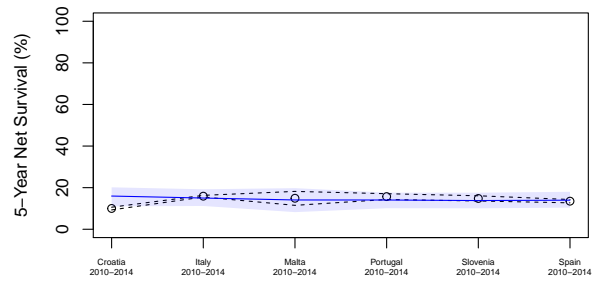

**Western Asia**

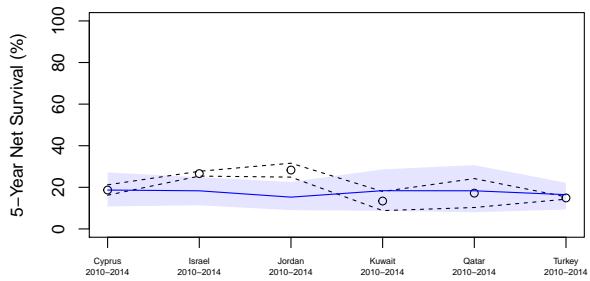

**Western Europe**

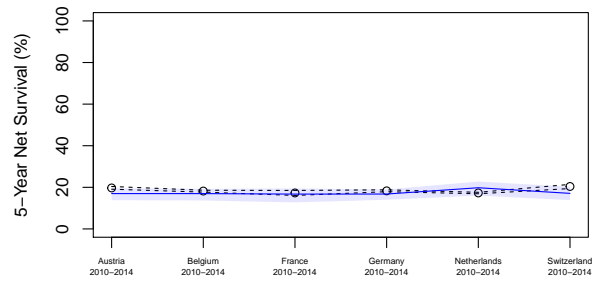

## 2.4.8 Breast

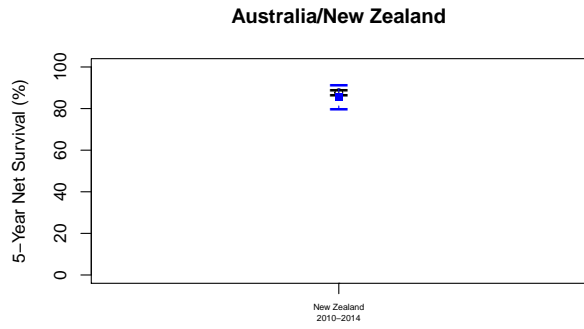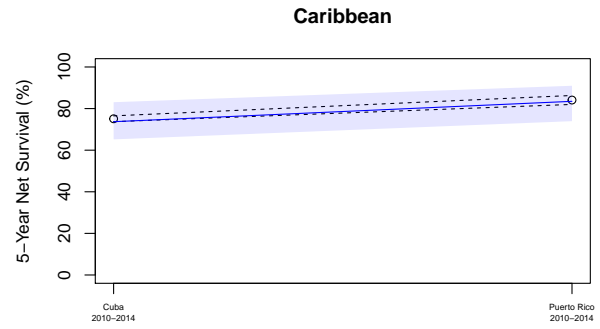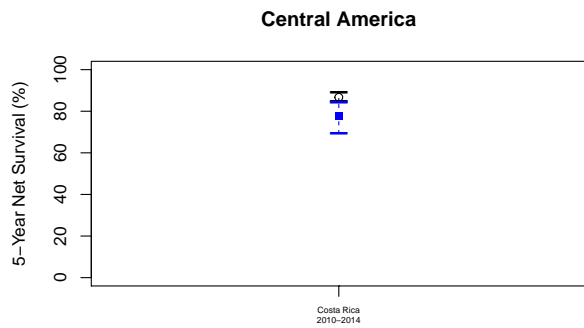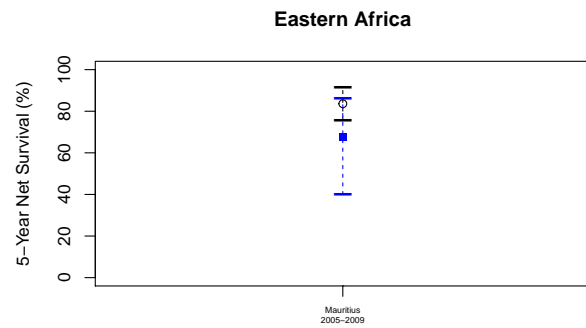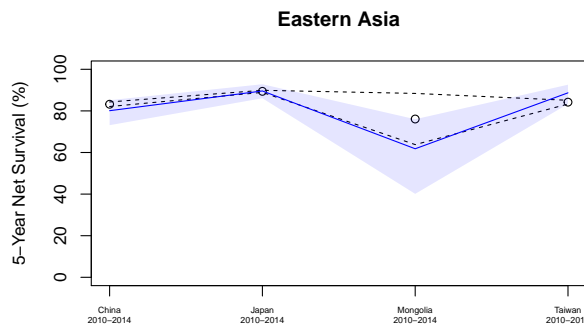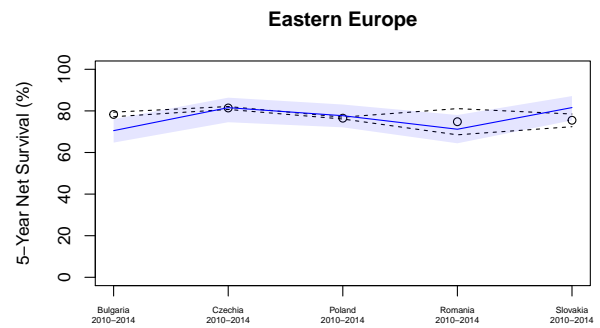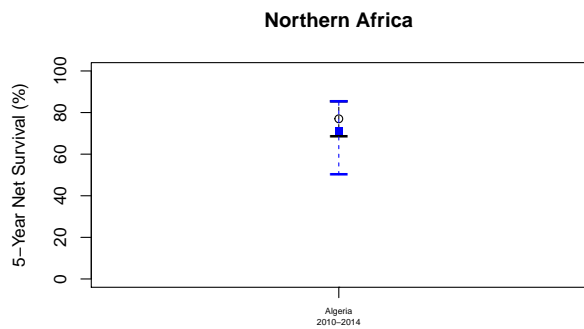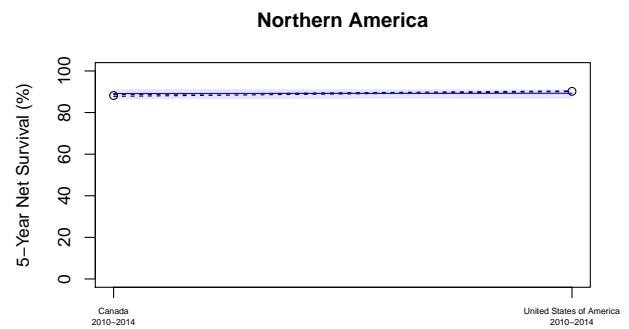

**Northern Europe**

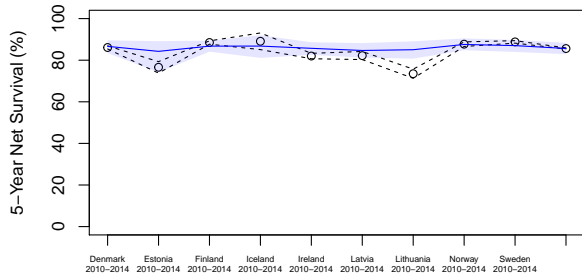

**South-Eastern Asia**

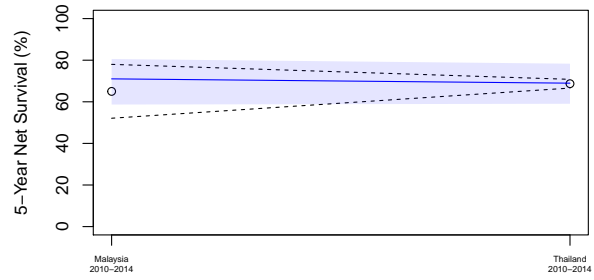

**South America**

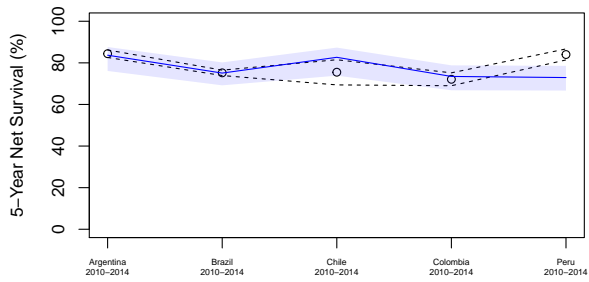

**Southern Africa**

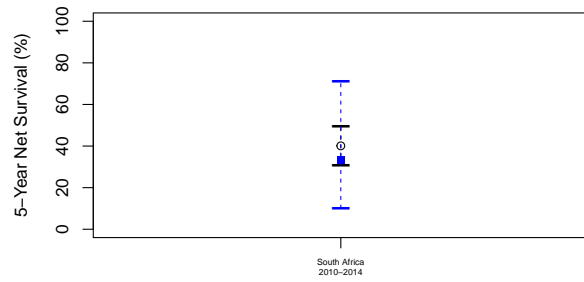

**Southern Asia**

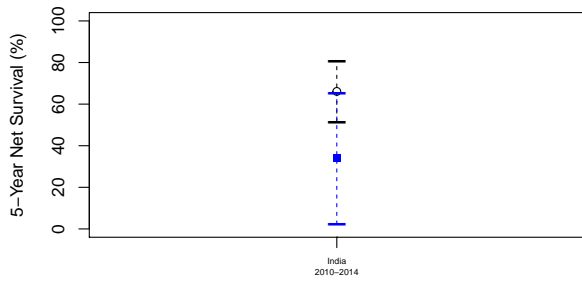

**Southern Europe**

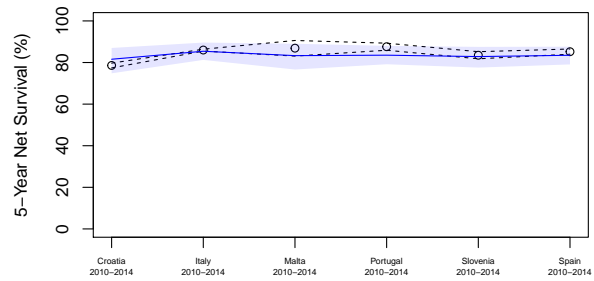

**Western Asia**

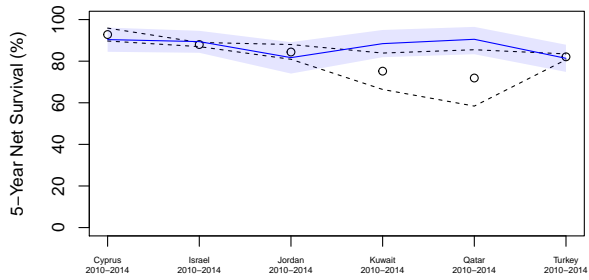

**Western Europe**

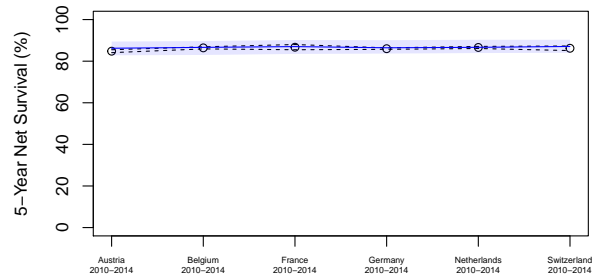

## 2.4.9 Cervix

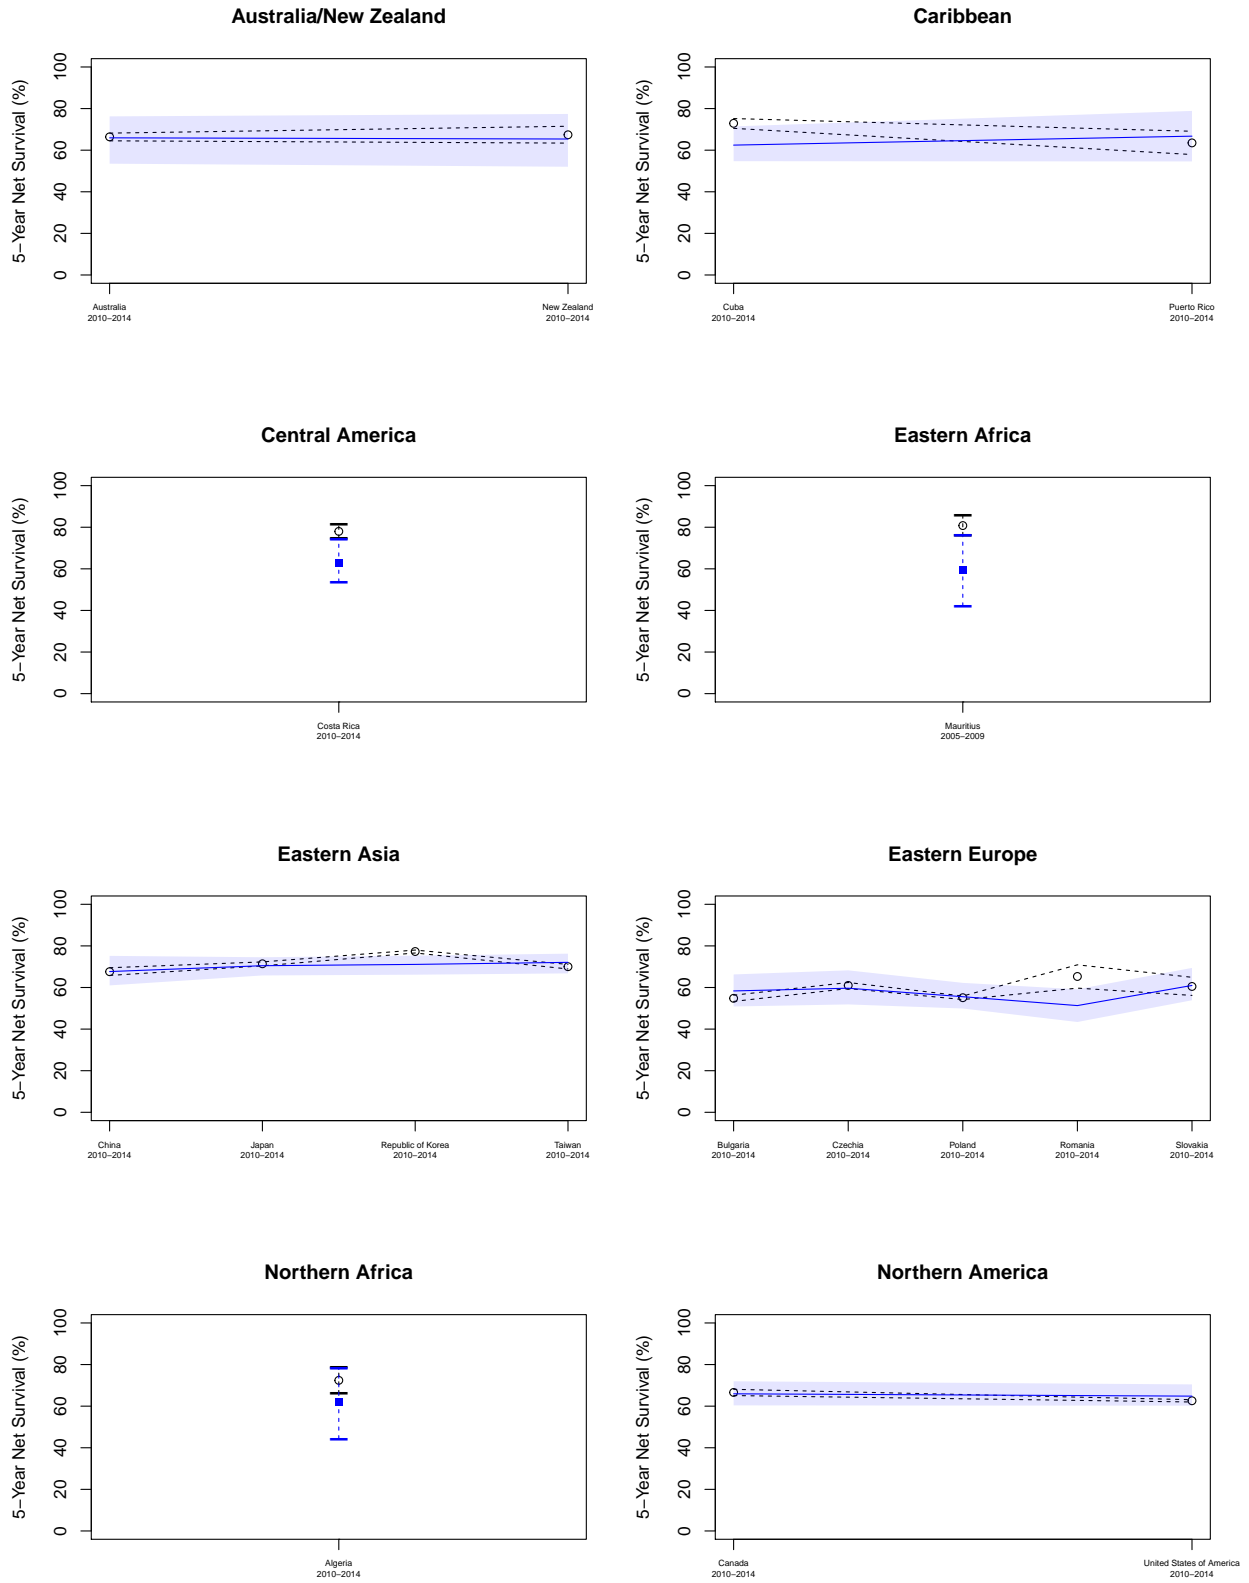

**Northern Europe**

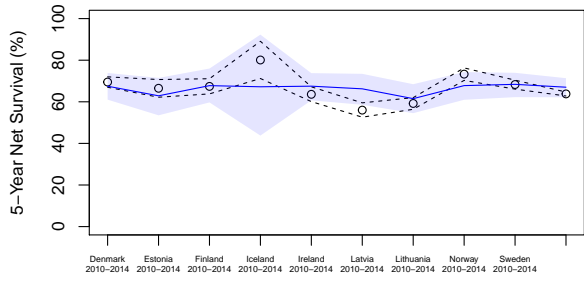

**South-Eastern Asia**

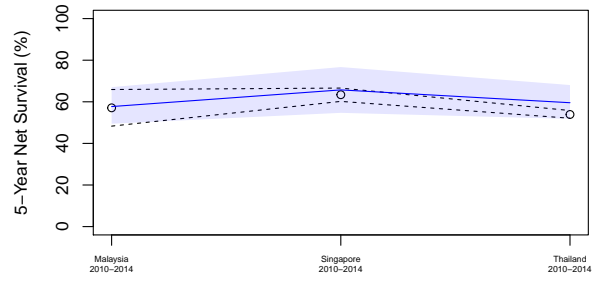

**South America**

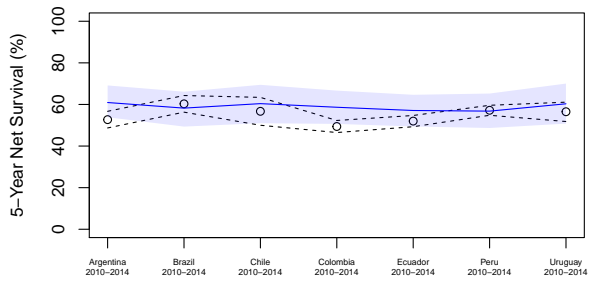

**Southern Africa**

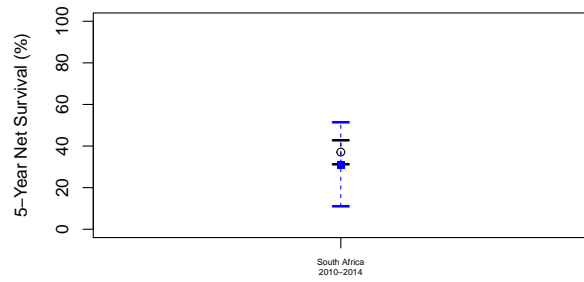

**Southern Asia**

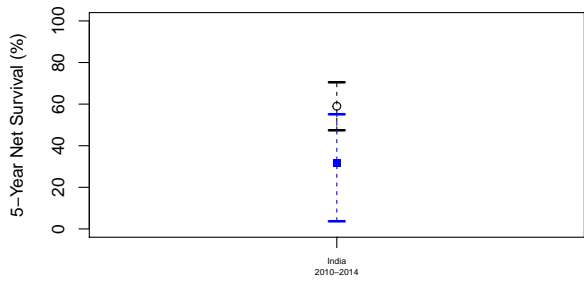

**Southern Europe**

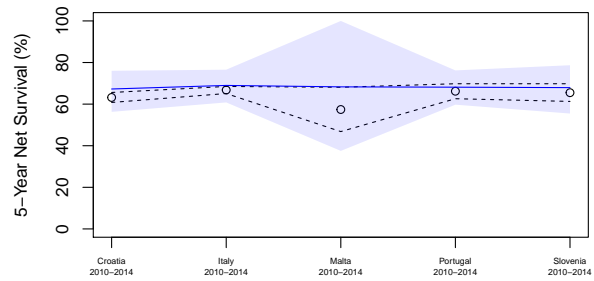

**Western Africa**

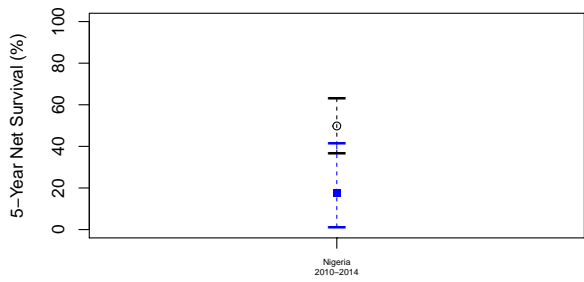

**Western Asia**

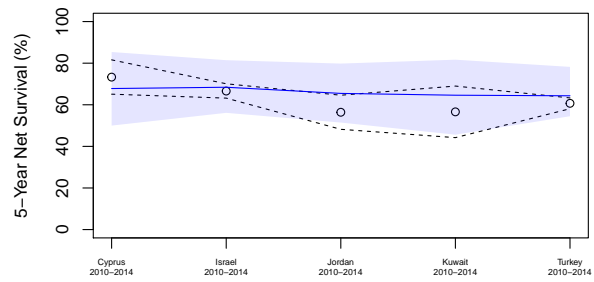

### Western Europe

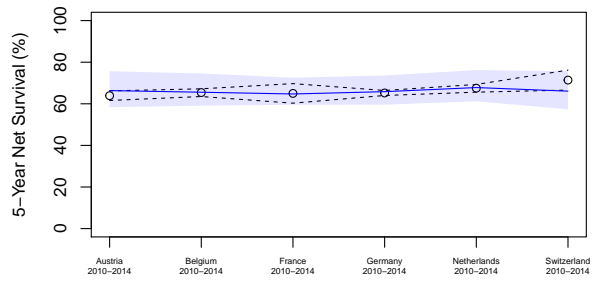



## 2.4.10 Prostate

**Australia/New Zealand**

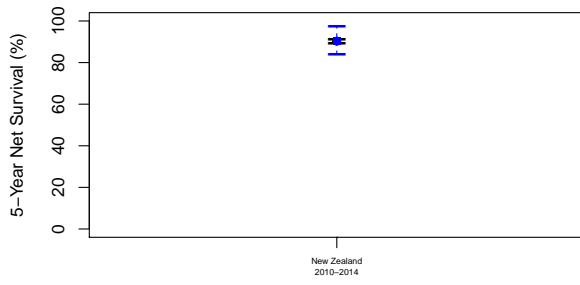

**Caribbean**

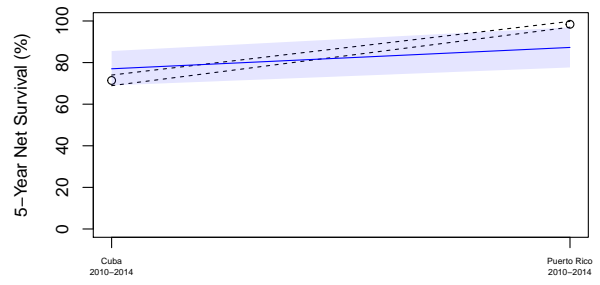

**Central America**

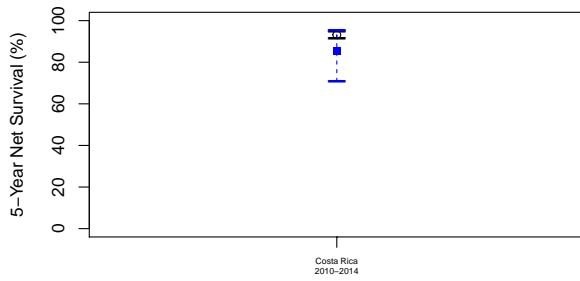

**Eastern Asia**

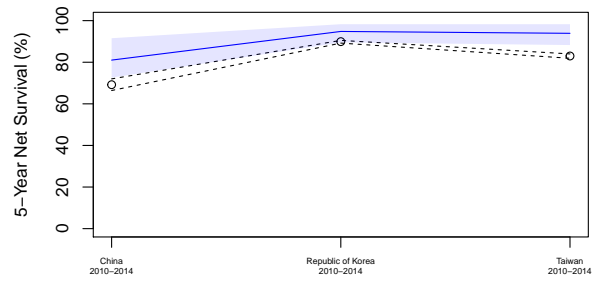

**Eastern Europe**

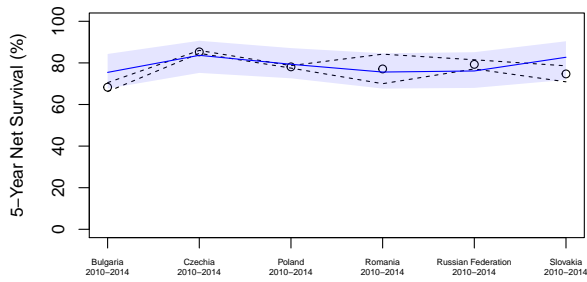

**Northern Africa**

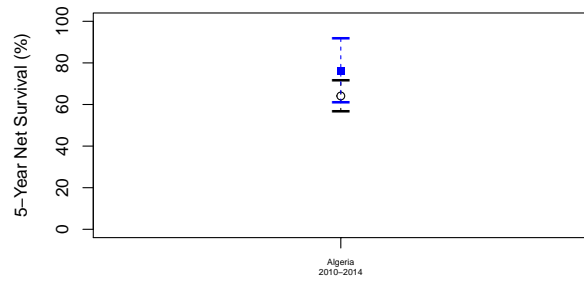

**Northern America**

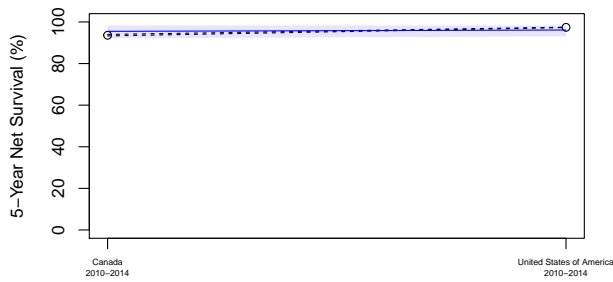

**Northern Europe**

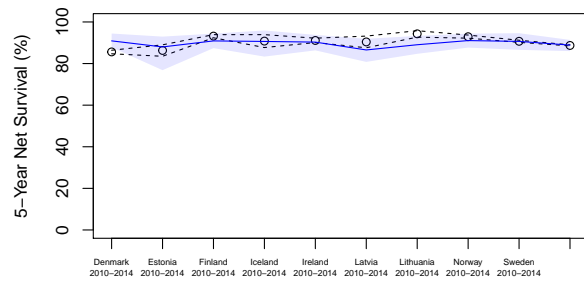

**South-Eastern Asia**

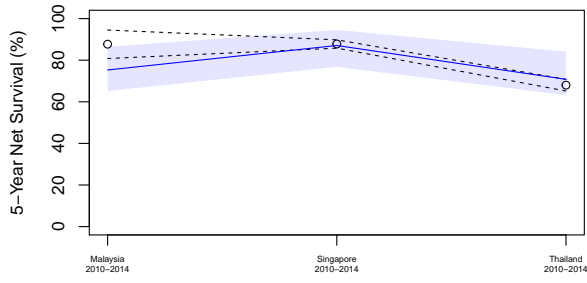

**South America**

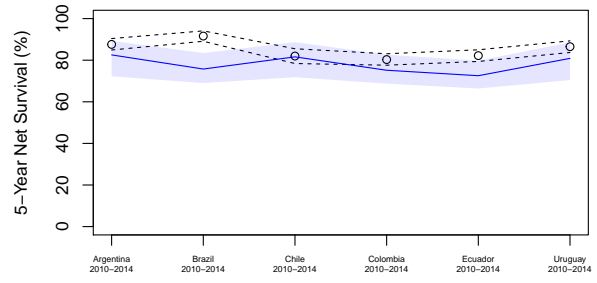

**Southern Asia**

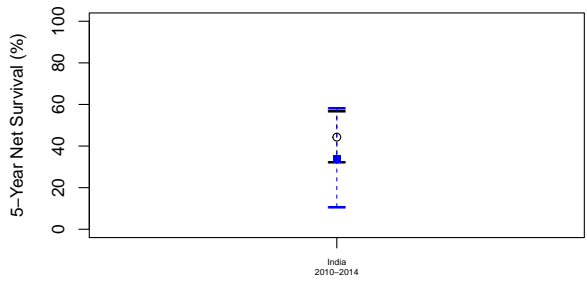

**Southern Europe**

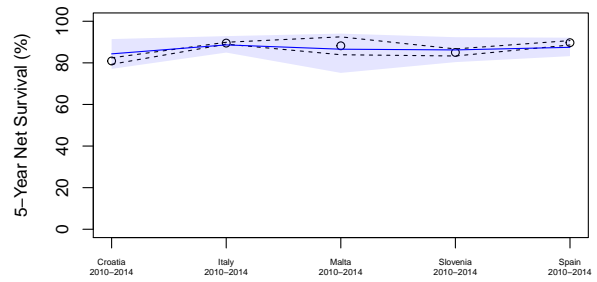

**Western Africa**

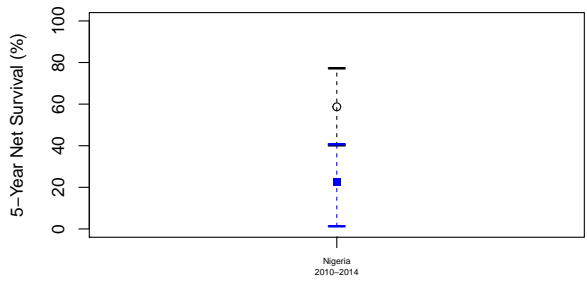

**Western Asia**

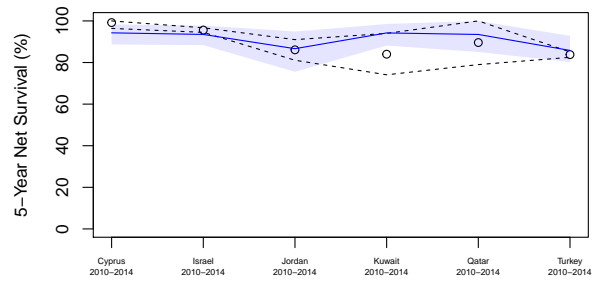

### Western Europe

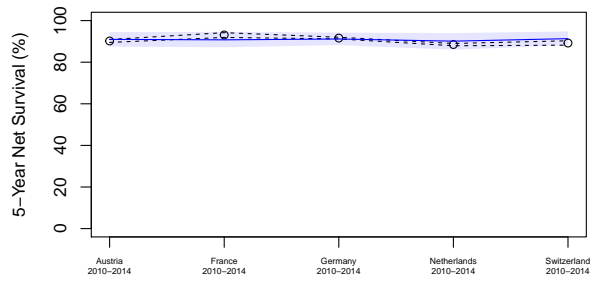

## 2.5 Validation Checks

Here we plot our modeled survival estimates (mean and 95% UI of the posterior predicted estimates) compared to the 50 randomly selected CONCORD estimates not used to calibrate the model (i.e. testing set). Black lines indicate CONCORD estimates and 95% CI. Blue lines and shaded regions indicate modeled means and 95% UI.

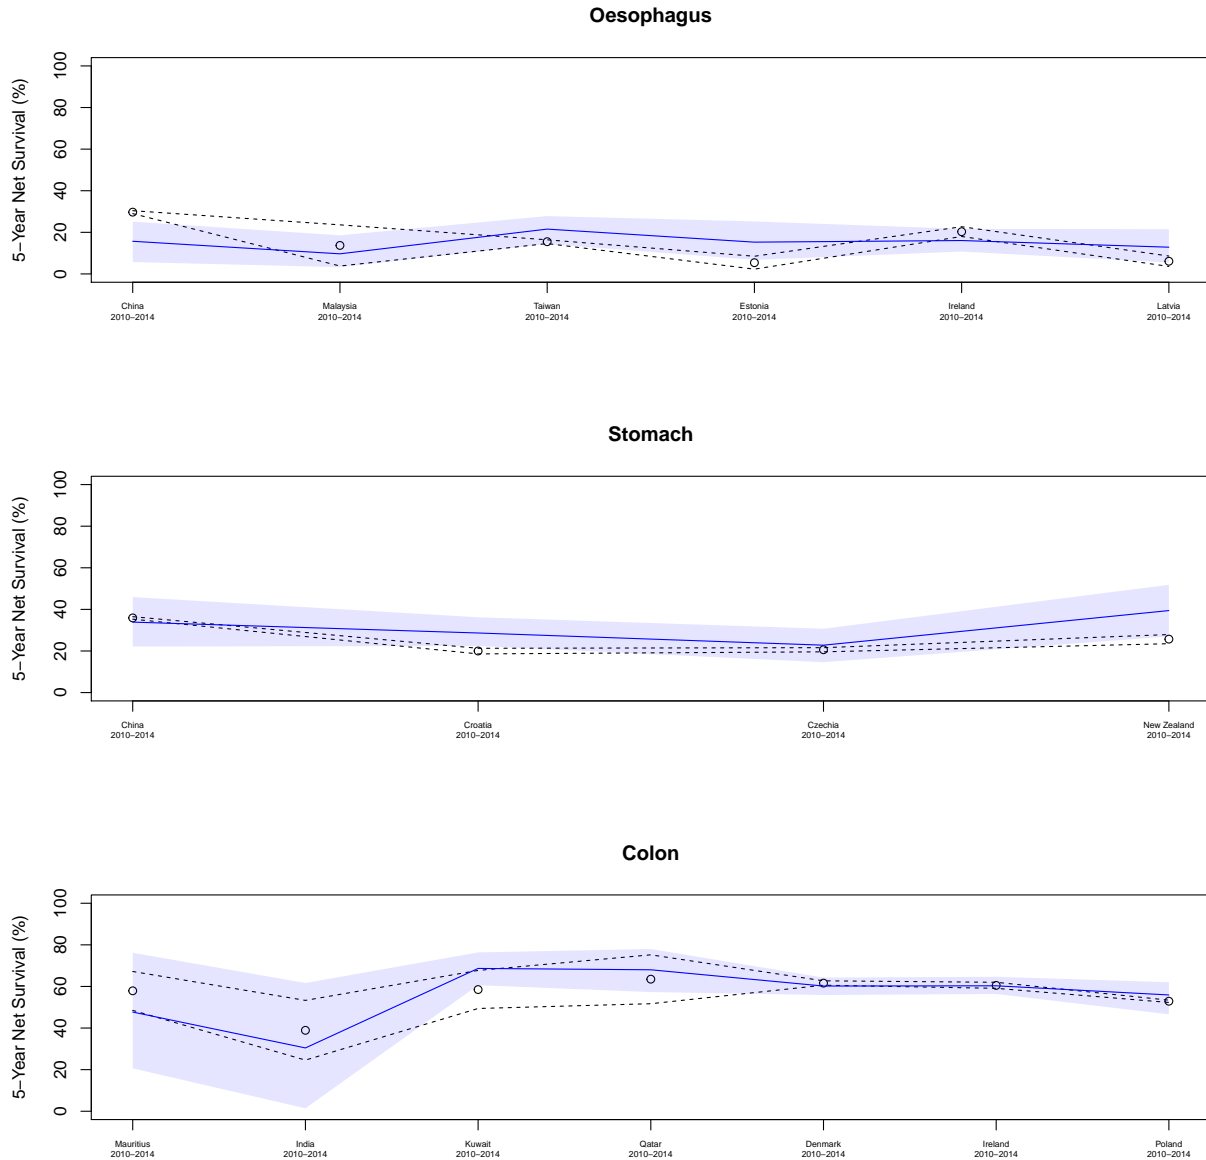

### Rectum-Anus

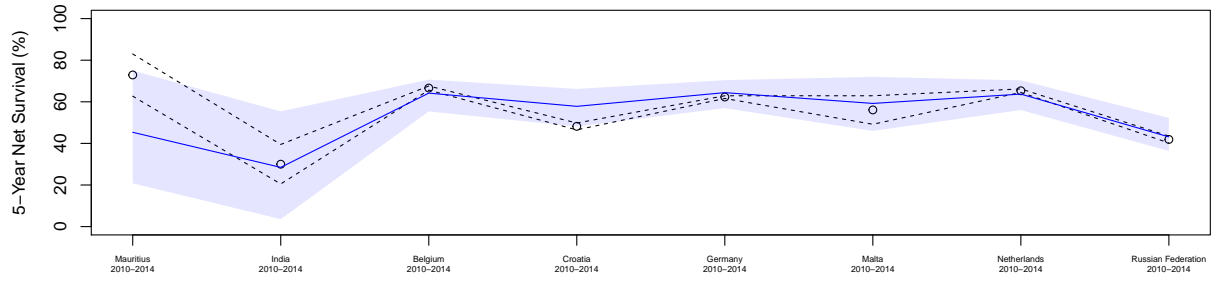

### Liver

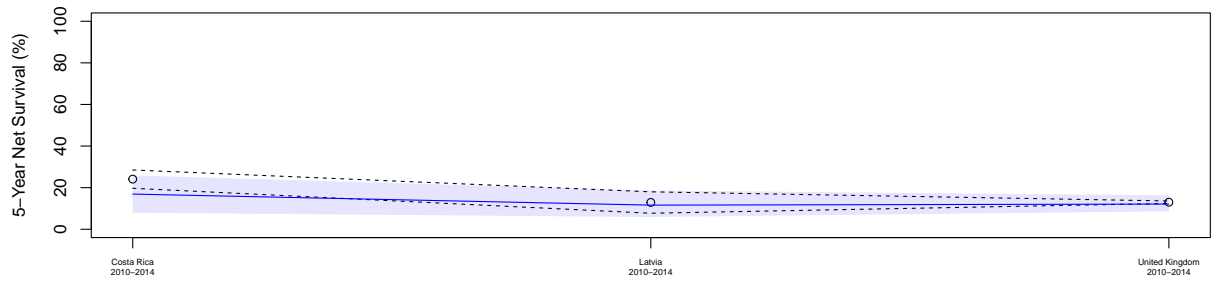

### Pancreas

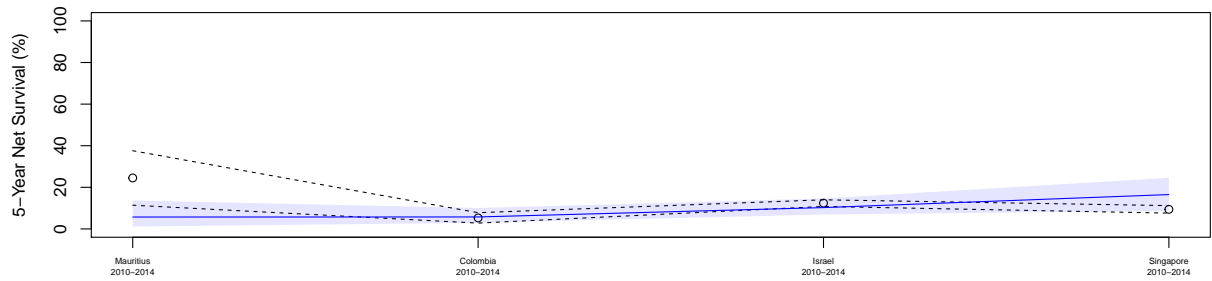

### Lung

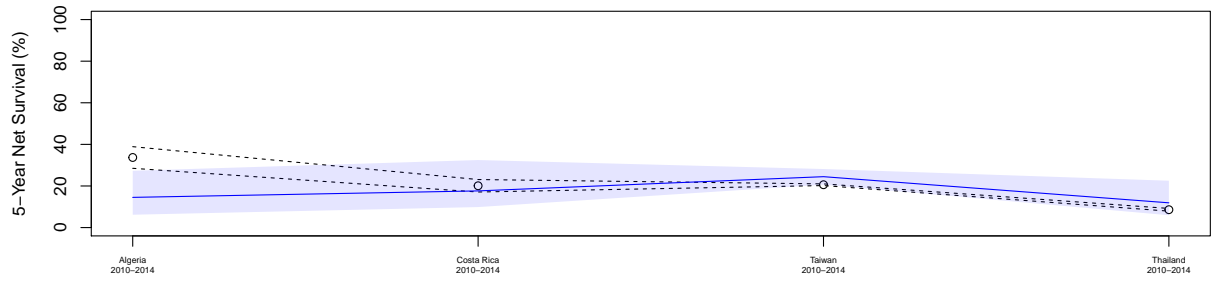

### Breast

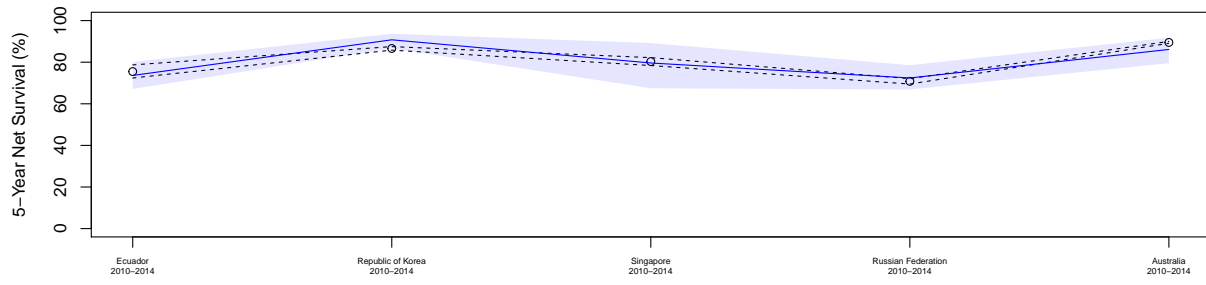

### Cervix

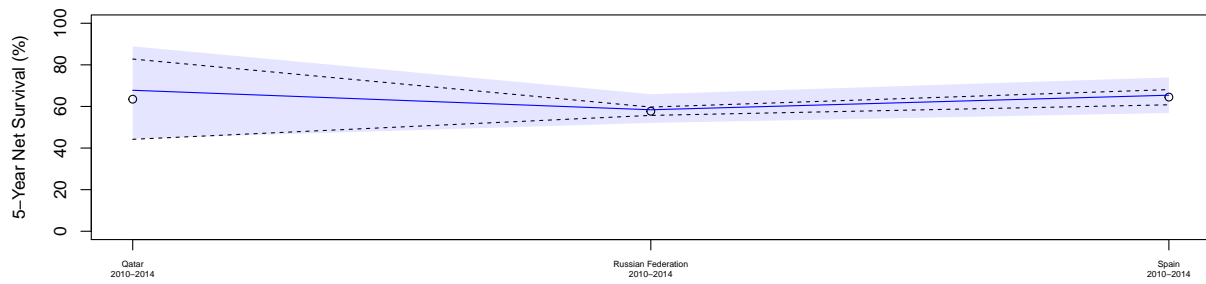

### Prostate

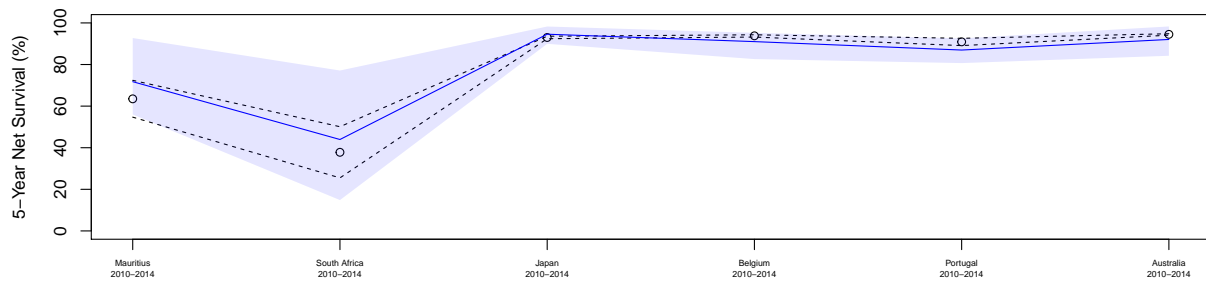

## 2.6 Maximum Achievable Survival - Posteriors

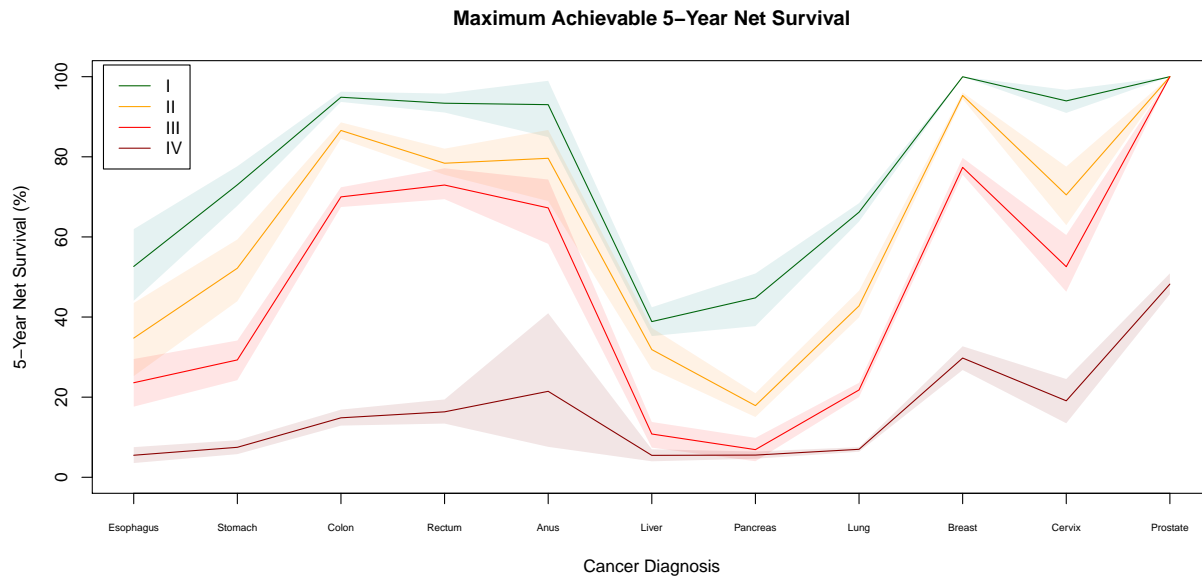

## 2.7 Treatment Effects - Posteriors

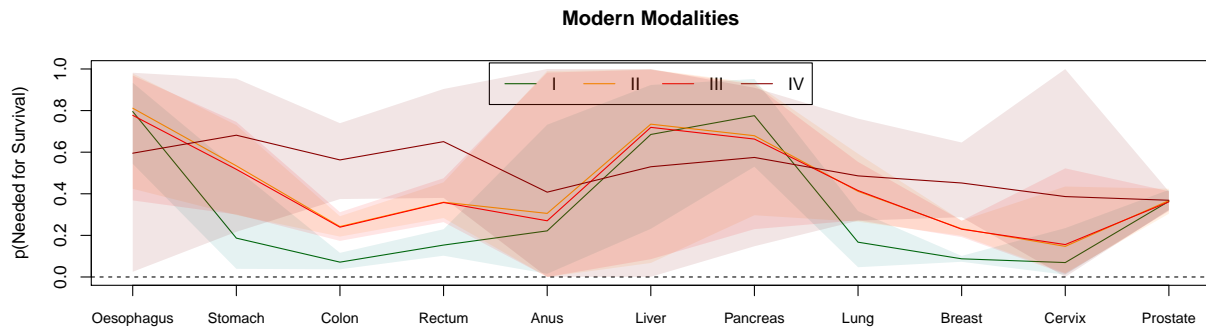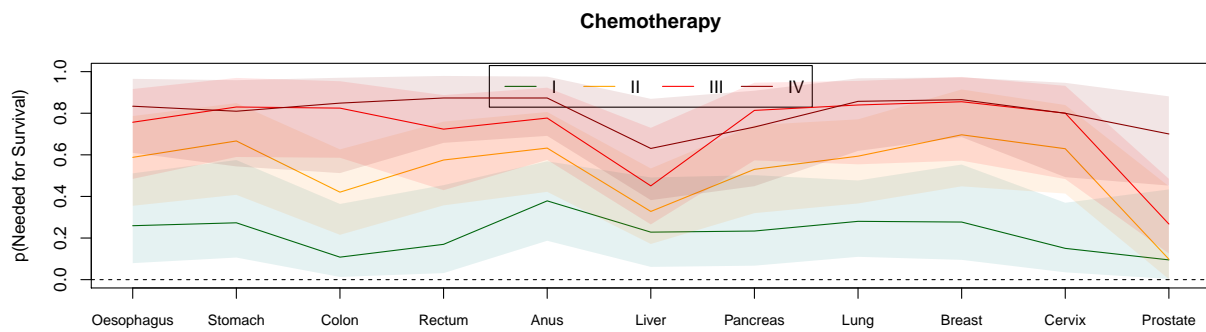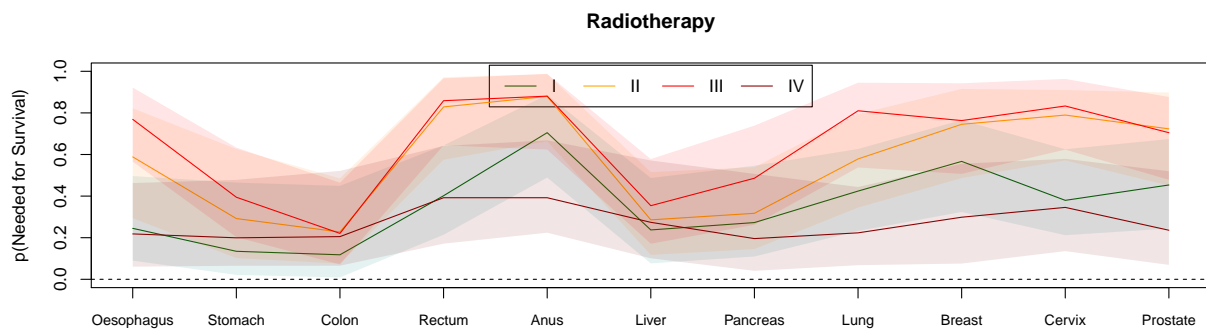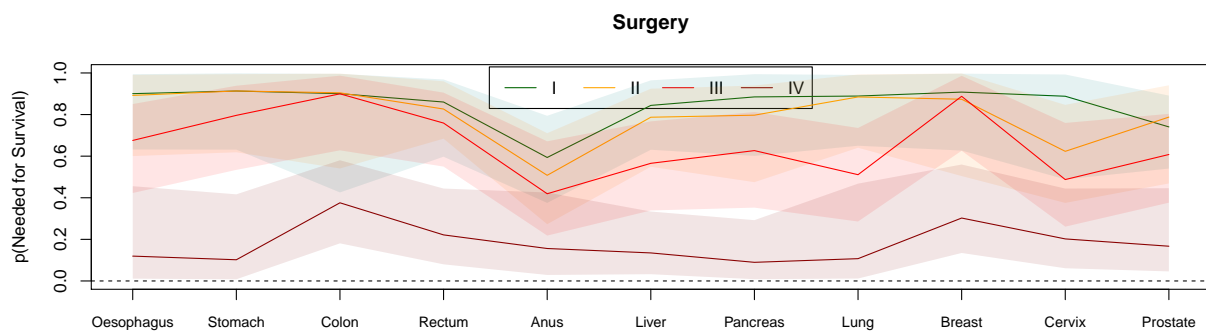



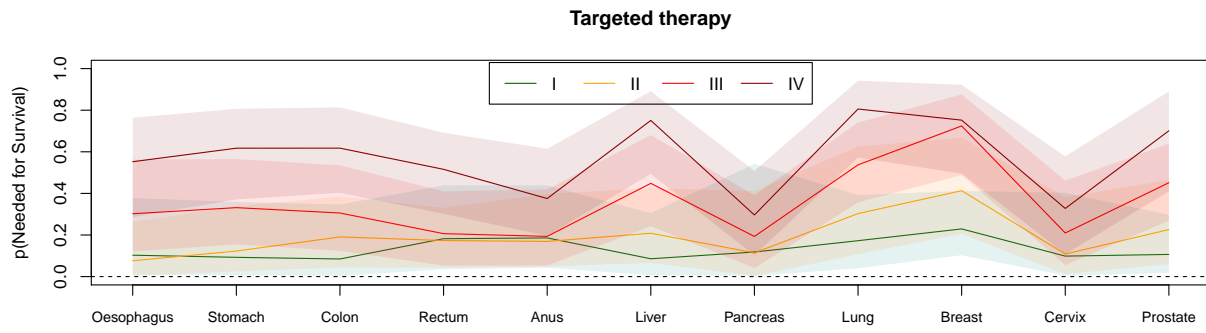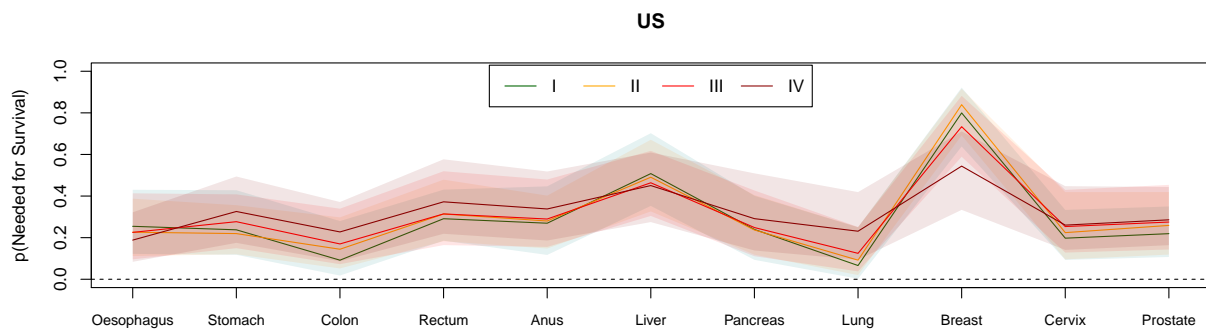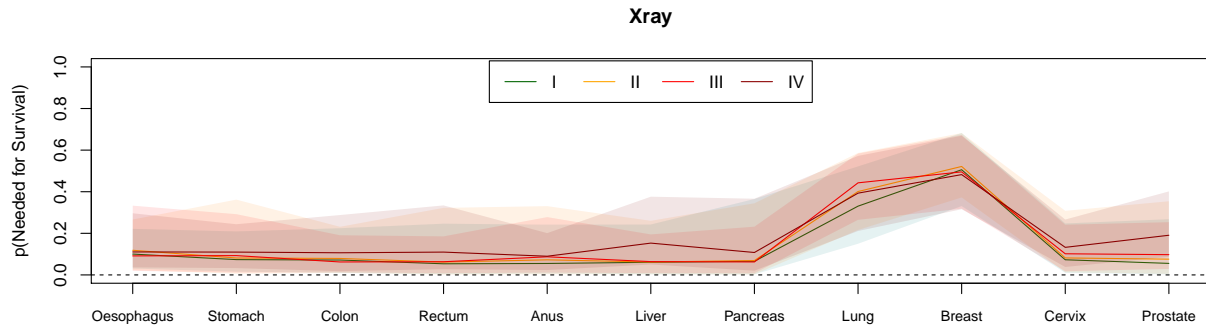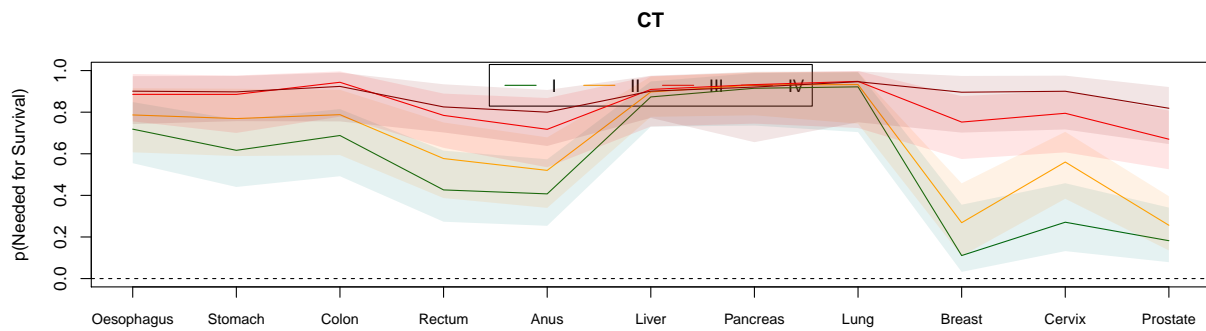

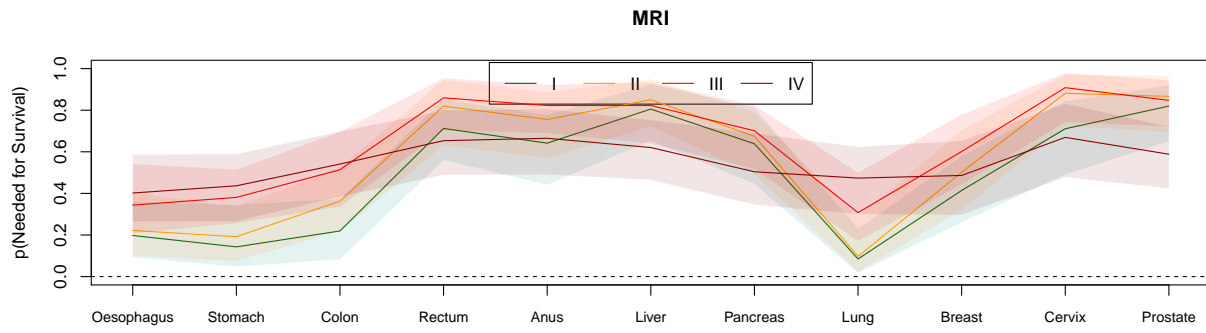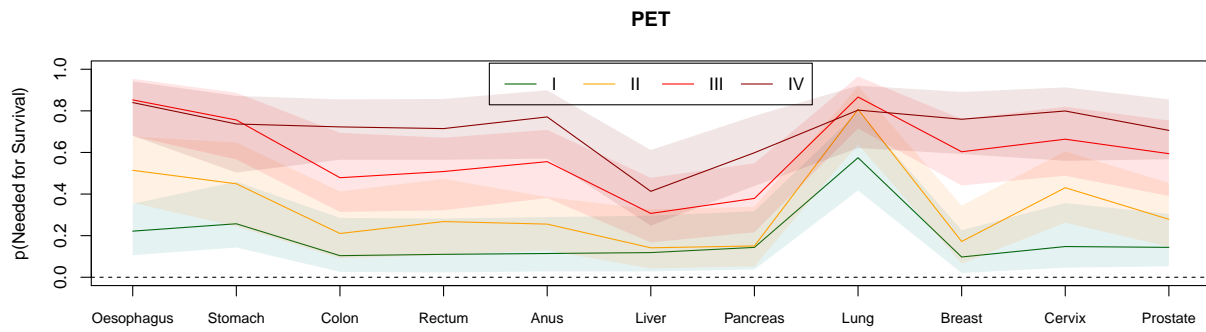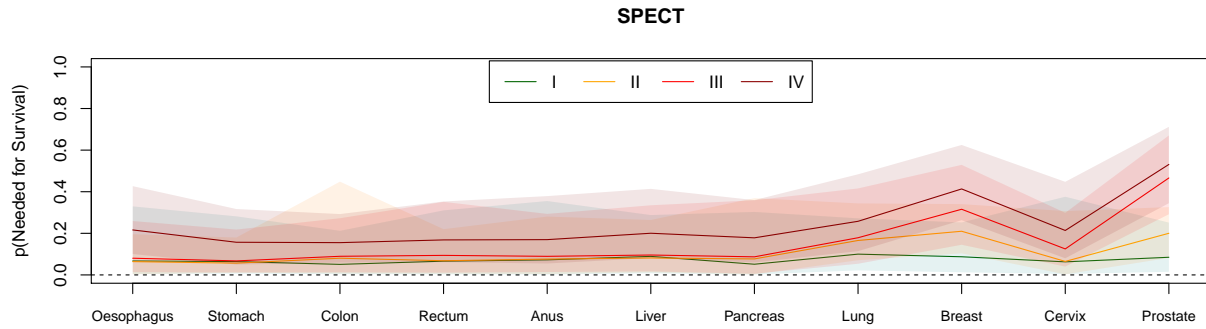

### 3 Additional Results

#### 3.1 Policy Intervention Scenarios

| Scenario                                             | Scale to Mean of High-Income Countries |              |         |                  |                    |       |    |     |     |       | Quality of Care |
|------------------------------------------------------|----------------------------------------|--------------|---------|------------------|--------------------|-------|----|-----|-----|-------|-----------------|
|                                                      | Treatment Modalities                   |              |         |                  | Imaging Modalities |       |    |     |     |       |                 |
|                                                      | Chemotherapy                           | Radiotherapy | Surgery | Targeted Therapy | Ultrasound         | X-ray | CT | MRI | PET | SPECT |                 |
| Baseline                                             |                                        |              |         |                  |                    |       |    |     |     |       |                 |
| <i>Individual Treatment Policies</i>                 |                                        |              |         |                  |                    |       |    |     |     |       |                 |
| Chemotherapy                                         | X                                      |              |         |                  |                    |       |    |     |     |       |                 |
| Radiotherapy                                         |                                        | X            |         |                  |                    |       |    |     |     |       |                 |
| Surgery                                              |                                        |              | X       |                  |                    |       |    |     |     |       |                 |
| Targeted therapy                                     |                                        |              |         | X                |                    |       |    |     |     |       |                 |
| Quality                                              |                                        |              |         |                  |                    |       |    |     |     |       | X               |
| <i>Individual Imaging Policies</i>                   |                                        |              |         |                  |                    |       |    |     |     |       |                 |
| Ultrasound                                           |                                        |              |         |                  | X                  |       |    |     |     |       |                 |
| X-ray                                                |                                        |              |         |                  |                    | X     |    |     |     |       |                 |
| CT                                                   |                                        |              |         |                  |                    |       | X  |     |     |       |                 |
| MRI                                                  |                                        |              |         |                  |                    |       |    | X   |     |       |                 |
| PET                                                  |                                        |              |         |                  |                    |       |    |     | X   |       |                 |
| SPECT                                                |                                        |              |         |                  |                    |       |    |     |     | X     |                 |
| <i>Policy Packages</i>                               |                                        |              |         |                  |                    |       |    |     |     |       |                 |
| Treatment Only - No Quality                          | X                                      | X            | X       | X                |                    |       |    |     |     |       |                 |
| Imaging Only - No Quality                            |                                        |              |         |                  | X                  | X     | X  | X   | X   | X     |                 |
| Comprehensive - No Quality                           | X                                      | X            | X       | X                | X                  | X     | X  | X   | X   | X     |                 |
| Treatment Only + Quality                             | X                                      | X            | X       | X                |                    |       |    |     |     |       | X               |
| Imaging Only + Quality                               |                                        |              |         |                  | X                  | X     | X  | X   | X   | X     | X               |
| Comprehensive + No Quality                           | X                                      | X            | X       | X                | X                  | X     | X  | X   | X   | X     | X               |
| Treatment (Traditional)                              | X                                      | X            | X       |                  |                    |       |    |     |     |       | X               |
| Imaging (Traditional)                                |                                        |              |         |                  | X                  | X     |    |     |     |       | X               |
| Treatment (Traditional) + Imaging (Traditional)      | X                                      | X            | X       |                  | X                  | X     |    |     |     |       | X               |
| Treatment (Traditional) + Imaging (Traditional) + CT | X                                      | X            | X       |                  | X                  | X     | X  |     |     |       | X               |

#### 3.2 Estimated 5-Year Net Survival by Country for Cancers Diagnosed in 2018, 11 Modeled Cancers Combined

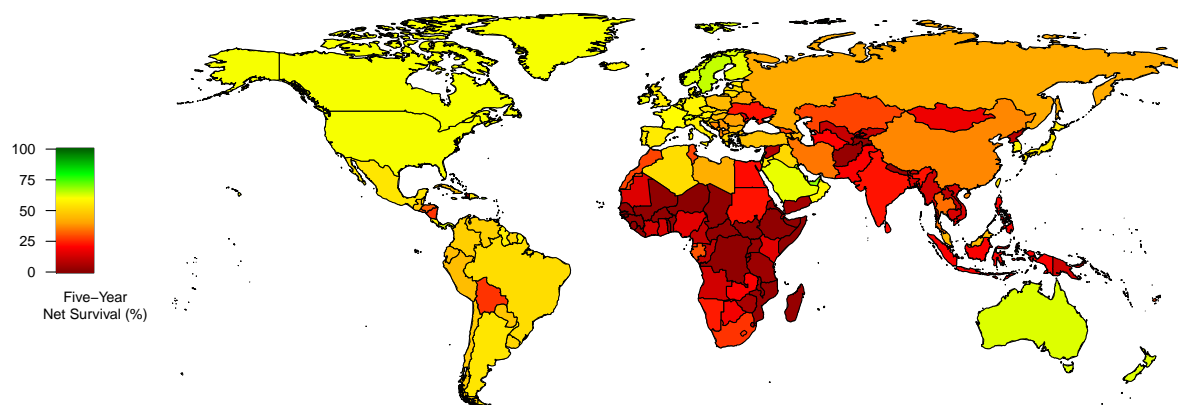

### 3.3 Cancer Deaths by Income Group

Here we plot the population size by income group and the number of estimated cancer deaths per 100,000 population. We see that low income countries comprise only 10% of the global population, which partly explains why the total cancer deaths in low income countries is a small proportion of total cancer deaths. In addition, higher competing risks (i.e. other causes of mortality) mean that the population is generally younger in low income countries, and thus cancer incidence is lower. Also, it is important to note that these estimates are based on reported (diagnosed) cases of cancer, and thus likely underestimate total cancer cases and deaths in the population that are not diagnosed due to health system weaknesses, especially in low income countries.

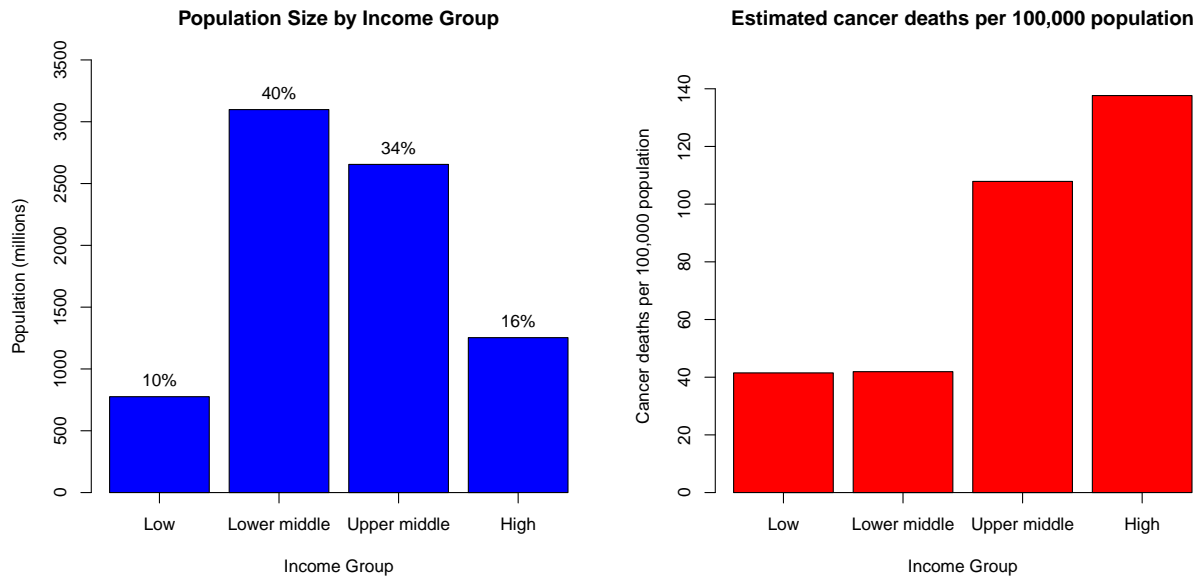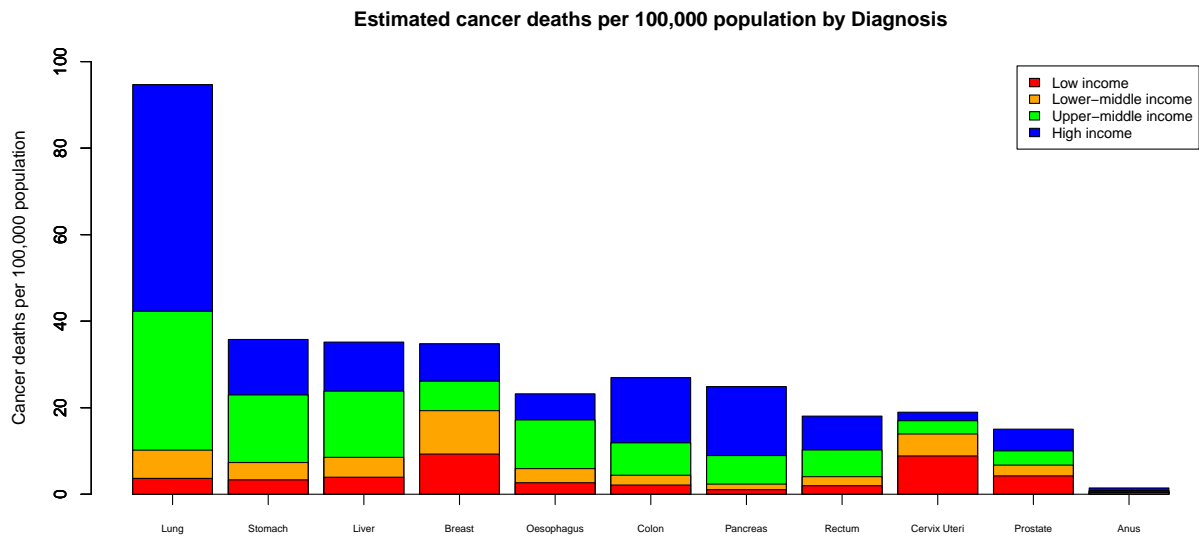

### 3.4 Estimated Absolute Survival Gains from Policy Package Interventions

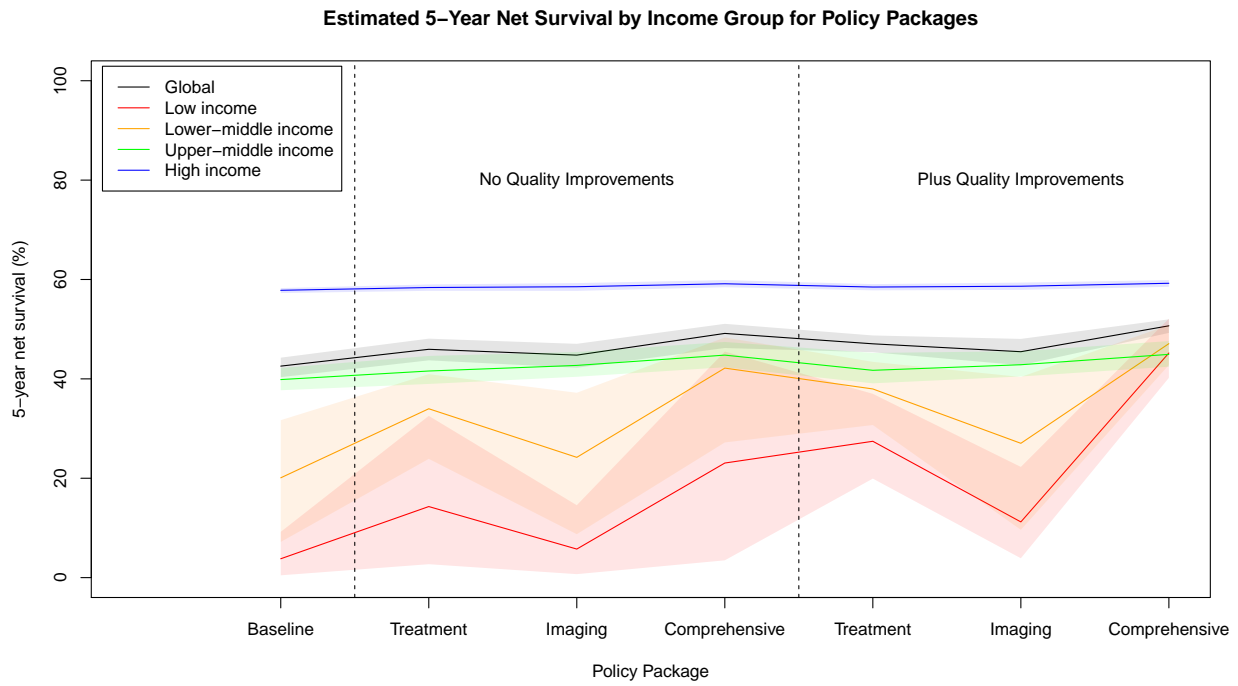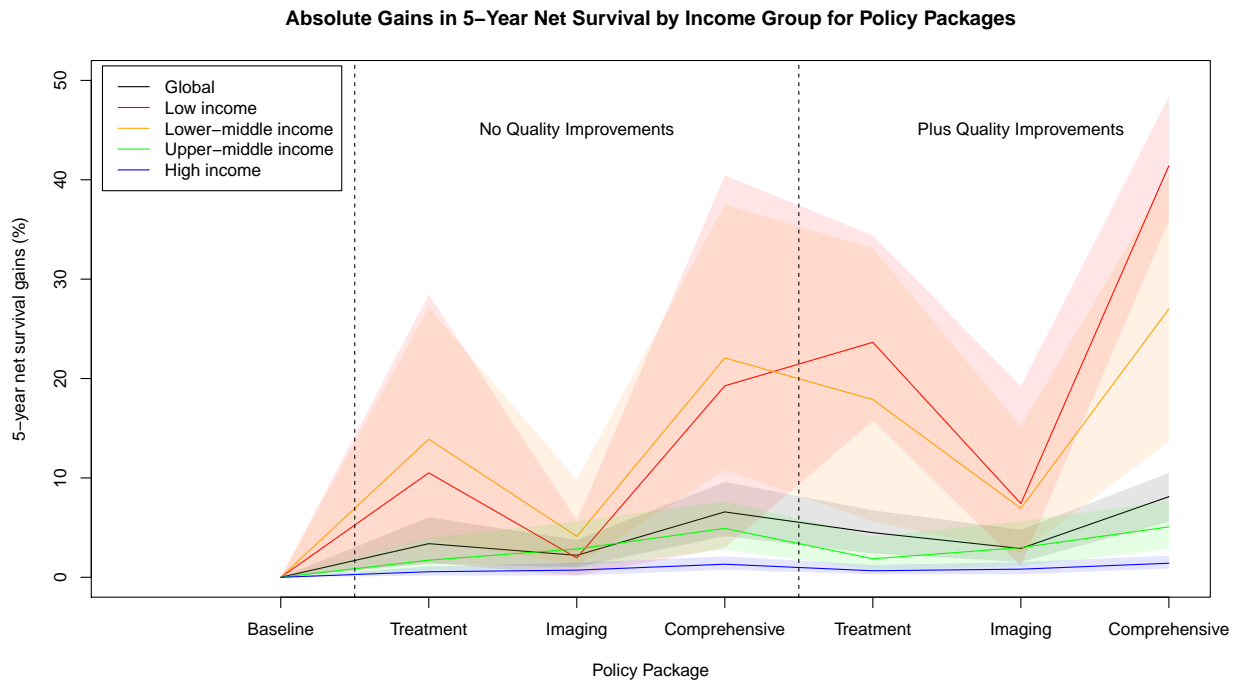

## 4 Country Profiles

Here we plot the estimated incidence and survival by cancer for each country, as well as the calibrated model parameters of treatment and imaging availability. Specifically, the following plots are provided:

| Plot Title                                             | Description                                                                                                                                            |
|--------------------------------------------------------|--------------------------------------------------------------------------------------------------------------------------------------------------------|
| Estimated new diagnosed cases per year (GLOBOCAN 2018) | Estimated number of incident (diagnosed) cases from GLOBOCAN 2018. Circles represent point estimates. Dotted lines represent 95% uncertainty intervals |
| Age at diagnosis                                       | Estimated proportion of incident cases by age group, according to GLOBOCAN 2018. Shaded areas represent 95% uncertainty intervals                      |
| 5-year net survival – overall                          | Modeled survival by cancer site. Shaded areas represent 95% uncertainty intervals                                                                      |
| Stage distribution at diagnosis                        | Modeled stage distribution at diagnosis by cancer site. Shaded areas represent 95% uncertainty intervals                                               |
| 5-year net survival – by stage                         | Modeled stage-specific survival by cancer site. Shaded areas represent 95% uncertainty intervals                                                       |
| Treatment availability                                 | Calibrated parameters of treatment availability. Vertical density plots display the posterior probability density of each parameter                    |
| Imaging availability                                   | Calibrated parameters of imaging availability. Vertical density plots display the posterior probability density of each parameter                      |

# Afghanistan

| ISO Code | Region        | Area | Income Group |
|----------|---------------|------|--------------|
| AFG      | Southern Asia | Asia | Low income   |

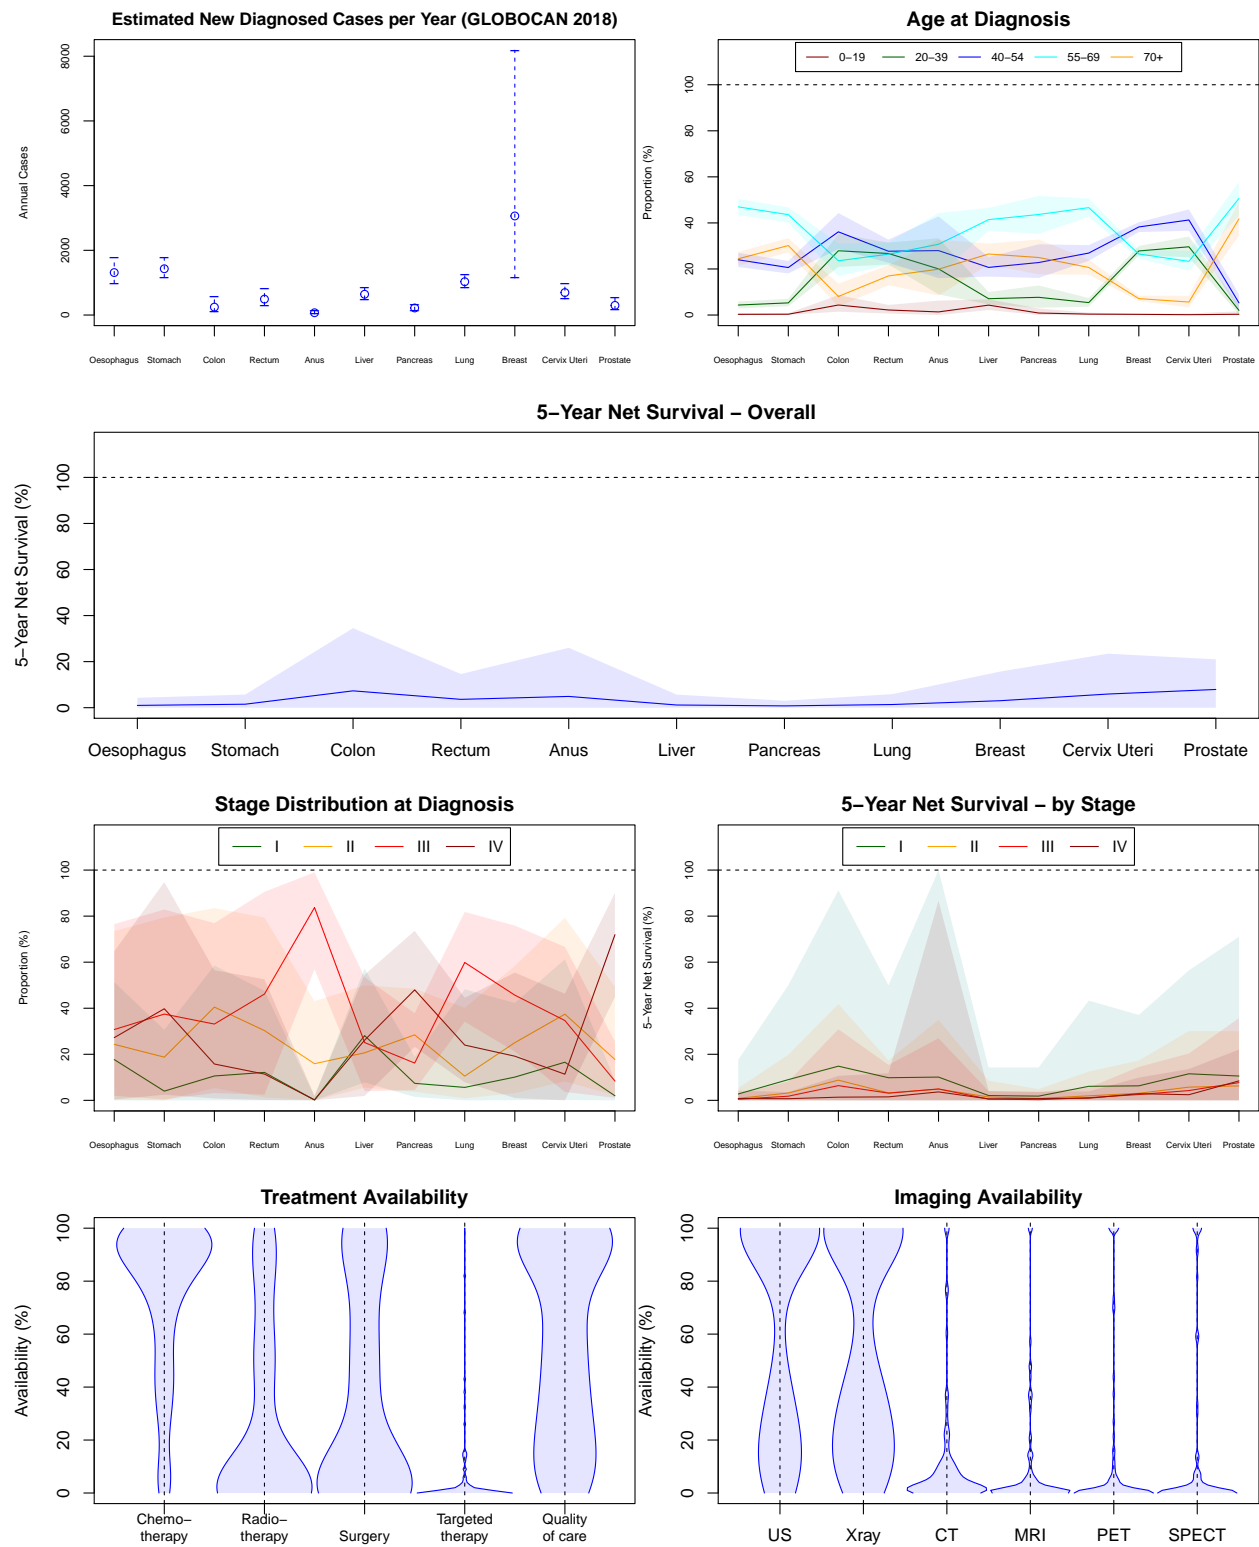

# Albania

| ISO Code | Region          | Area   | Income Group        |
|----------|-----------------|--------|---------------------|
| ALB      | Southern Europe | Europe | Upper middle income |

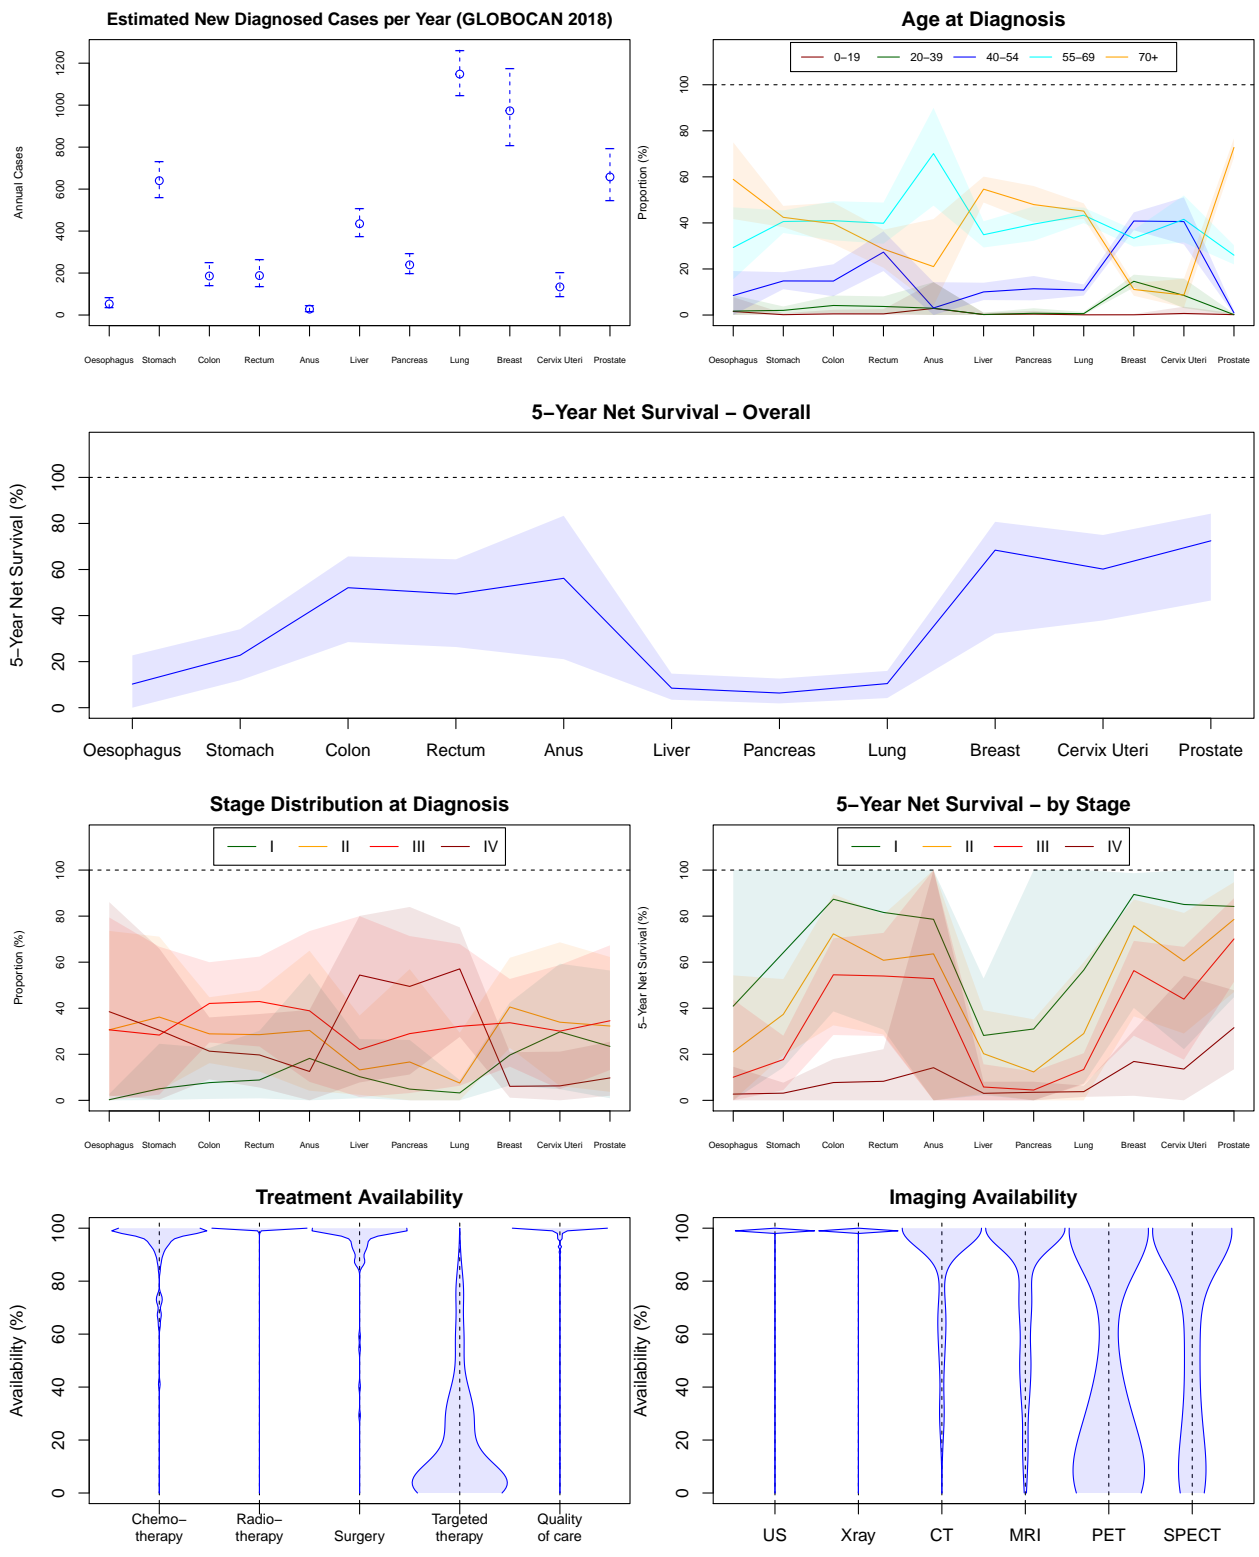



# Algeria

| ISO Code | Region          | Area   | Income Group        |
|----------|-----------------|--------|---------------------|
| DZA      | Northern Africa | Africa | Upper middle income |

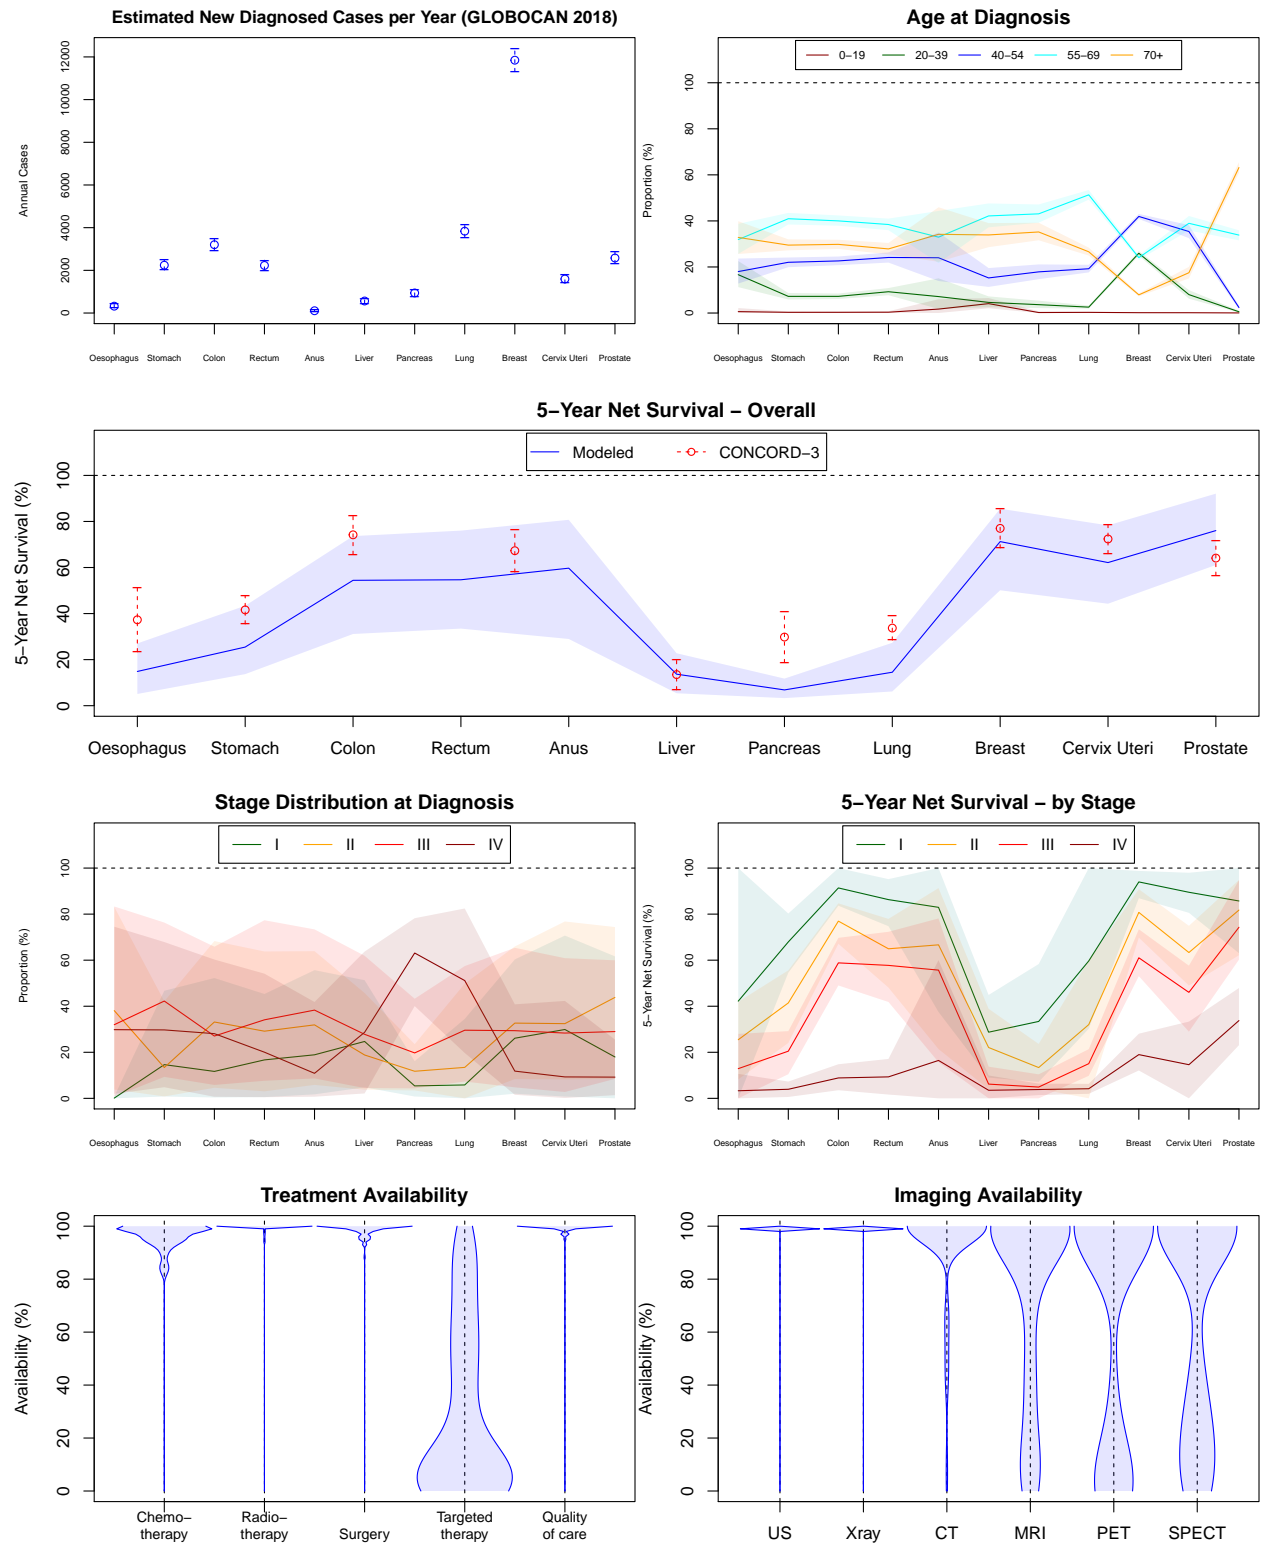

# Andorra

| ISO Code | Region          | Area   | Income Group |
|----------|-----------------|--------|--------------|
| AND      | Southern Europe | Europe | High income  |

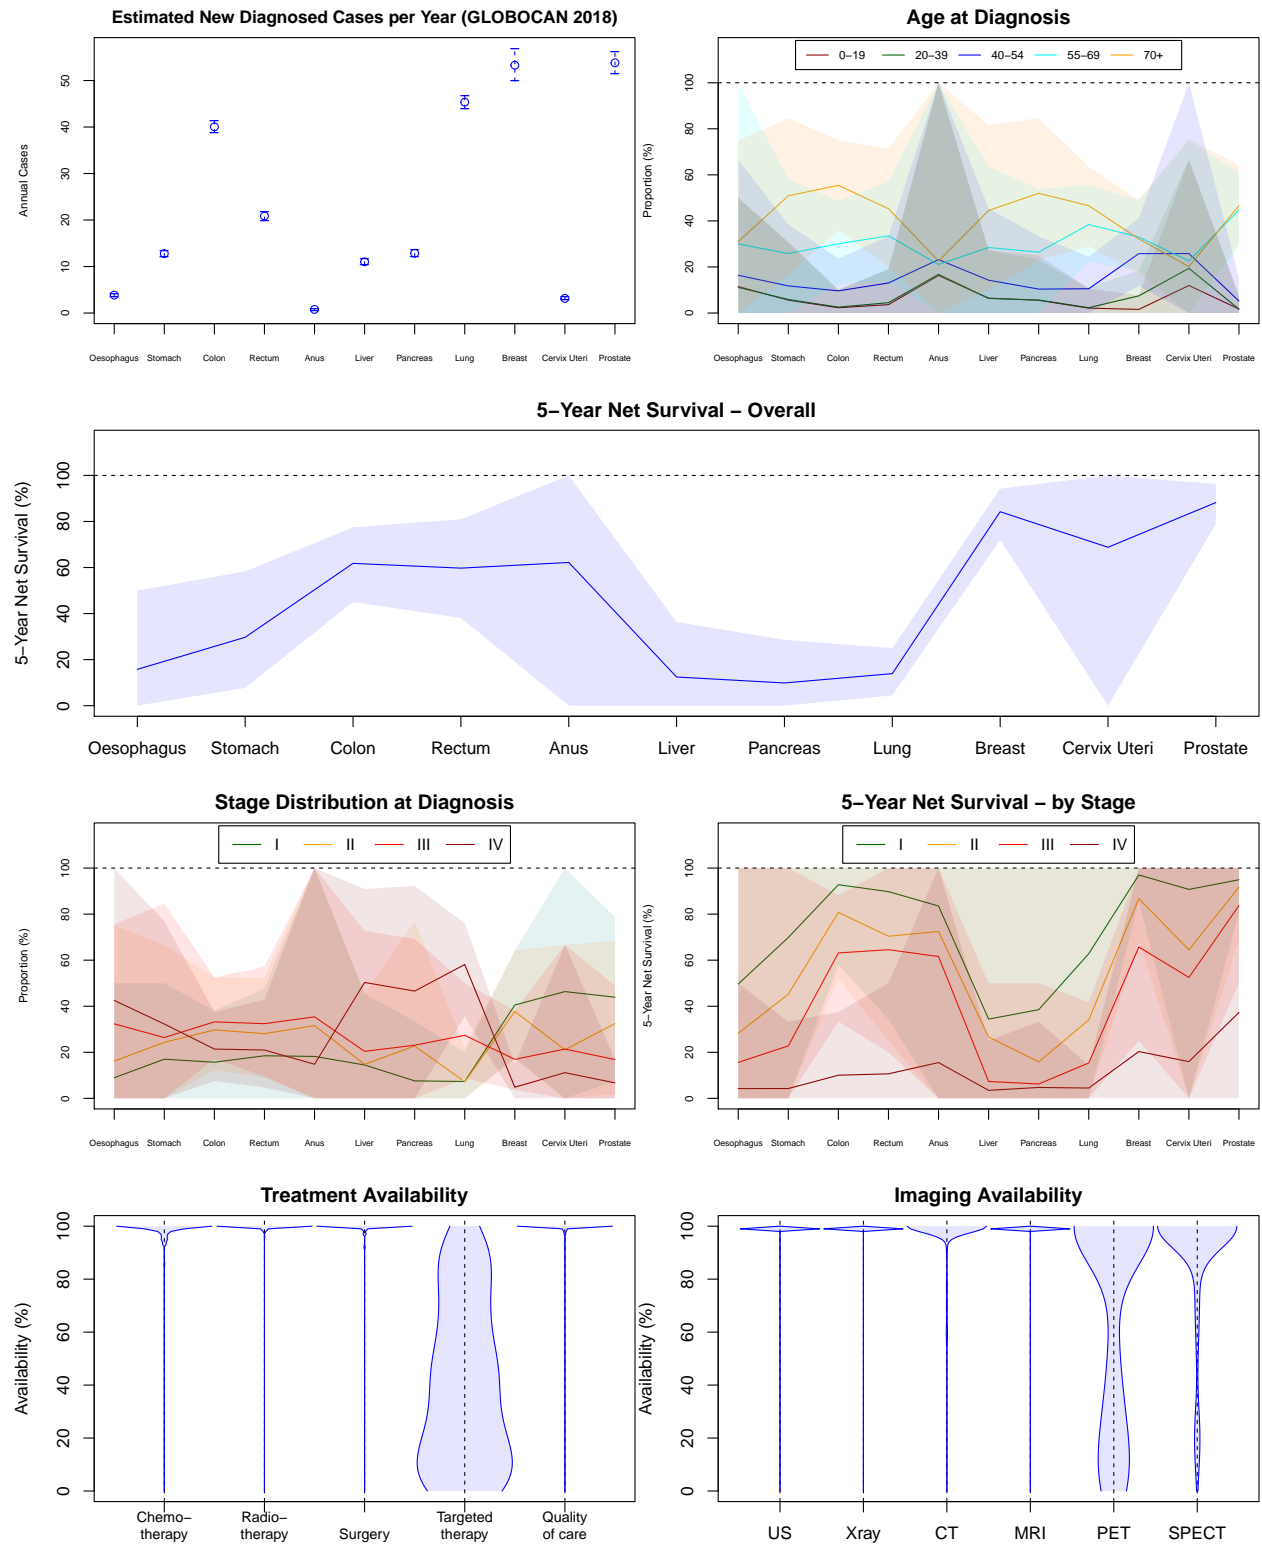

# Angola

| ISO Code | Region        | Area   | Income Group        |
|----------|---------------|--------|---------------------|
| AGO      | Middle Africa | Africa | Lower middle income |

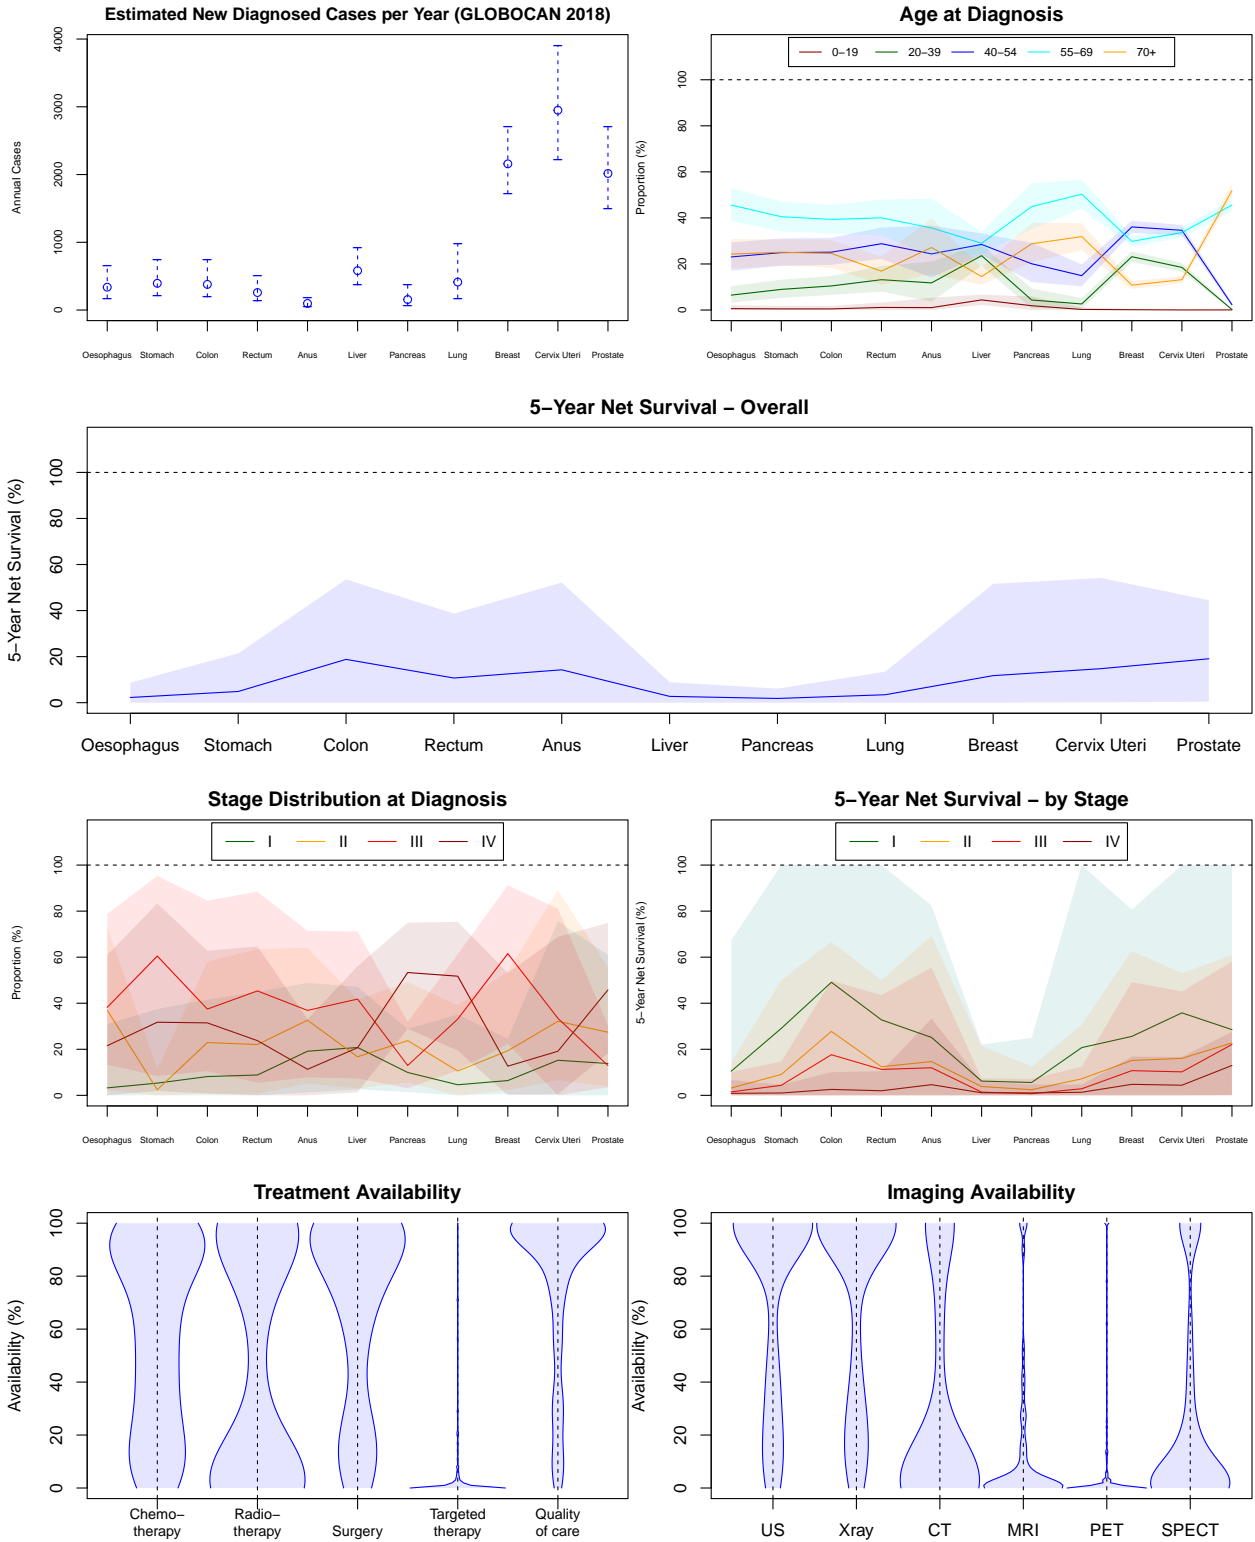

# Antigua and Barbuda

| ISO Code | Region    | Area                            | Income Group |
|----------|-----------|---------------------------------|--------------|
| ATG      | Caribbean | Latin America and the Caribbean | High income  |

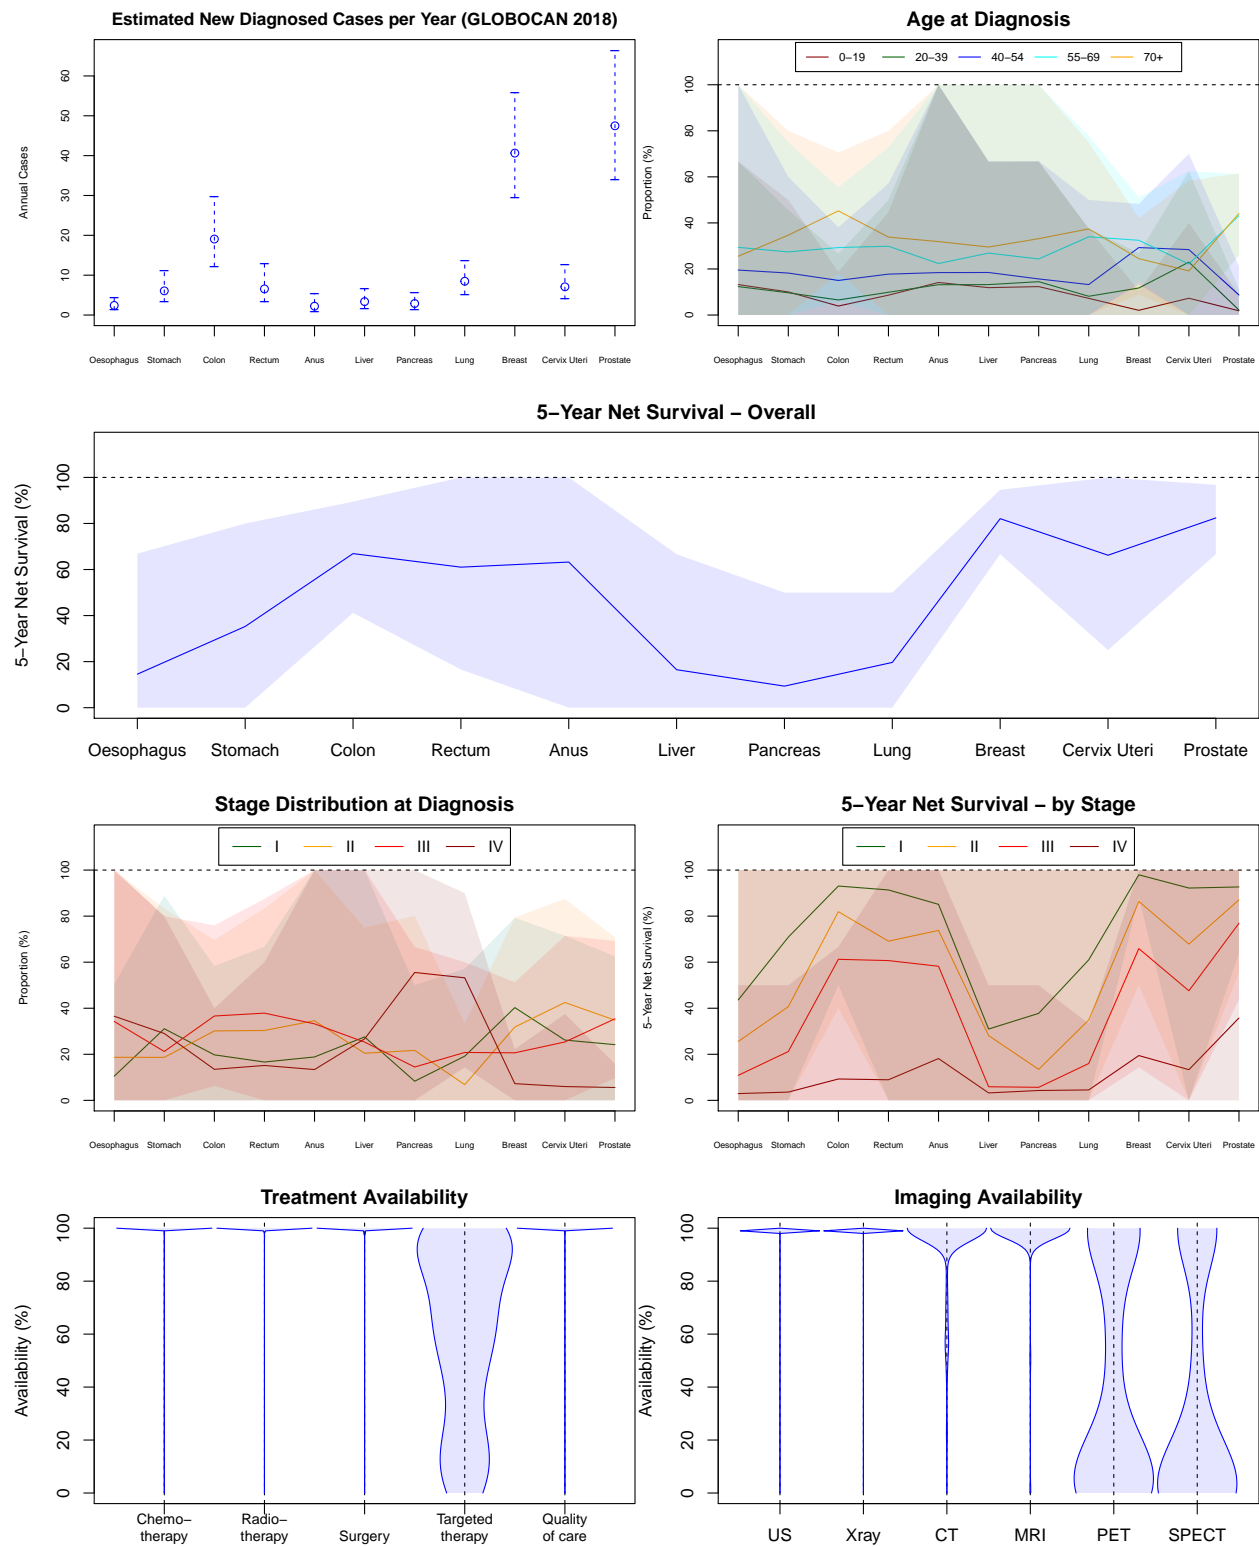

# Argentina

| ISO Code | Region        | Area                            | Income Group |
|----------|---------------|---------------------------------|--------------|
| ARG      | South America | Latin America and the Caribbean | High income  |

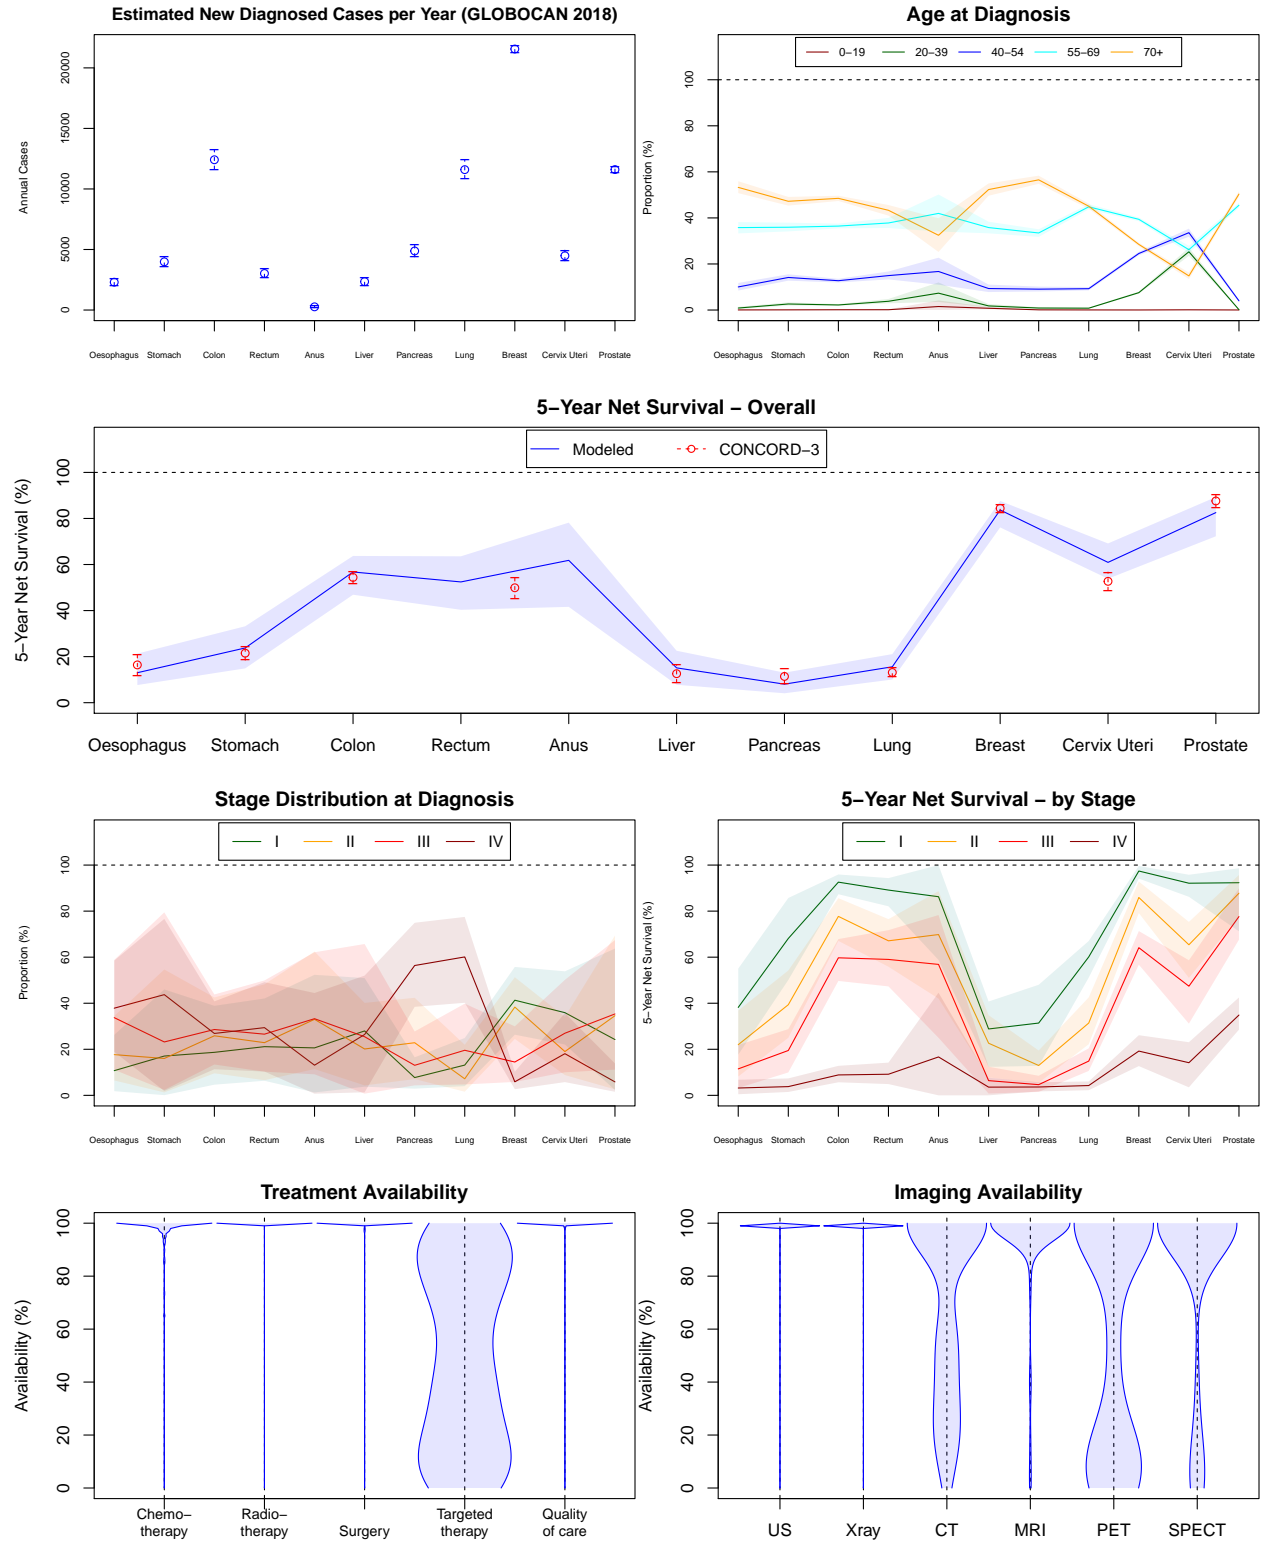

# Armenia

| ISO Code | Region       | Area | Income Group        |
|----------|--------------|------|---------------------|
| ARM      | Western Asia | Asia | Upper middle income |

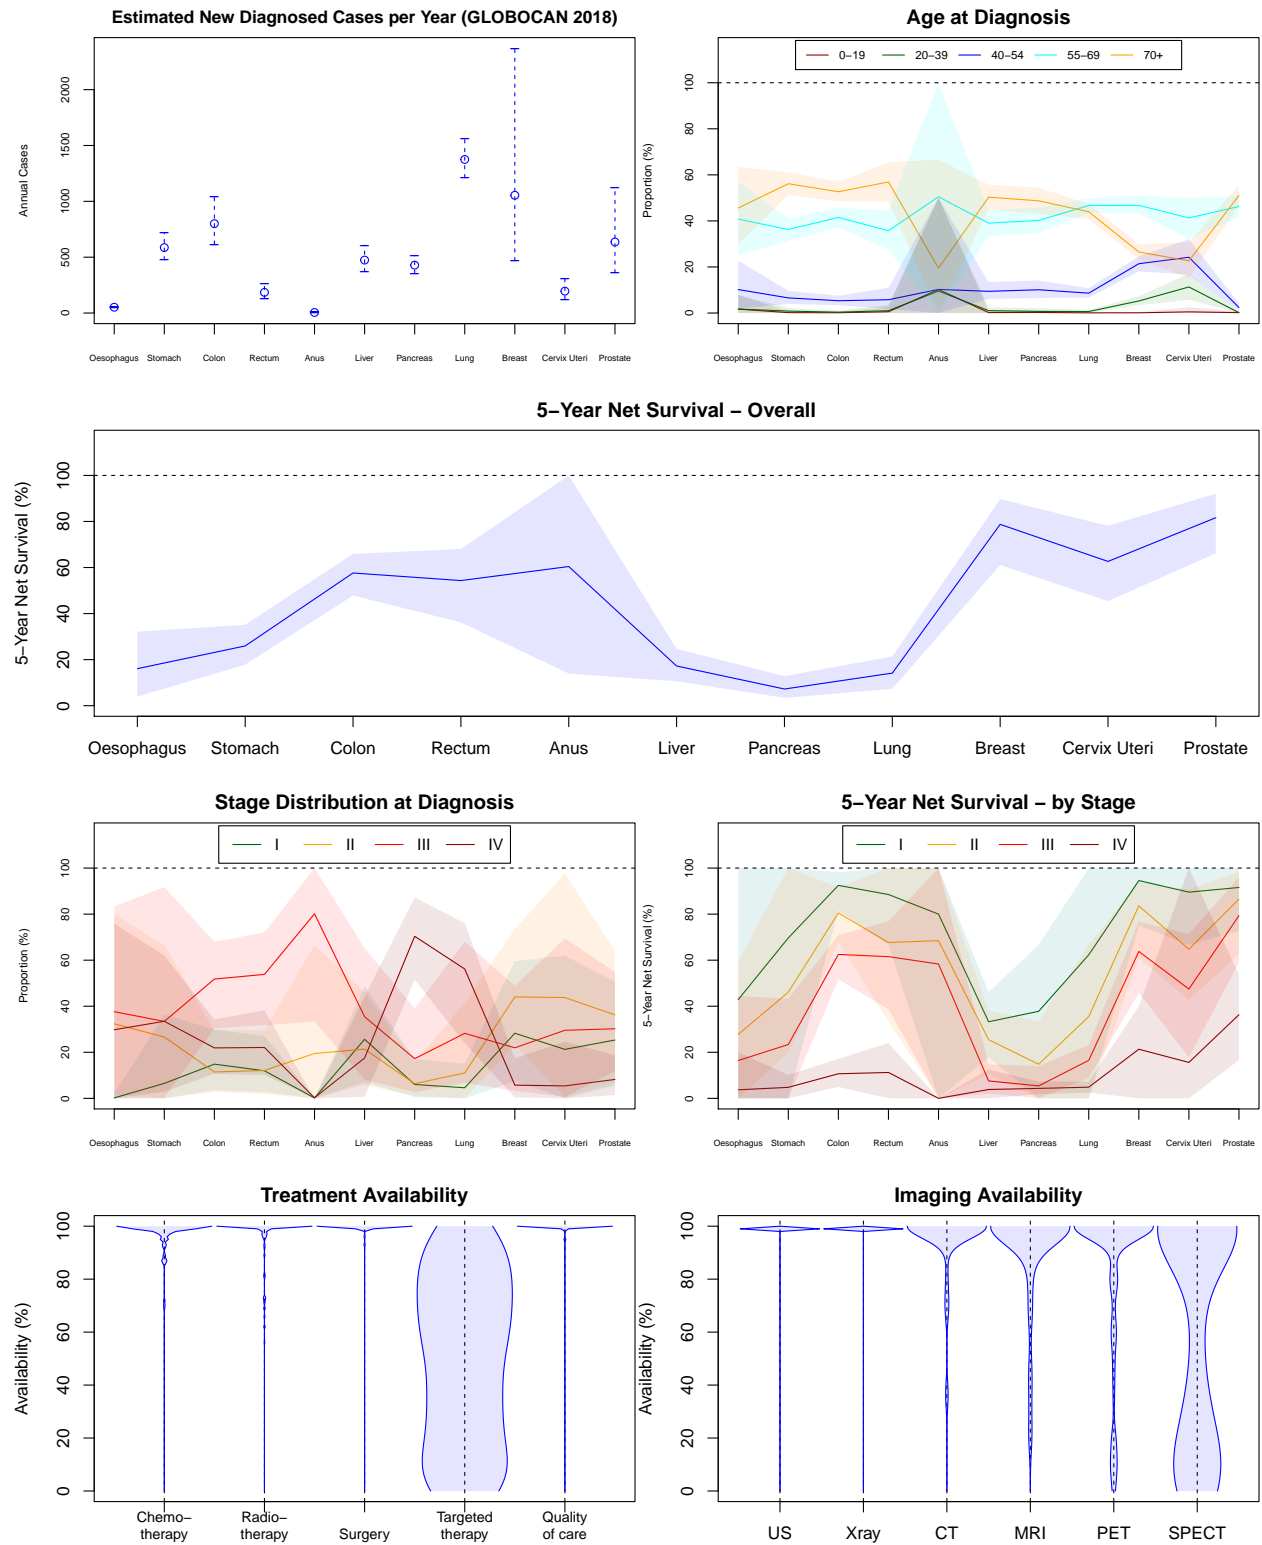

# Australia

| ISO Code | Region                | Area    | Income Group |
|----------|-----------------------|---------|--------------|
| AUS      | Australia/New Zealand | Oceania | High income  |

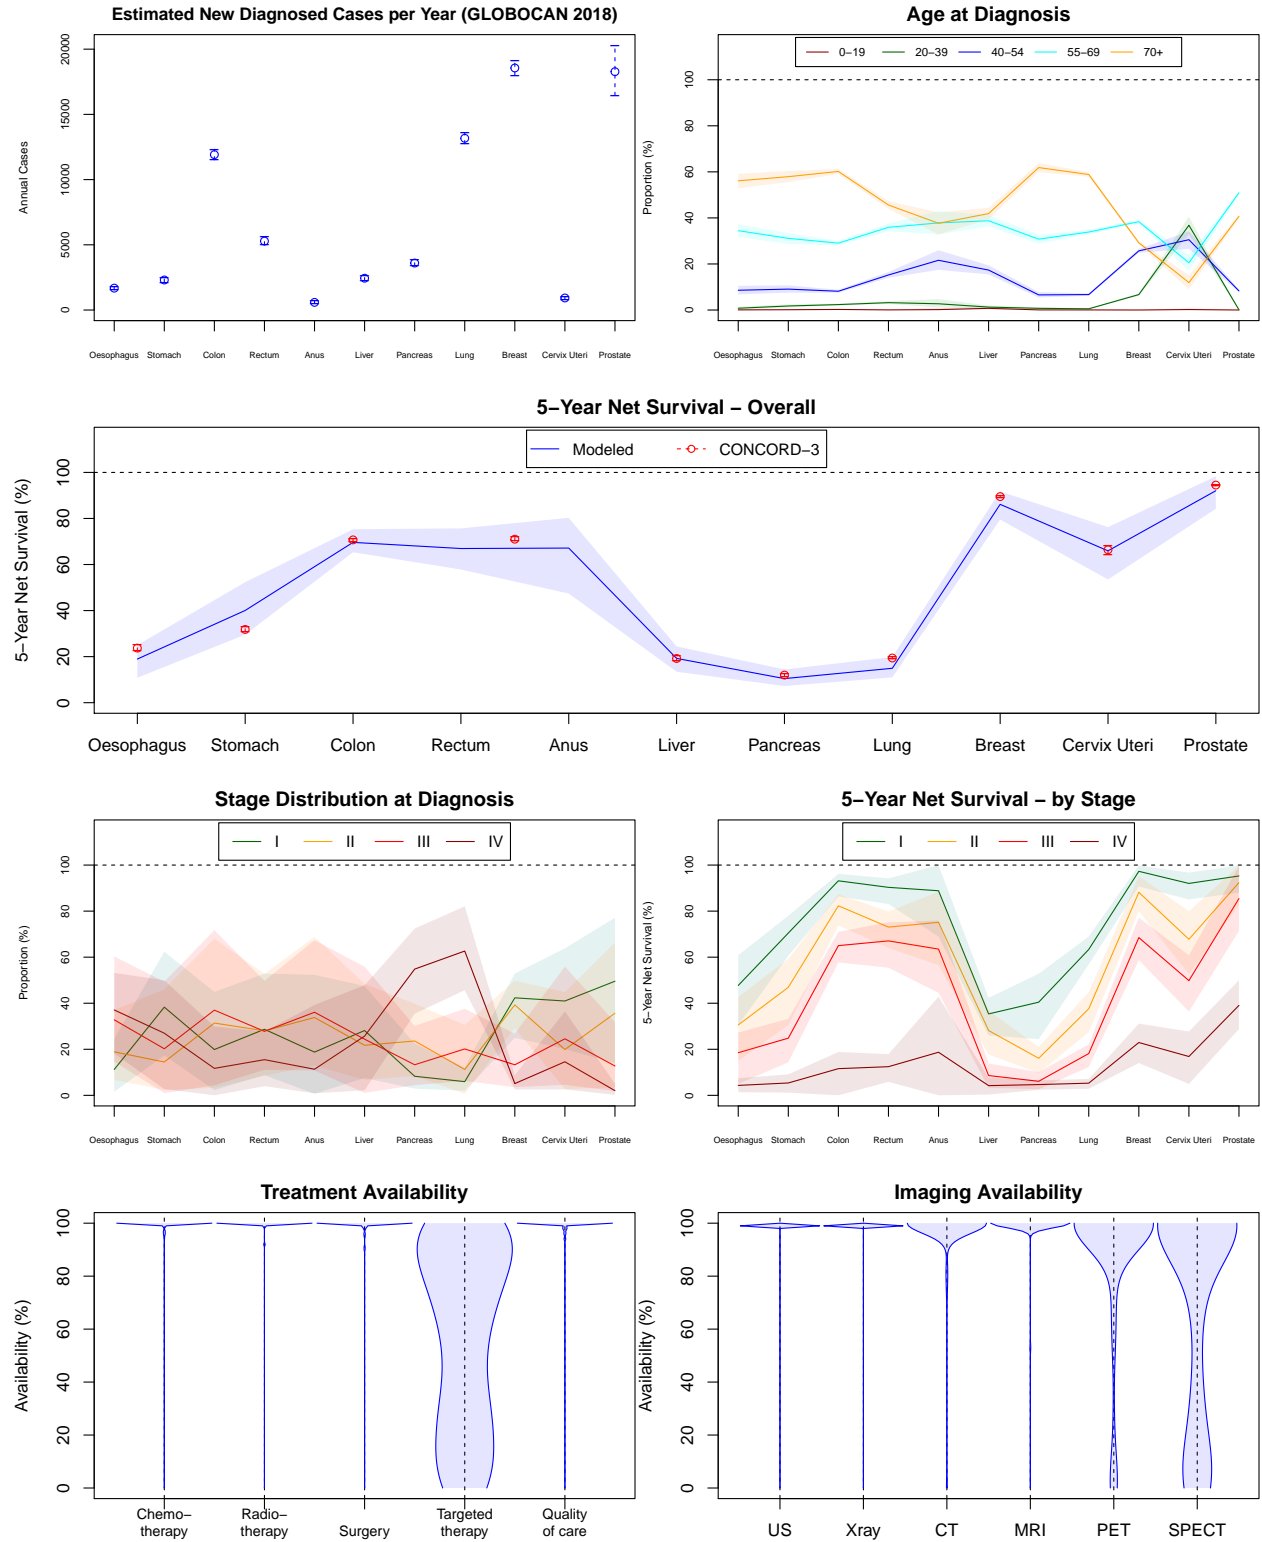

# Austria

| ISO Code | Region         | Area   | Income Group |
|----------|----------------|--------|--------------|
| AUT      | Western Europe | Europe | High income  |

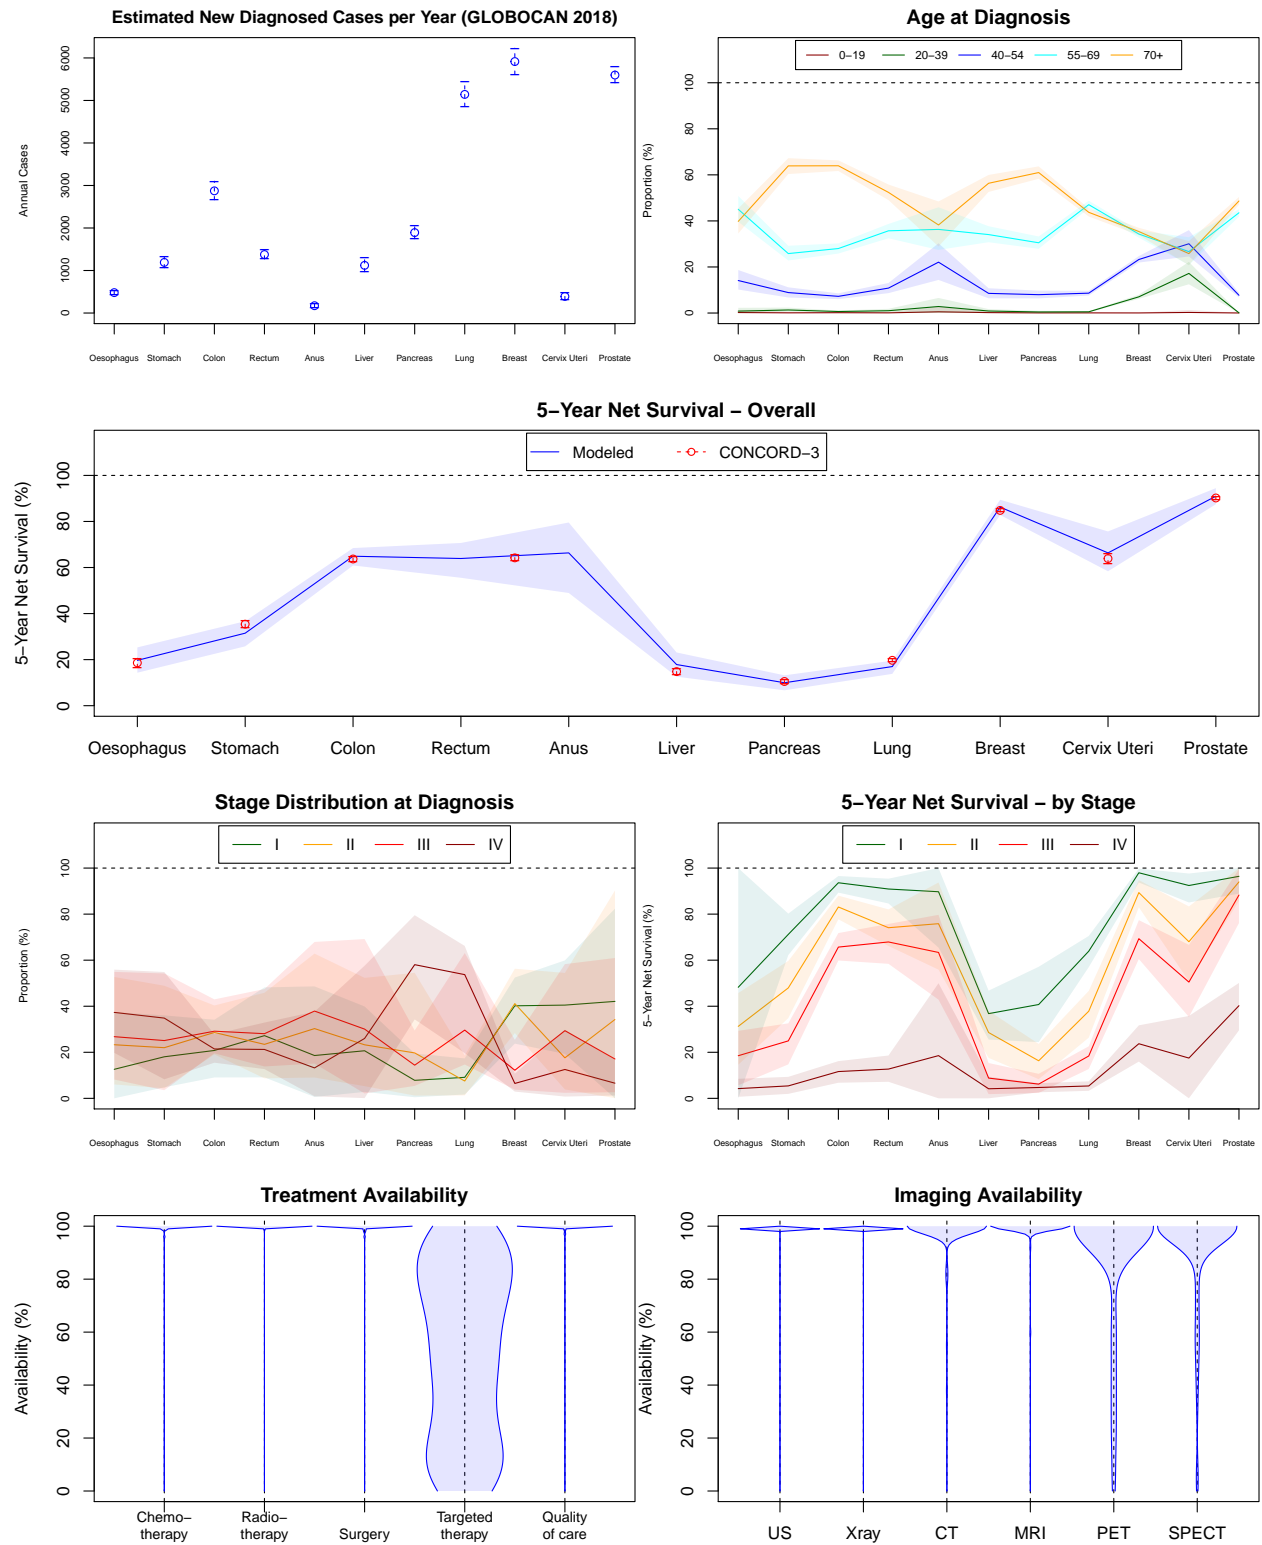



# Azerbaijan

| ISO Code | Region       | Area | Income Group        |
|----------|--------------|------|---------------------|
| AZE      | Western Asia | Asia | Upper middle income |

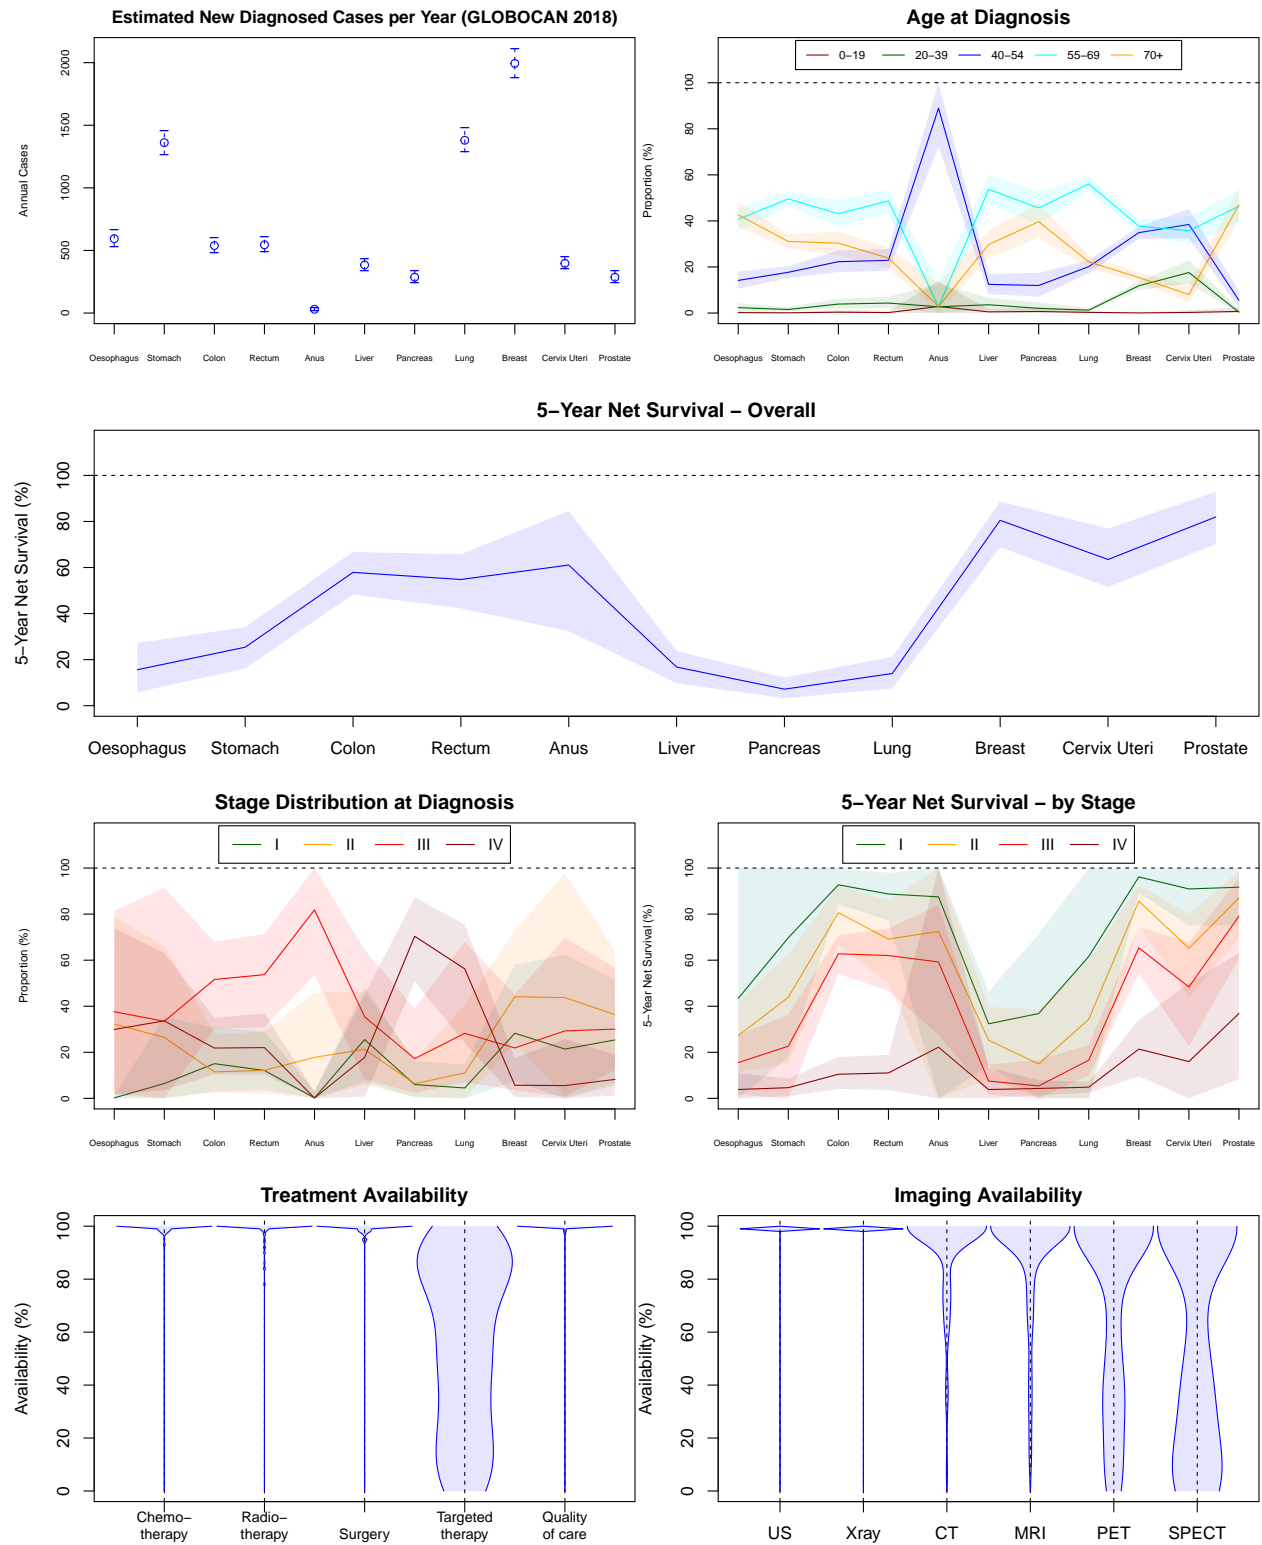

# Bahamas

| ISO Code | Region    | Area                            | Income Group |
|----------|-----------|---------------------------------|--------------|
| BHS      | Caribbean | Latin America and the Caribbean | High income  |

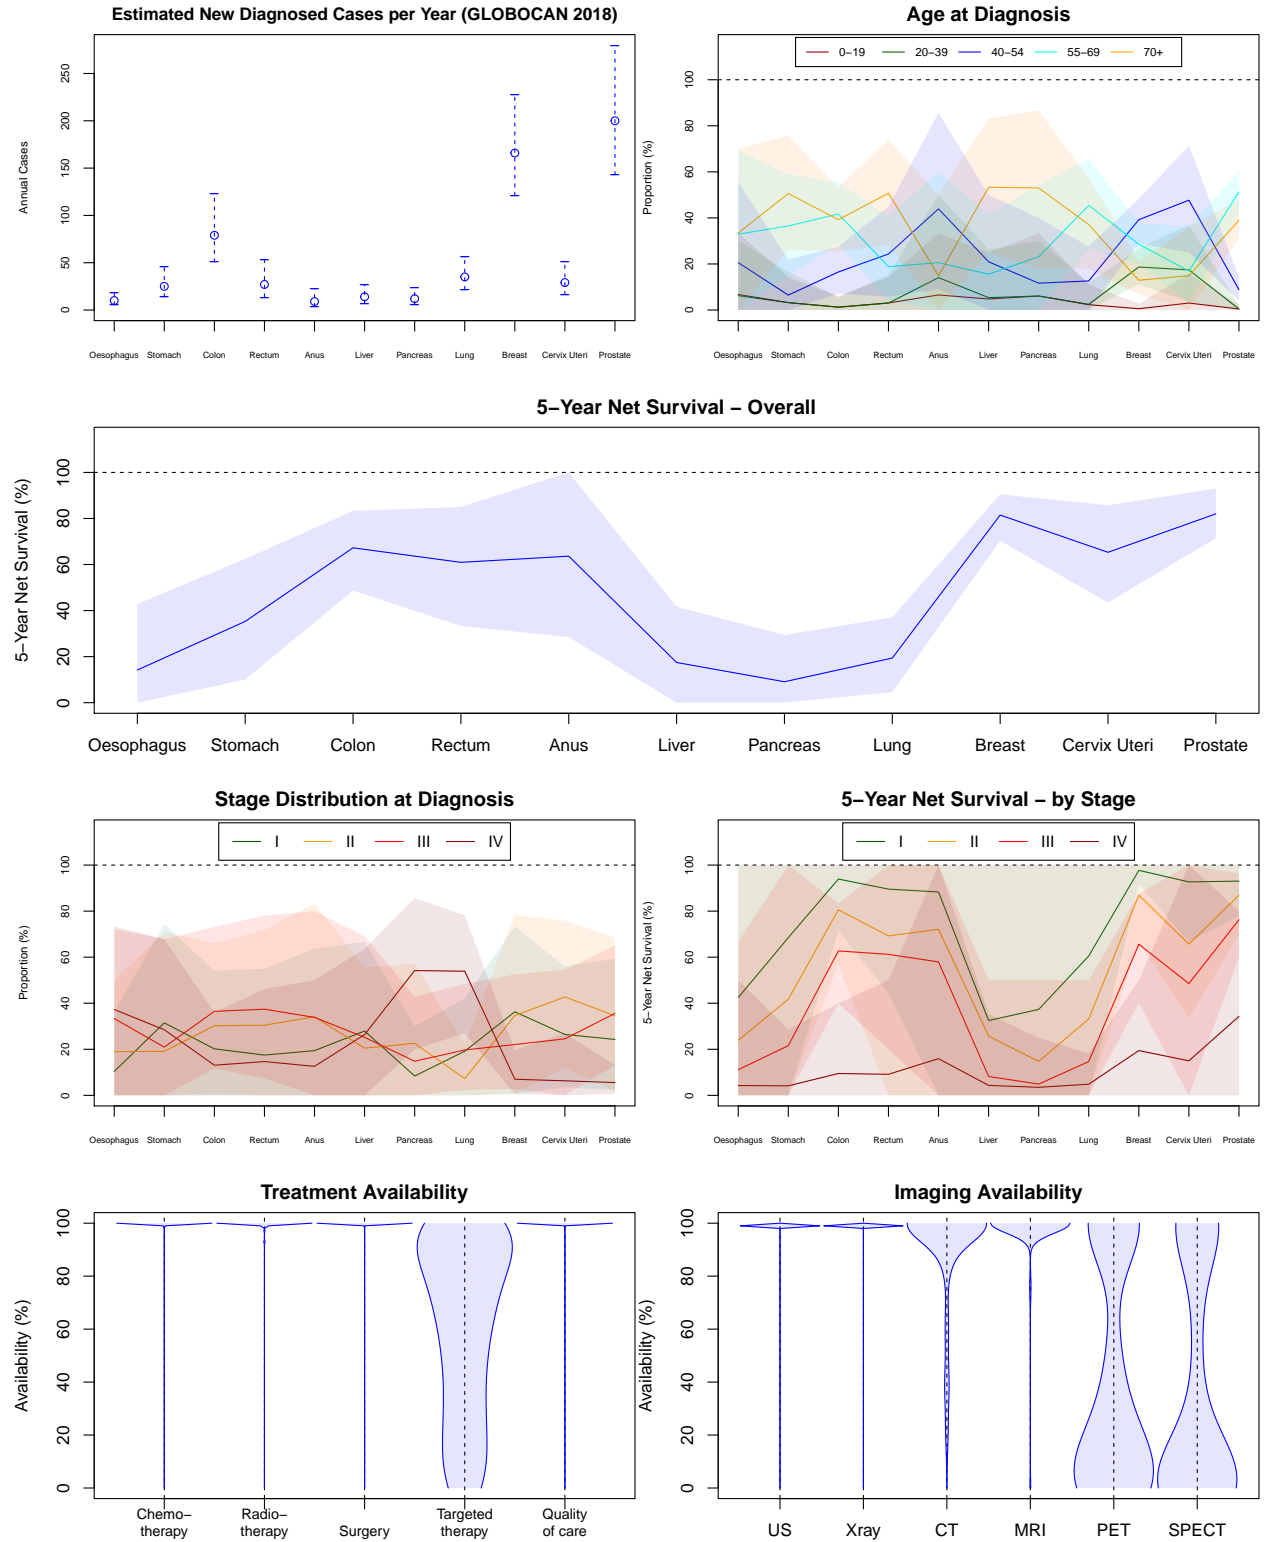

# Bahrain

| ISO Code | Region       | Area | Income Group |
|----------|--------------|------|--------------|
| BHR      | Western Asia | Asia | High income  |

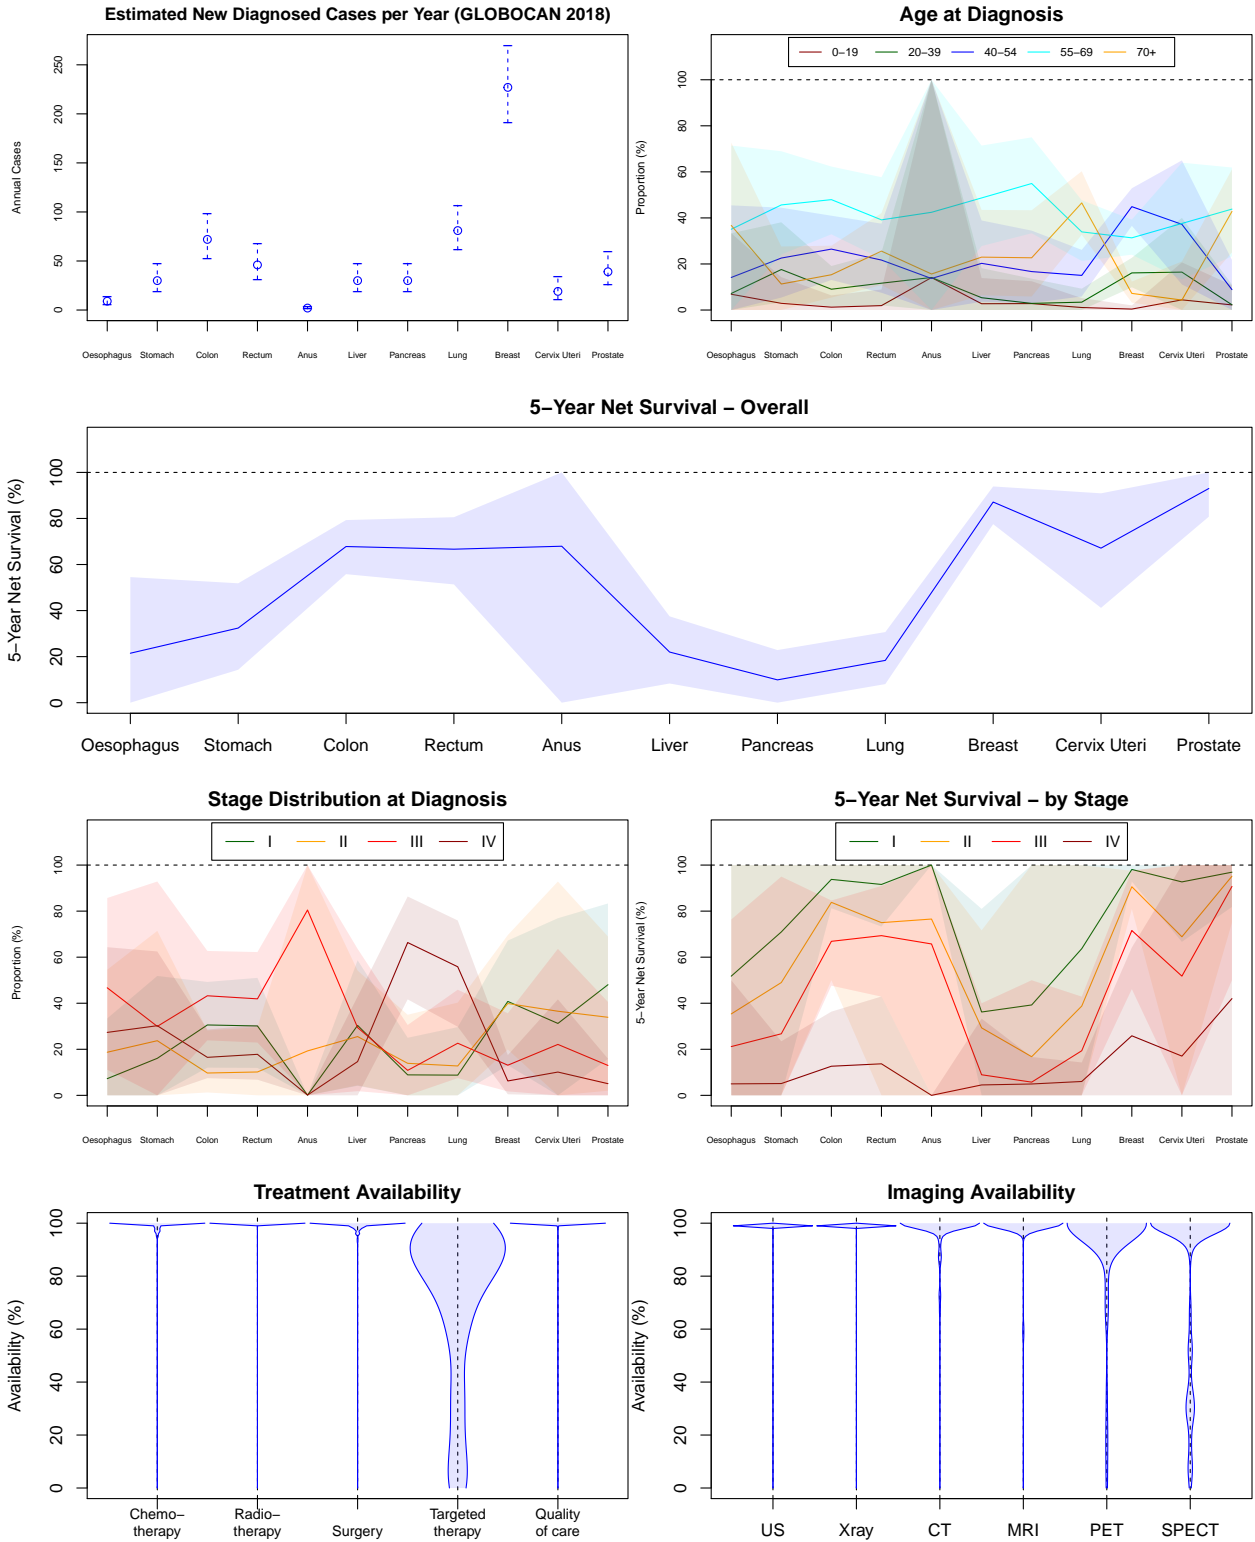

# Bangladesh

| ISO Code | Region        | Area | Income Group        |
|----------|---------------|------|---------------------|
| BGD      | Southern Asia | Asia | Lower middle income |

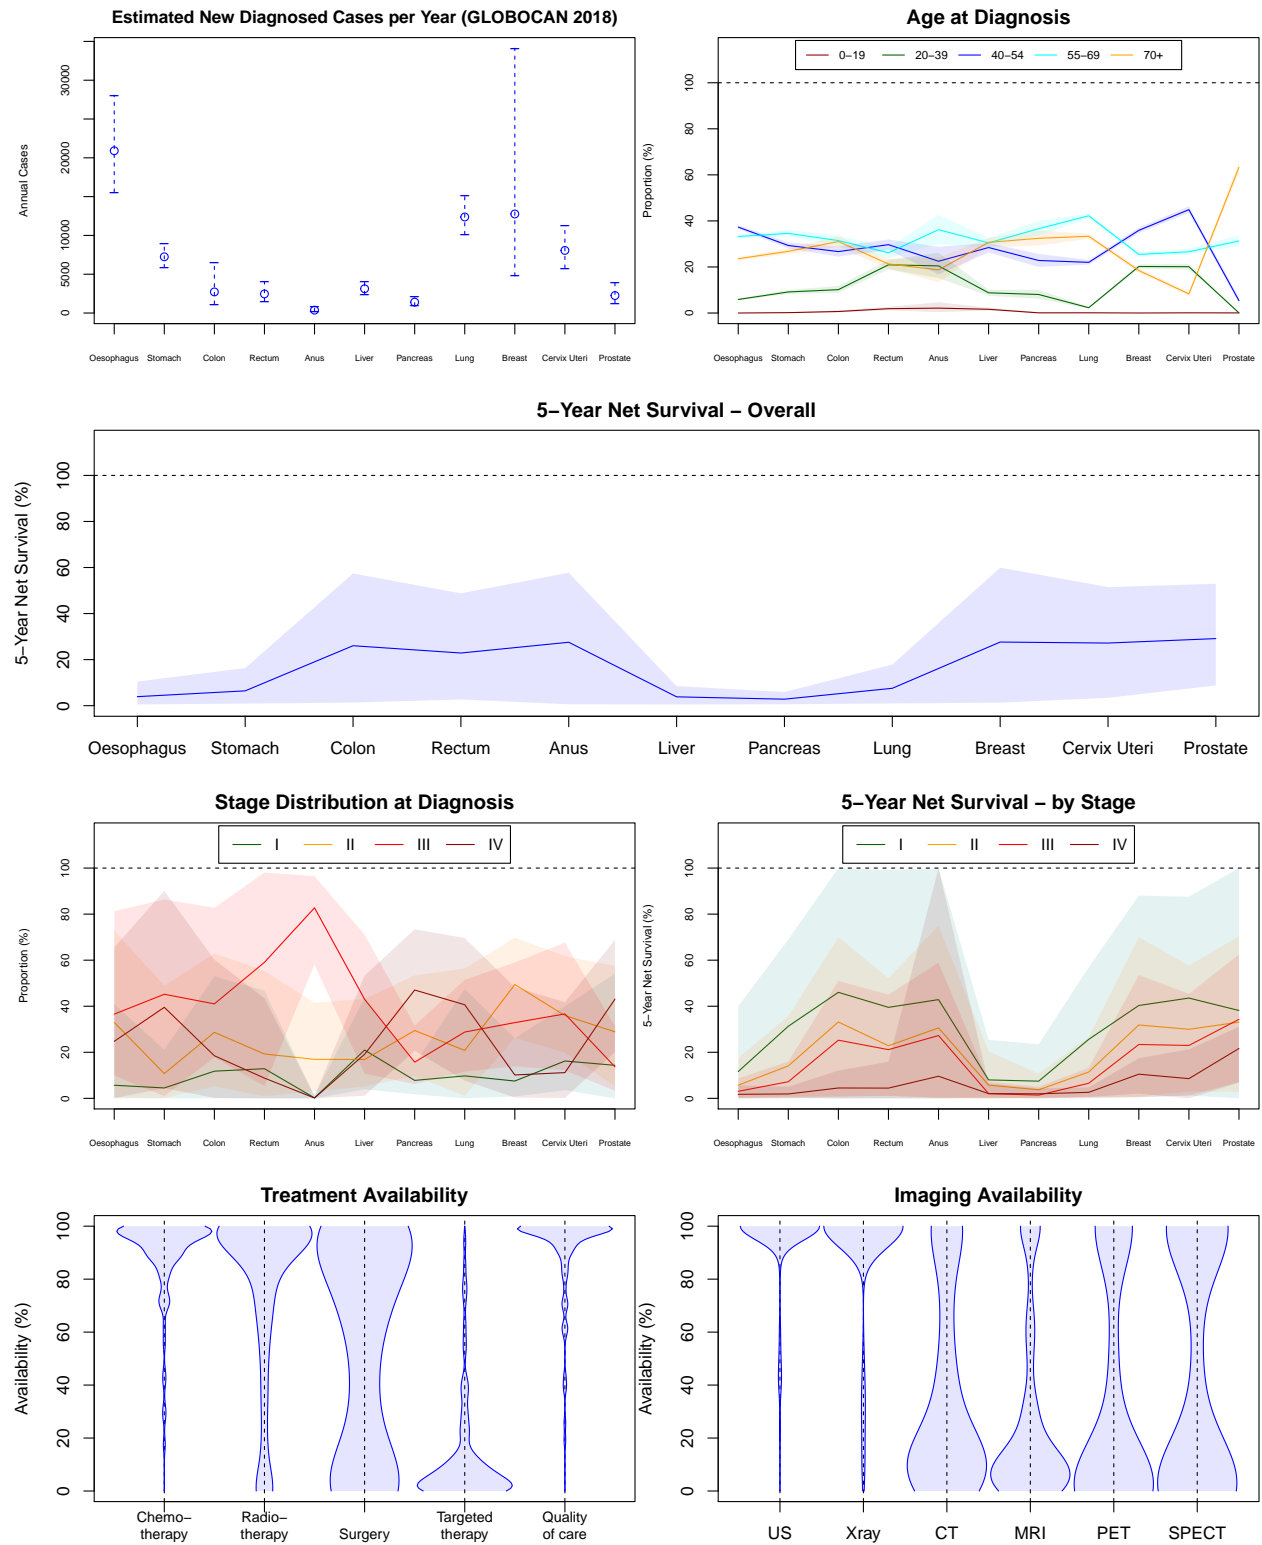

# Barbados

| ISO Code | Region    | Area                            | Income Group |
|----------|-----------|---------------------------------|--------------|
| BRB      | Caribbean | Latin America and the Caribbean | High income  |

**Estimated New Diagnosed Cases per Year (GLOBOCAN 2018)**

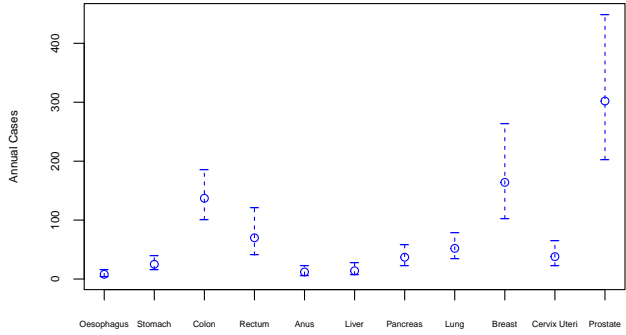

**Age at Diagnosis**

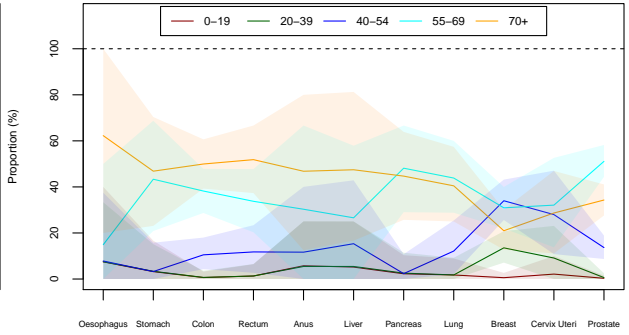

**5-Year Net Survival – Overall**

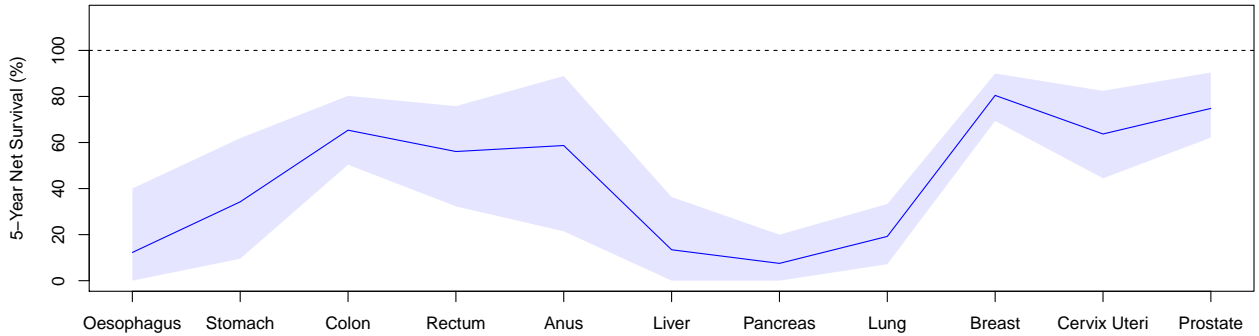

**Stage Distribution at Diagnosis**

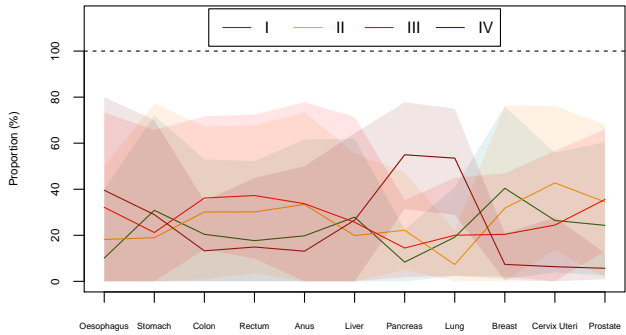

**5-Year Net Survival – by Stage**

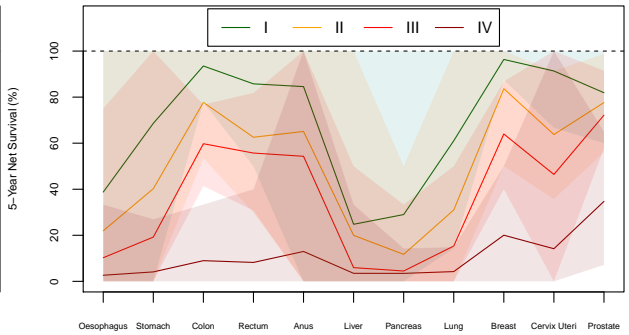

**Treatment Availability**

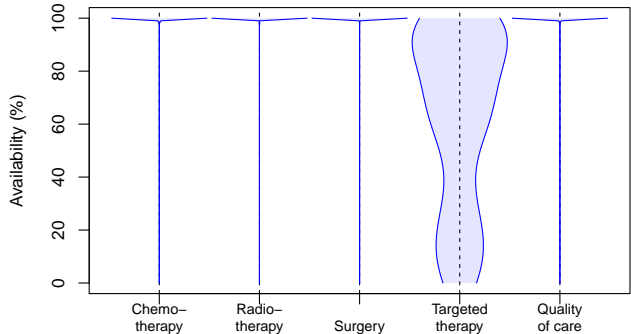

**Imaging Availability**

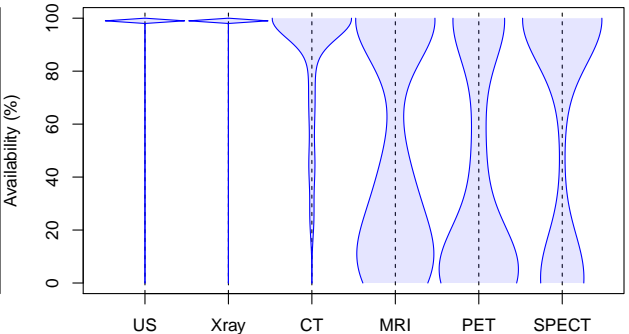

# Belarus

| ISO Code | Region         | Area   | Income Group        |
|----------|----------------|--------|---------------------|
| BLR      | Eastern Europe | Europe | Upper middle income |

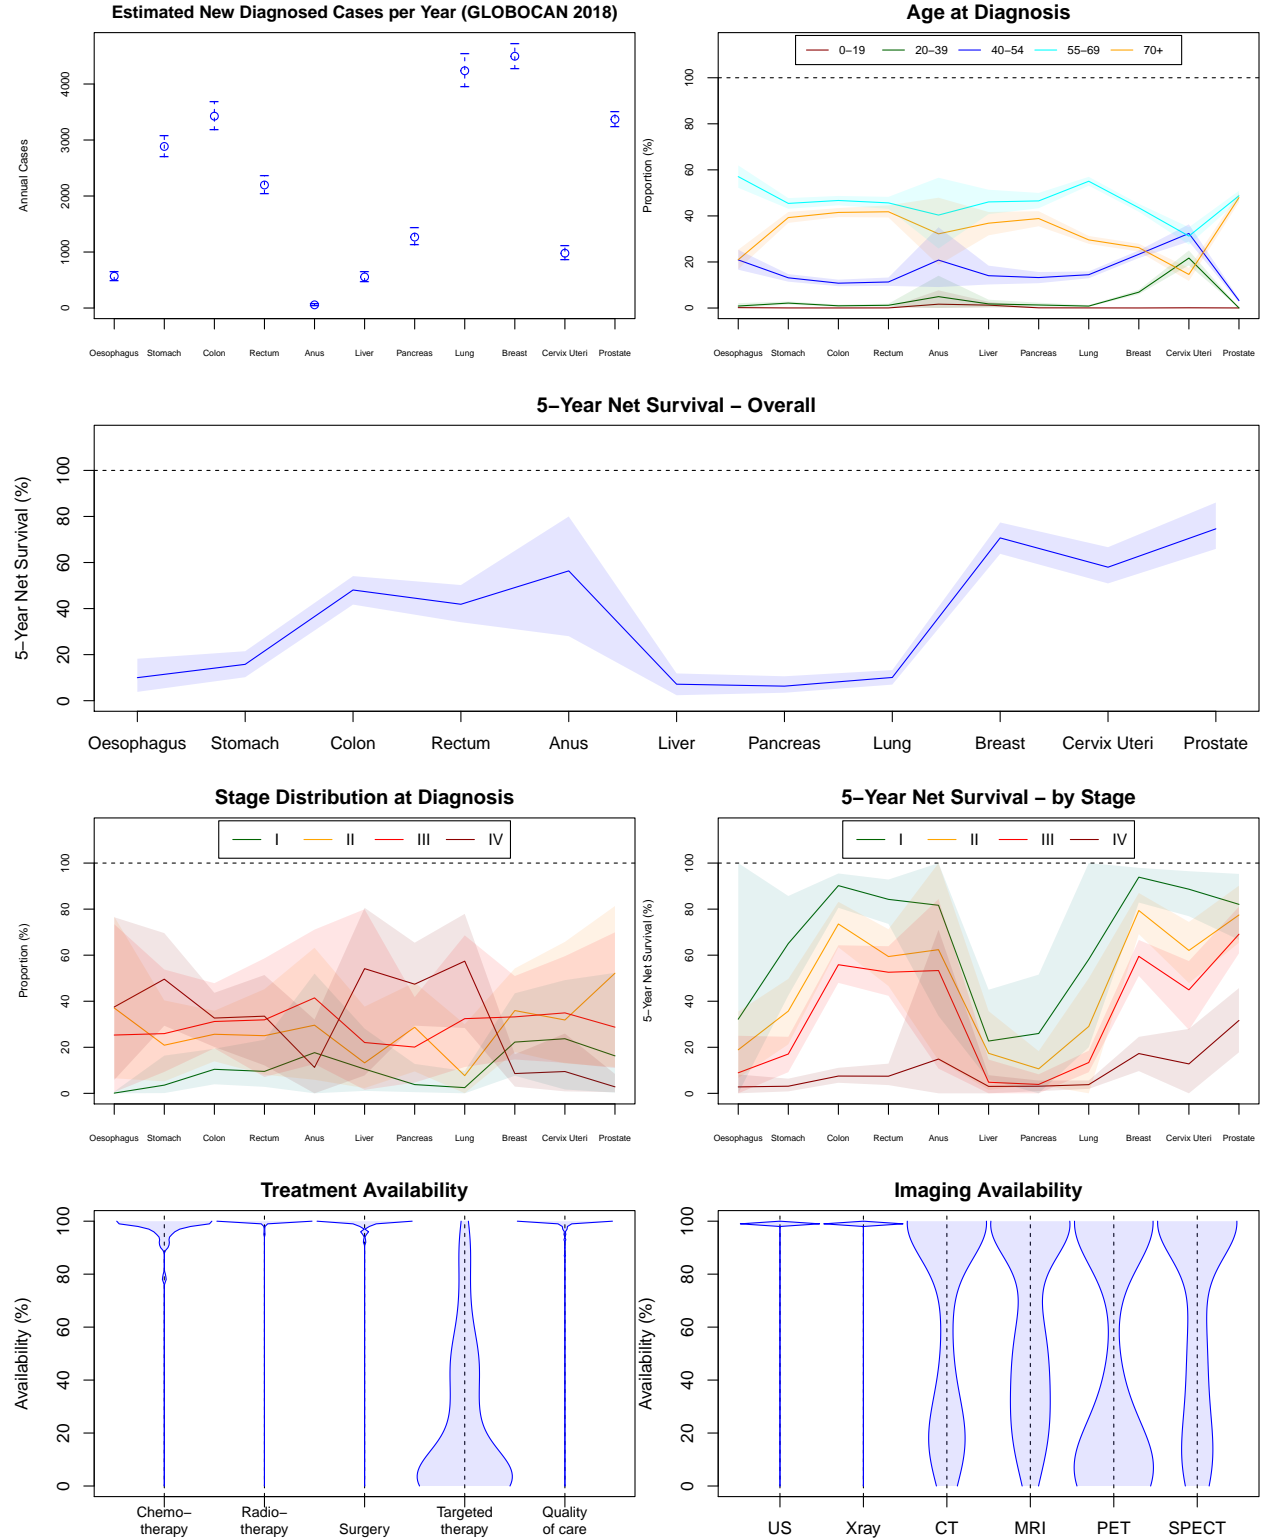

# Belgium

| ISO Code | Region         | Area   | Income Group |
|----------|----------------|--------|--------------|
| BEL      | Western Europe | Europe | High income  |

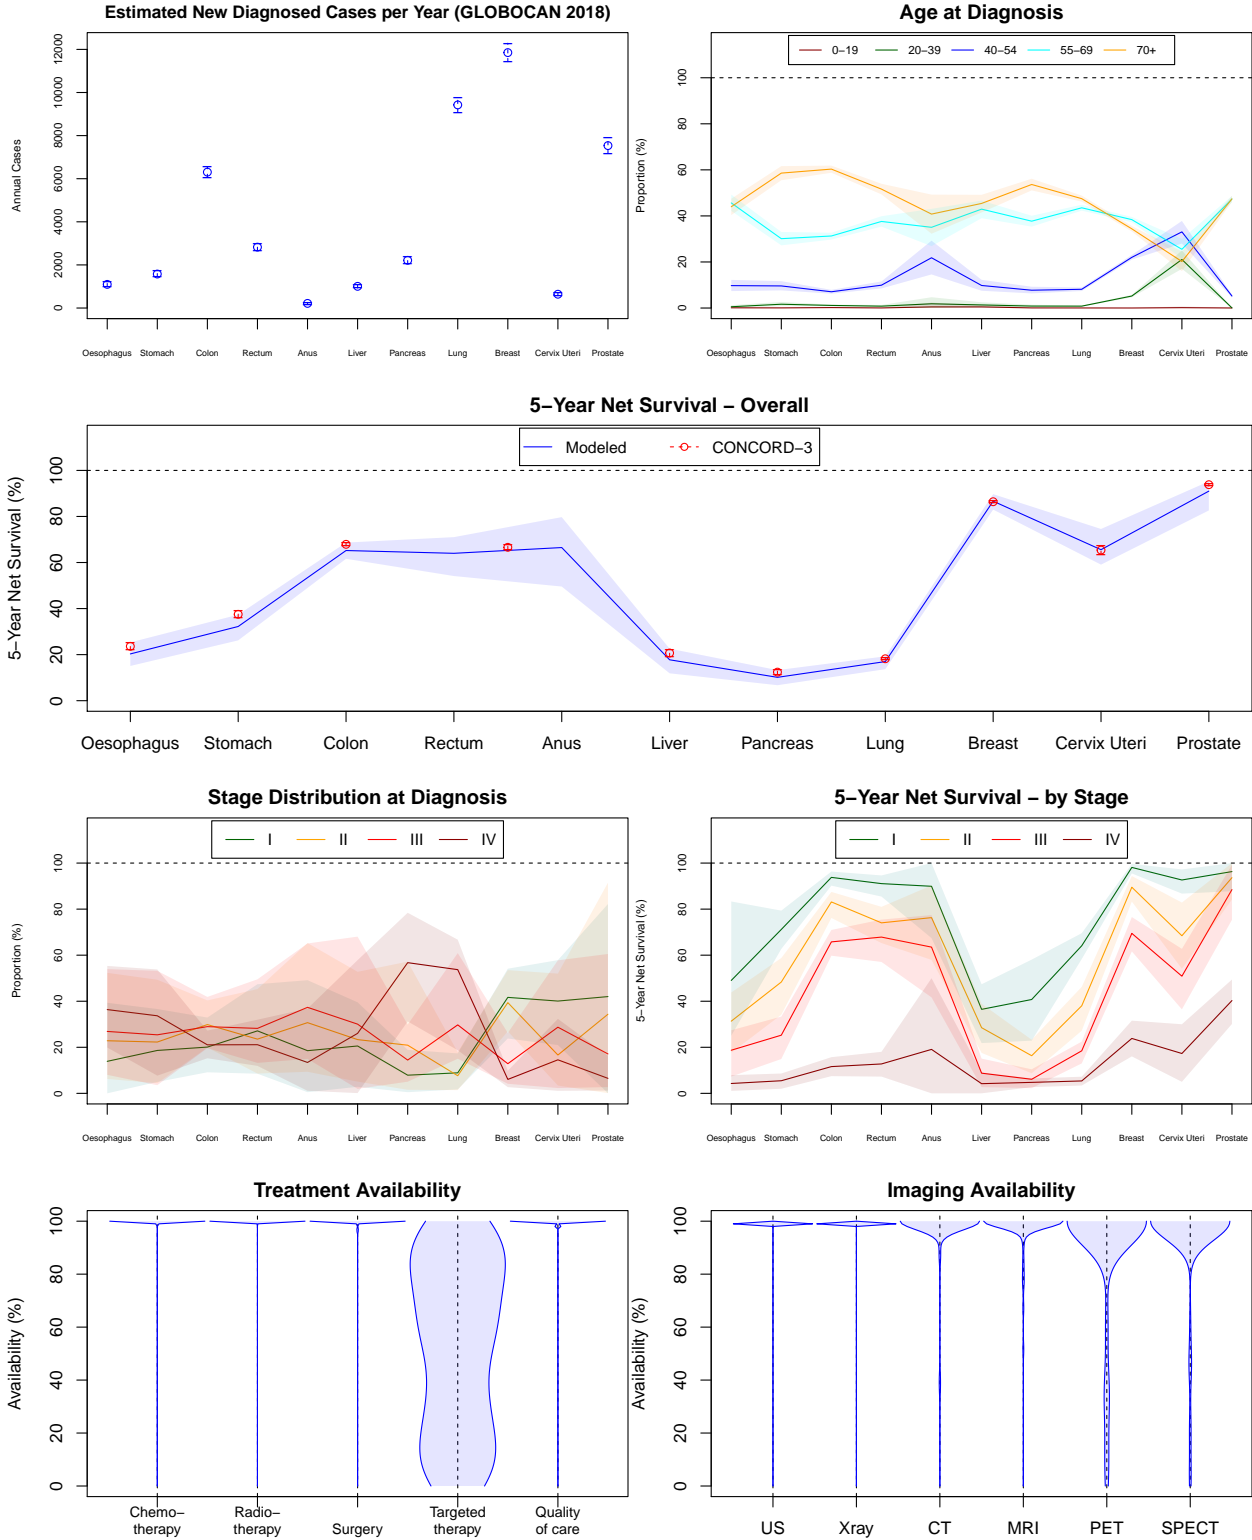

# Belize

| ISO Code | Region          | Area                            | Income Group        |
|----------|-----------------|---------------------------------|---------------------|
| BLZ      | Central America | Latin America and the Caribbean | Upper middle income |

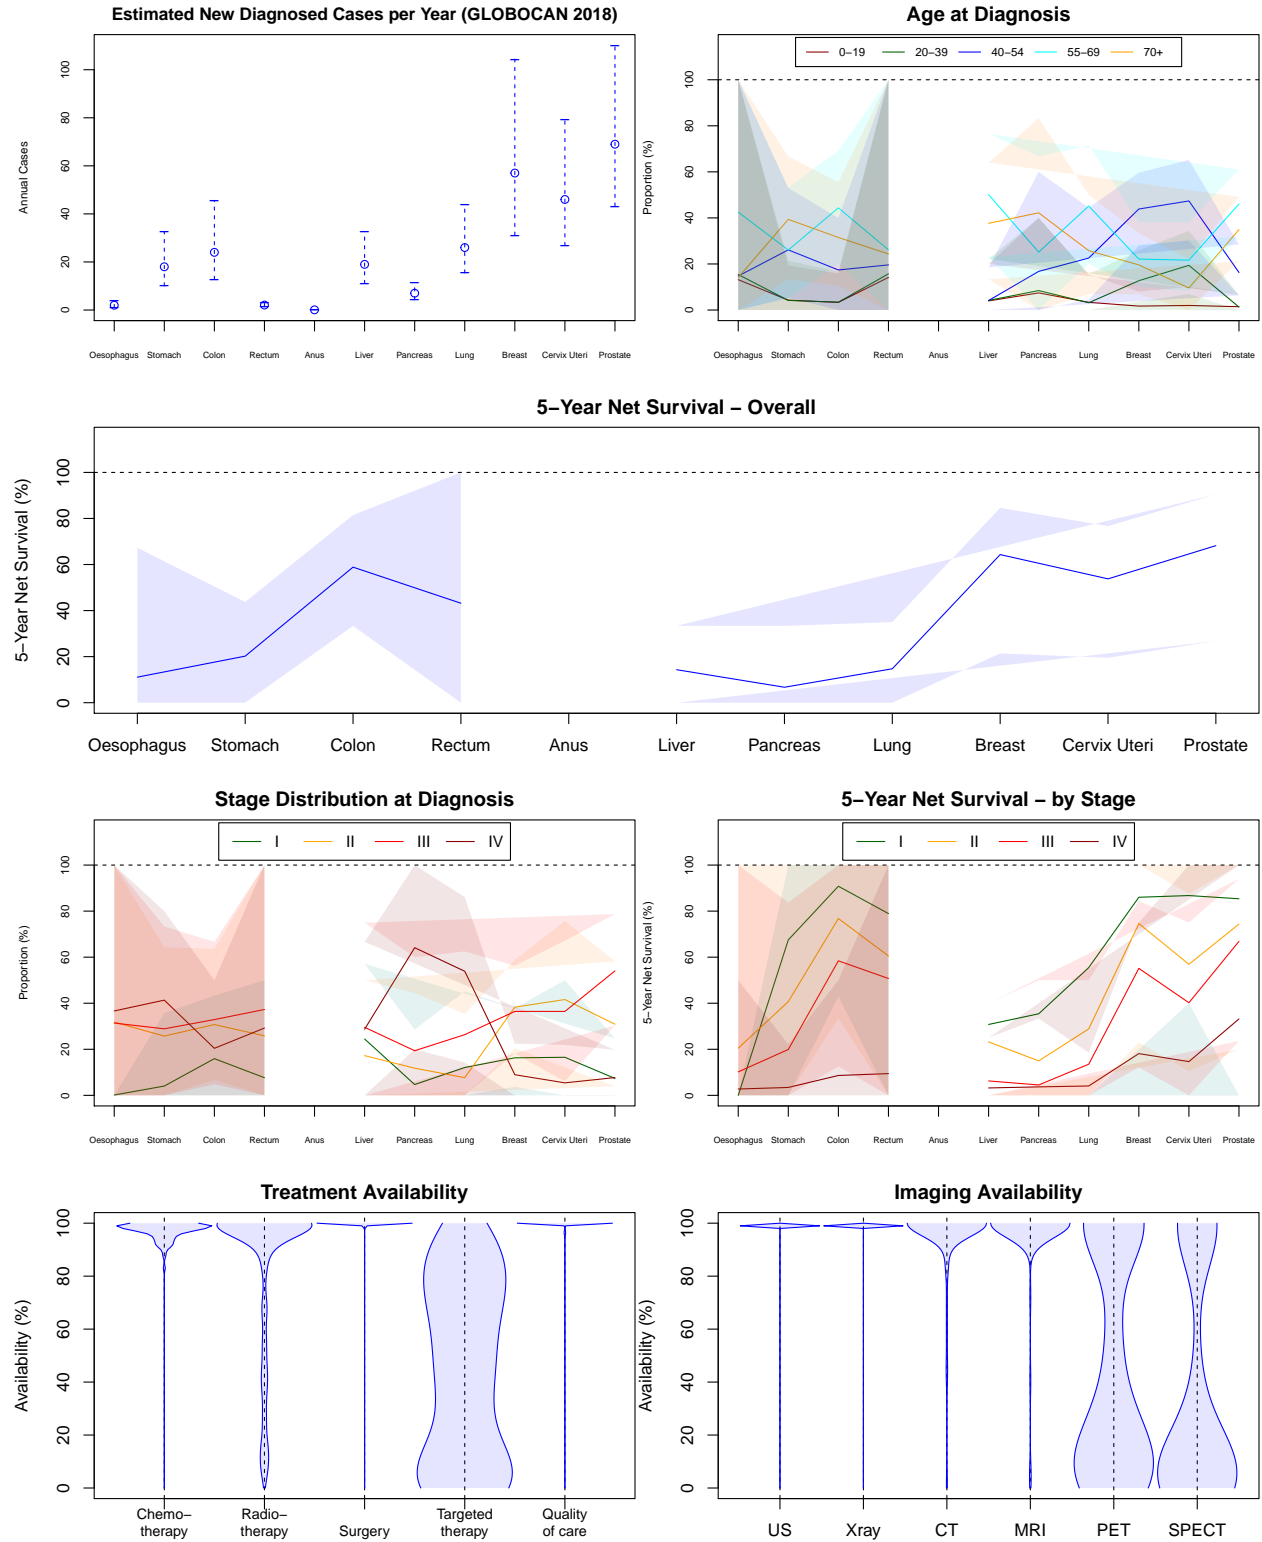



# Benin

| ISO Code | Region         | Area   | Income Group |
|----------|----------------|--------|--------------|
| BEN      | Western Africa | Africa | Low income   |

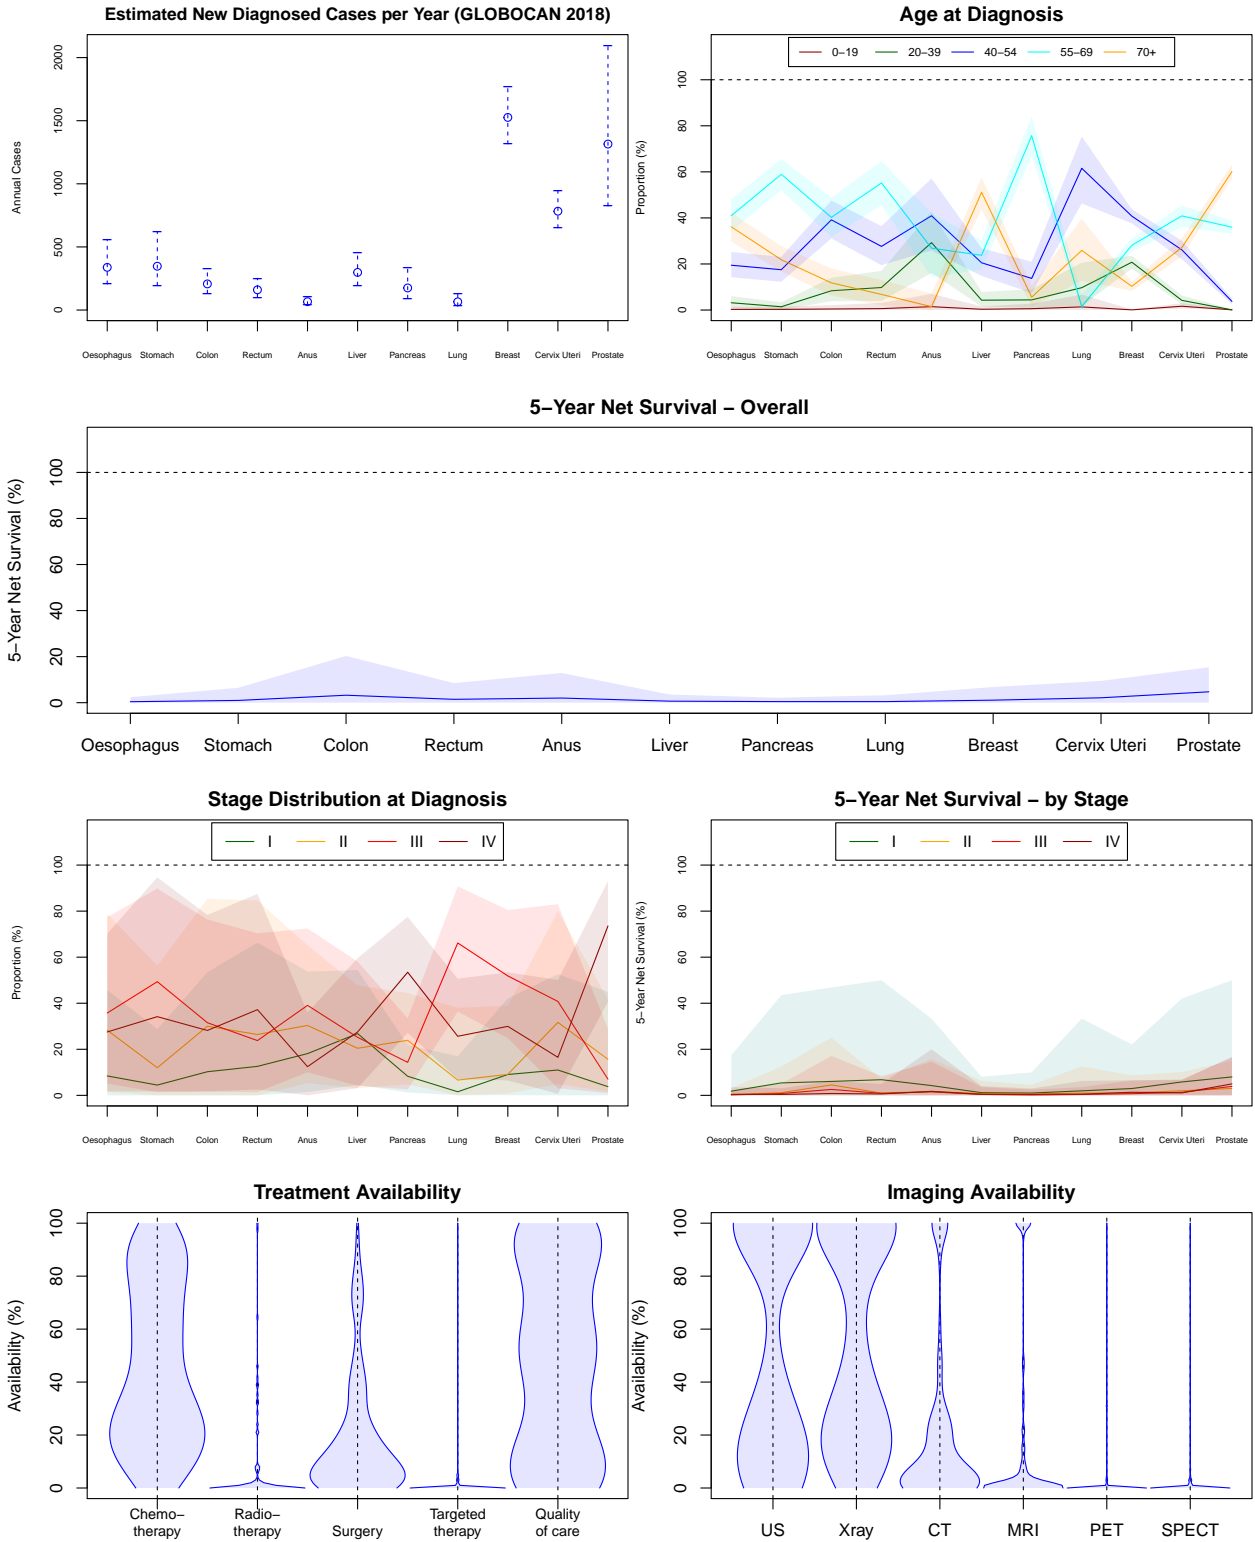

# Bermuda

| ISO Code | Region           | Area             | Income Group |
|----------|------------------|------------------|--------------|
| BMU      | Northern America | Northern America | High income  |

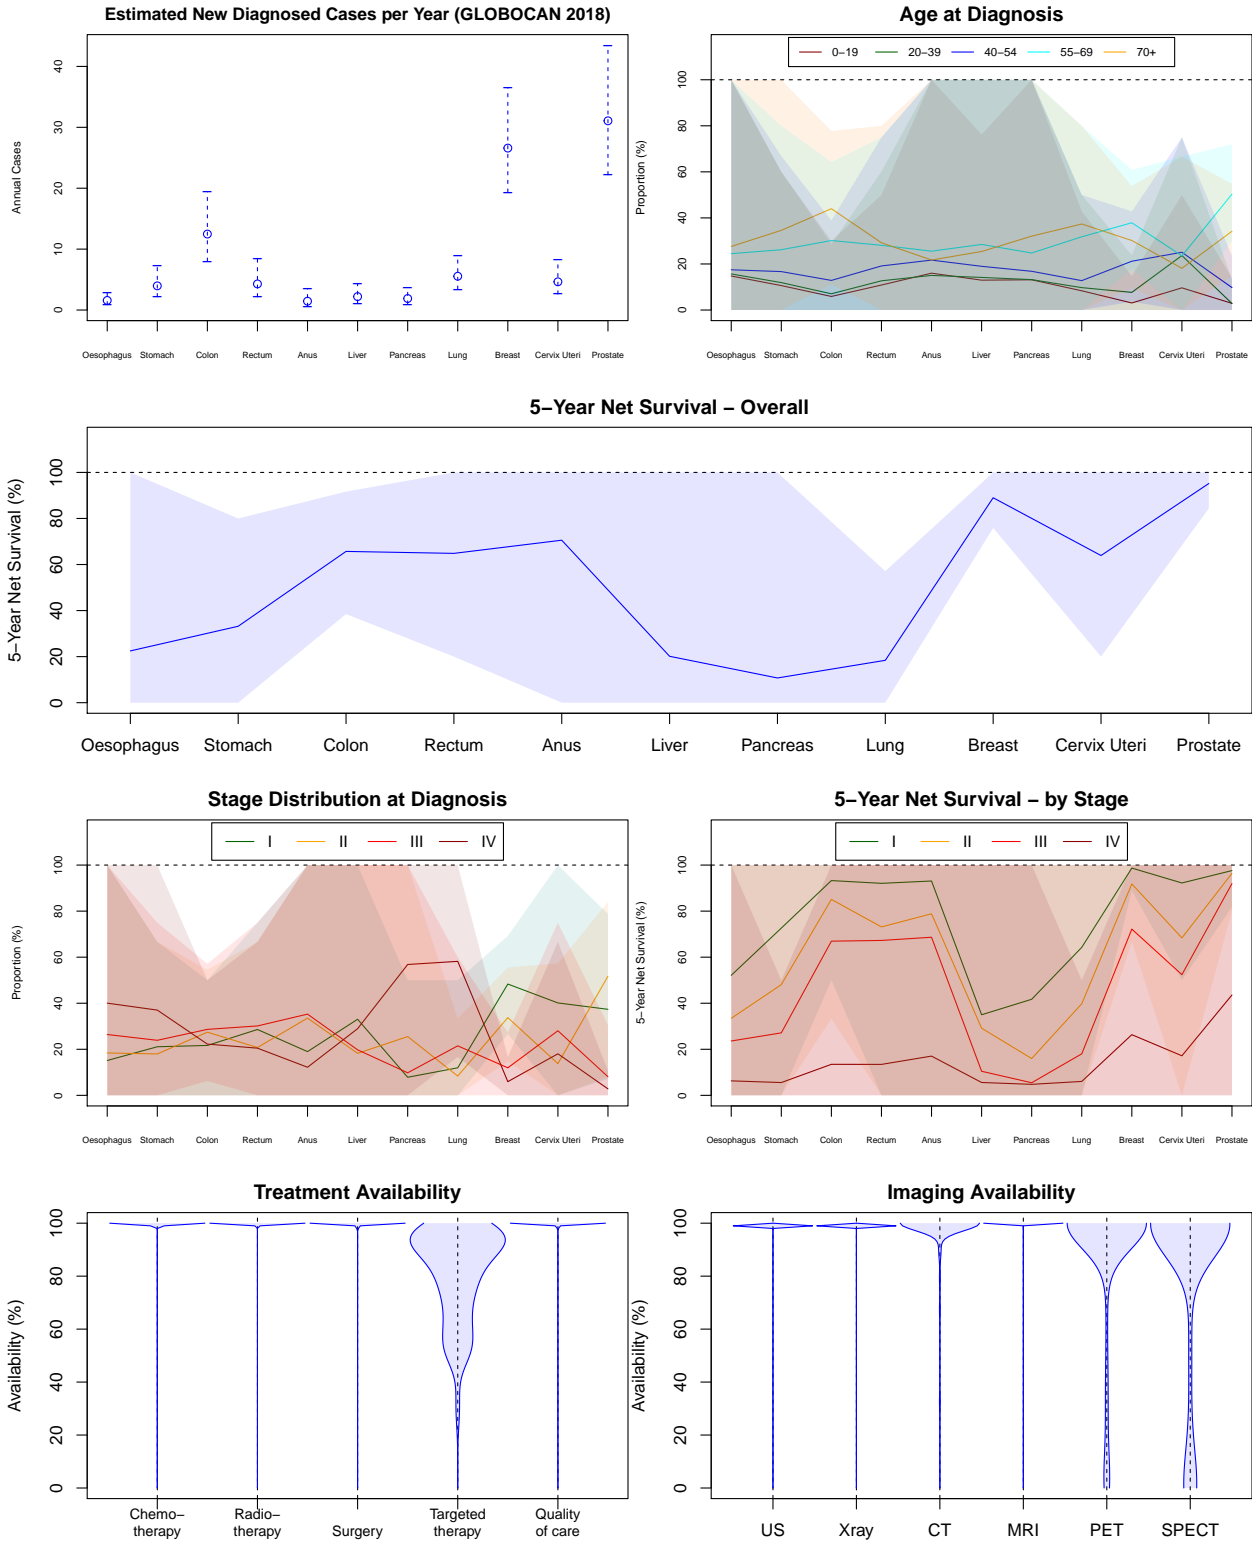

# Bhutan

| ISO Code | Region        | Area | Income Group        |
|----------|---------------|------|---------------------|
| BTN      | Southern Asia | Asia | Lower middle income |

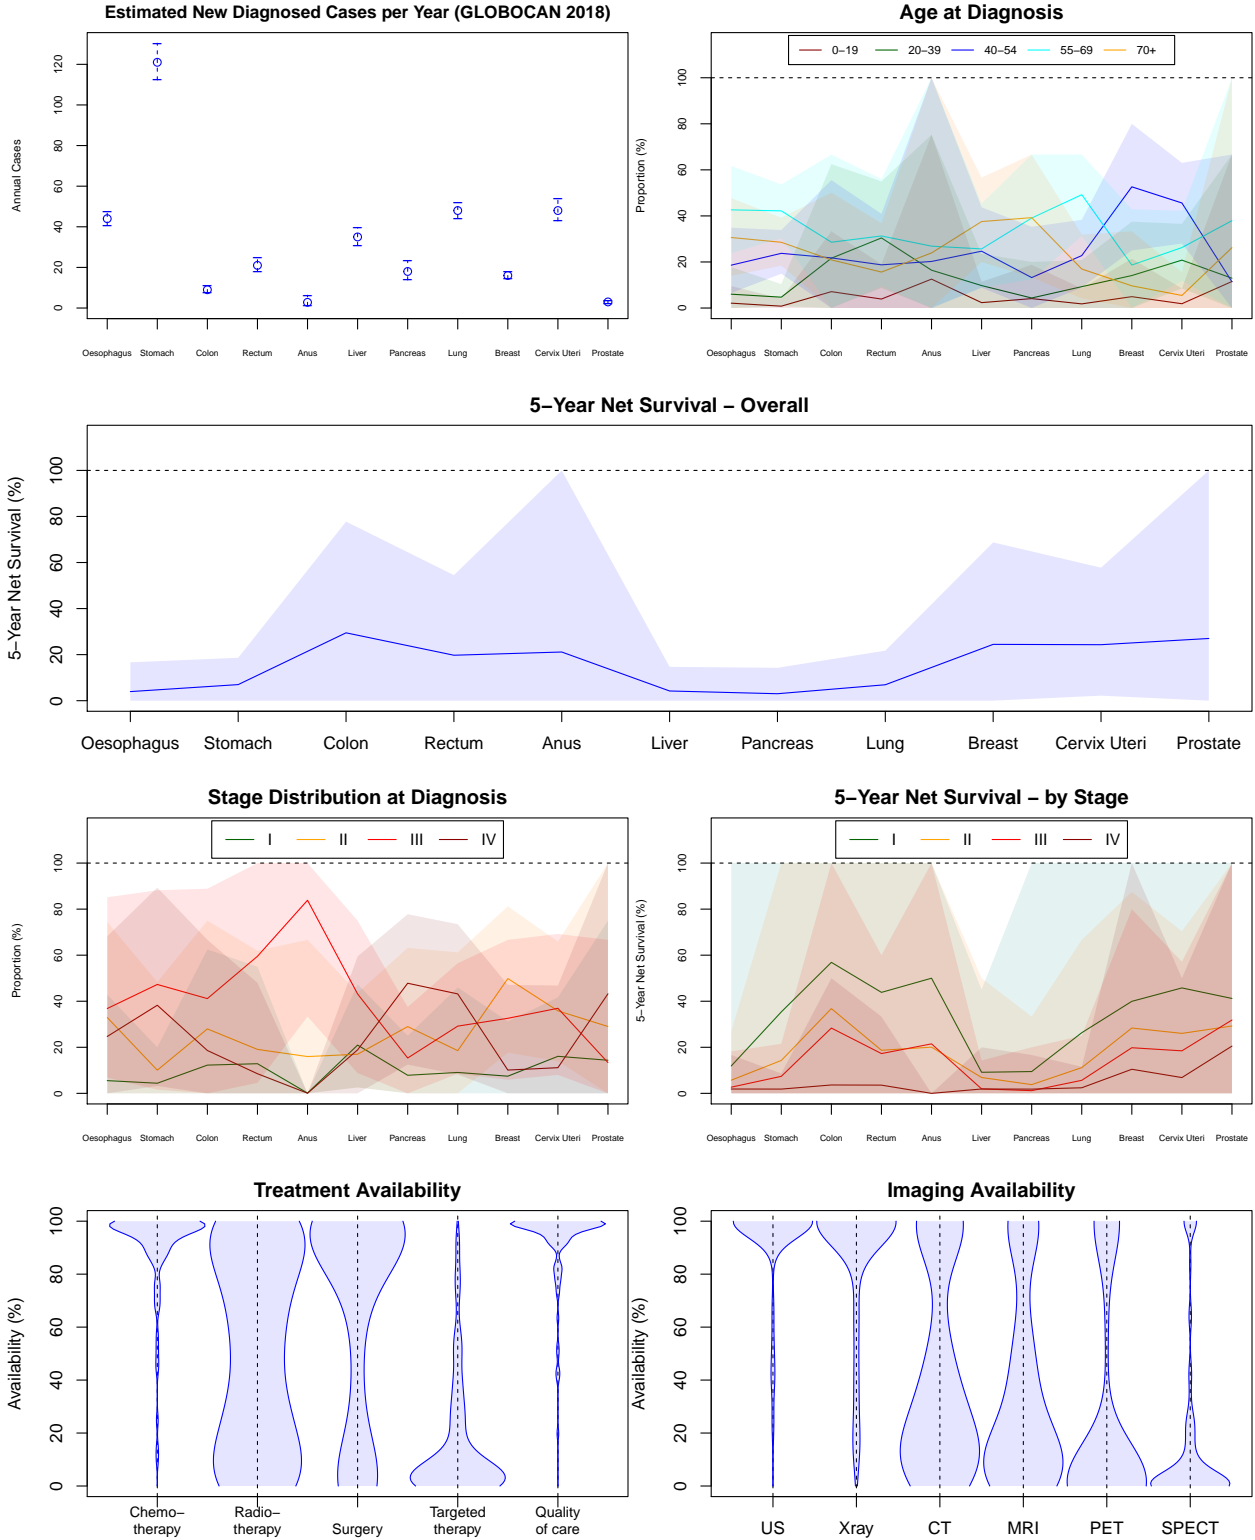

# Bolivia (Plurinational State of)

| ISO Code | Region        | Area                            | Income Group        |
|----------|---------------|---------------------------------|---------------------|
| BOL      | South America | Latin America and the Caribbean | Lower middle income |

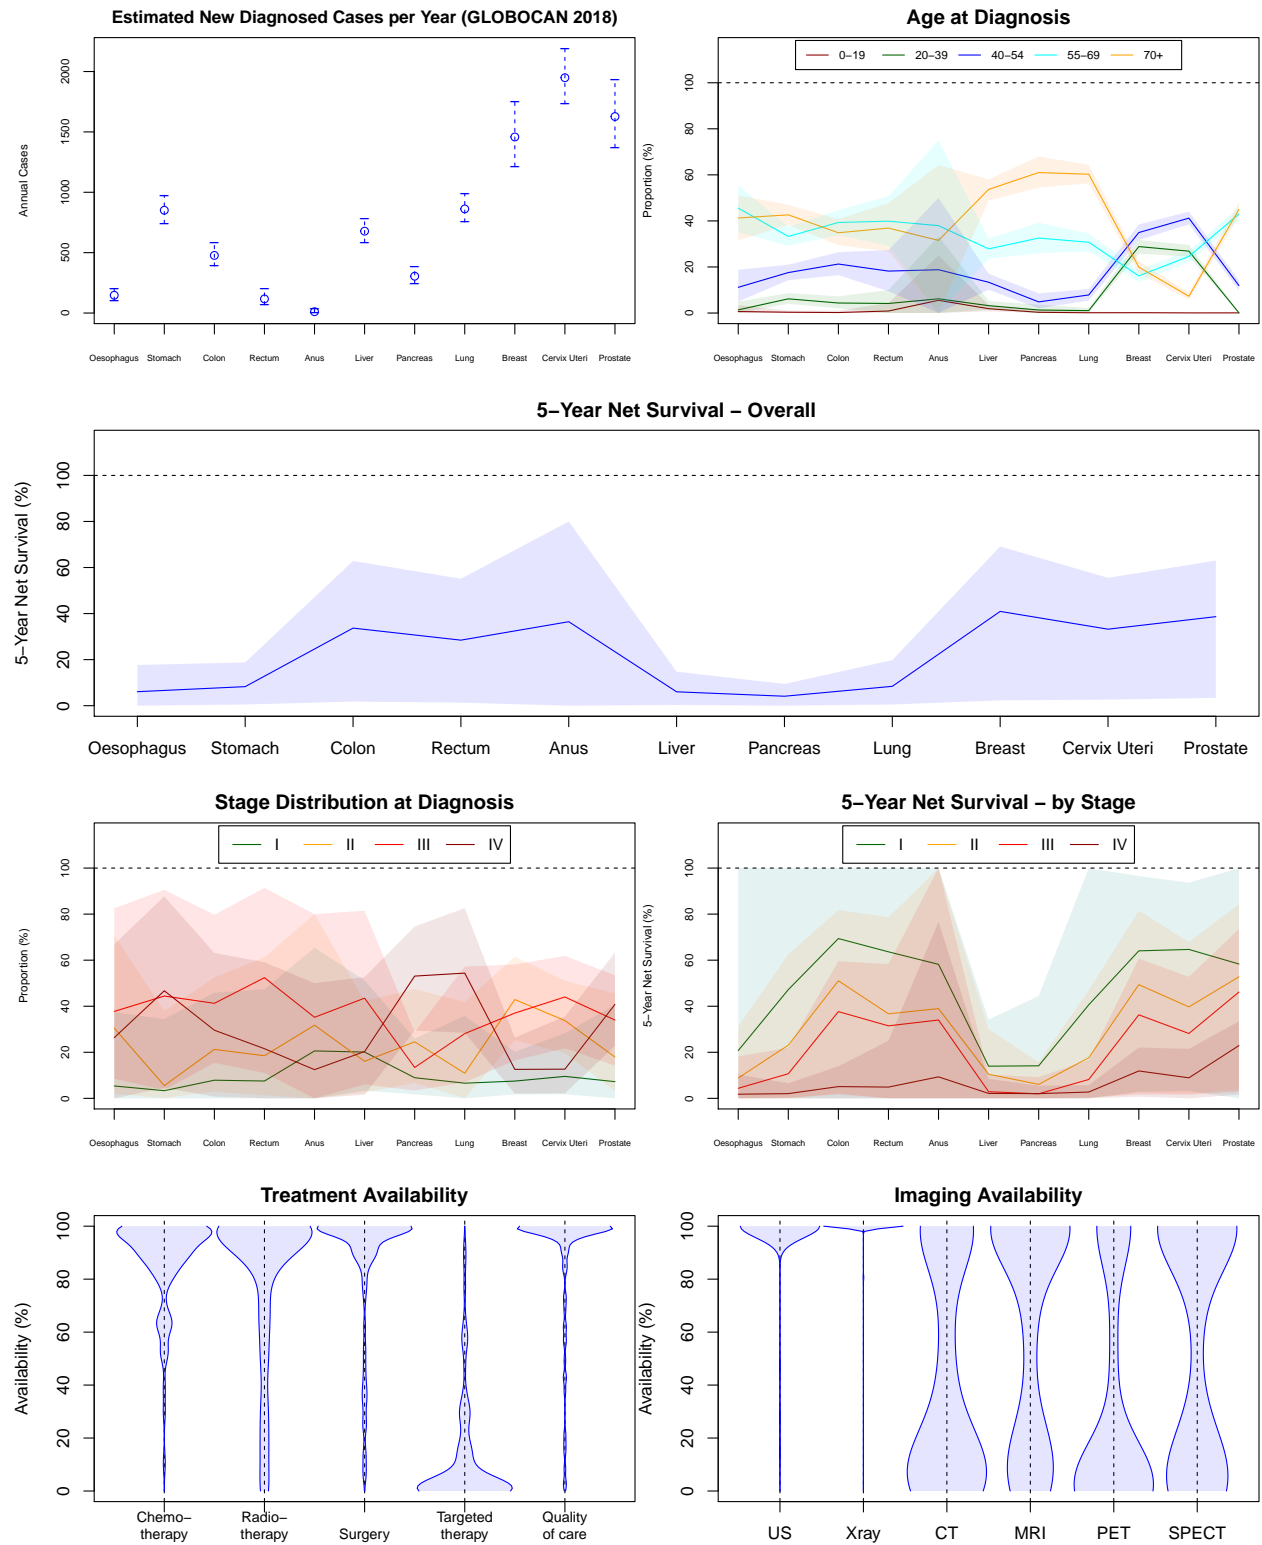

# Bosnia and Herzegovina

| ISO Code | Region          | Area   | Income Group        |
|----------|-----------------|--------|---------------------|
| BIH      | Southern Europe | Europe | Upper middle income |

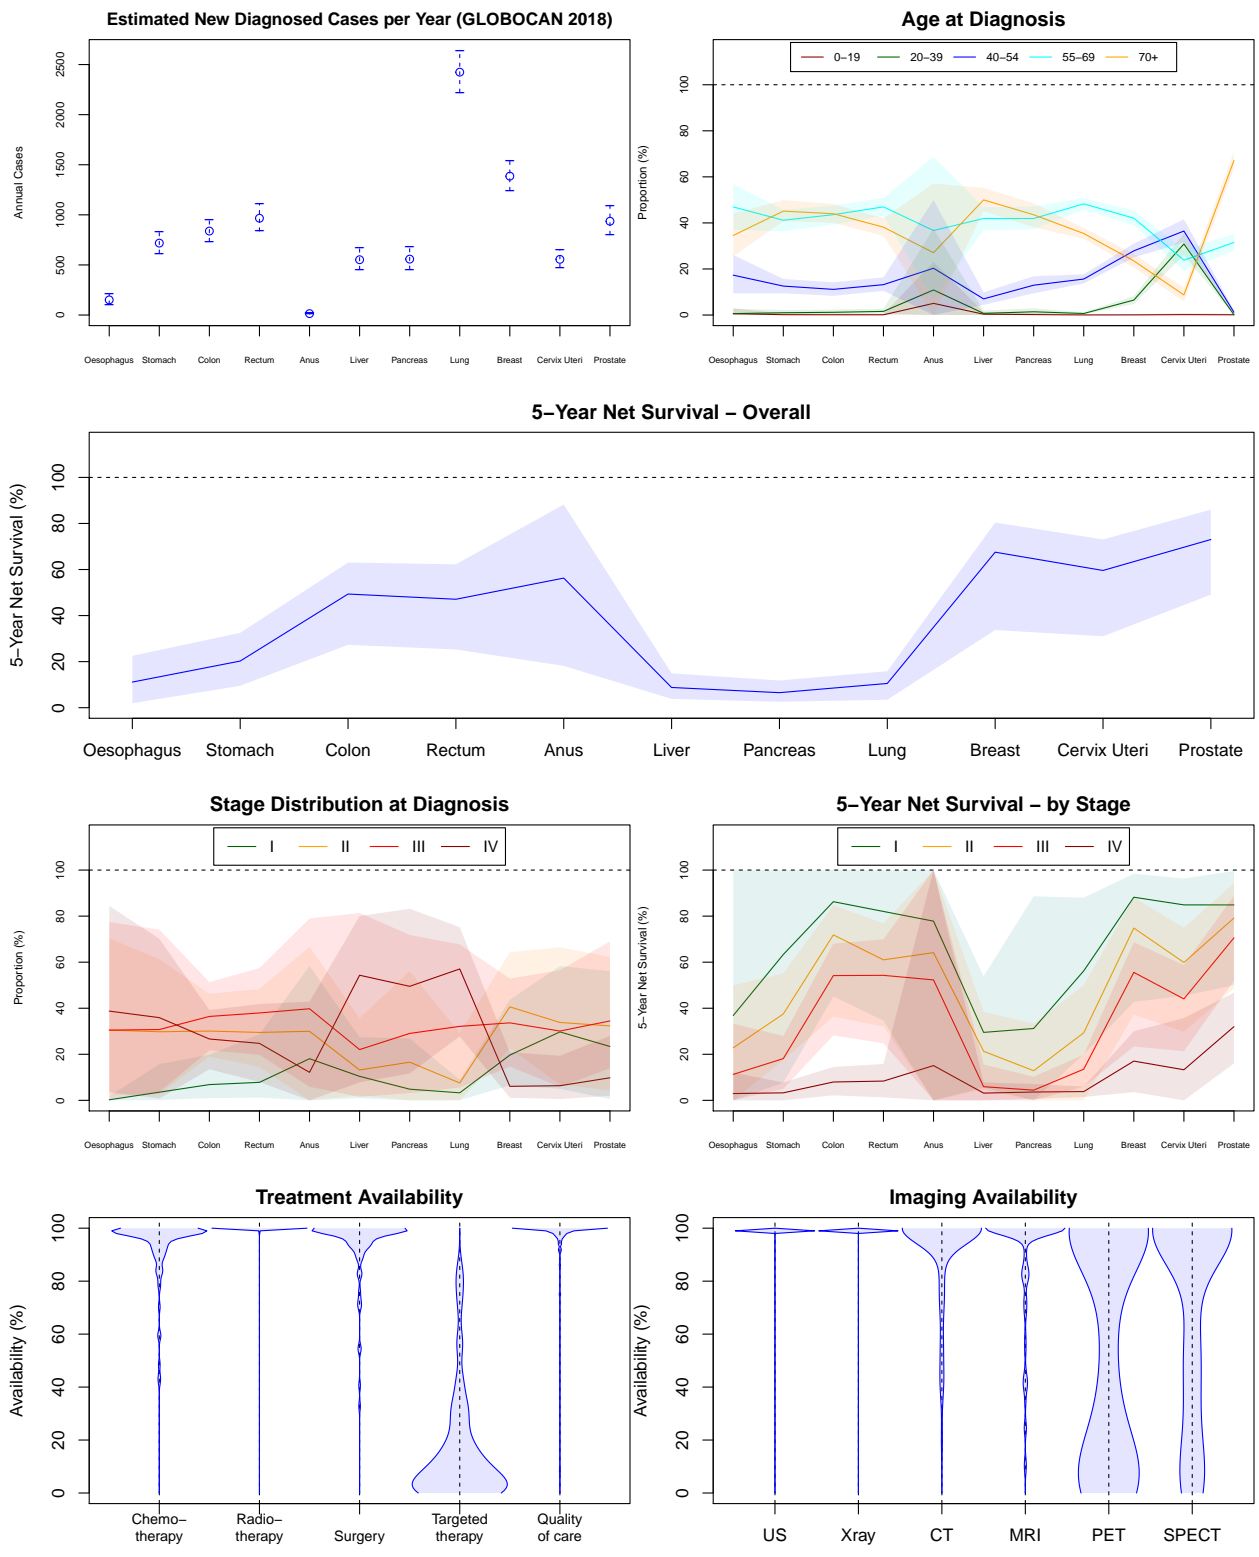

# Botswana

| ISO Code | Region          | Area   | Income Group        |
|----------|-----------------|--------|---------------------|
| BWA      | Southern Africa | Africa | Upper middle income |

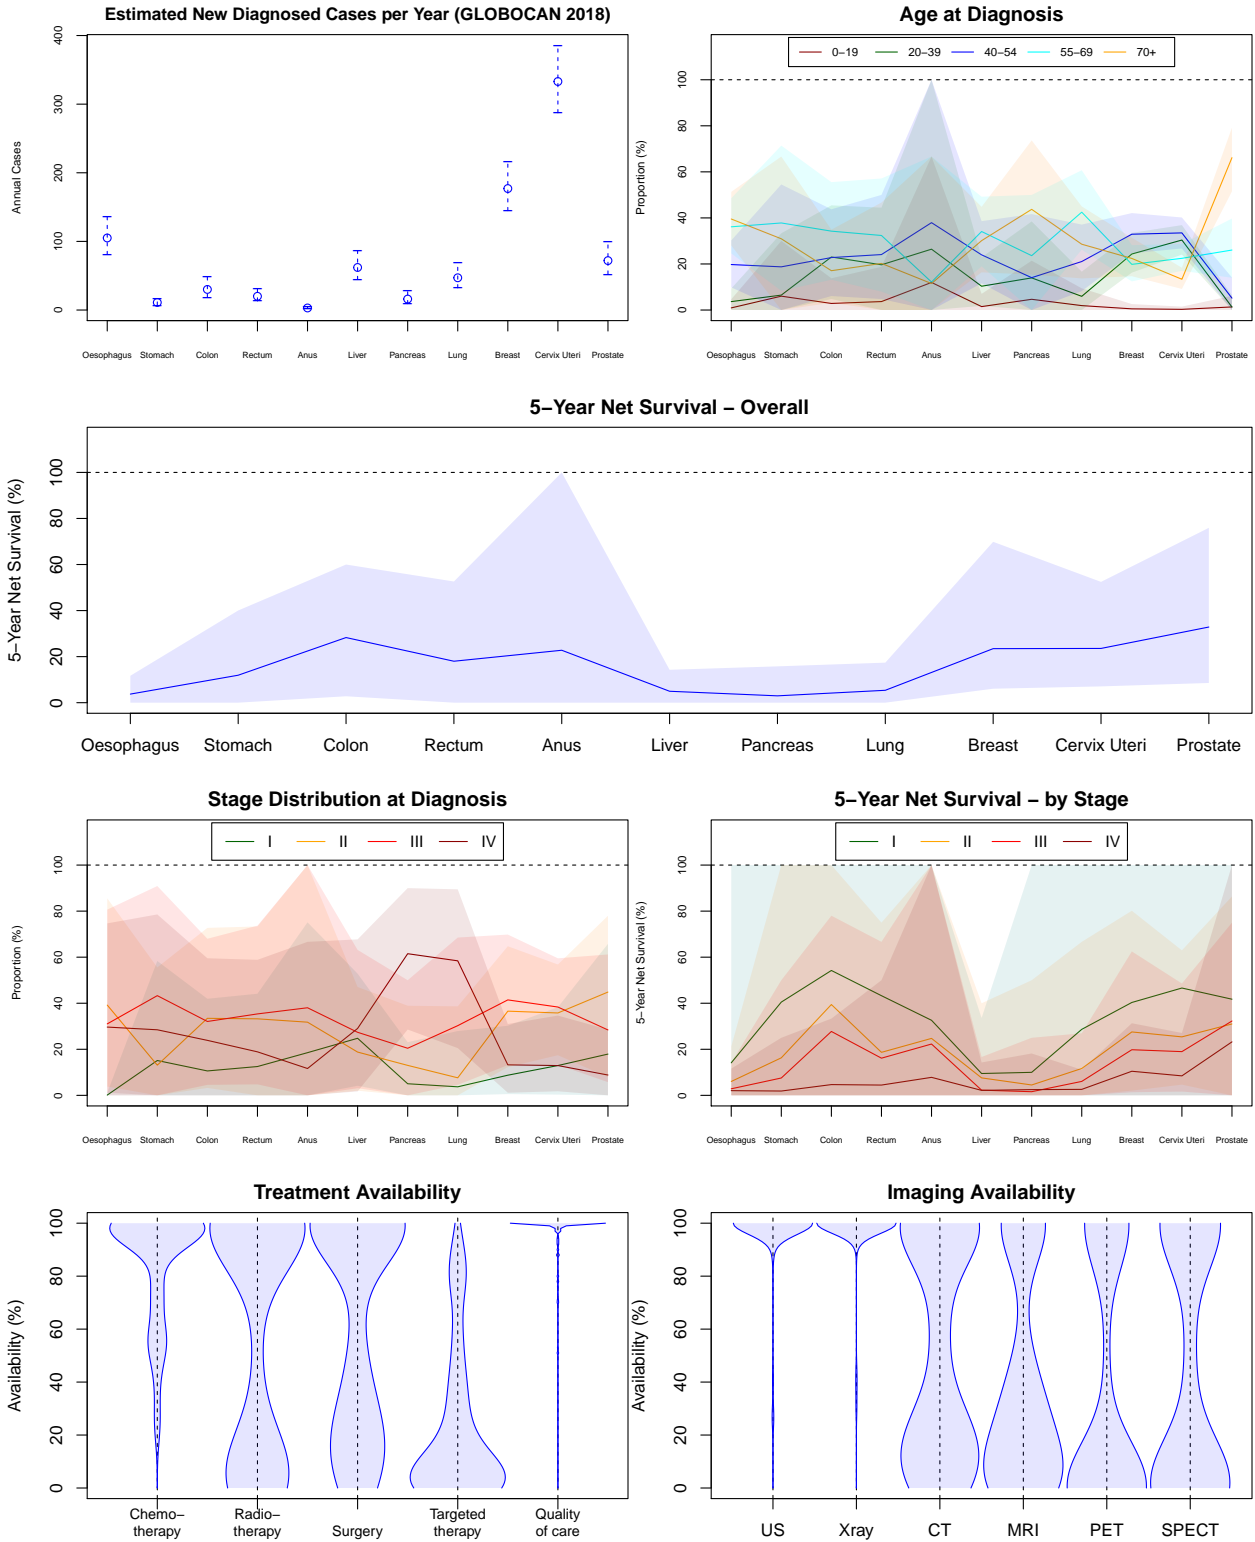

# Brazil

| ISO Code | Region        | Area                            | Income Group        |
|----------|---------------|---------------------------------|---------------------|
| BRA      | South America | Latin America and the Caribbean | Upper middle income |

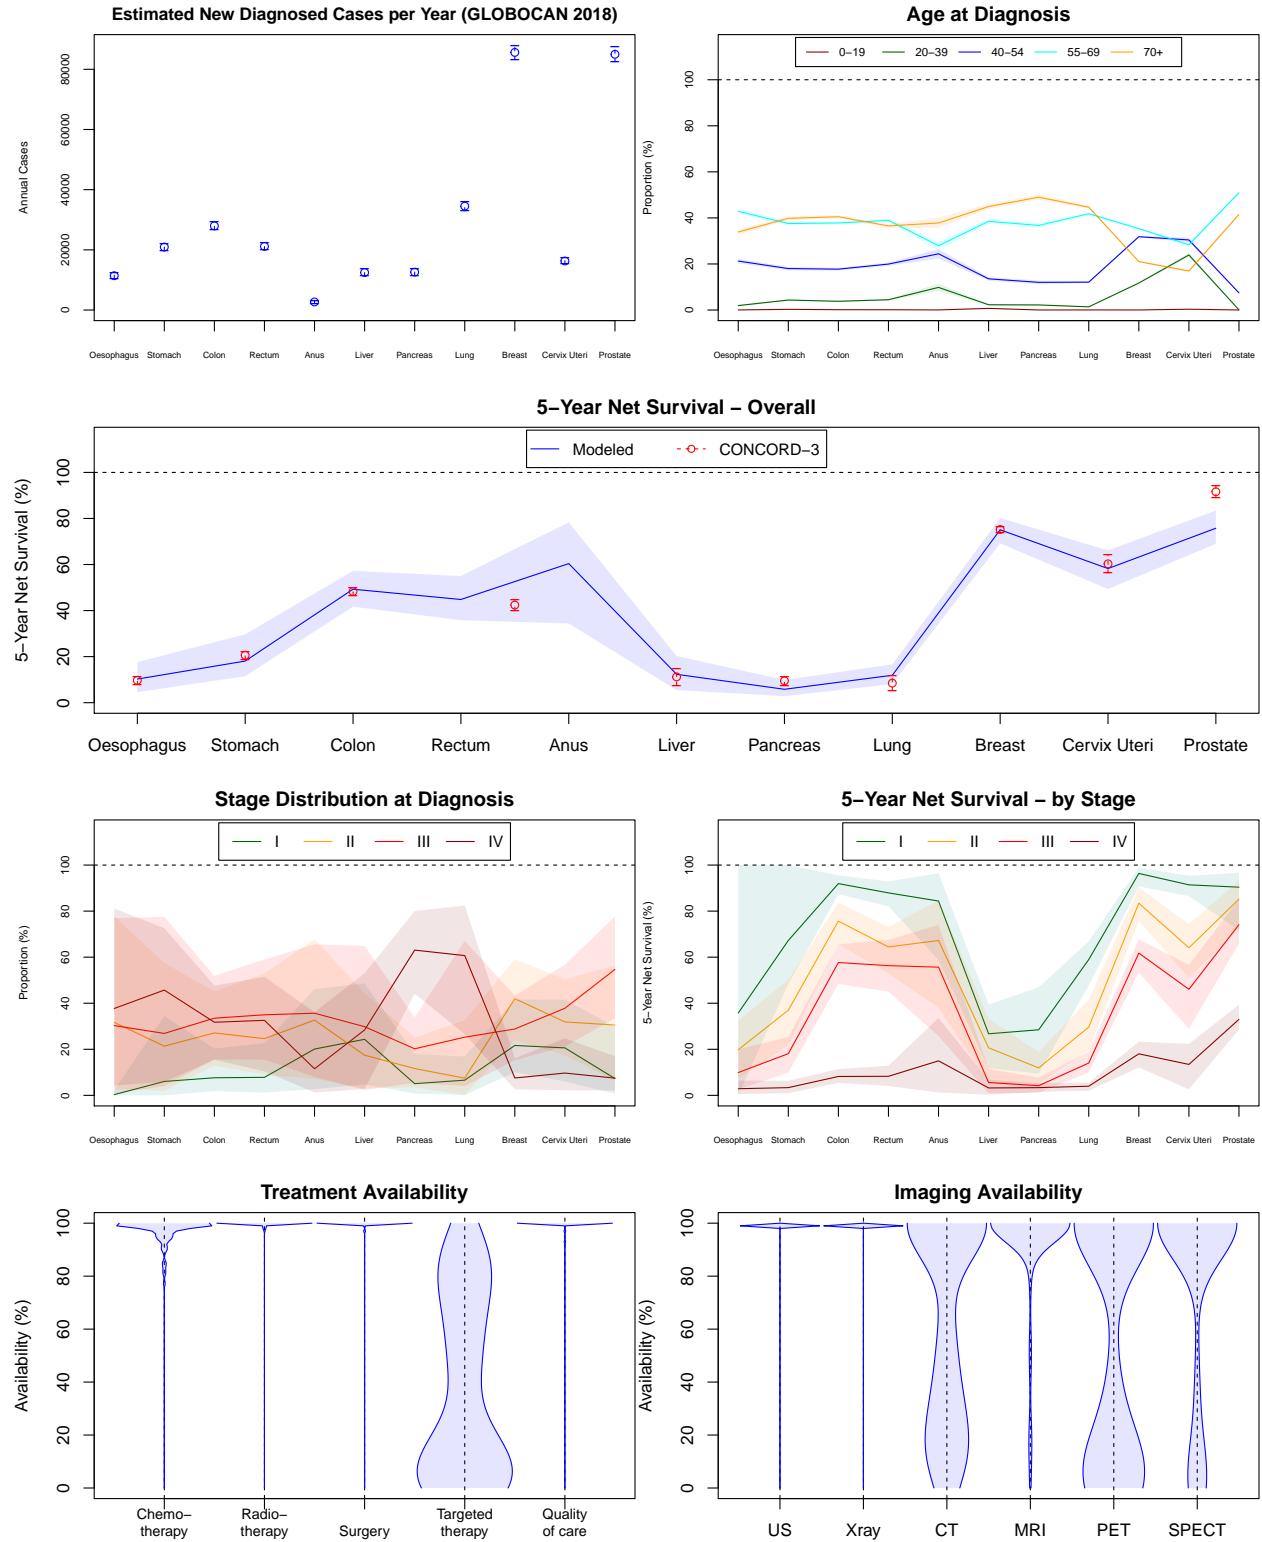

# Brunei Darussalam

| ISO Code | Region             | Area | Income Group |
|----------|--------------------|------|--------------|
| BRN      | South-Eastern Asia | Asia | High income  |

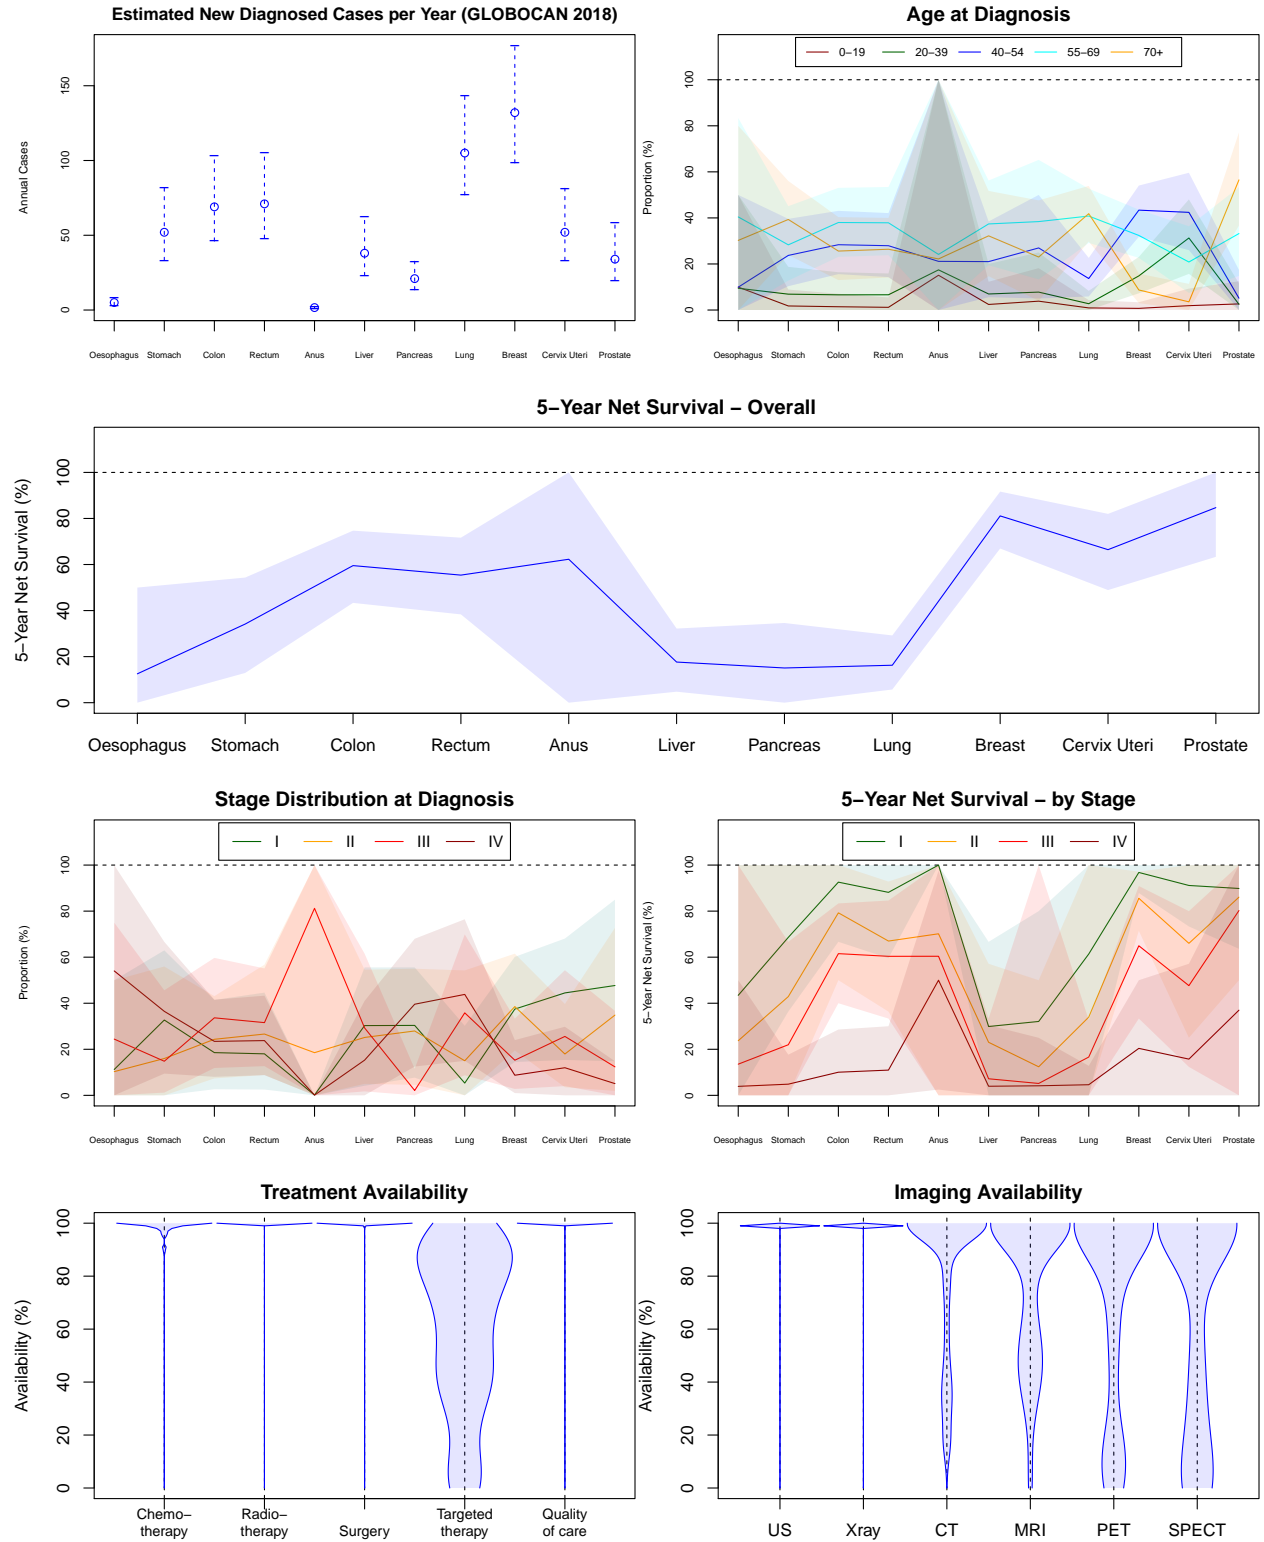



# Bulgaria

| ISO Code | Region         | Area   | Income Group        |
|----------|----------------|--------|---------------------|
| BGR      | Eastern Europe | Europe | Upper middle income |

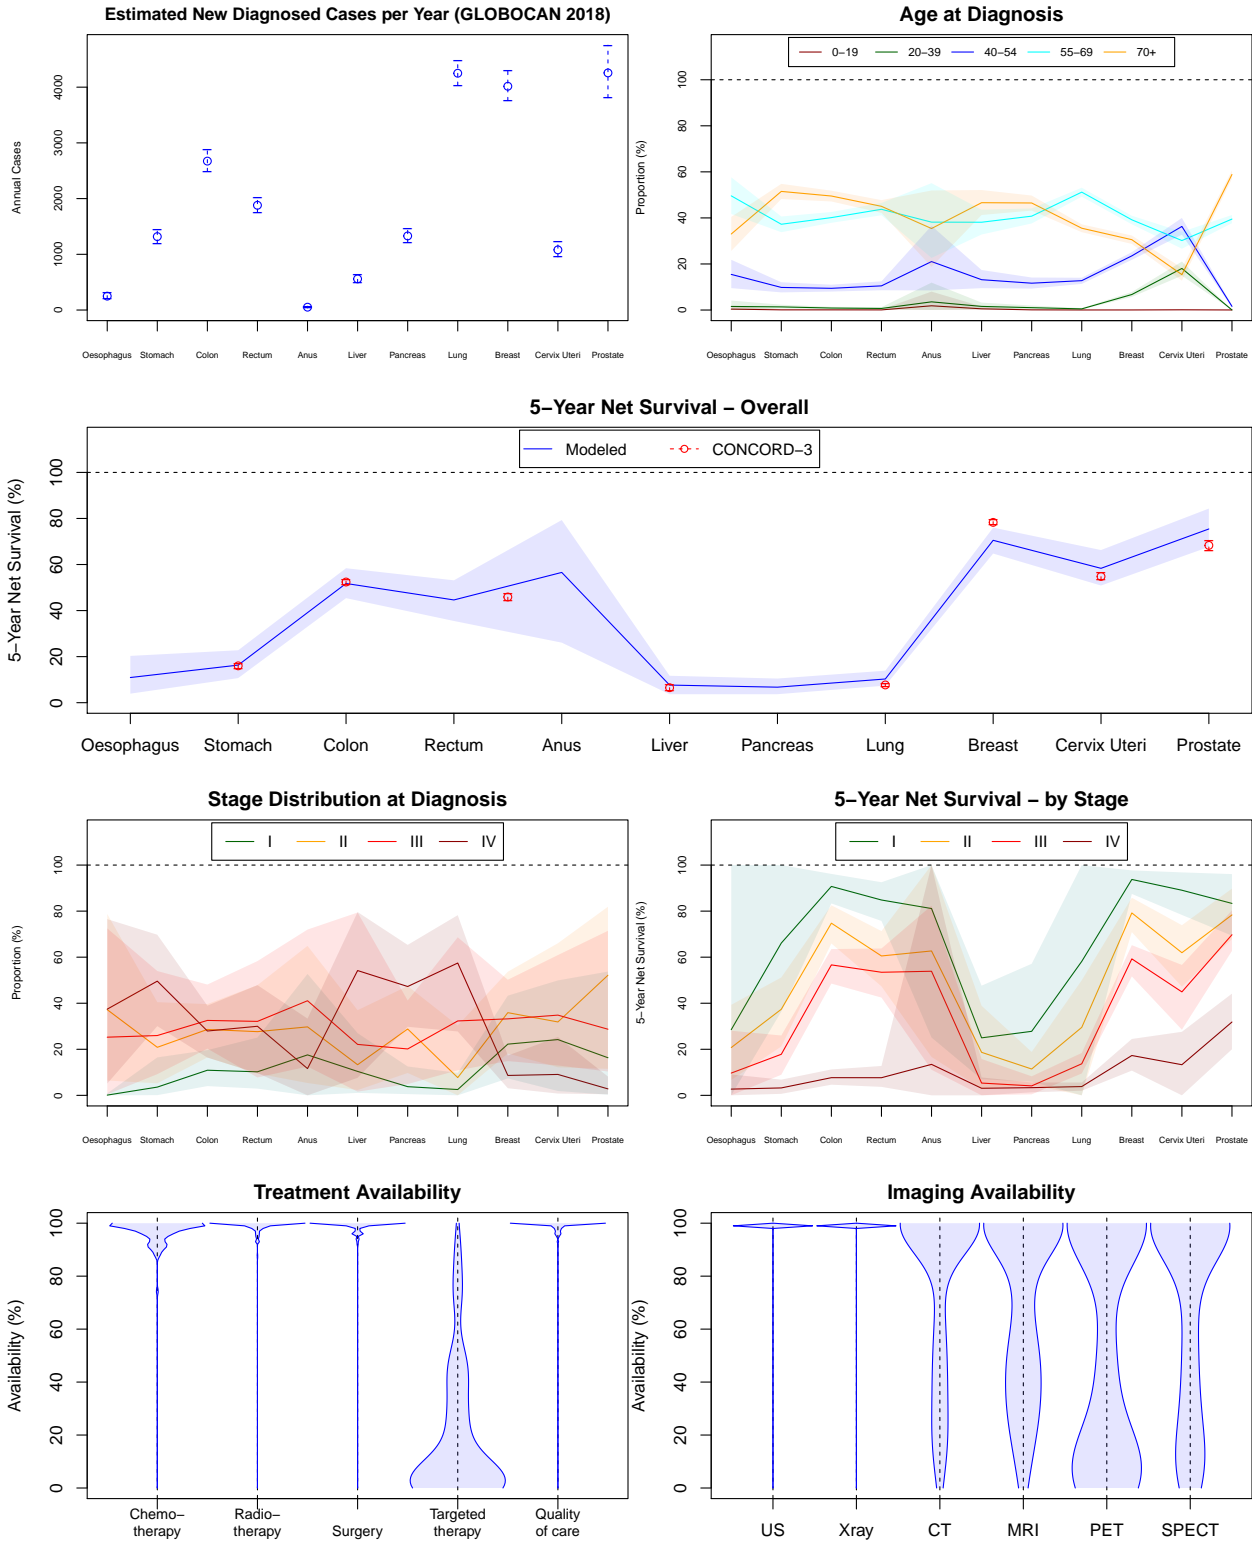

# Burkina Faso

| ISO Code | Region         | Area   | Income Group |
|----------|----------------|--------|--------------|
| BFA      | Western Africa | Africa | Low income   |

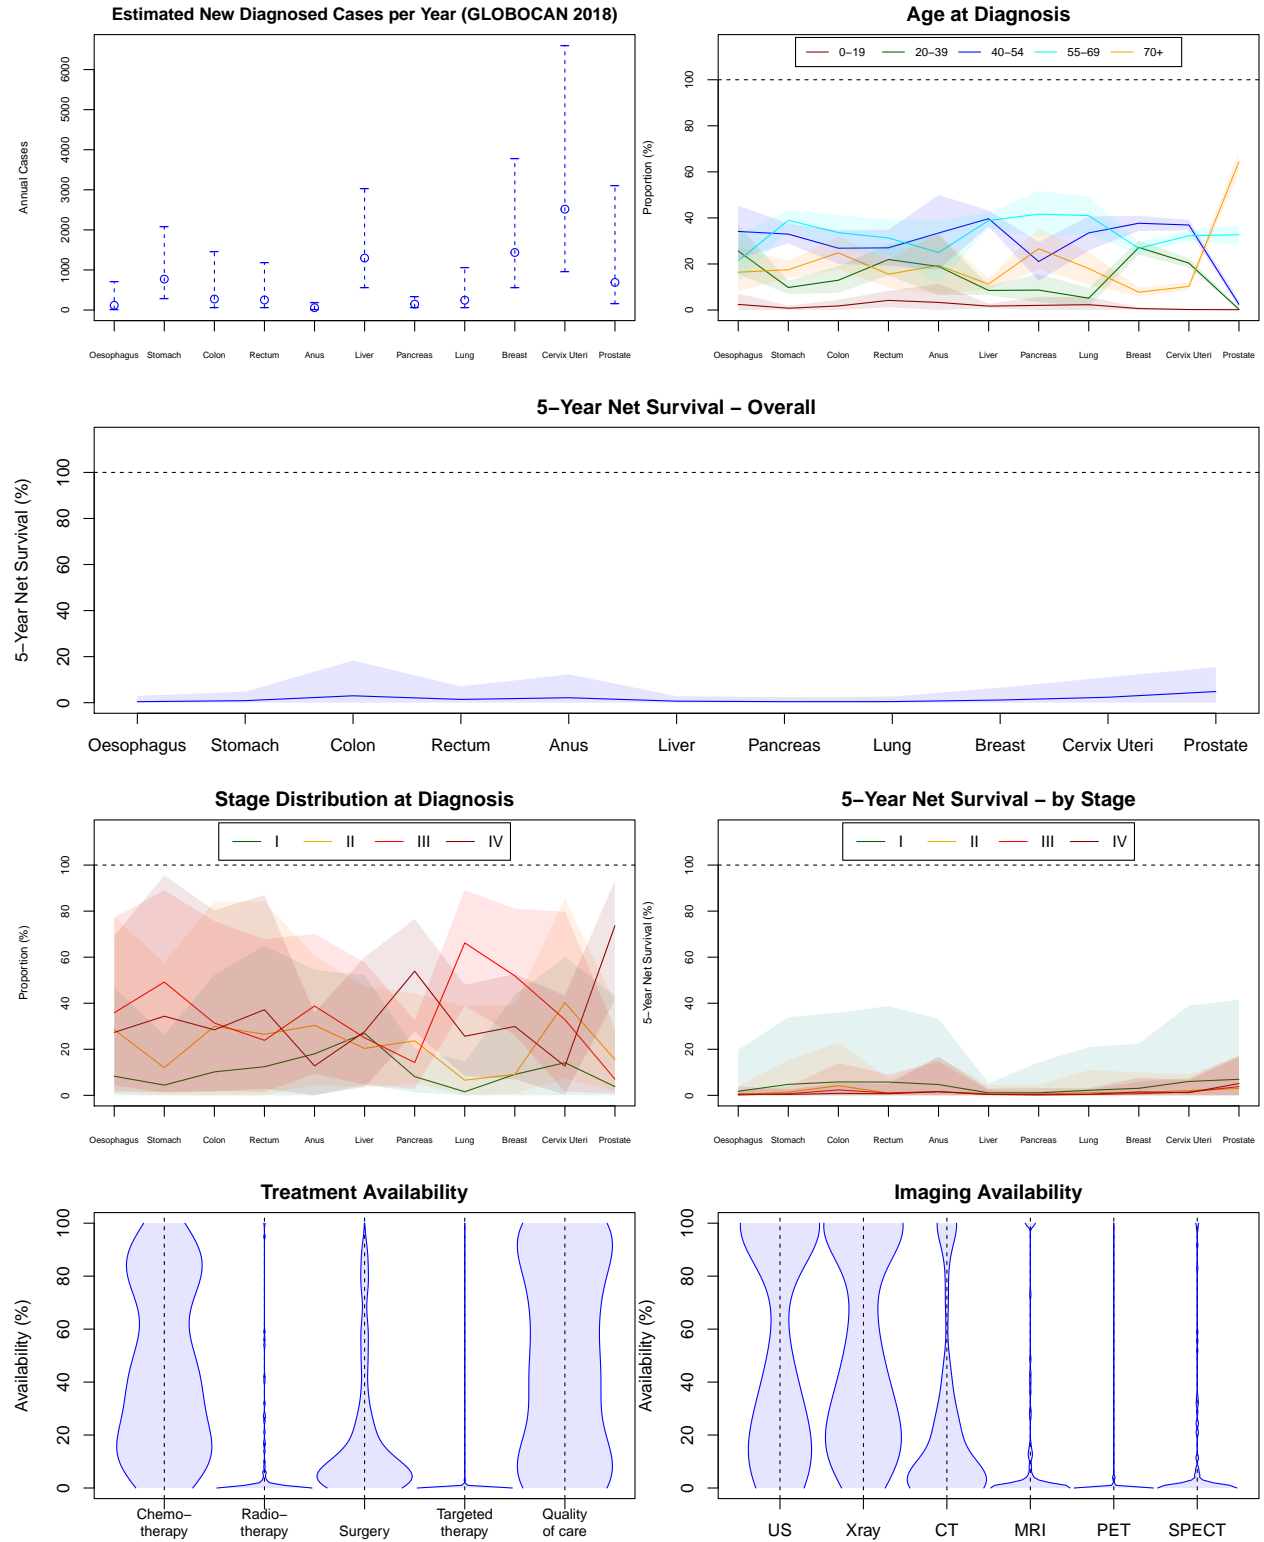

# Burundi

| ISO Code | Region         | Area   | Income Group |
|----------|----------------|--------|--------------|
| BDI      | Eastern Africa | Africa | Low income   |

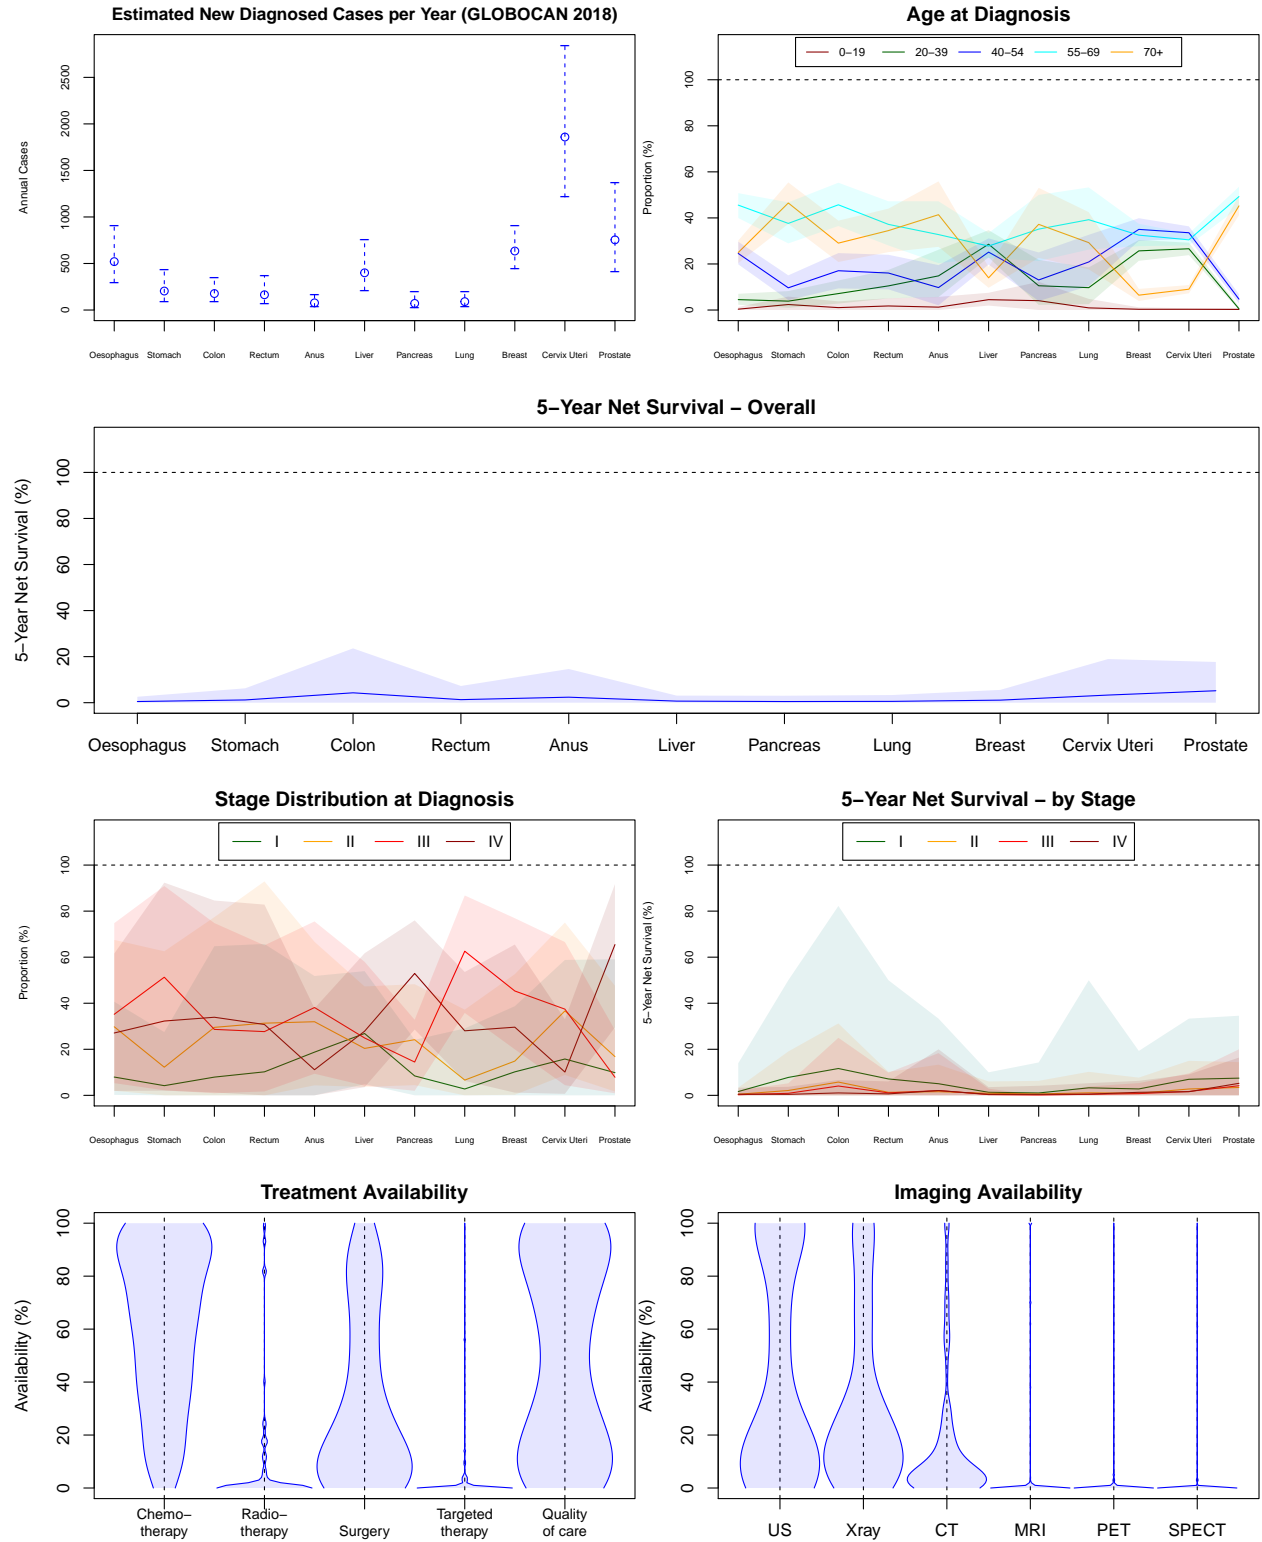

# Cabo Verde

| ISO Code | Region         | Area   | Income Group        |
|----------|----------------|--------|---------------------|
| CPV      | Western Africa | Africa | Lower middle income |

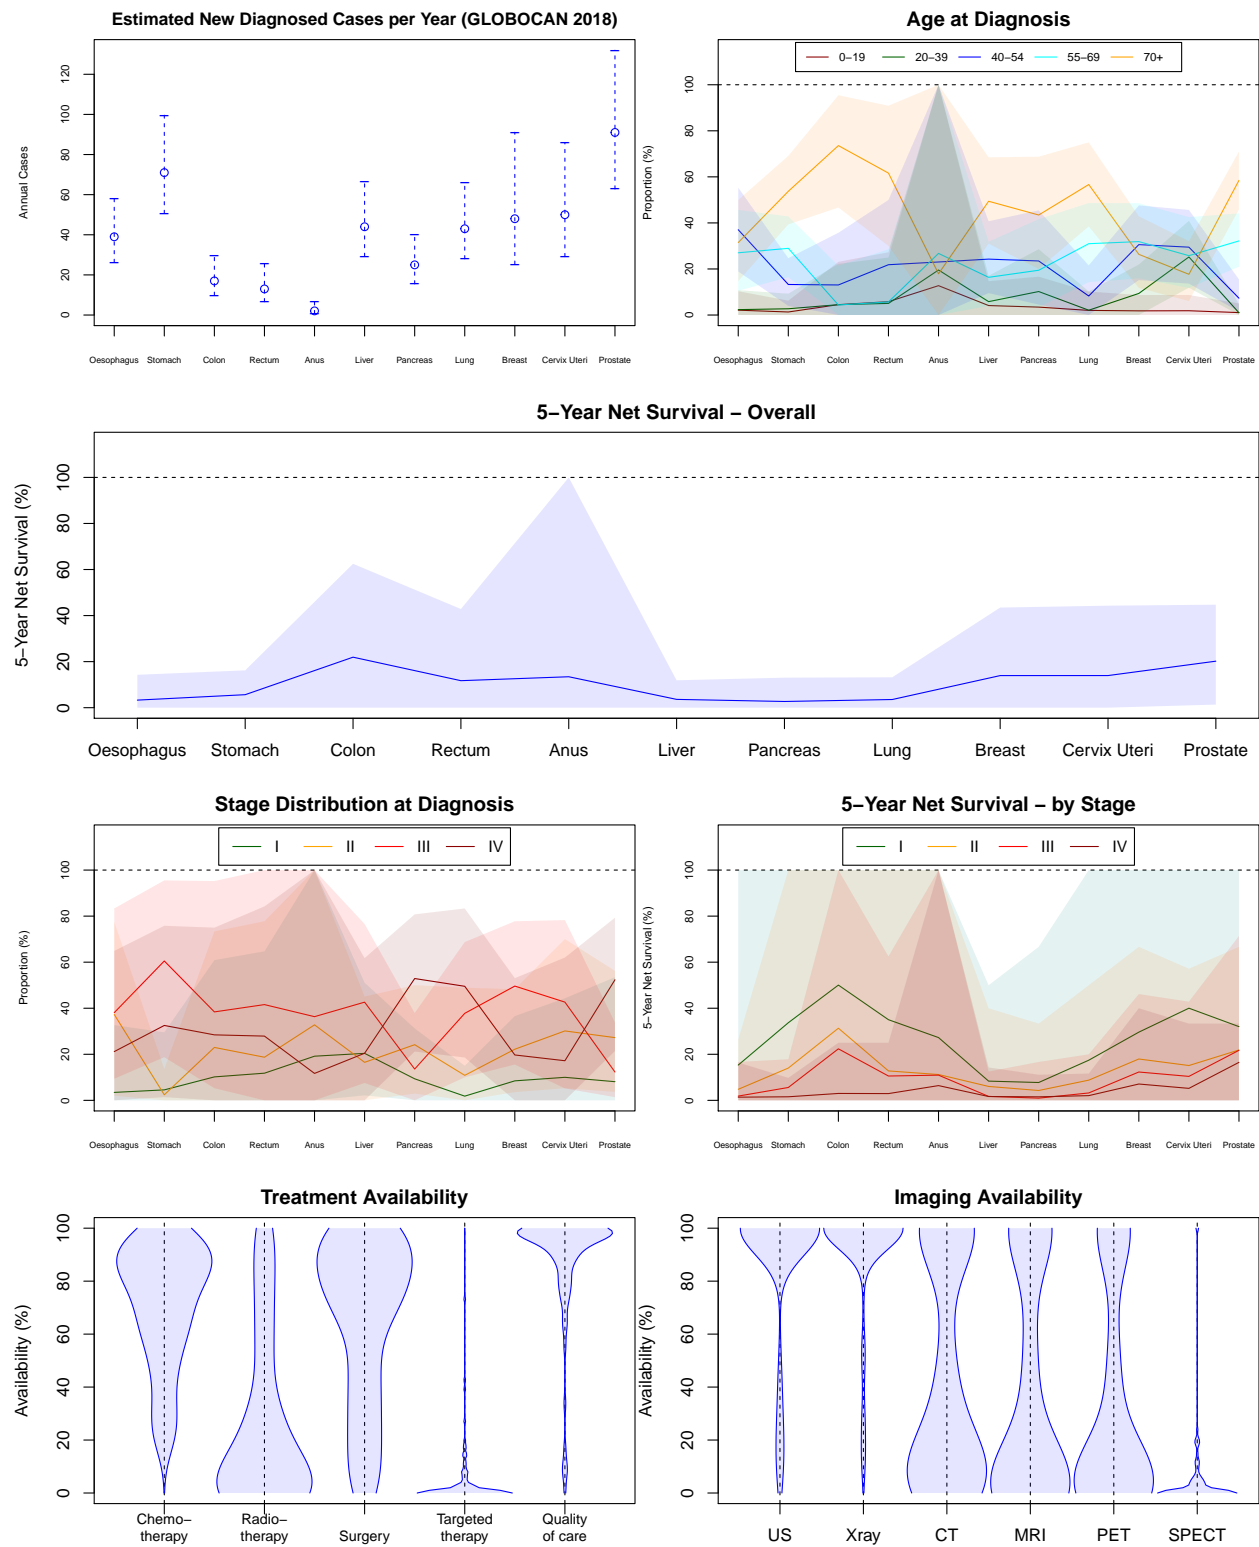

# Cambodia

| ISO Code | Region             | Area | Income Group        |
|----------|--------------------|------|---------------------|
| KHM      | South-Eastern Asia | Asia | Lower middle income |

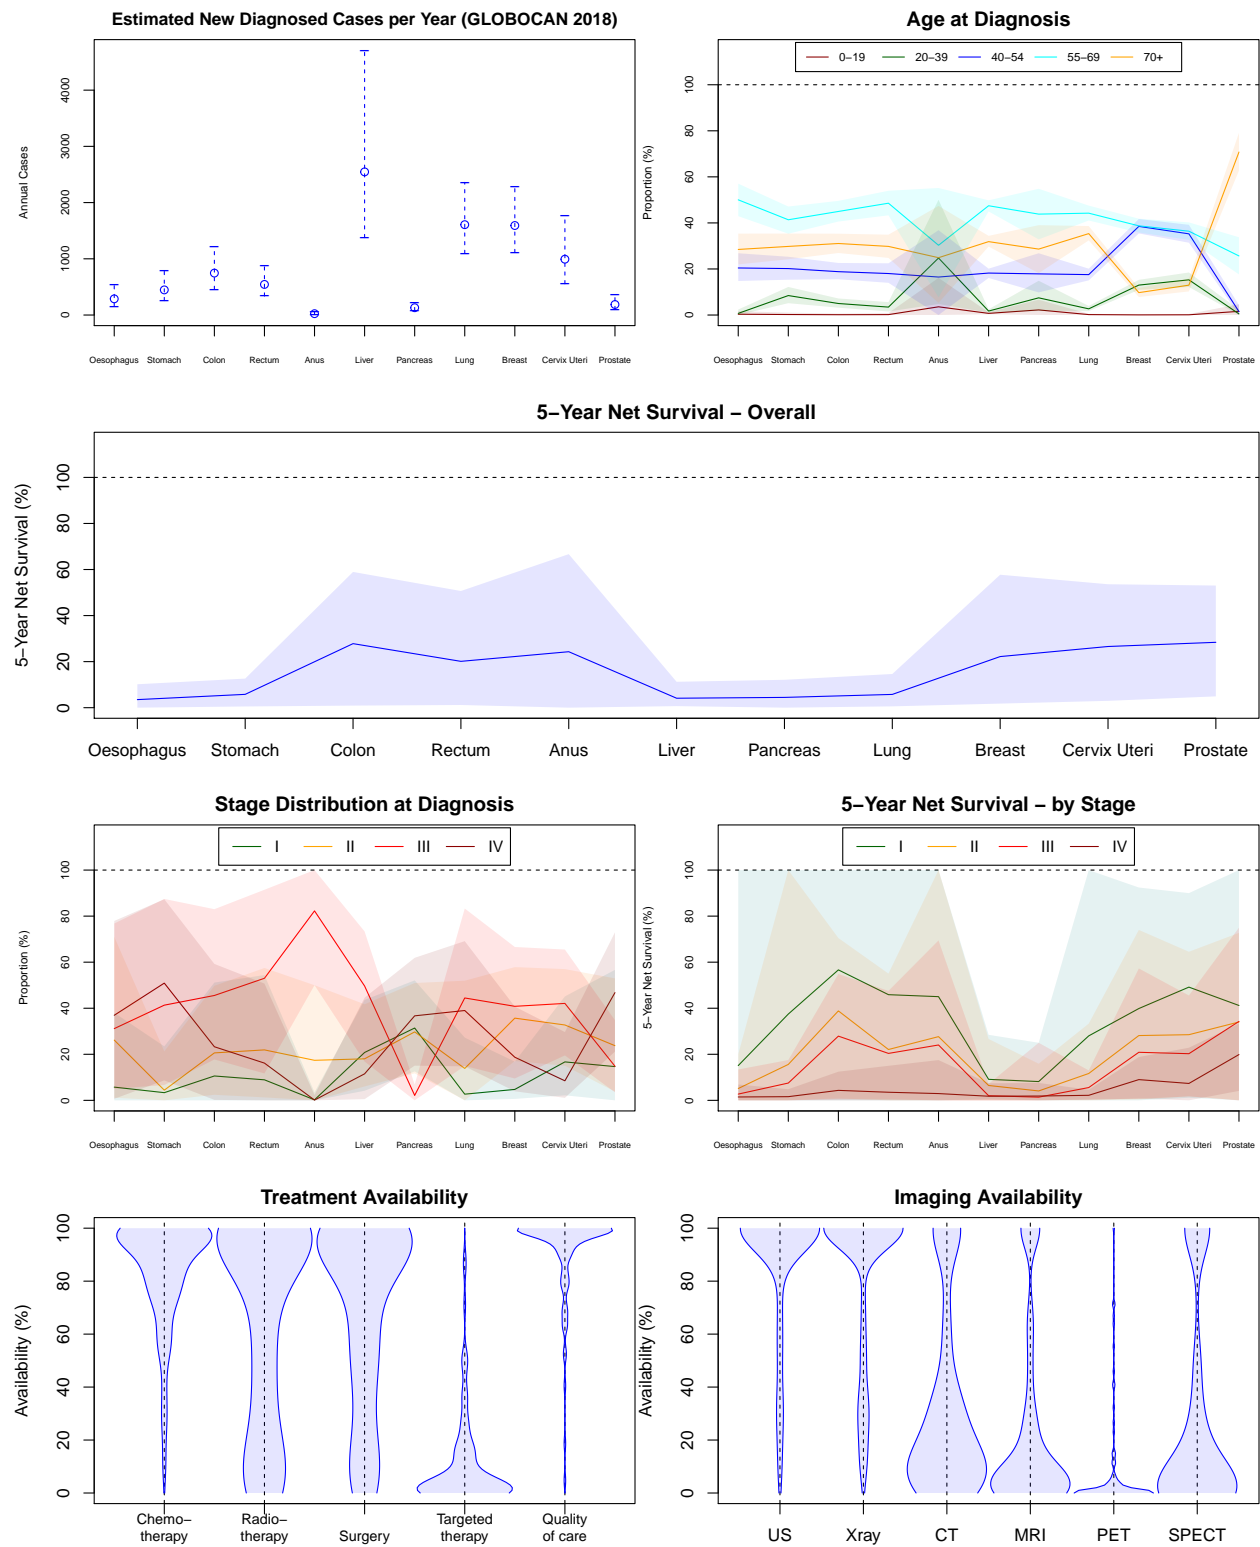

# Cameroon

| ISO Code | Region        | Area   | Income Group        |
|----------|---------------|--------|---------------------|
| CMR      | Middle Africa | Africa | Lower middle income |

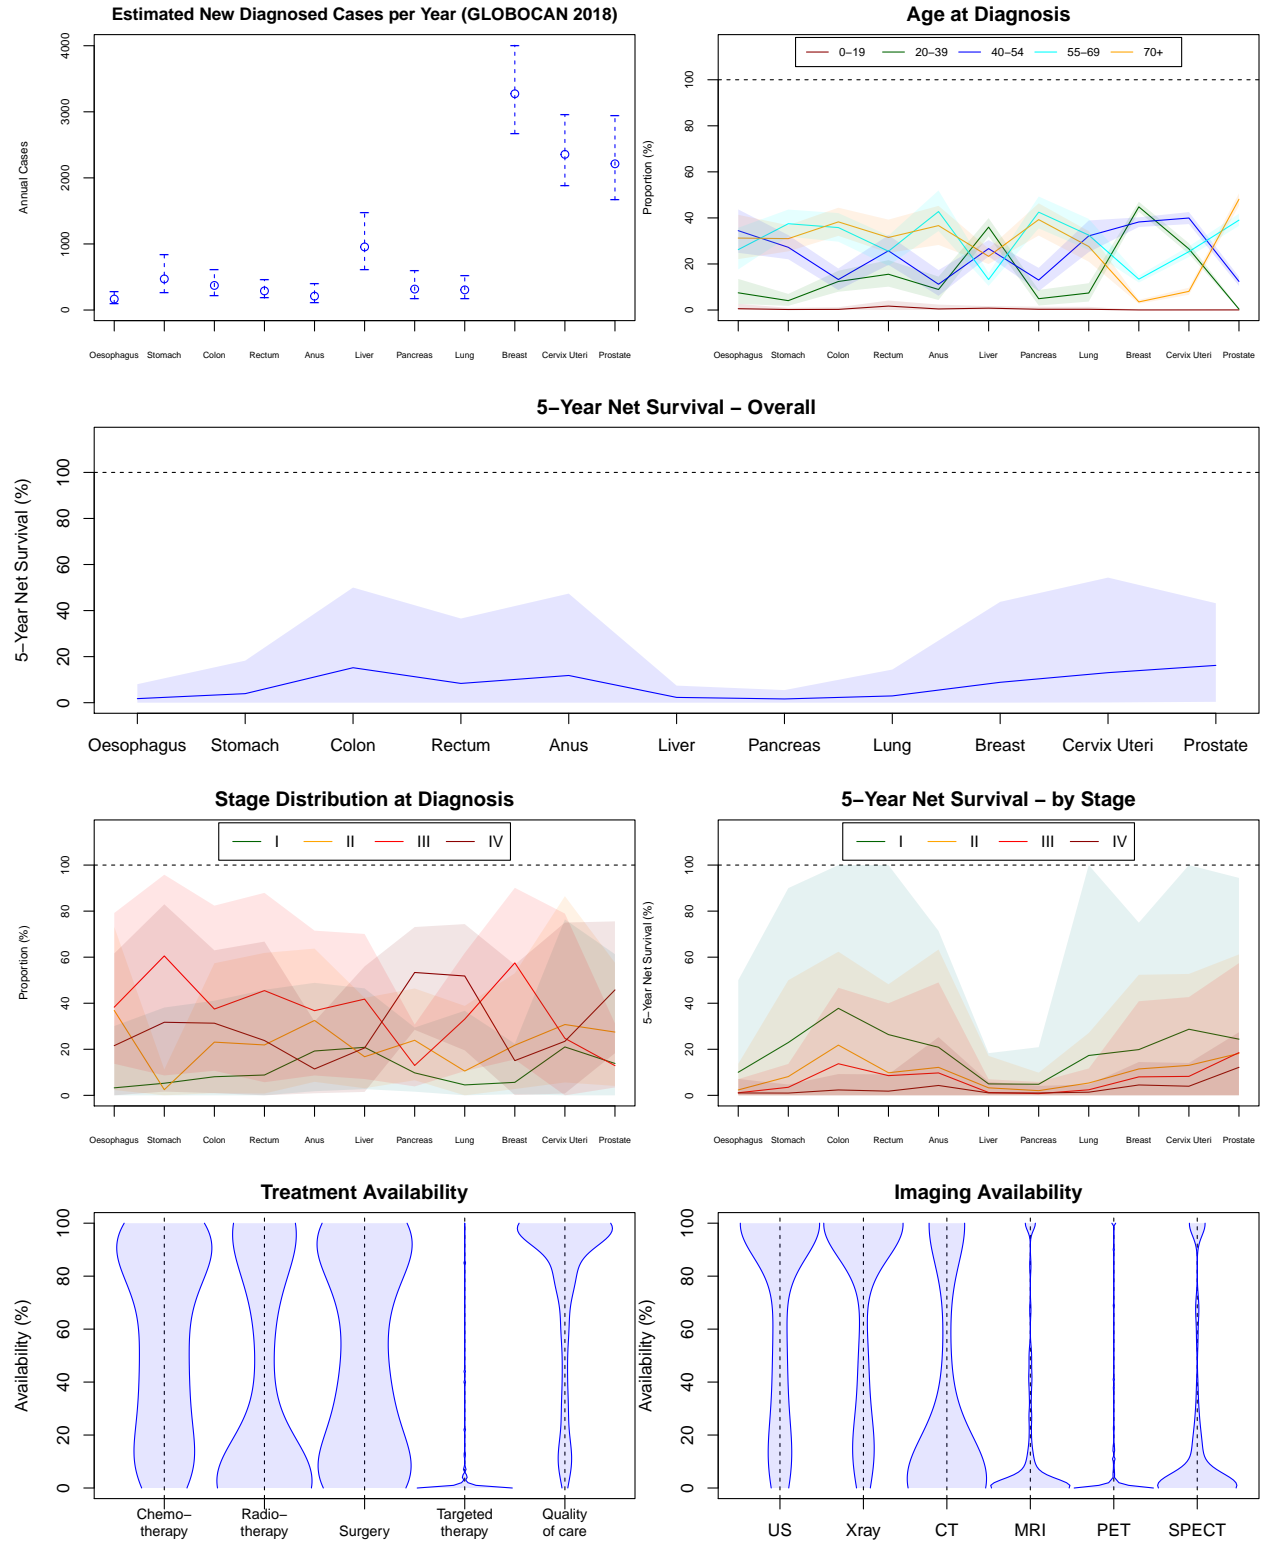

# Canada

| ISO Code | Region           | Area             | Income Group |
|----------|------------------|------------------|--------------|
| CAN      | Northern America | Northern America | High income  |

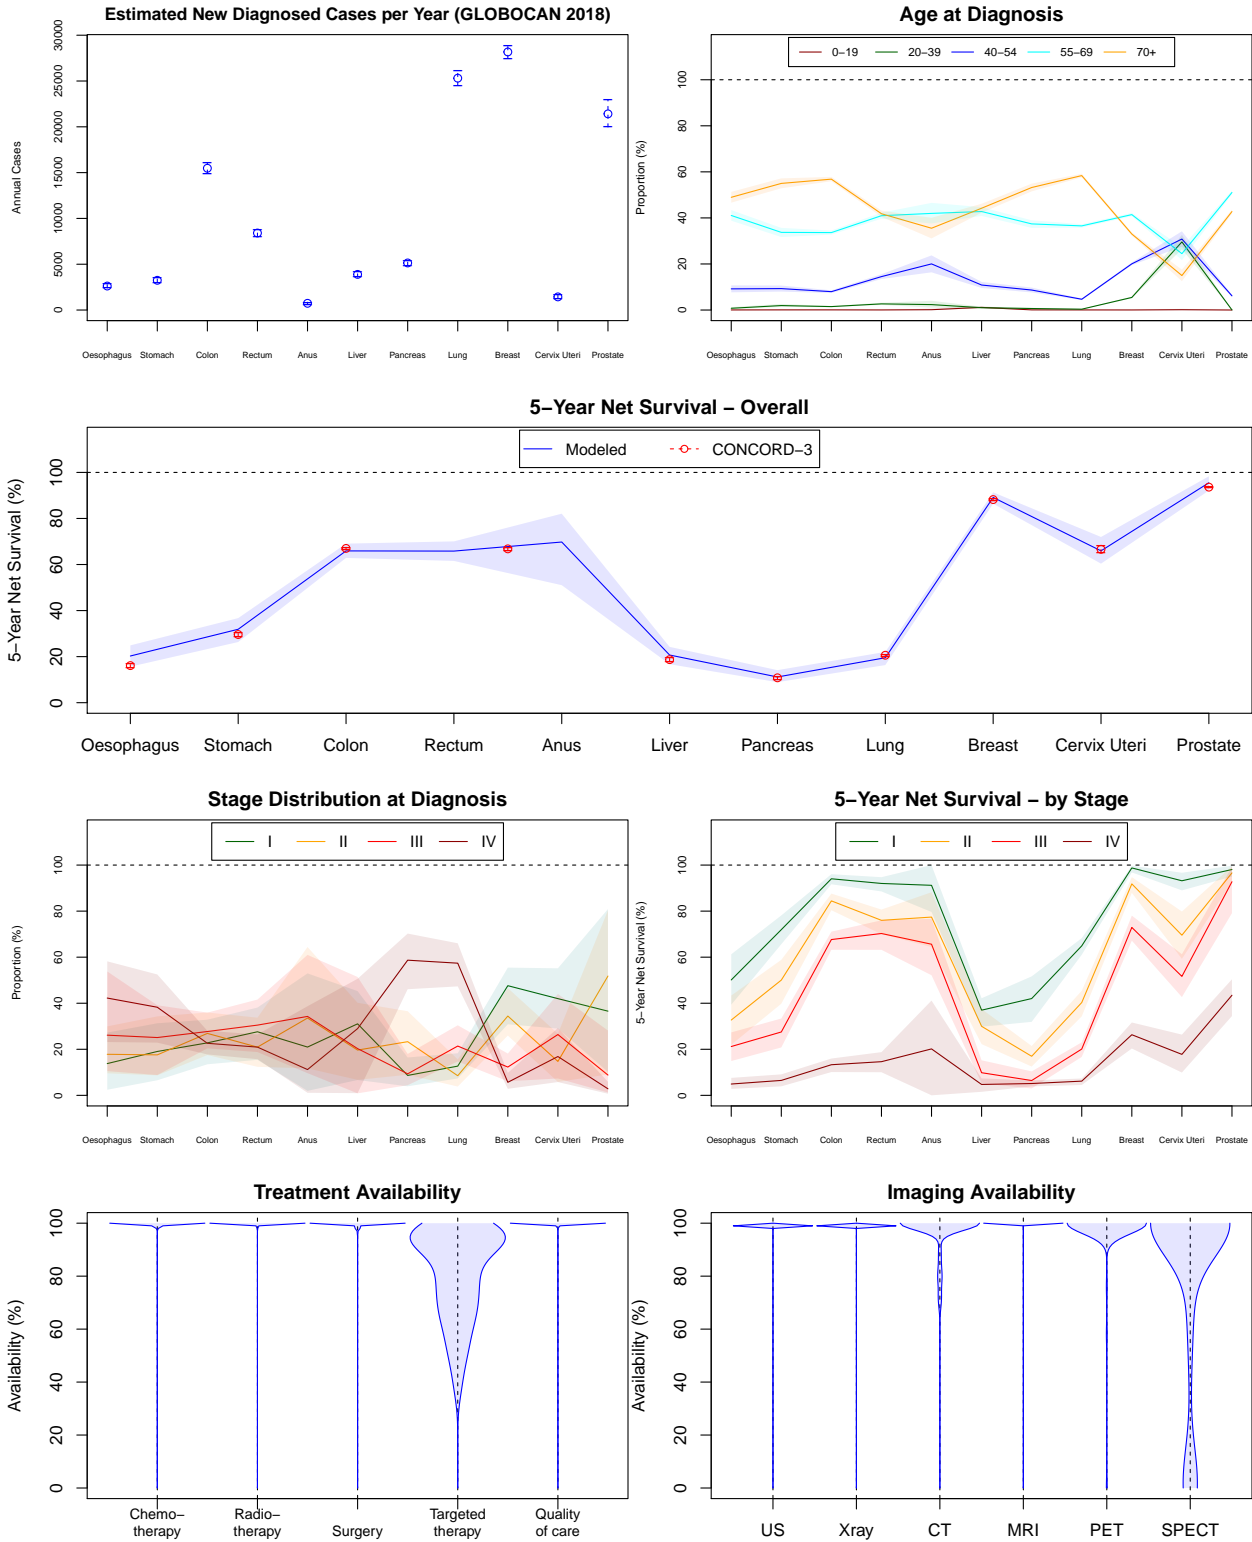

# Cayman Islands

| ISO Code | Region    | Area                            | Income Group |
|----------|-----------|---------------------------------|--------------|
| CYM      | Caribbean | Latin America and the Caribbean | High income  |

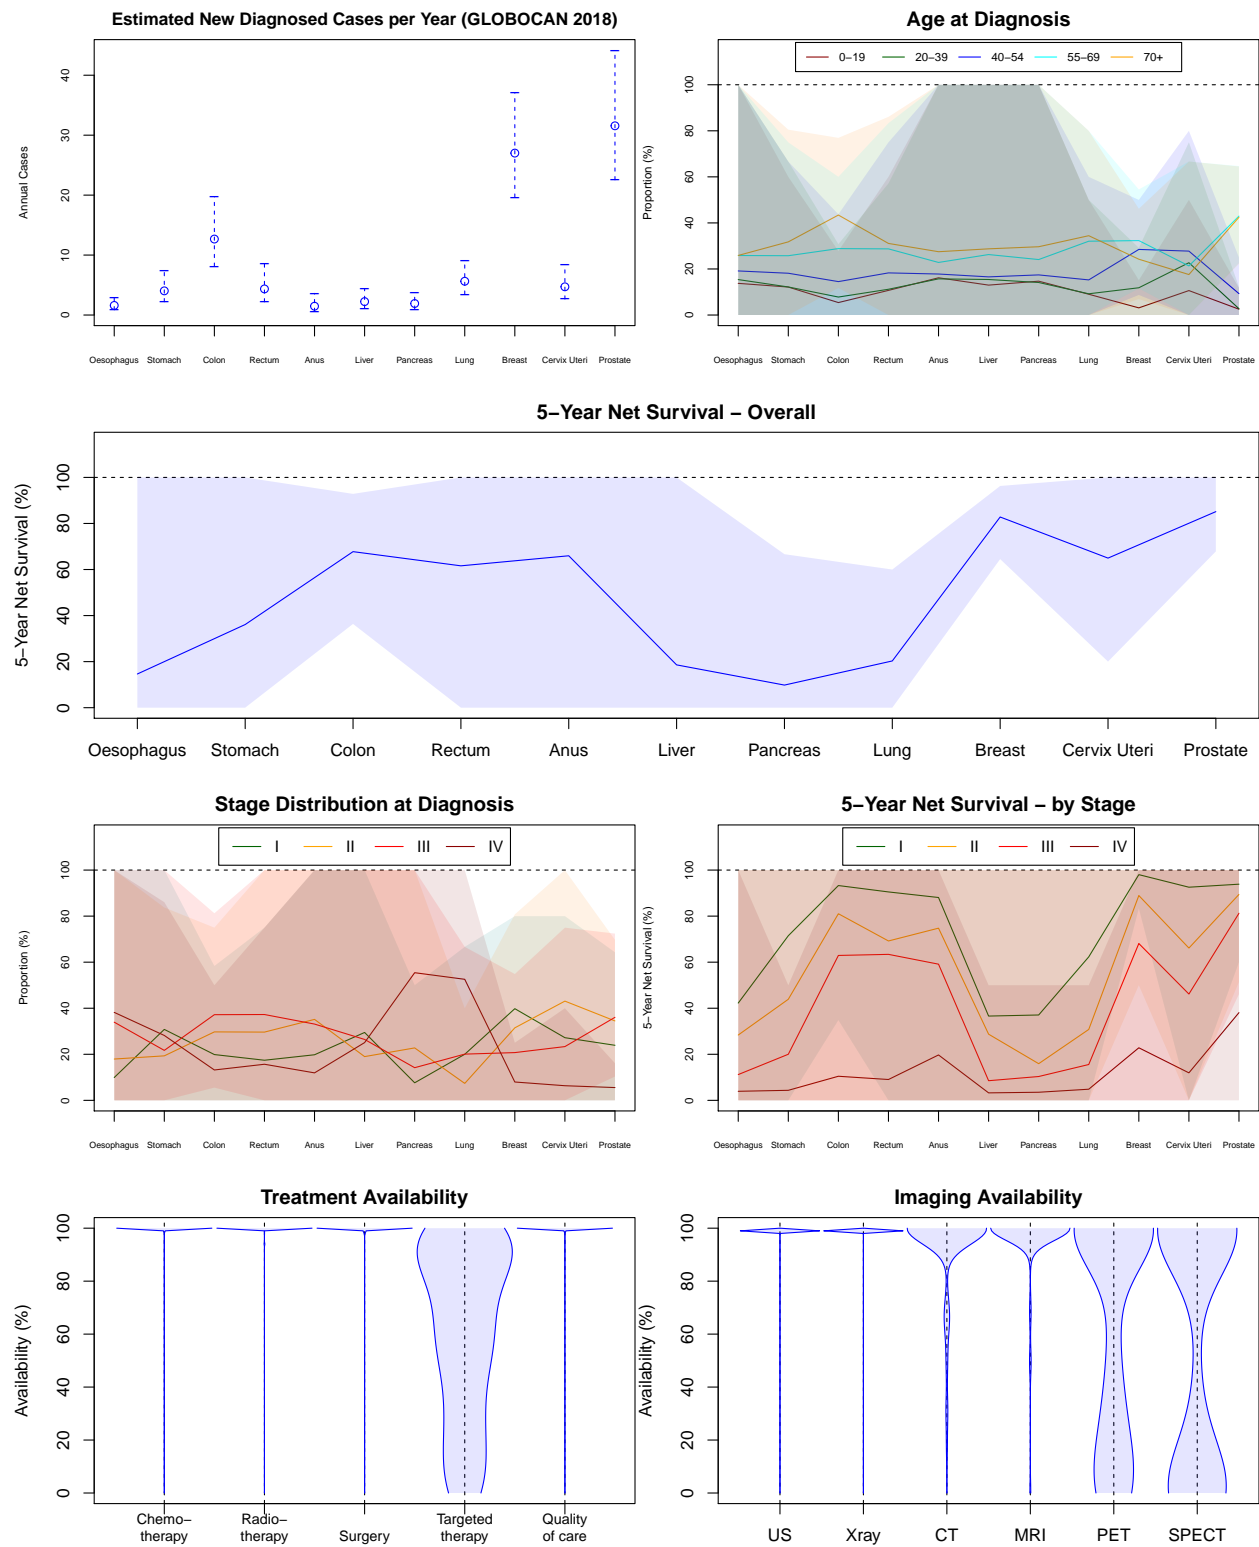



# Central African Republic

| ISO Code | Region        | Area   | Income Group |
|----------|---------------|--------|--------------|
| CAF      | Middle Africa | Africa | Low income   |

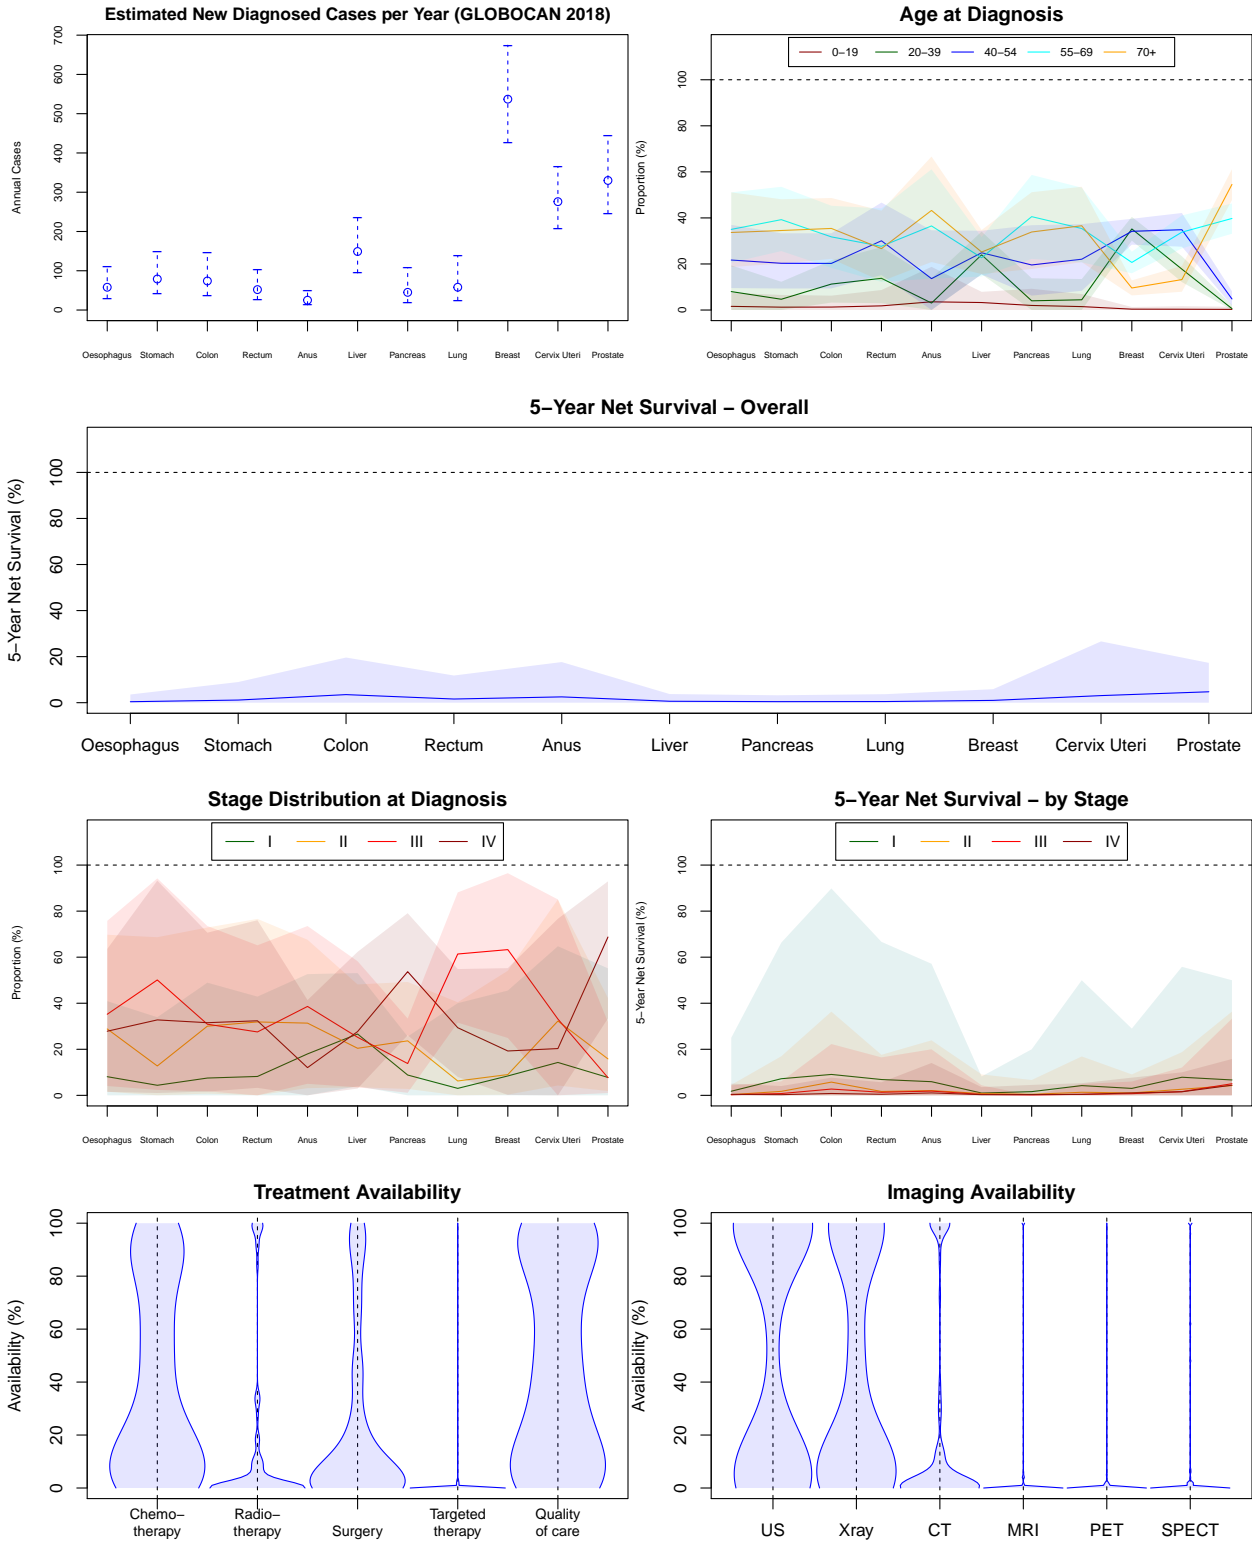

# Chad

| ISO Code | Region        | Area   | Income Group |
|----------|---------------|--------|--------------|
| TCD      | Middle Africa | Africa | Low income   |

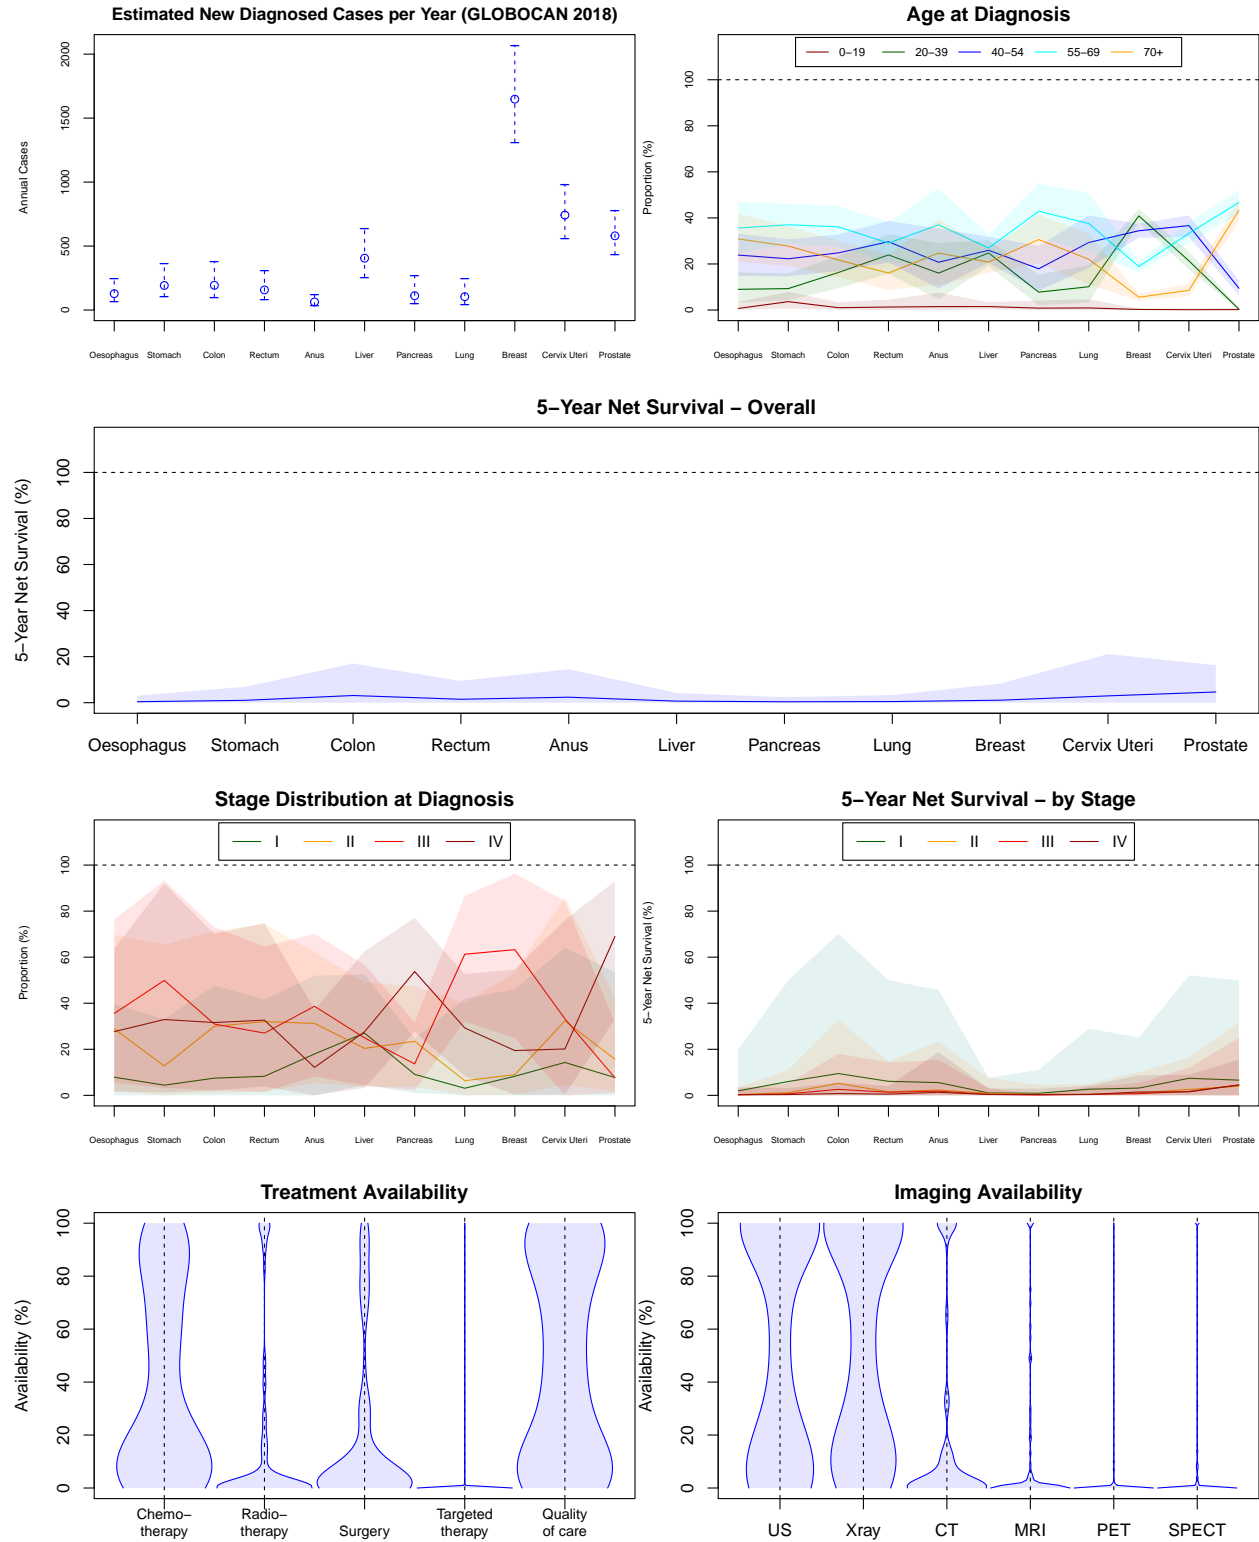

# Chile

| ISO Code | Region        | Area                            | Income Group |
|----------|---------------|---------------------------------|--------------|
| CHL      | South America | Latin America and the Caribbean | High income  |

Estimated New Diagnosed Cases per Year (GLOBOCAN 2018)

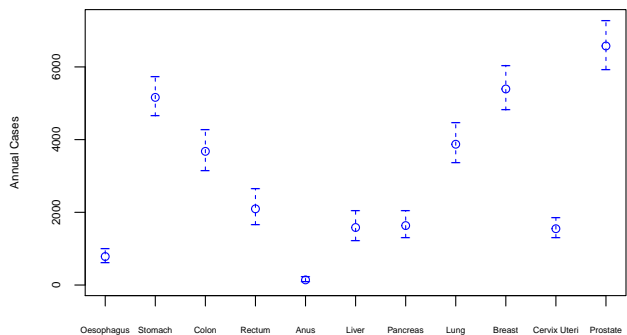

Age at Diagnosis

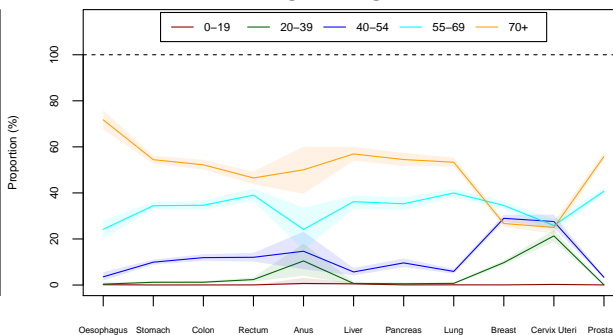

5-Year Net Survival – Overall

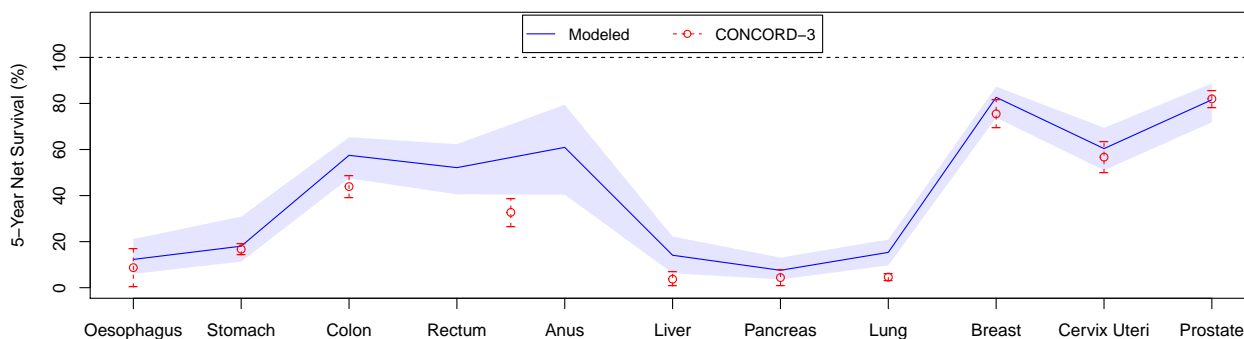

Stage Distribution at Diagnosis

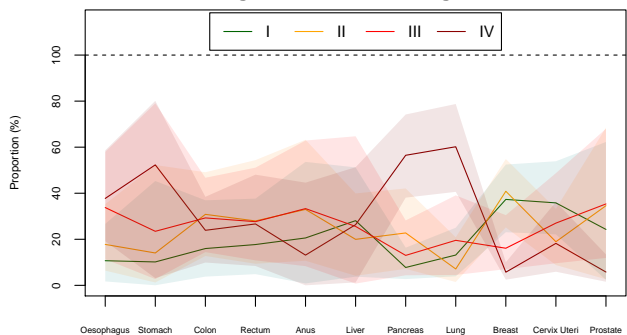

5-Year Net Survival – by Stage

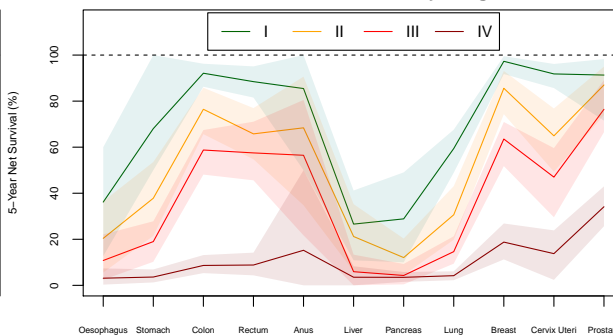

Treatment Availability

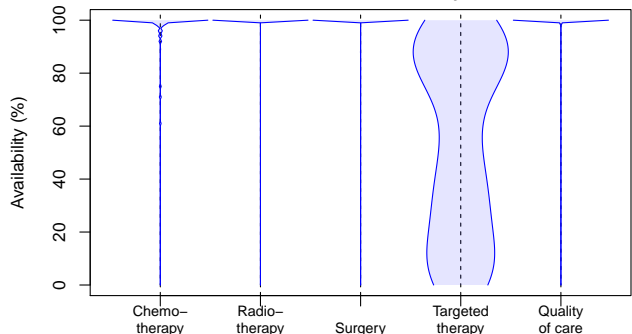

Imaging Availability

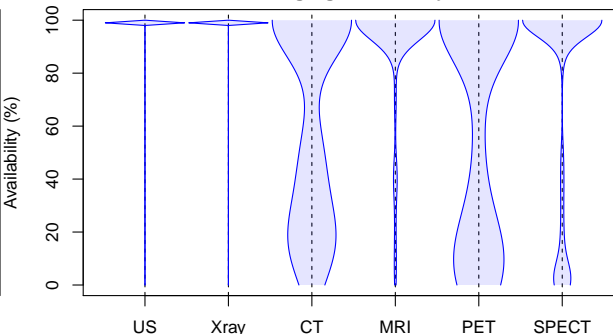

# China

| ISO Code | Region       | Area | Income Group        |
|----------|--------------|------|---------------------|
| CHN      | Eastern Asia | Asia | Upper middle income |

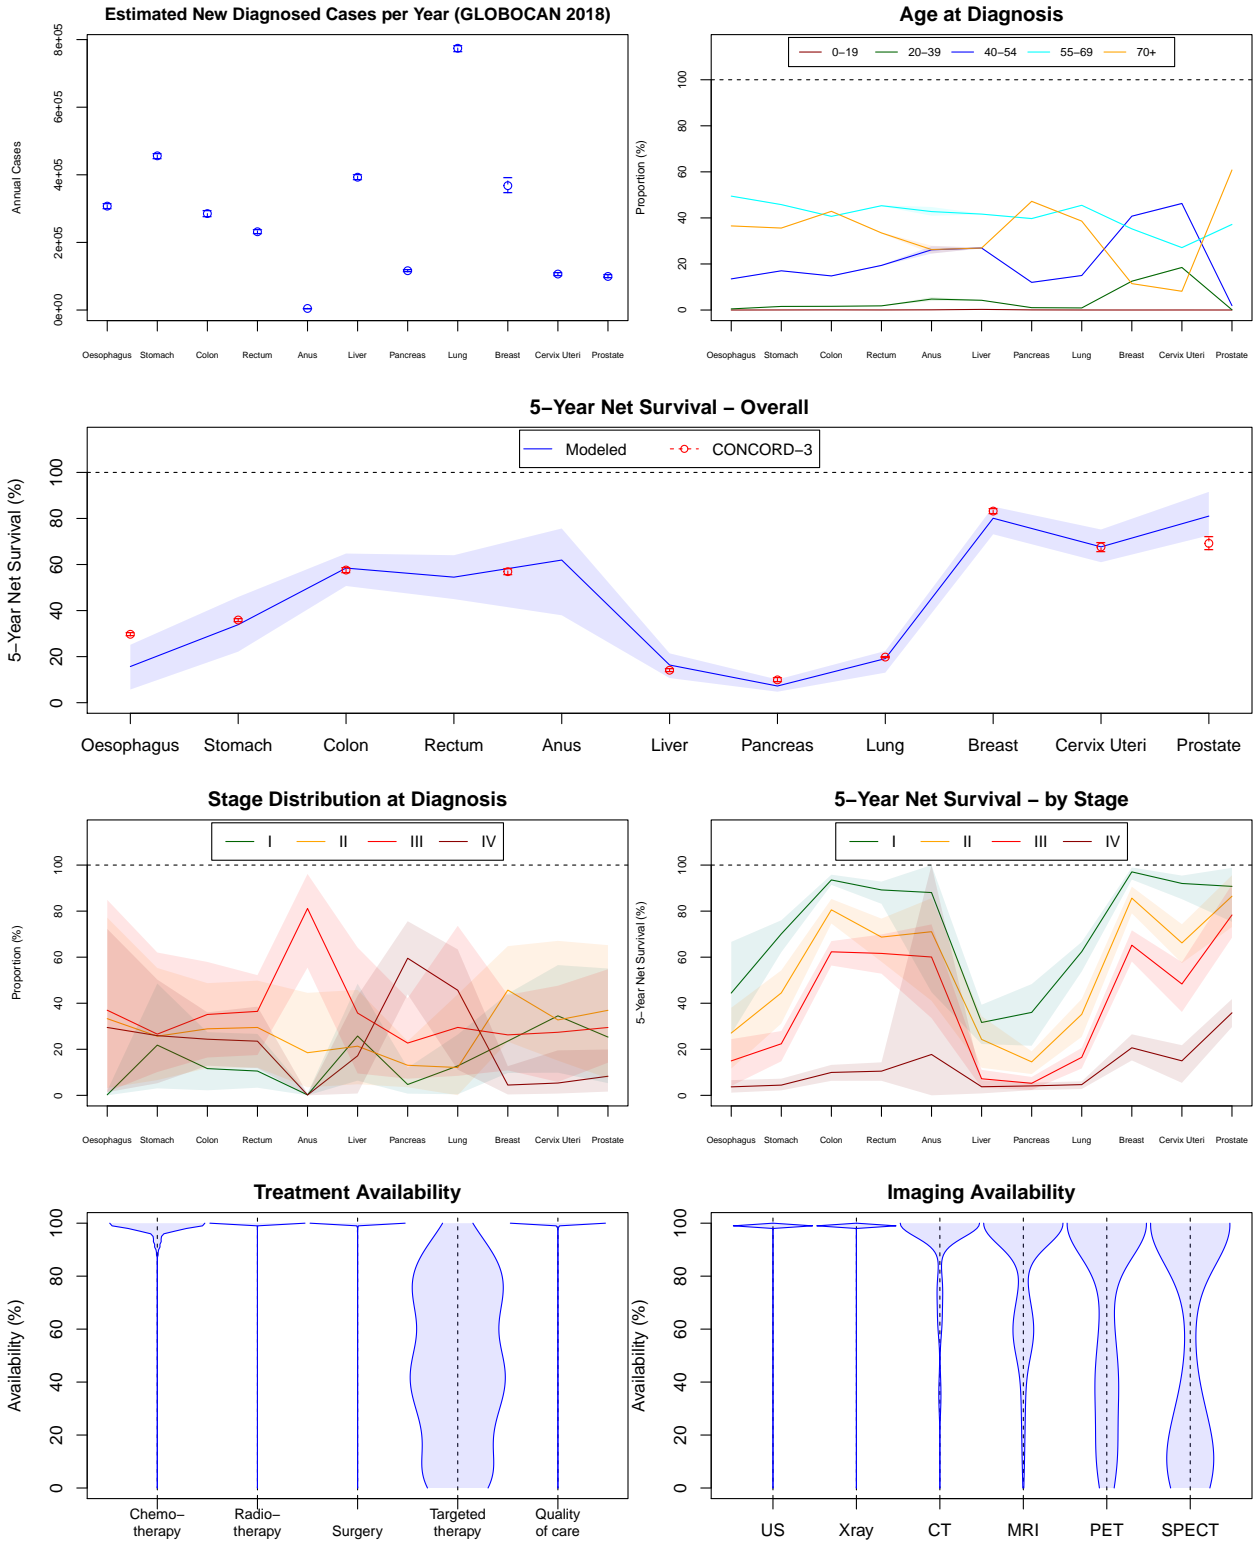

# Colombia

| ISO Code | Region        | Area                            | Income Group        |
|----------|---------------|---------------------------------|---------------------|
| COL      | South America | Latin America and the Caribbean | Upper middle income |

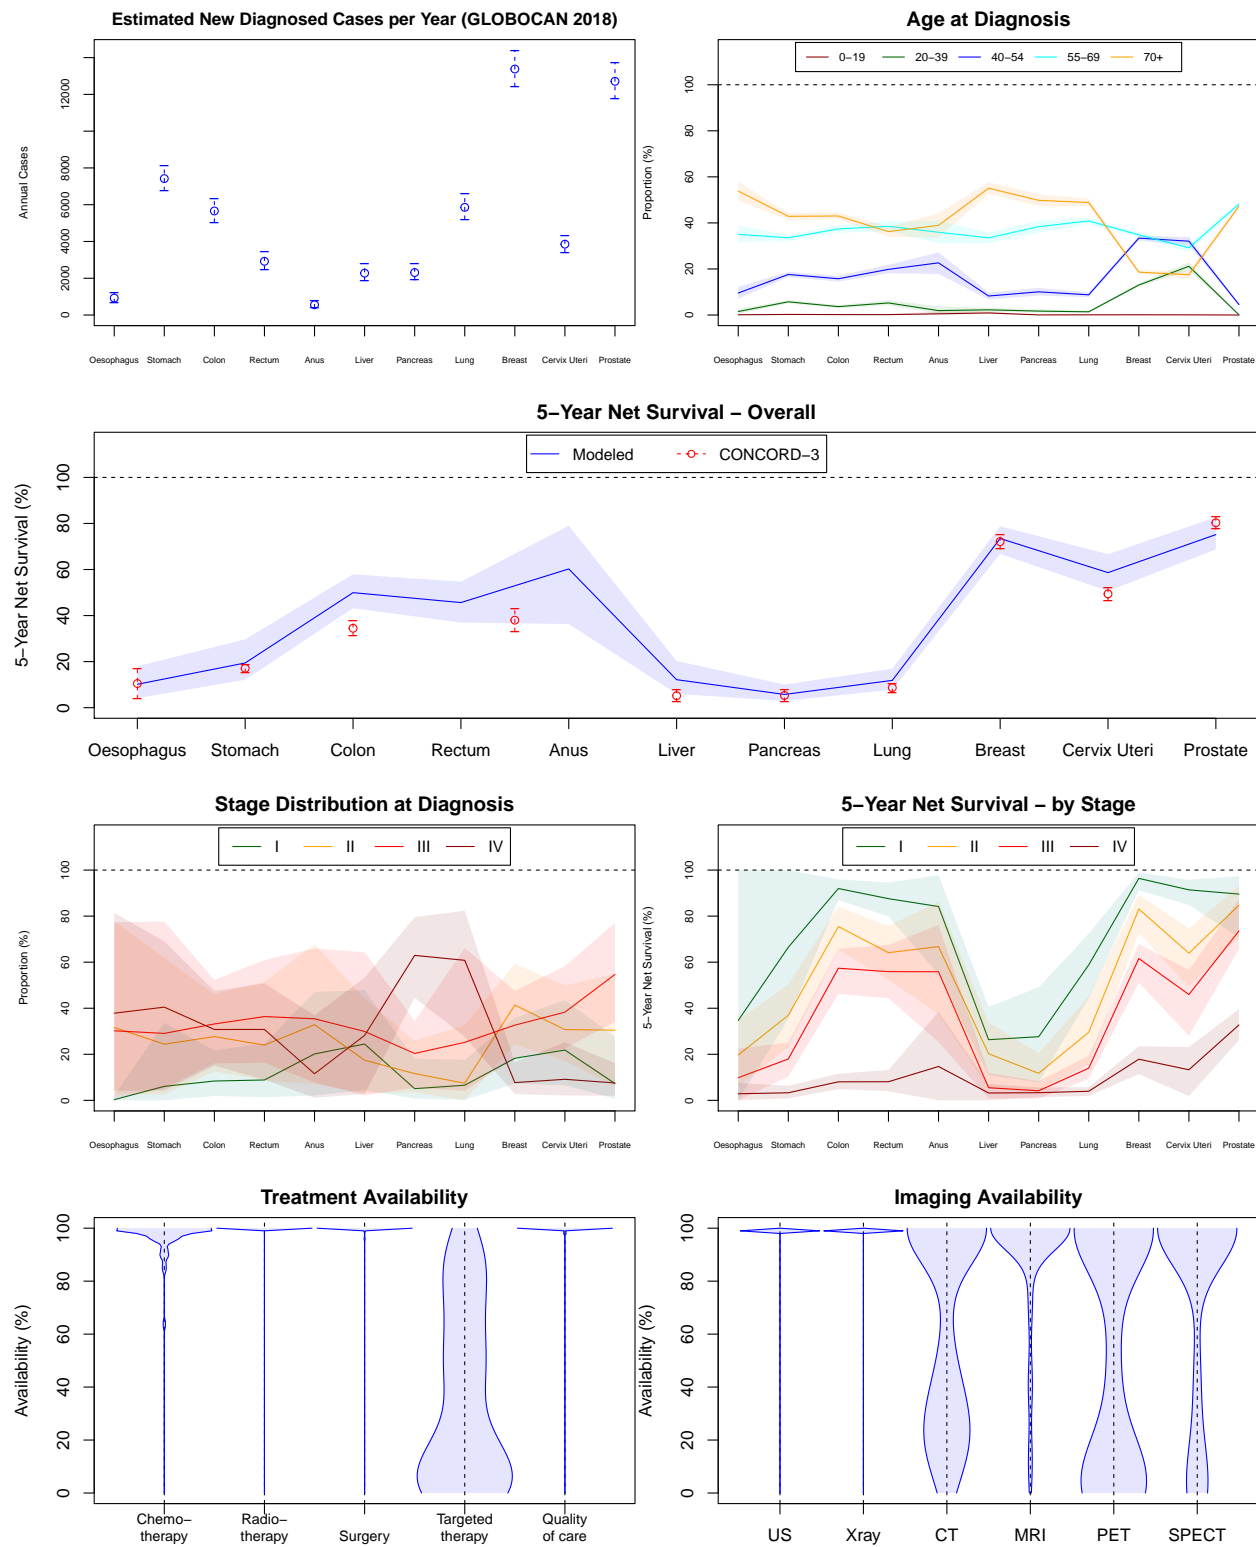

# Comoros

| ISO Code | Region         | Area   | Income Group |
|----------|----------------|--------|--------------|
| COM      | Eastern Africa | Africa | Low income   |

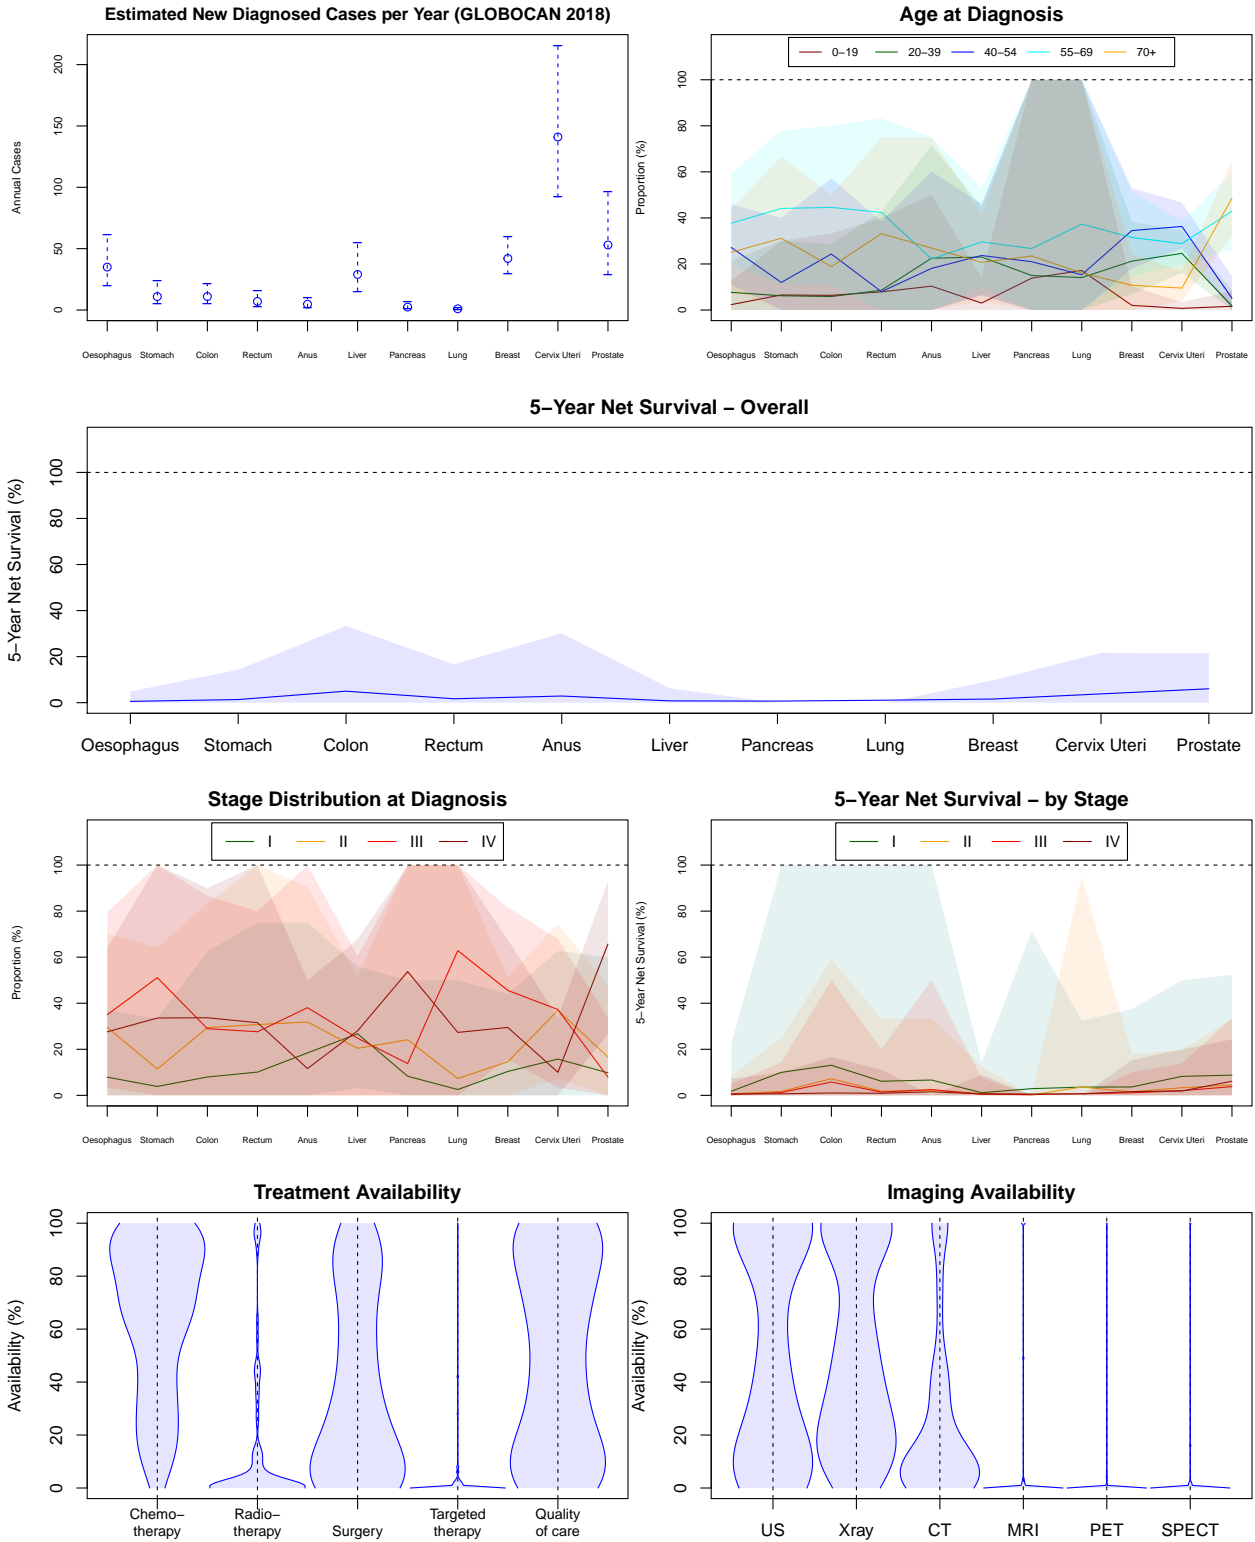

# Congo

| ISO Code | Region        | Area   | Income Group        |
|----------|---------------|--------|---------------------|
| COG      | Middle Africa | Africa | Lower middle income |

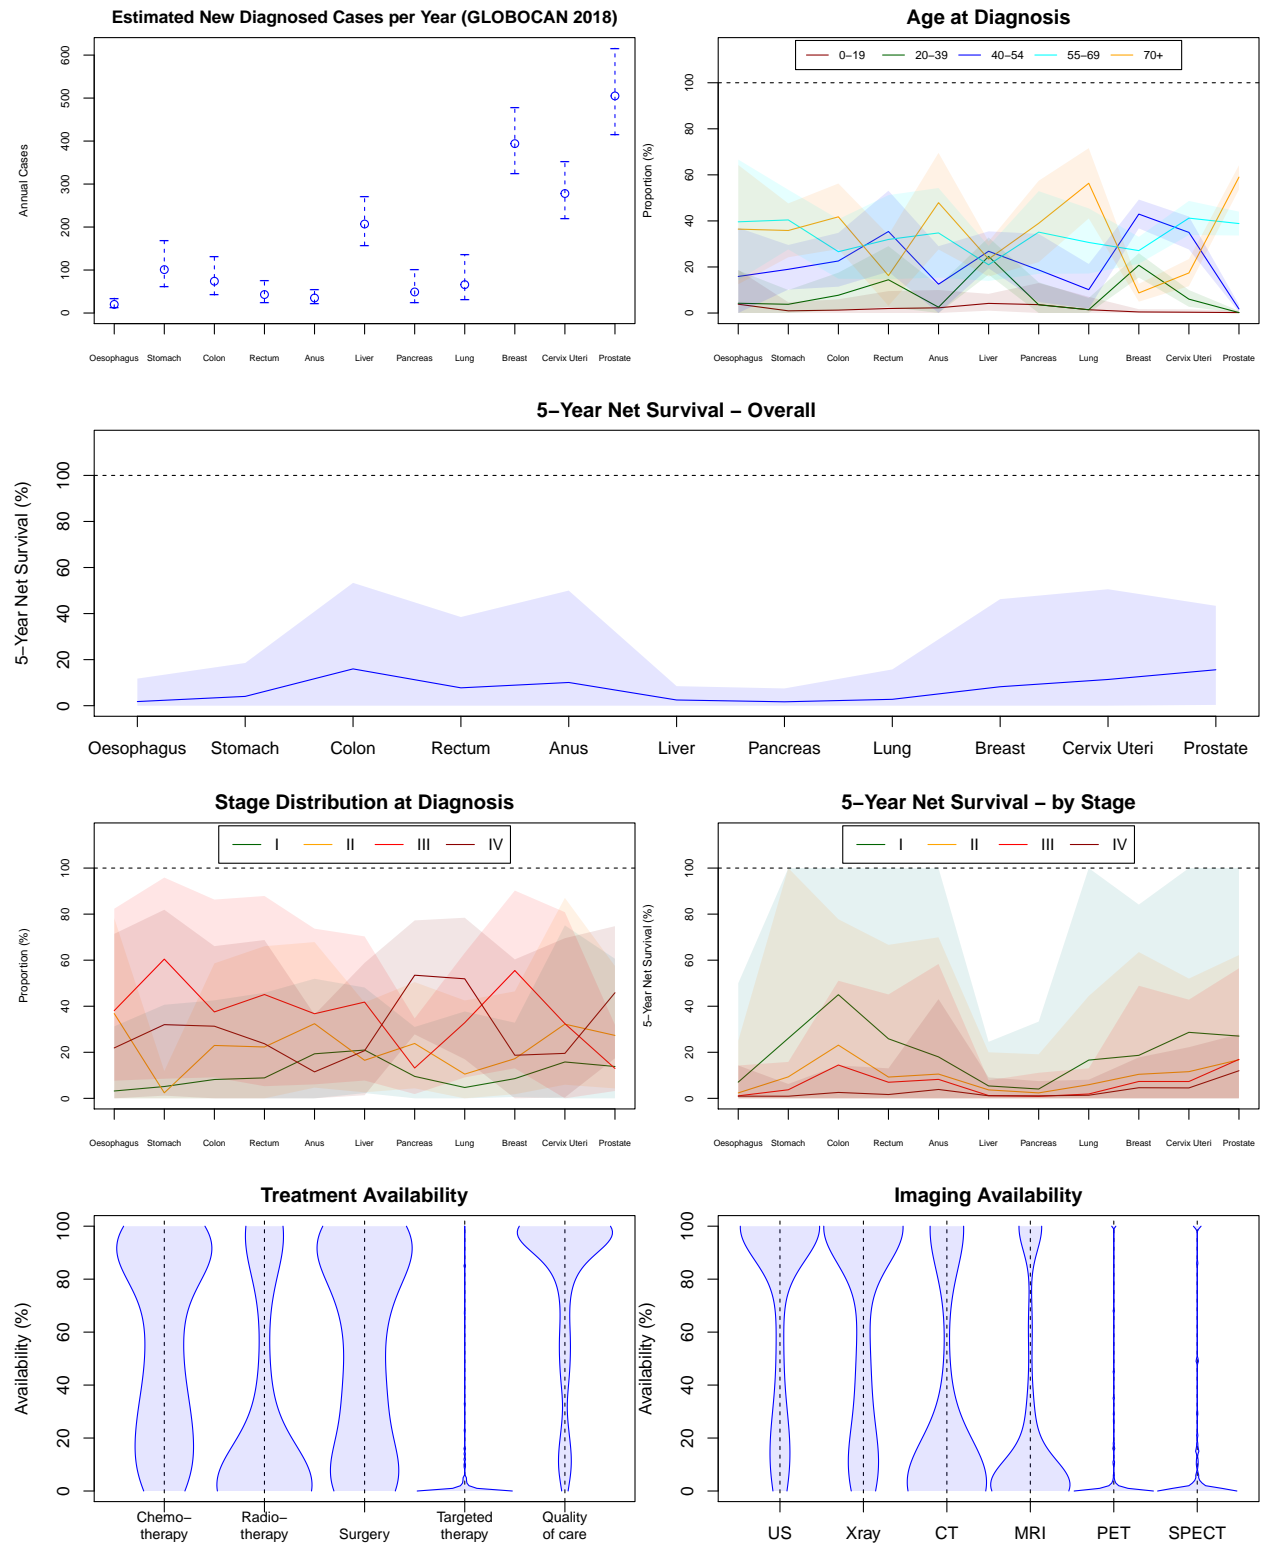

# Costa Rica

| ISO Code | Region          | Area                            | Income Group        |
|----------|-----------------|---------------------------------|---------------------|
| CRI      | Central America | Latin America and the Caribbean | Upper middle income |

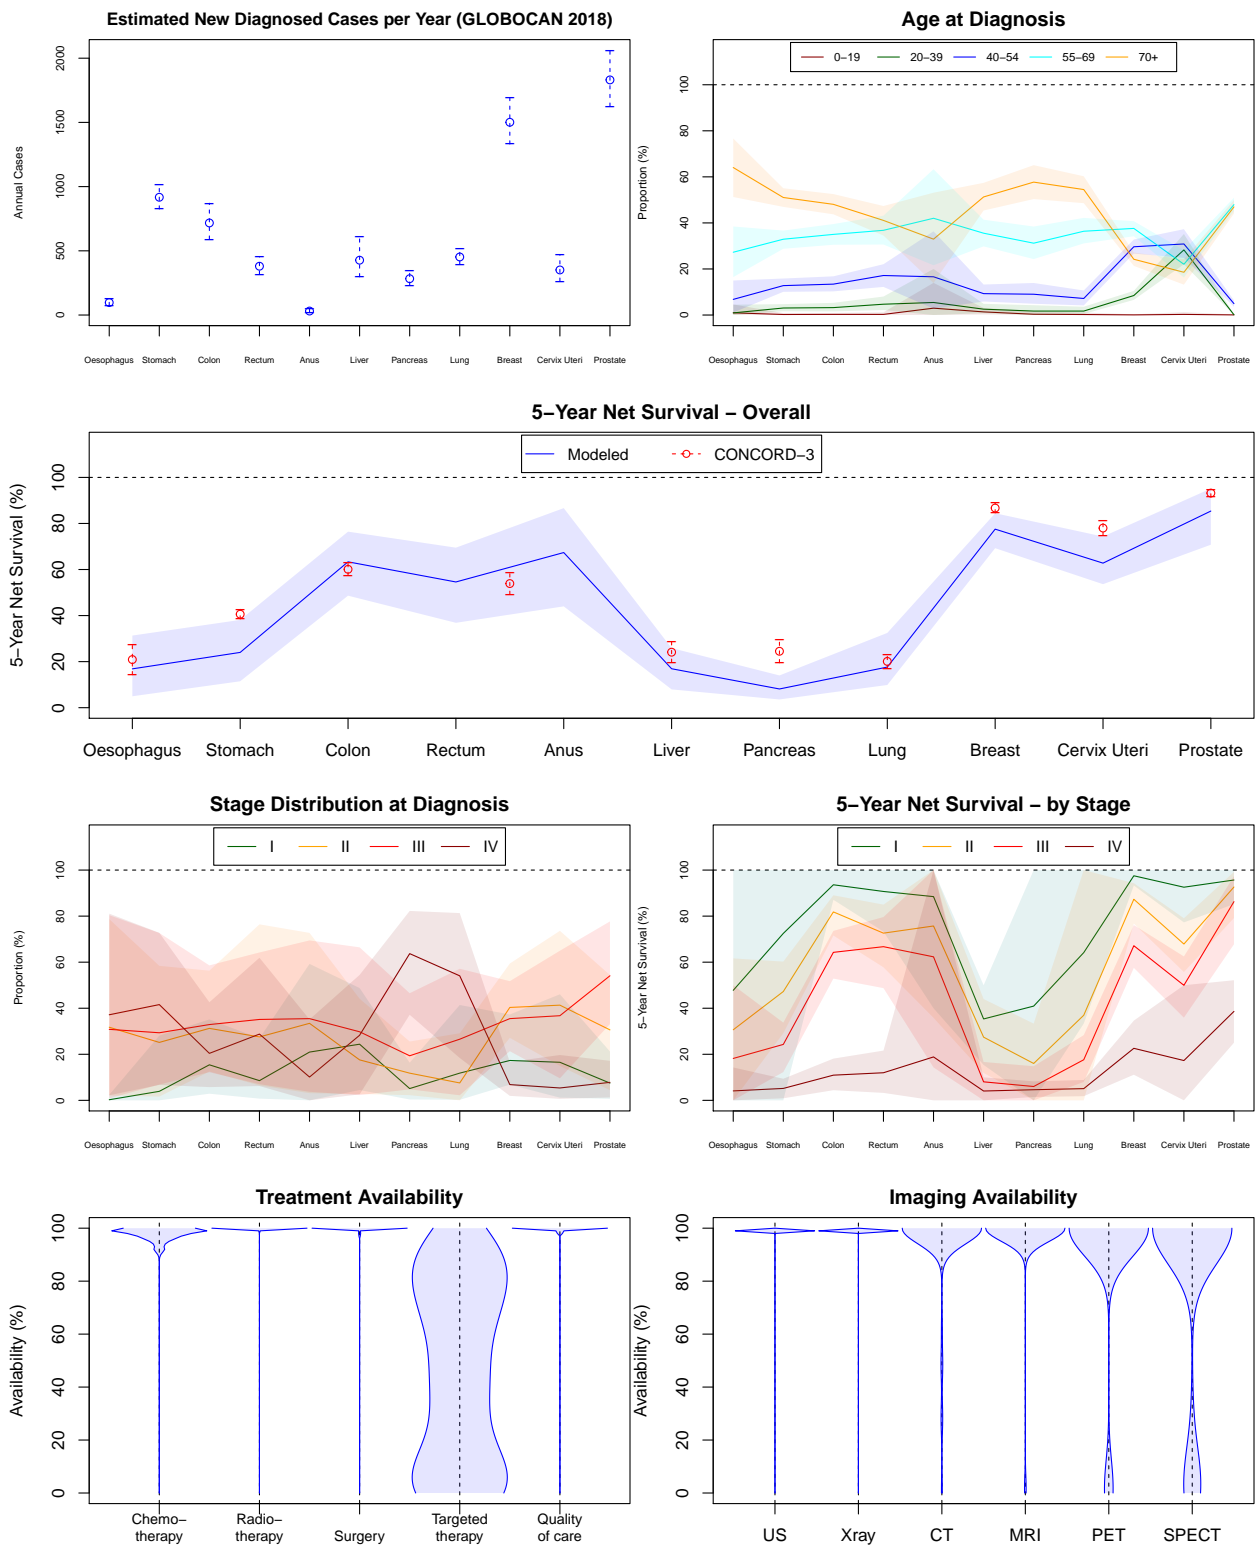



# Côte d'Ivoire

| ISO Code | Region         | Area   | Income Group        |
|----------|----------------|--------|---------------------|
| CIV      | Western Africa | Africa | Lower middle income |

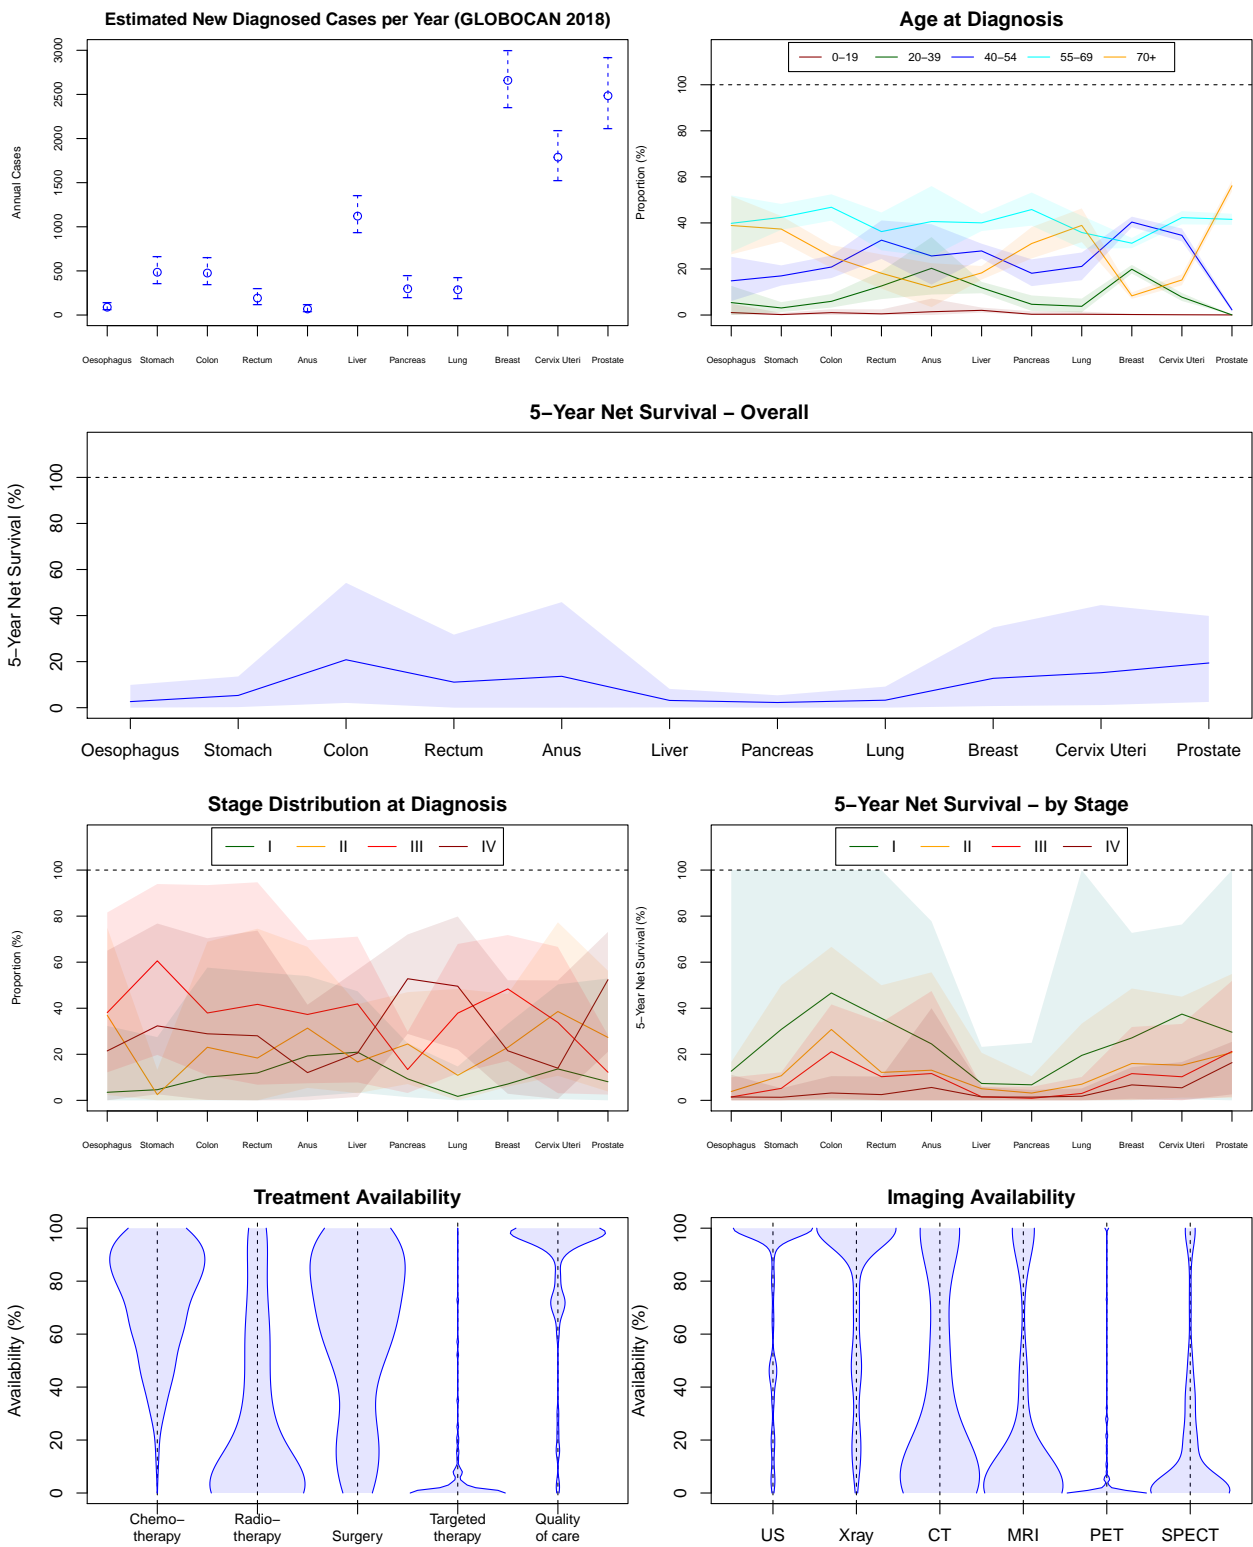

# Croatia

| ISO Code | Region          | Area   | Income Group |
|----------|-----------------|--------|--------------|
| HRV      | Southern Europe | Europe | High income  |

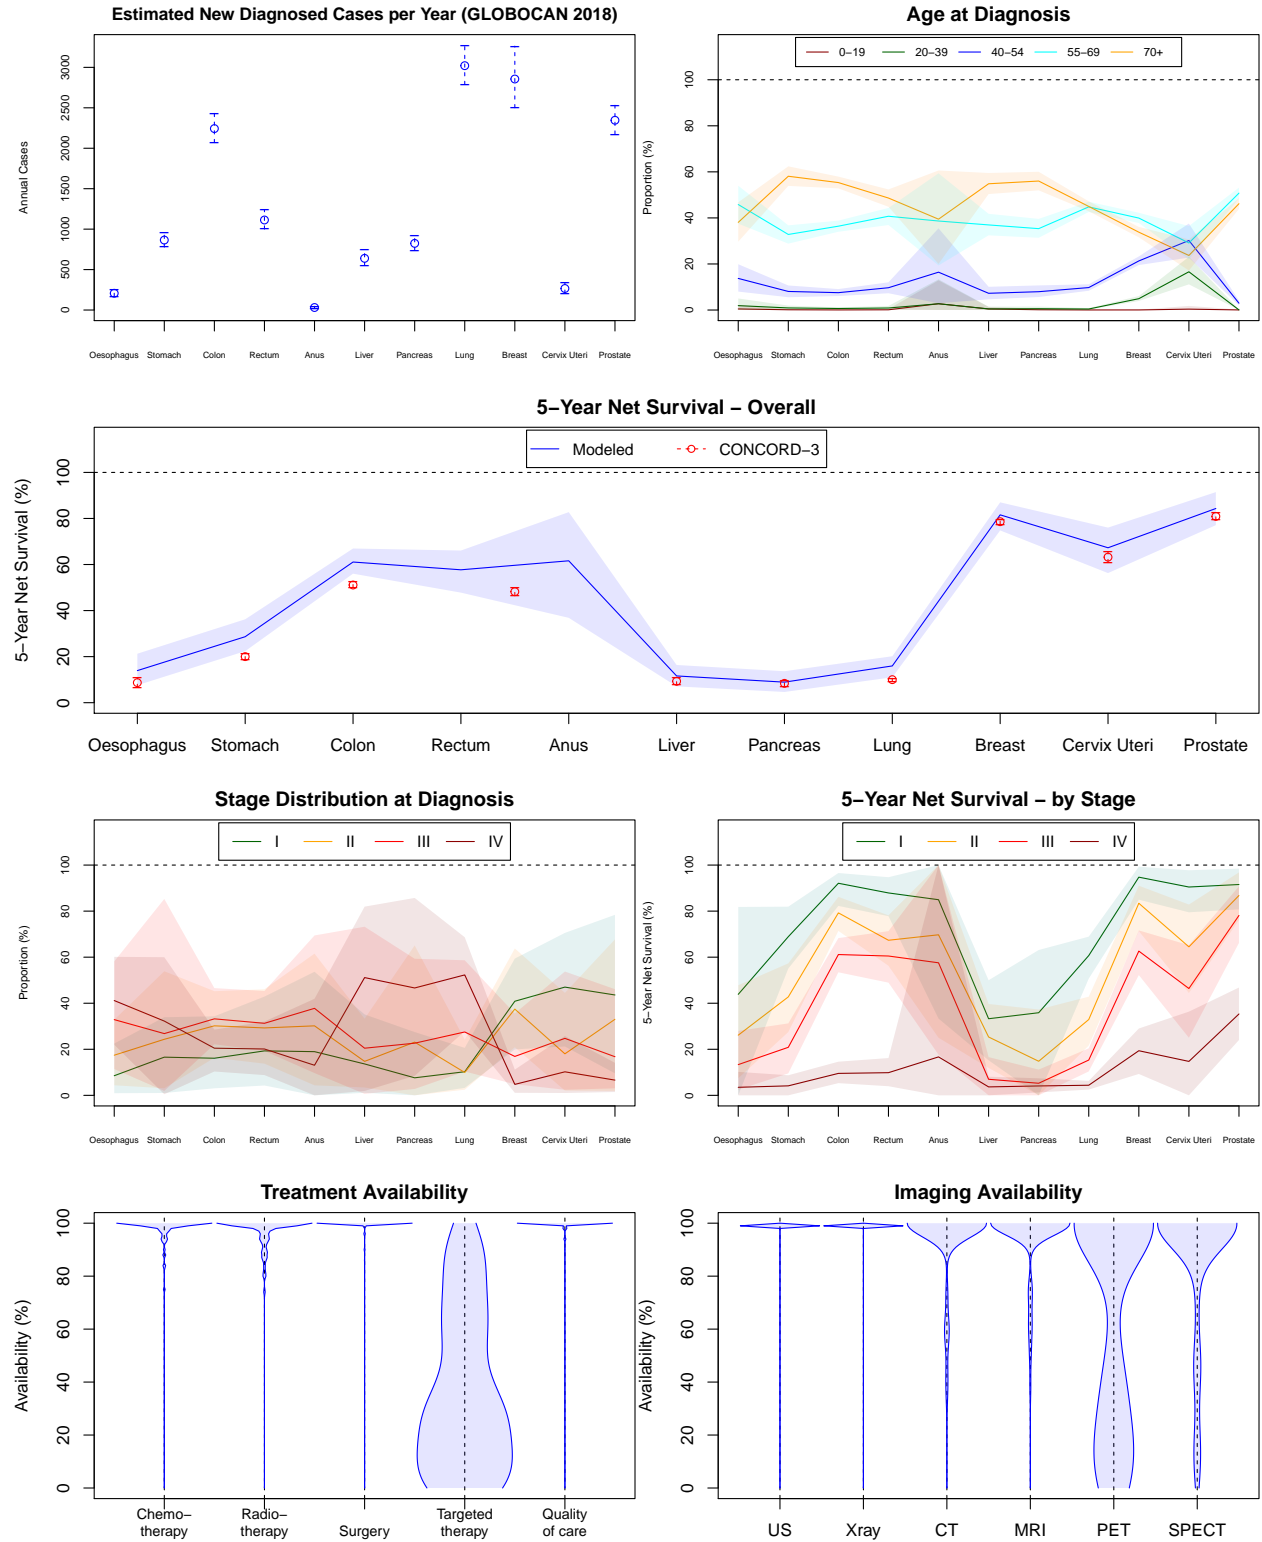

# Cuba

| ISO Code | Region    | Area                            | Income Group        |
|----------|-----------|---------------------------------|---------------------|
| CUB      | Caribbean | Latin America and the Caribbean | Upper middle income |

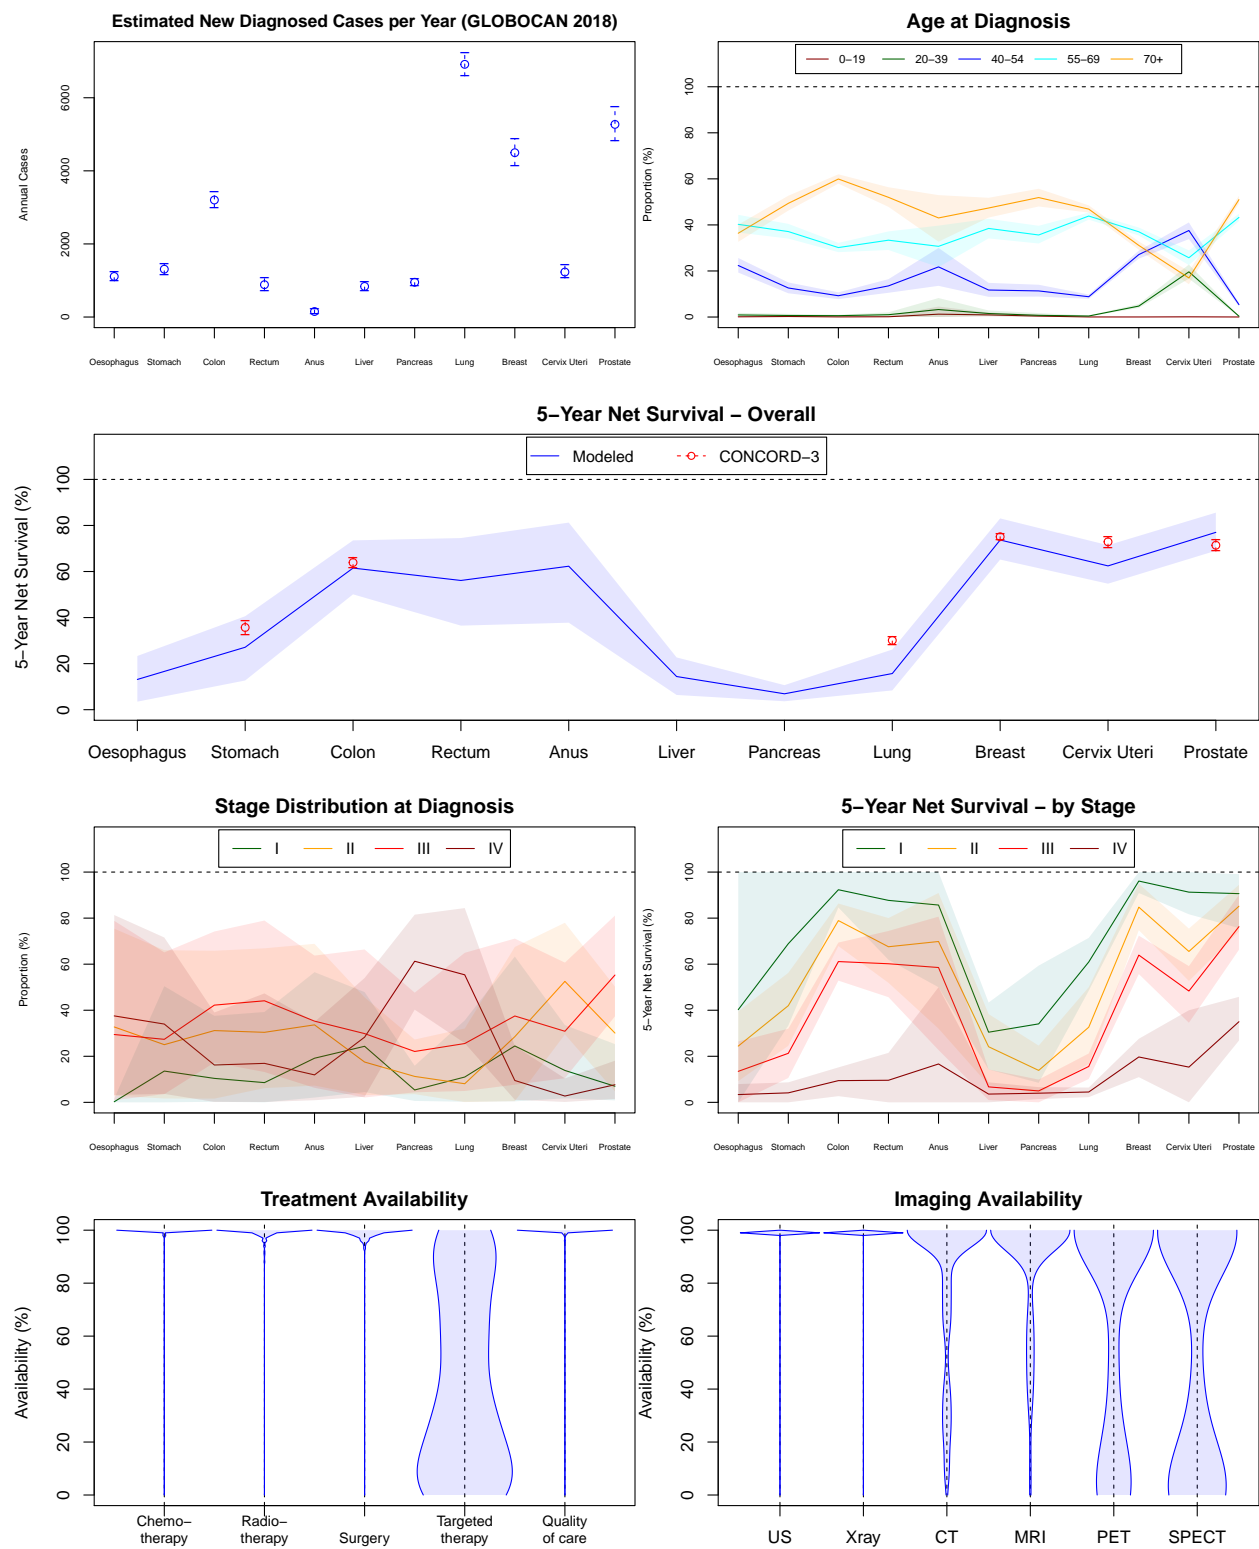

# Cyprus

| ISO Code | Region       | Area | Income Group |
|----------|--------------|------|--------------|
| CYP      | Western Asia | Asia | High income  |

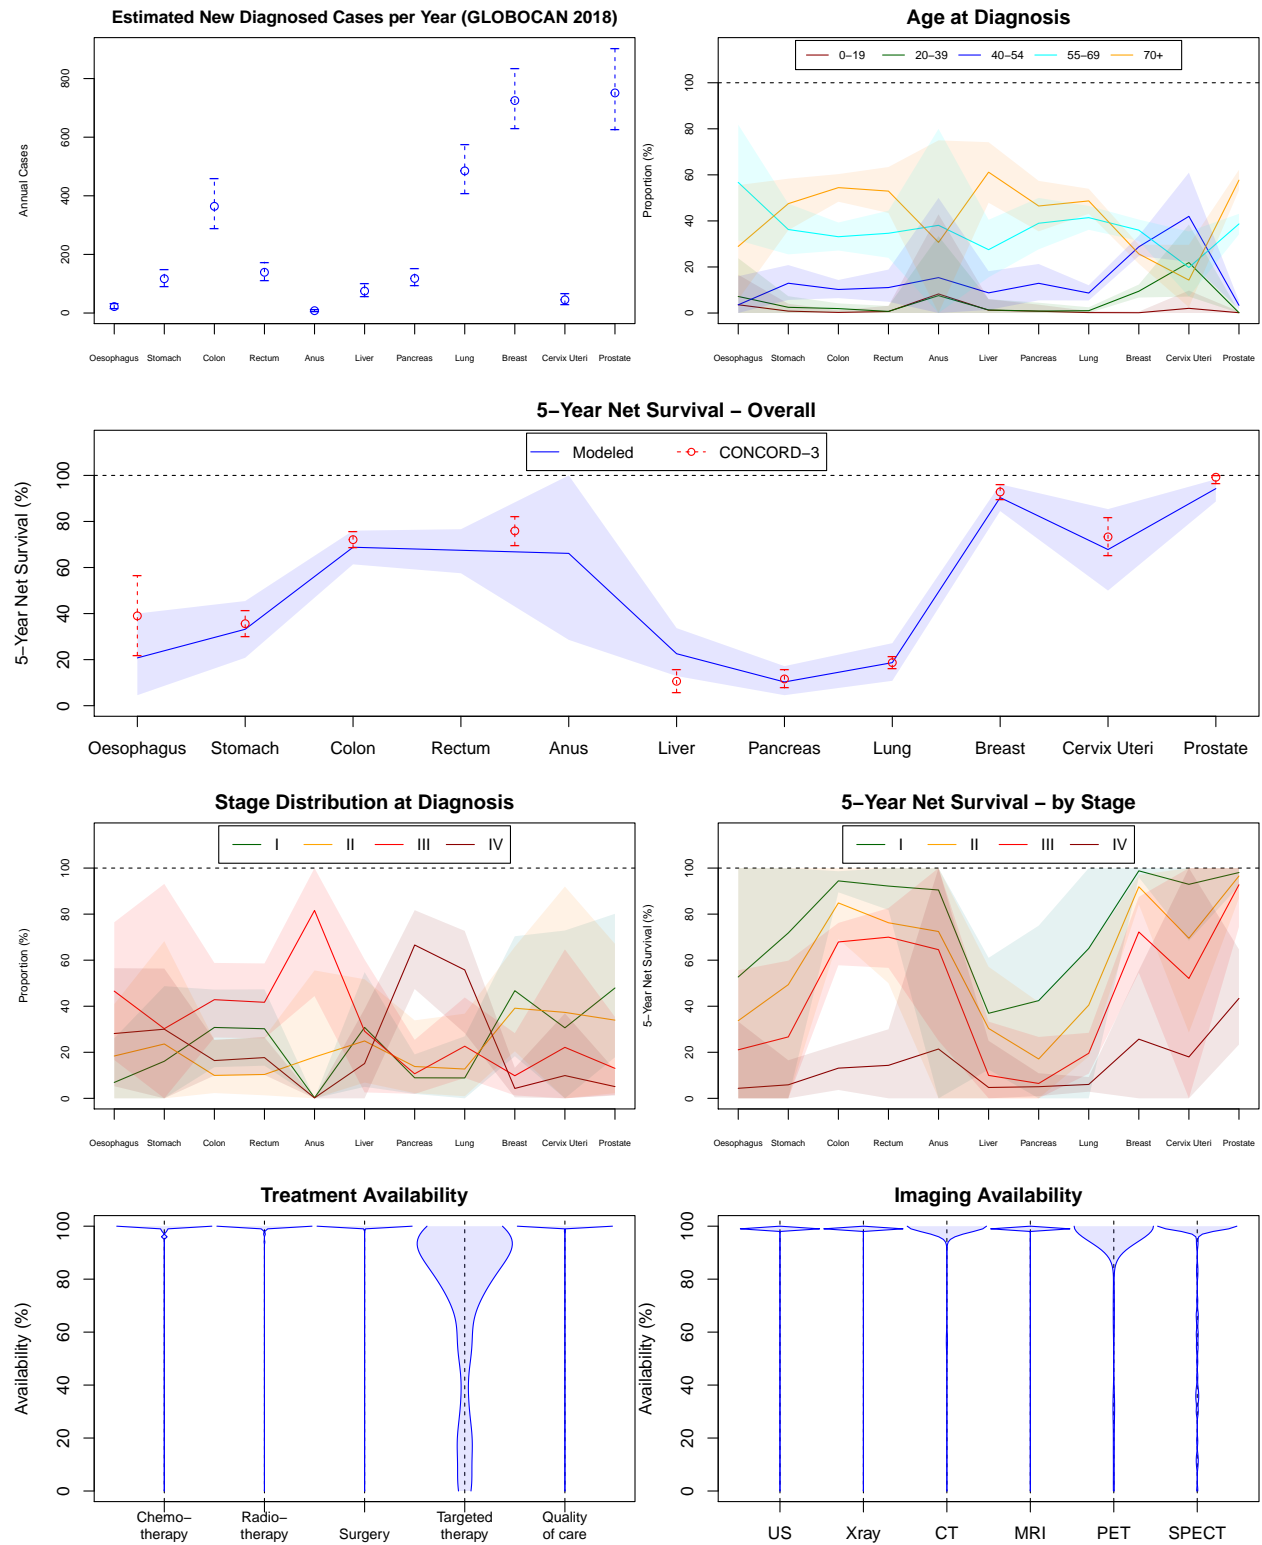

# Czechia

| ISO Code | Region         | Area   | Income Group |
|----------|----------------|--------|--------------|
| CZE      | Eastern Europe | Europe | High income  |

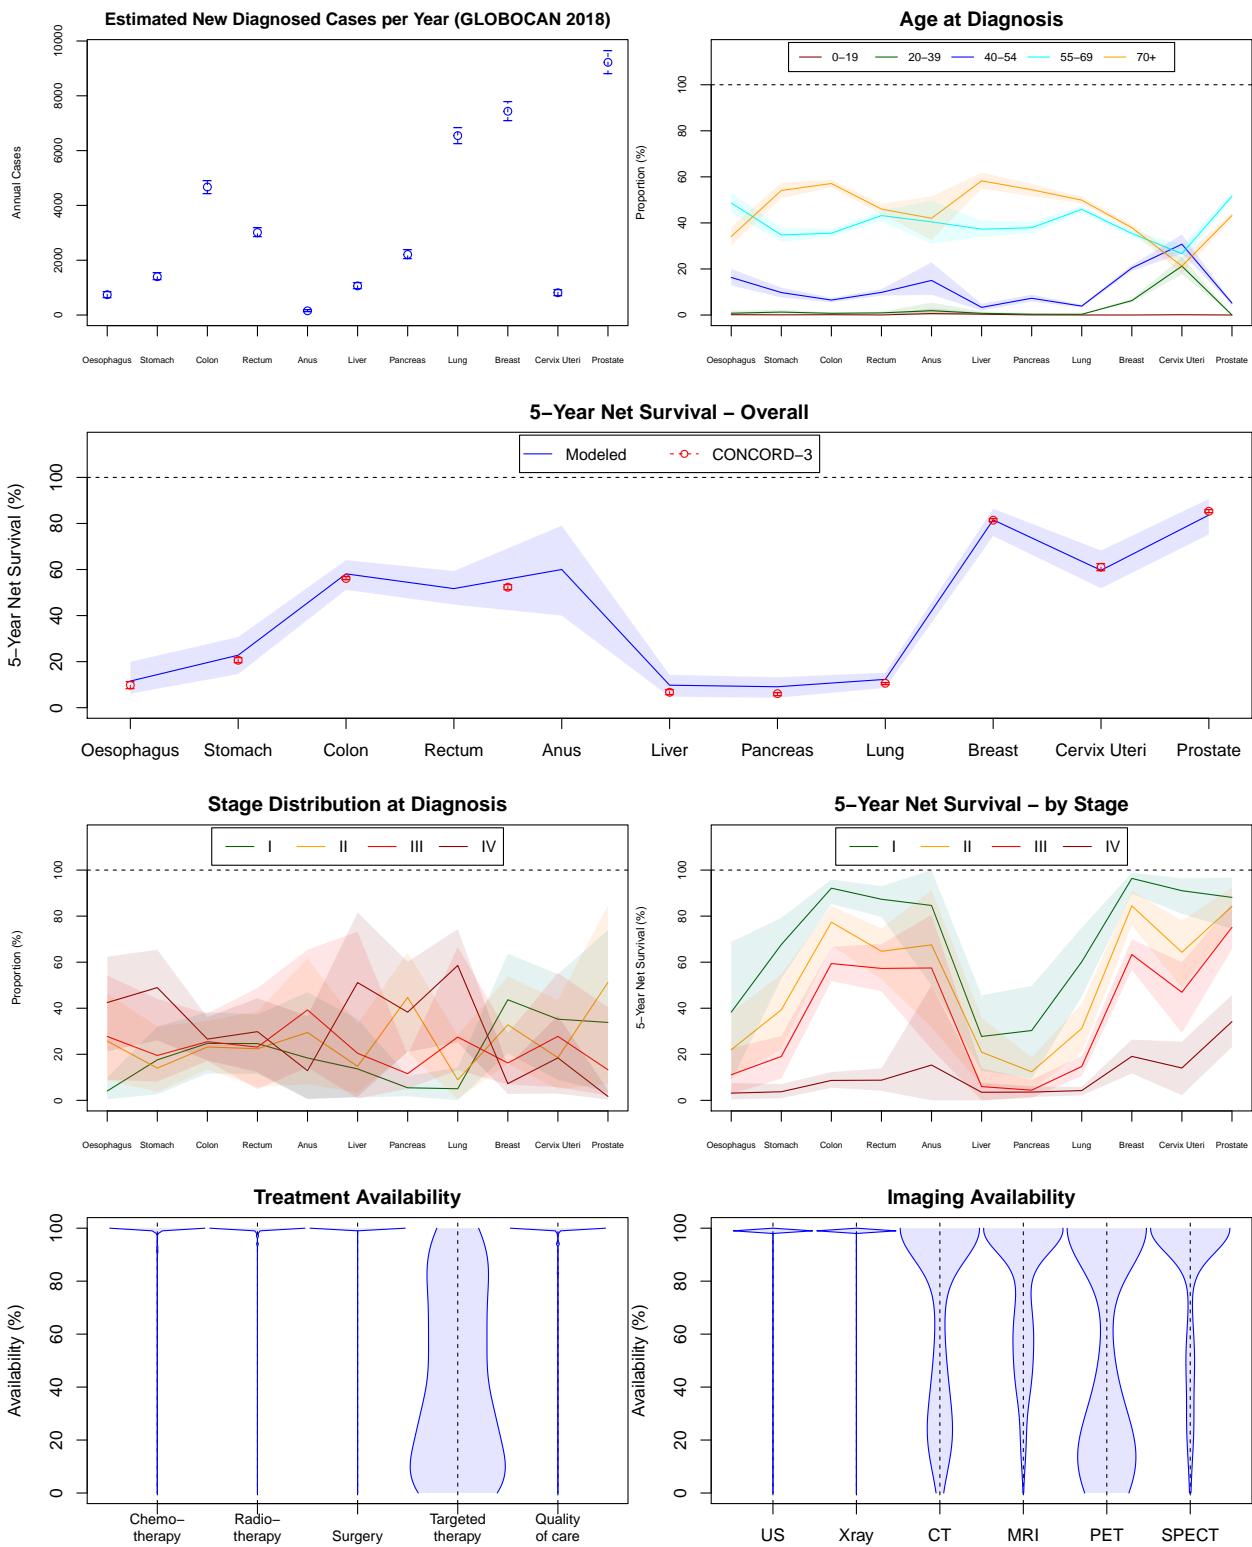

# Dem. People's Republic of Korea

| ISO Code | Region       | Area | Income Group |
|----------|--------------|------|--------------|
| PRK      | Eastern Asia | Asia | Low income   |

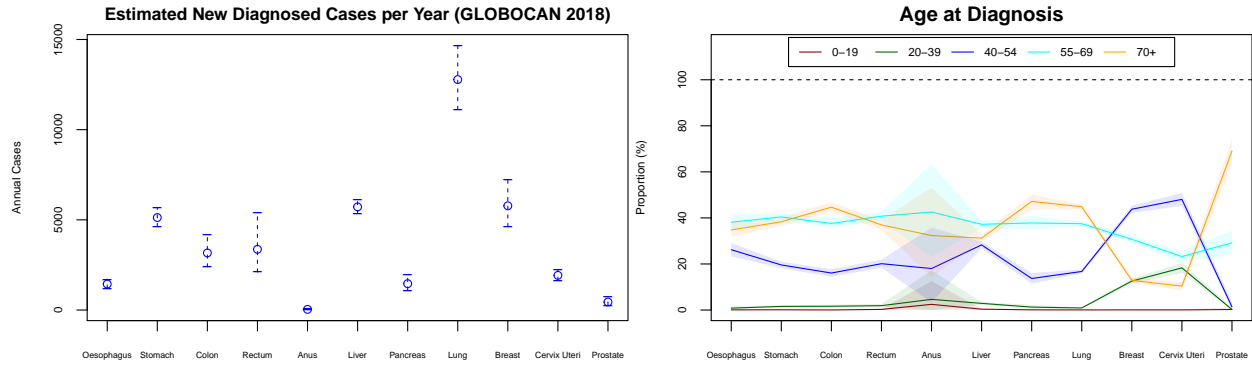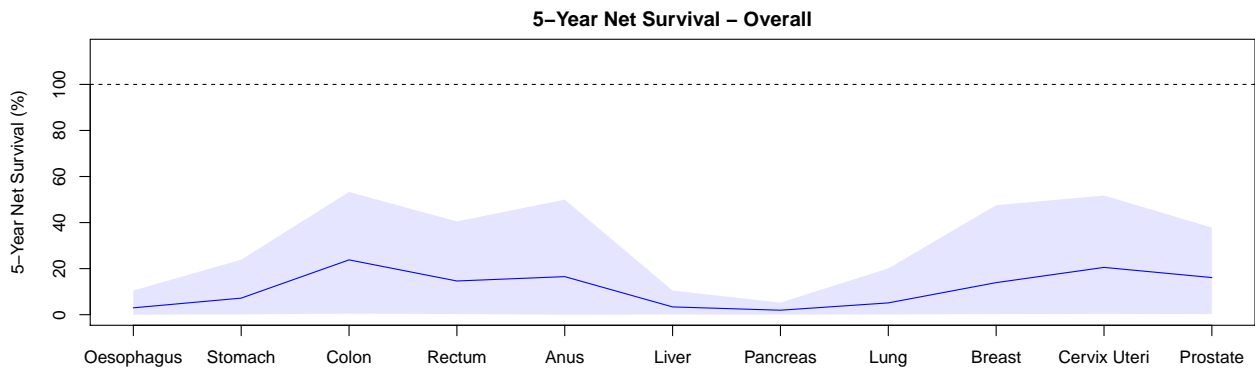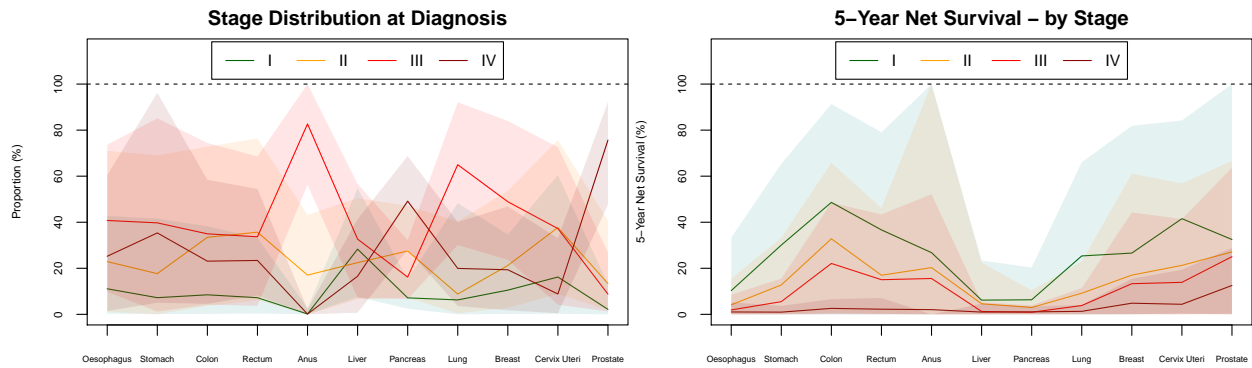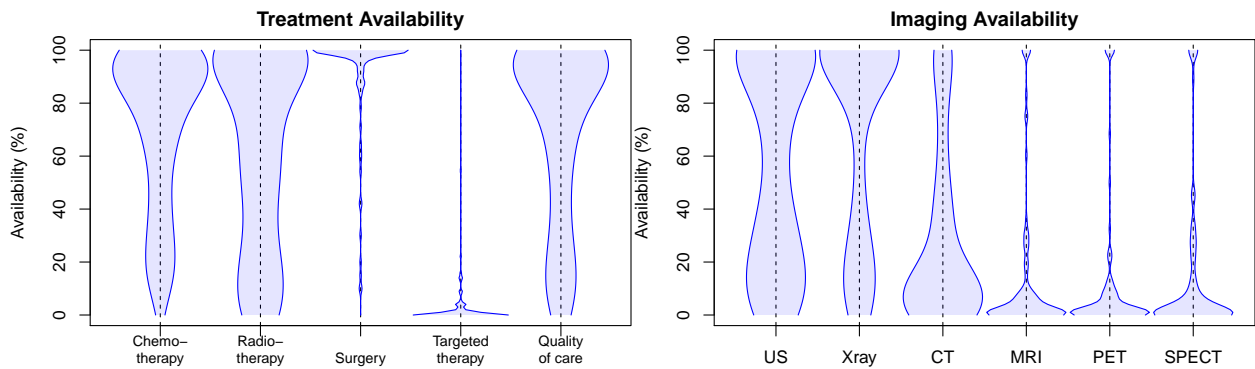

# Democratic Republic of the Congo

| ISO Code | Region        | Area   | Income Group |
|----------|---------------|--------|--------------|
| COD      | Middle Africa | Africa | Low income   |

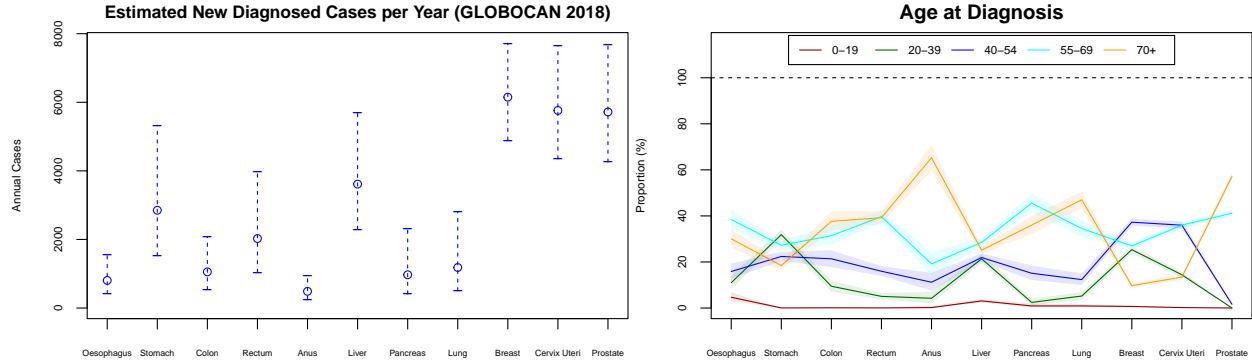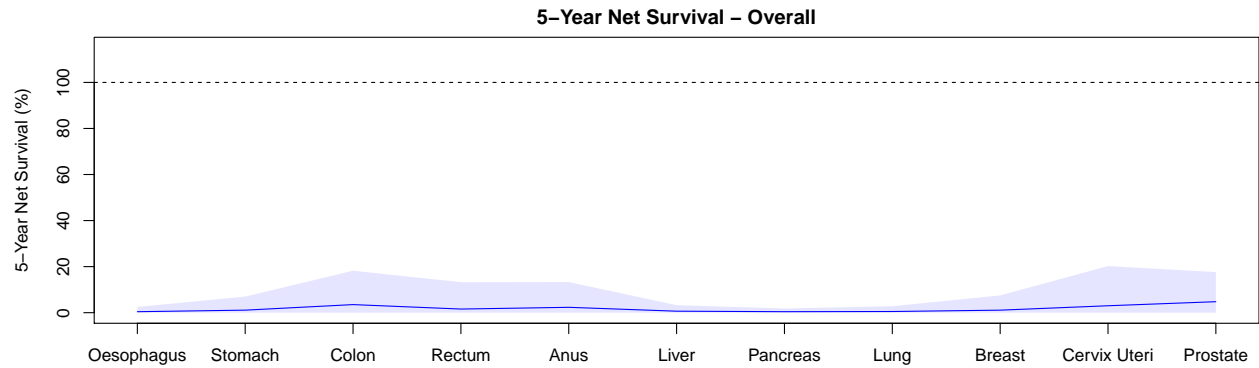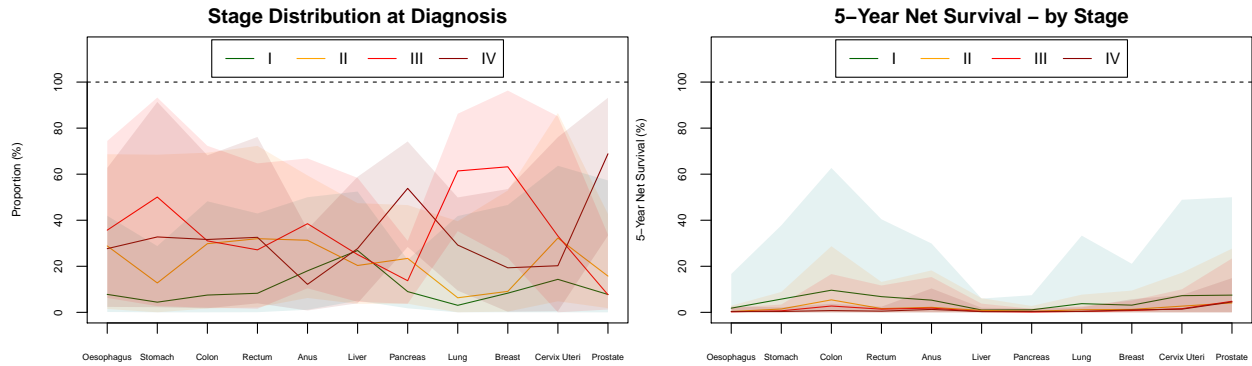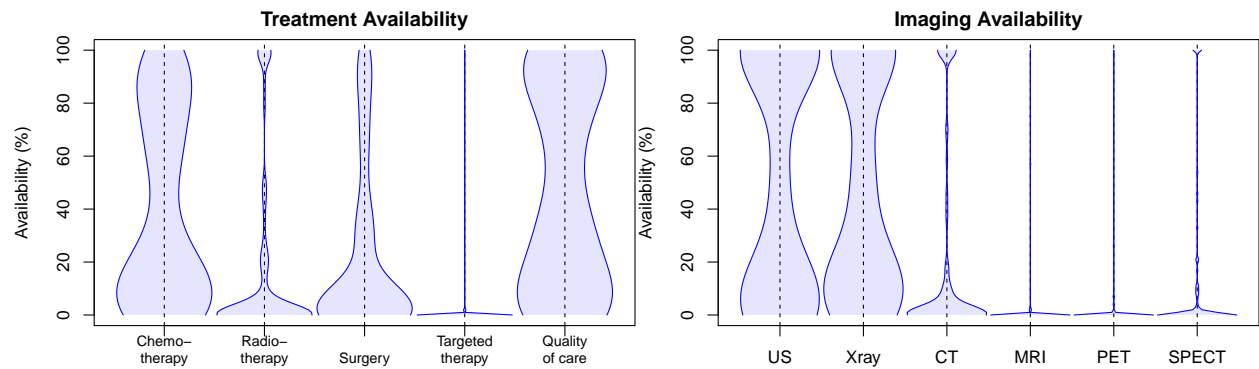

# Denmark

| ISO Code | Region          | Area   | Income Group |
|----------|-----------------|--------|--------------|
| DNK      | Northern Europe | Europe | High income  |

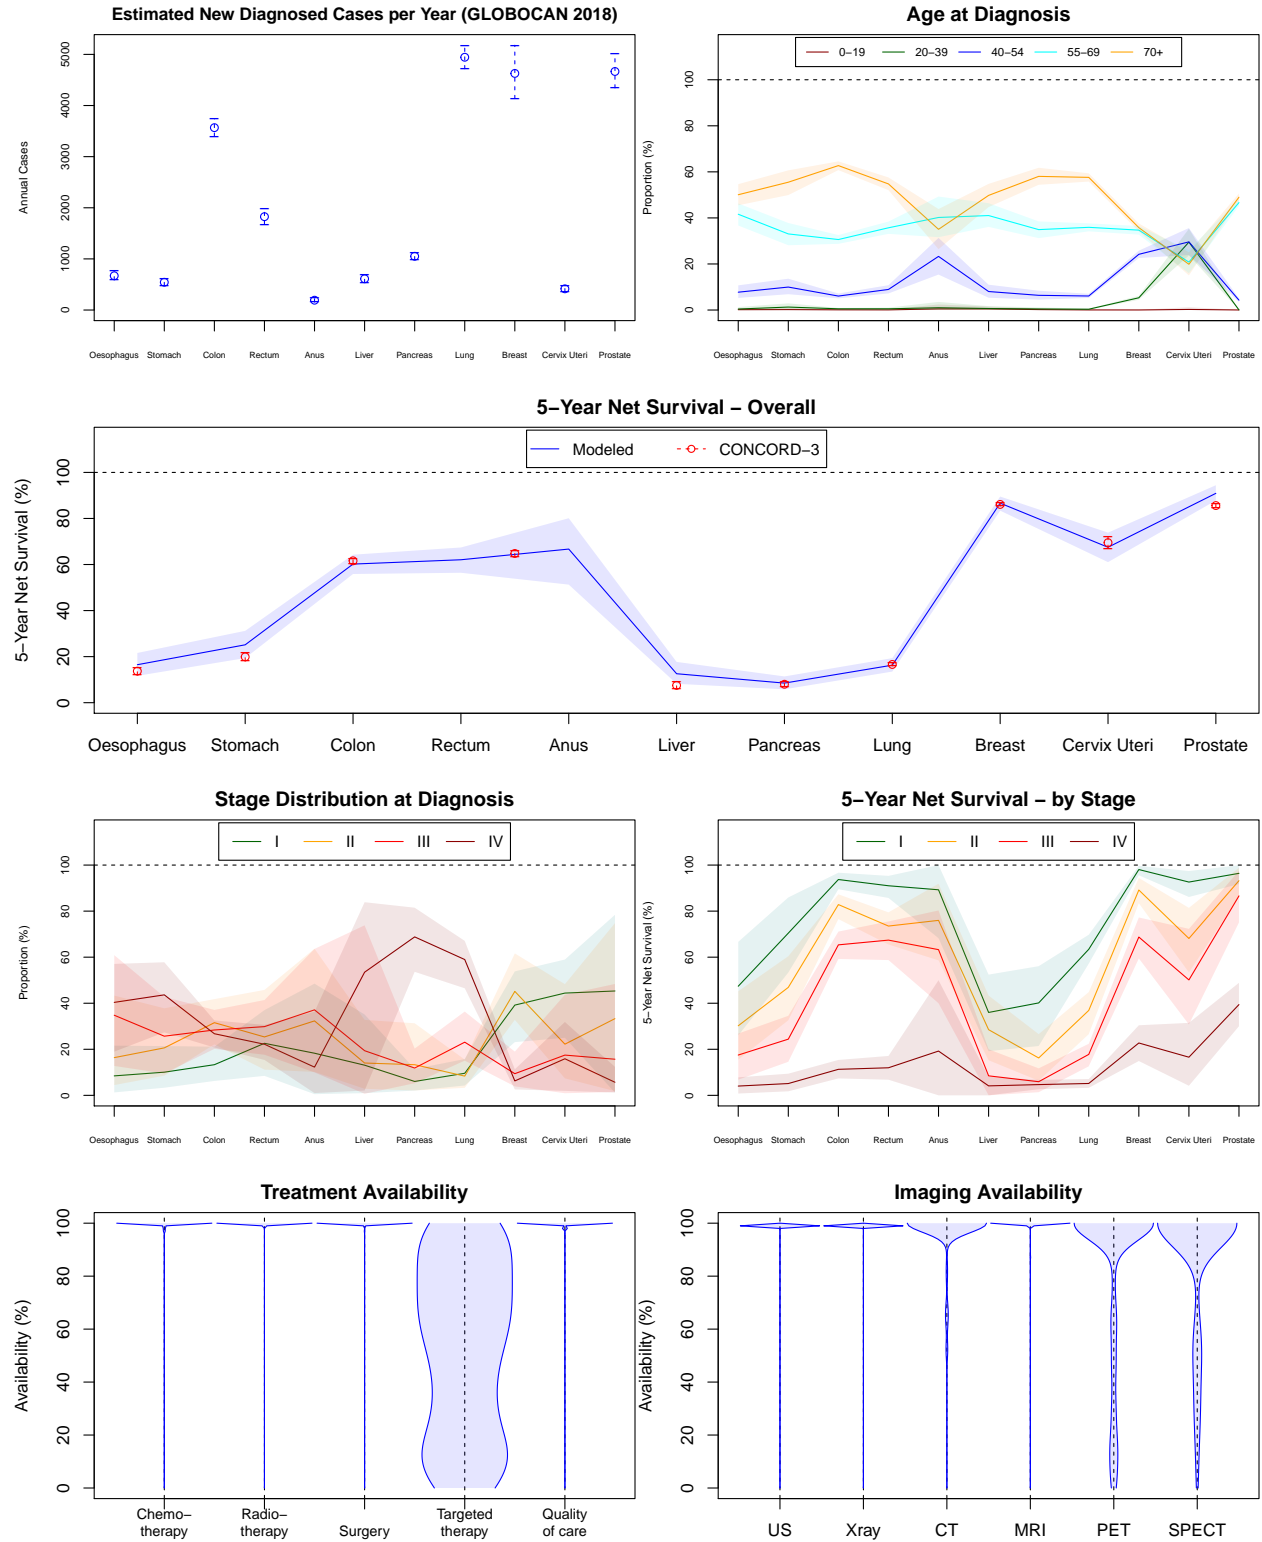



# Djibouti

| ISO Code | Region         | Area   | Income Group        |
|----------|----------------|--------|---------------------|
| DJI      | Eastern Africa | Africa | Lower middle income |

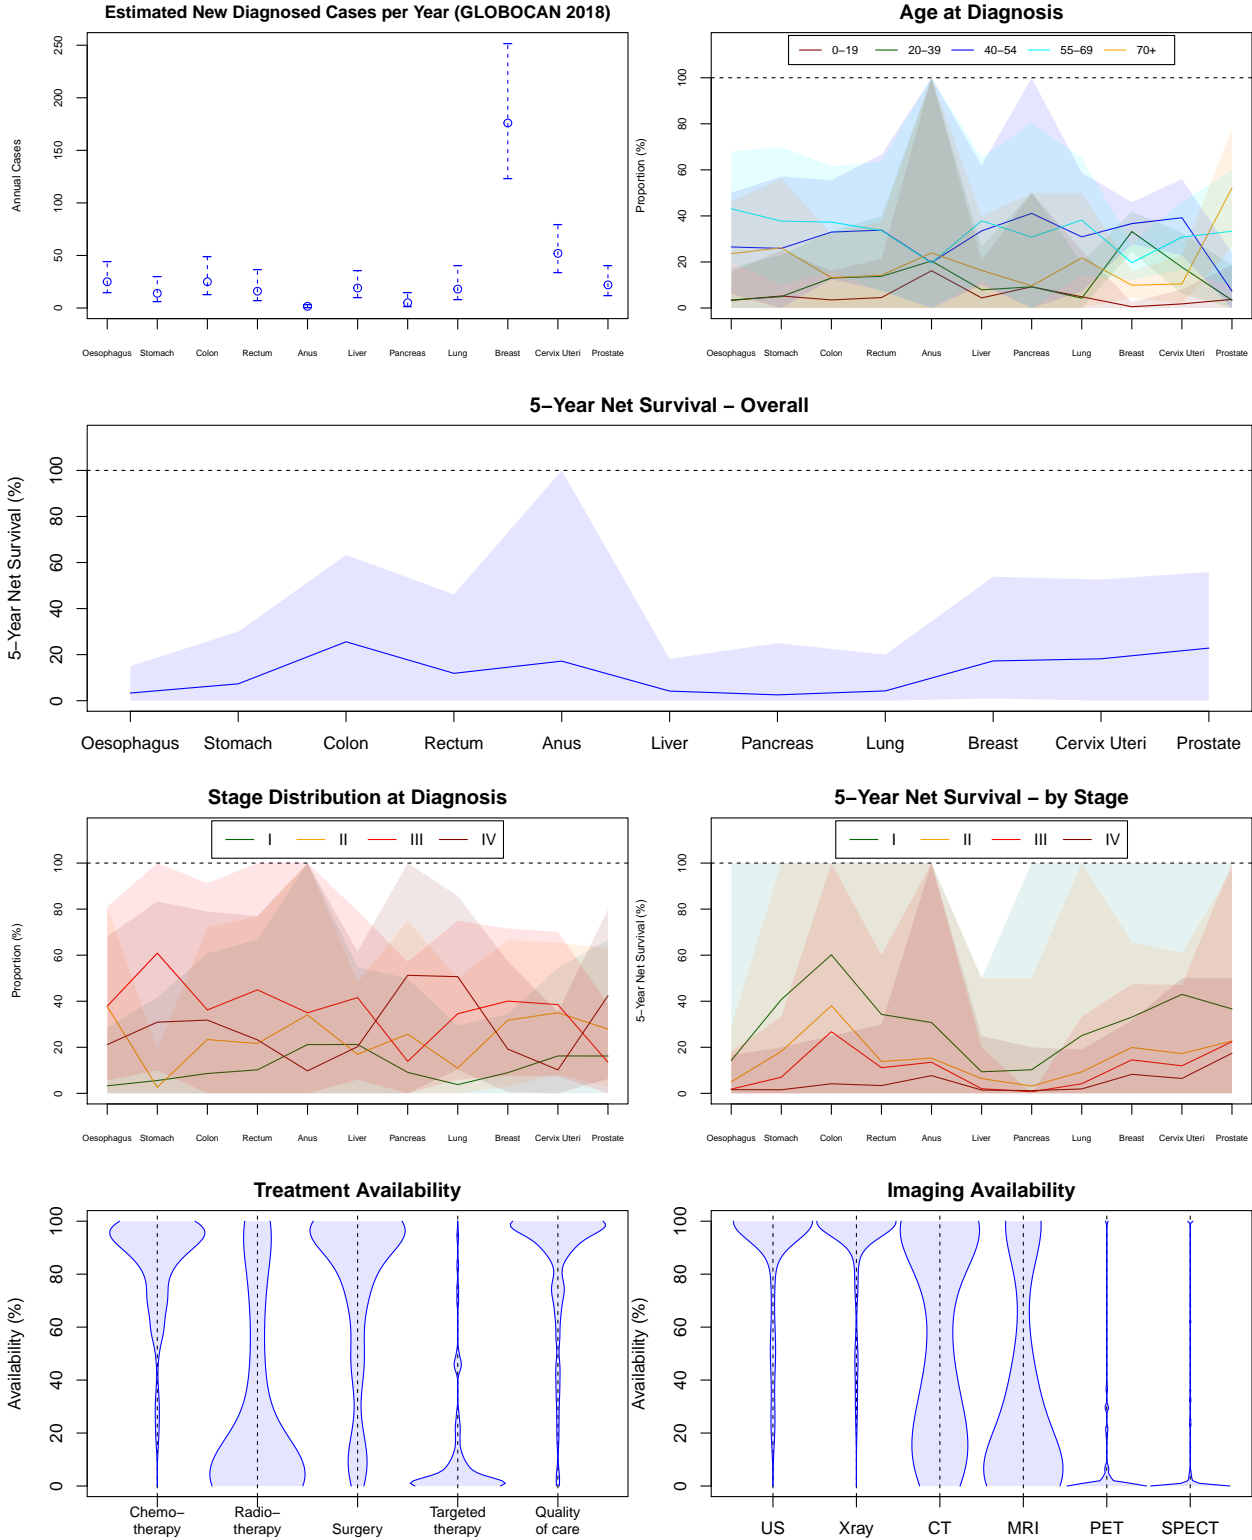

# Dominica

| ISO Code | Region    | Area                            | Income Group        |
|----------|-----------|---------------------------------|---------------------|
| DMA      | Caribbean | Latin America and the Caribbean | Upper middle income |

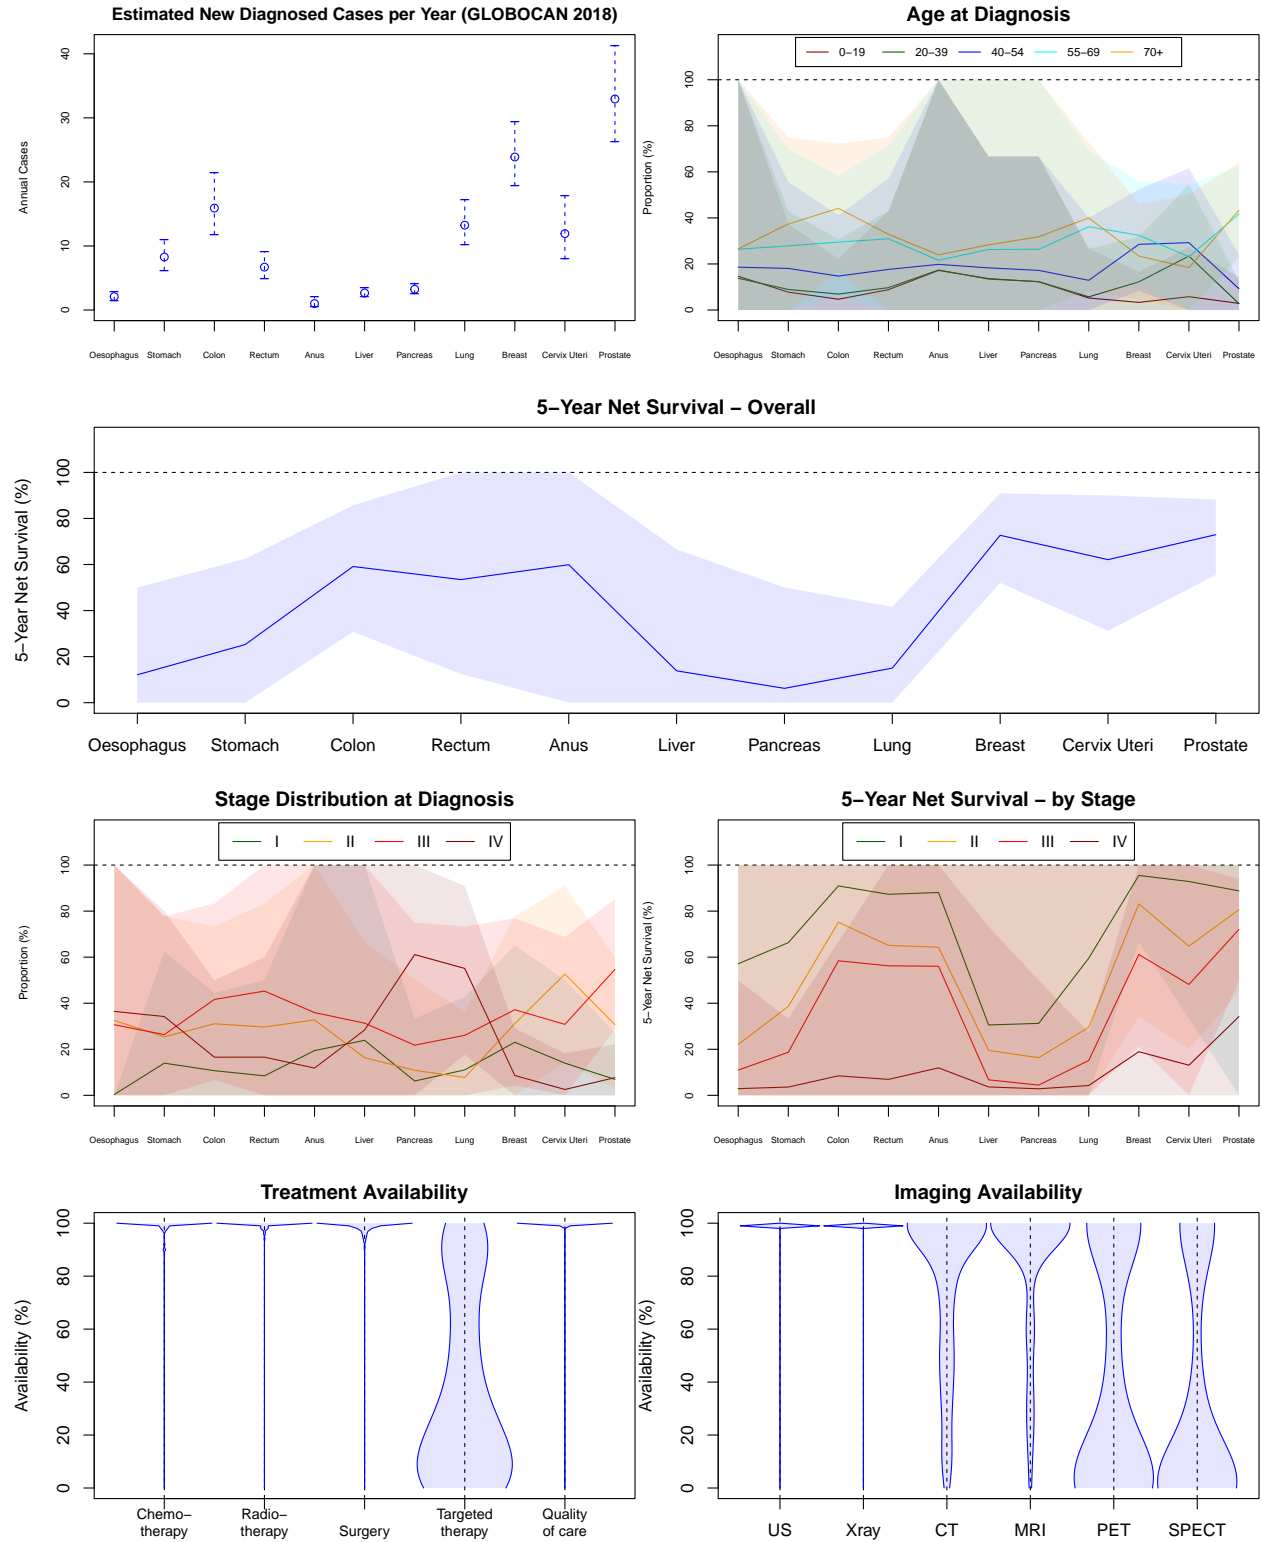

# Dominican Republic

| ISO Code | Region    | Area                            | Income Group        |
|----------|-----------|---------------------------------|---------------------|
| DOM      | Caribbean | Latin America and the Caribbean | Upper middle income |

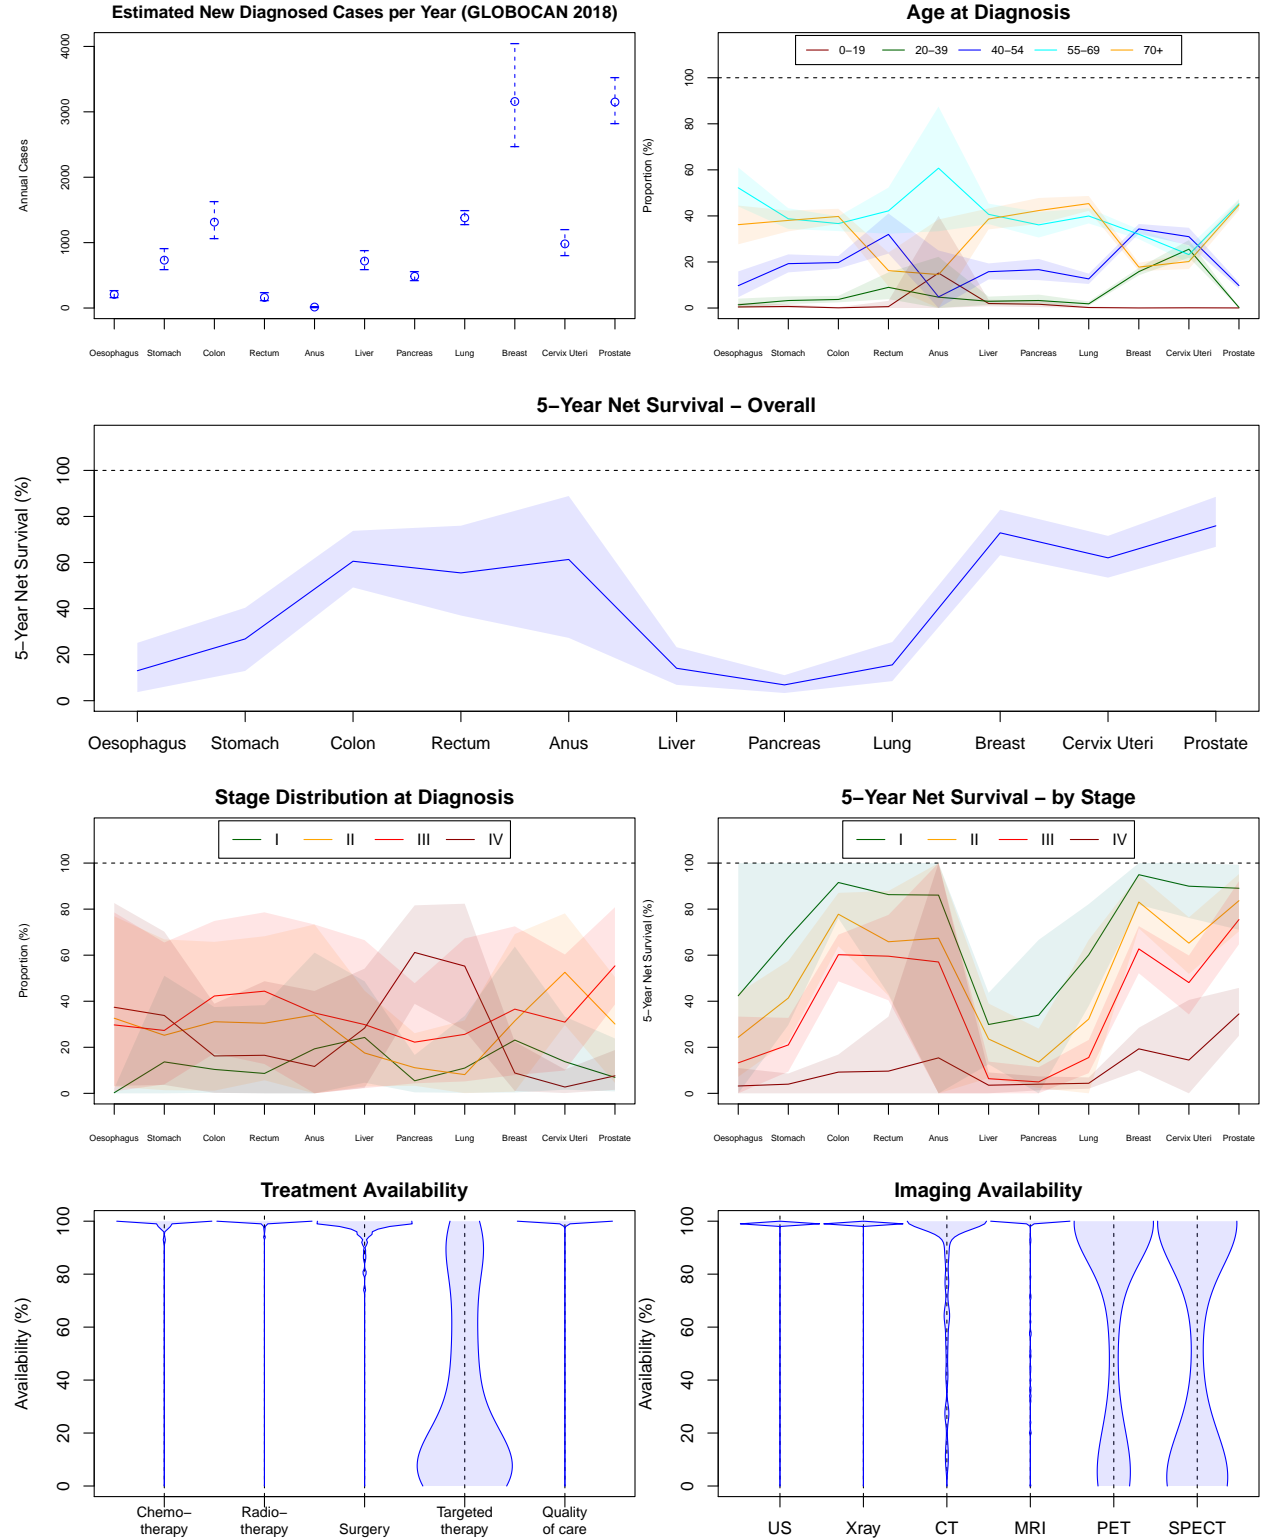

# Ecuador

| ISO Code | Region        | Area                            | Income Group        |
|----------|---------------|---------------------------------|---------------------|
| ECU      | South America | Latin America and the Caribbean | Upper middle income |

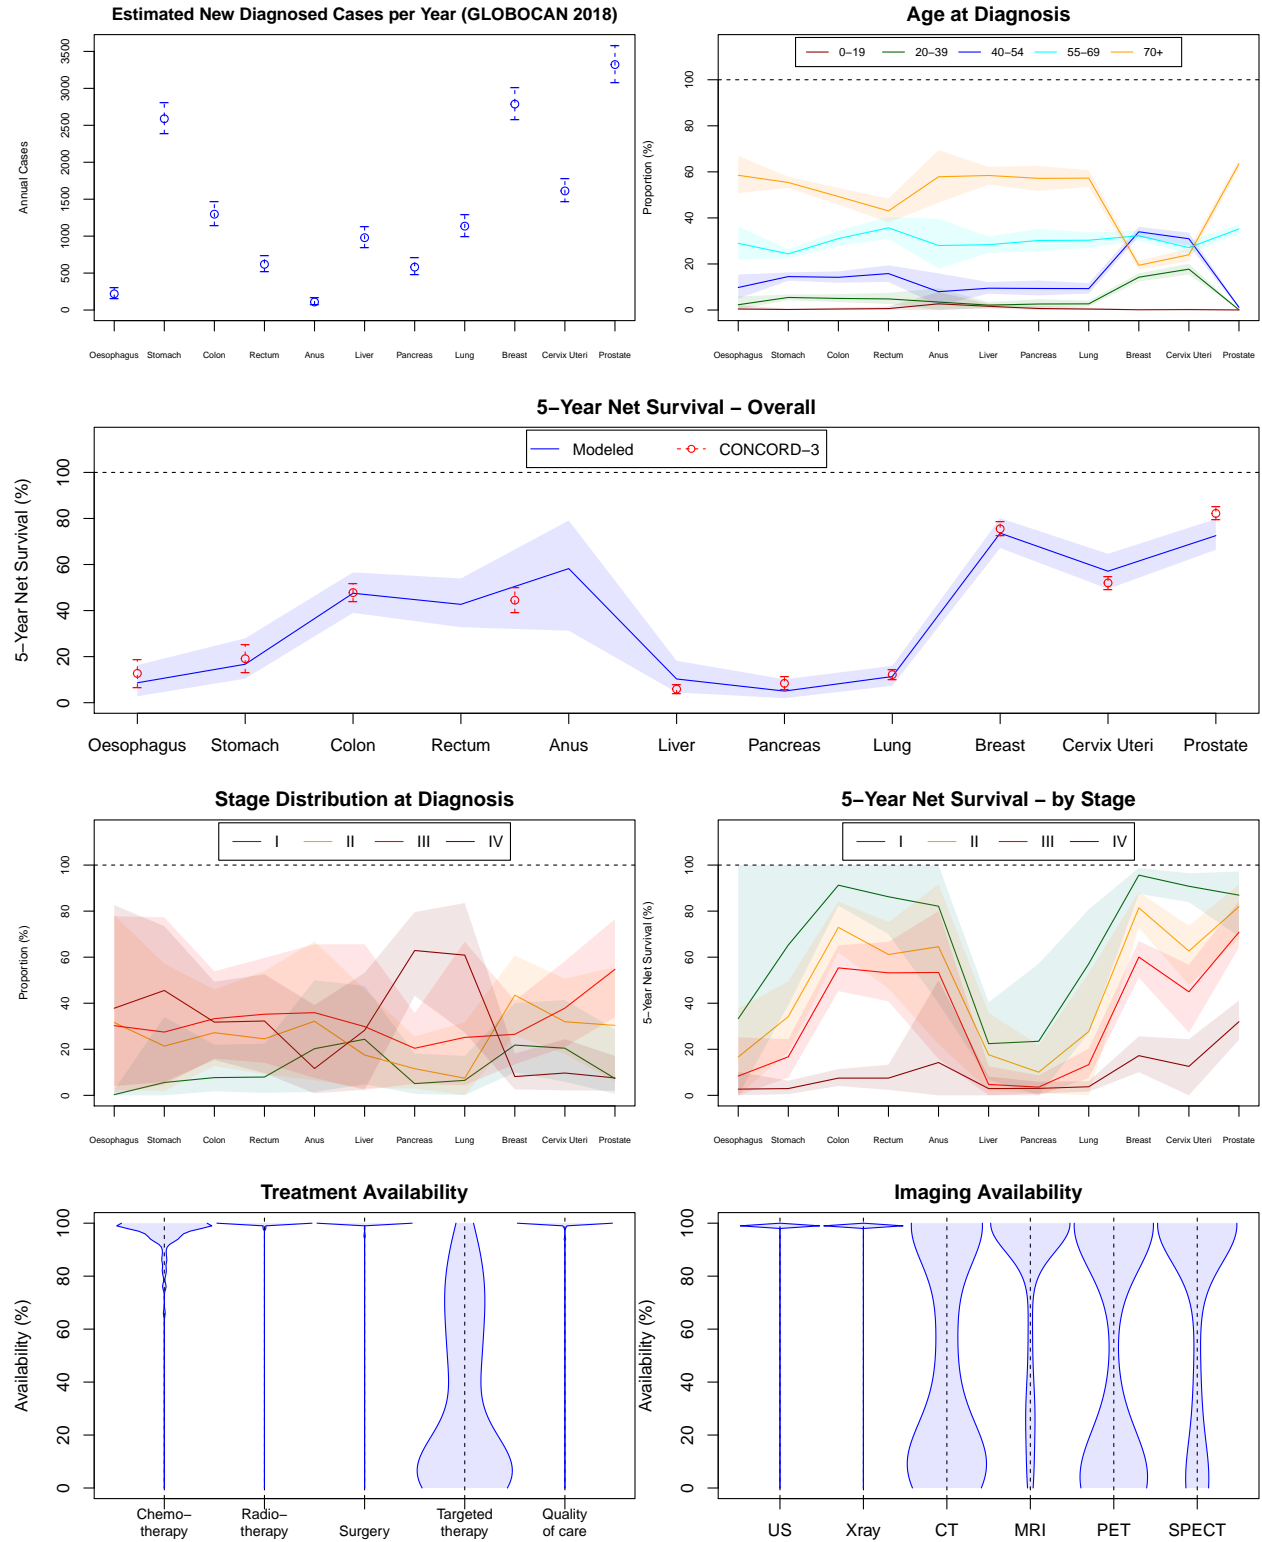

# Egypt

| ISO Code | Region          | Area   | Income Group        |
|----------|-----------------|--------|---------------------|
| EGY      | Northern Africa | Africa | Lower middle income |

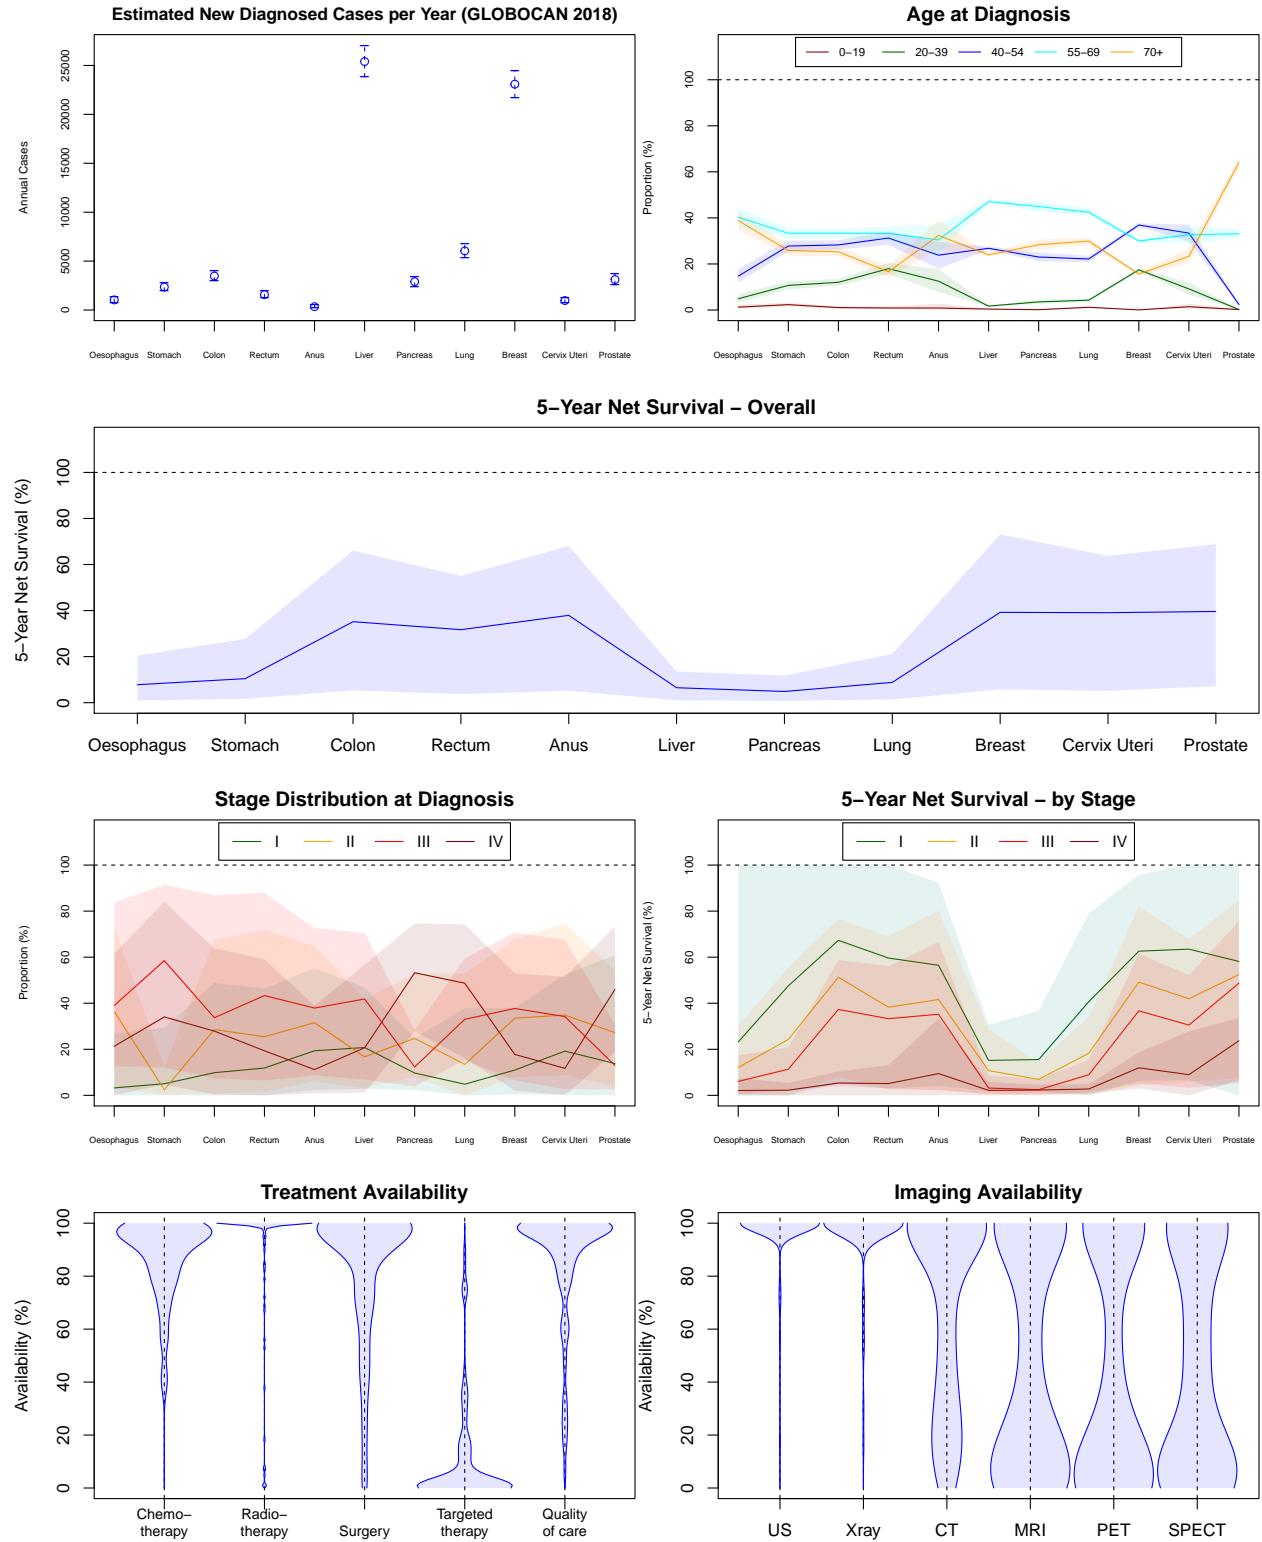

# El Salvador

| ISO Code | Region          | Area                            | Income Group        |
|----------|-----------------|---------------------------------|---------------------|
| SLV      | Central America | Latin America and the Caribbean | Lower middle income |

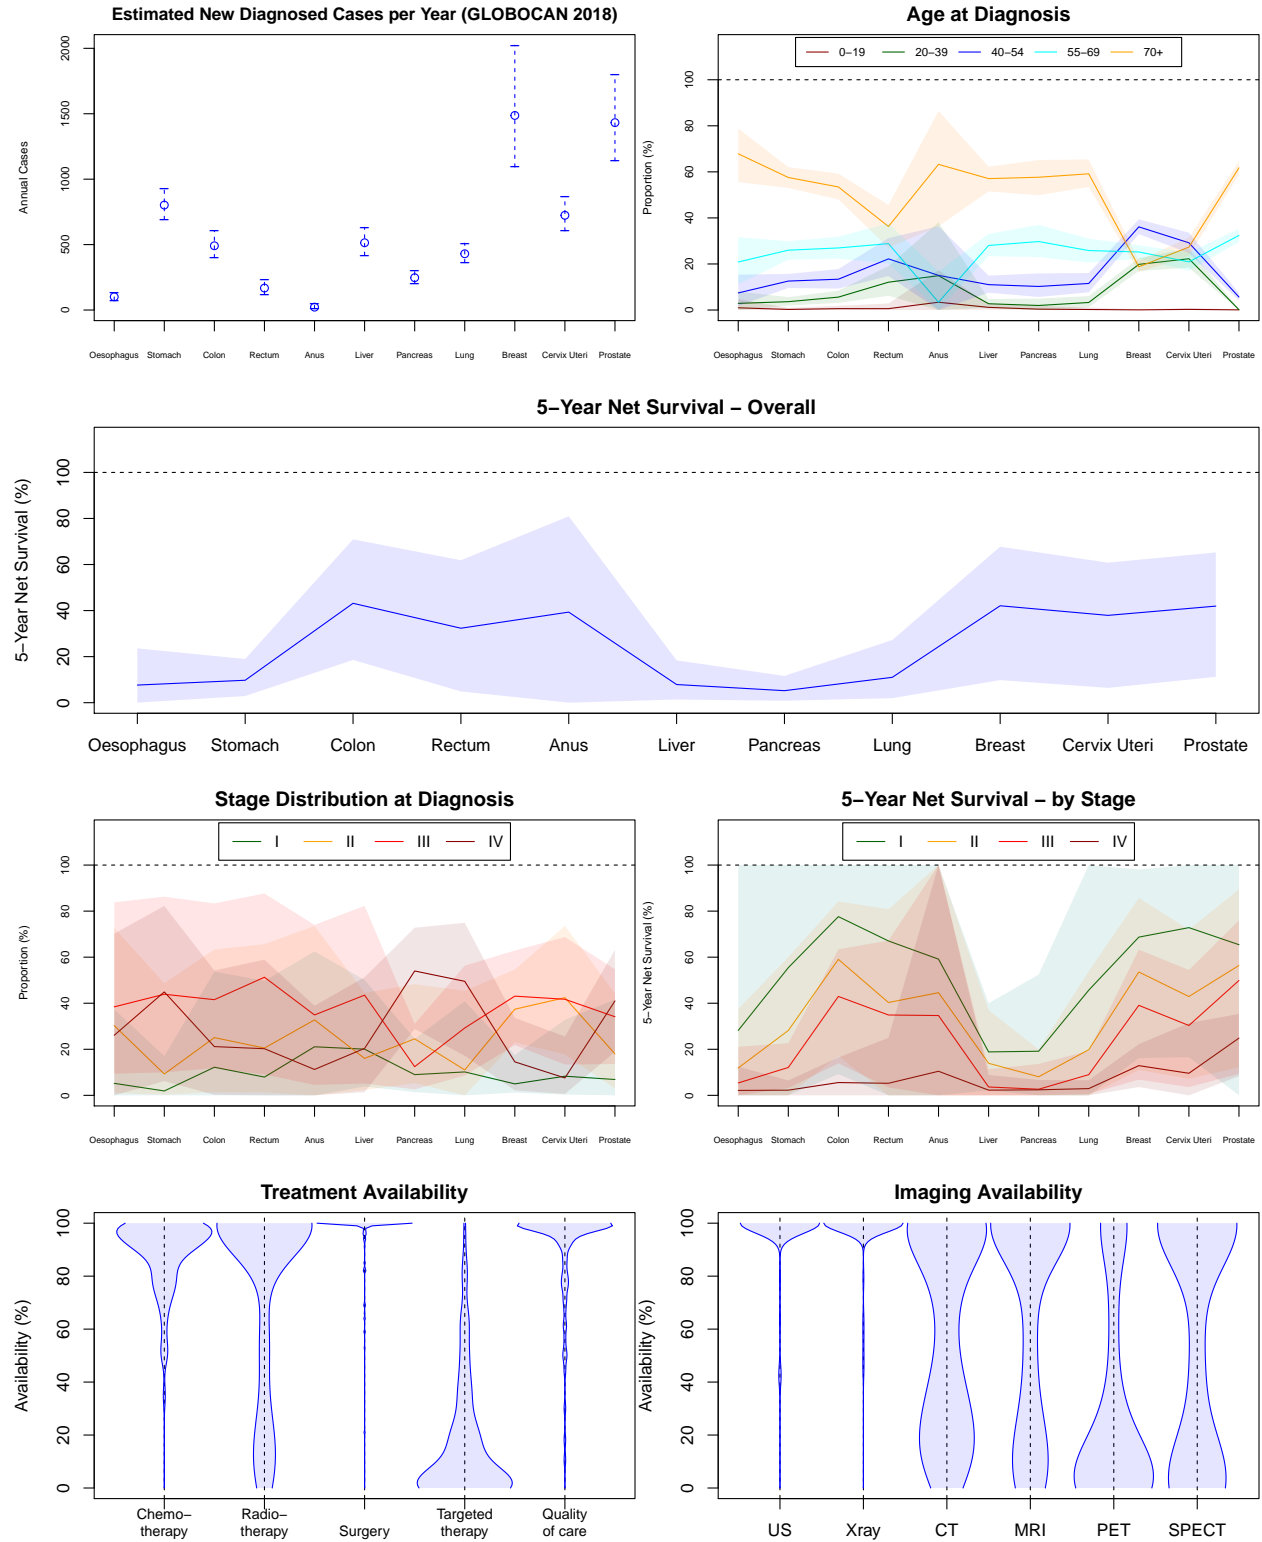

# Equatorial Guinea

| ISO Code | Region        | Area   | Income Group        |
|----------|---------------|--------|---------------------|
| GNQ      | Middle Africa | Africa | Upper middle income |

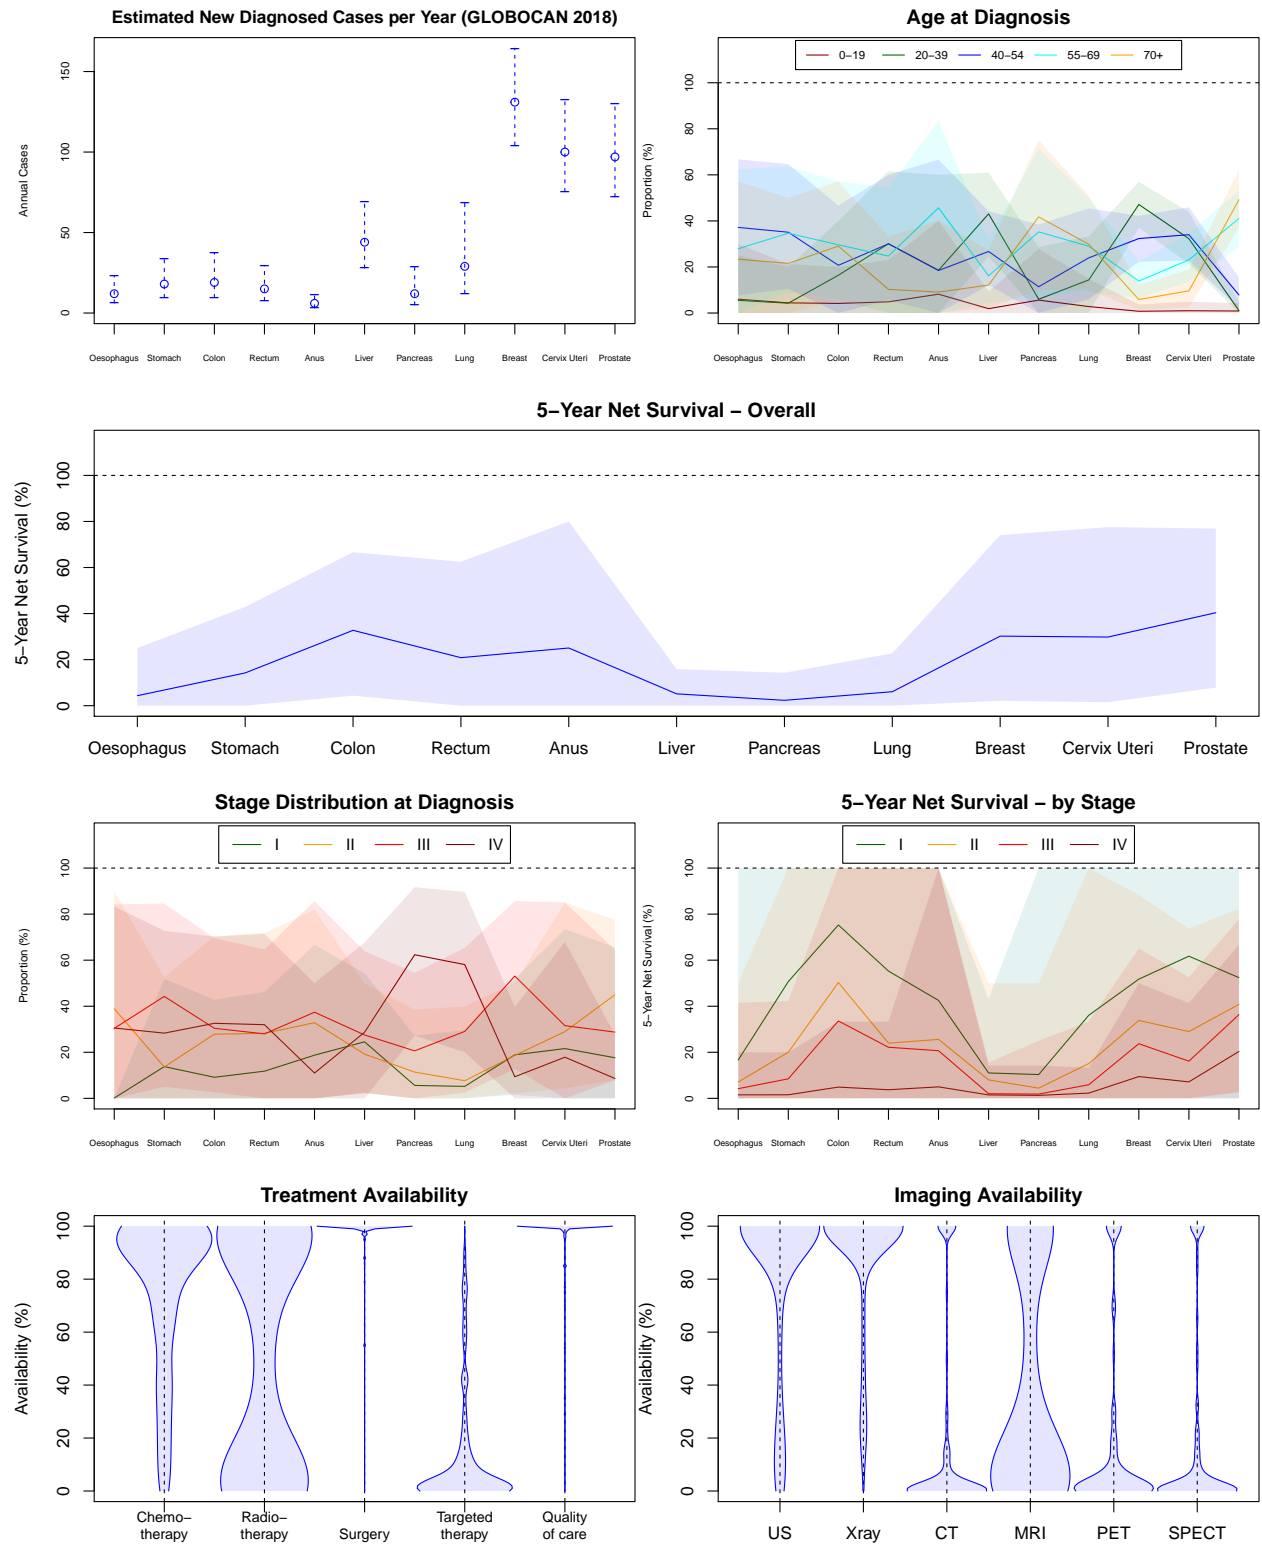

# Eritrea

| ISO Code | Region         | Area   | Income Group |
|----------|----------------|--------|--------------|
| ERI      | Eastern Africa | Africa | Low income   |

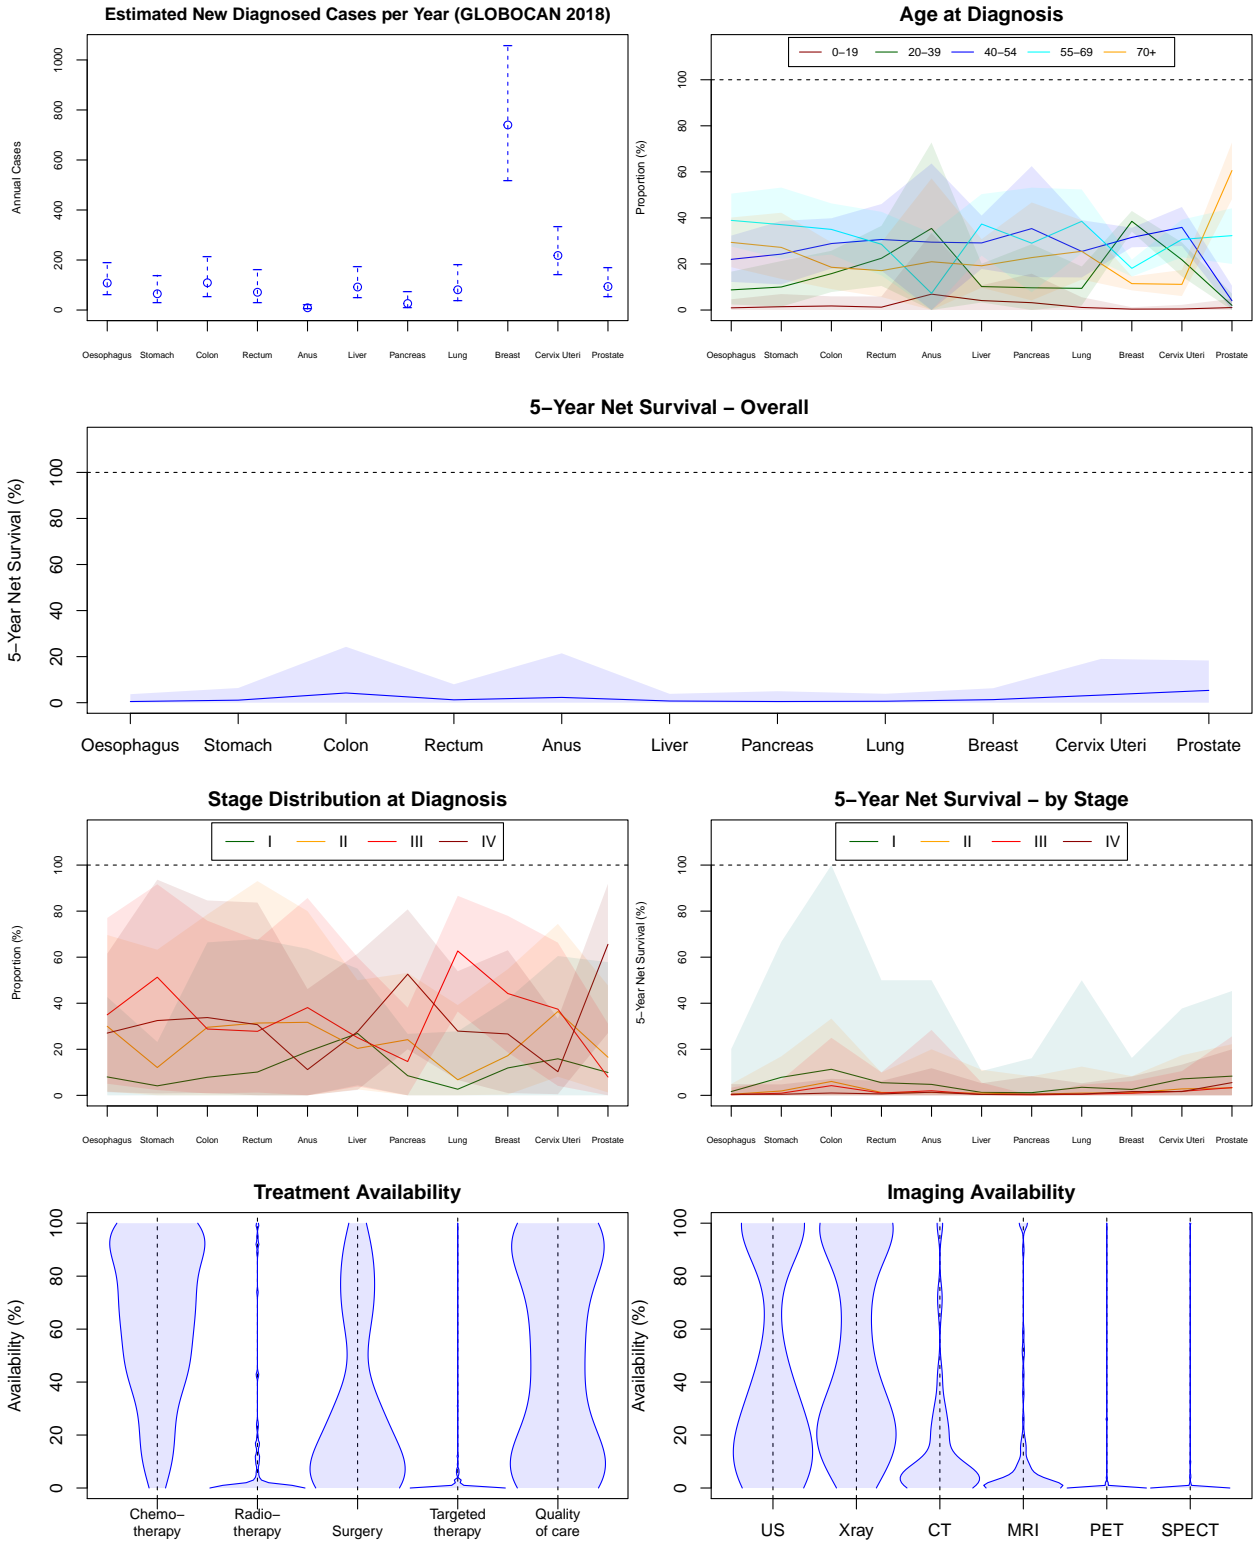



# Estonia

| ISO Code | Region          | Area   | Income Group |
|----------|-----------------|--------|--------------|
| EST      | Northern Europe | Europe | High income  |

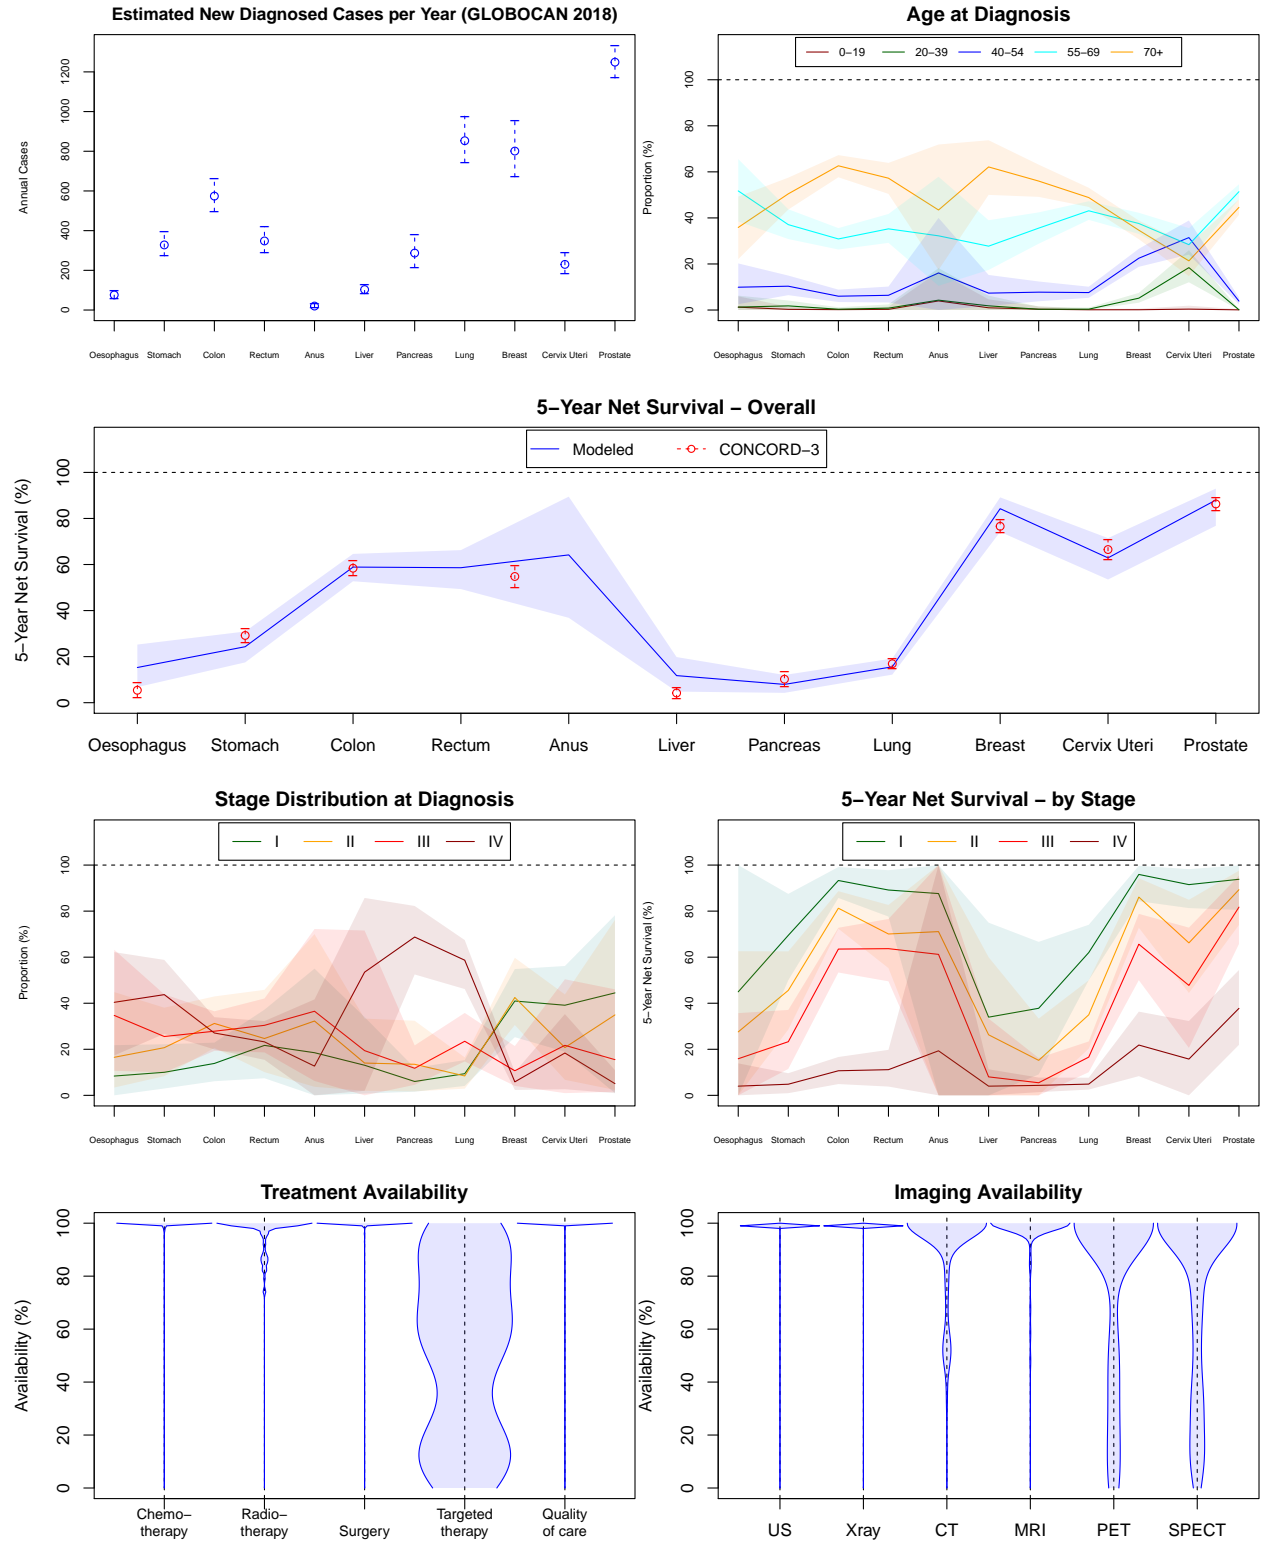

# Eswatini

| ISO Code | Region          | Area   | Income Group        |
|----------|-----------------|--------|---------------------|
| SWZ      | Southern Africa | Africa | Lower middle income |

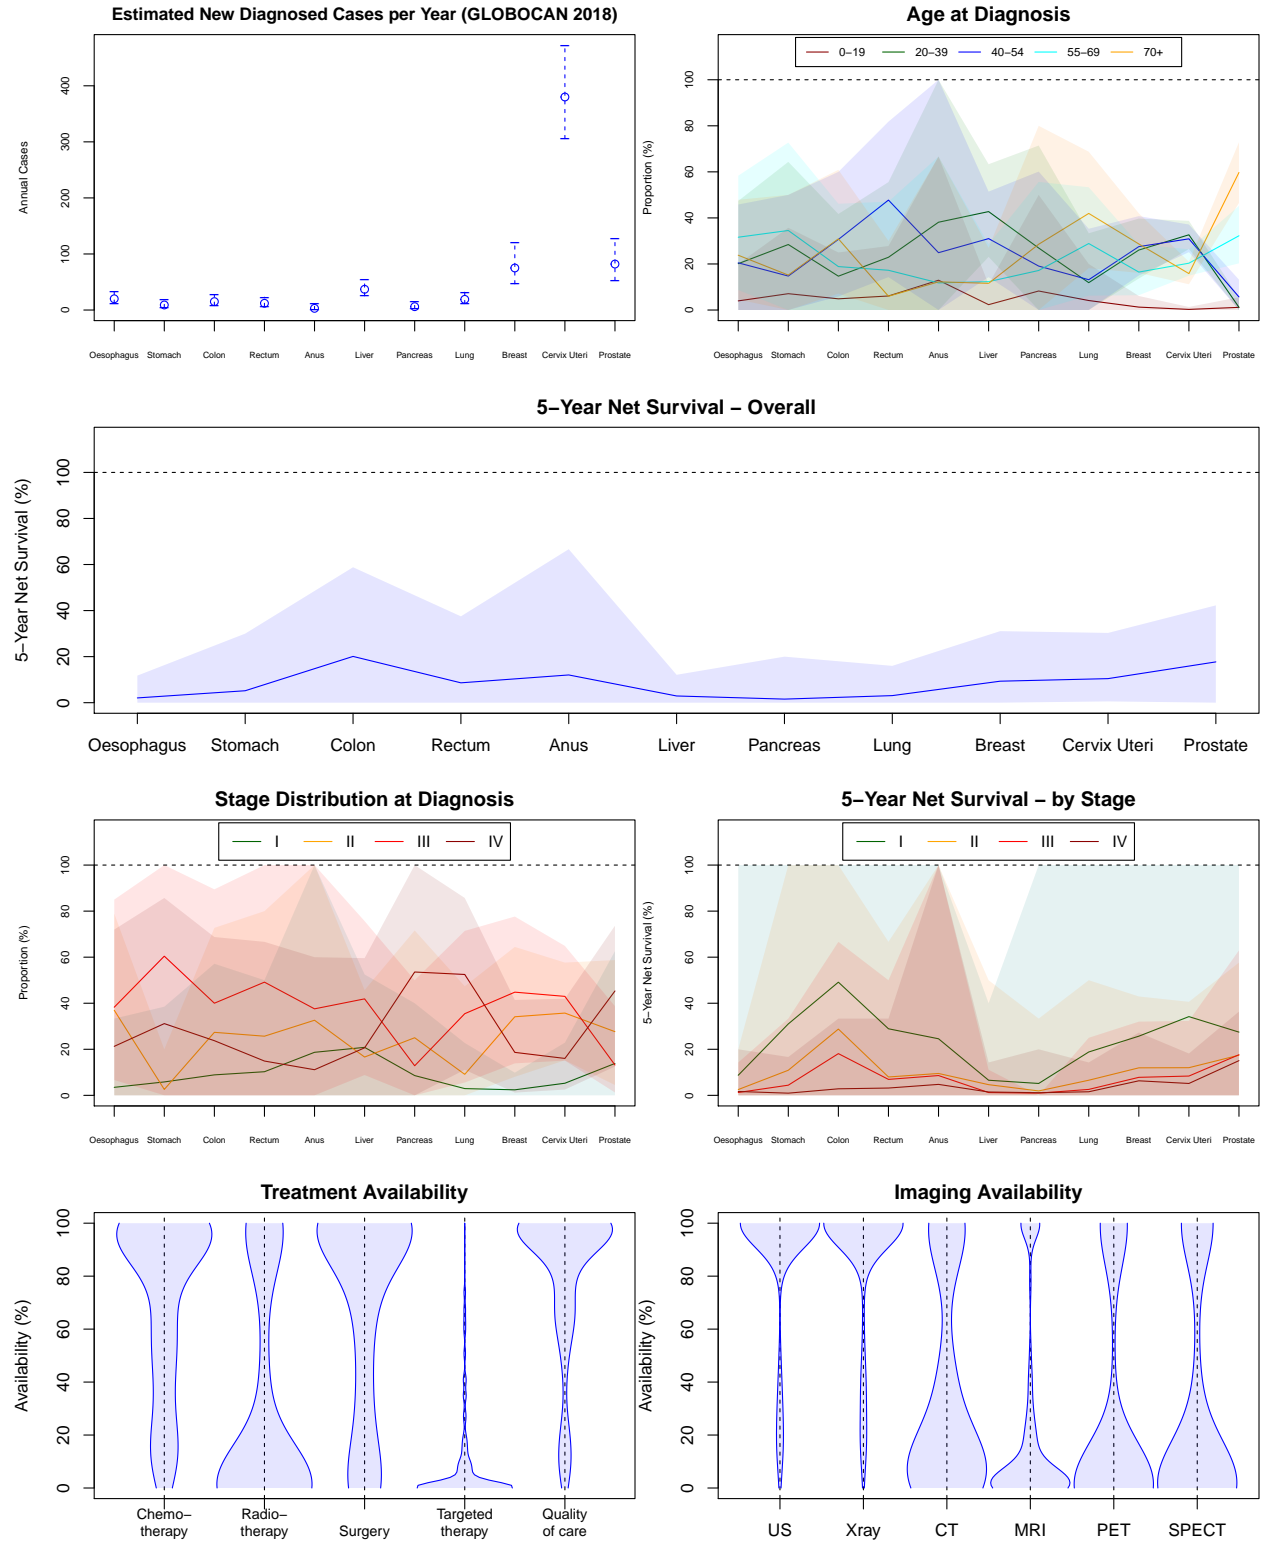

# Ethiopia

| ISO Code | Region         | Area   | Income Group |
|----------|----------------|--------|--------------|
| ETH      | Eastern Africa | Africa | Low income   |

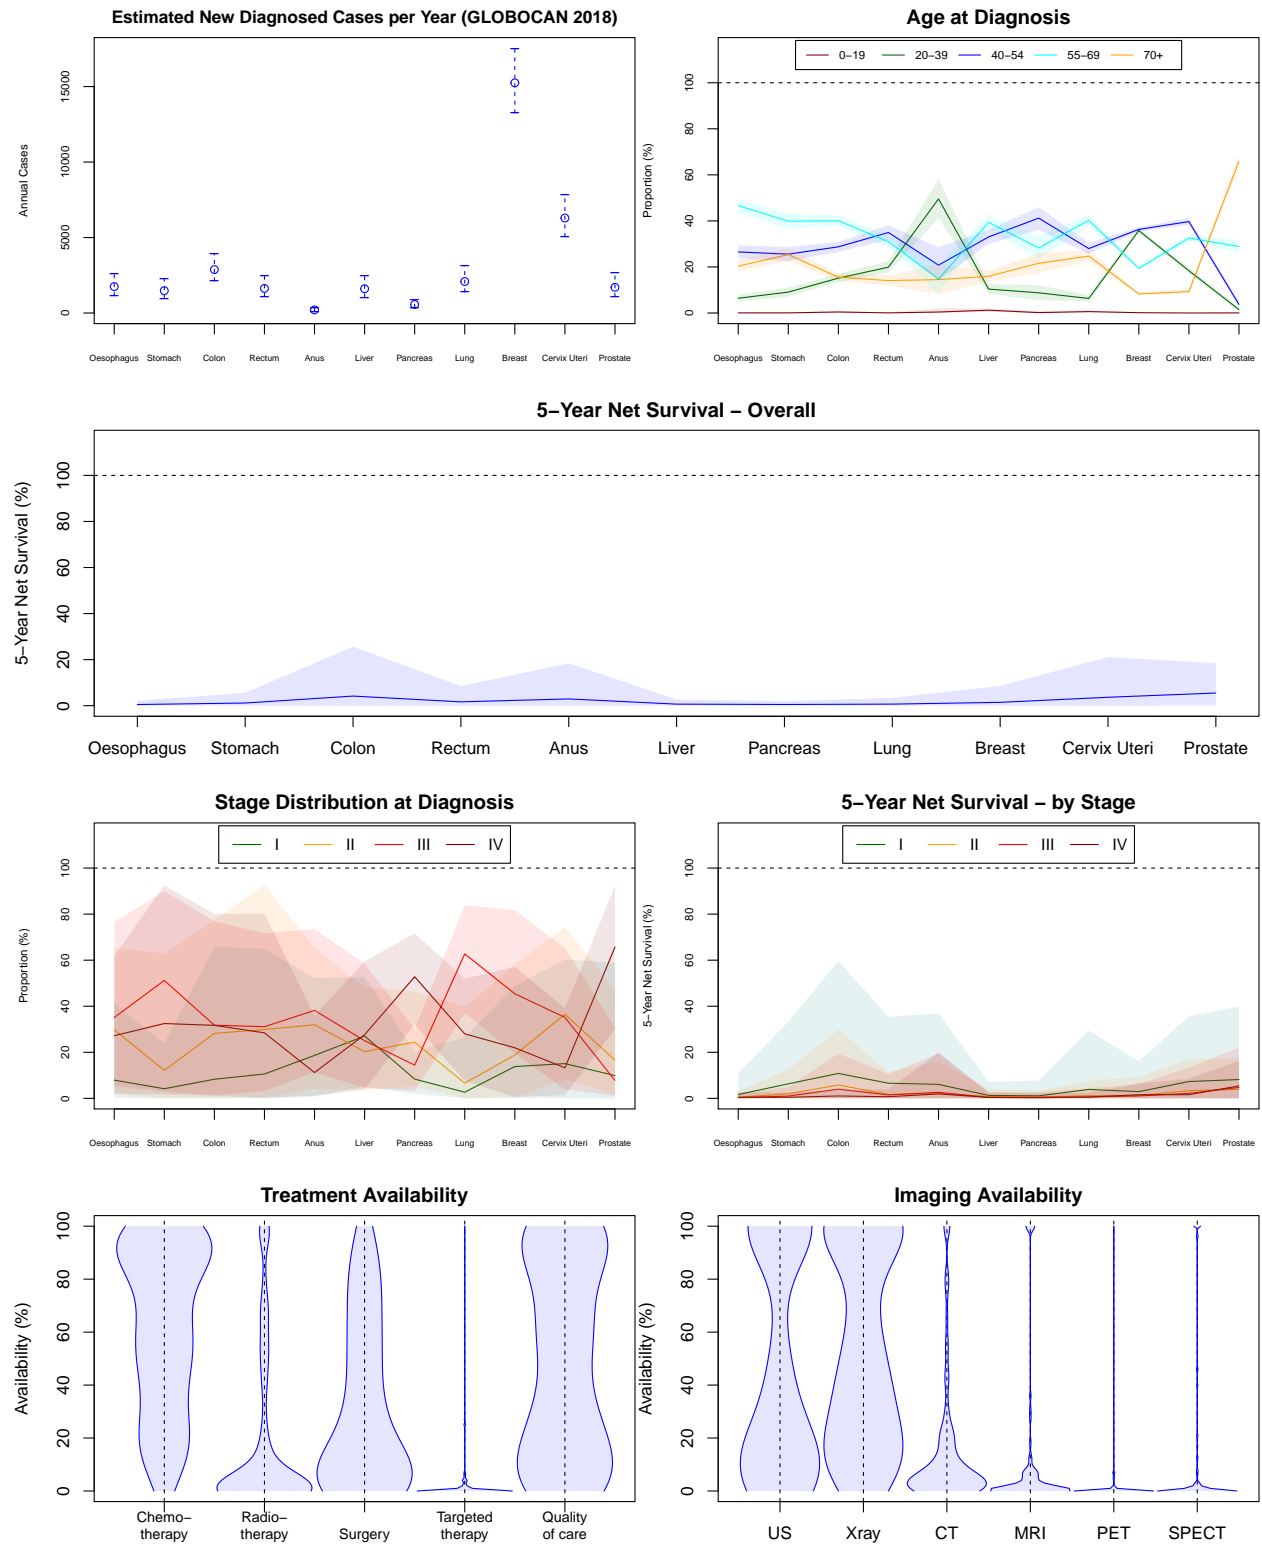

# Faroe Islands

| ISO Code | Region          | Area   | Income Group |
|----------|-----------------|--------|--------------|
| FRO      | Northern Europe | Europe | High income  |

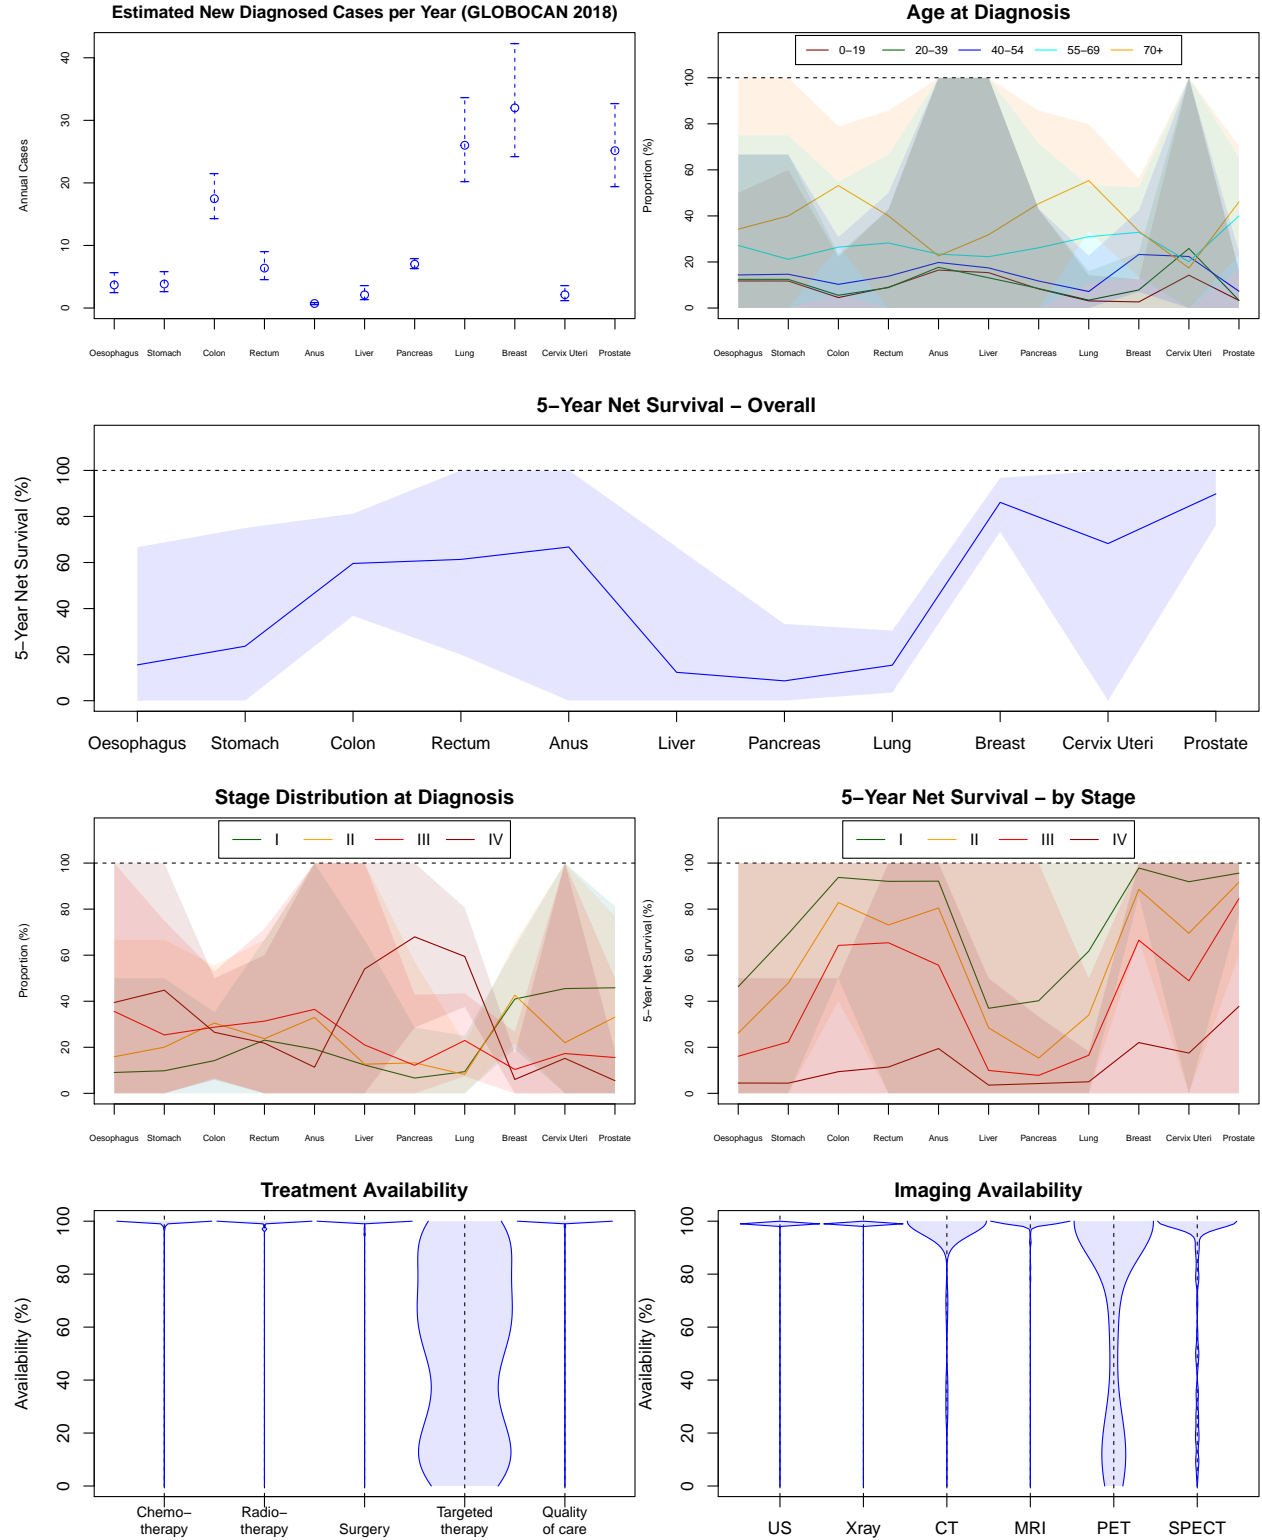

# Fiji

| ISO Code | Region    | Area    | Income Group        |
|----------|-----------|---------|---------------------|
| FJI      | Melanesia | Oceania | Upper middle income |

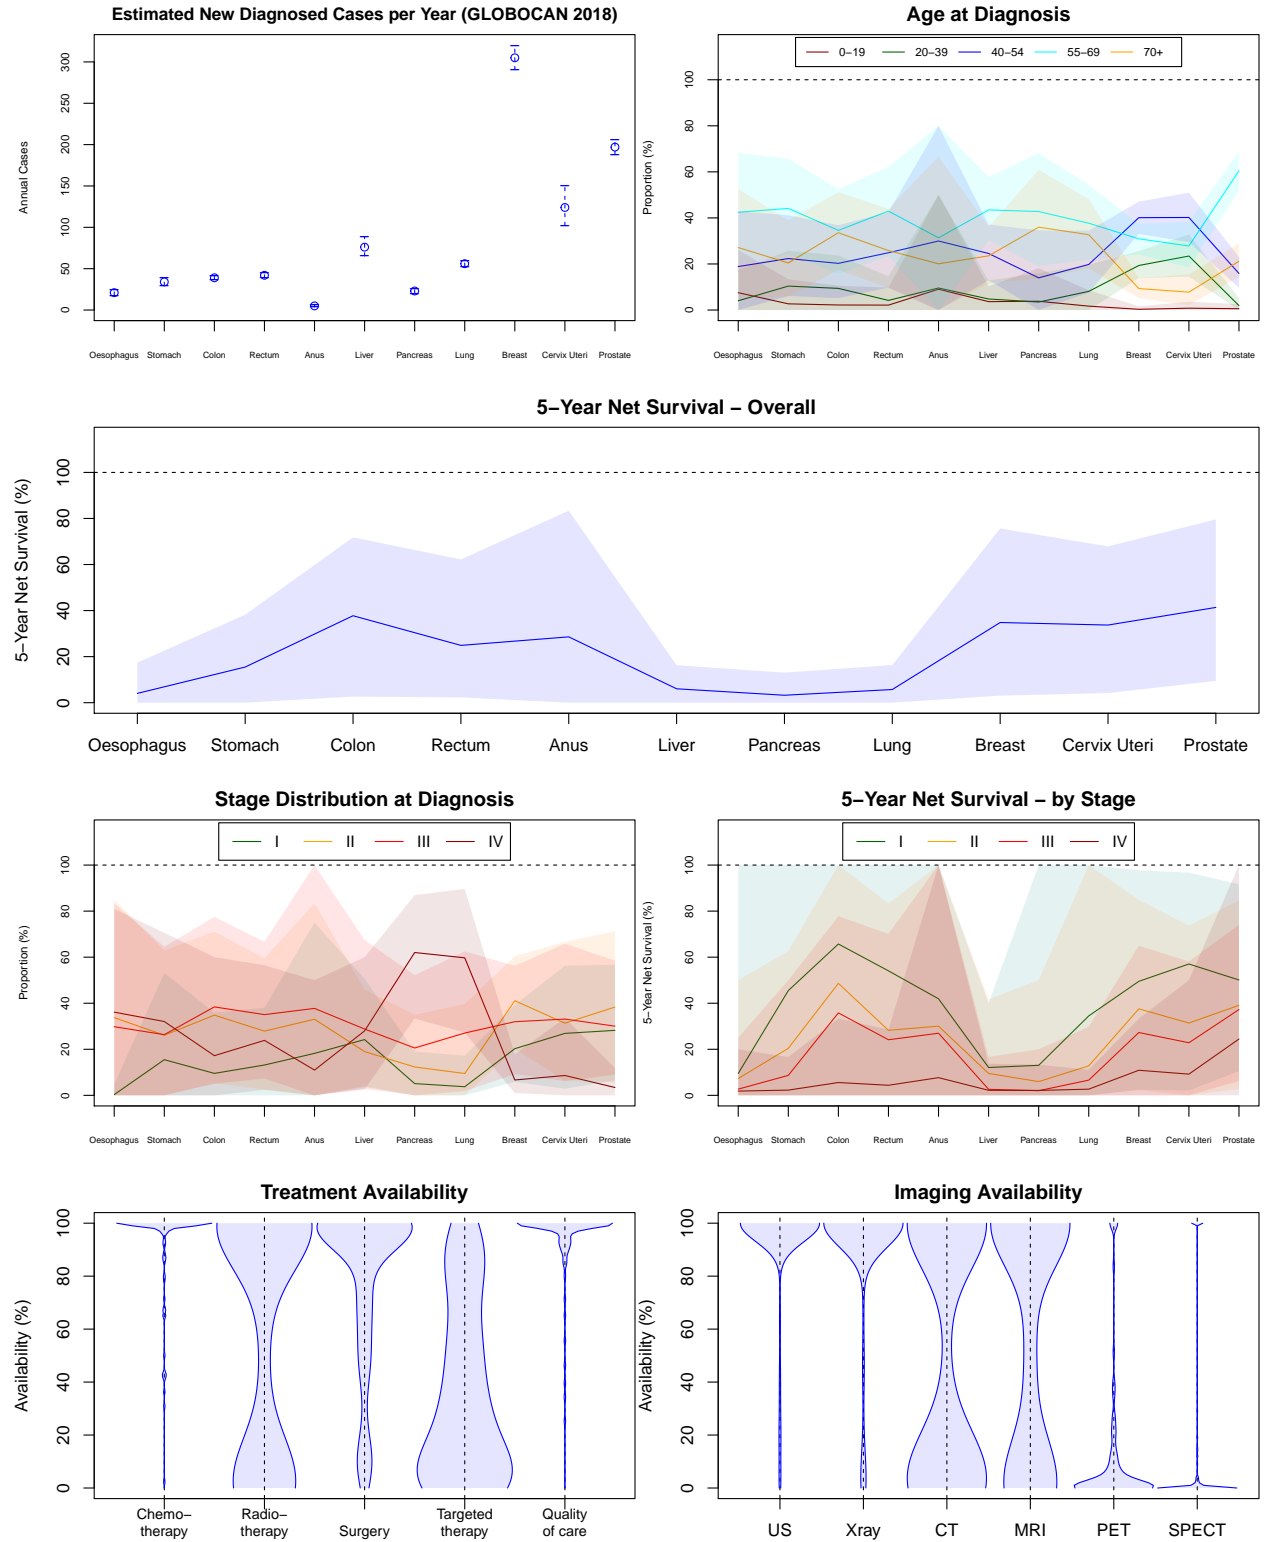

# Finland

| ISO Code | Region          | Area   | Income Group |
|----------|-----------------|--------|--------------|
| FIN      | Northern Europe | Europe | High income  |

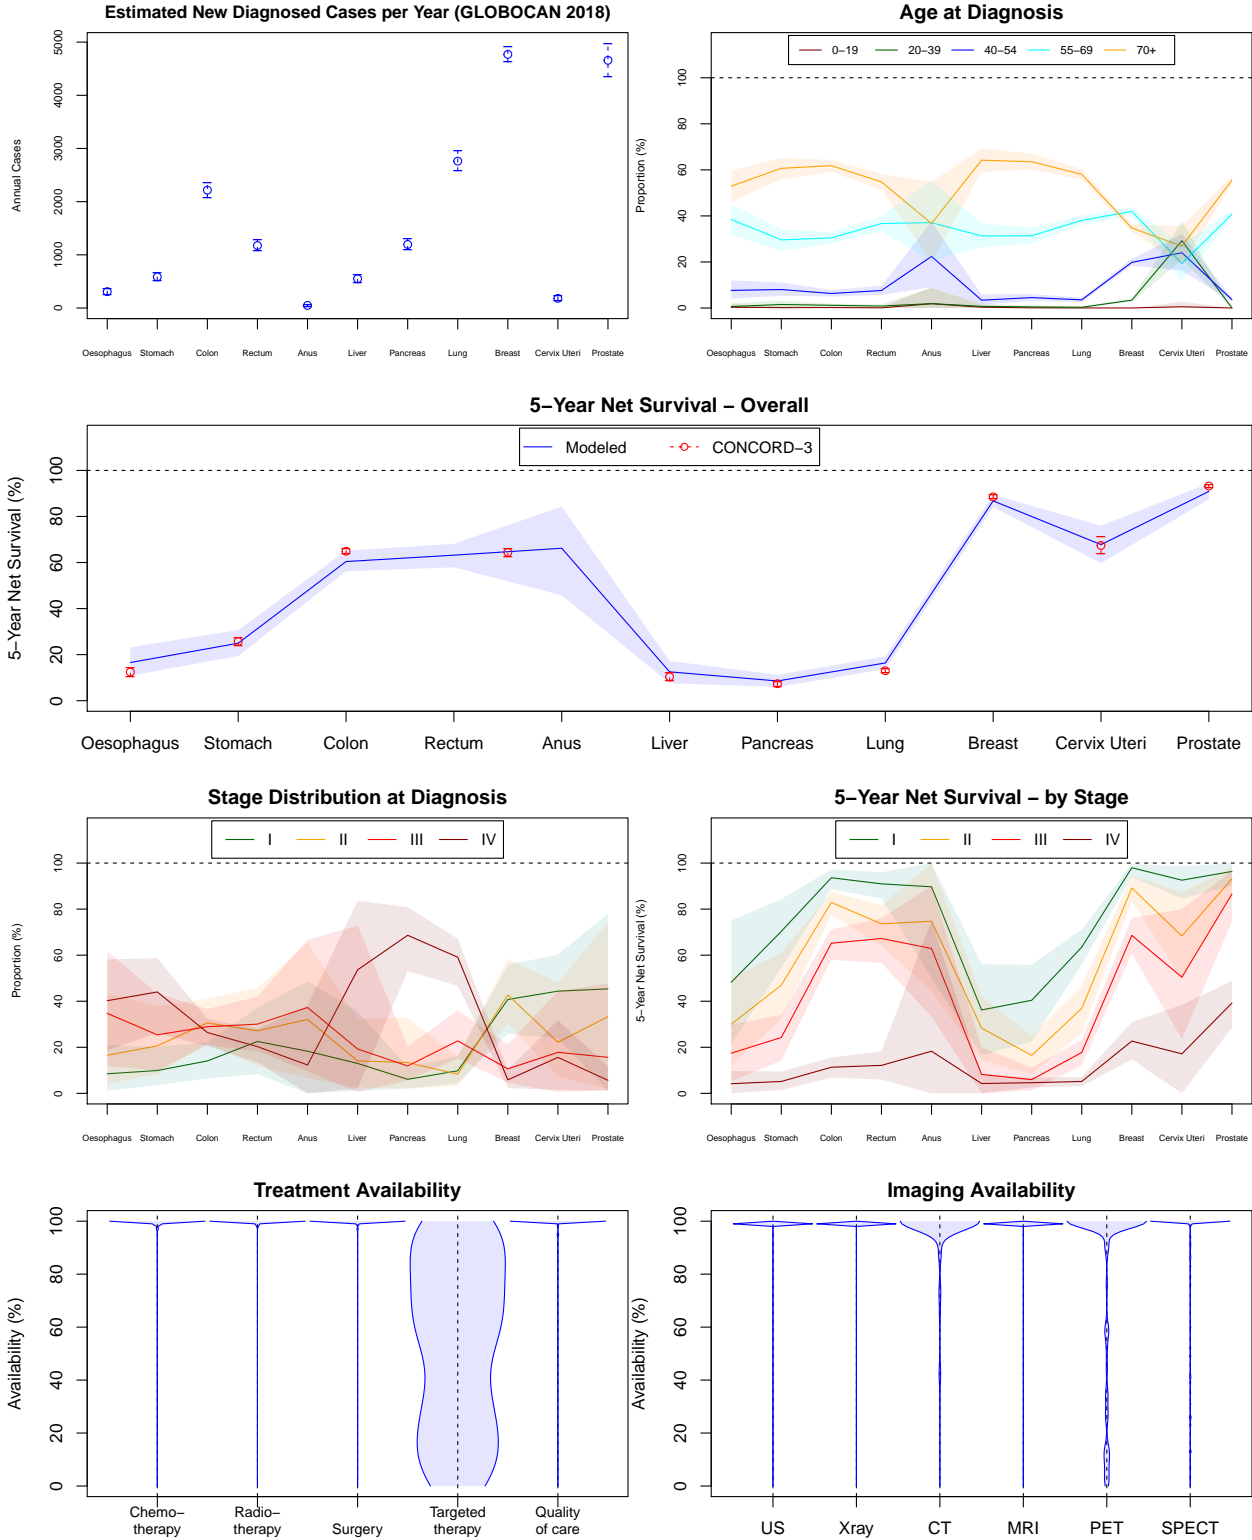

# France

| ISO Code | Region         | Area   | Income Group |
|----------|----------------|--------|--------------|
| FRA      | Western Europe | Europe | High income  |

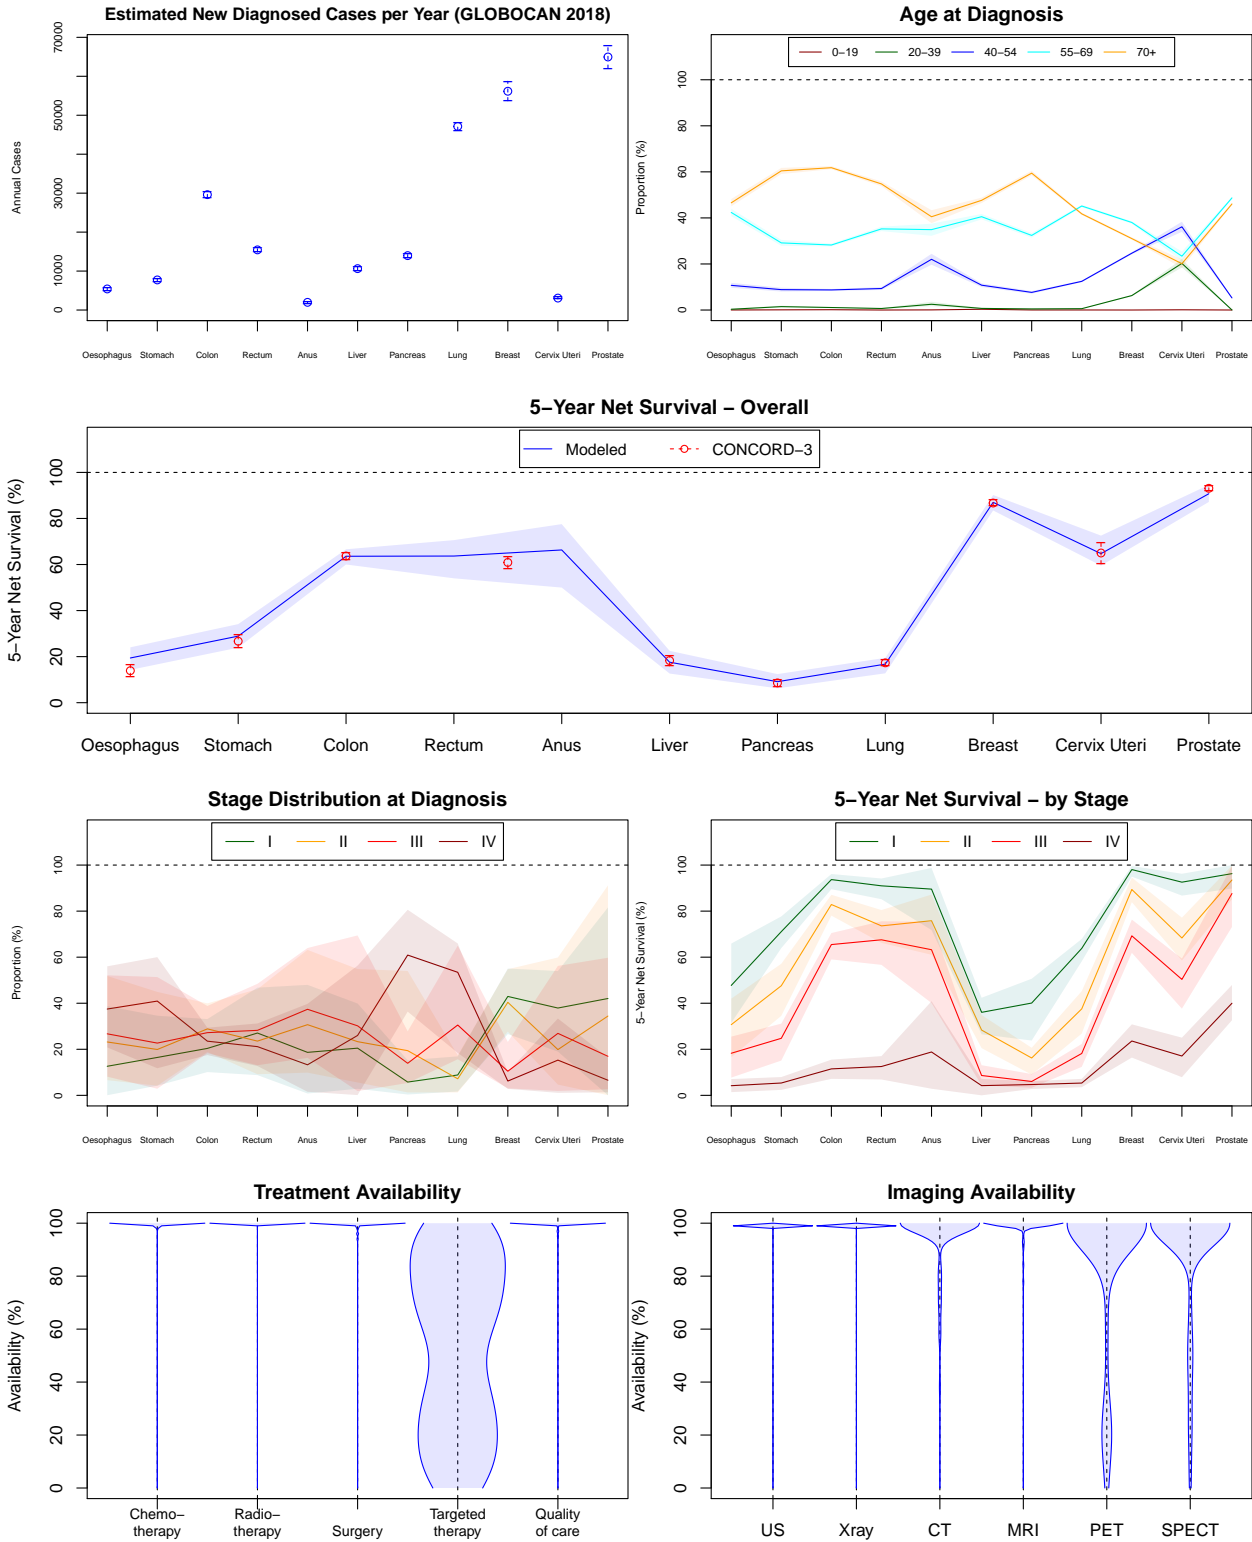

# Gabon

| ISO Code | Region        | Area   | Income Group        |
|----------|---------------|--------|---------------------|
| GAB      | Middle Africa | Africa | Upper middle income |

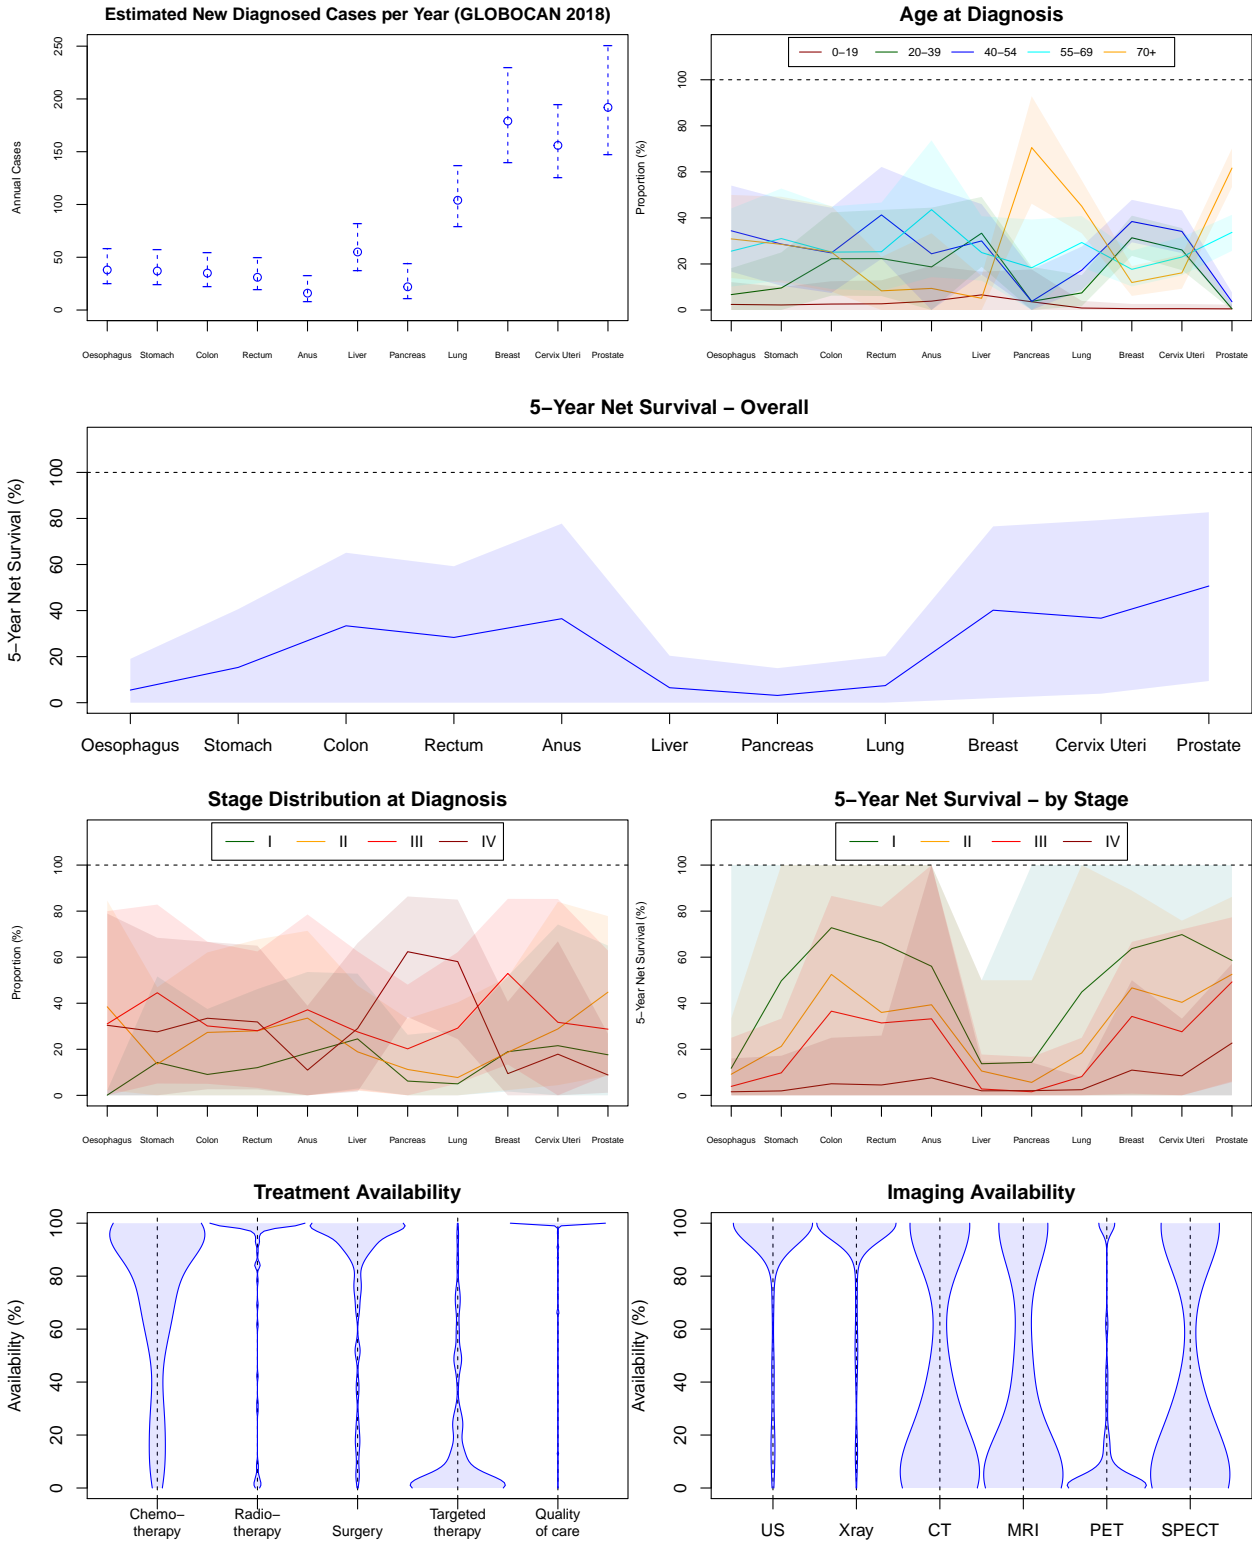



# Gambia

| ISO Code | Region         | Area   | Income Group |
|----------|----------------|--------|--------------|
| GMB      | Western Africa | Africa | Low income   |

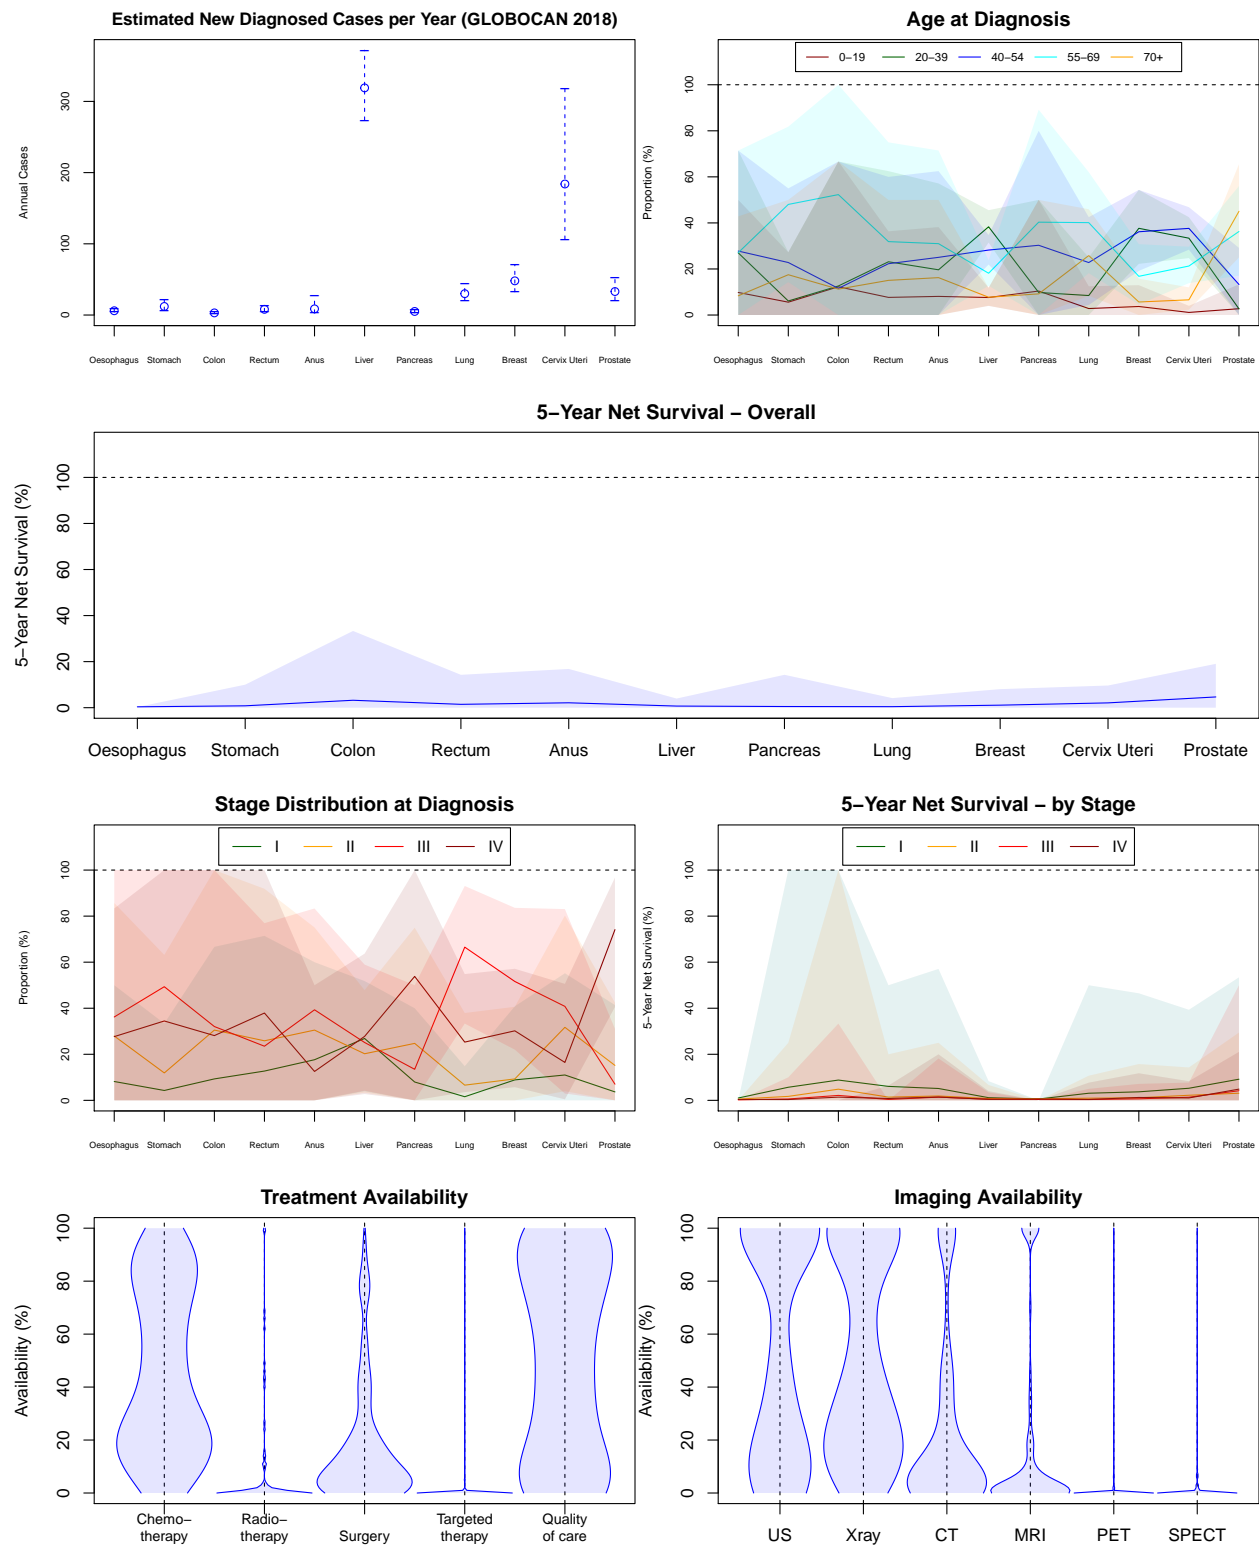

# Georgia

| ISO Code | Region       | Area | Income Group        |
|----------|--------------|------|---------------------|
| GEO      | Western Asia | Asia | Lower middle income |

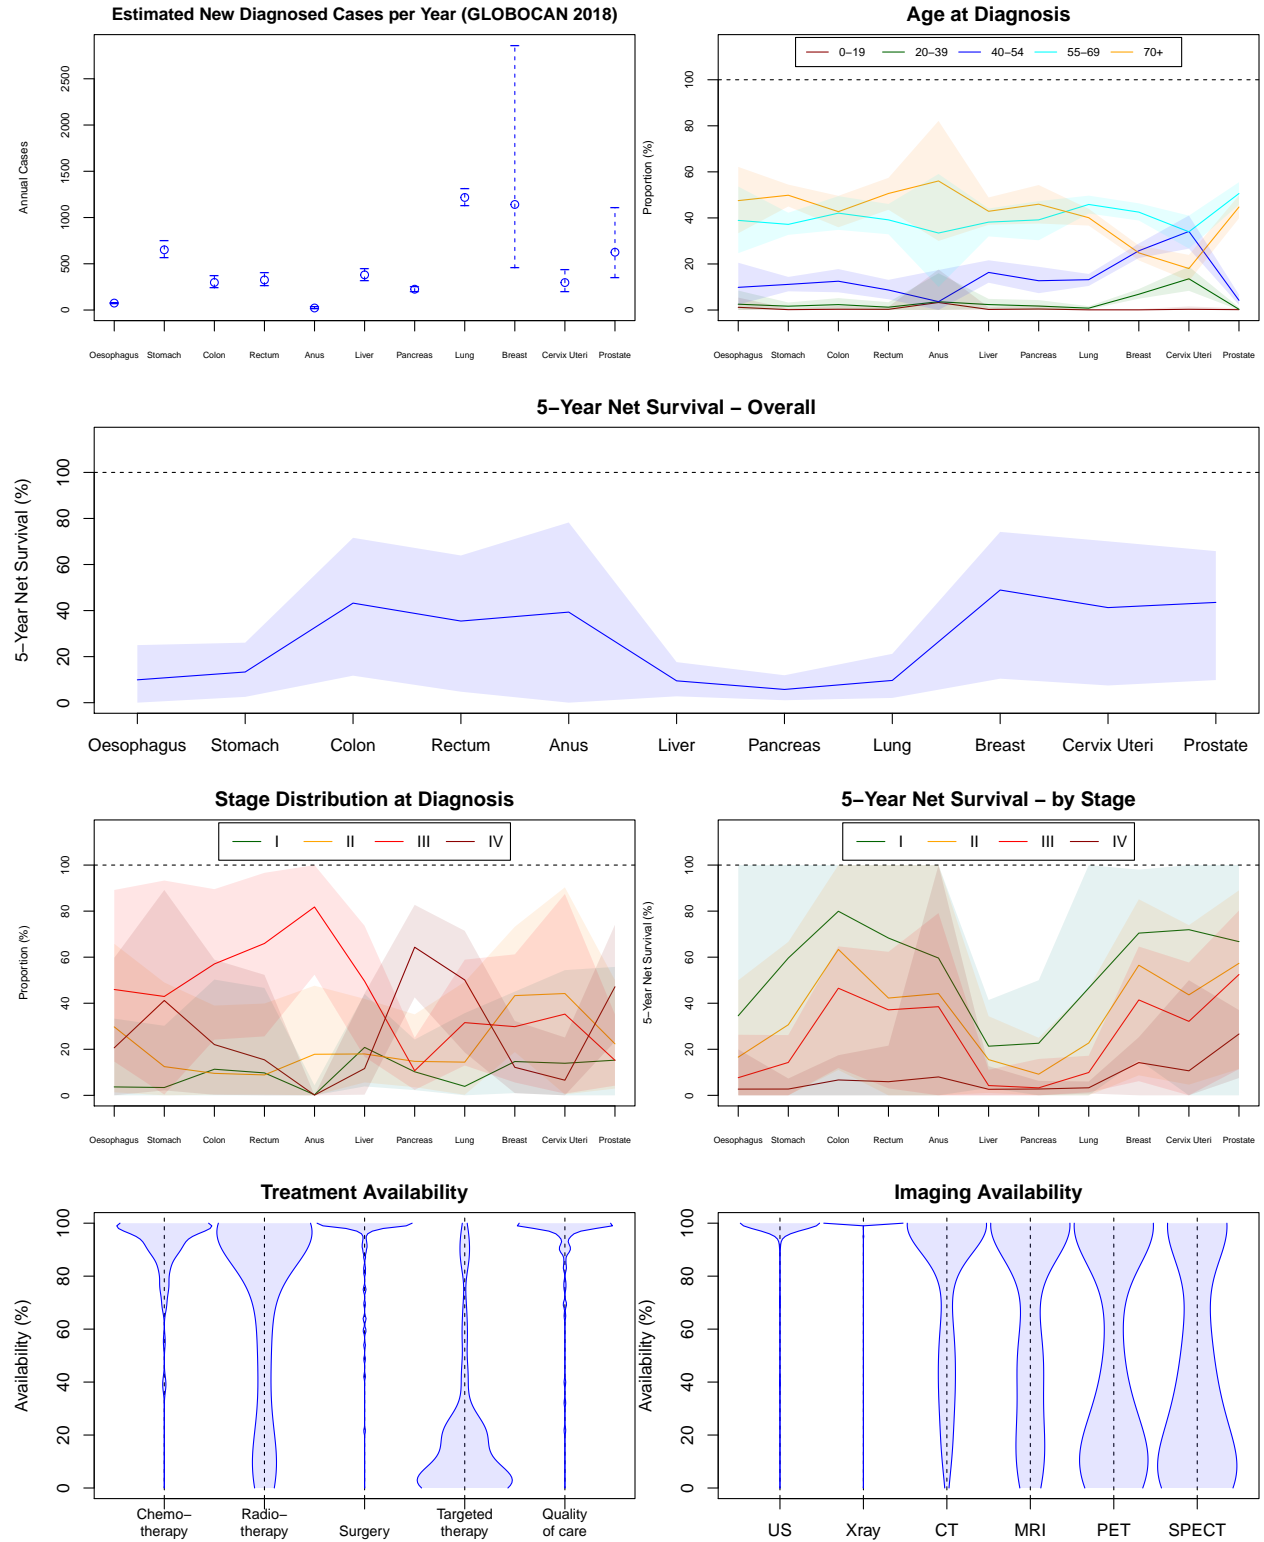

# Germany

| ISO Code | Region         | Area   | Income Group |
|----------|----------------|--------|--------------|
| DEU      | Western Europe | Europe | High income  |

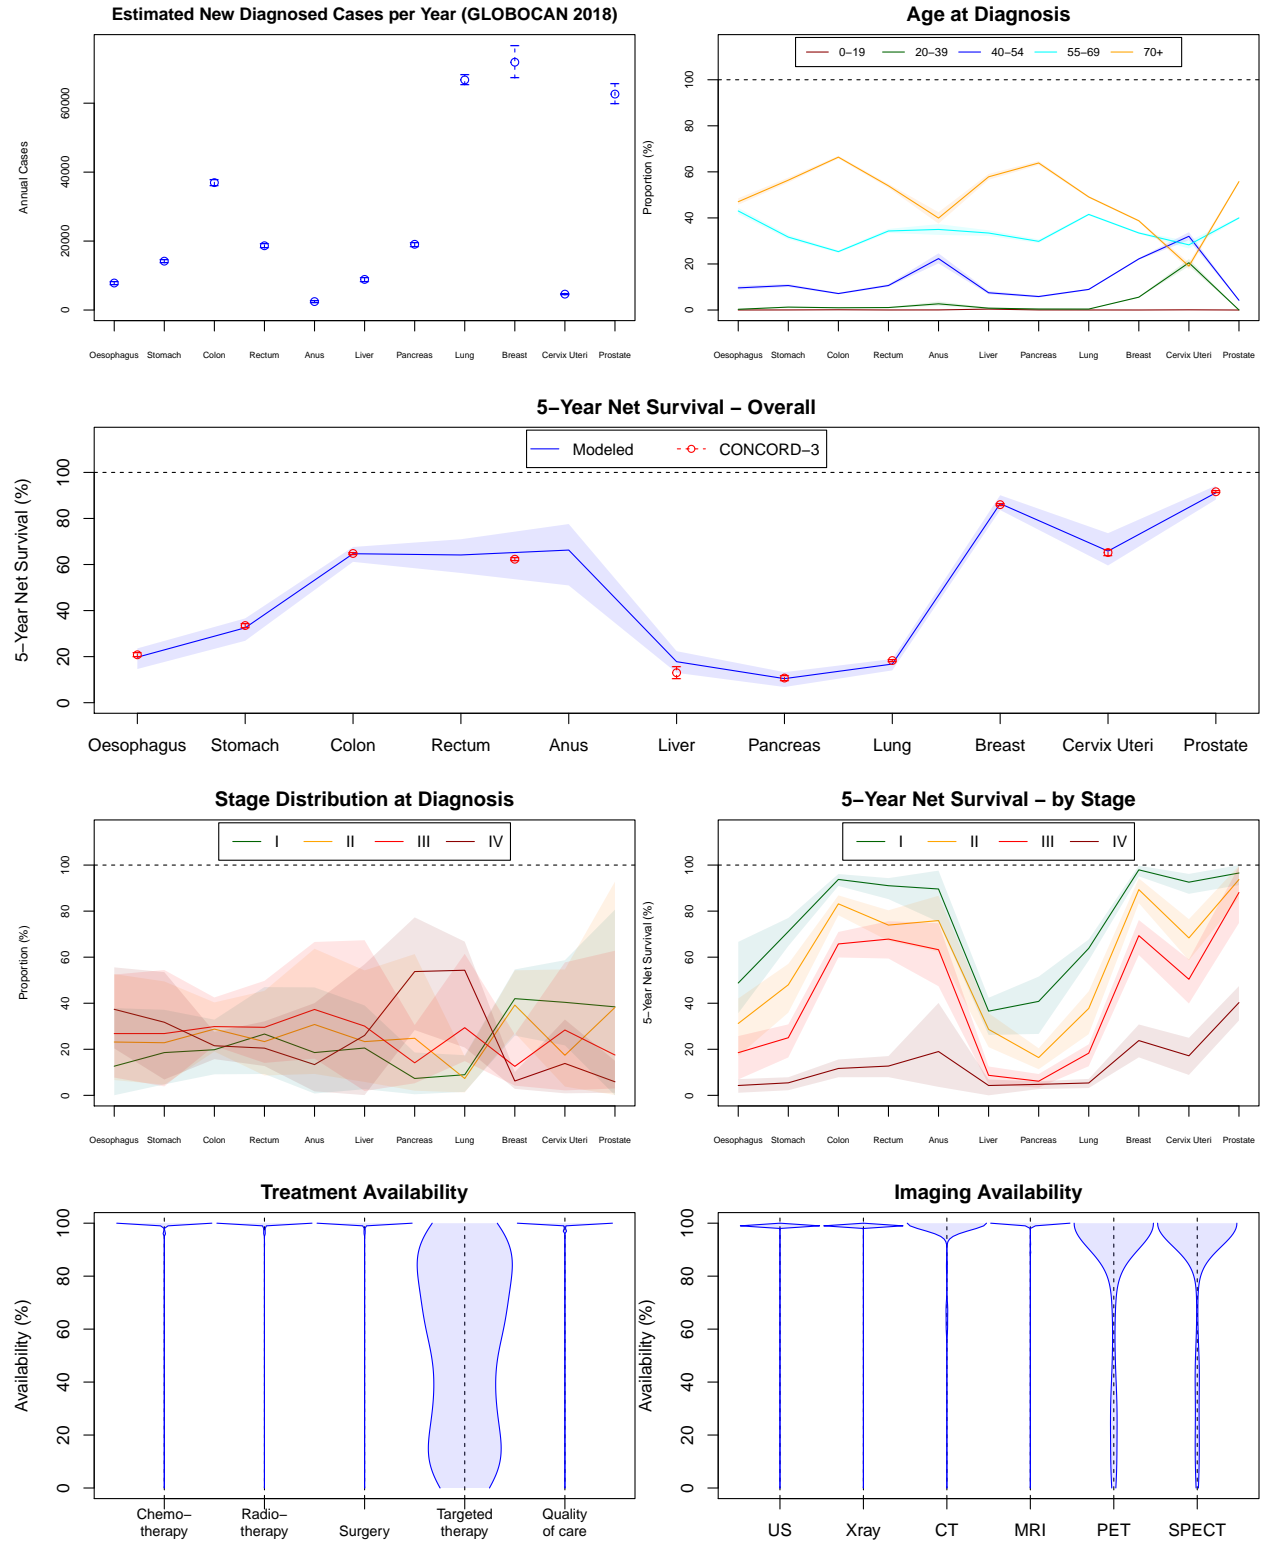

# Ghana

| ISO Code | Region         | Area   | Income Group        |
|----------|----------------|--------|---------------------|
| GHA      | Western Africa | Africa | Lower middle income |

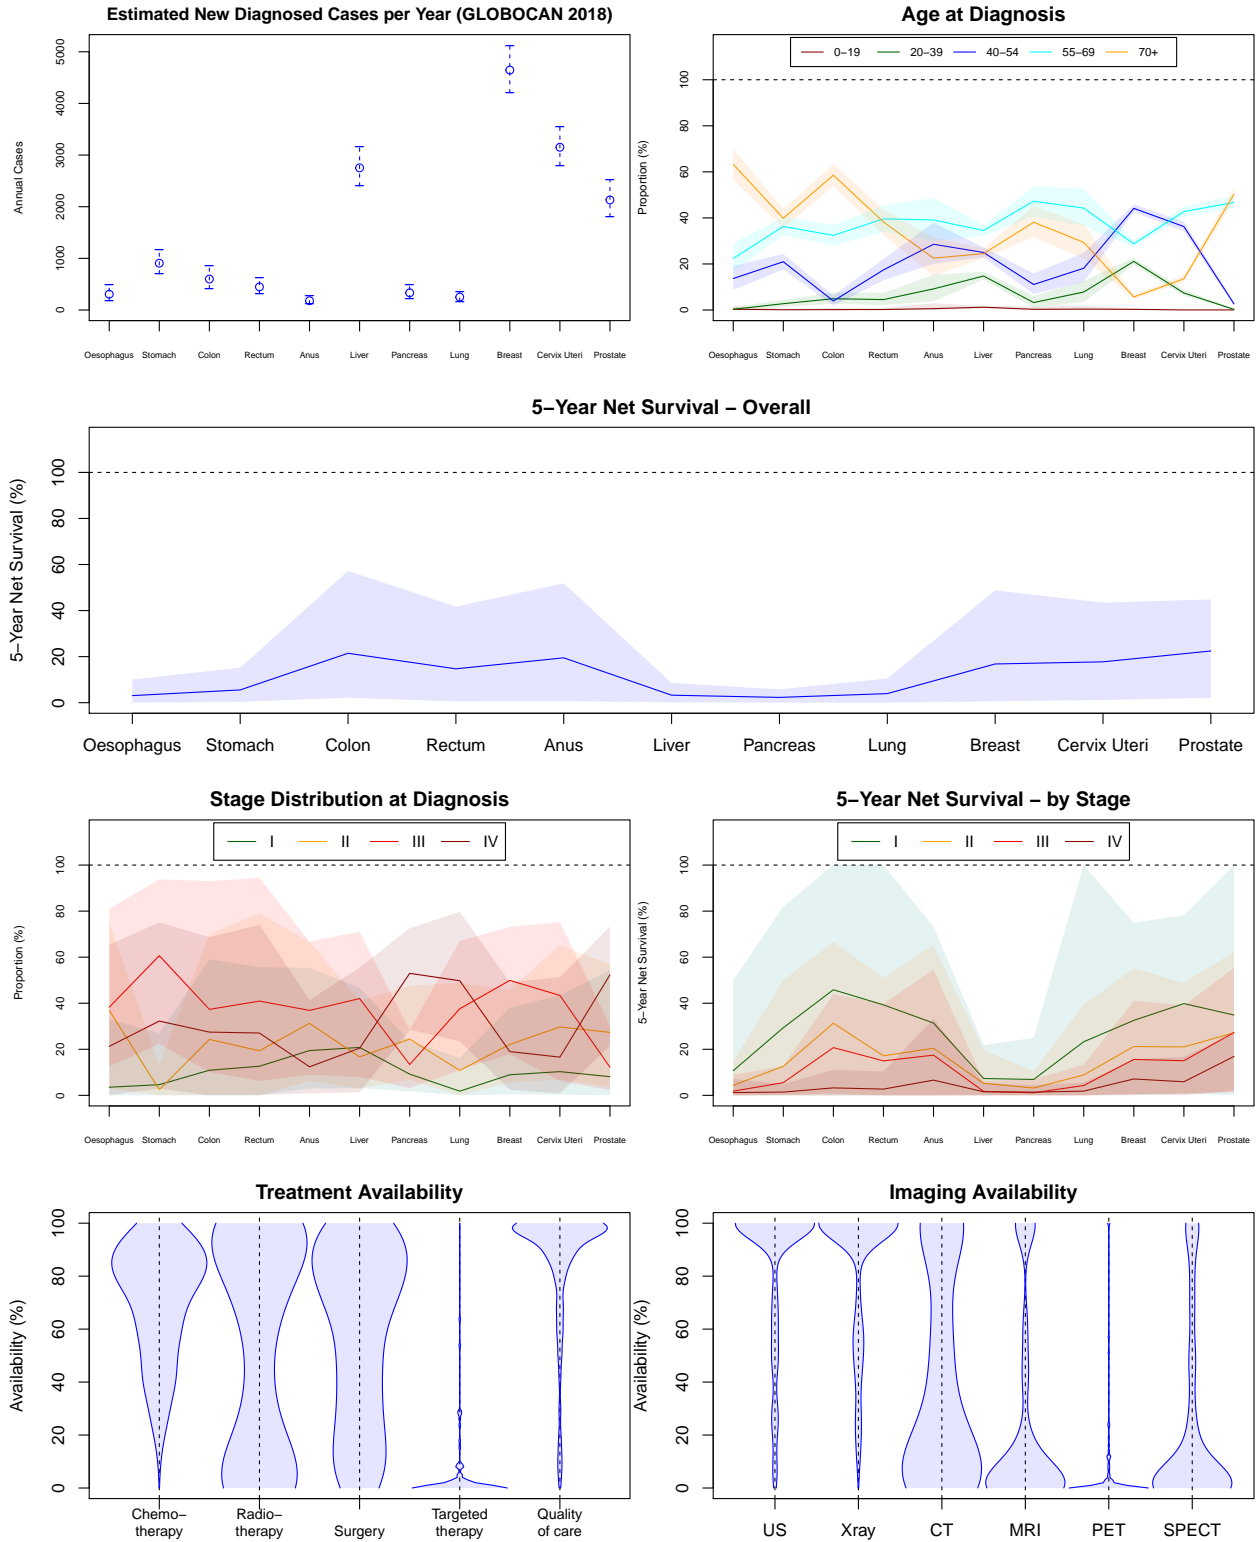

# Greece

| ISO Code | Region          | Area   | Income Group |
|----------|-----------------|--------|--------------|
| GRC      | Southern Europe | Europe | High income  |

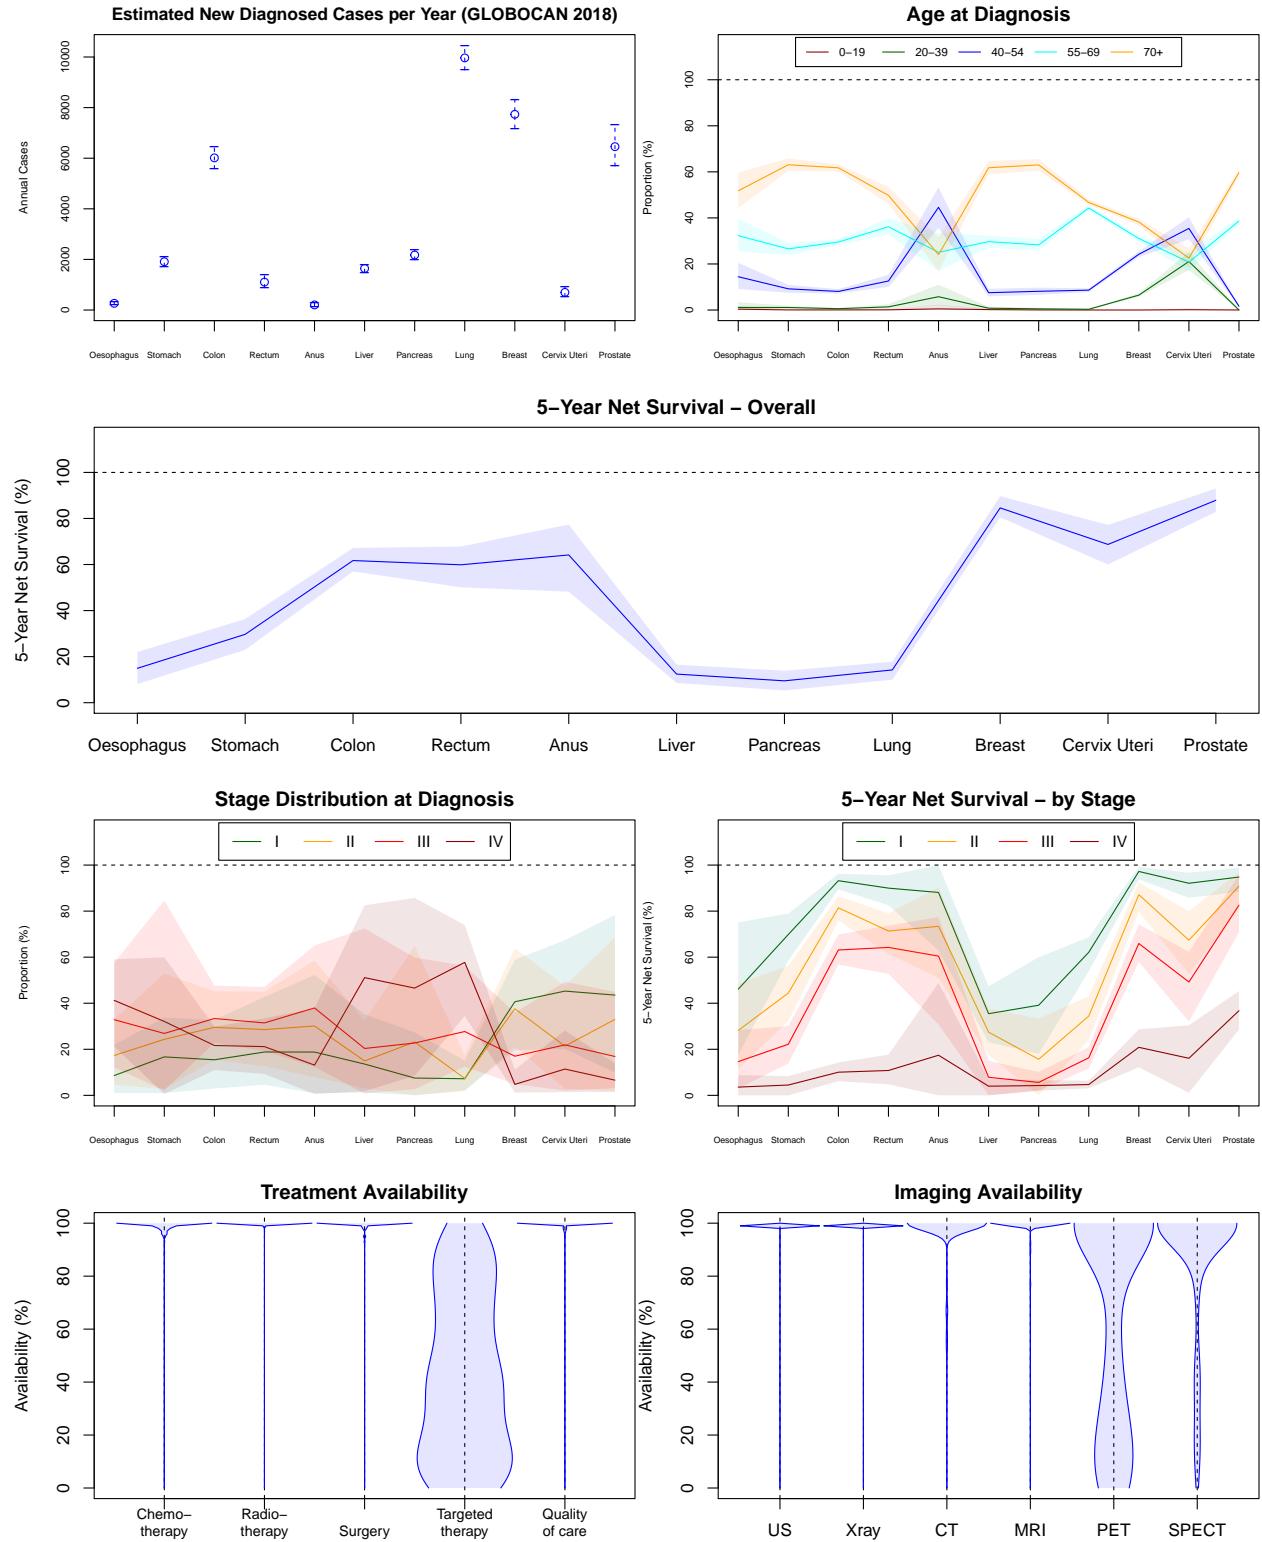

# Greenland

| ISO Code | Region           | Area             | Income Group |
|----------|------------------|------------------|--------------|
| GRL      | Northern America | Northern America | High income  |

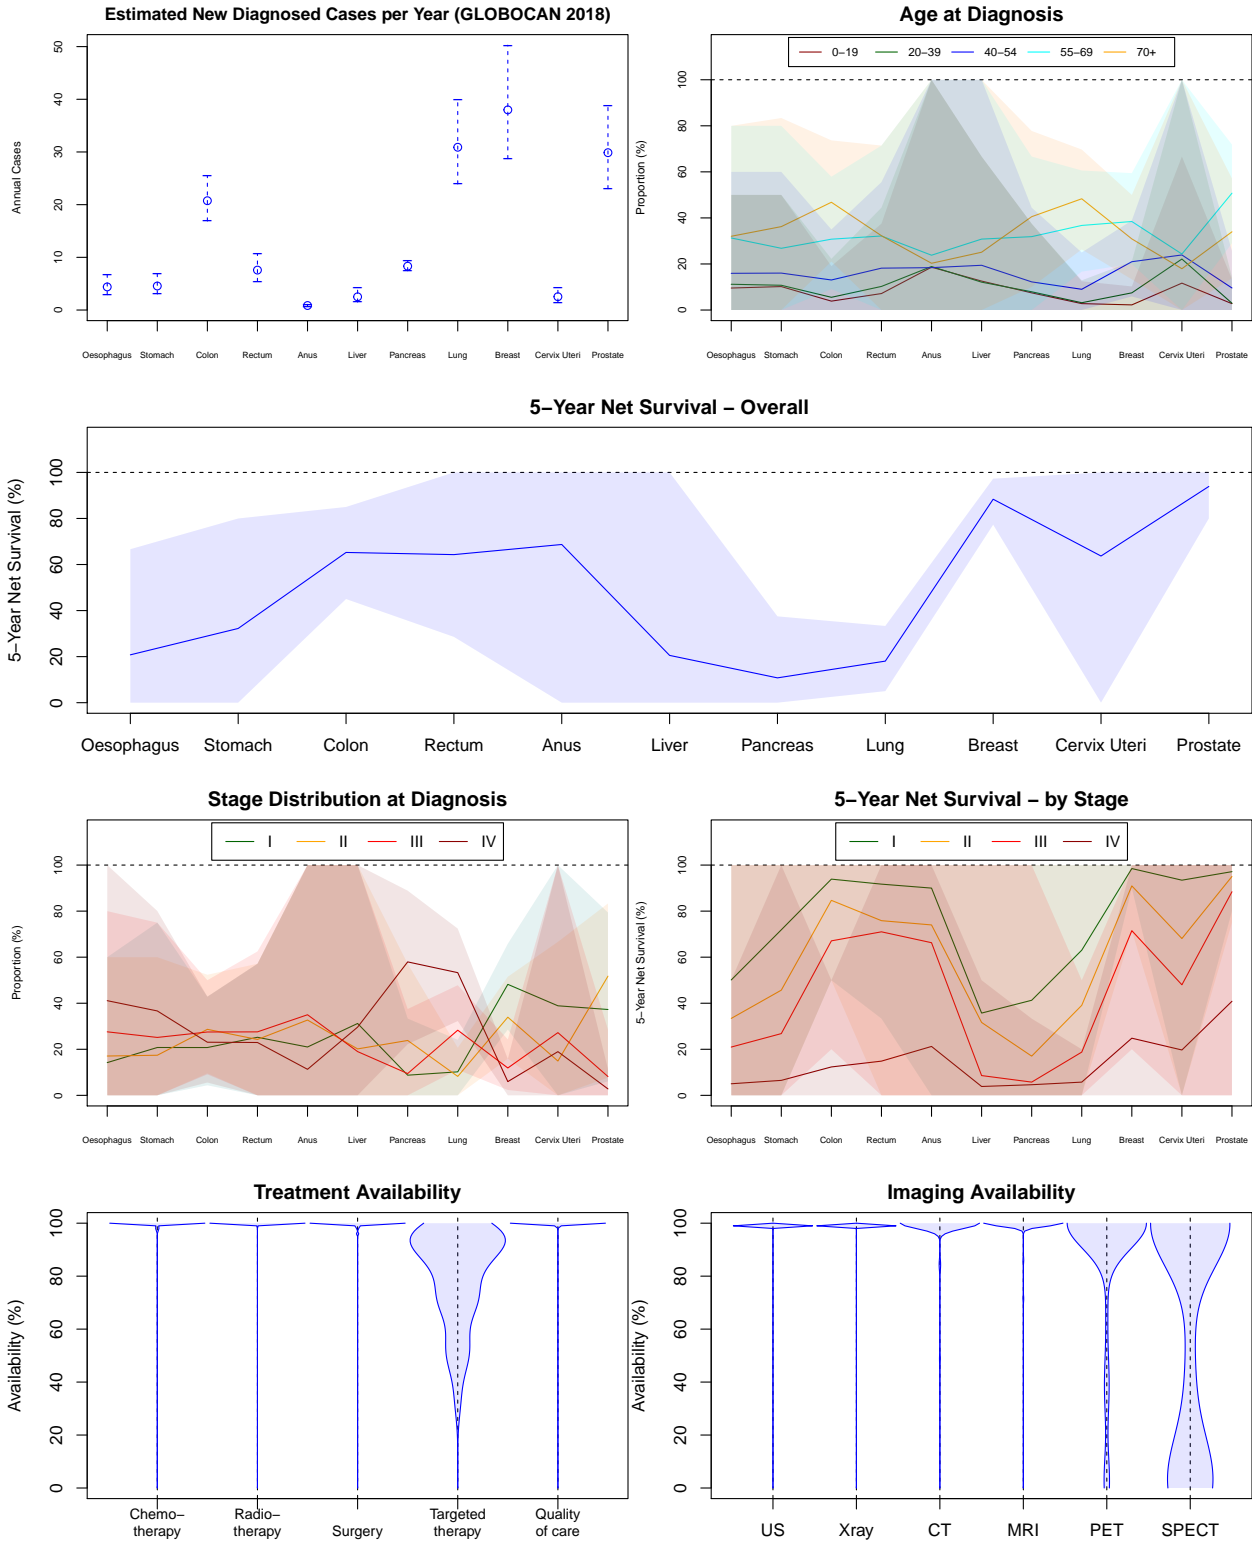

# Grenada

| ISO Code | Region    | Area                            | Income Group        |
|----------|-----------|---------------------------------|---------------------|
| GRD      | Caribbean | Latin America and the Caribbean | Upper middle income |

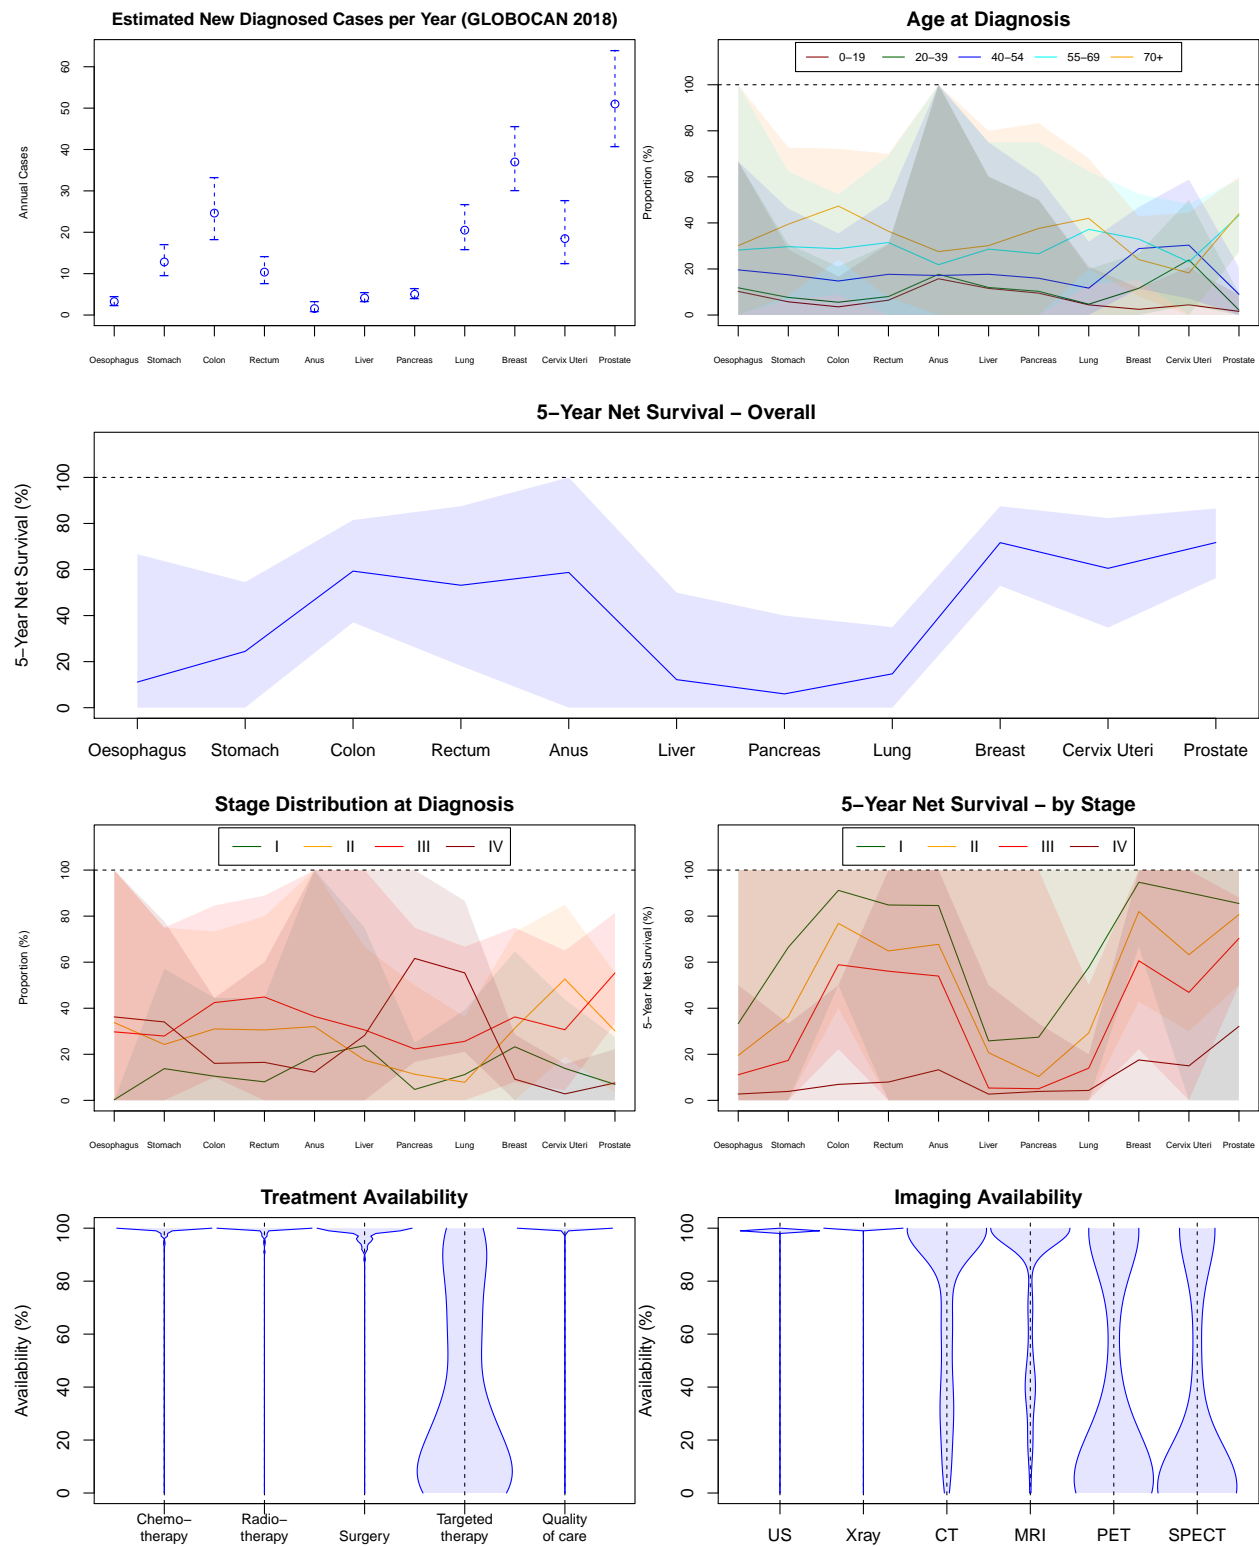

# Guatemala

| ISO Code | Region          | Area                            | Income Group        |
|----------|-----------------|---------------------------------|---------------------|
| GTM      | Central America | Latin America and the Caribbean | Upper middle income |

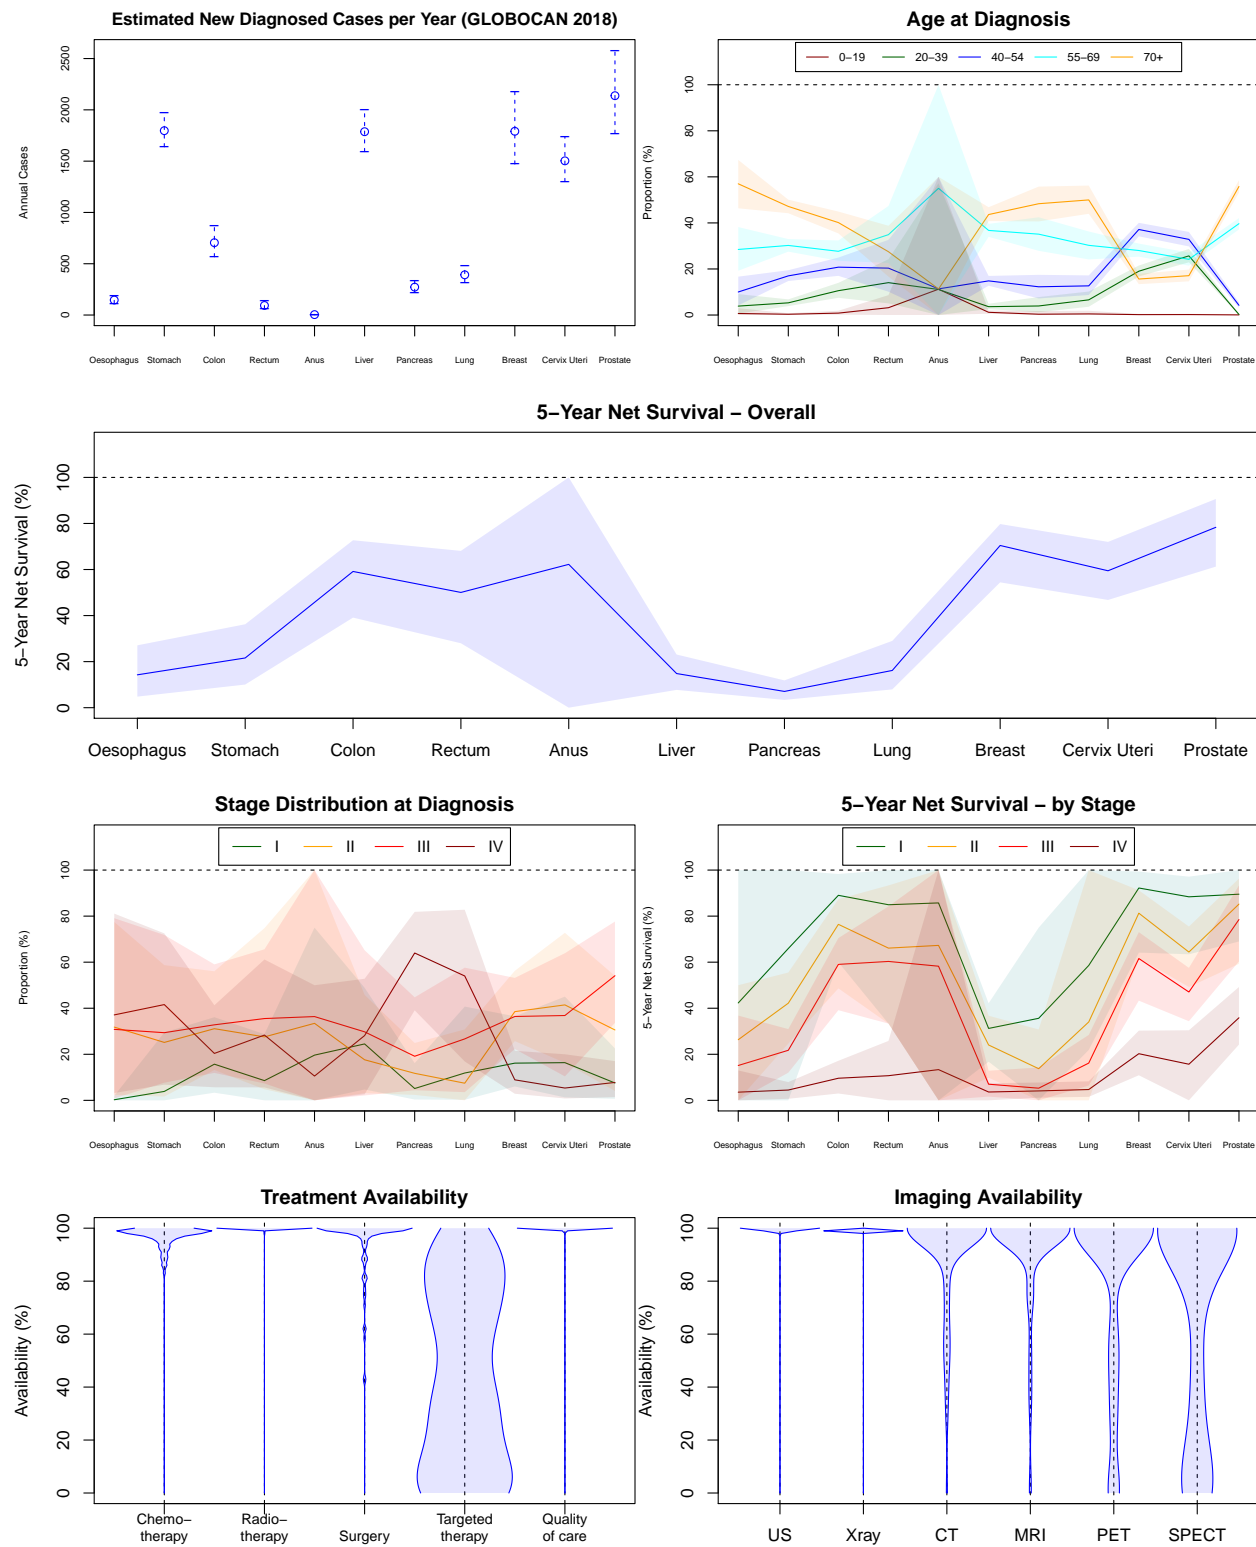



# Guinea

| ISO Code | Region         | Area   | Income Group |
|----------|----------------|--------|--------------|
| GIN      | Western Africa | Africa | Low income   |

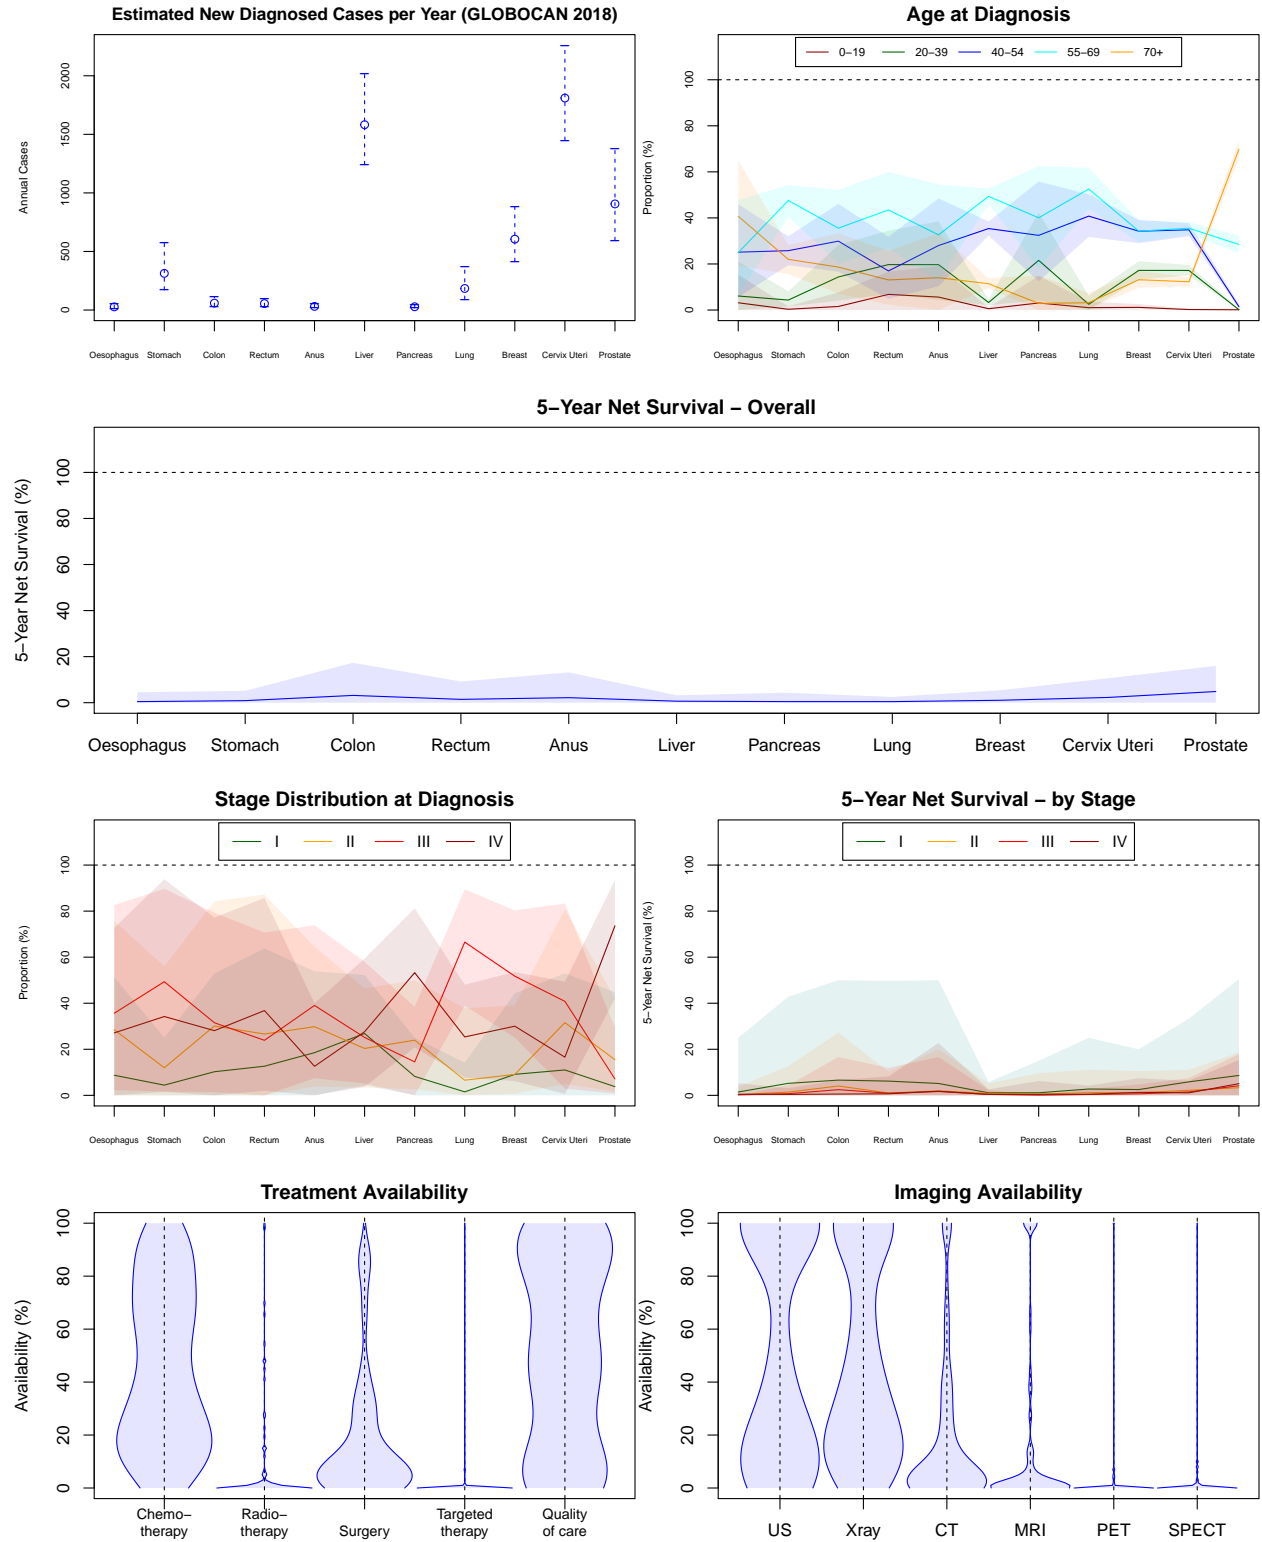

# Guinea-Bissau

| ISO Code | Region         | Area   | Income Group |
|----------|----------------|--------|--------------|
| GNB      | Western Africa | Africa | Low income   |

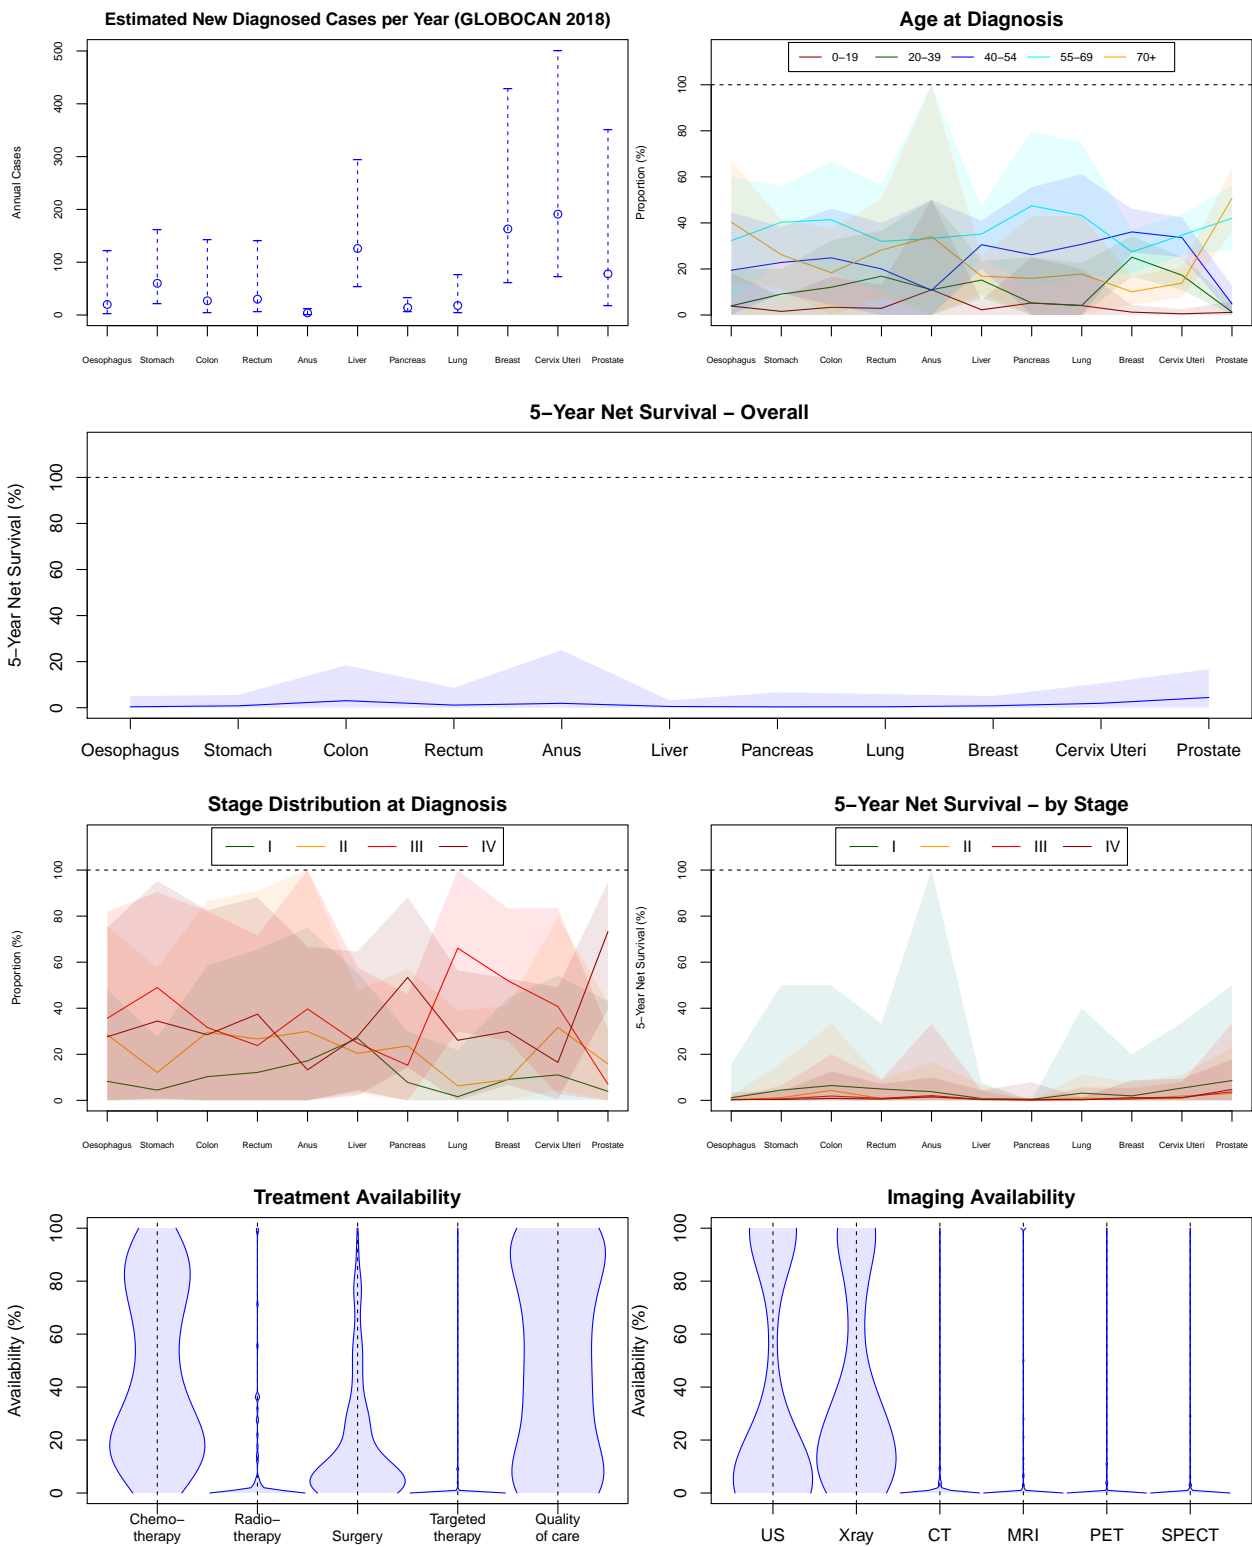

# Guyana

| ISO Code | Region        | Area                            | Income Group        |
|----------|---------------|---------------------------------|---------------------|
| GUY      | South America | Latin America and the Caribbean | Upper middle income |

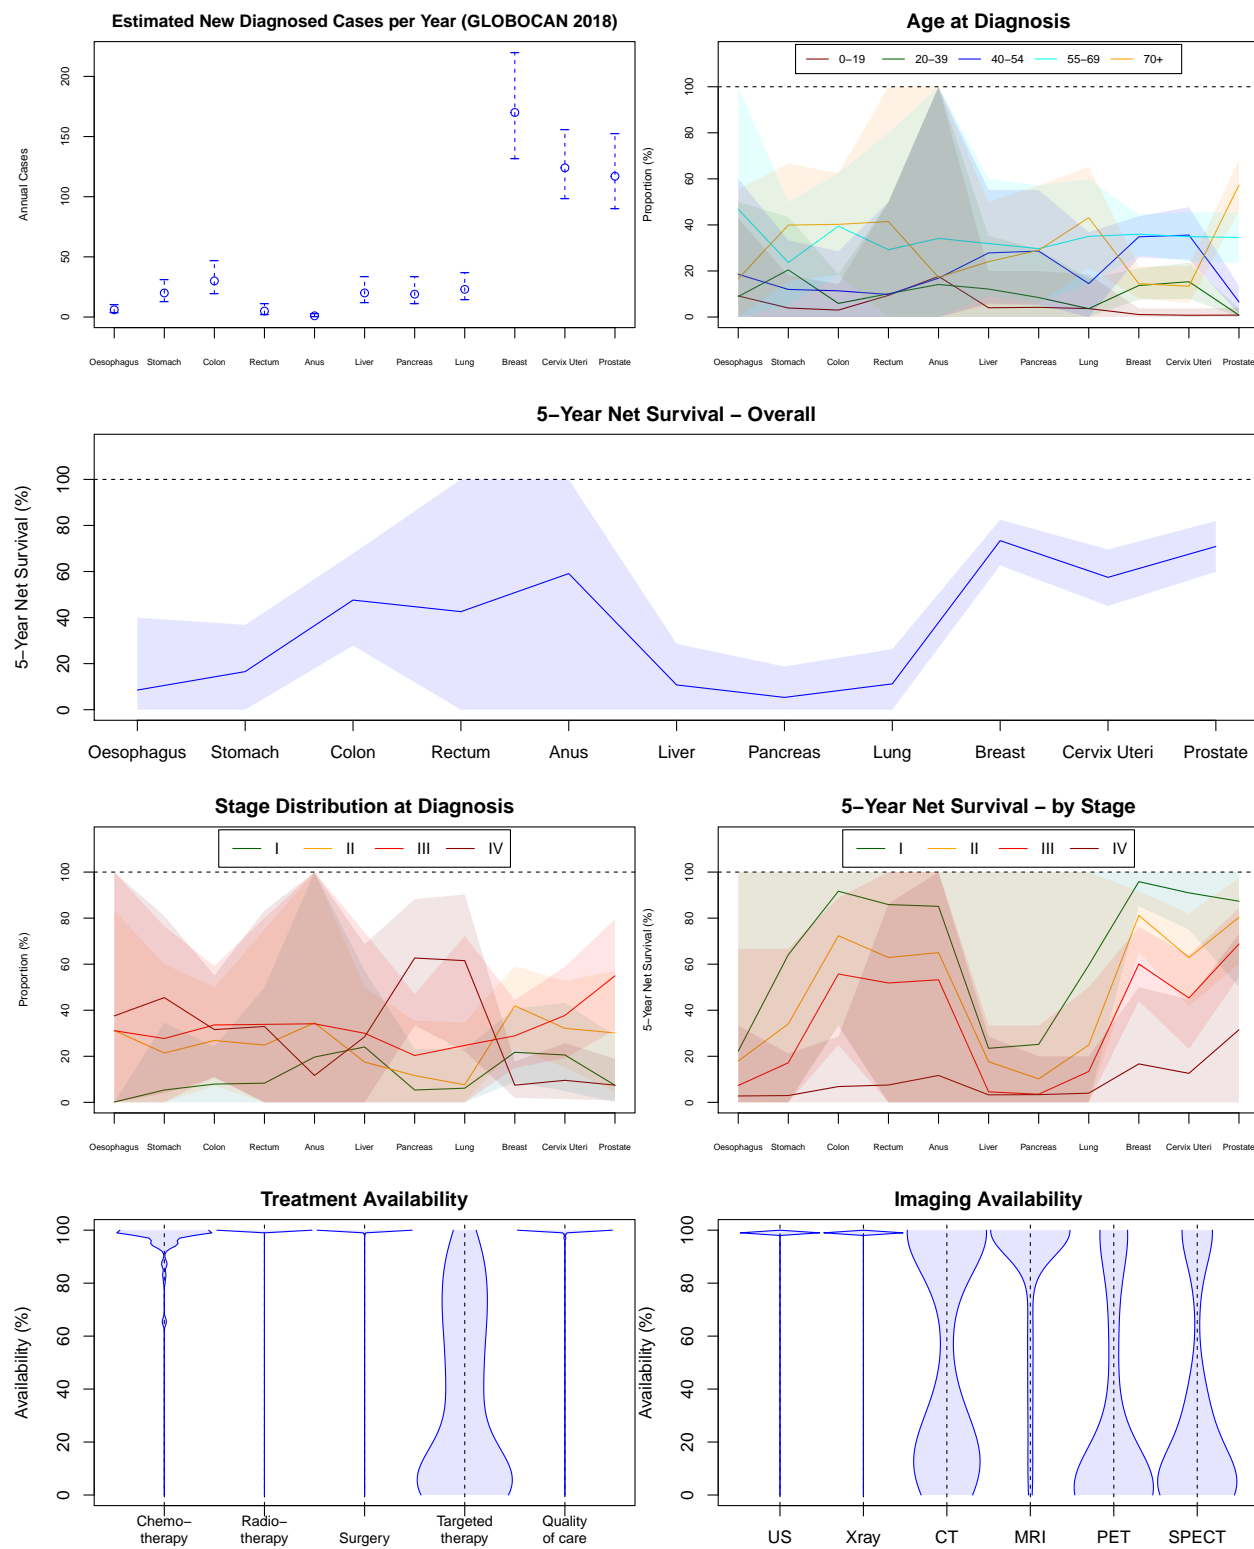

# Haiti

| ISO Code | Region    | Area                            | Income Group |
|----------|-----------|---------------------------------|--------------|
| HTI      | Caribbean | Latin America and the Caribbean | Low income   |

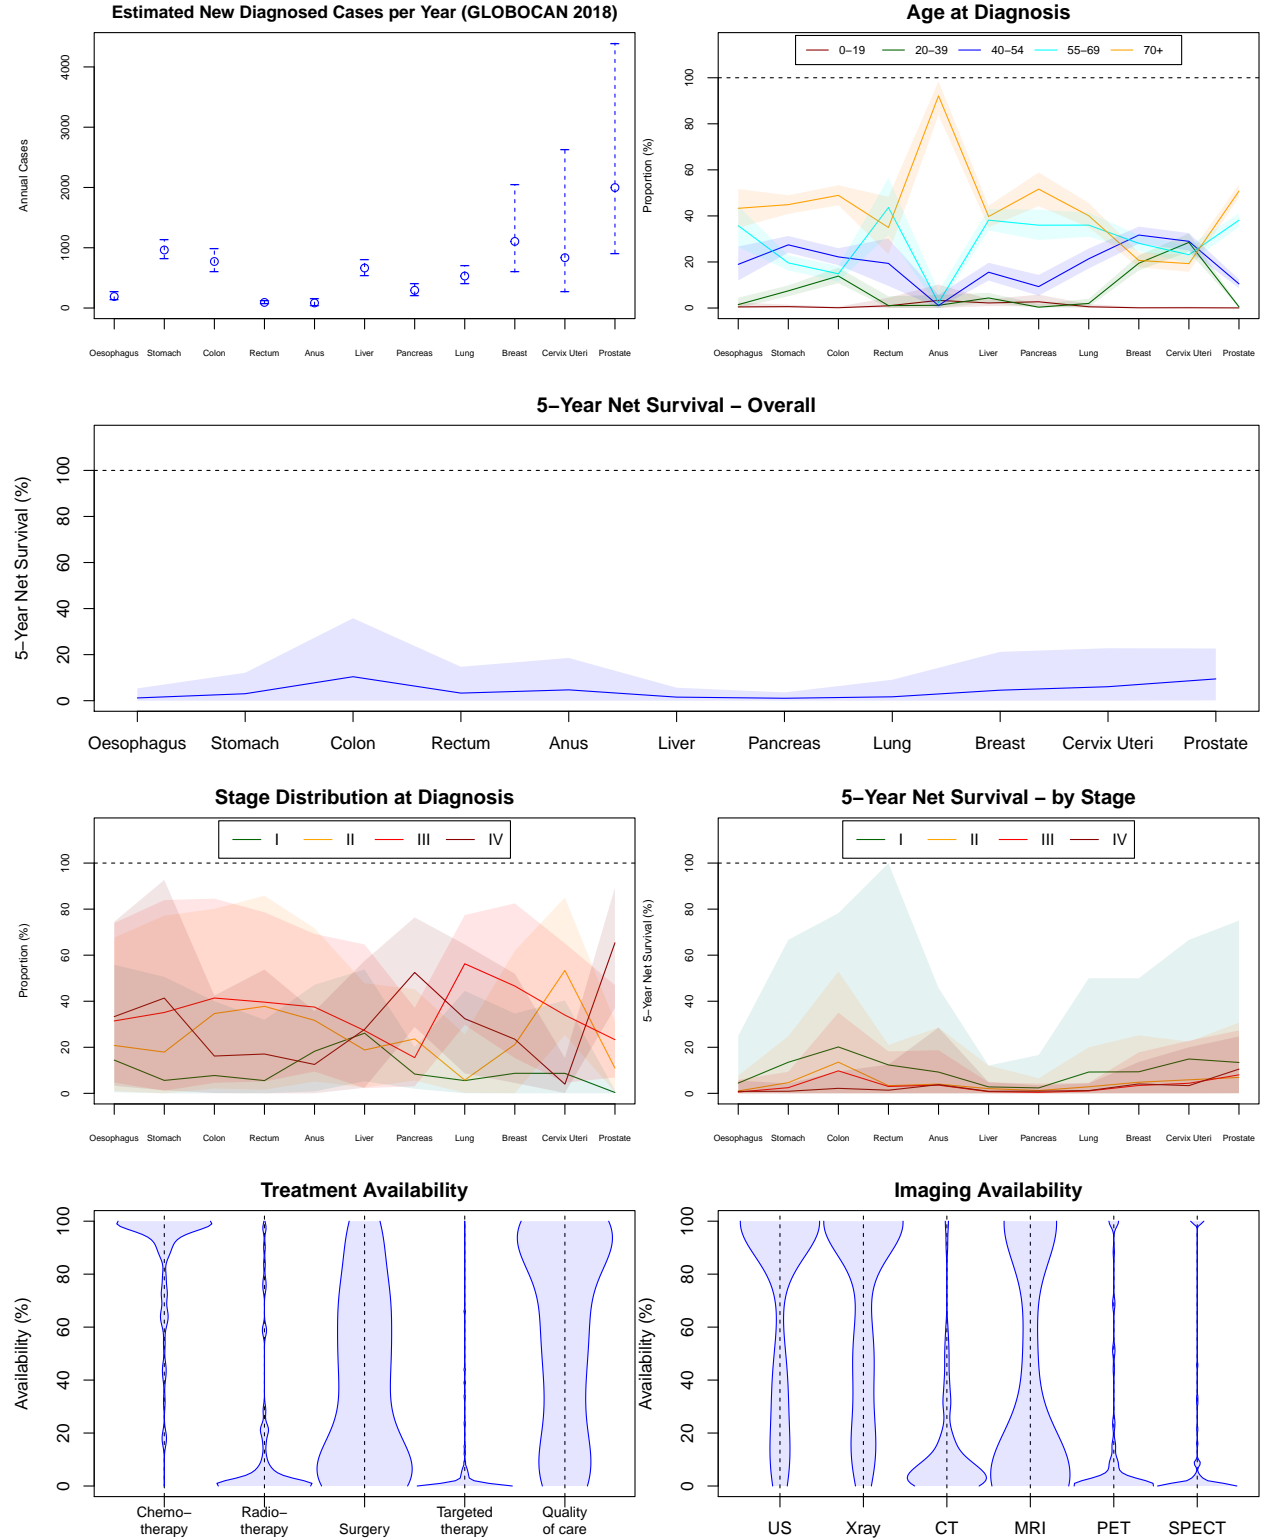

# Honduras

| ISO Code | Region          | Area                            | Income Group        |
|----------|-----------------|---------------------------------|---------------------|
| HND      | Central America | Latin America and the Caribbean | Lower middle income |

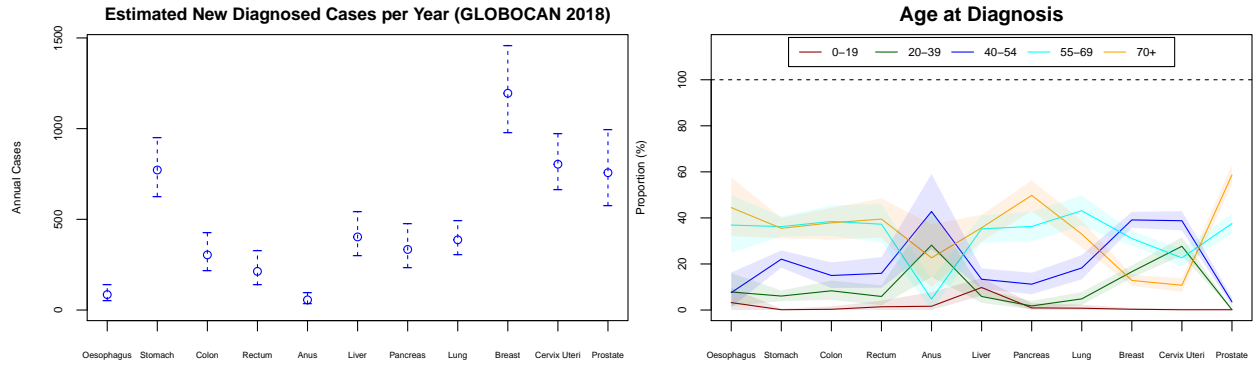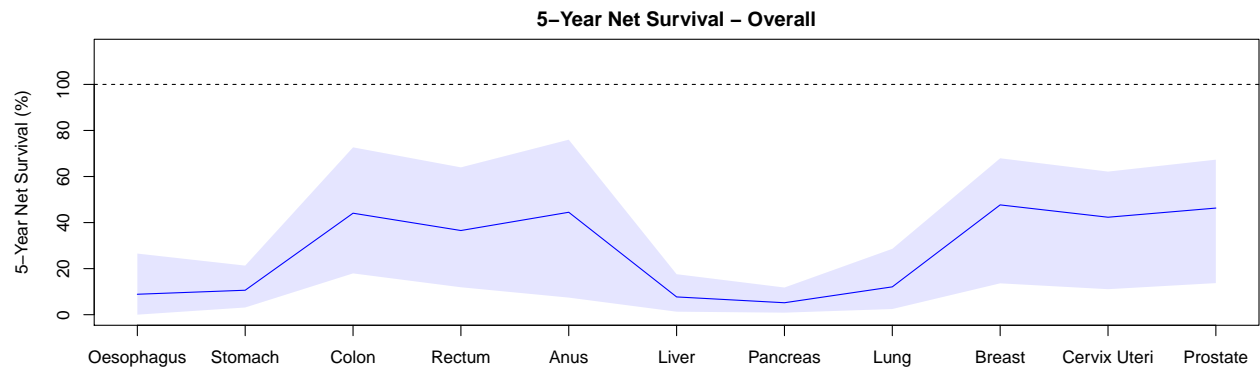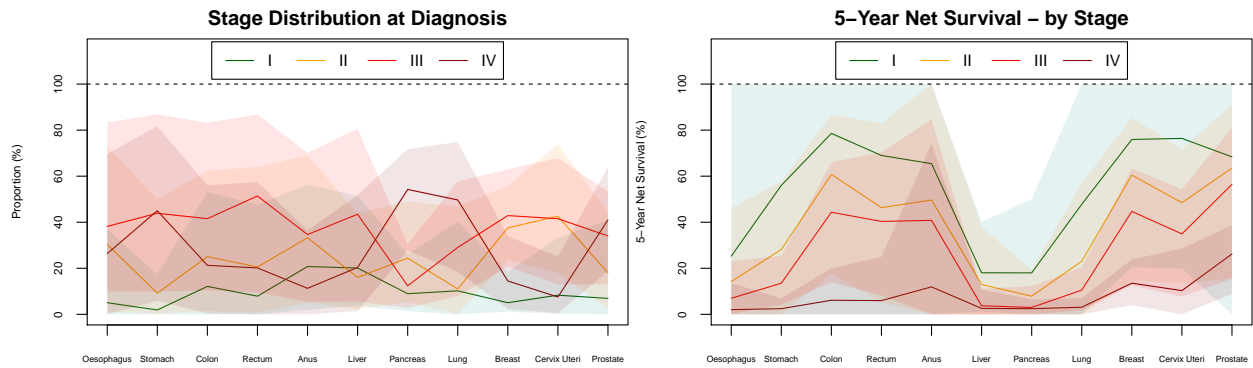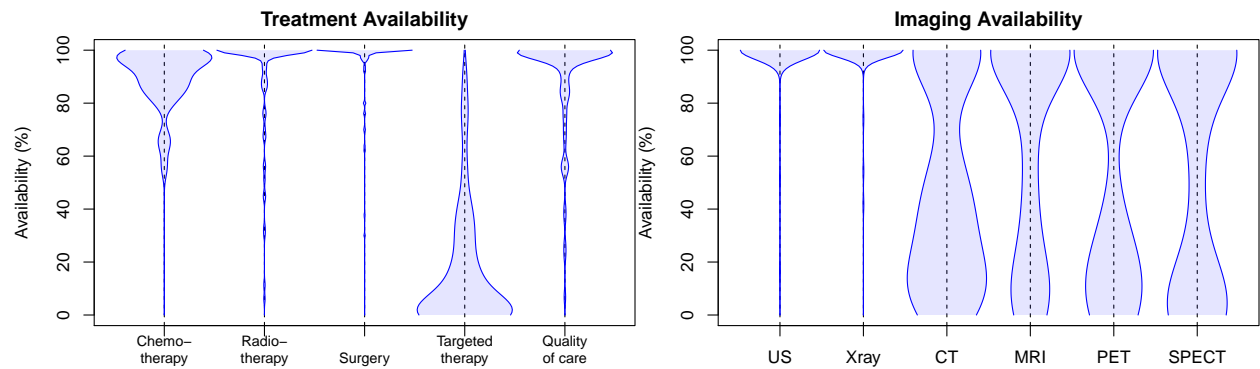

# Hungary

| ISO Code | Region         | Area   | Income Group |
|----------|----------------|--------|--------------|
| HUN      | Eastern Europe | Europe | High income  |

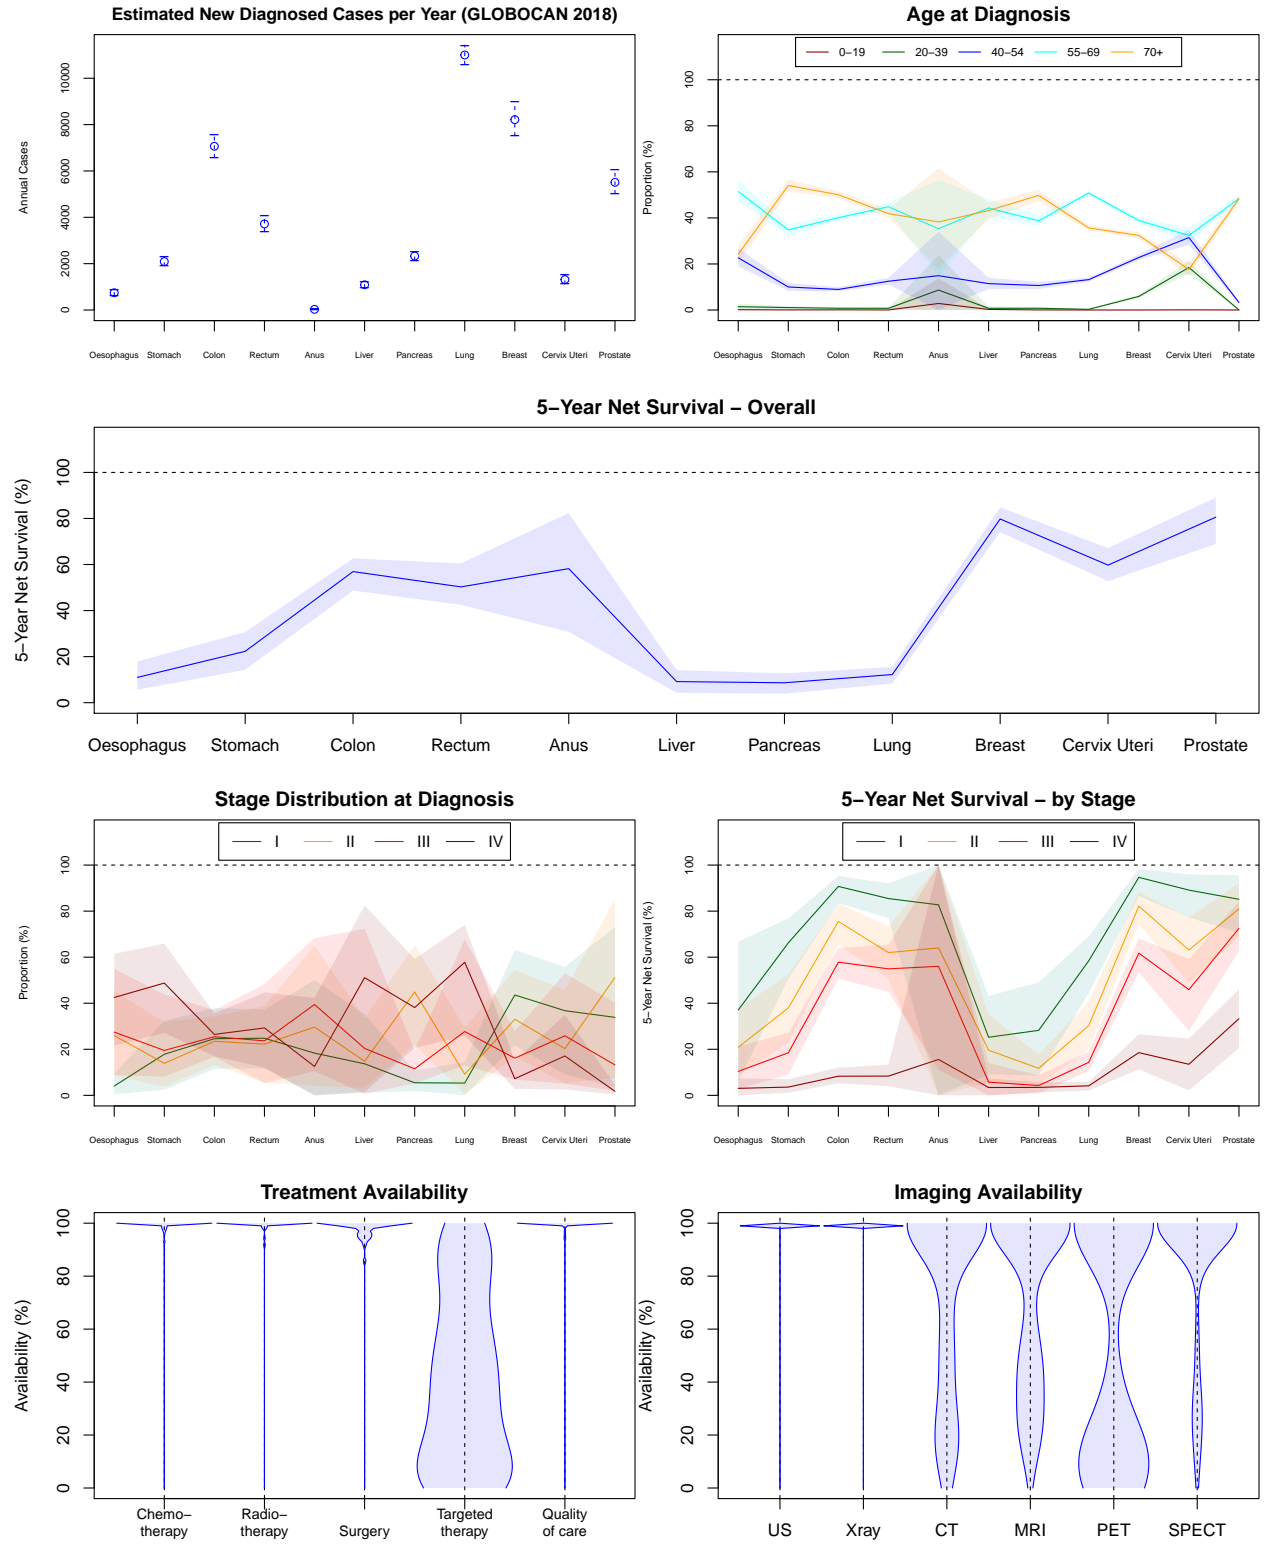

# Iceland

| ISO Code | Region          | Area   | Income Group |
|----------|-----------------|--------|--------------|
| ISL      | Northern Europe | Europe | High income  |

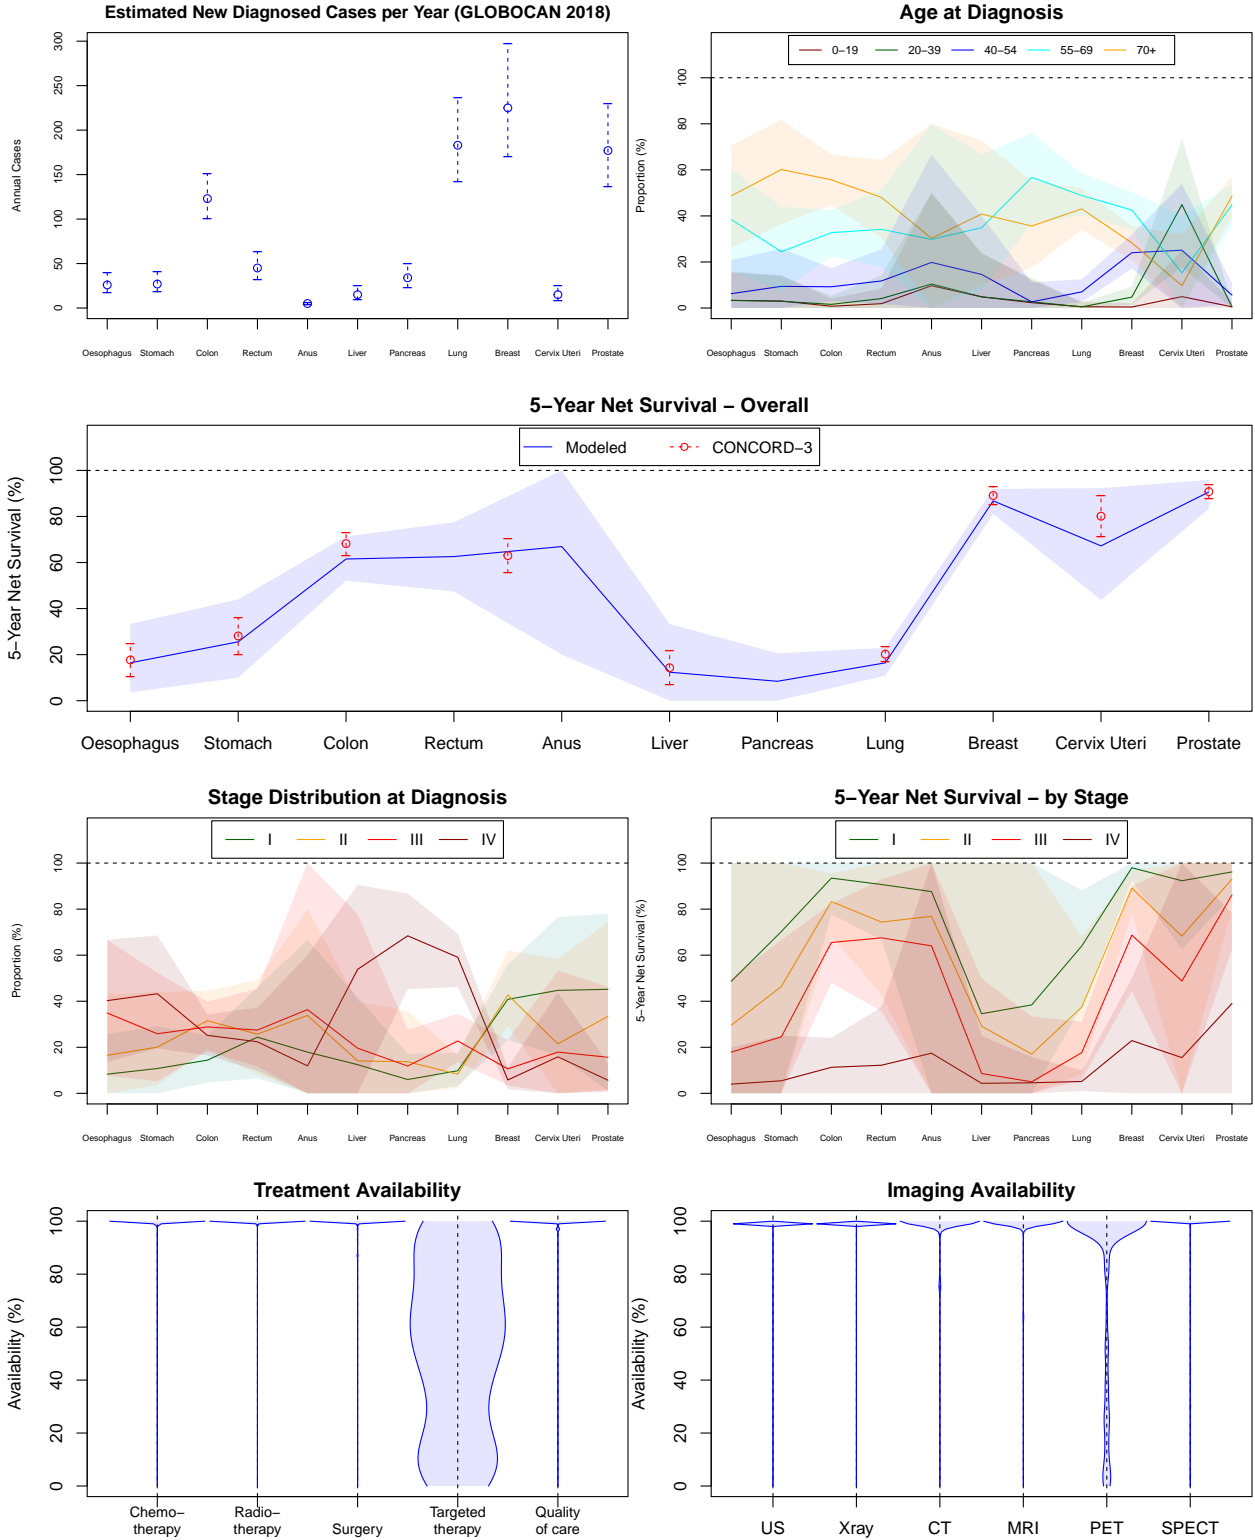

# India

| ISO Code | Region        | Area | Income Group        |
|----------|---------------|------|---------------------|
| IND      | Southern Asia | Asia | Lower middle income |

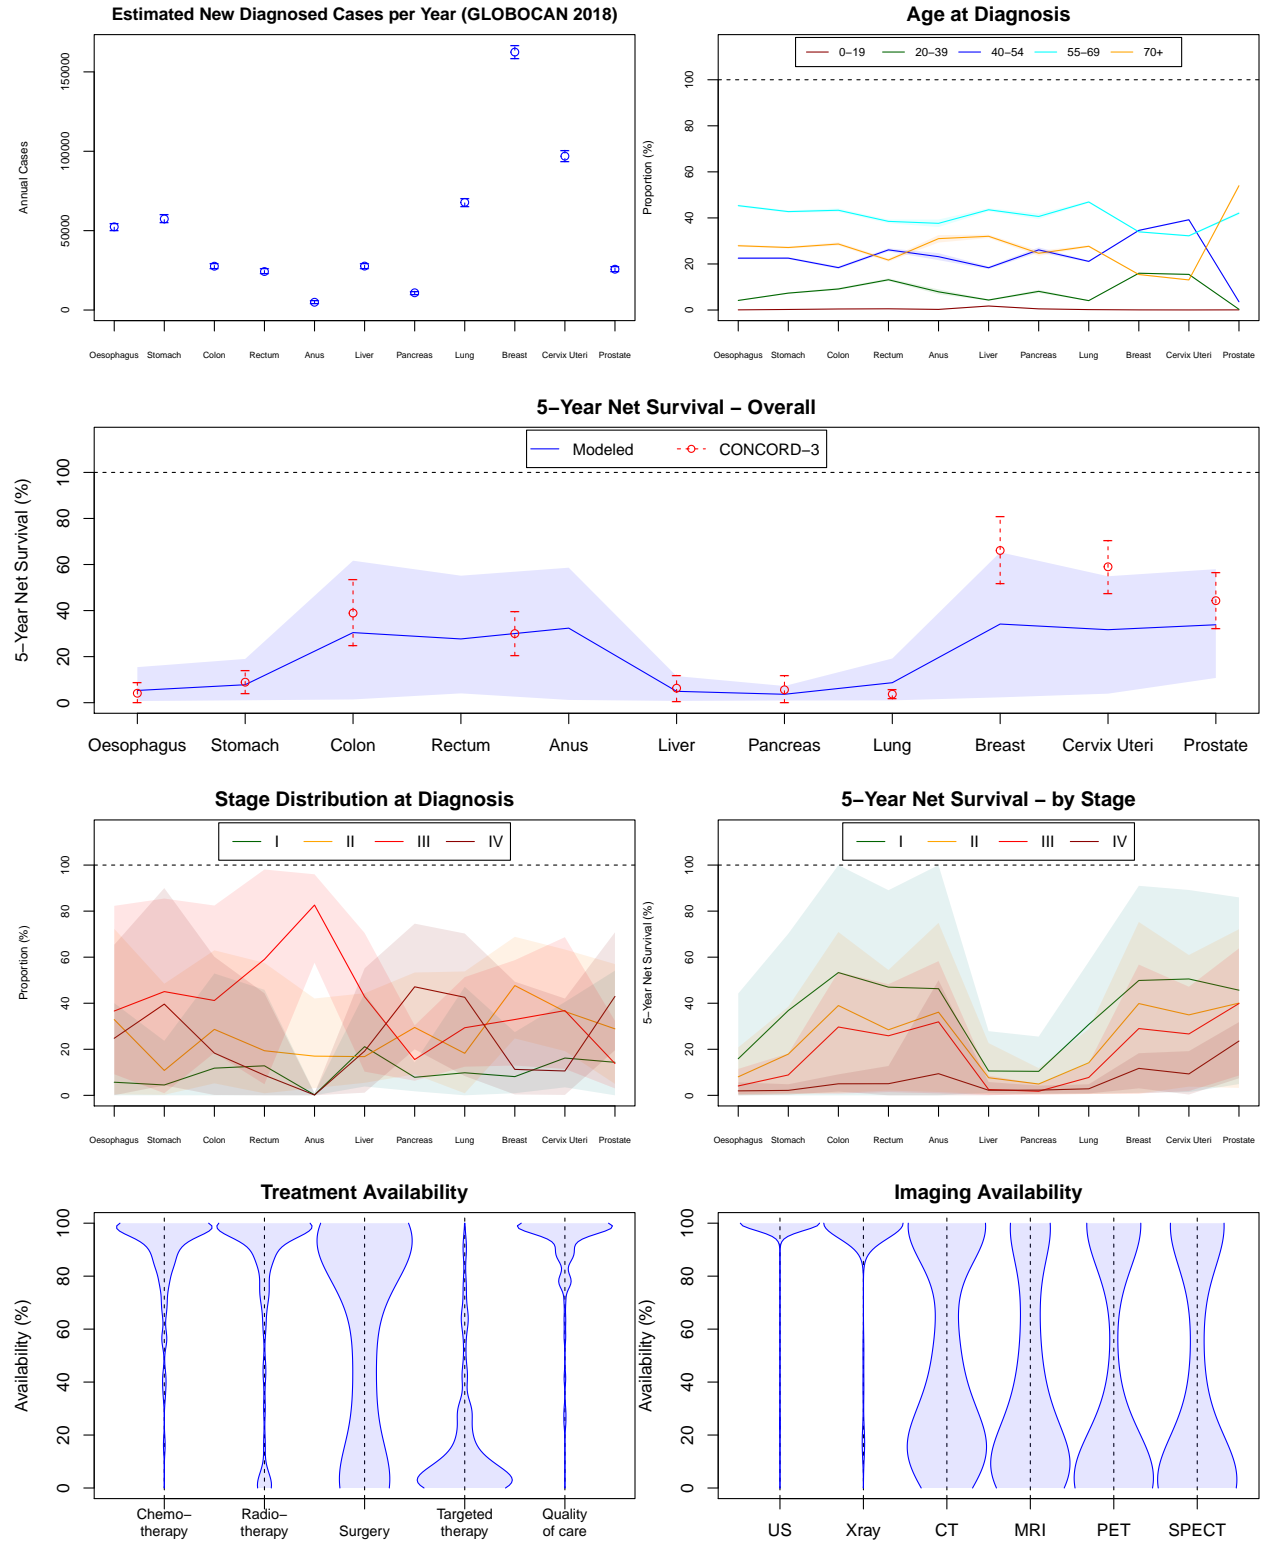



# Indonesia

| ISO Code | Region             | Area | Income Group        |
|----------|--------------------|------|---------------------|
| IDN      | South-Eastern Asia | Asia | Lower middle income |

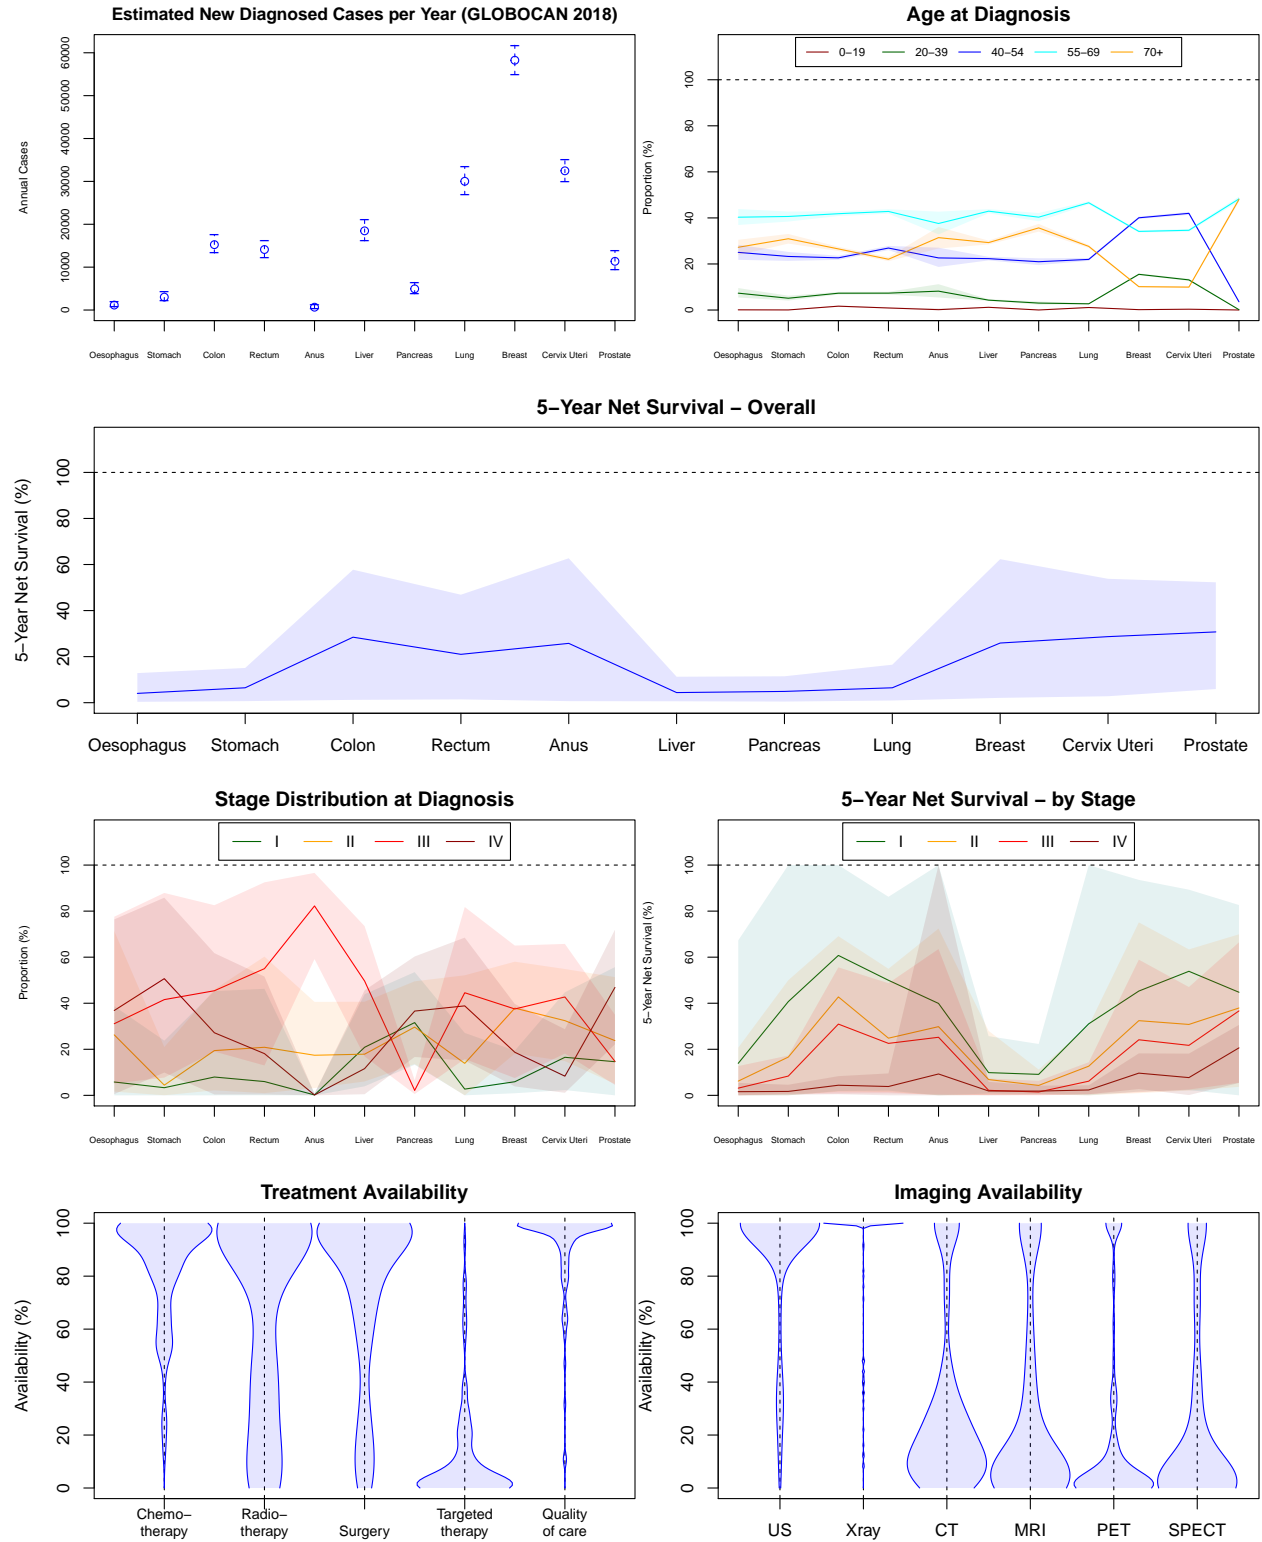

# Iran (Islamic Republic of)

| ISO Code | Region        | Area | Income Group        |
|----------|---------------|------|---------------------|
| IRN      | Southern Asia | Asia | Upper middle income |

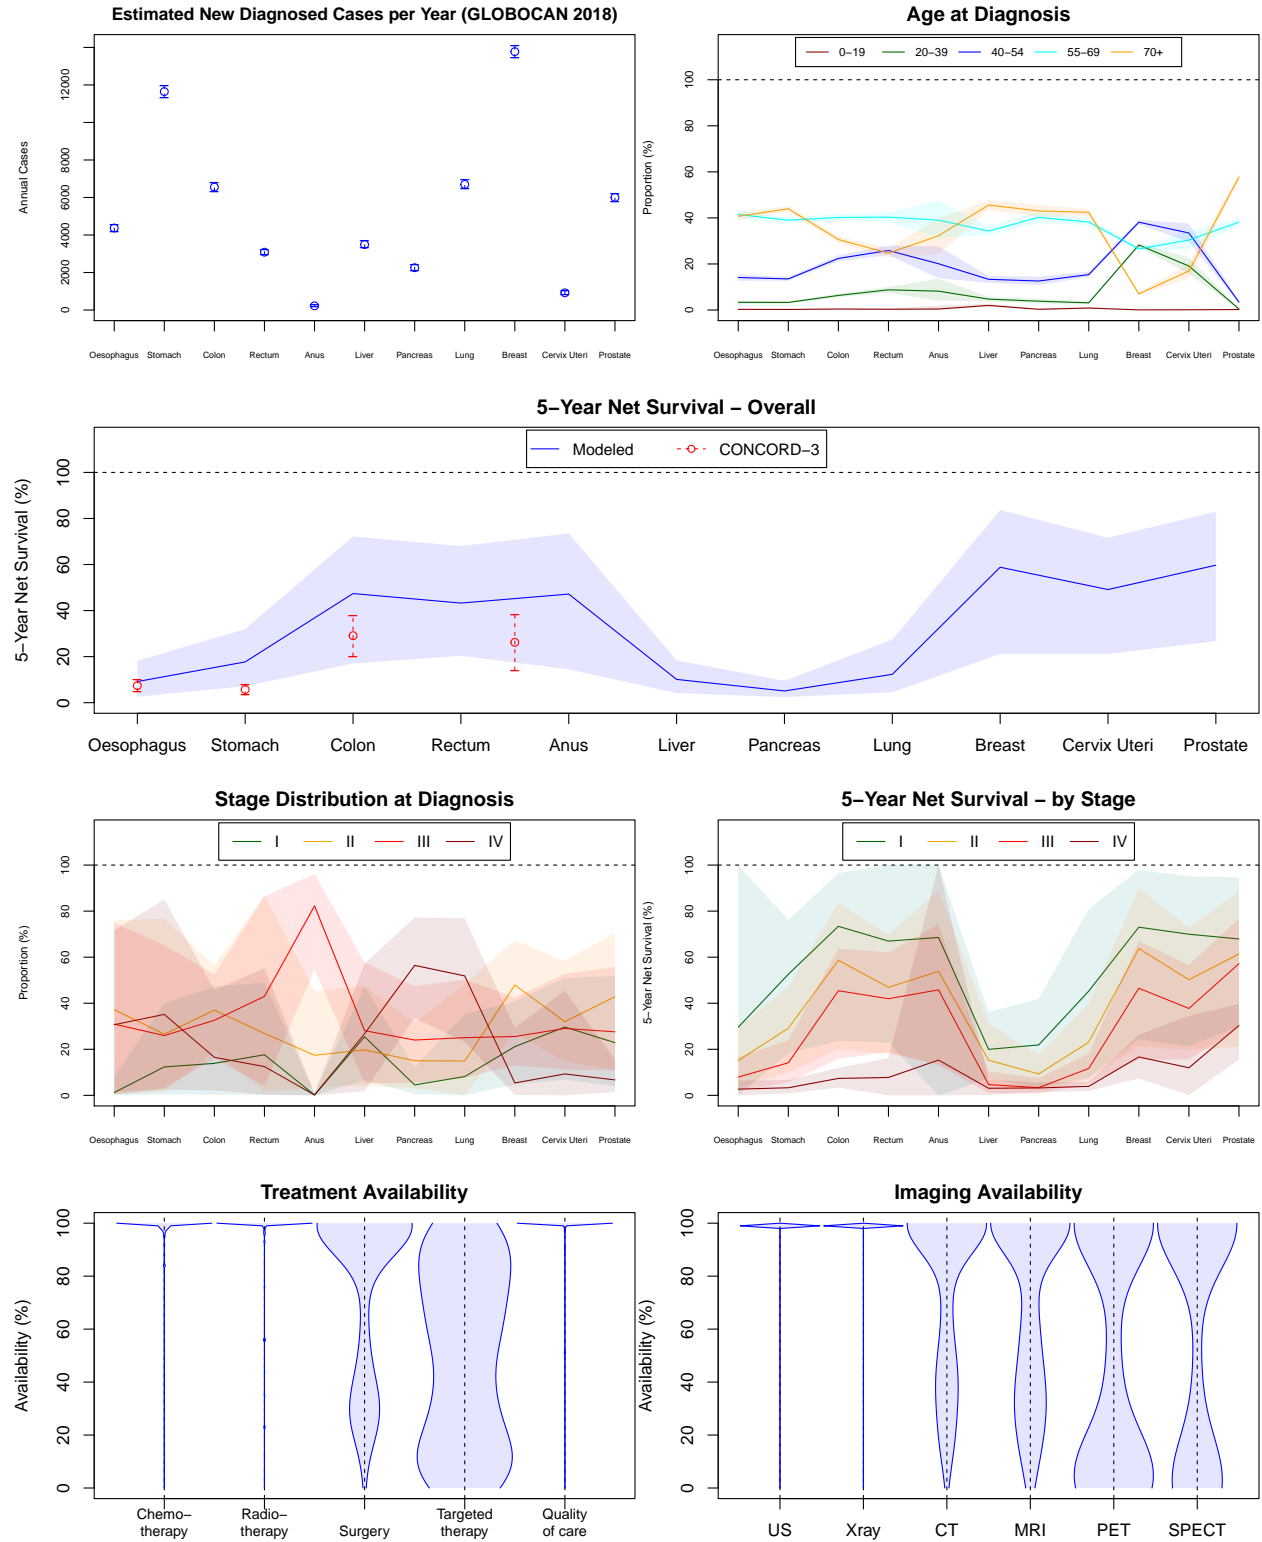

# Iraq

| ISO Code | Region       | Area | Income Group        |
|----------|--------------|------|---------------------|
| IRQ      | Western Asia | Asia | Upper middle income |

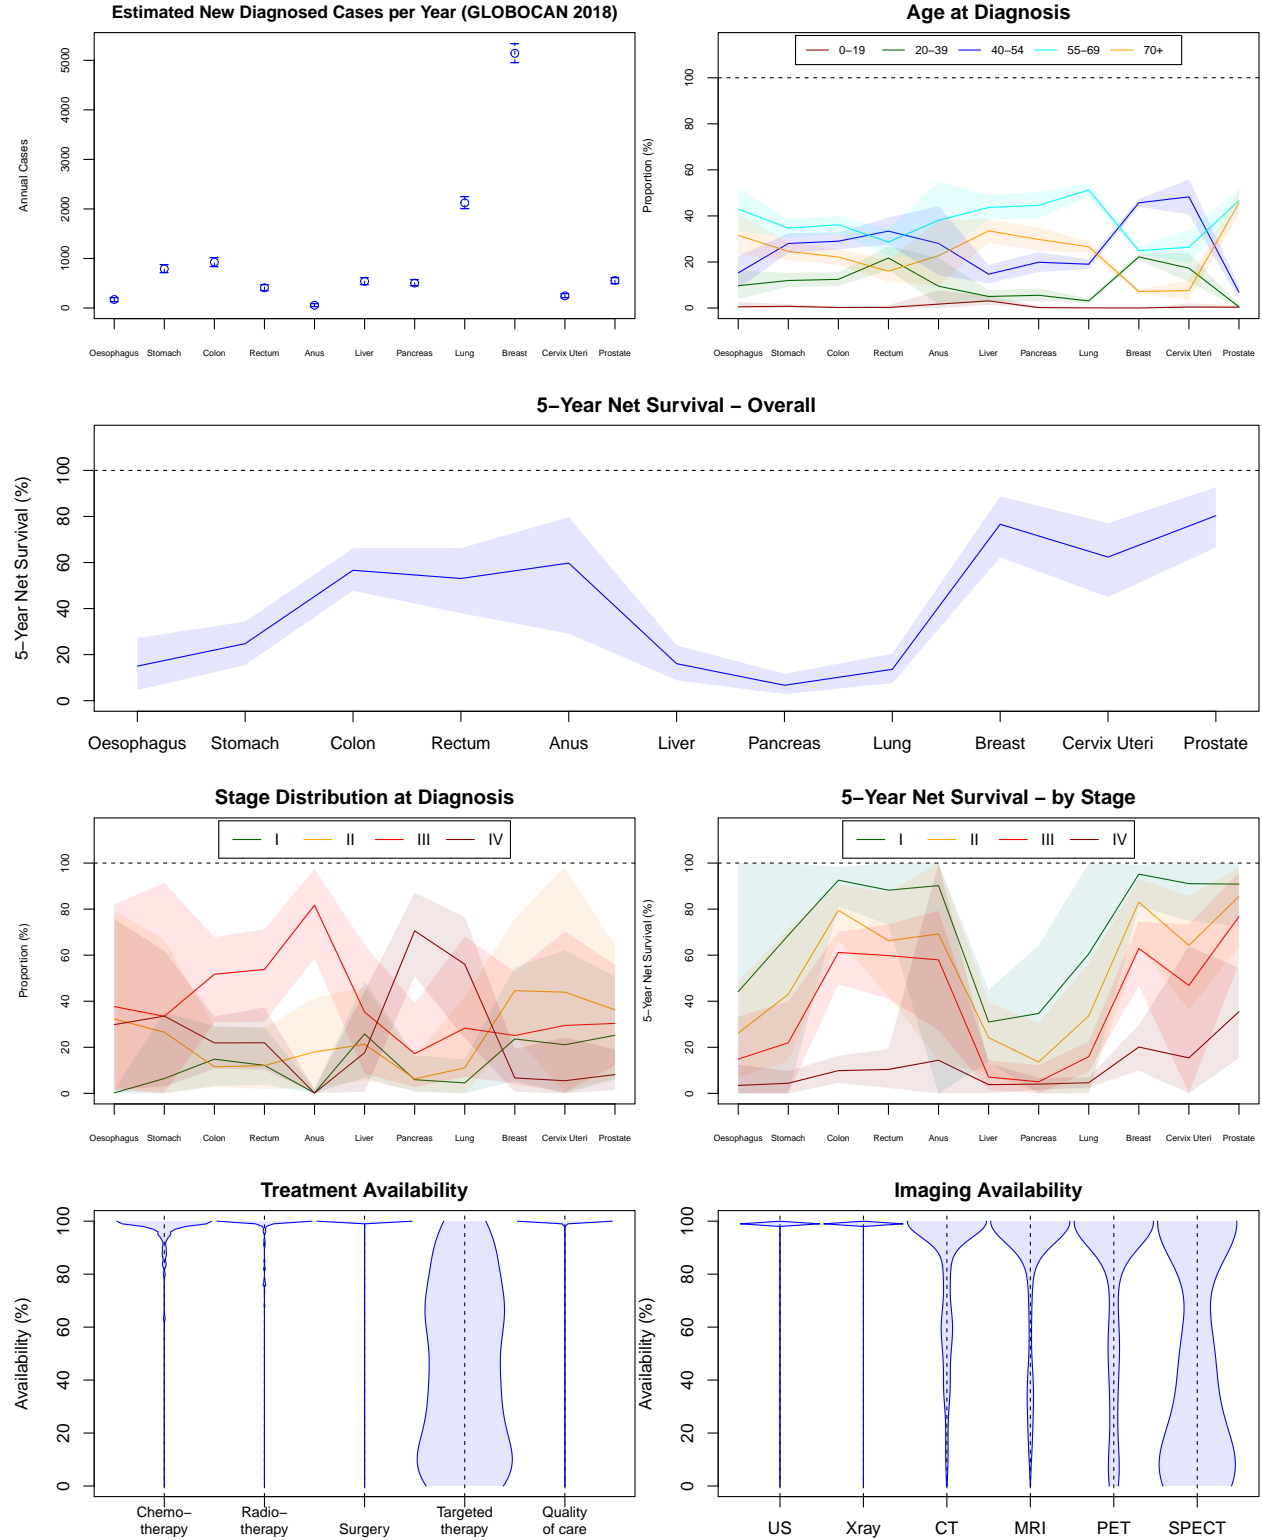

# Ireland

| ISO Code | Region          | Area   | Income Group |
|----------|-----------------|--------|--------------|
| IRL      | Northern Europe | Europe | High income  |

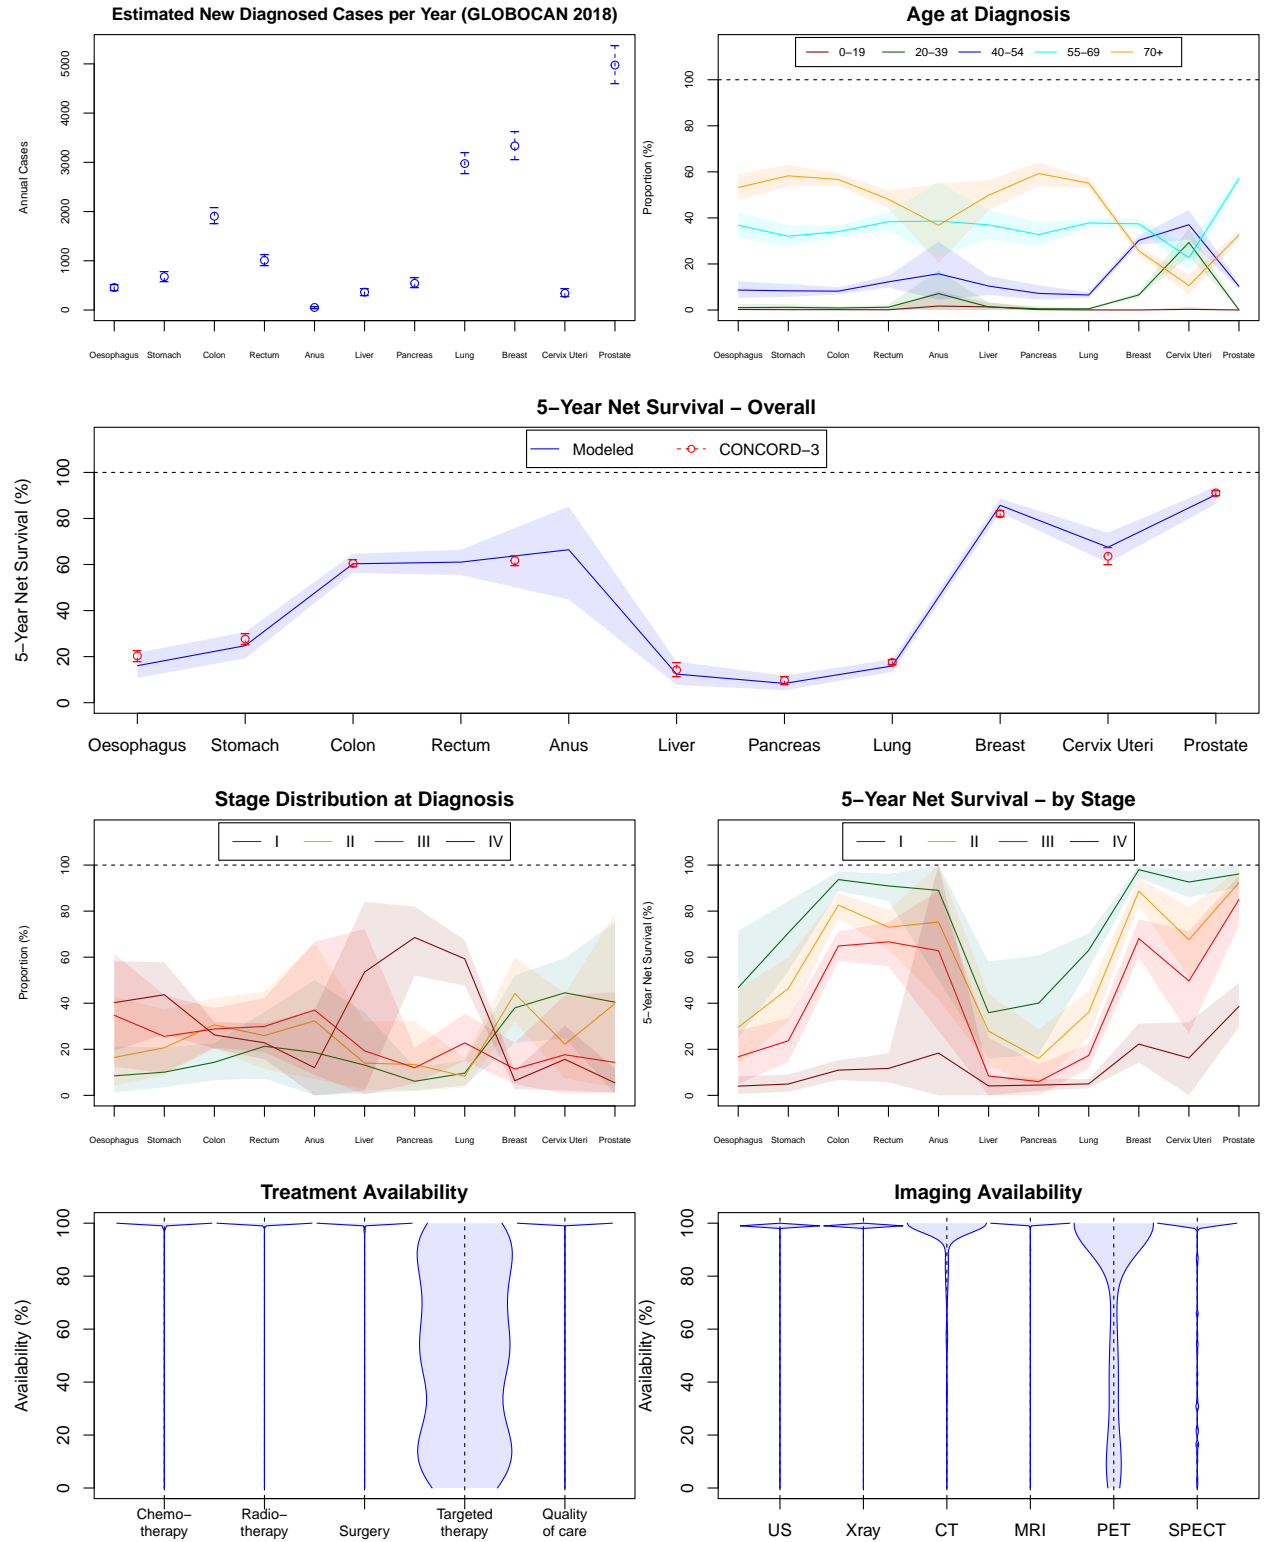

# Israel

| ISO Code | Region       | Area | Income Group |
|----------|--------------|------|--------------|
| ISR      | Western Asia | Asia | High income  |

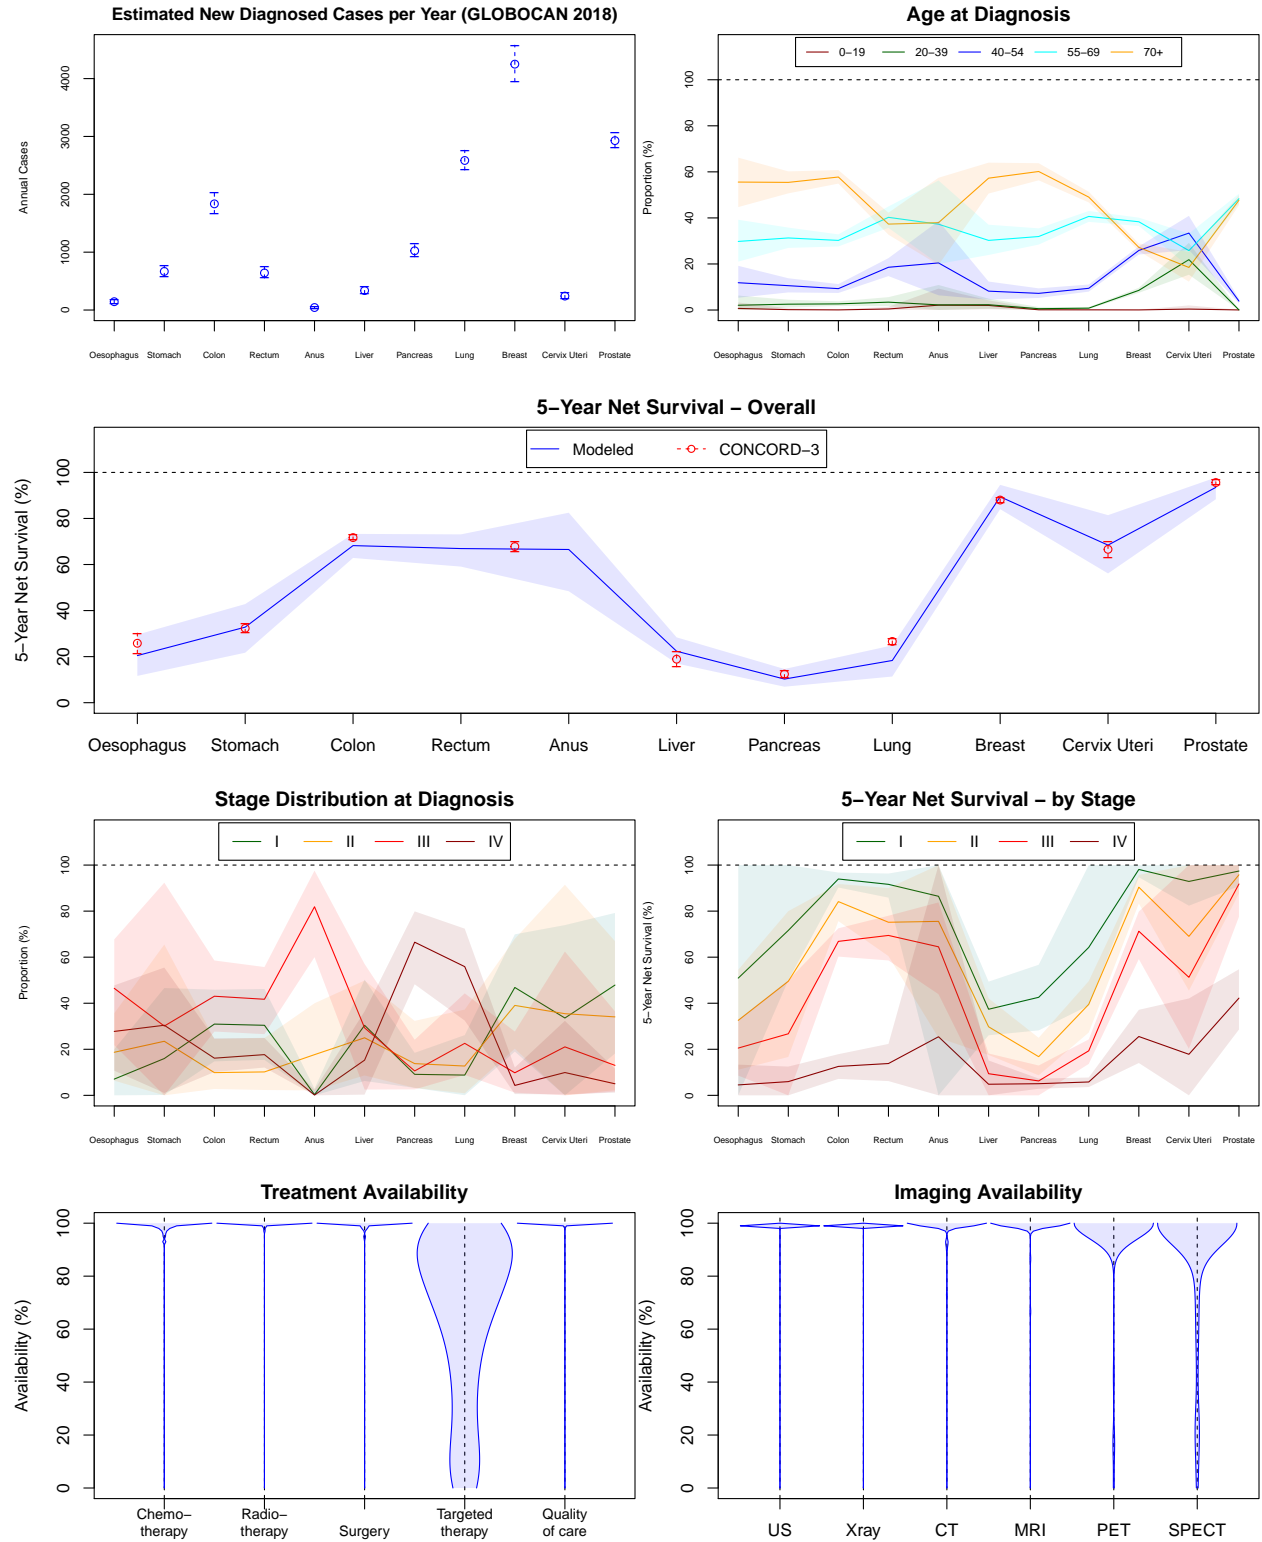

# Italy

| ISO Code | Region          | Area   | Income Group |
|----------|-----------------|--------|--------------|
| ITA      | Southern Europe | Europe | High income  |

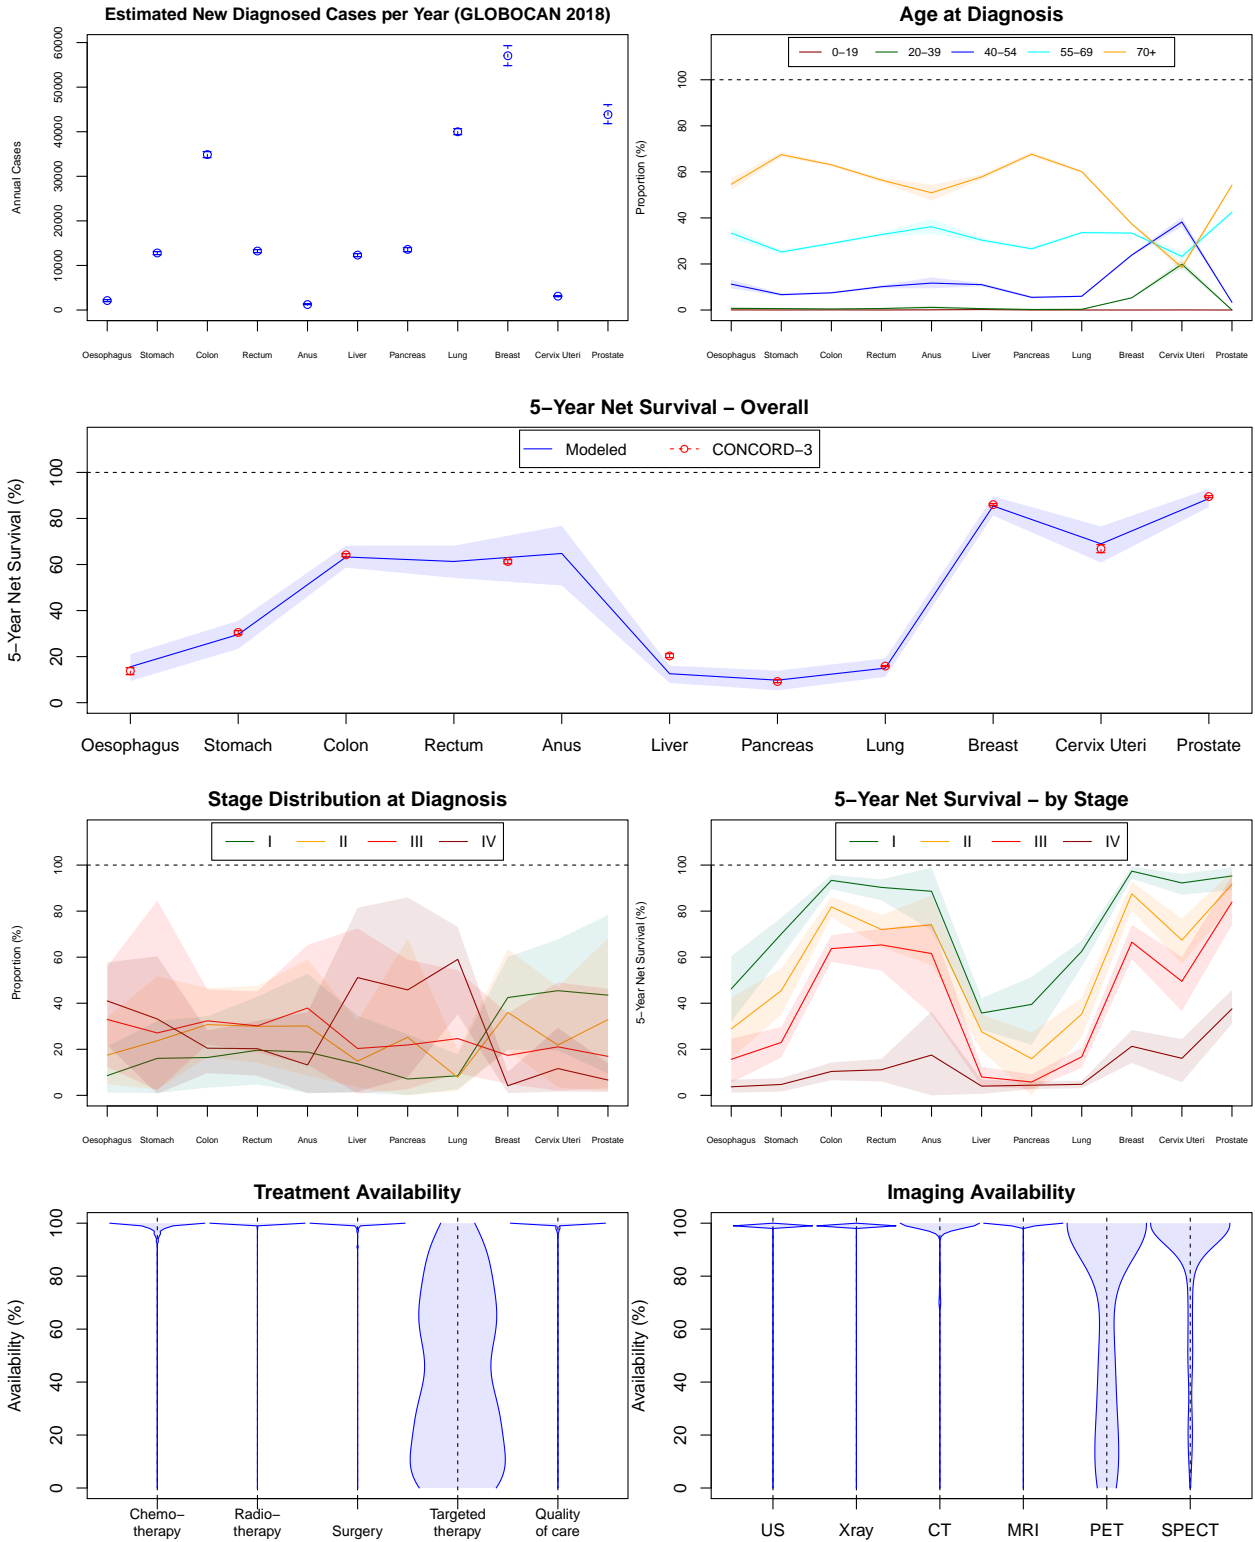

# Jamaica

| ISO Code | Region    | Area                            | Income Group        |
|----------|-----------|---------------------------------|---------------------|
| JAM      | Caribbean | Latin America and the Caribbean | Upper middle income |

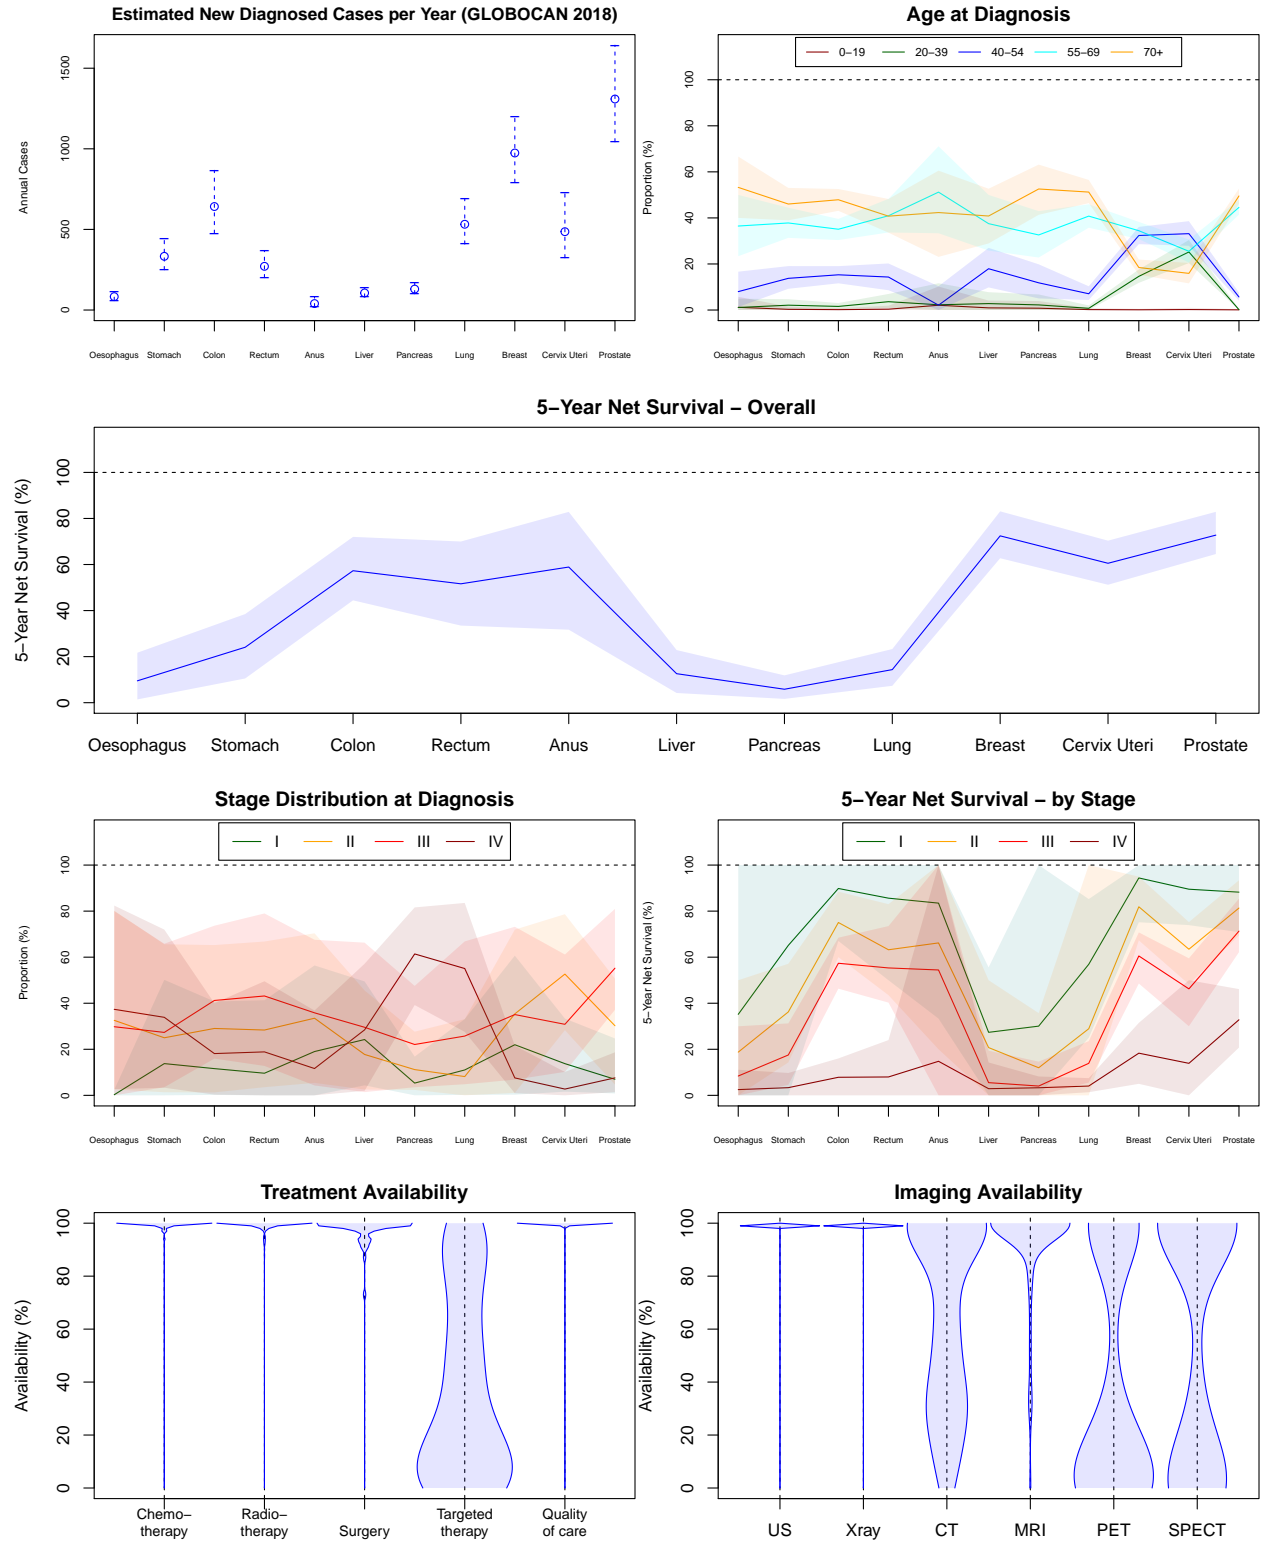

# Japan

| ISO Code | Region       | Area | Income Group |
|----------|--------------|------|--------------|
| JPN      | Eastern Asia | Asia | High income  |

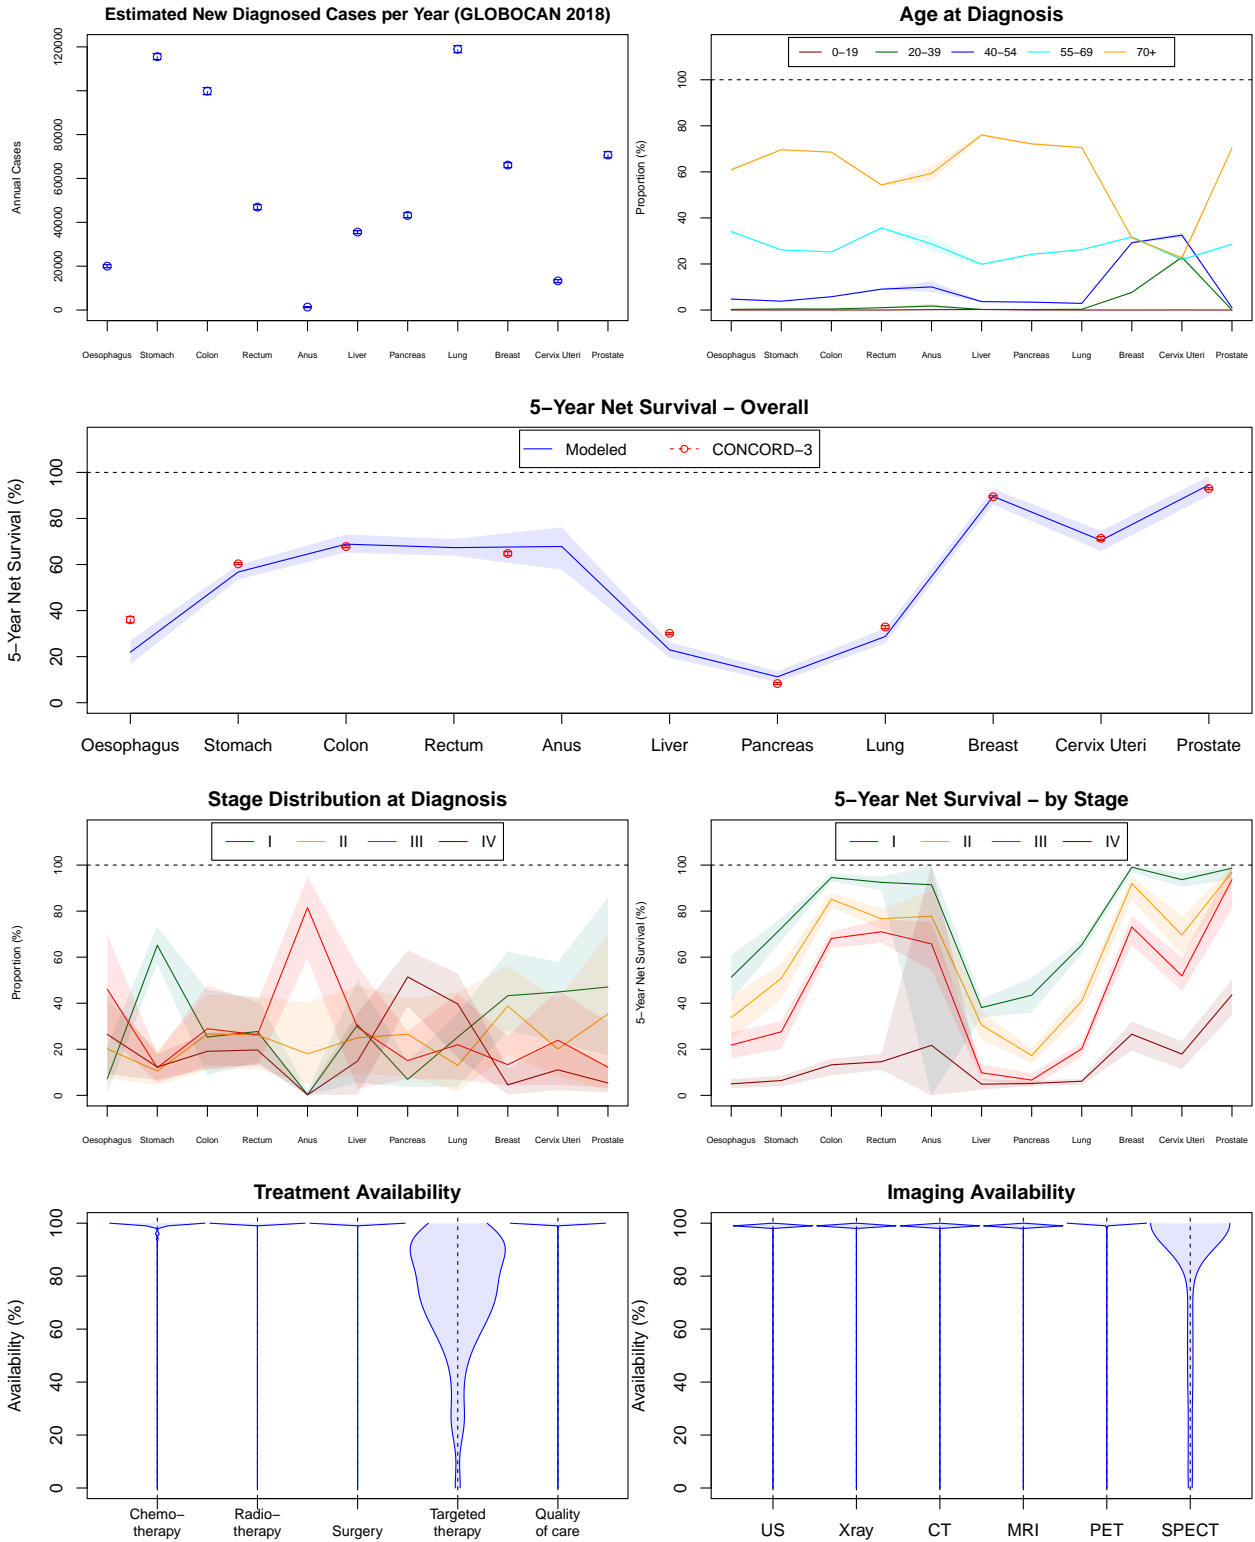



# Jordan

| ISO Code | Region       | Area | Income Group        |
|----------|--------------|------|---------------------|
| JOR      | Western Asia | Asia | Upper middle income |

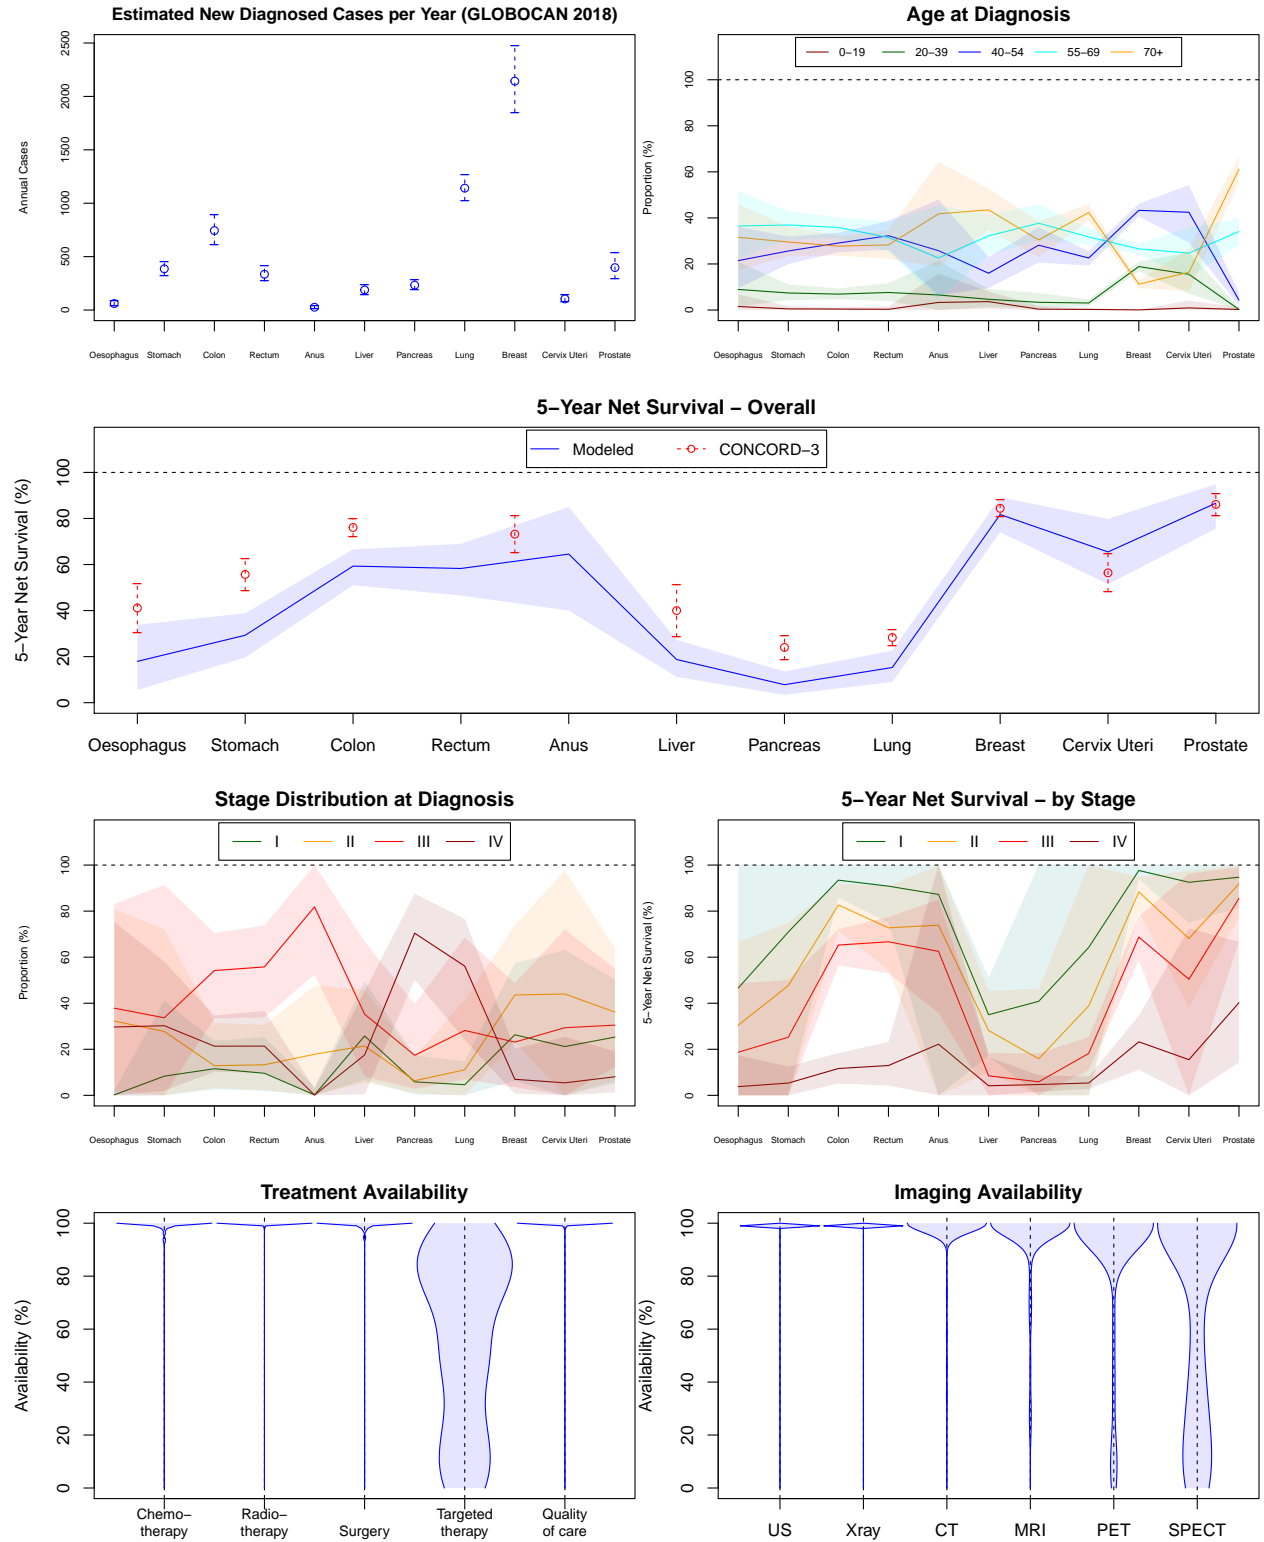

# Kazakhstan

| ISO Code | Region       | Area | Income Group        |
|----------|--------------|------|---------------------|
| KAZ      | Central Asia | Asia | Upper middle income |

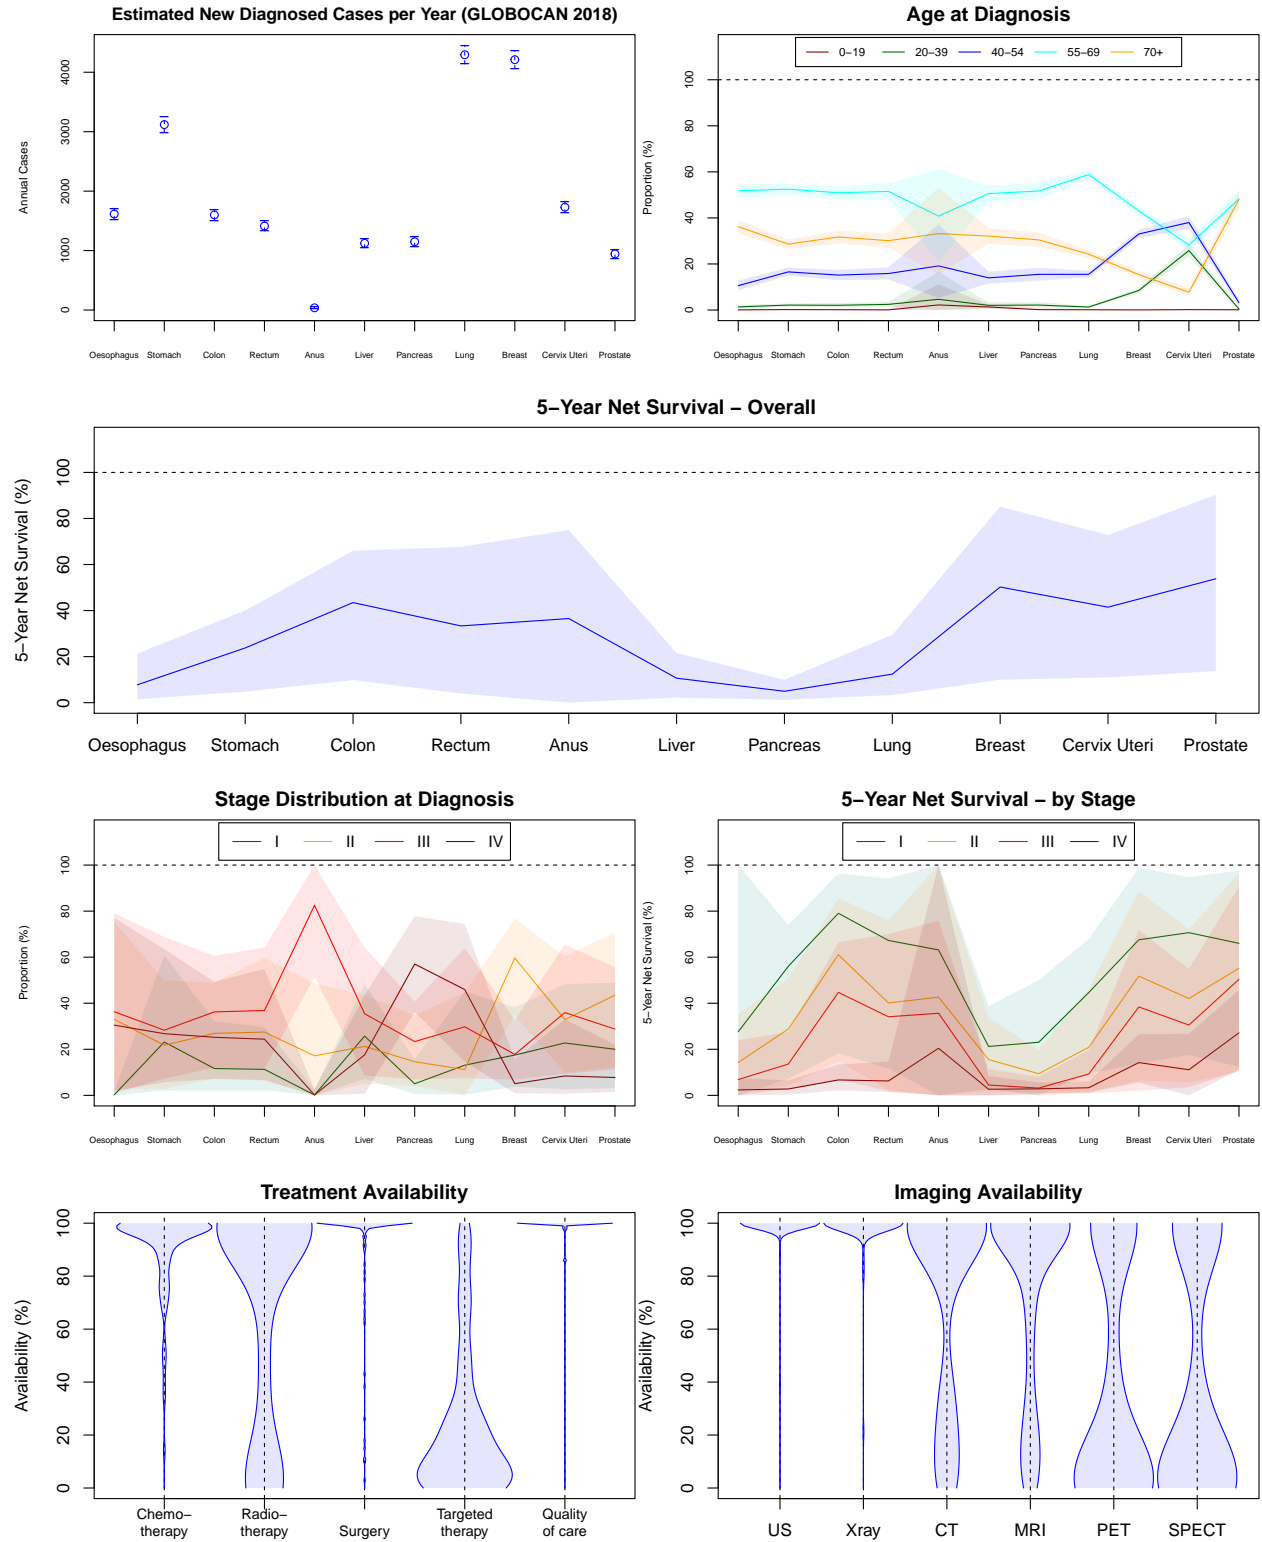

# Kenya

| ISO Code | Region         | Area   | Income Group        |
|----------|----------------|--------|---------------------|
| KEN      | Eastern Africa | Africa | Lower middle income |

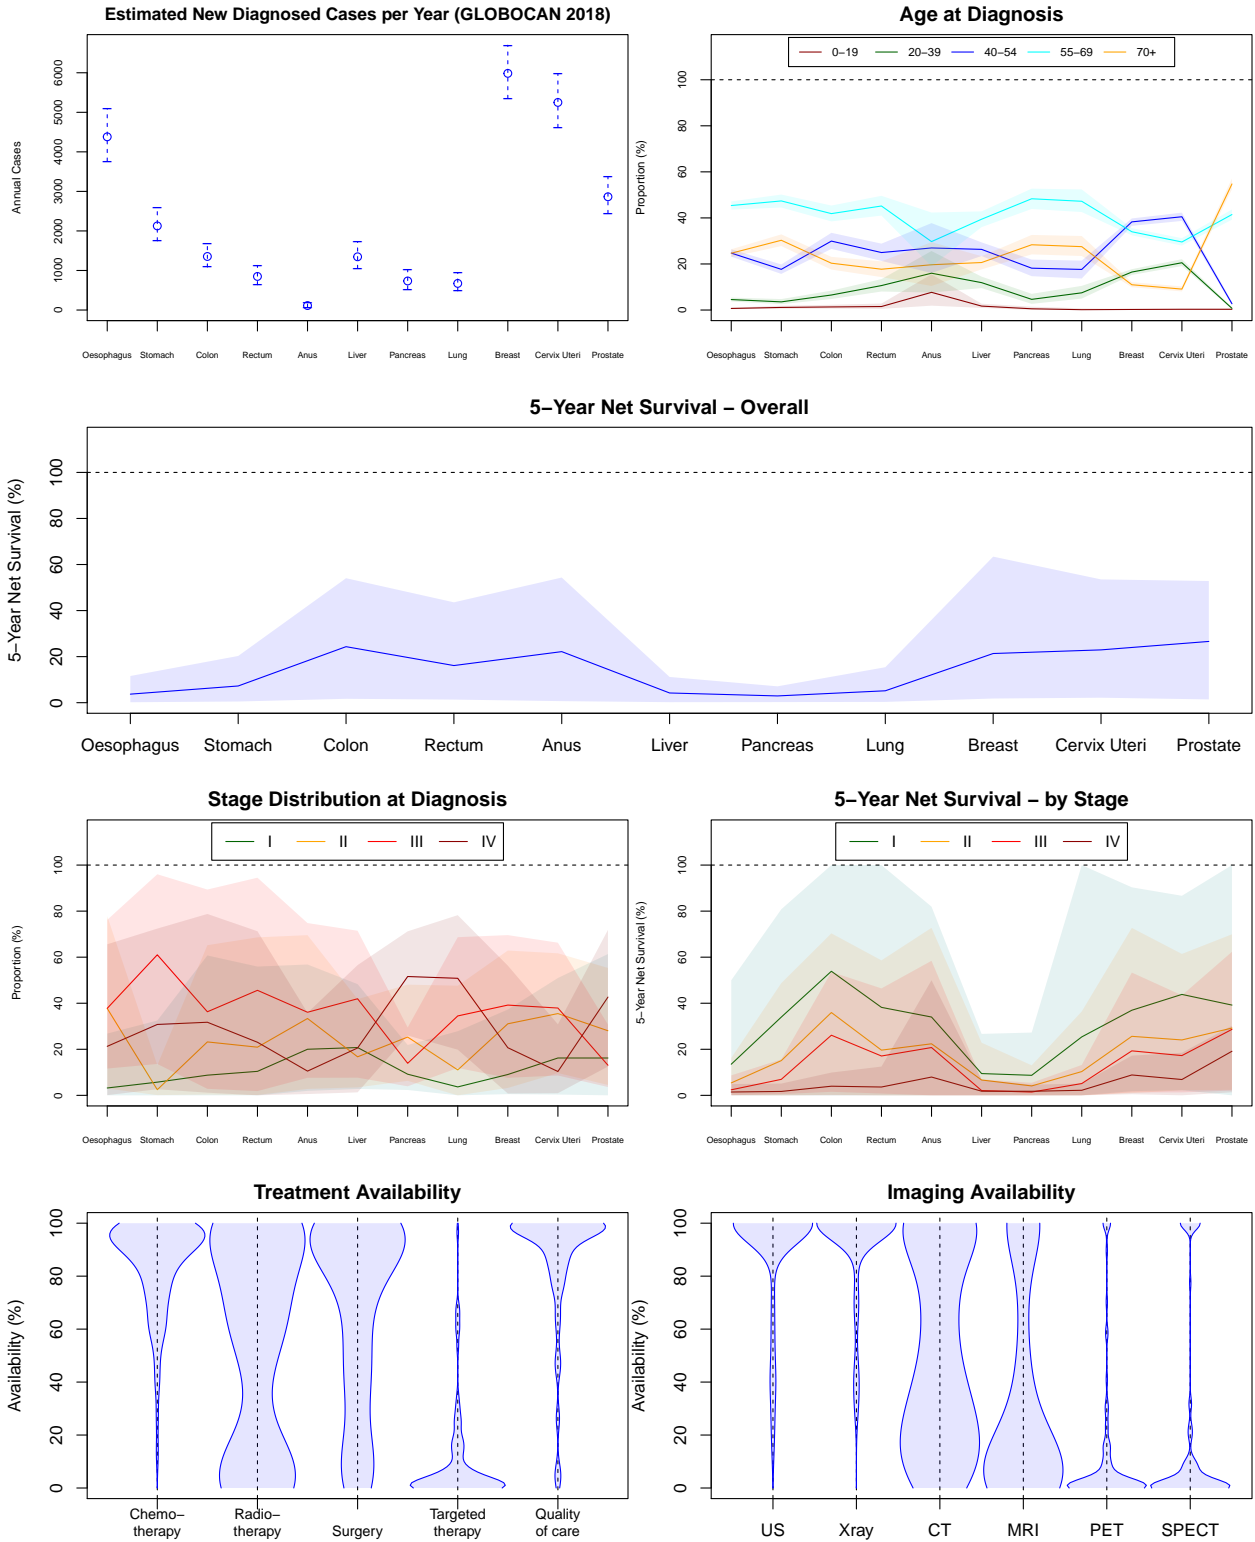

# Kiribati

| ISO Code | Region     | Area    | Income Group        |
|----------|------------|---------|---------------------|
| KIR      | Micronesia | Oceania | Lower middle income |

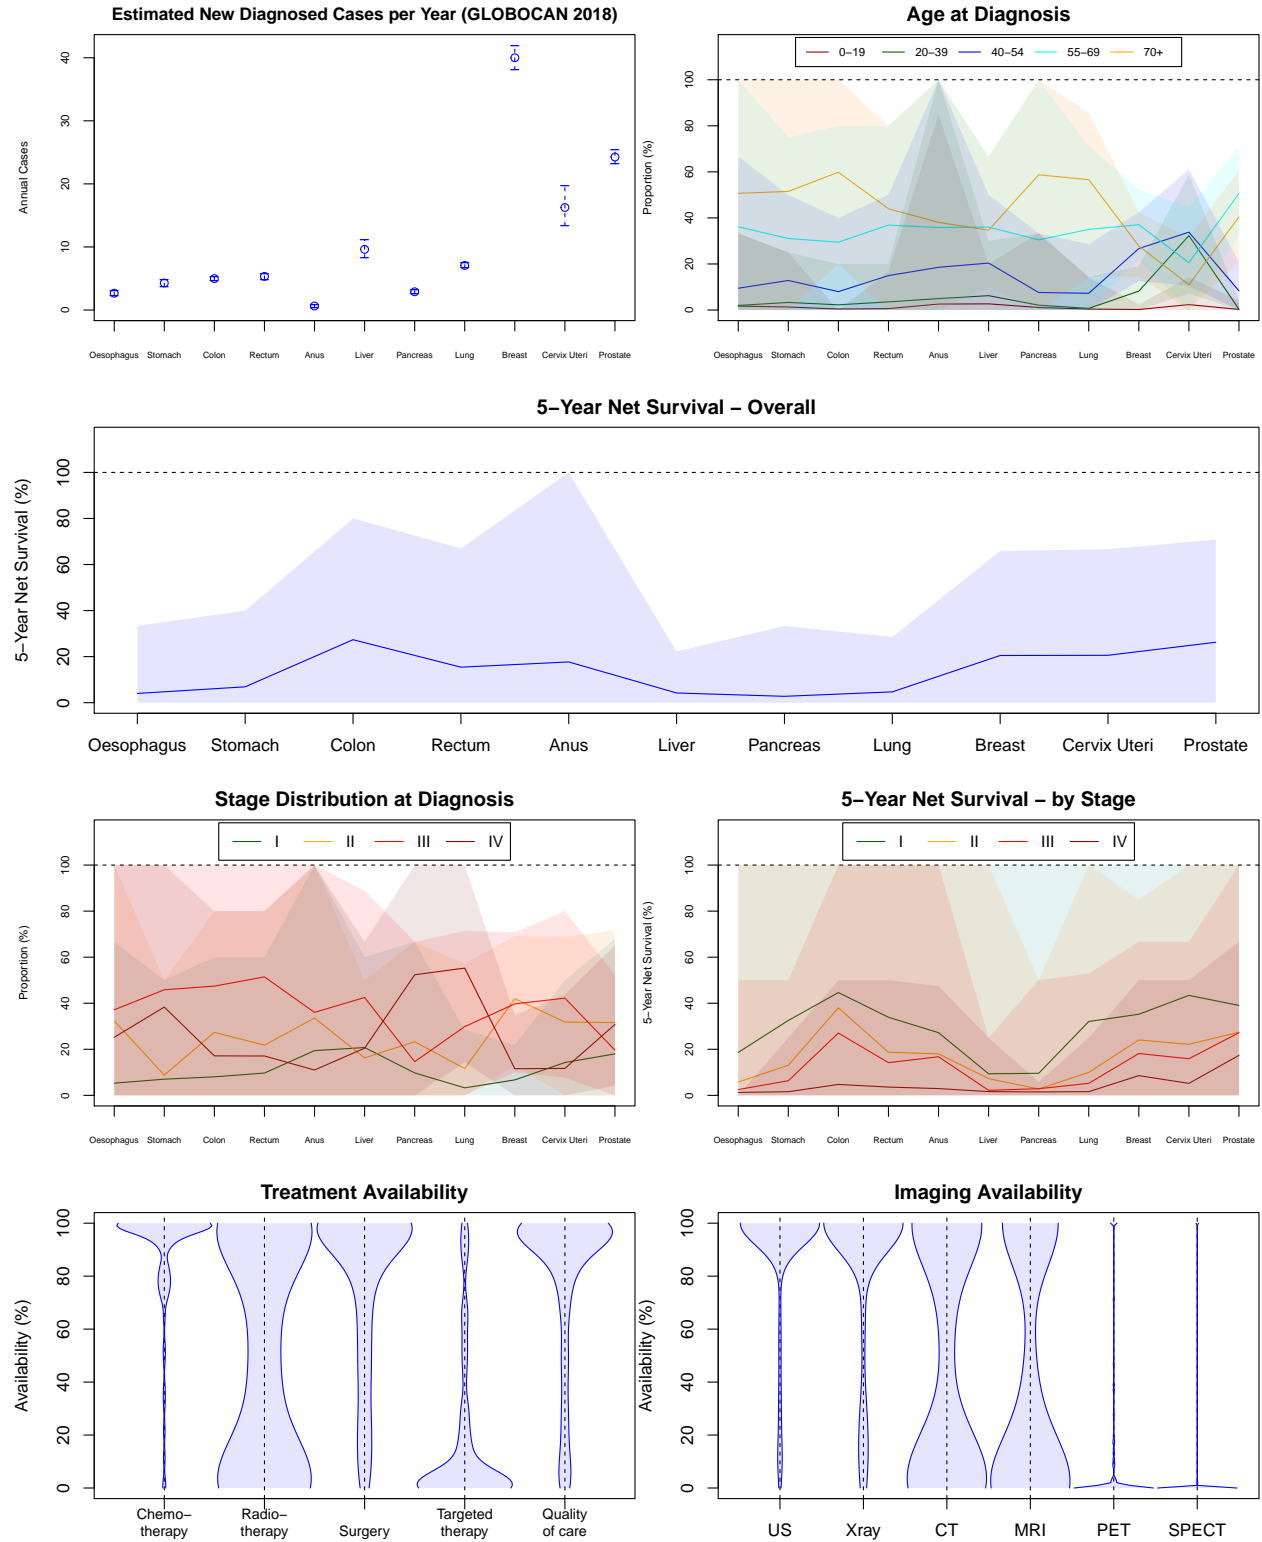

# Kuwait

| ISO Code | Region       | Area | Income Group |
|----------|--------------|------|--------------|
| KWT      | Western Asia | Asia | High income  |

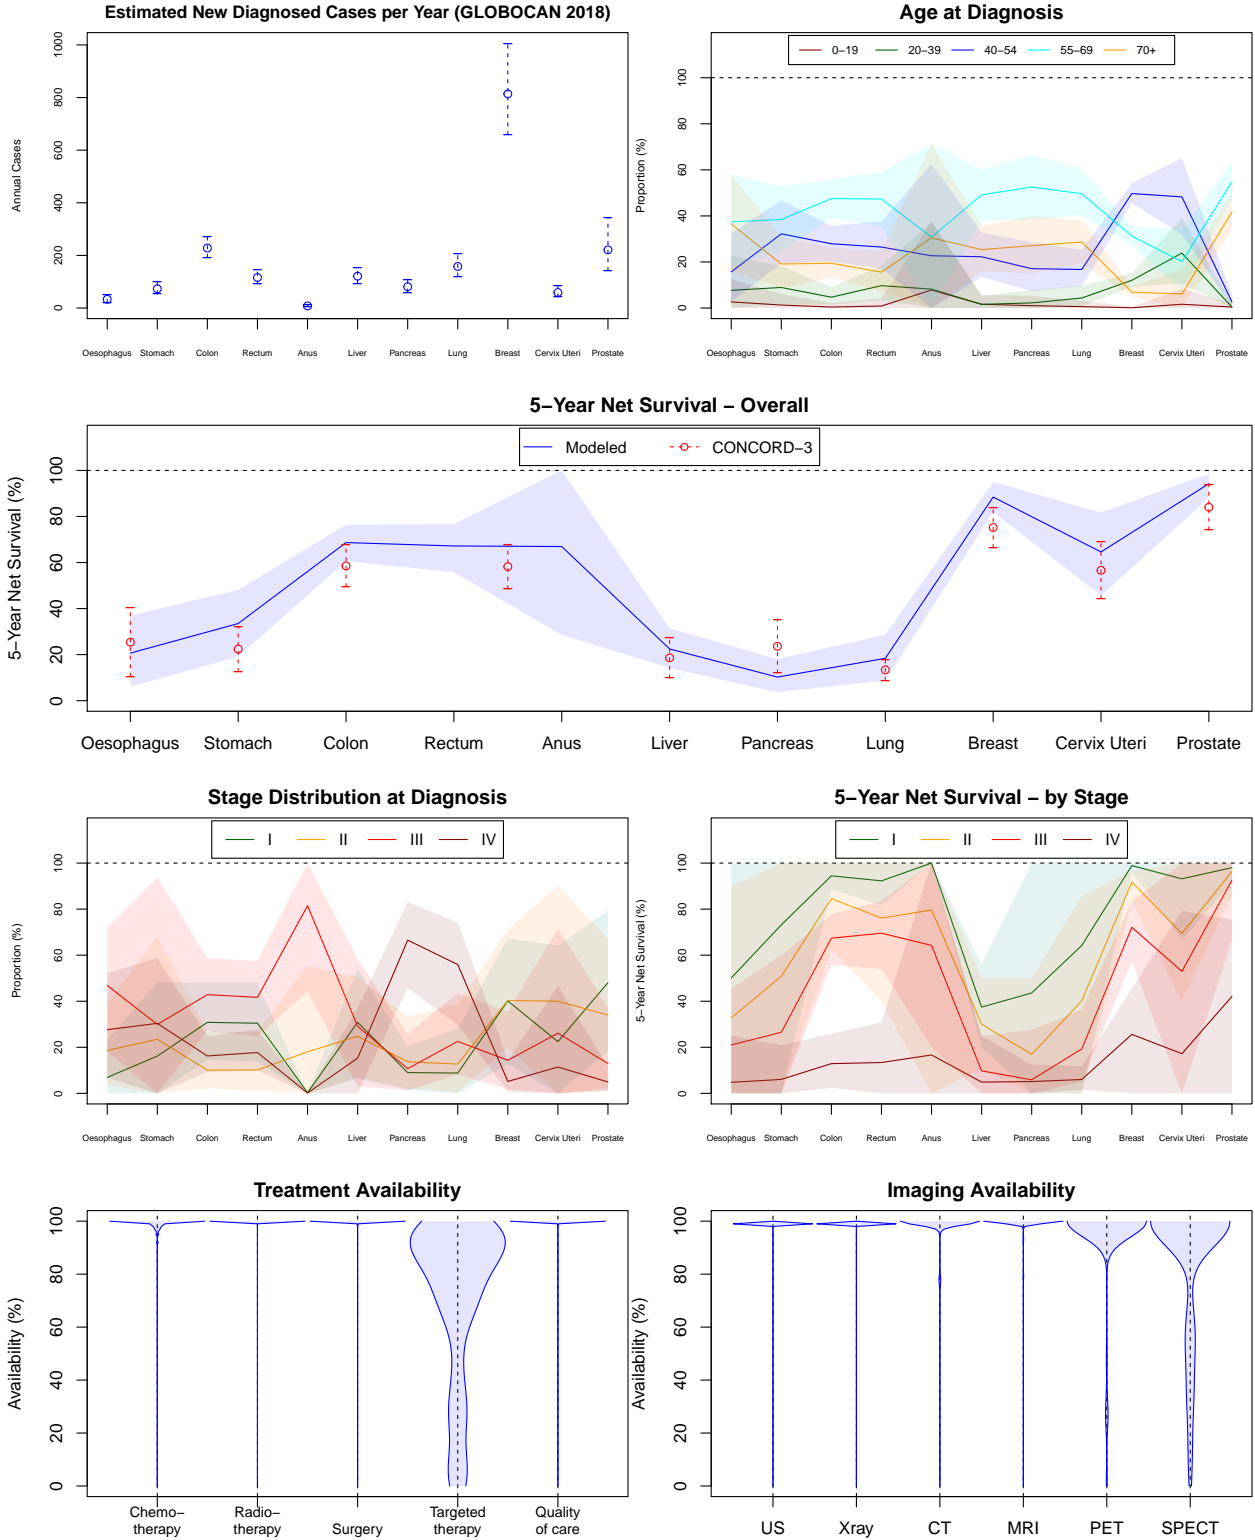

# Kyrgyzstan

| ISO Code | Region       | Area | Income Group        |
|----------|--------------|------|---------------------|
| KGZ      | Central Asia | Asia | Lower middle income |

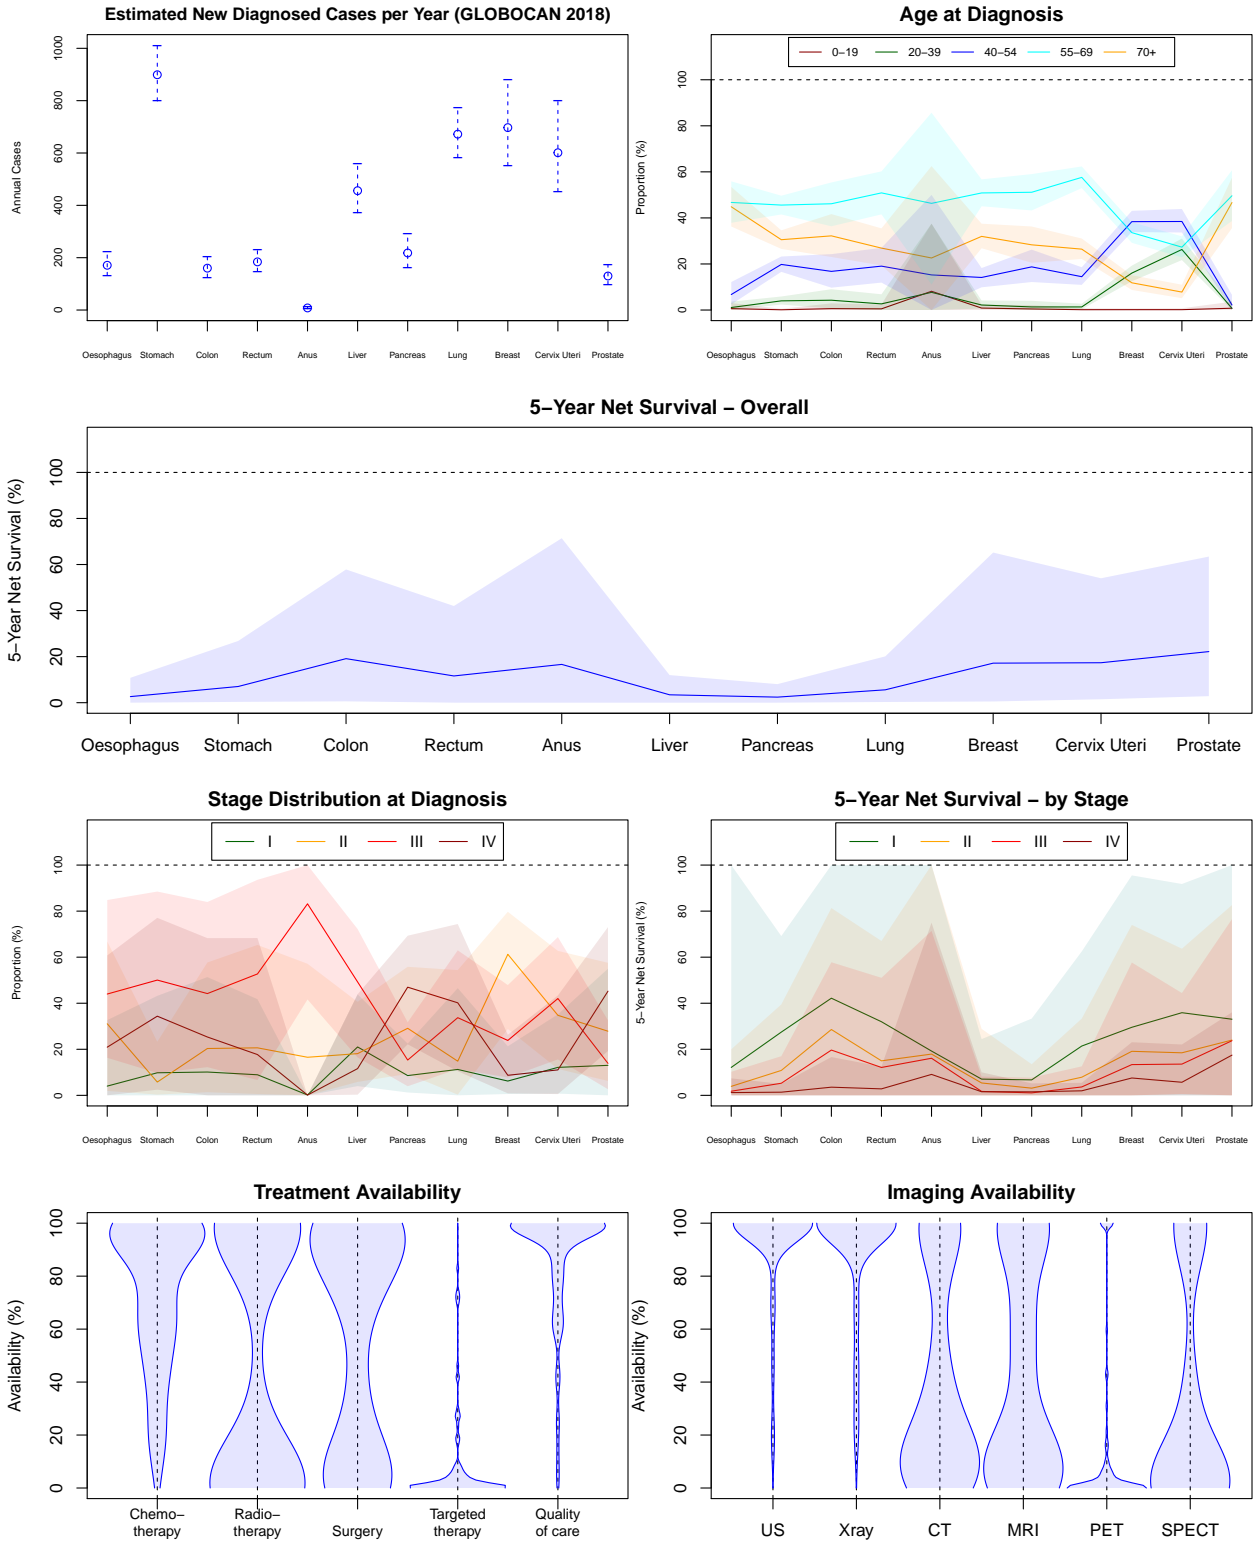

# Lao People's Democratic Republic

| ISO Code | Region             | Area | Income Group        |
|----------|--------------------|------|---------------------|
| LAO      | South-Eastern Asia | Asia | Lower middle income |

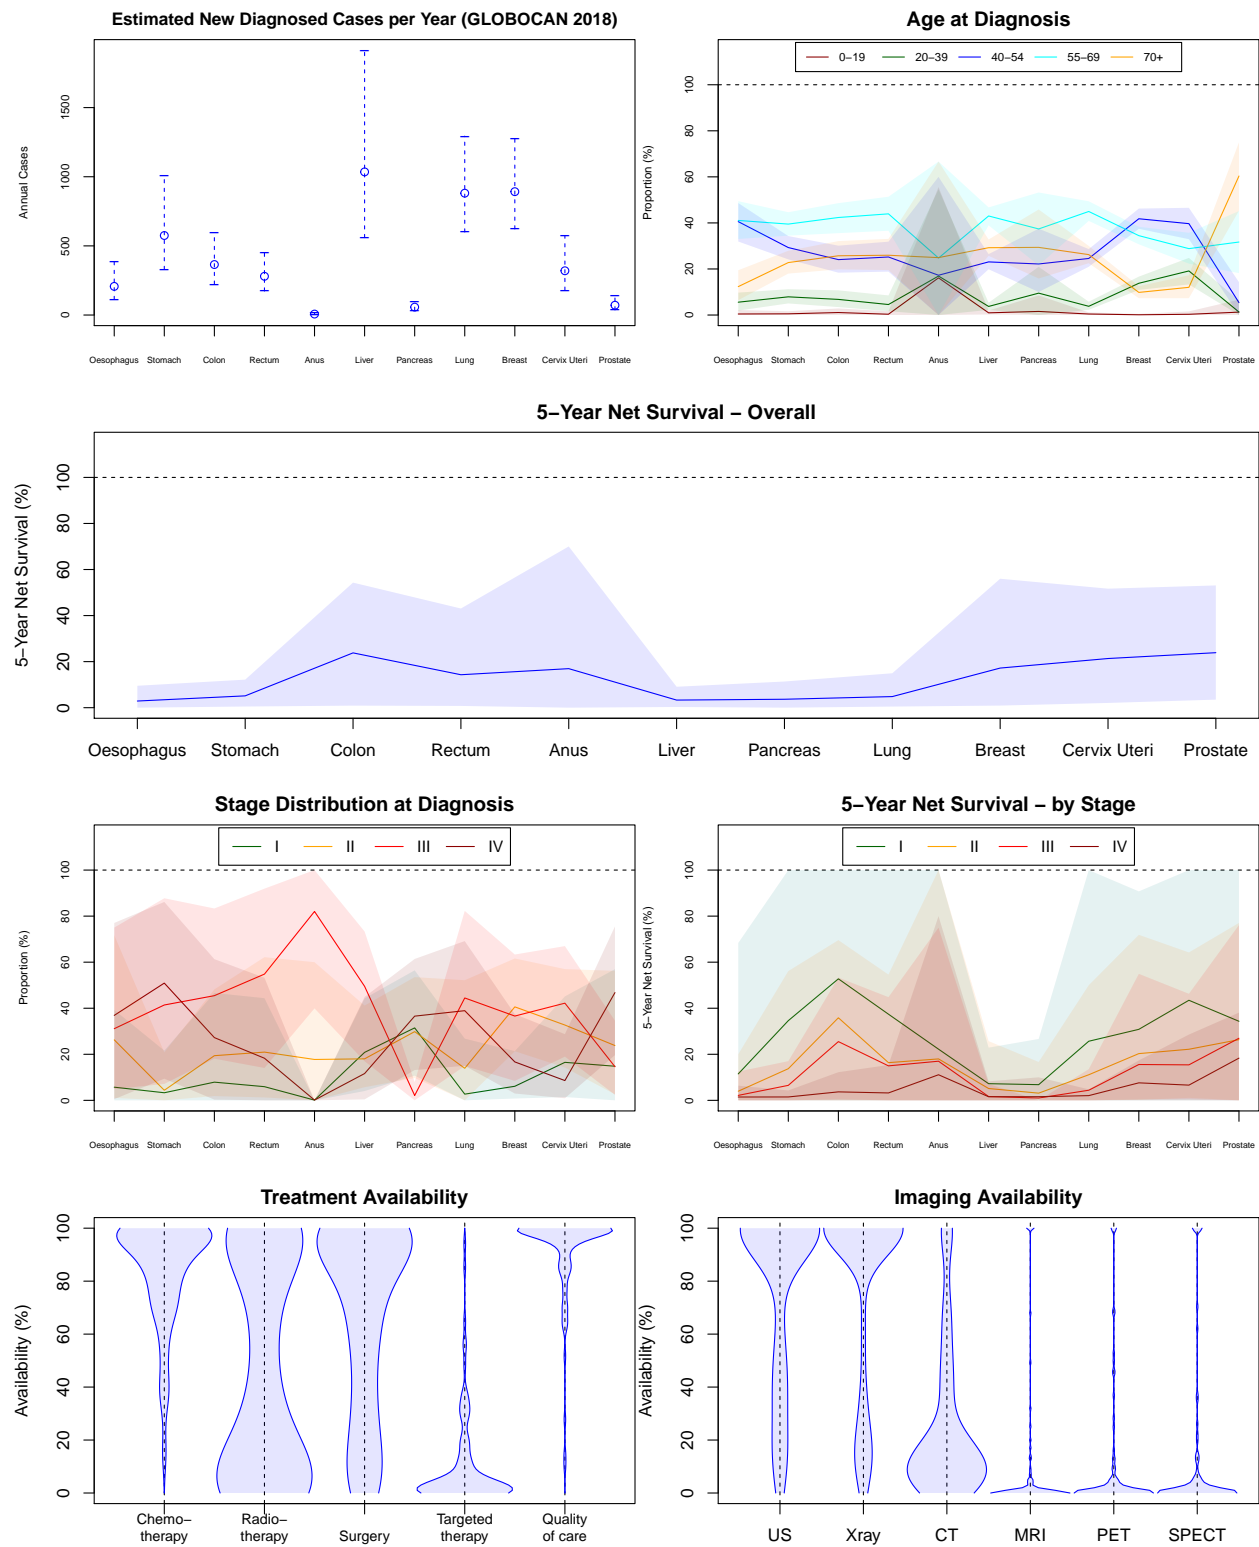

# Latvia

| ISO Code | Region          | Area   | Income Group |
|----------|-----------------|--------|--------------|
| LVA      | Northern Europe | Europe | High income  |

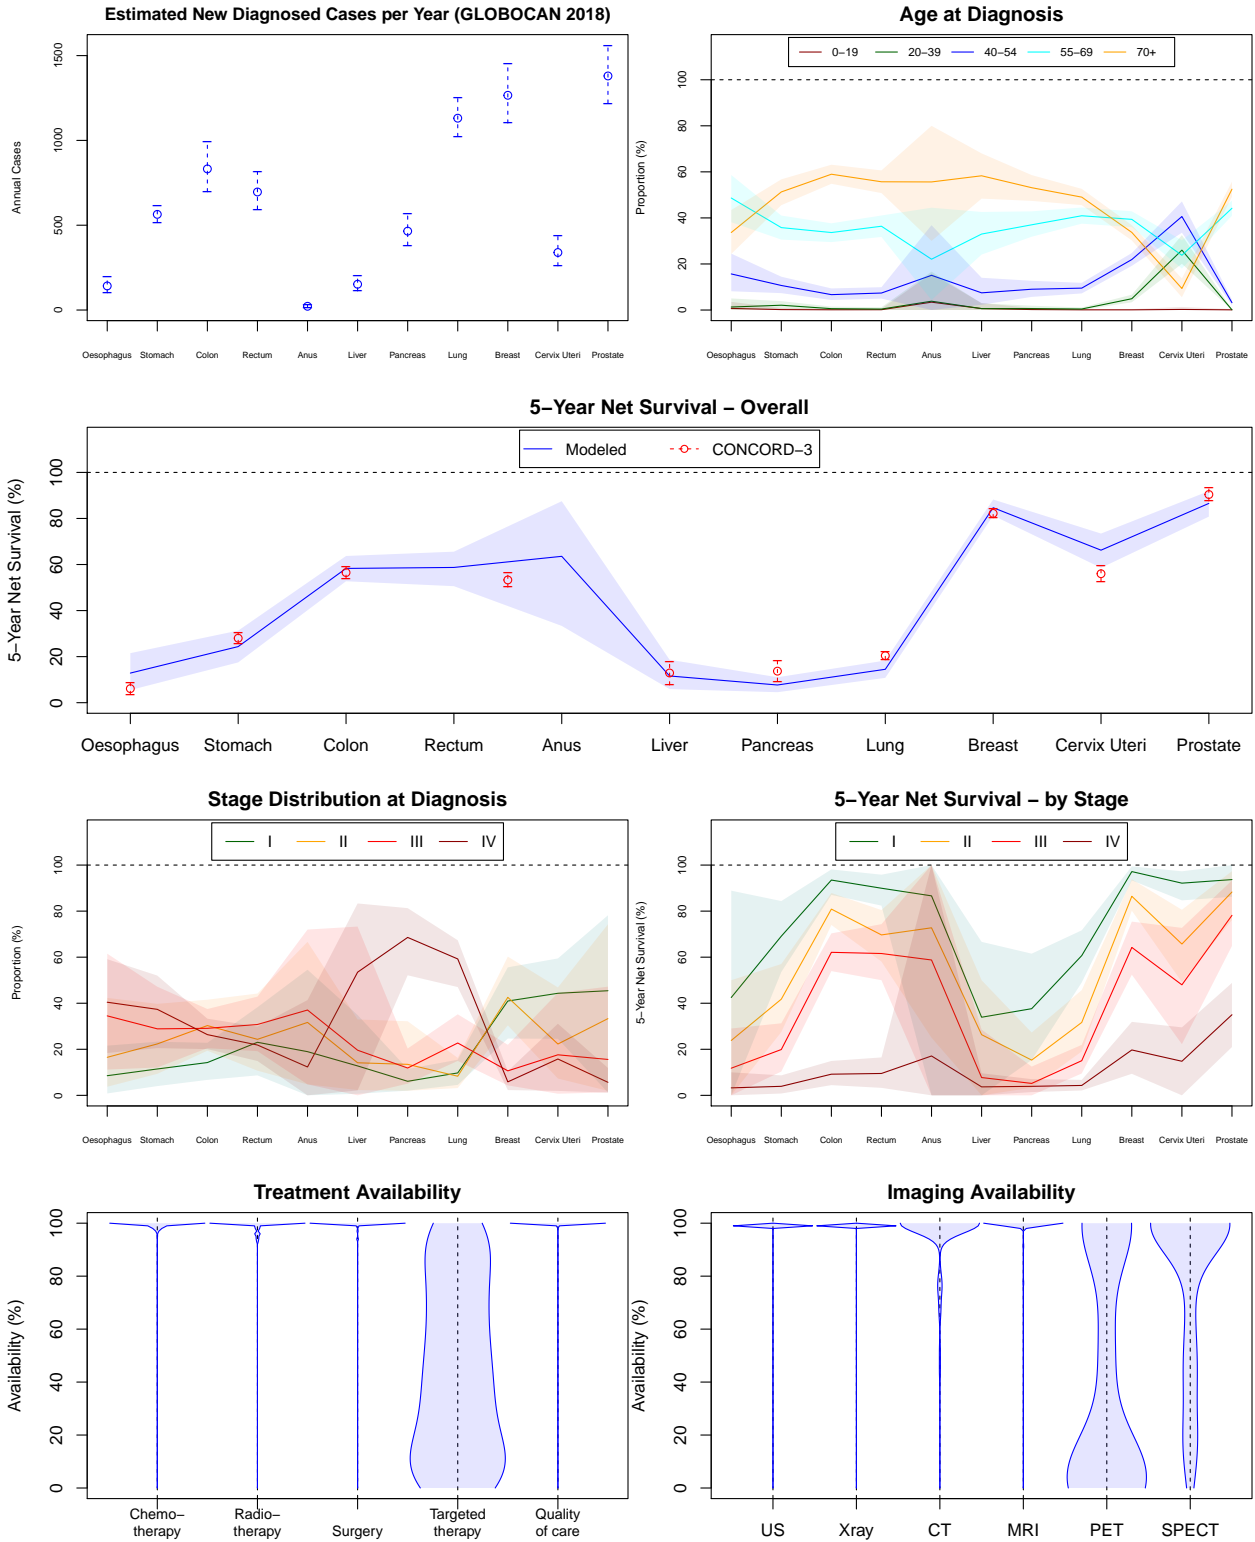



# Lebanon

| ISO Code | Region       | Area | Income Group        |
|----------|--------------|------|---------------------|
| LBN      | Western Asia | Asia | Upper middle income |

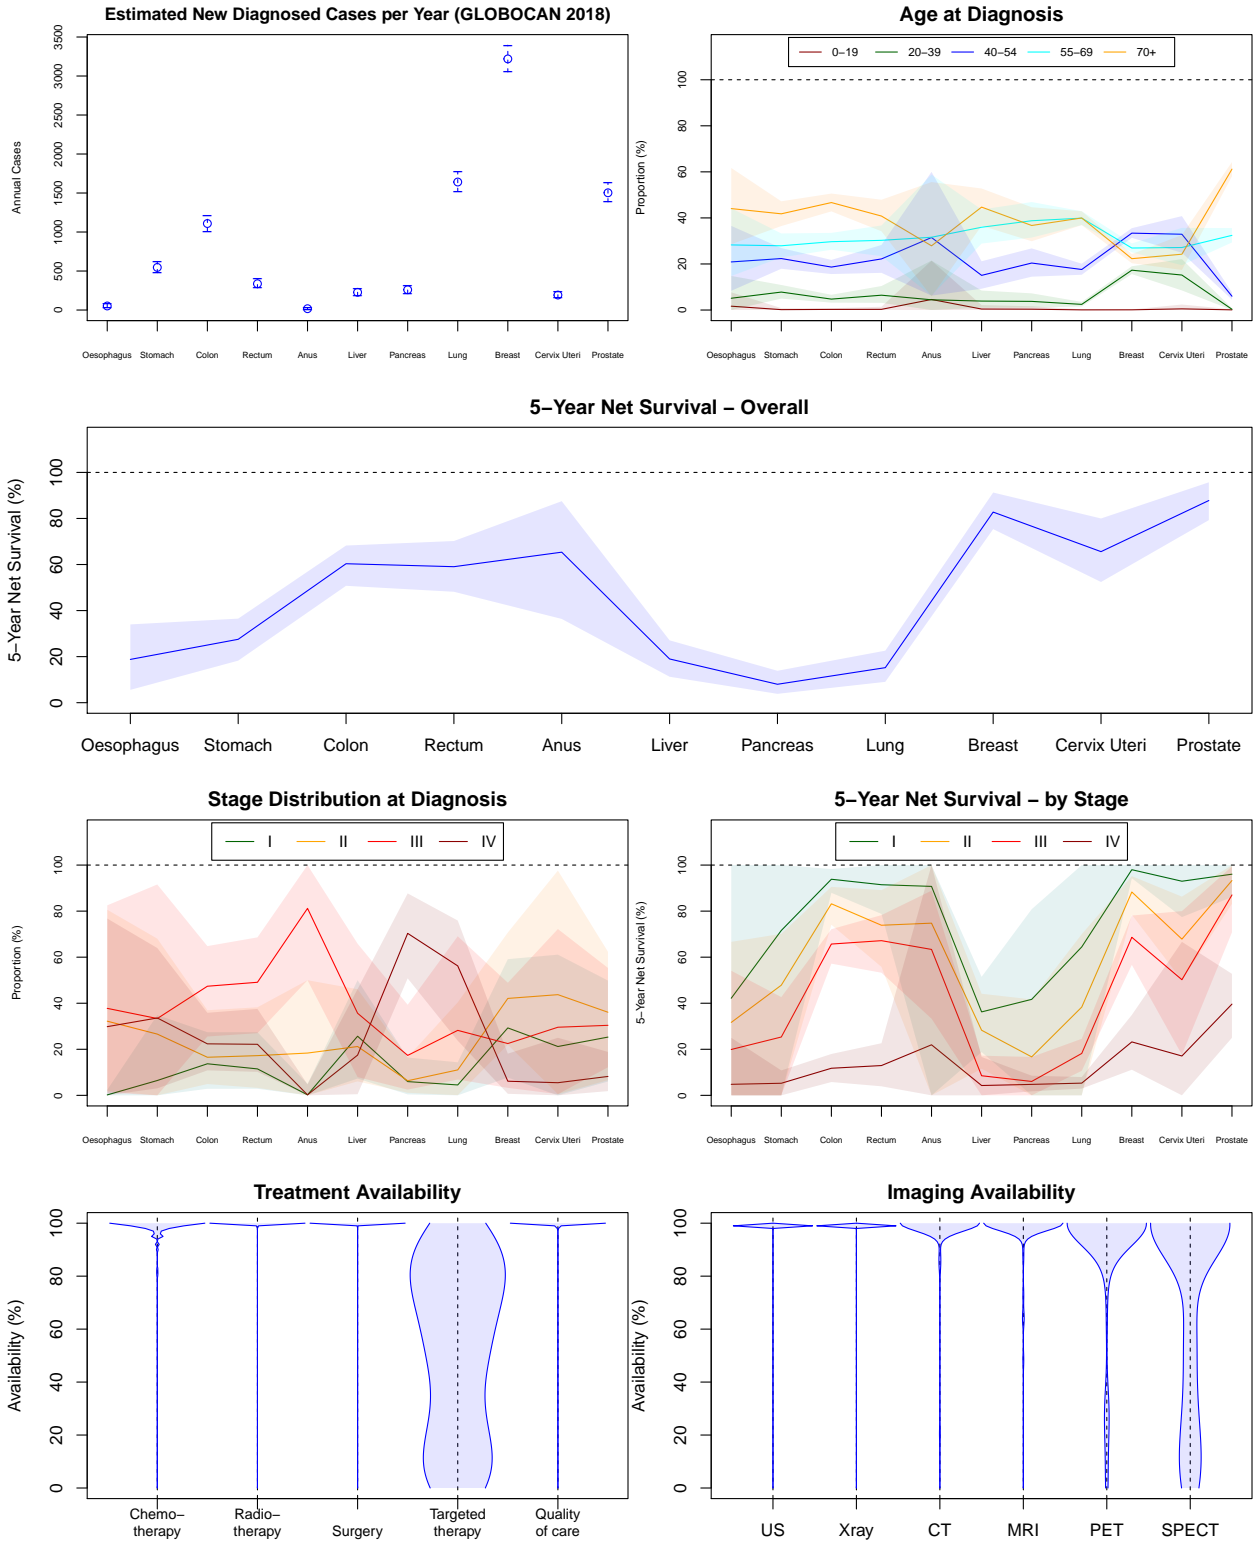

# Lesotho

| ISO Code | Region          | Area   | Income Group        |
|----------|-----------------|--------|---------------------|
| LSO      | Southern Africa | Africa | Lower middle income |

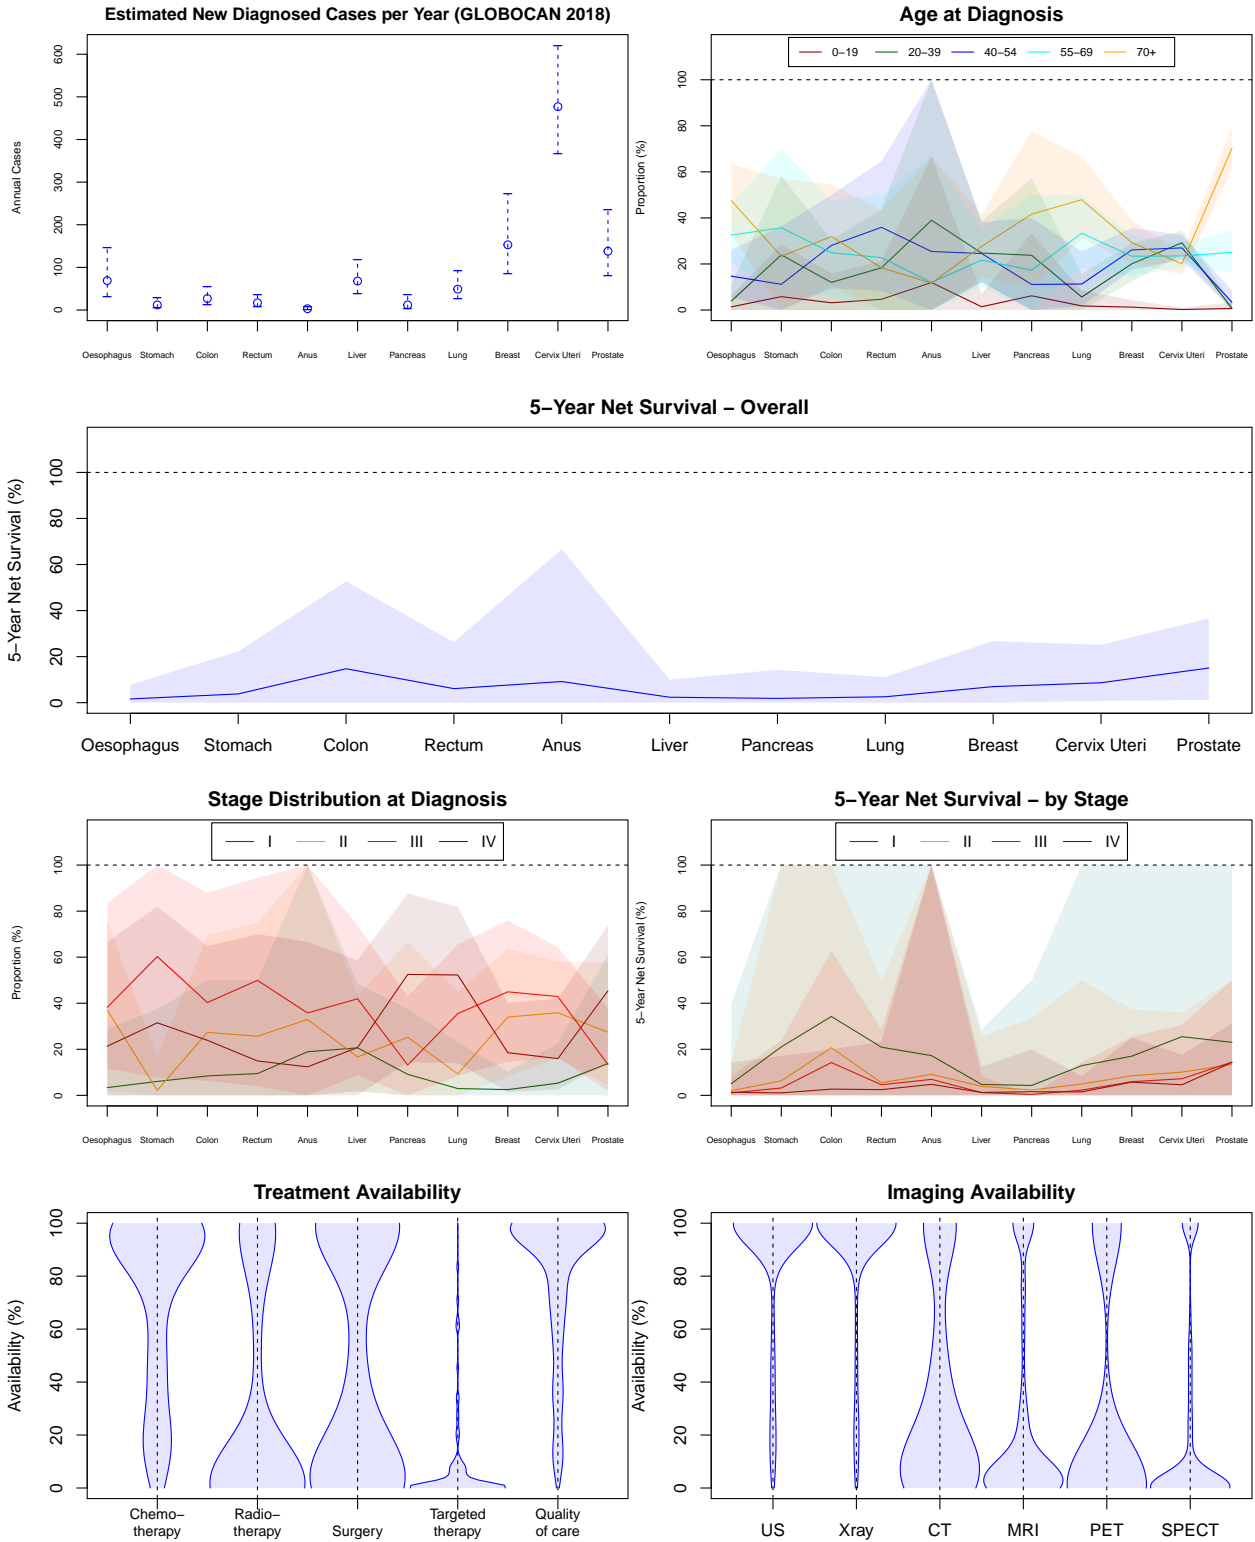

# Liberia

| ISO Code | Region         | Area   | Income Group |
|----------|----------------|--------|--------------|
| LBR      | Western Africa | Africa | Low income   |

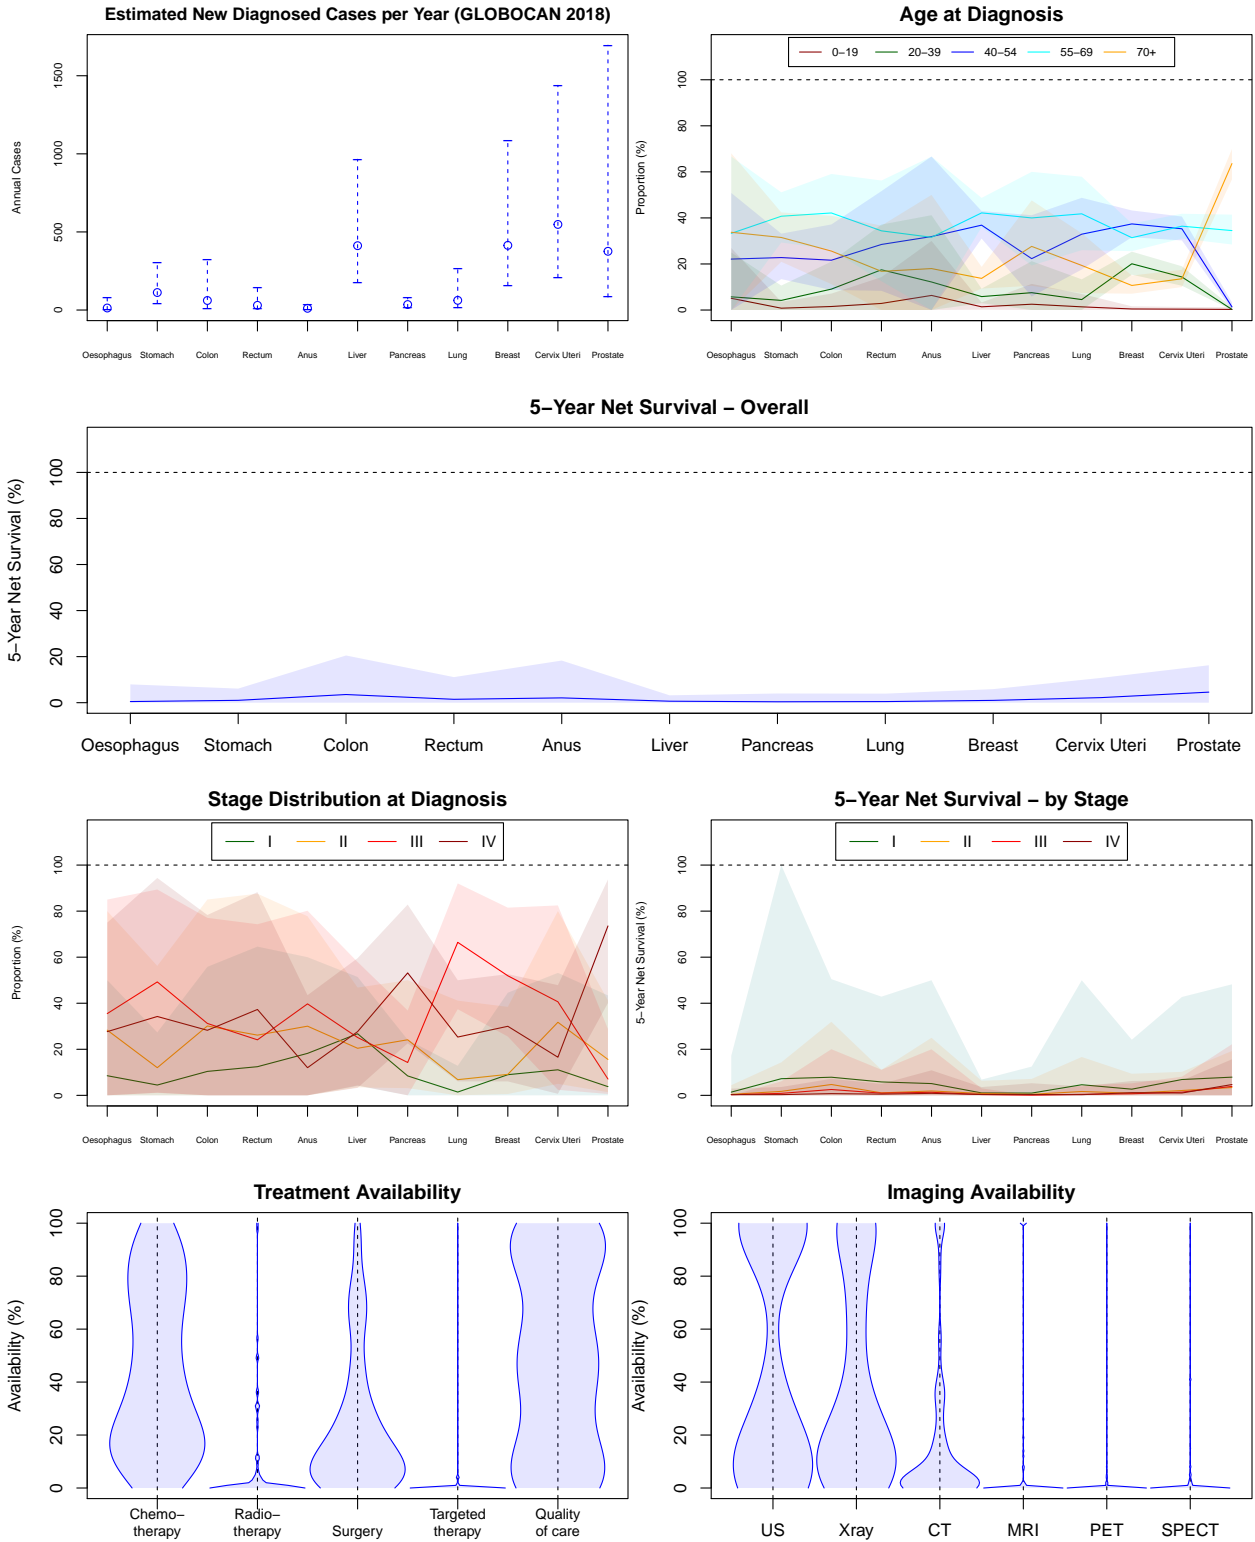

# Libya

| ISO Code | Region          | Area   | Income Group        |
|----------|-----------------|--------|---------------------|
| LBY      | Northern Africa | Africa | Upper middle income |

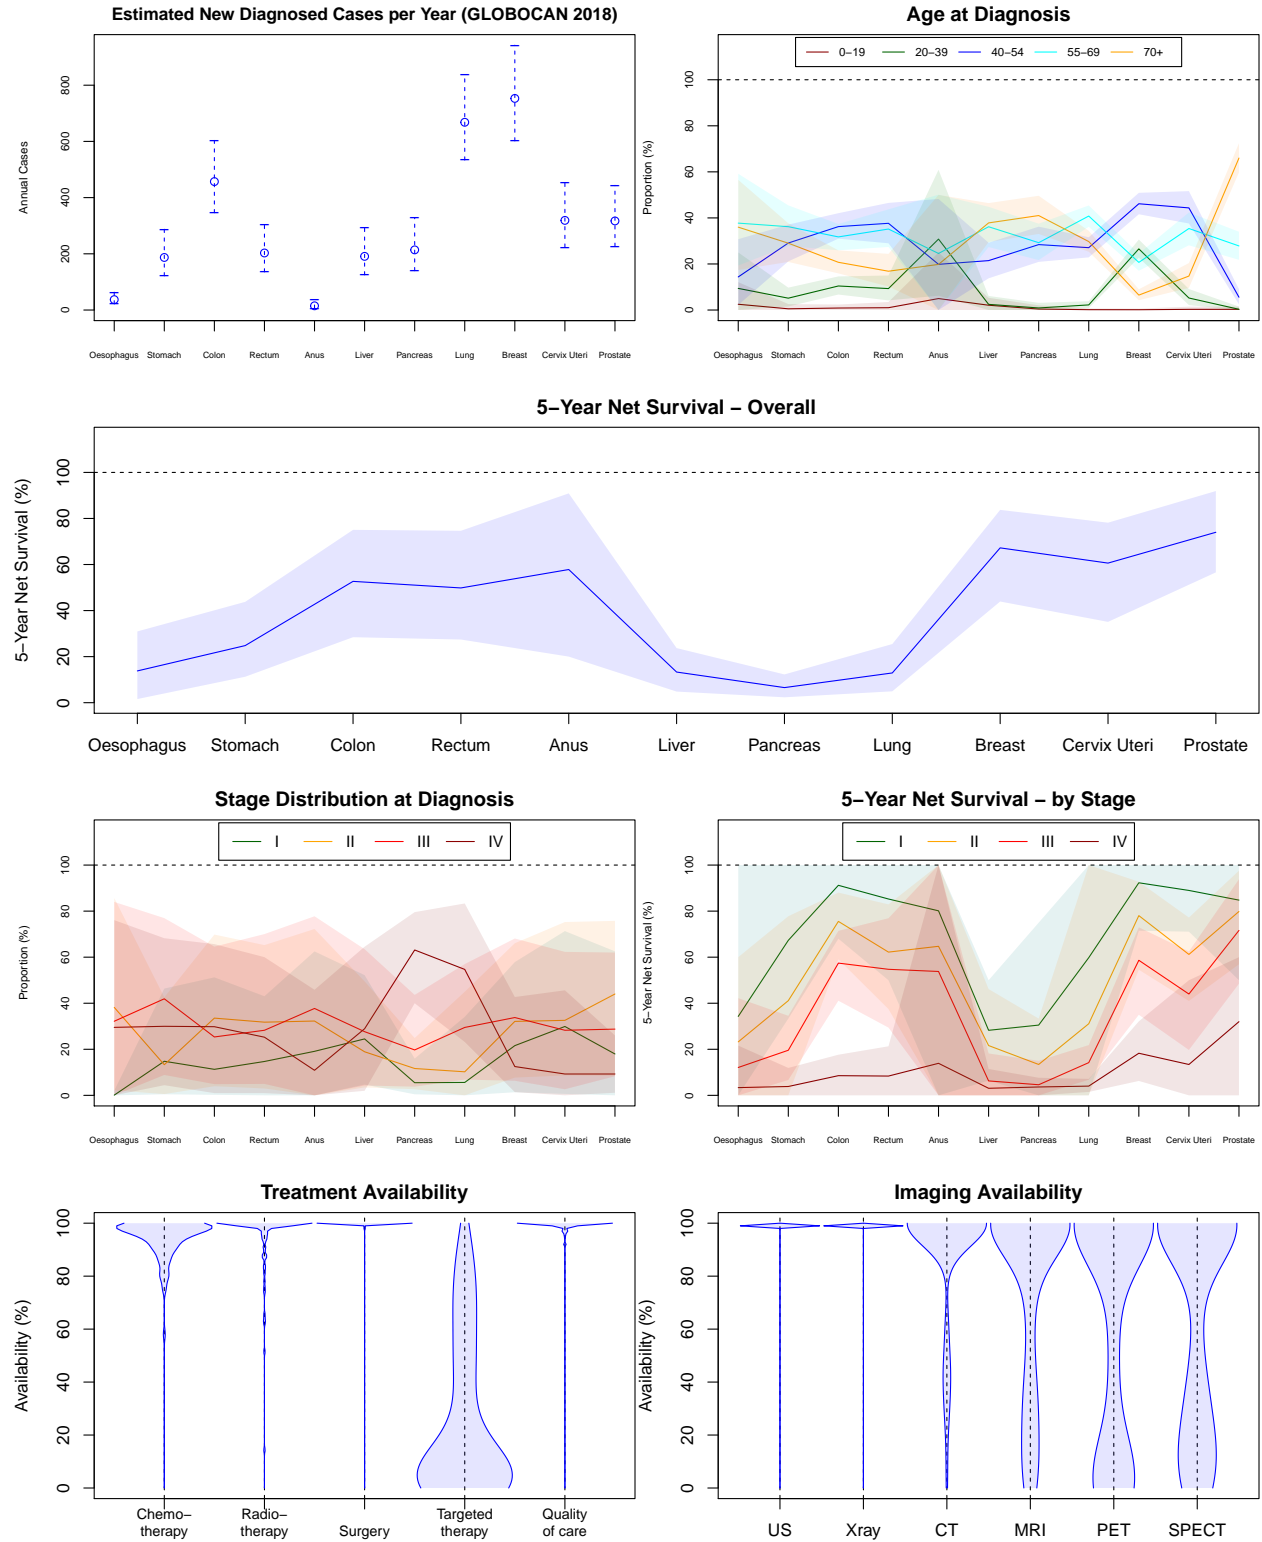

# Liechtenstein

| ISO Code | Region         | Area   | Income Group |
|----------|----------------|--------|--------------|
| LIE      | Western Europe | Europe | High income  |

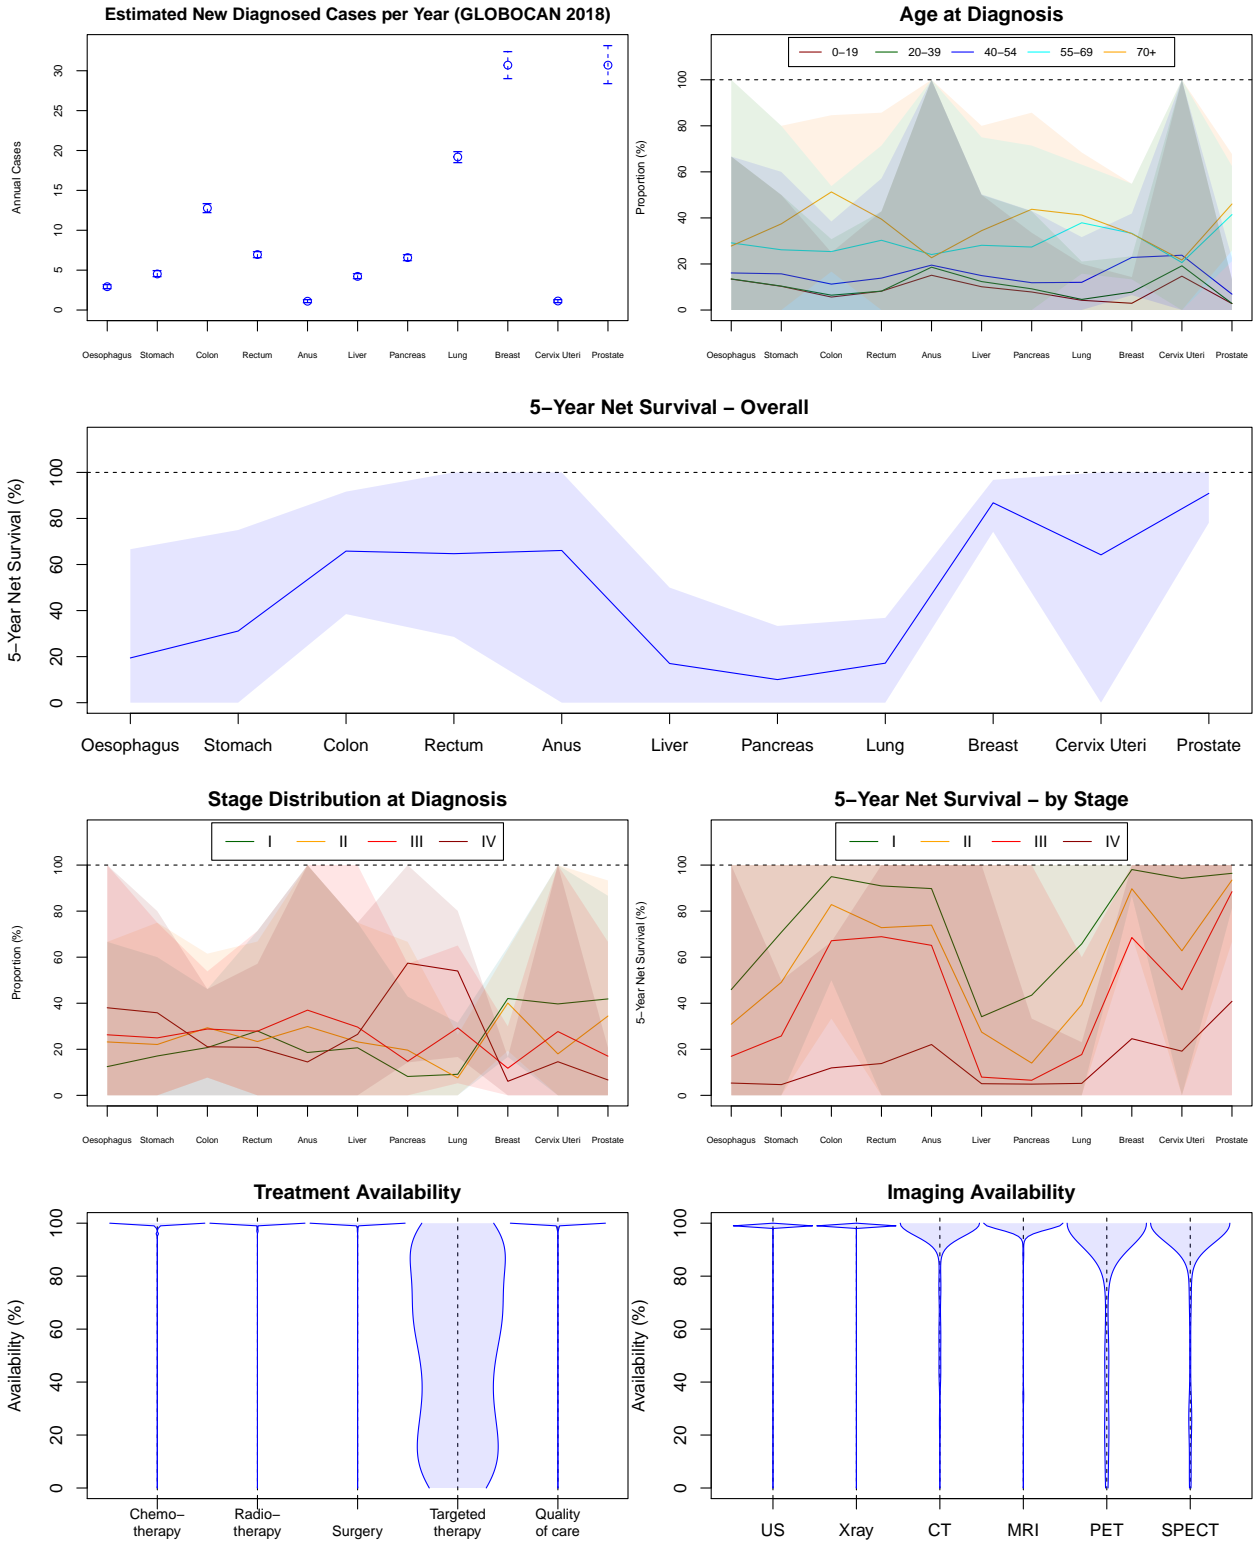

# Lithuania

| ISO Code | Region          | Area   | Income Group |
|----------|-----------------|--------|--------------|
| LTU      | Northern Europe | Europe | High income  |

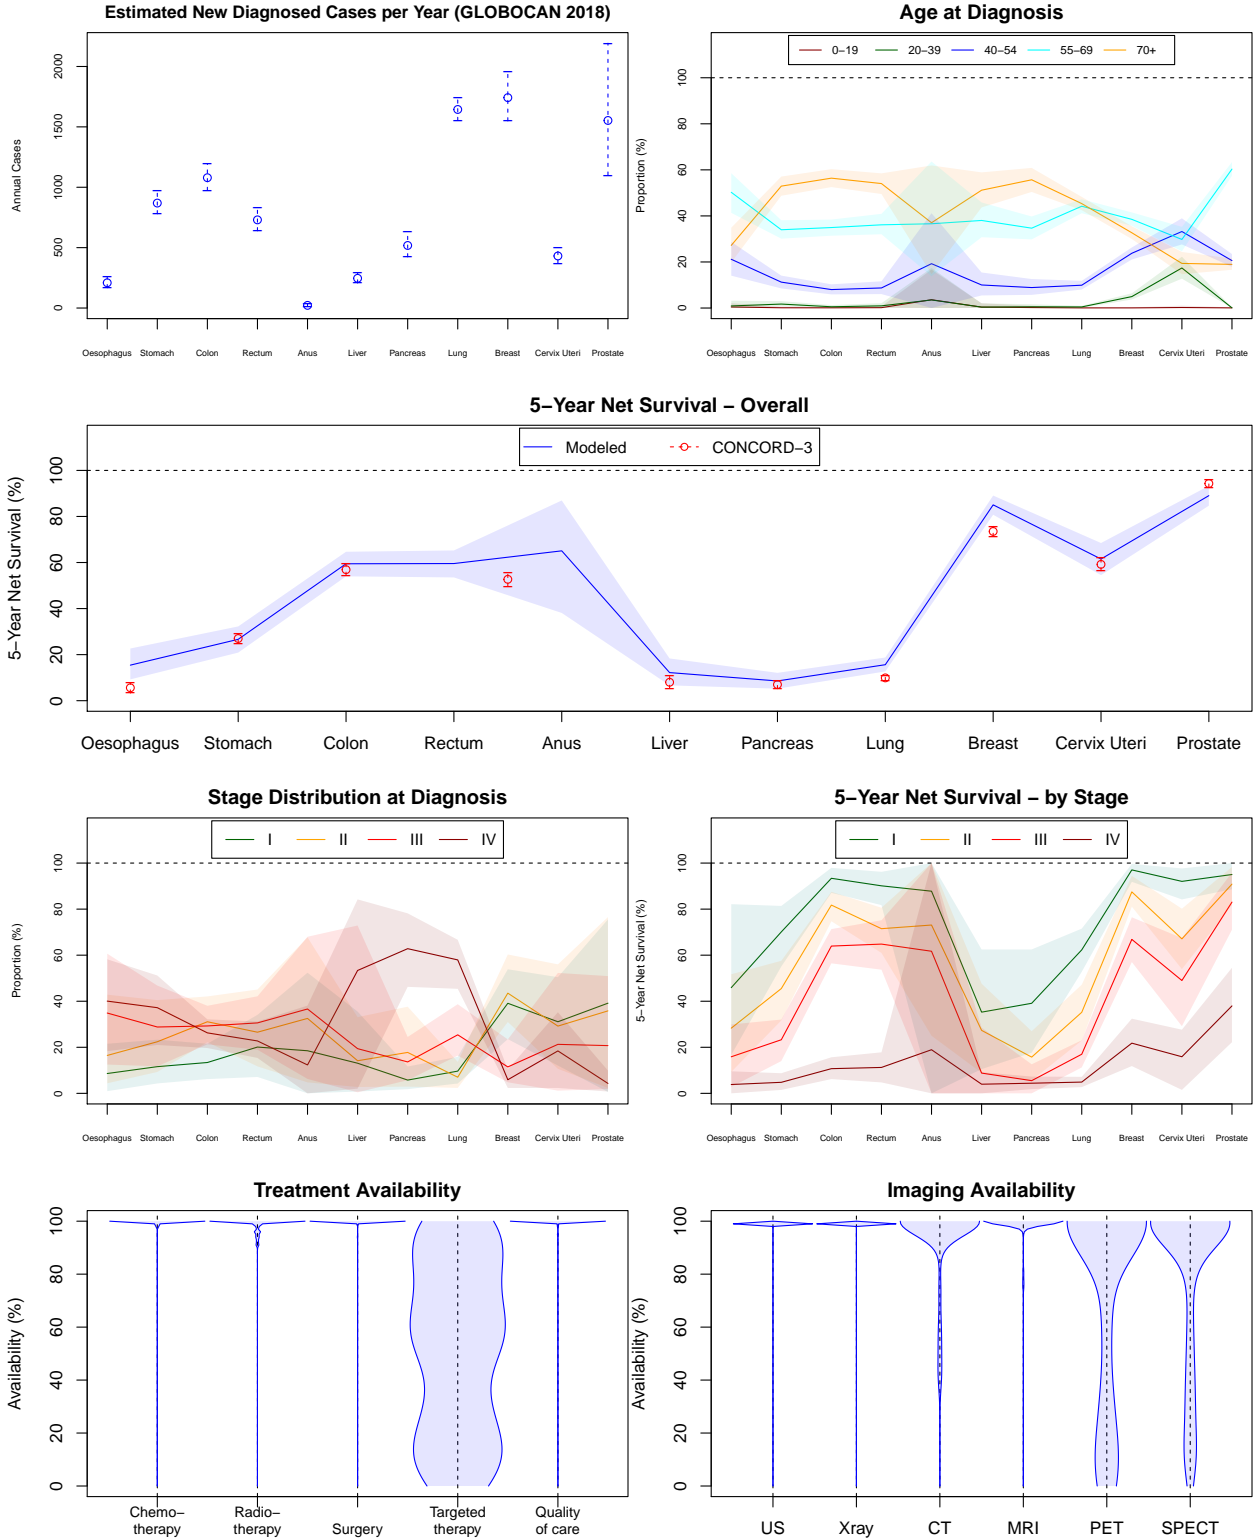

# Luxembourg

| ISO Code | Region         | Area   | Income Group |
|----------|----------------|--------|--------------|
| LUX      | Western Europe | Europe | High income  |

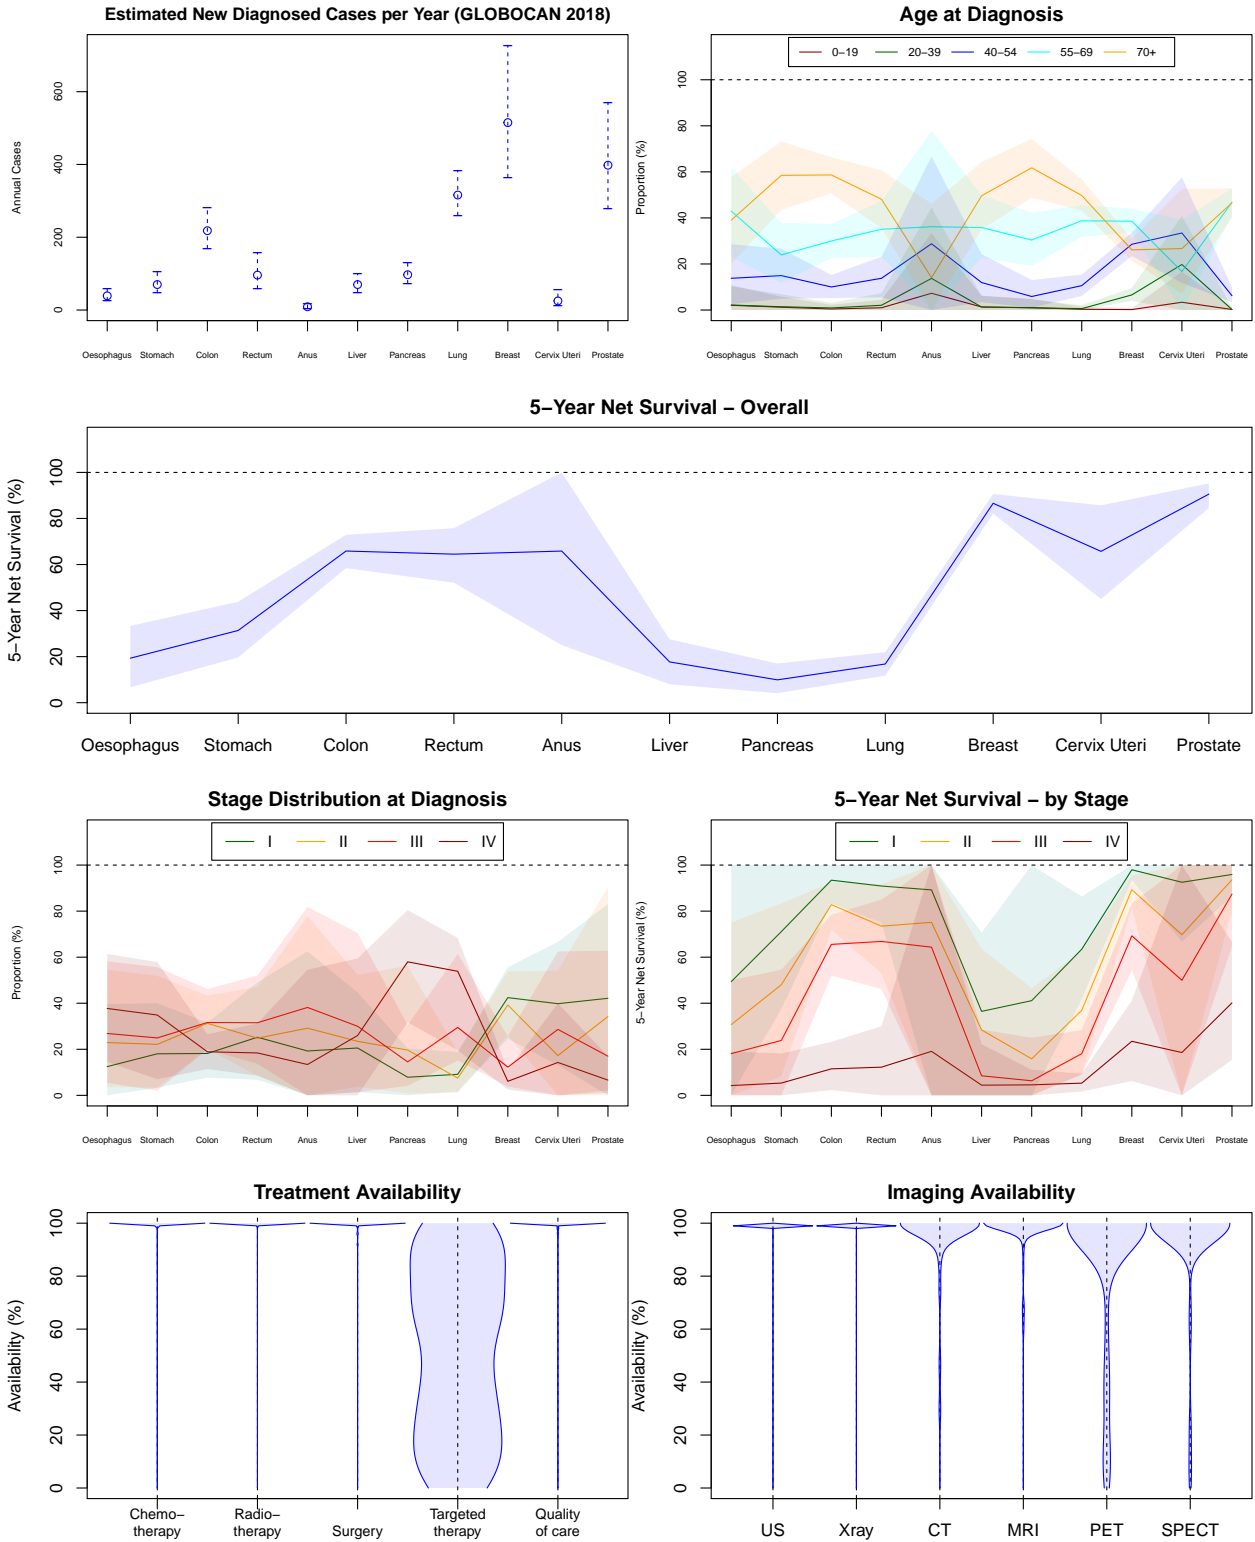

# Madagascar

| ISO Code | Region         | Area   | Income Group |
|----------|----------------|--------|--------------|
| MDG      | Eastern Africa | Africa | Low income   |

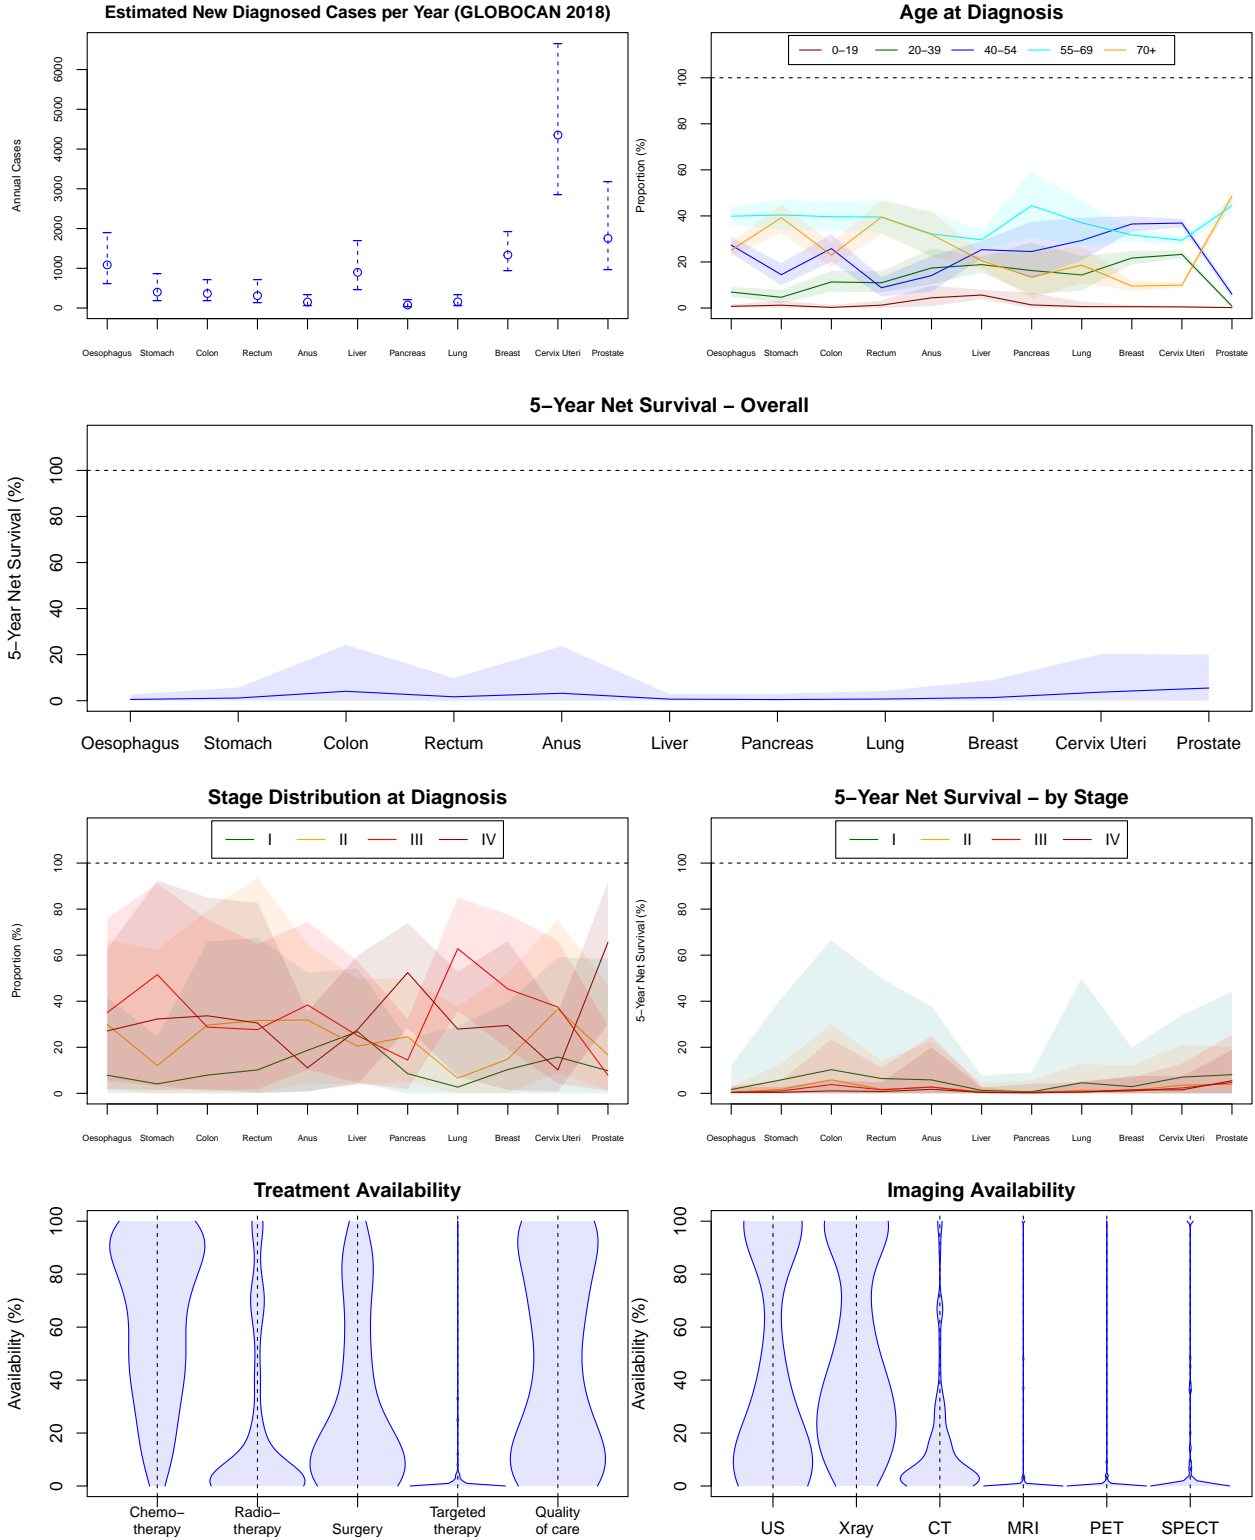



# Malawi

| ISO Code | Region         | Area   | Income Group |
|----------|----------------|--------|--------------|
| MWI      | Eastern Africa | Africa | Low income   |

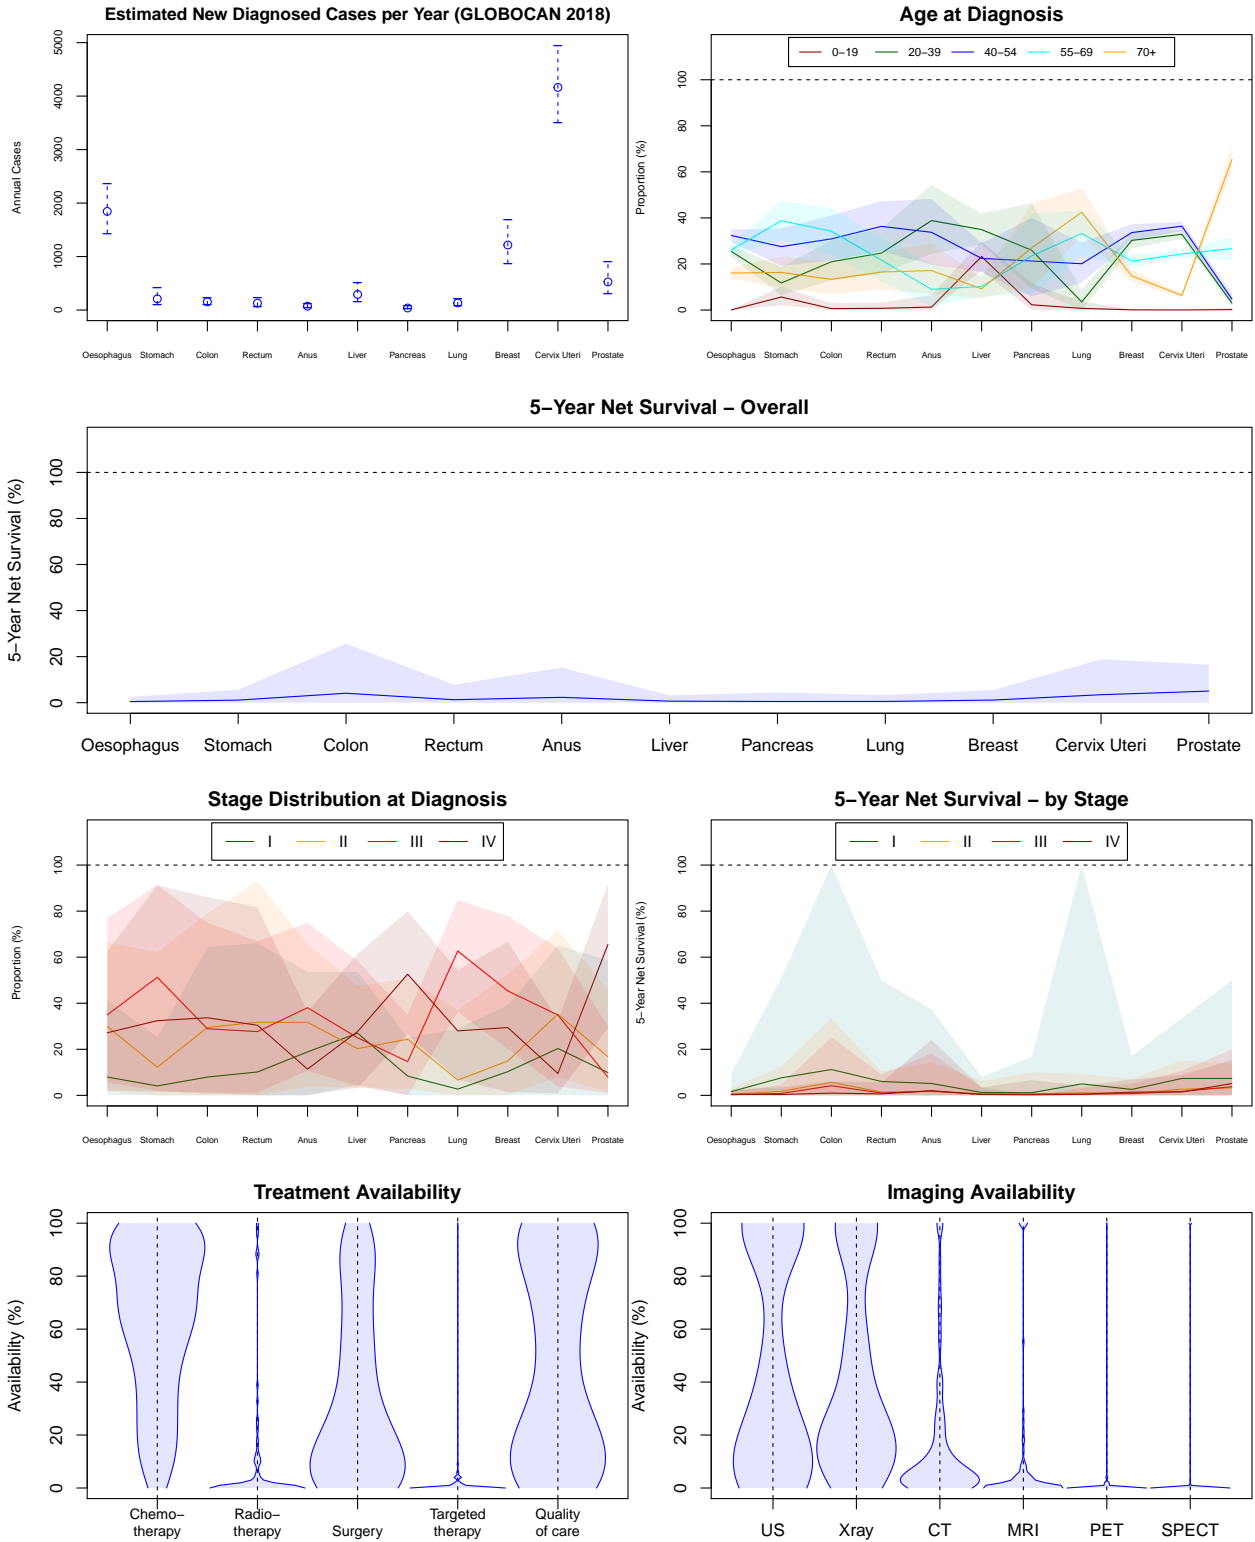

# Malaysia

| ISO Code | Region             | Area | Income Group        |
|----------|--------------------|------|---------------------|
| MYS      | South-Eastern Asia | Asia | Upper middle income |

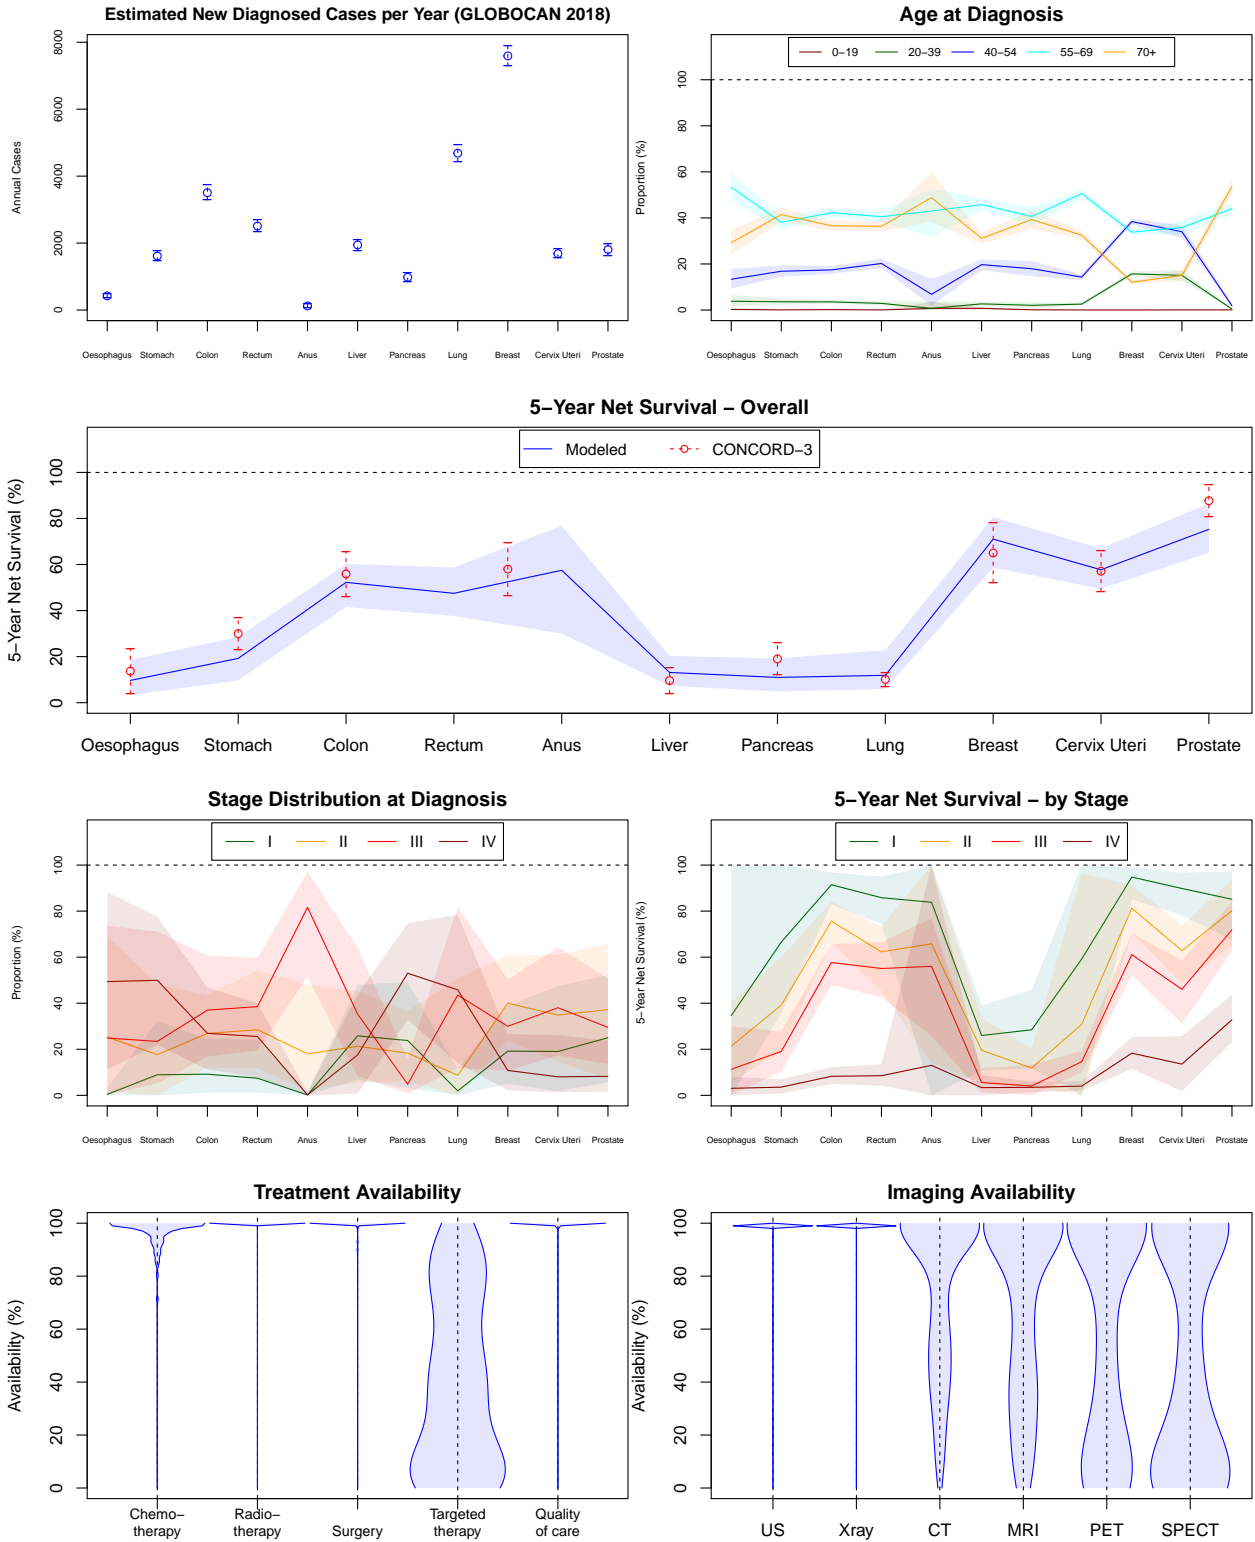

# Maldives

| ISO Code | Region        | Area | Income Group        |
|----------|---------------|------|---------------------|
| MDV      | Southern Asia | Asia | Upper middle income |

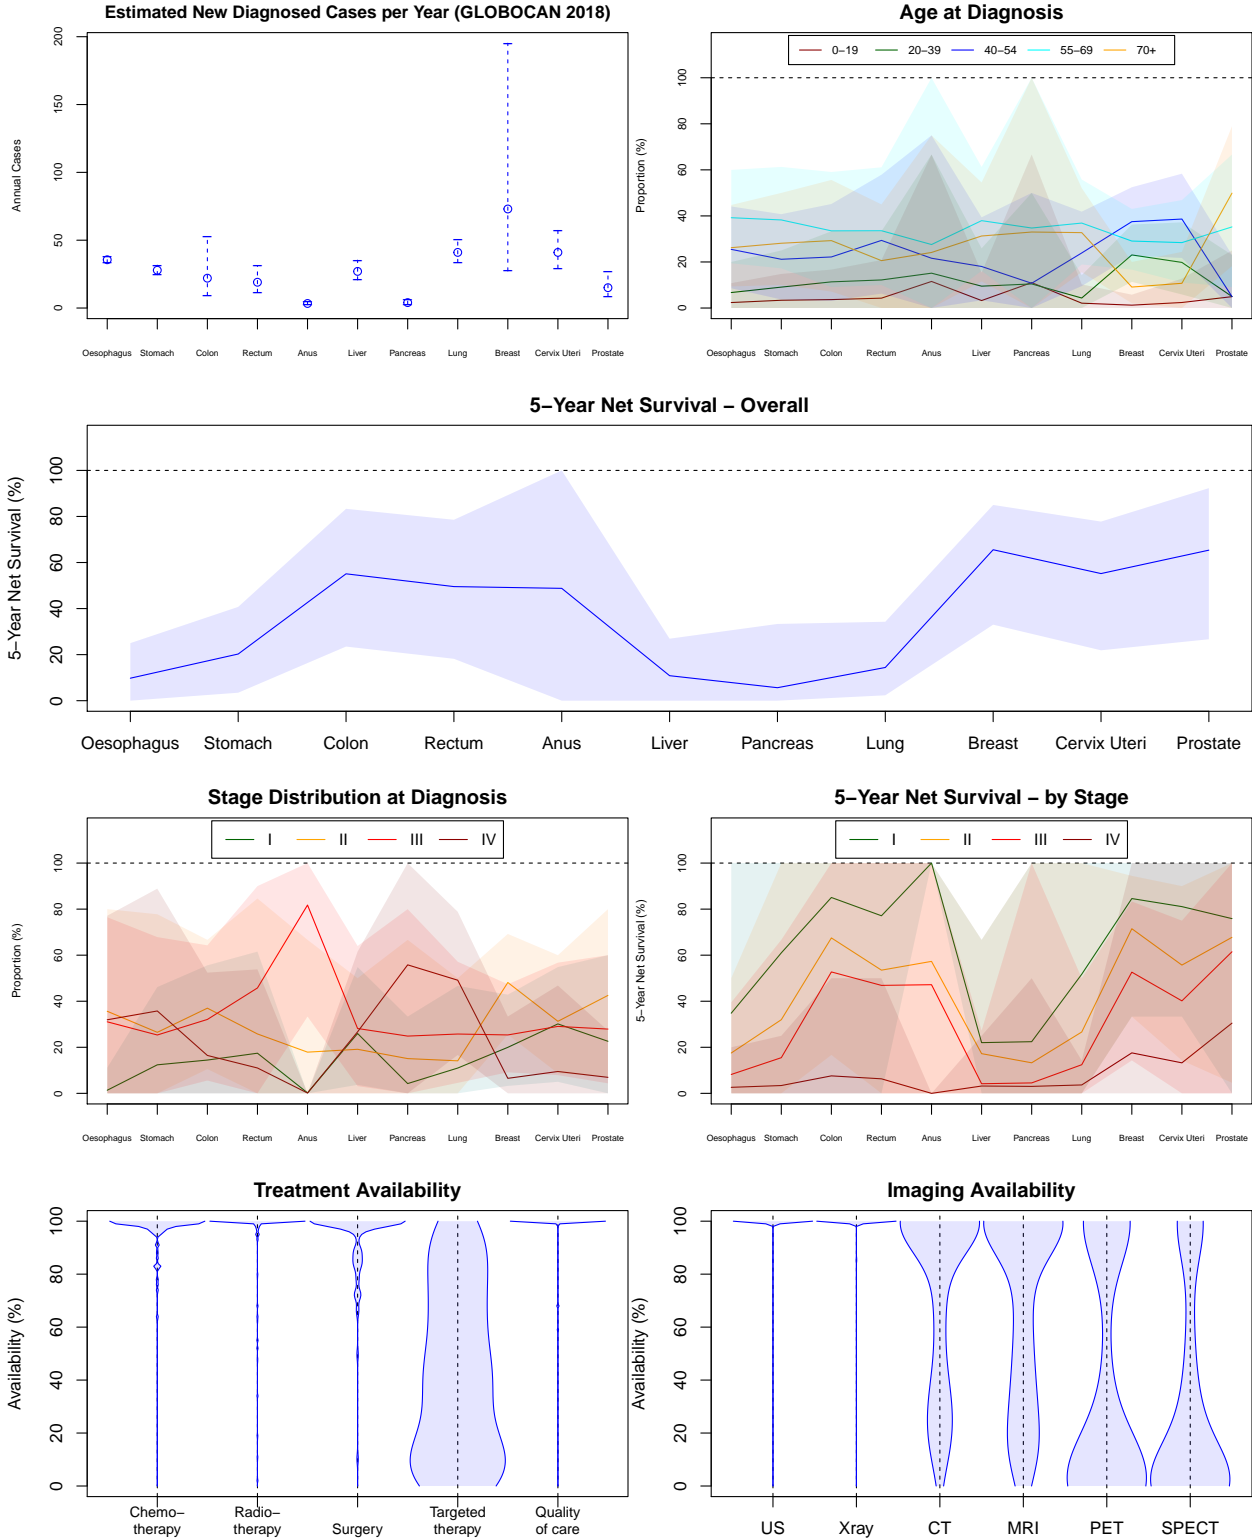

# Mali

| ISO Code | Region         | Area   | Income Group |
|----------|----------------|--------|--------------|
| MLI      | Western Africa | Africa | Low income   |

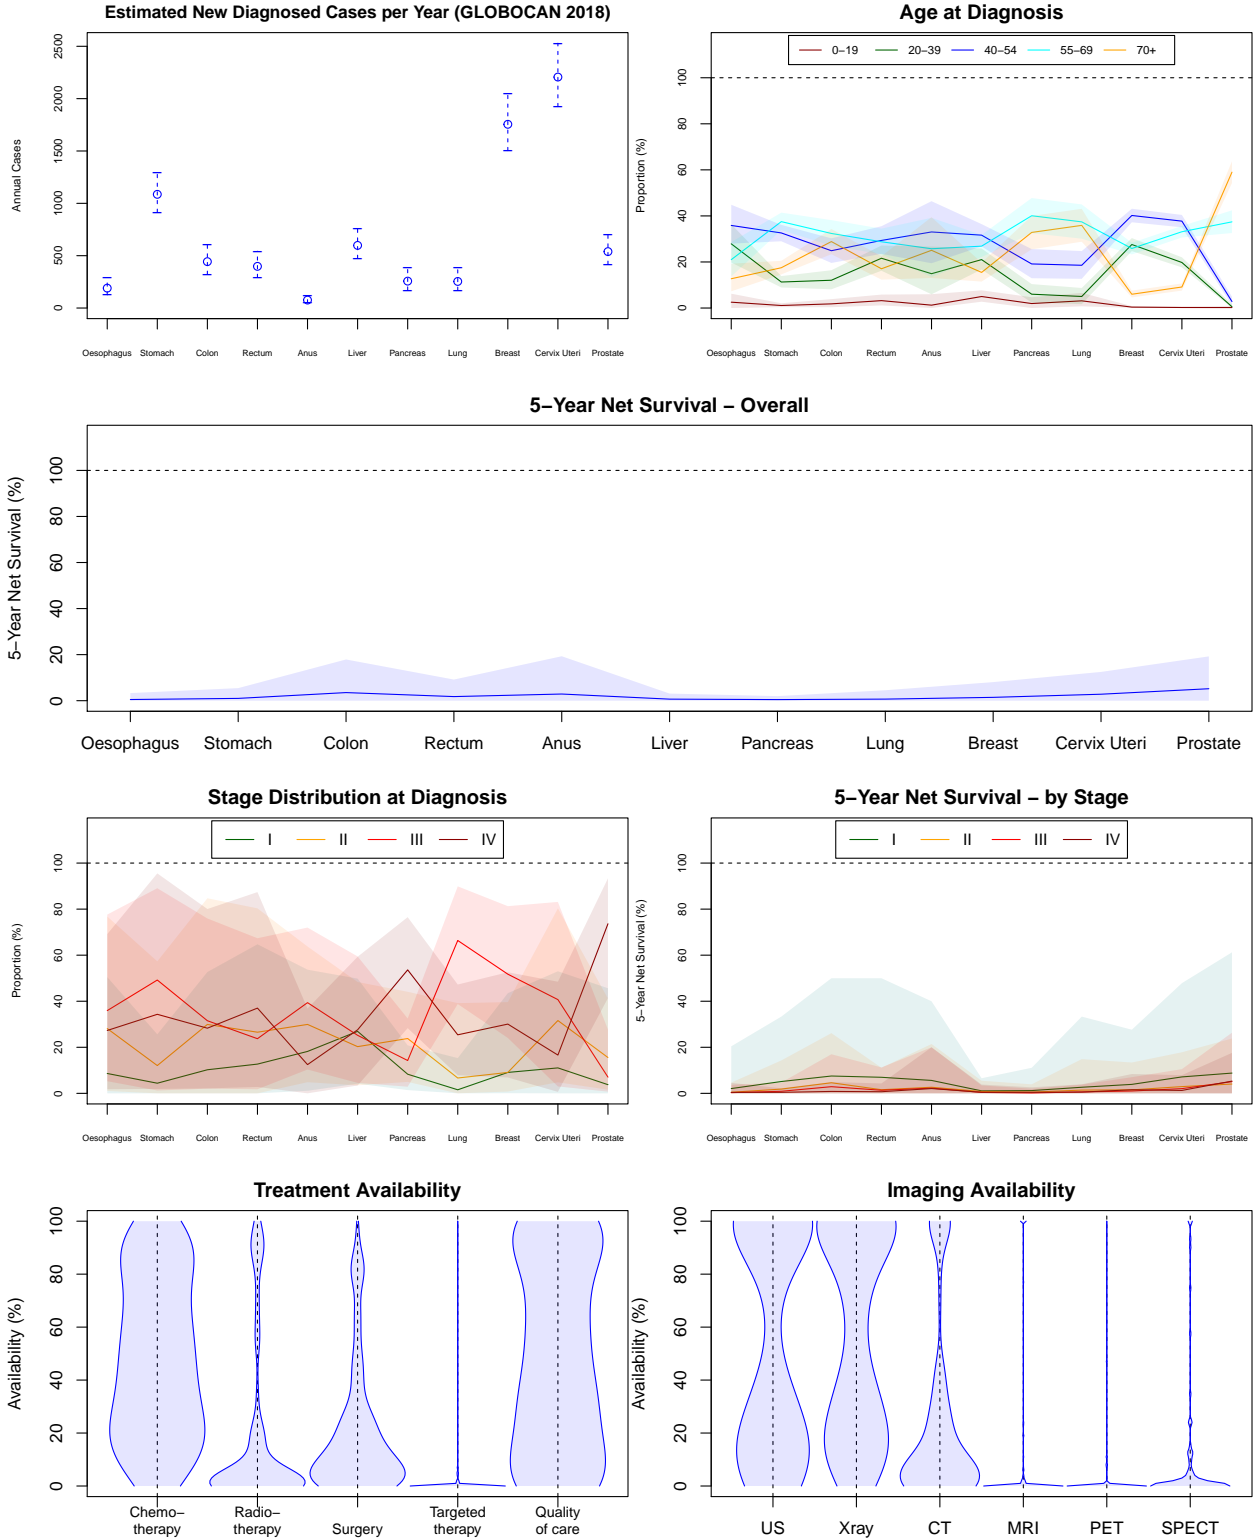

# Malta

| ISO Code | Region          | Area   | Income Group |
|----------|-----------------|--------|--------------|
| MLT      | Southern Europe | Europe | High income  |

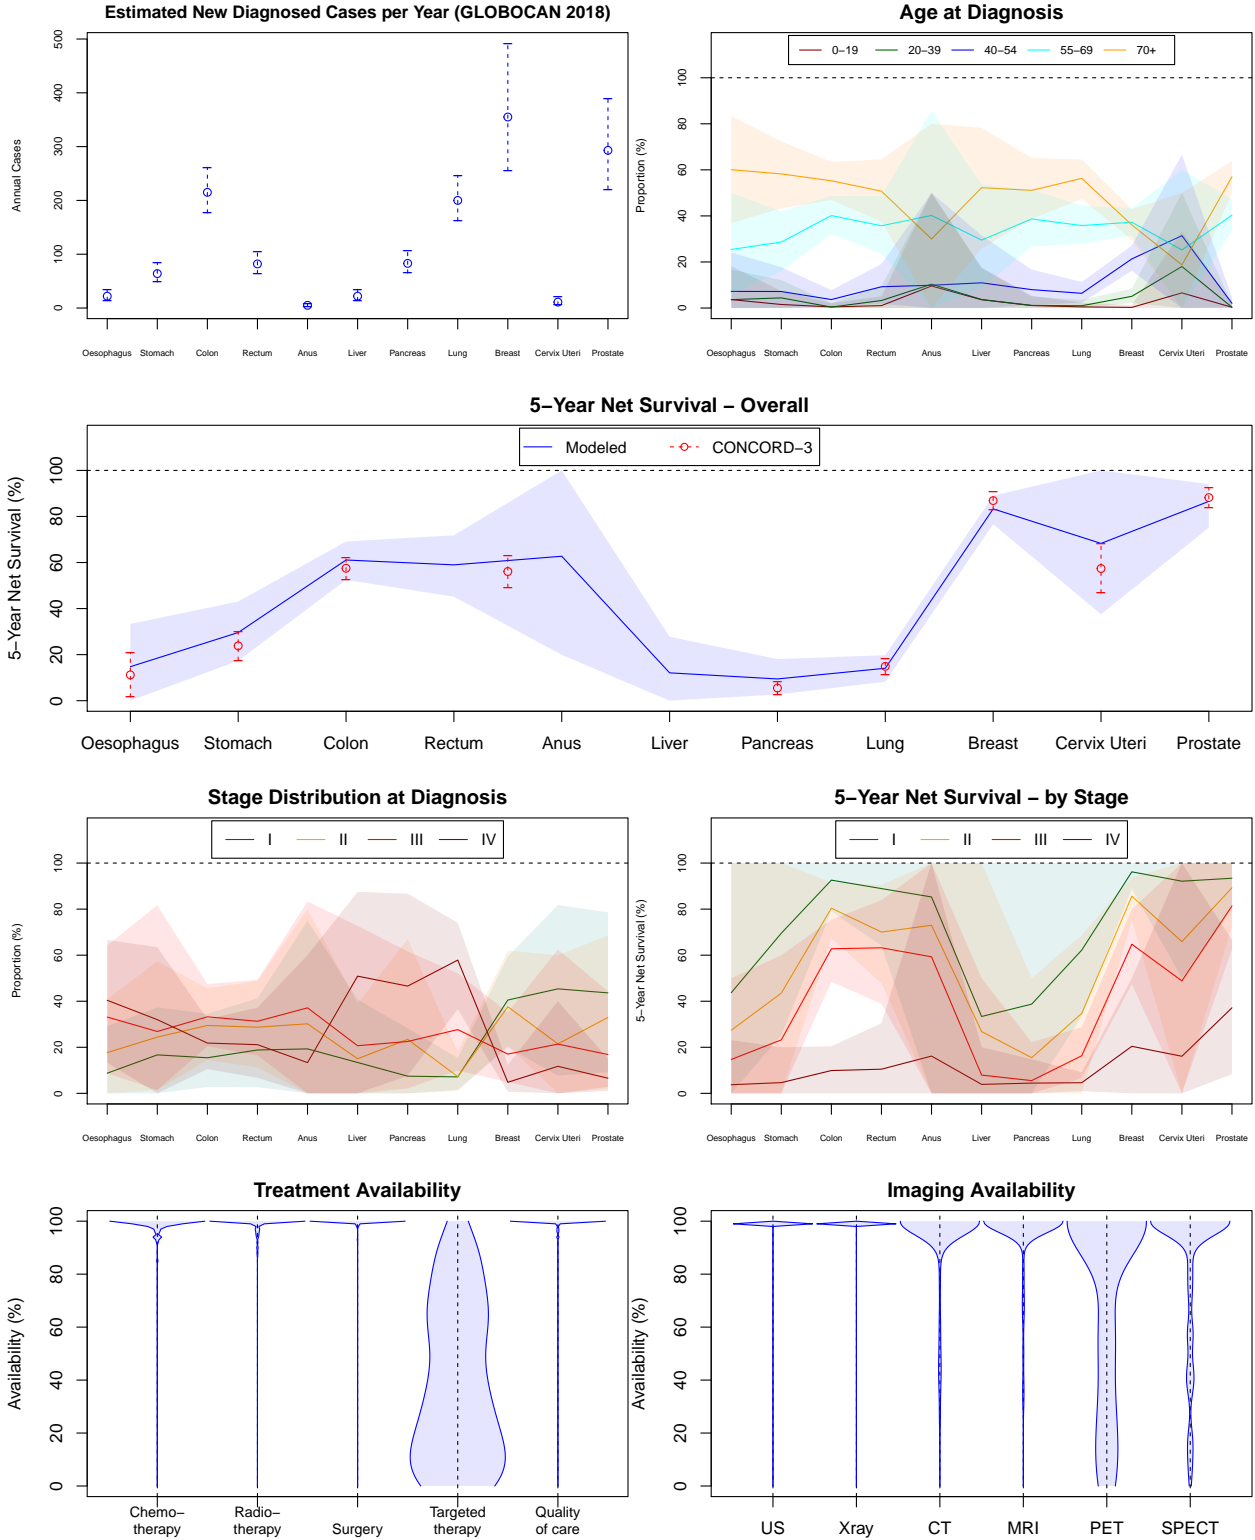

# Marshall Islands

| ISO Code | Region     | Area    | Income Group        |
|----------|------------|---------|---------------------|
| MHL      | Micronesia | Oceania | Upper middle income |

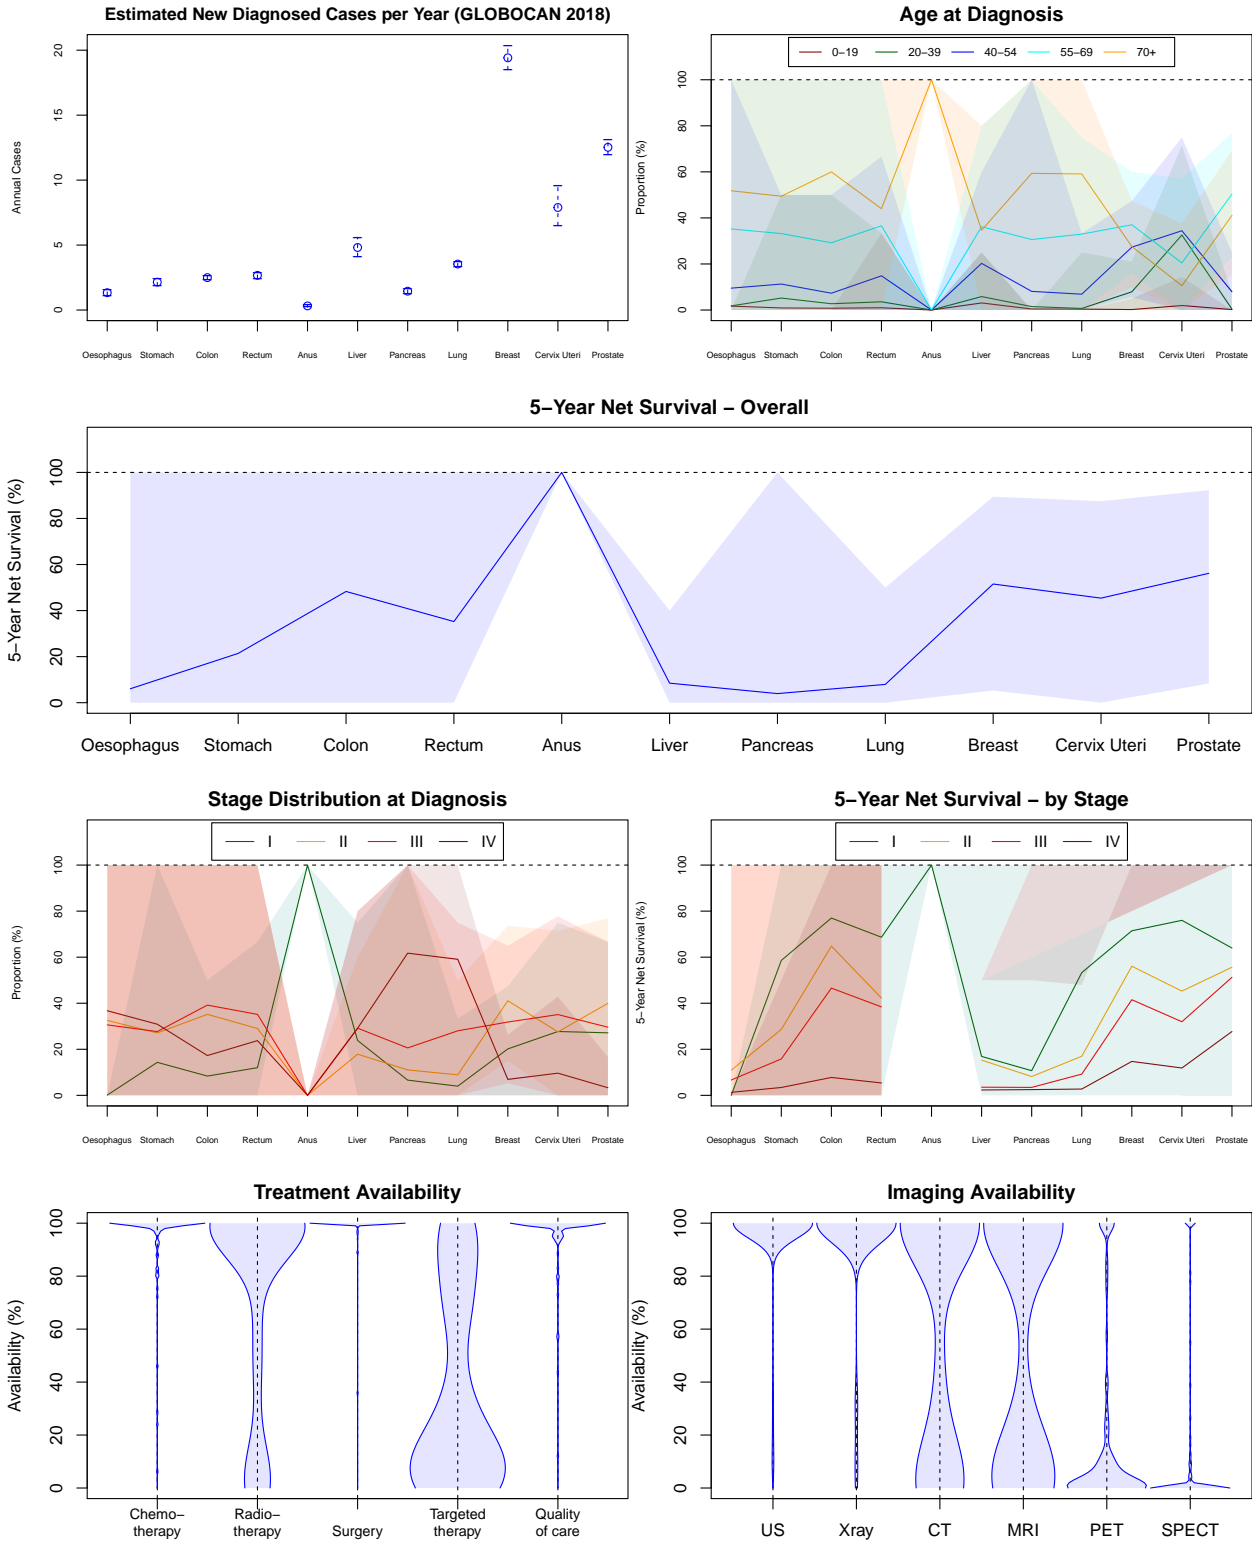

# Mauritania

| ISO Code | Region         | Area   | Income Group        |
|----------|----------------|--------|---------------------|
| MRT      | Western Africa | Africa | Lower middle income |

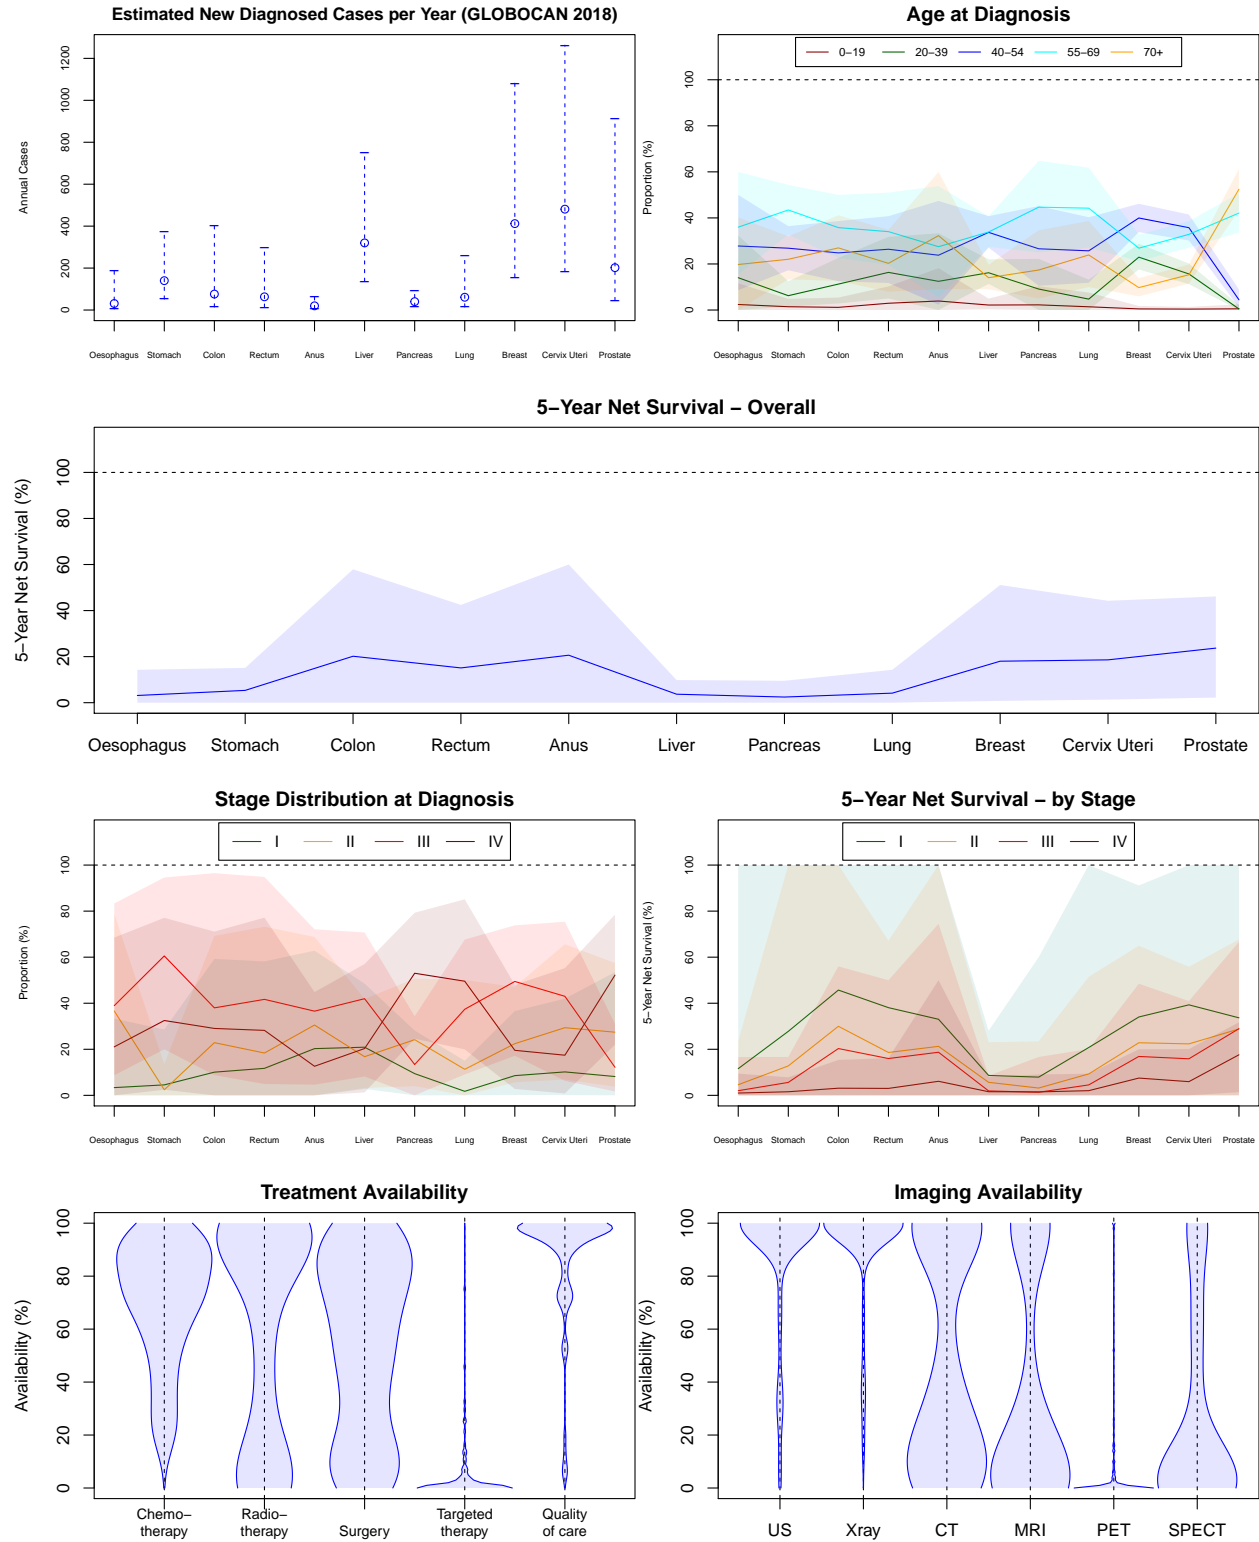

# Mauritius

| ISO Code | Region         | Area   | Income Group        |
|----------|----------------|--------|---------------------|
| MUS      | Eastern Africa | Africa | Upper middle income |

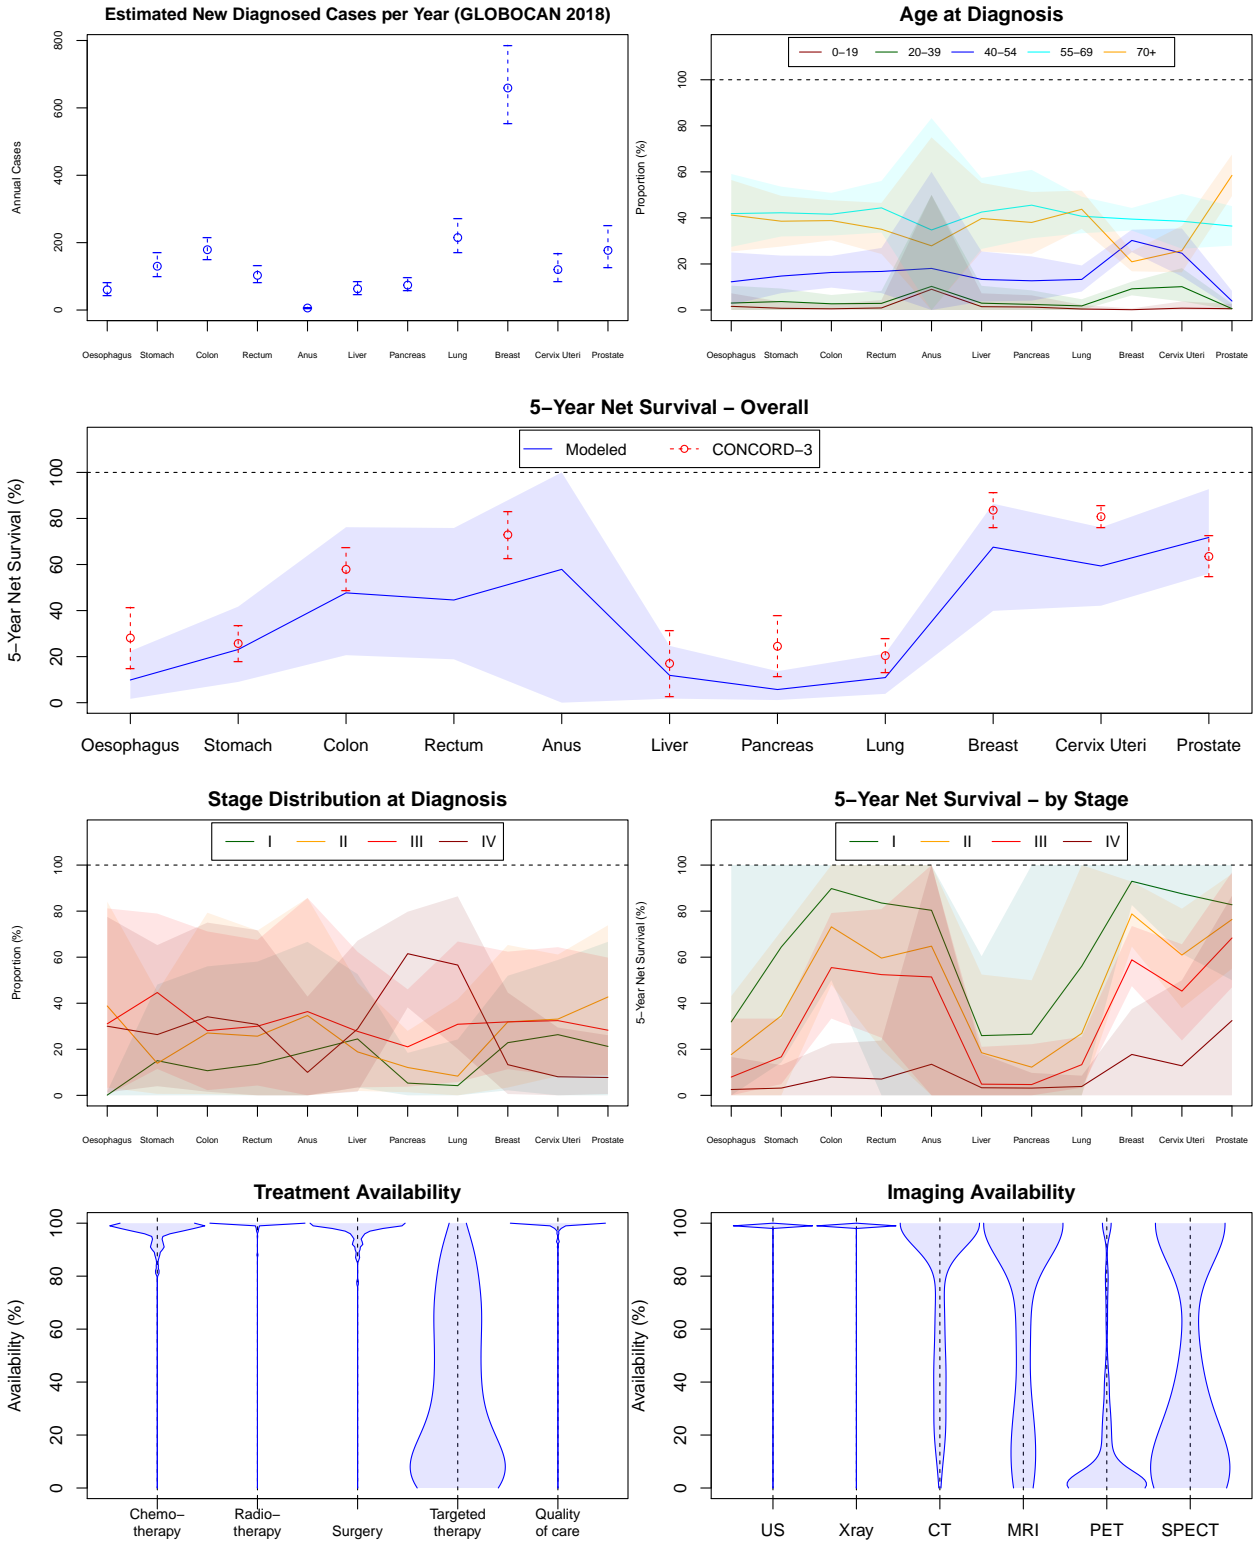



# Mexico

| ISO Code | Region          | Area                            | Income Group        |
|----------|-----------------|---------------------------------|---------------------|
| MEX      | Central America | Latin America and the Caribbean | Upper middle income |

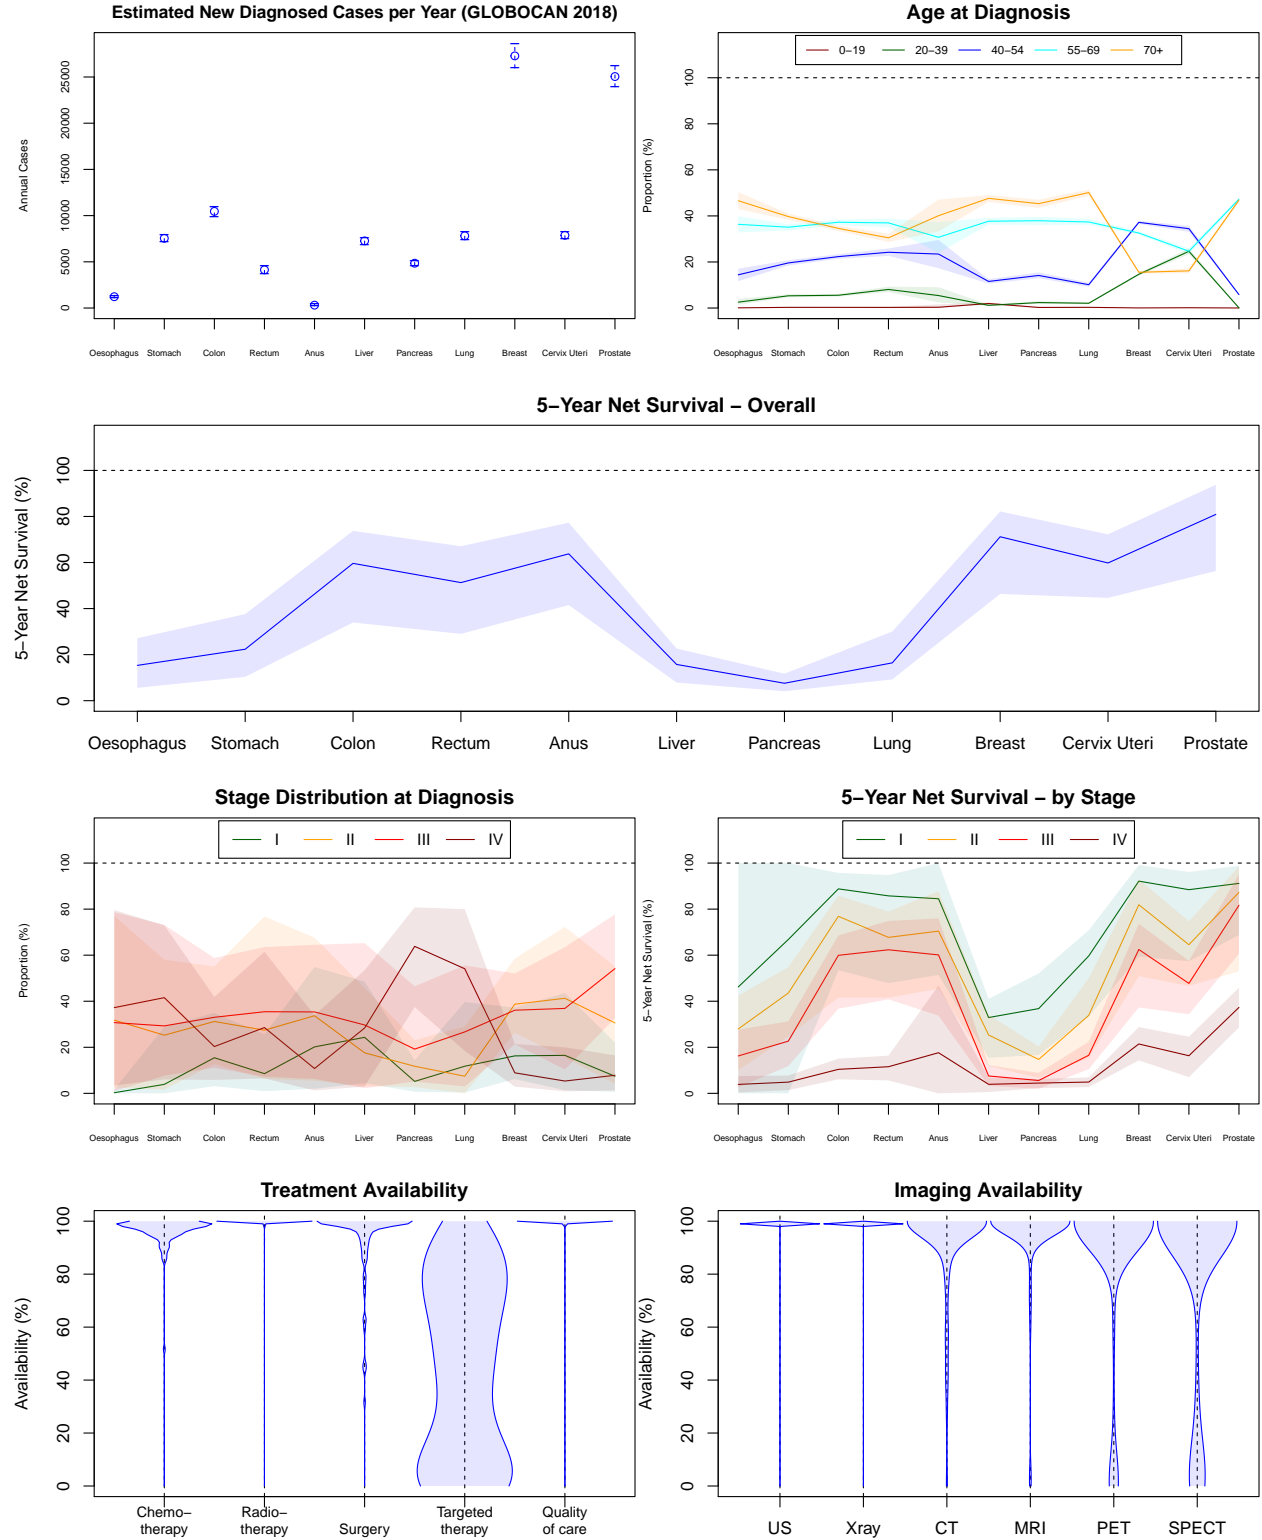

# Micronesia (Fed. States of)

| ISO Code | Region     | Area    | Income Group        |
|----------|------------|---------|---------------------|
| FSM      | Micronesia | Oceania | Lower middle income |

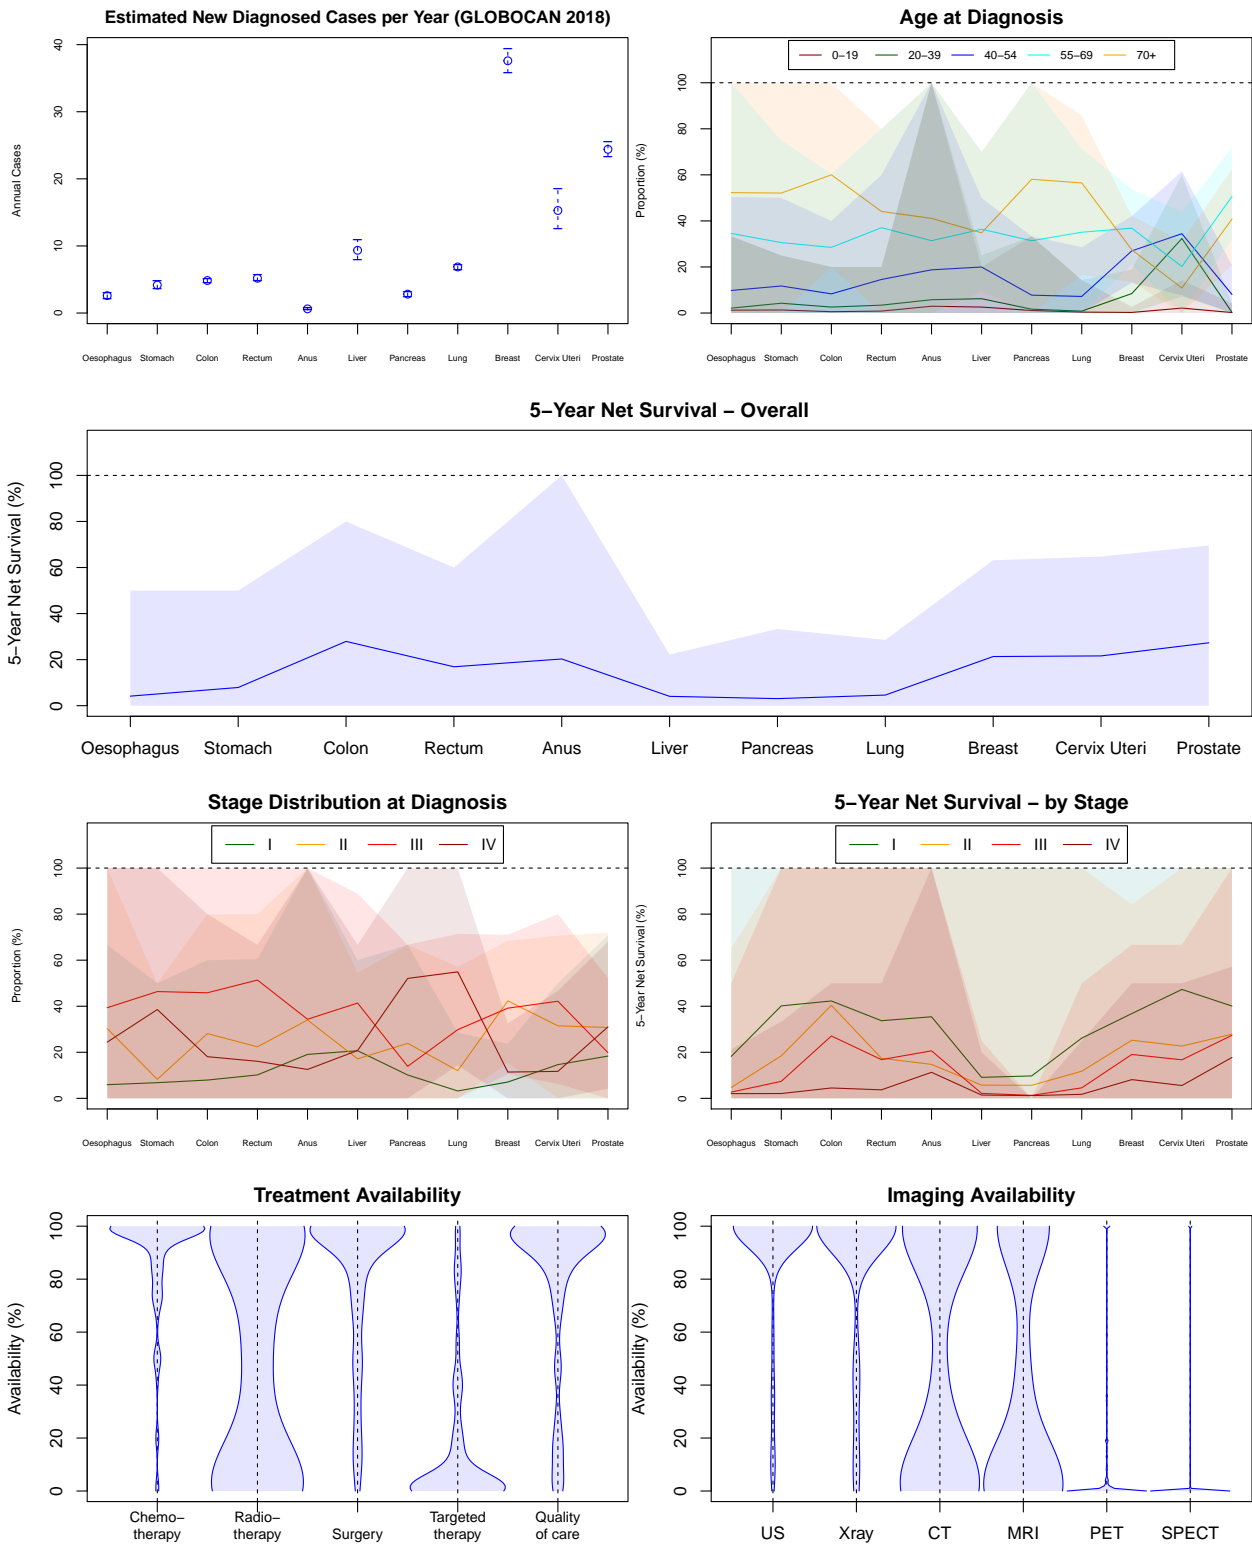

# Monaco

| ISO Code | Region         | Area   | Income Group |
|----------|----------------|--------|--------------|
| MCO      | Western Europe | Europe | High income  |

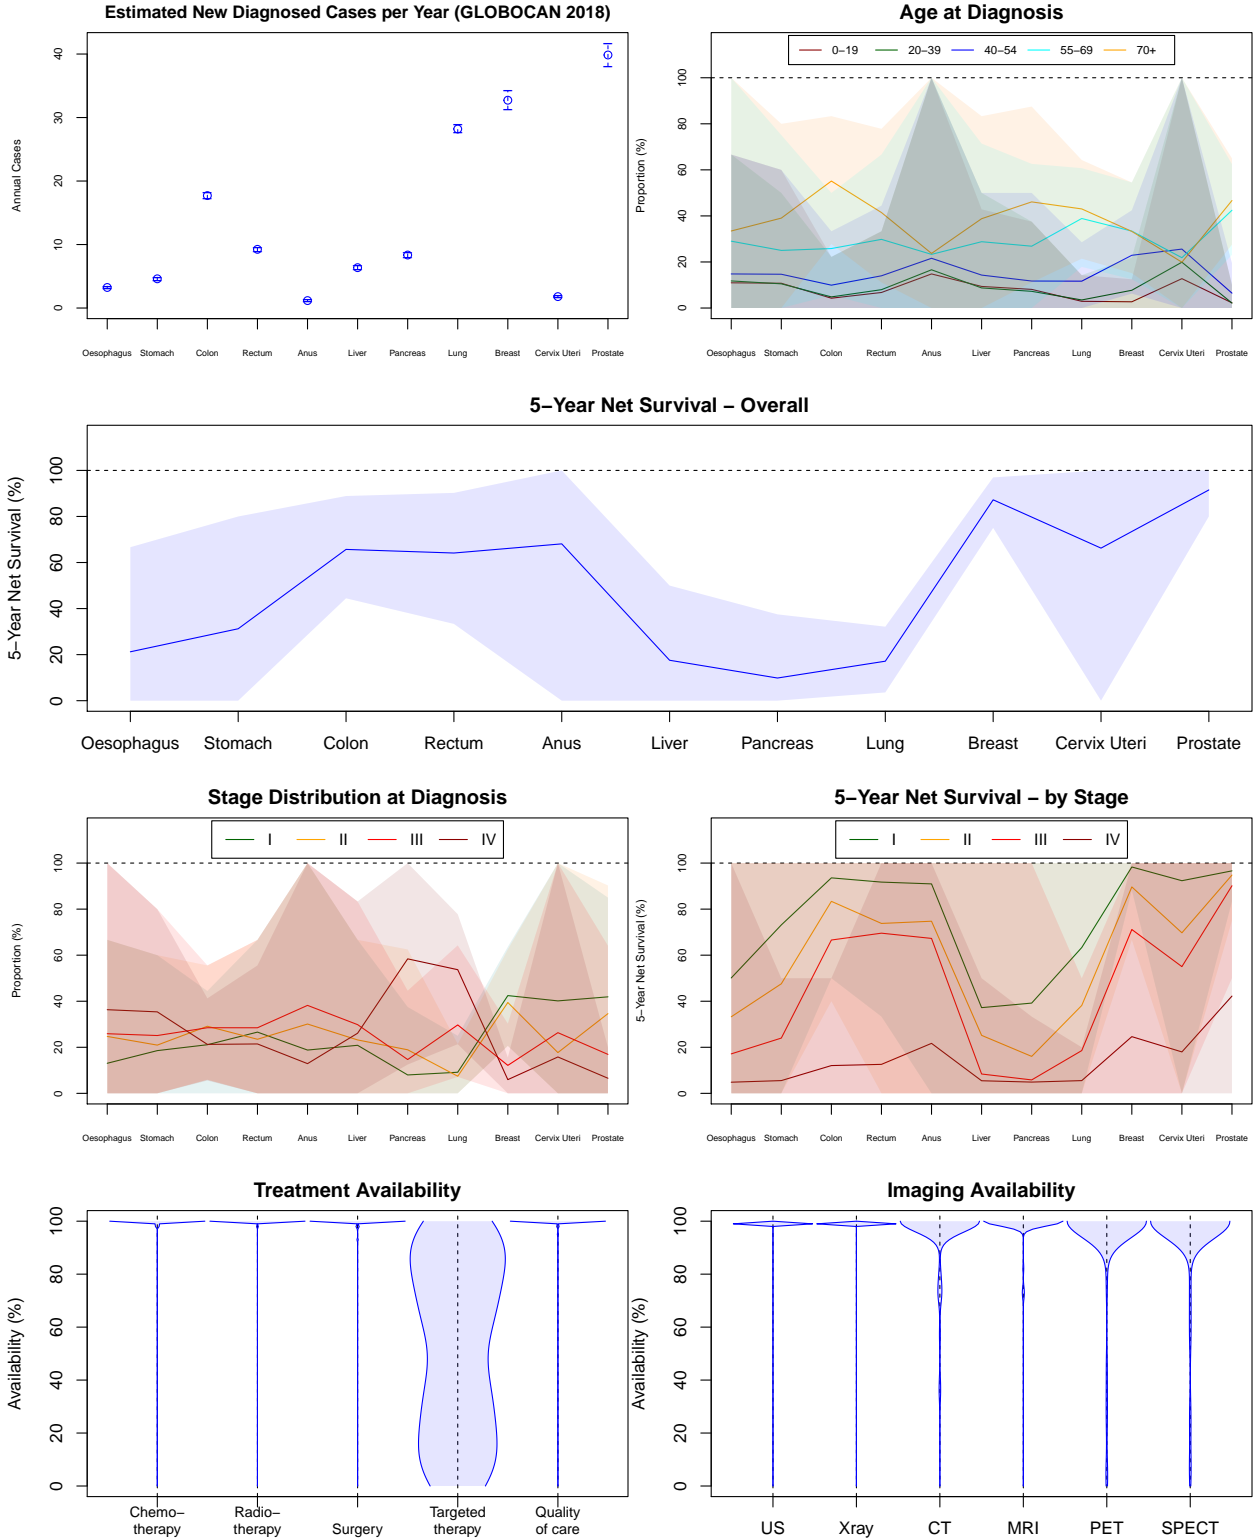

# Mongolia

| ISO Code | Region       | Area | Income Group        |
|----------|--------------|------|---------------------|
| MNG      | Eastern Asia | Asia | Lower middle income |

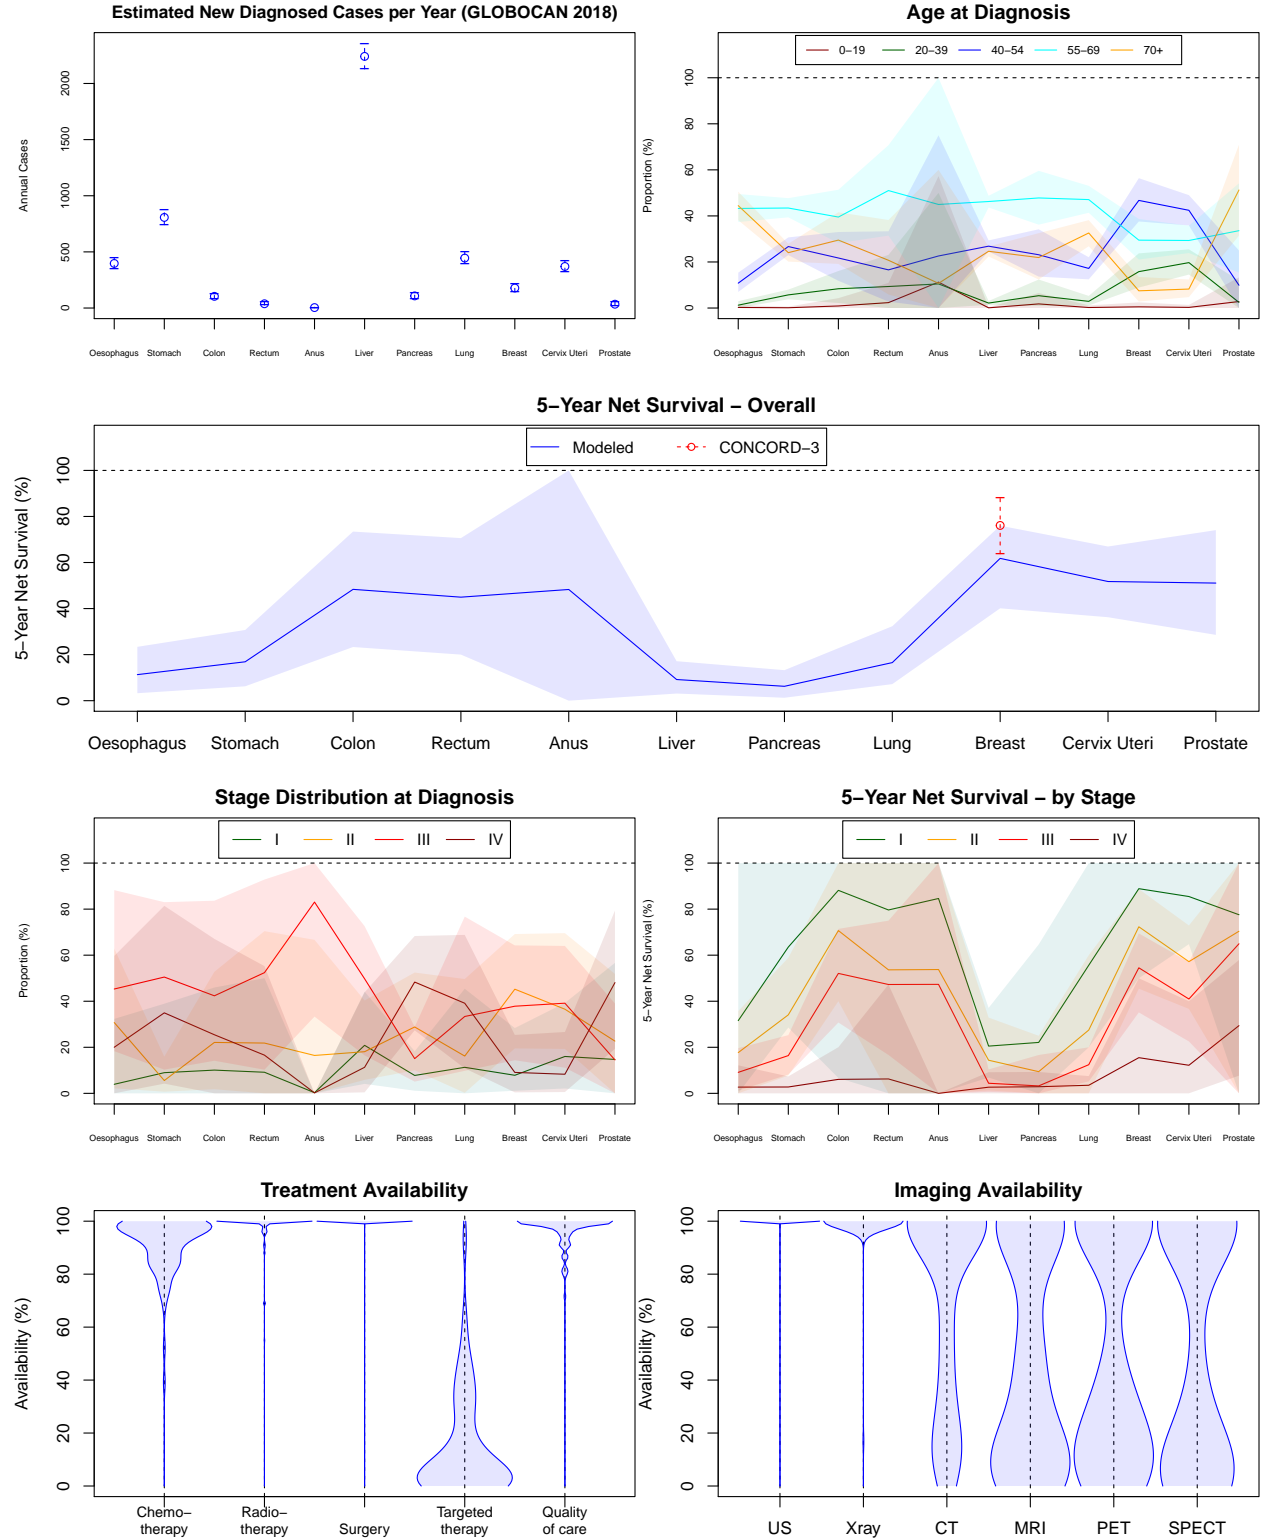

# Montenegro

| ISO Code | Region          | Area   | Income Group        |
|----------|-----------------|--------|---------------------|
| MNE      | Southern Europe | Europe | Upper middle income |

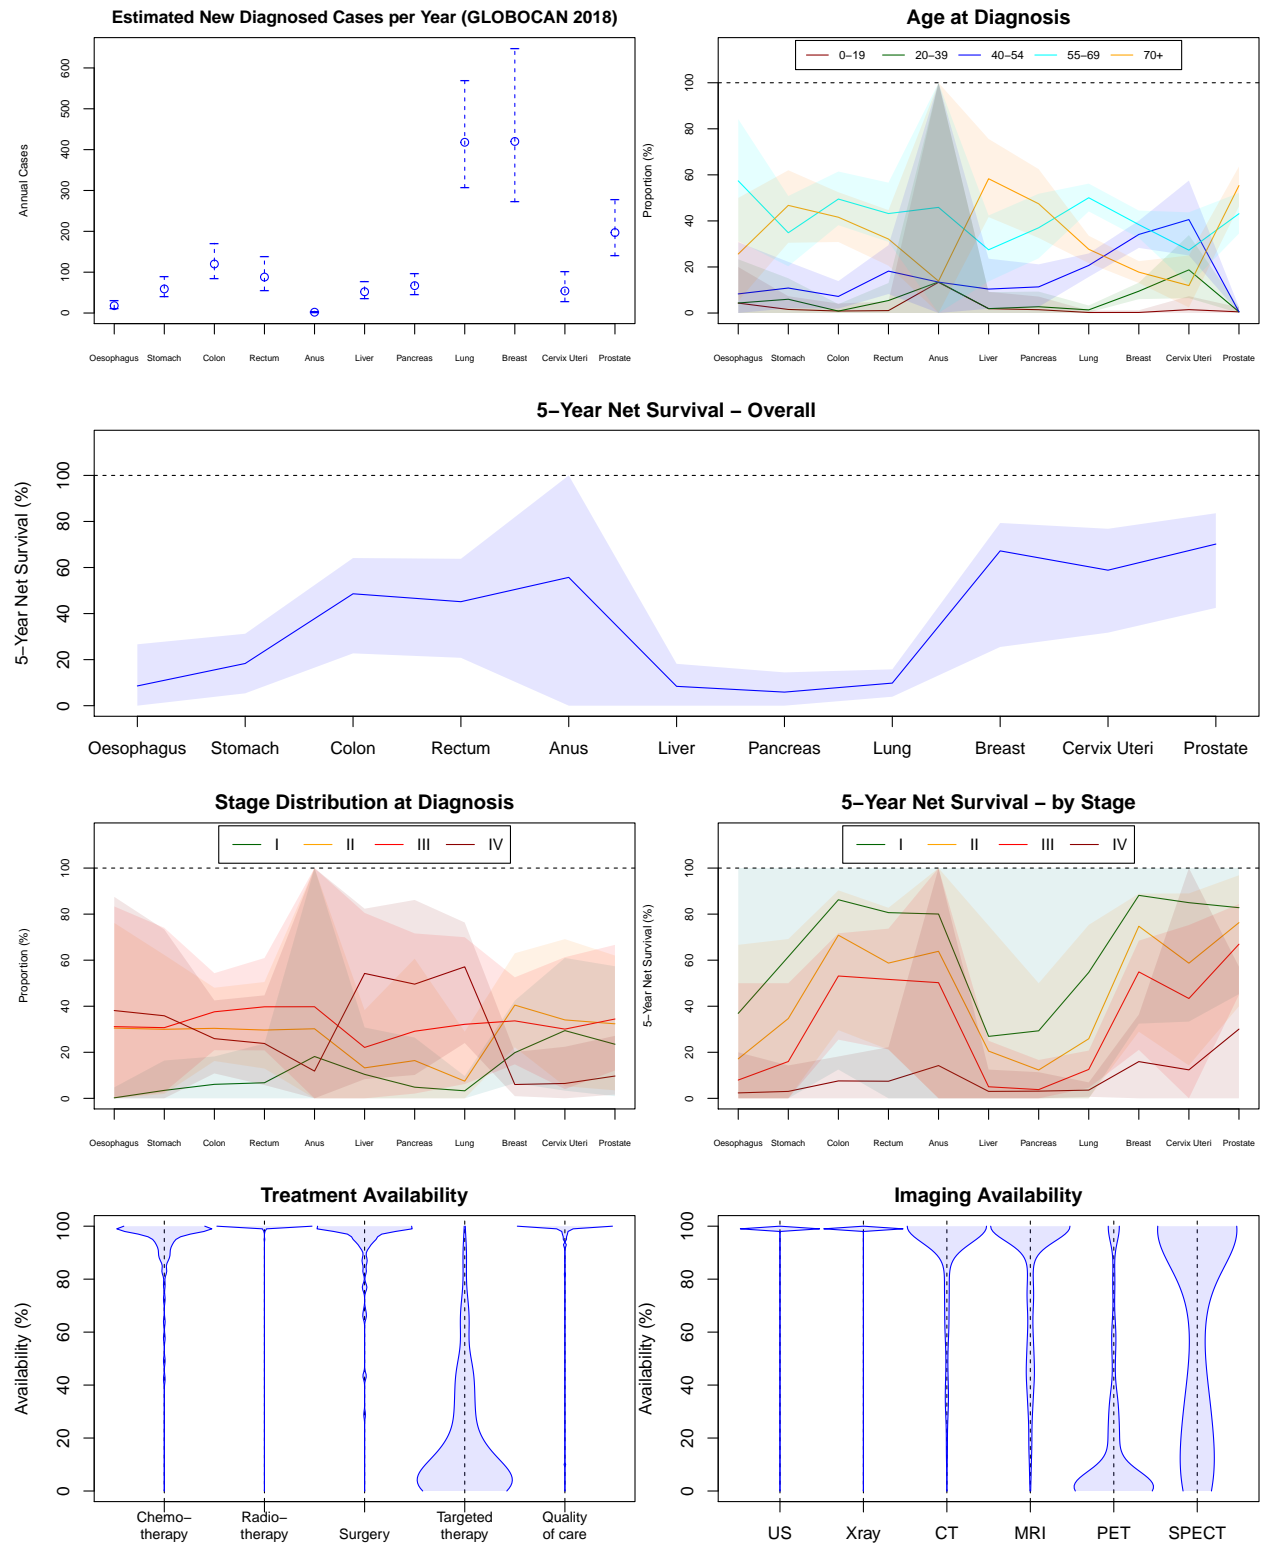

# Morocco

| ISO Code | Region          | Area   | Income Group        |
|----------|-----------------|--------|---------------------|
| MAR      | Northern Africa | Africa | Lower middle income |

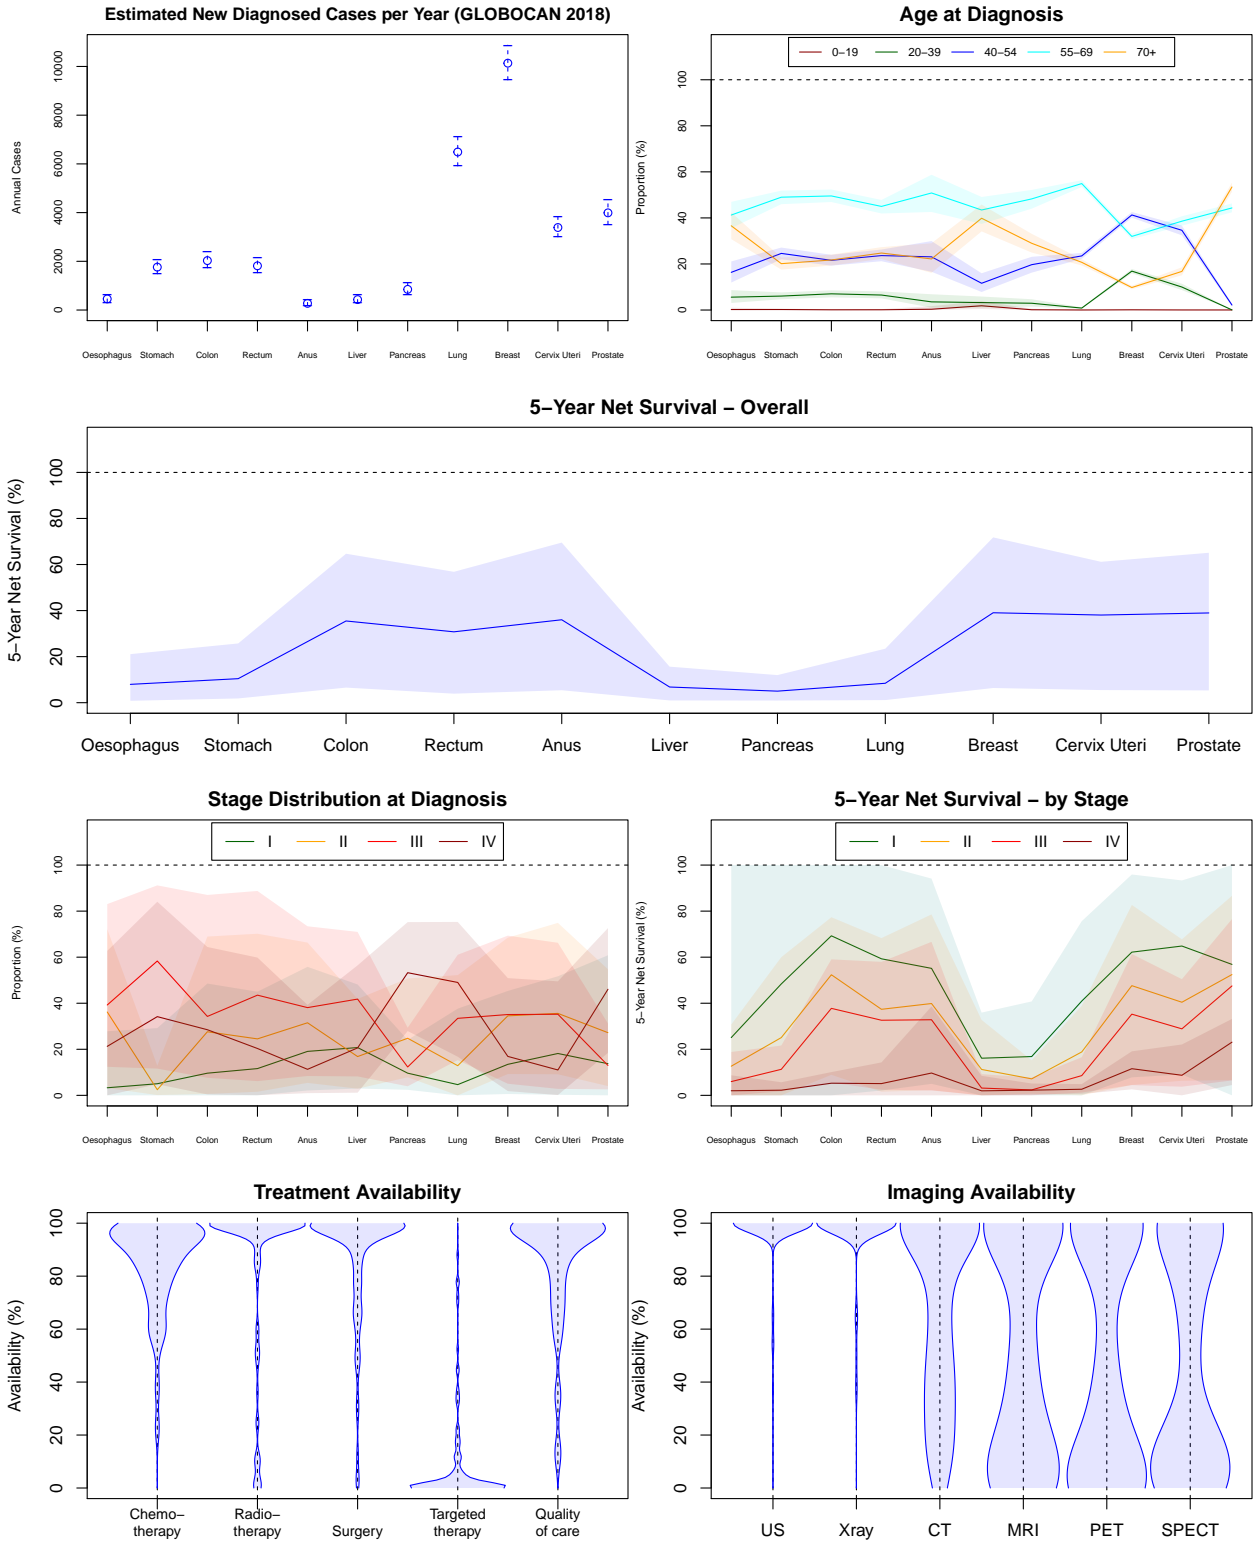

# Mozambique

| ISO Code | Region         | Area   | Income Group |
|----------|----------------|--------|--------------|
| MOZ      | Eastern Africa | Africa | Low income   |

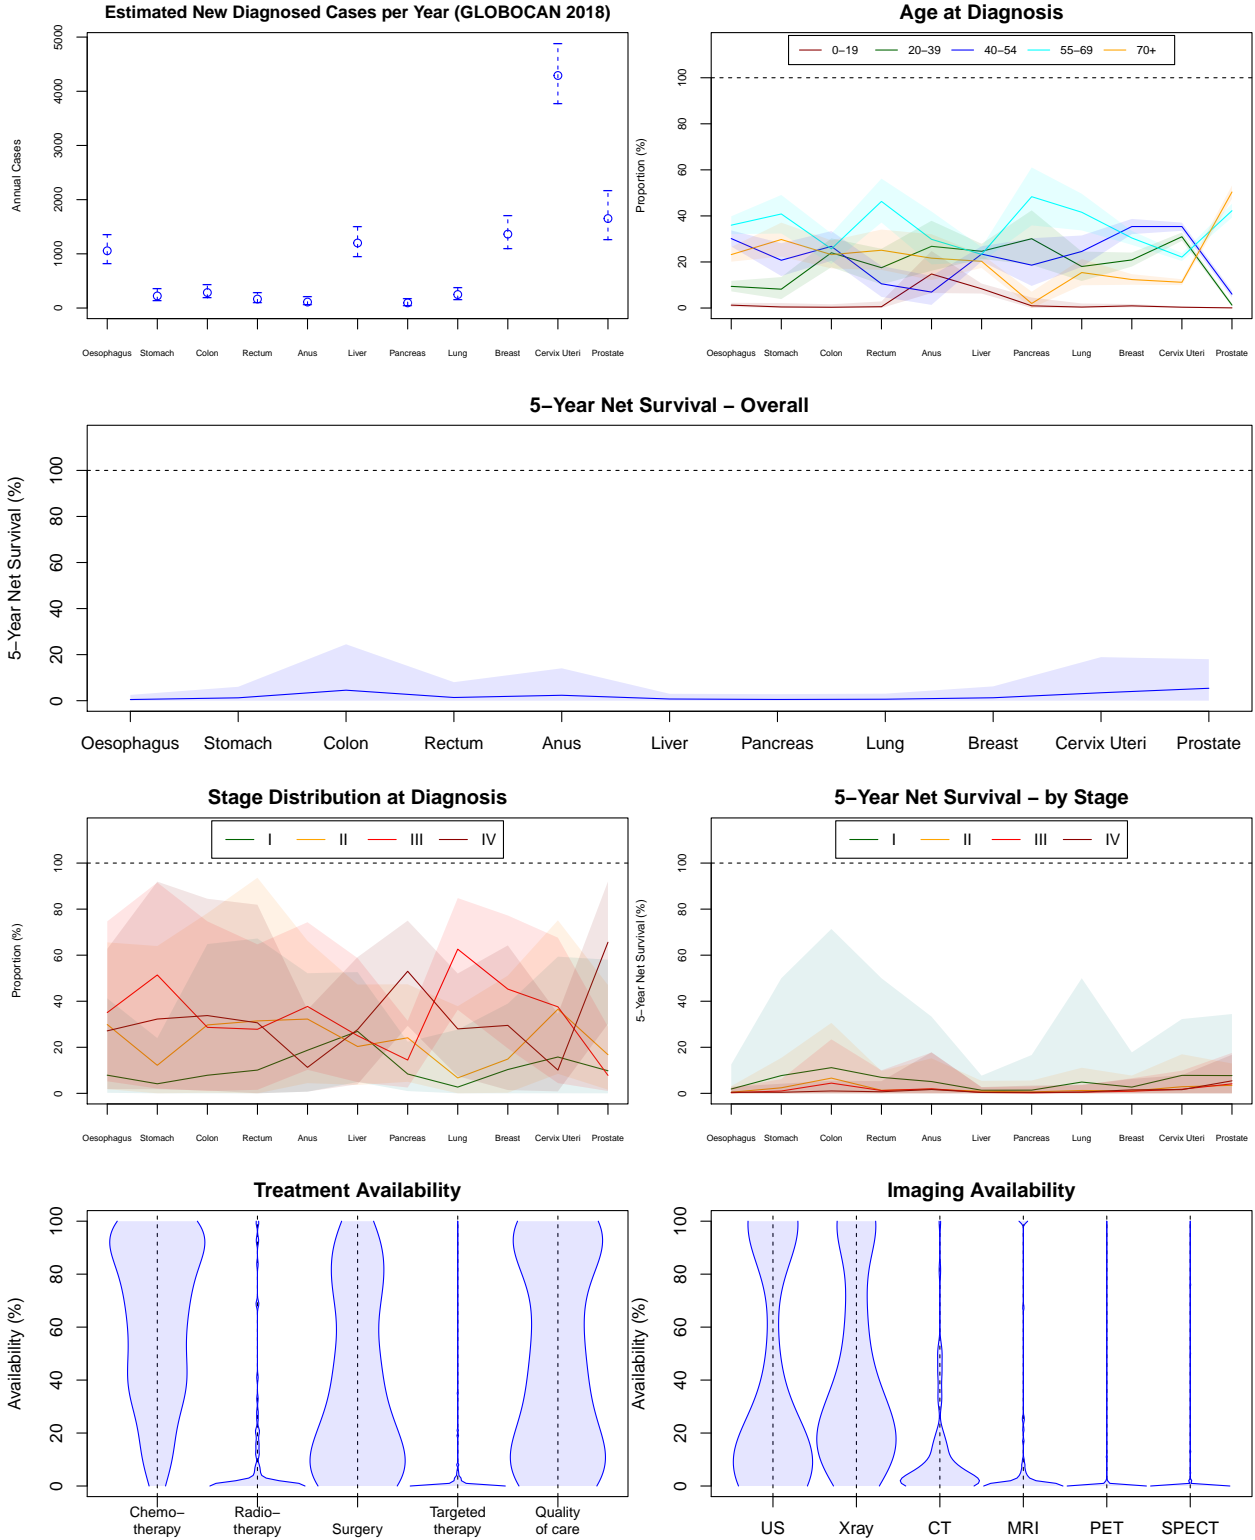

# Myanmar

| ISO Code | Region             | Area | Income Group        |
|----------|--------------------|------|---------------------|
| MMR      | South-Eastern Asia | Asia | Lower middle income |

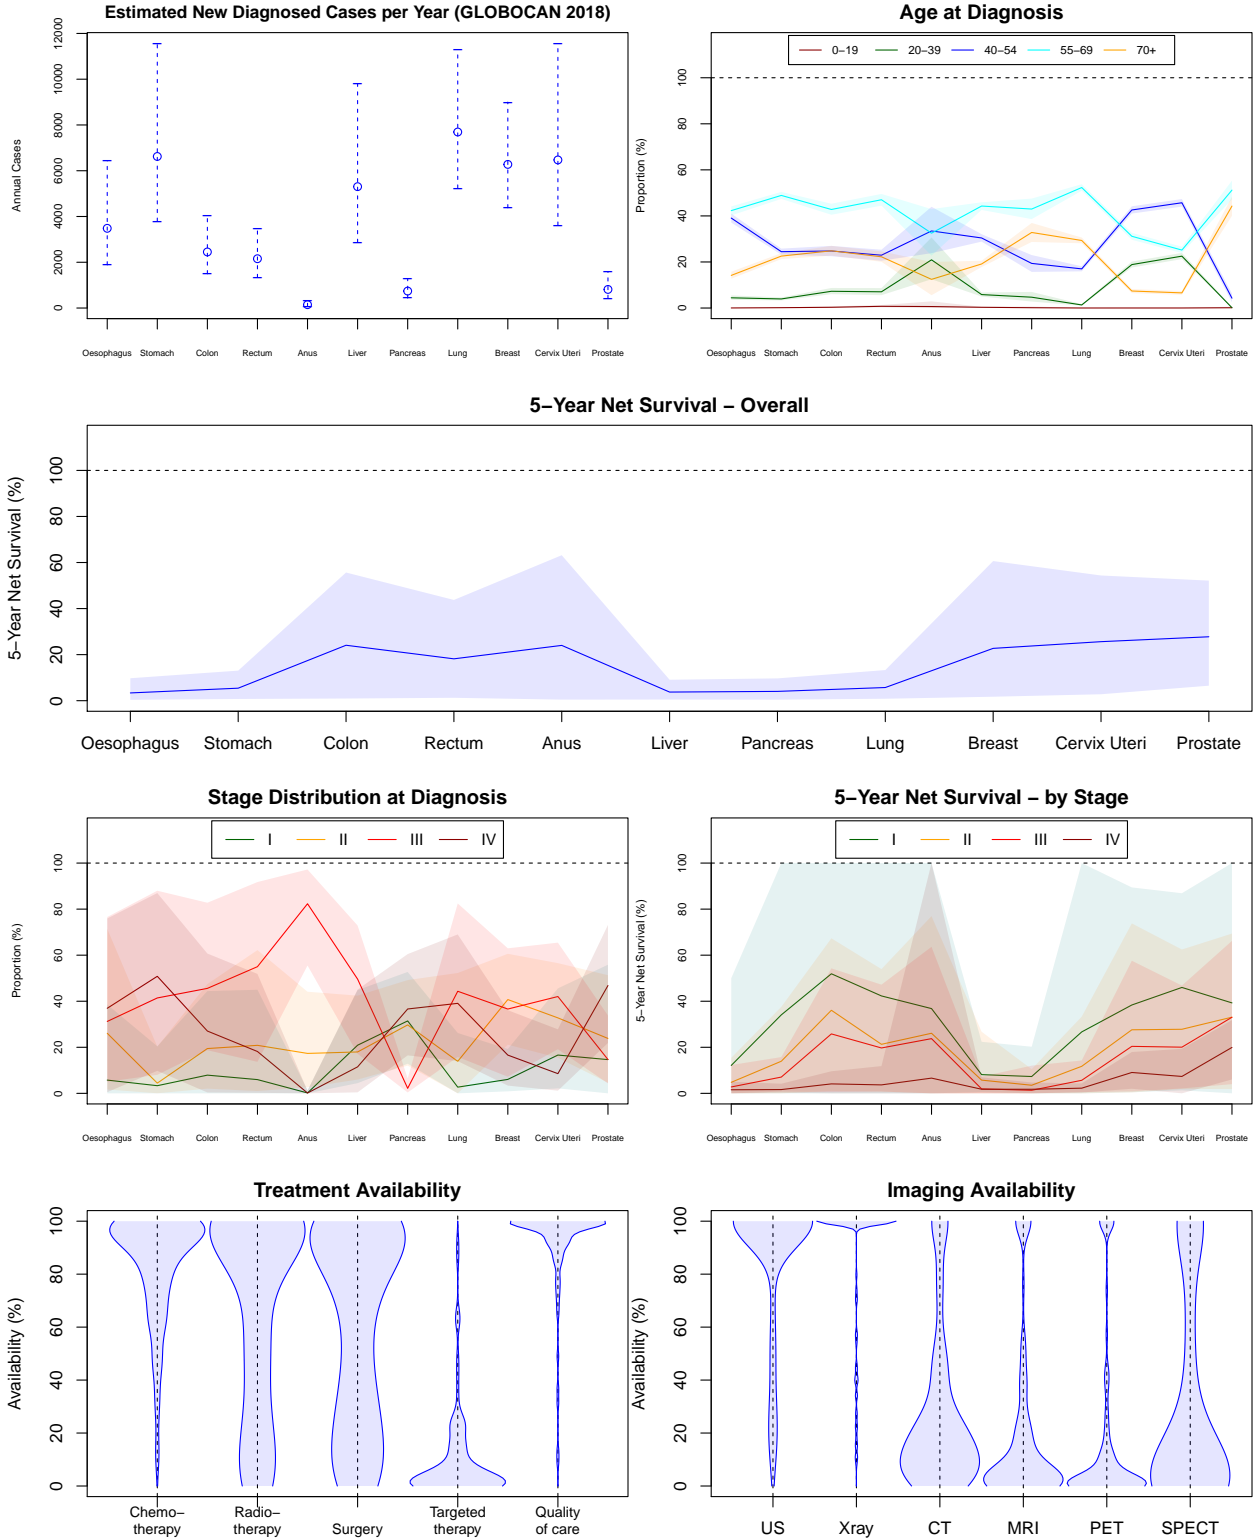



# Namibia

| ISO Code | Region          | Area   | Income Group        |
|----------|-----------------|--------|---------------------|
| NAM      | Southern Africa | Africa | Upper middle income |

**Estimated New Diagnosed Cases per Year (GLOBOCAN 2018)**

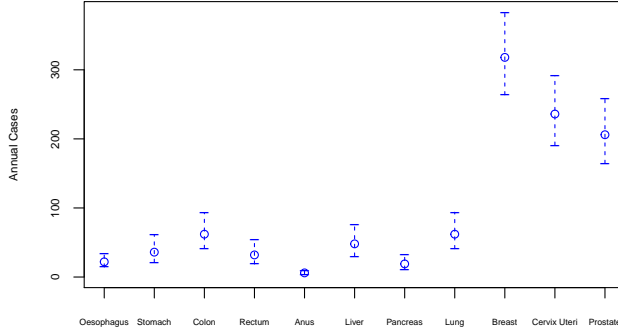

**Age at Diagnosis**

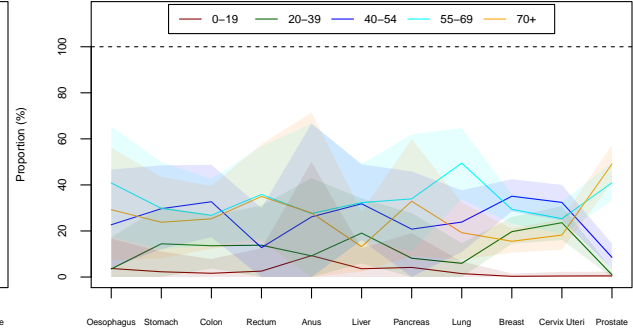

**5-Year Net Survival – Overall**

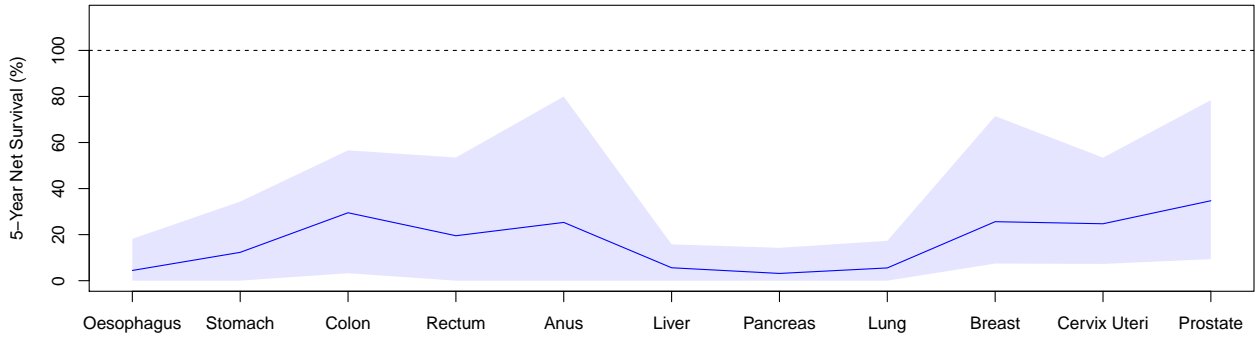

**Stage Distribution at Diagnosis**

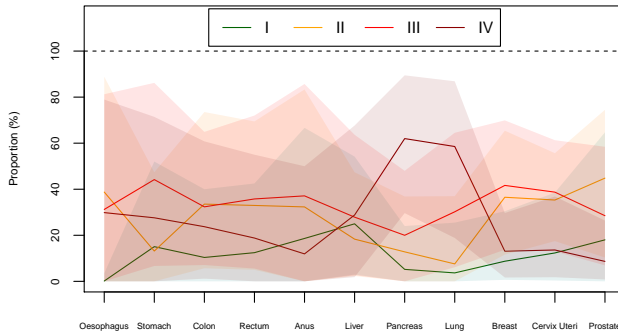

**5-Year Net Survival – by Stage**

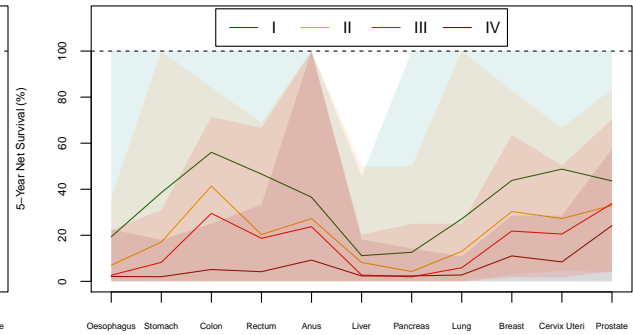

**Treatment Availability**

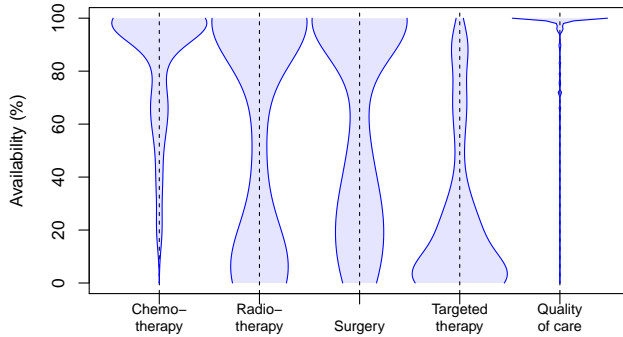

**Imaging Availability**

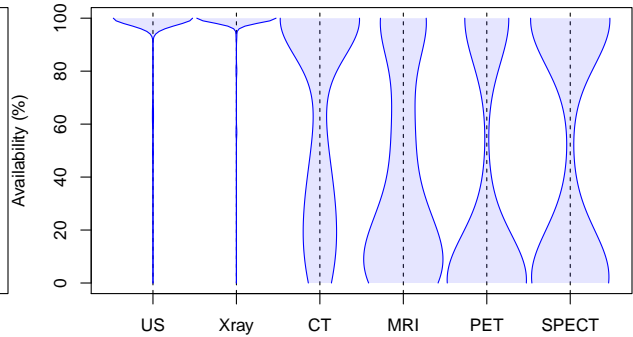

# Nauru

| ISO Code | Region     | Area    | Income Group        |
|----------|------------|---------|---------------------|
| NRU      | Micronesia | Oceania | Upper middle income |

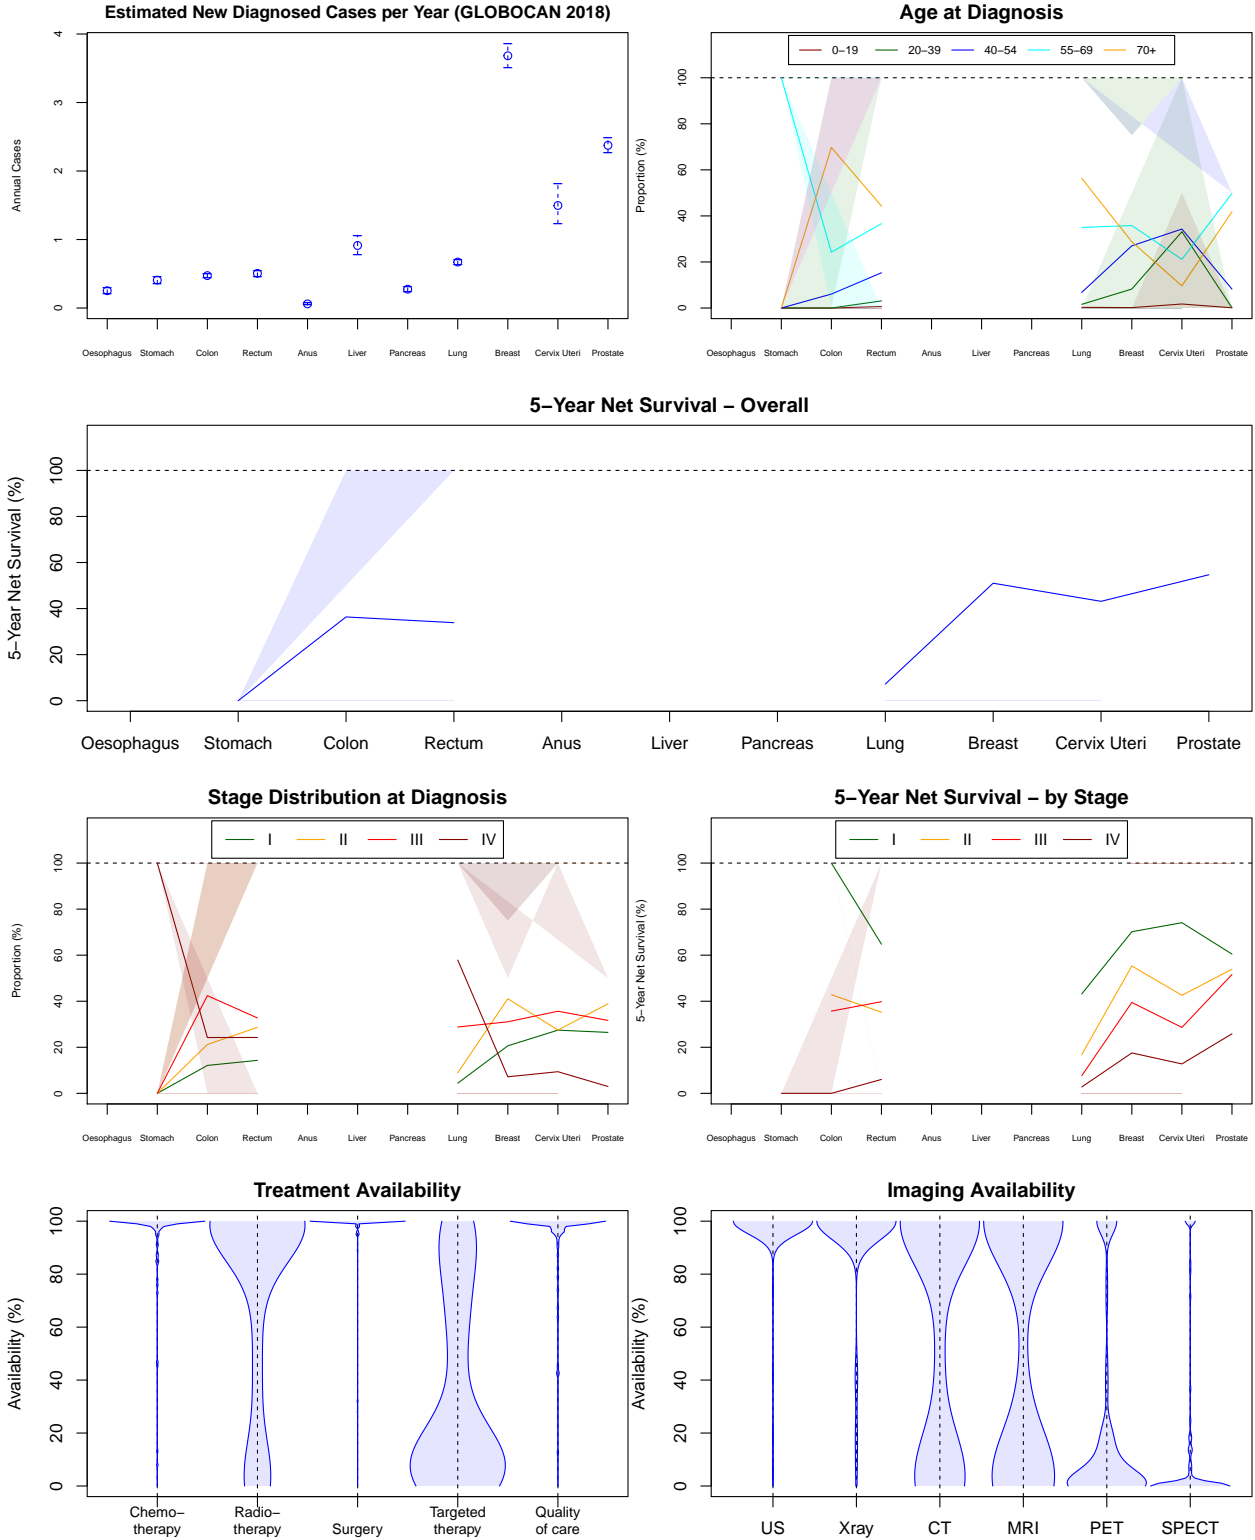

# Nepal

| ISO Code | Region        | Area | Income Group |
|----------|---------------|------|--------------|
| NPL      | Southern Asia | Asia | Low income   |

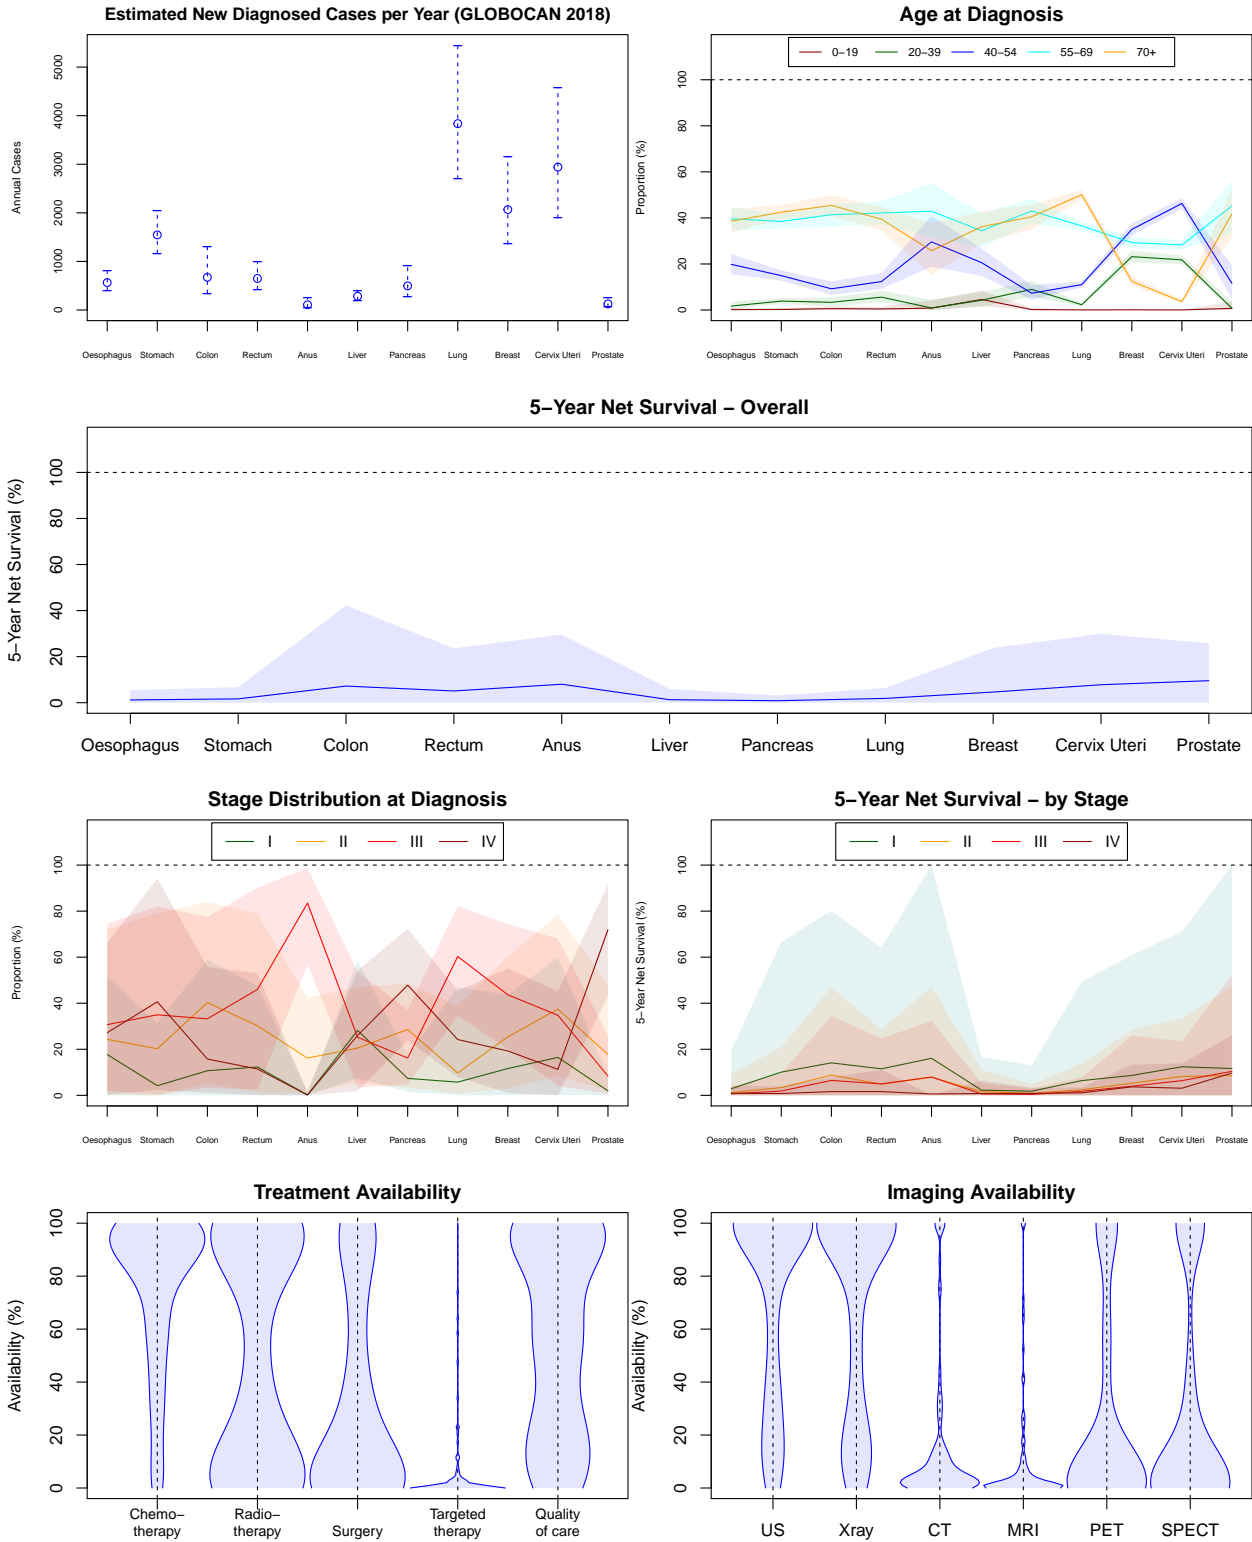

# Netherlands

| ISO Code | Region         | Area   | Income Group |
|----------|----------------|--------|--------------|
| NLD      | Western Europe | Europe | High income  |

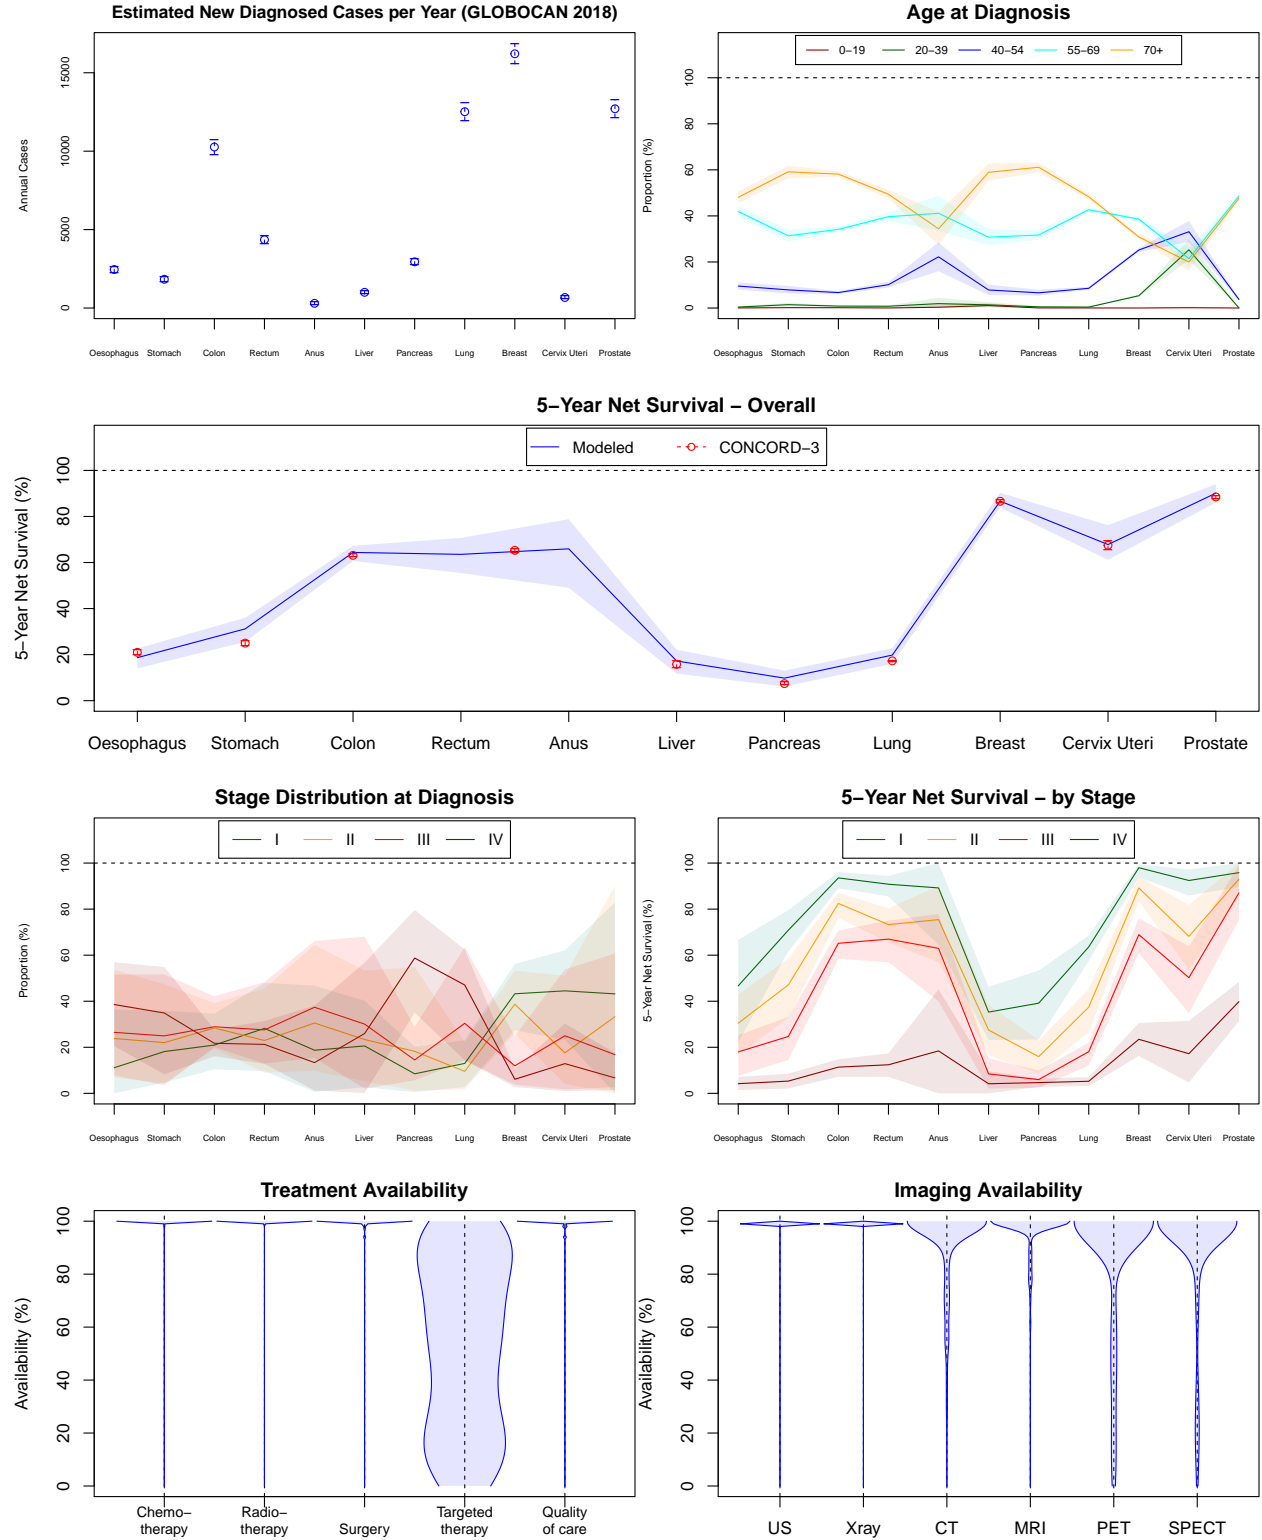

# New Zealand

| ISO Code | Region                | Area    | Income Group |
|----------|-----------------------|---------|--------------|
| NZL      | Australia/New Zealand | Oceania | High income  |

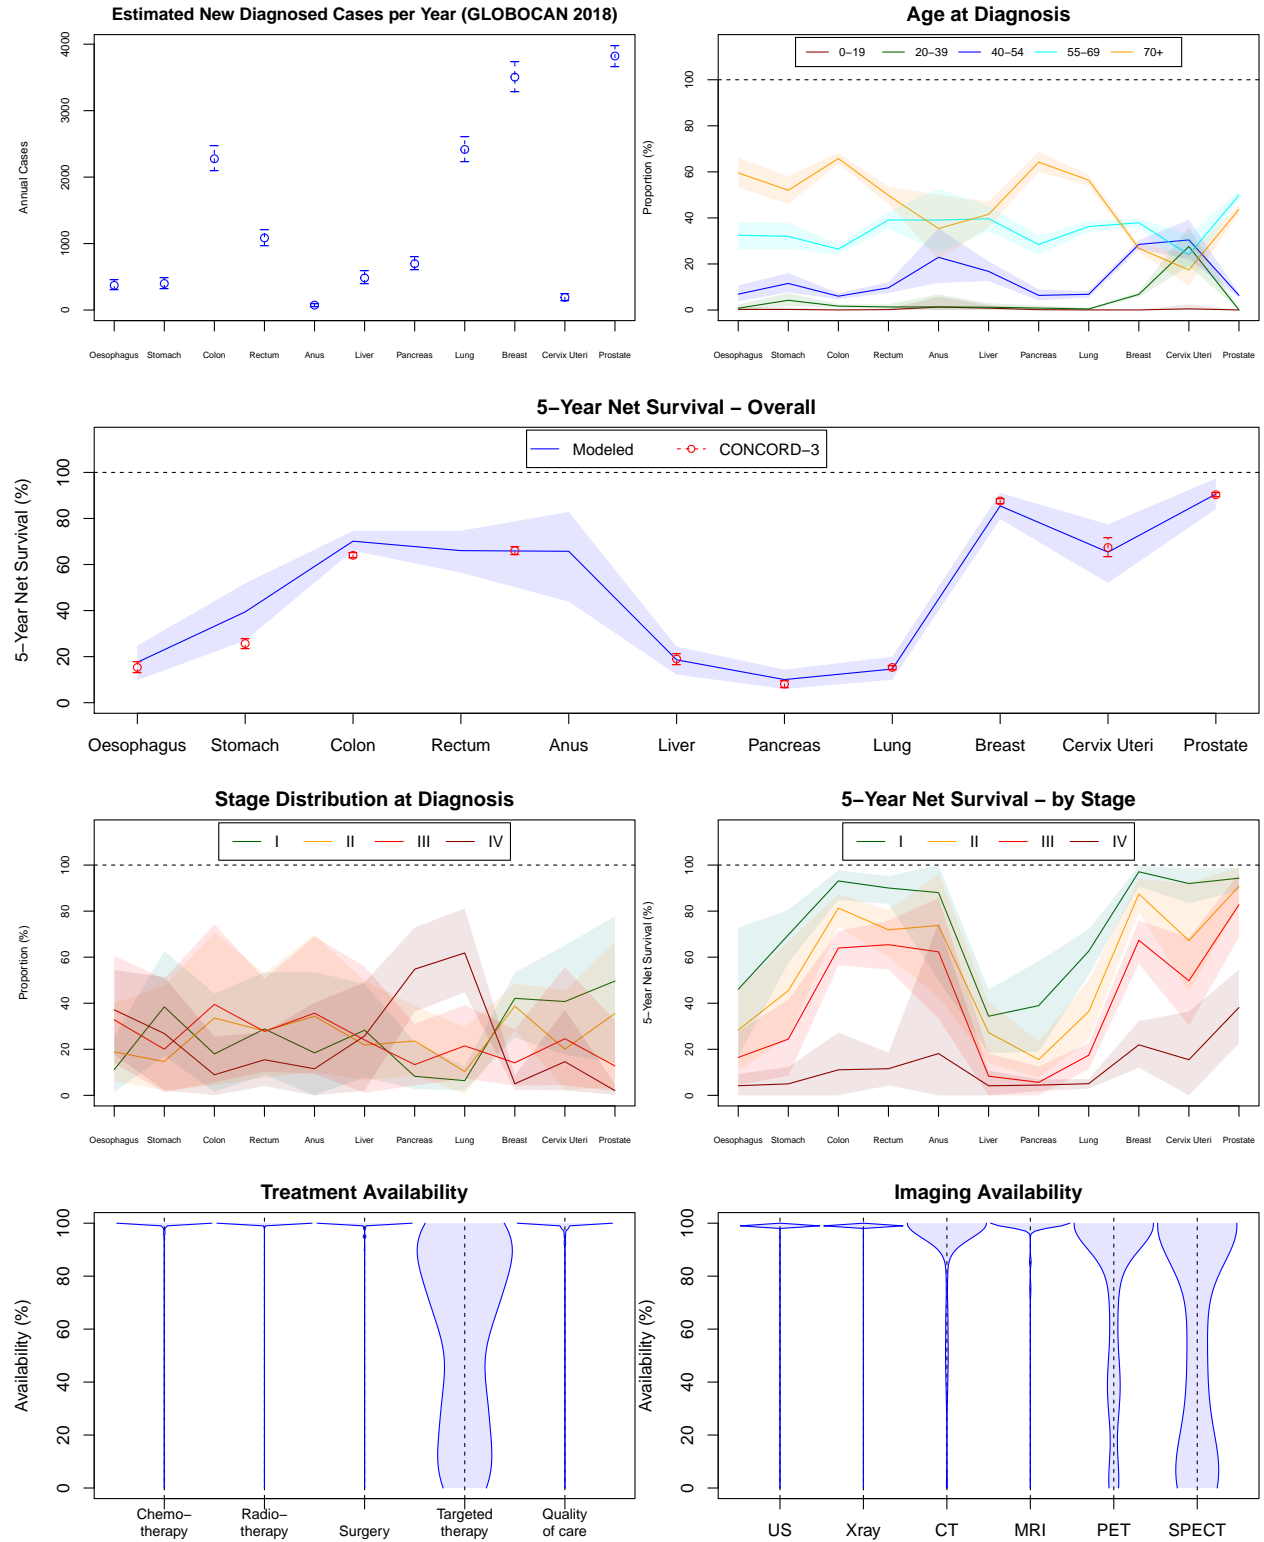

# Nicaragua

| ISO Code | Region          | Area                            | Income Group        |
|----------|-----------------|---------------------------------|---------------------|
| NIC      | Central America | Latin America and the Caribbean | Lower middle income |

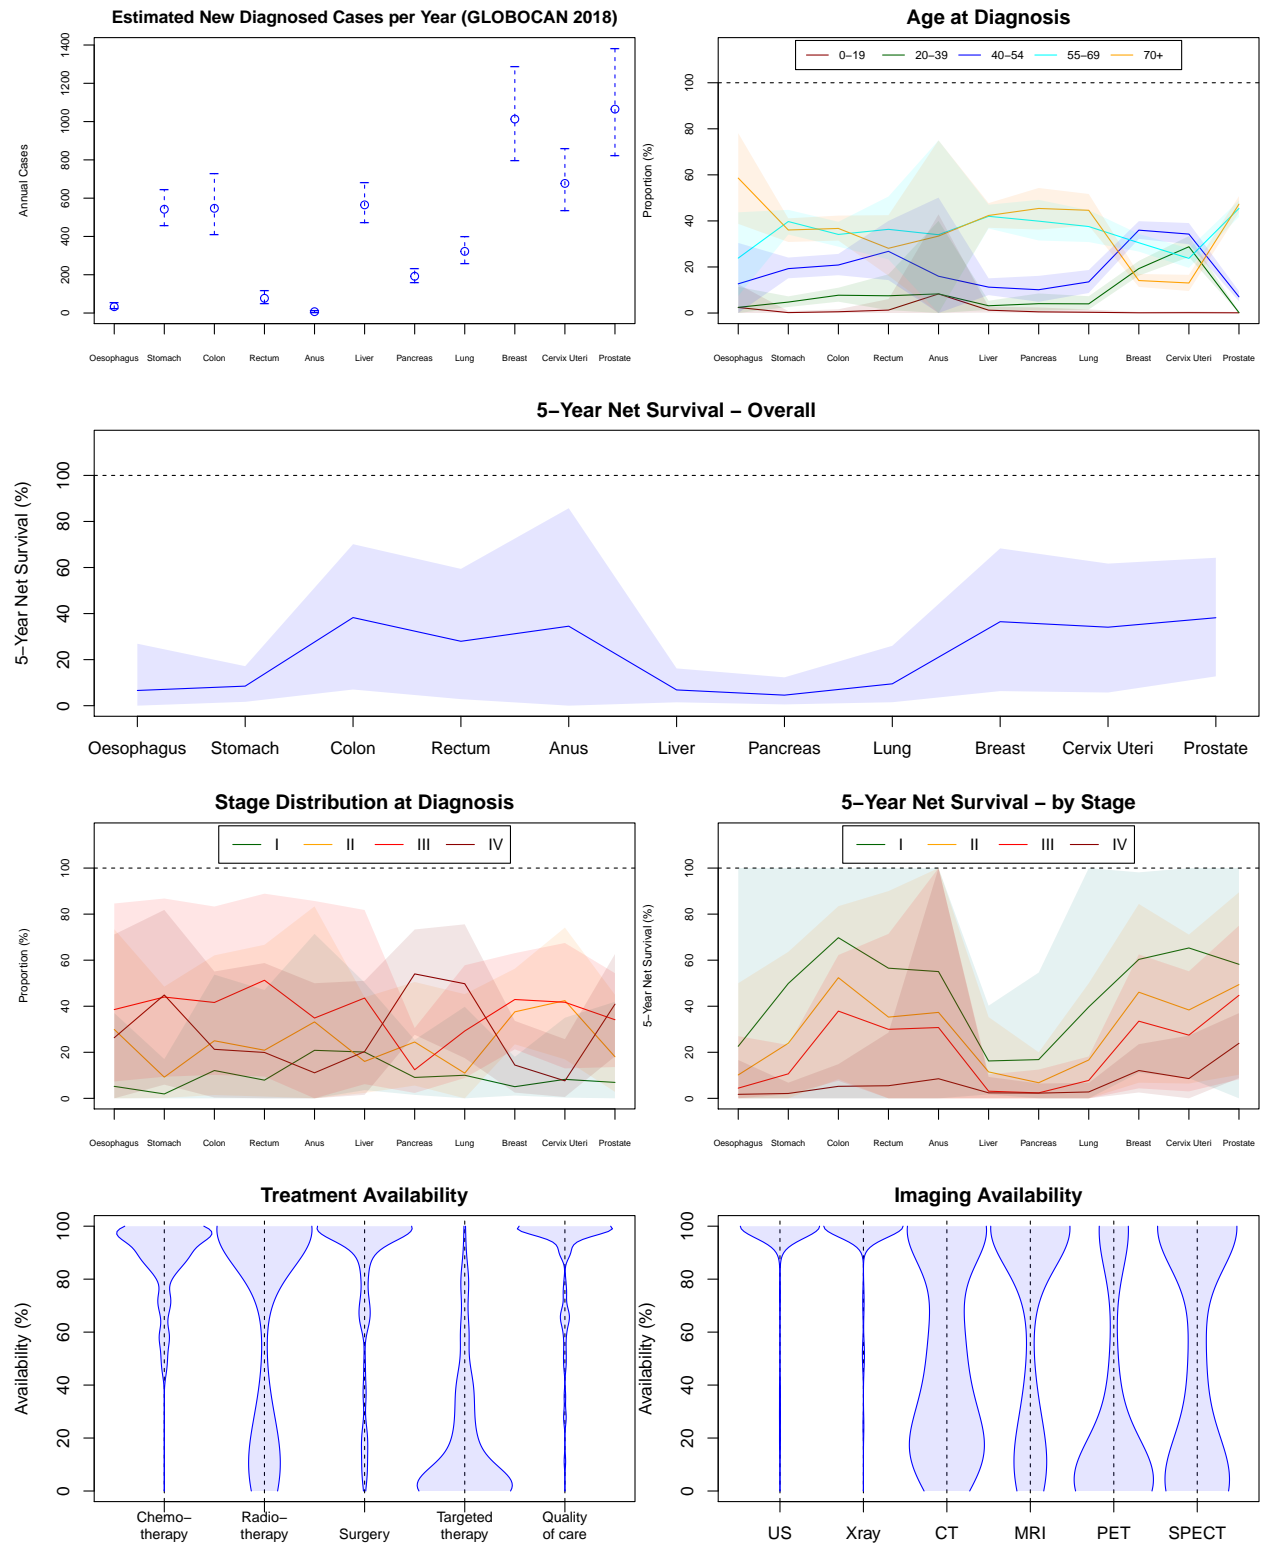

# Niger

| ISO Code | Region         | Area   | Income Group |
|----------|----------------|--------|--------------|
| NER      | Western Africa | Africa | Low income   |

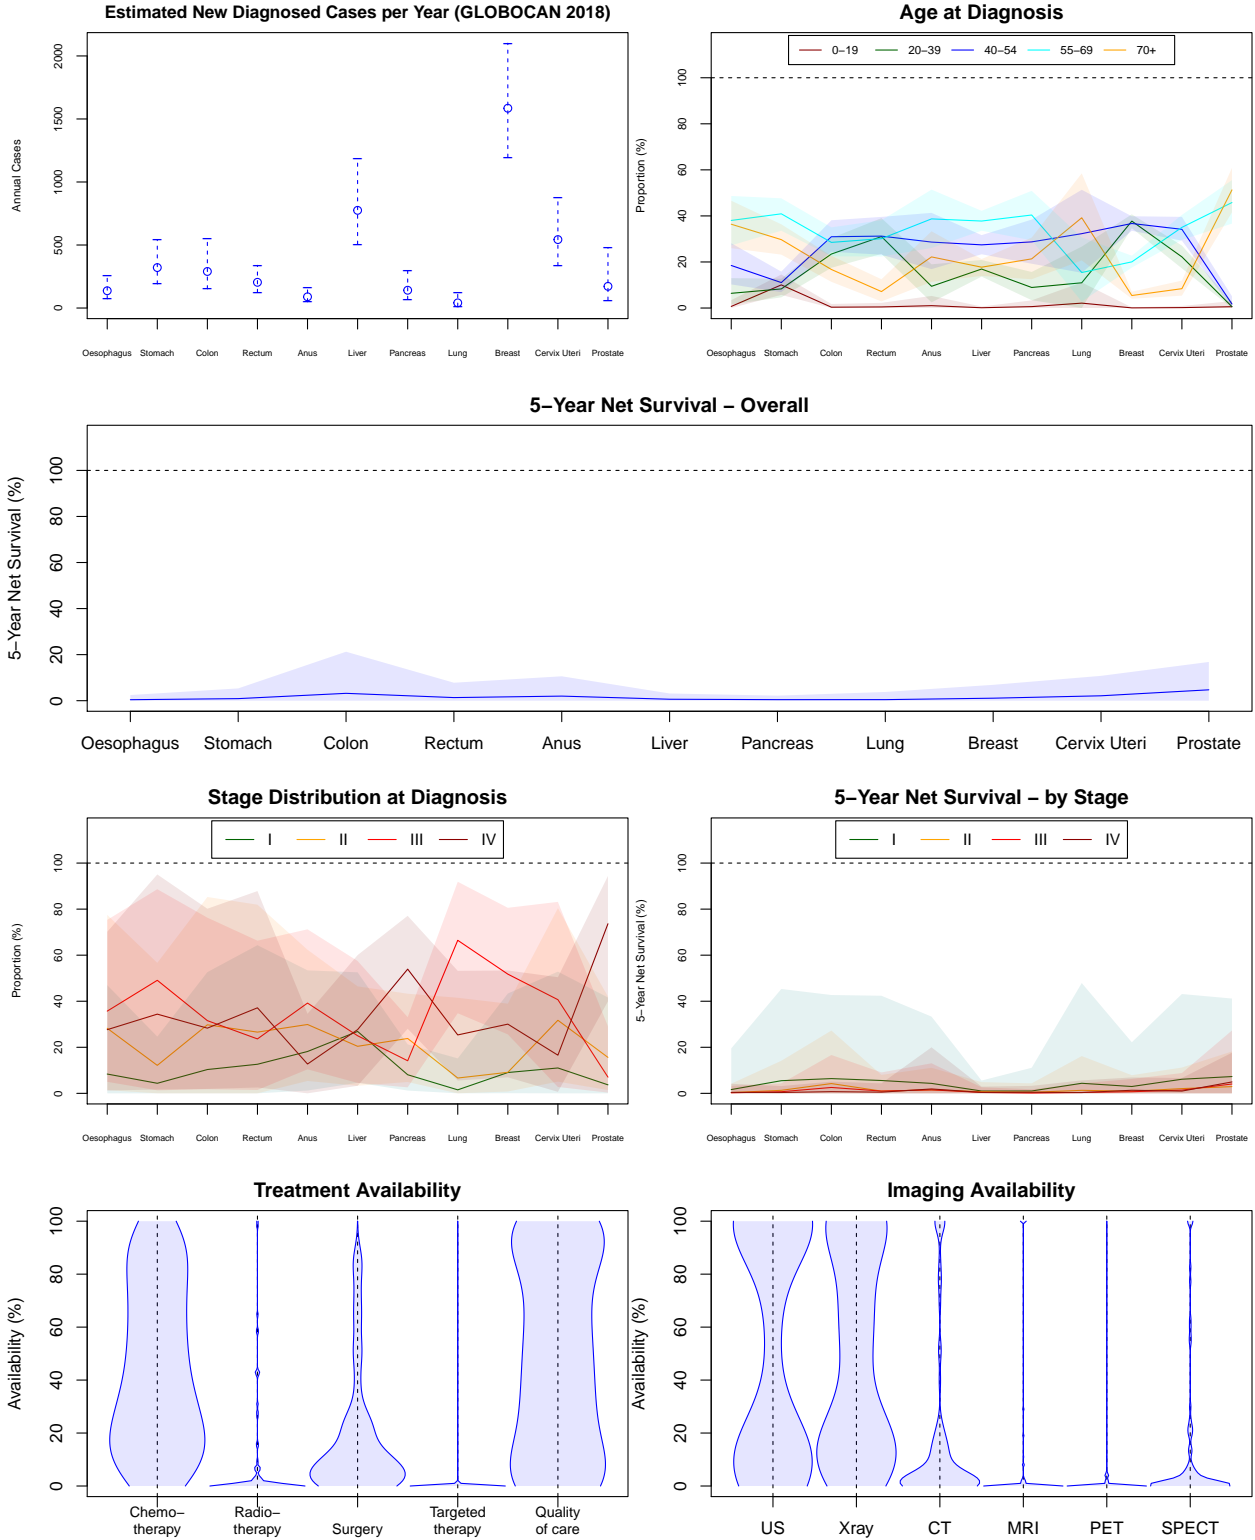

# Nigeria

| ISO Code | Region         | Area   | Income Group        |
|----------|----------------|--------|---------------------|
| NGA      | Western Africa | Africa | Lower middle income |

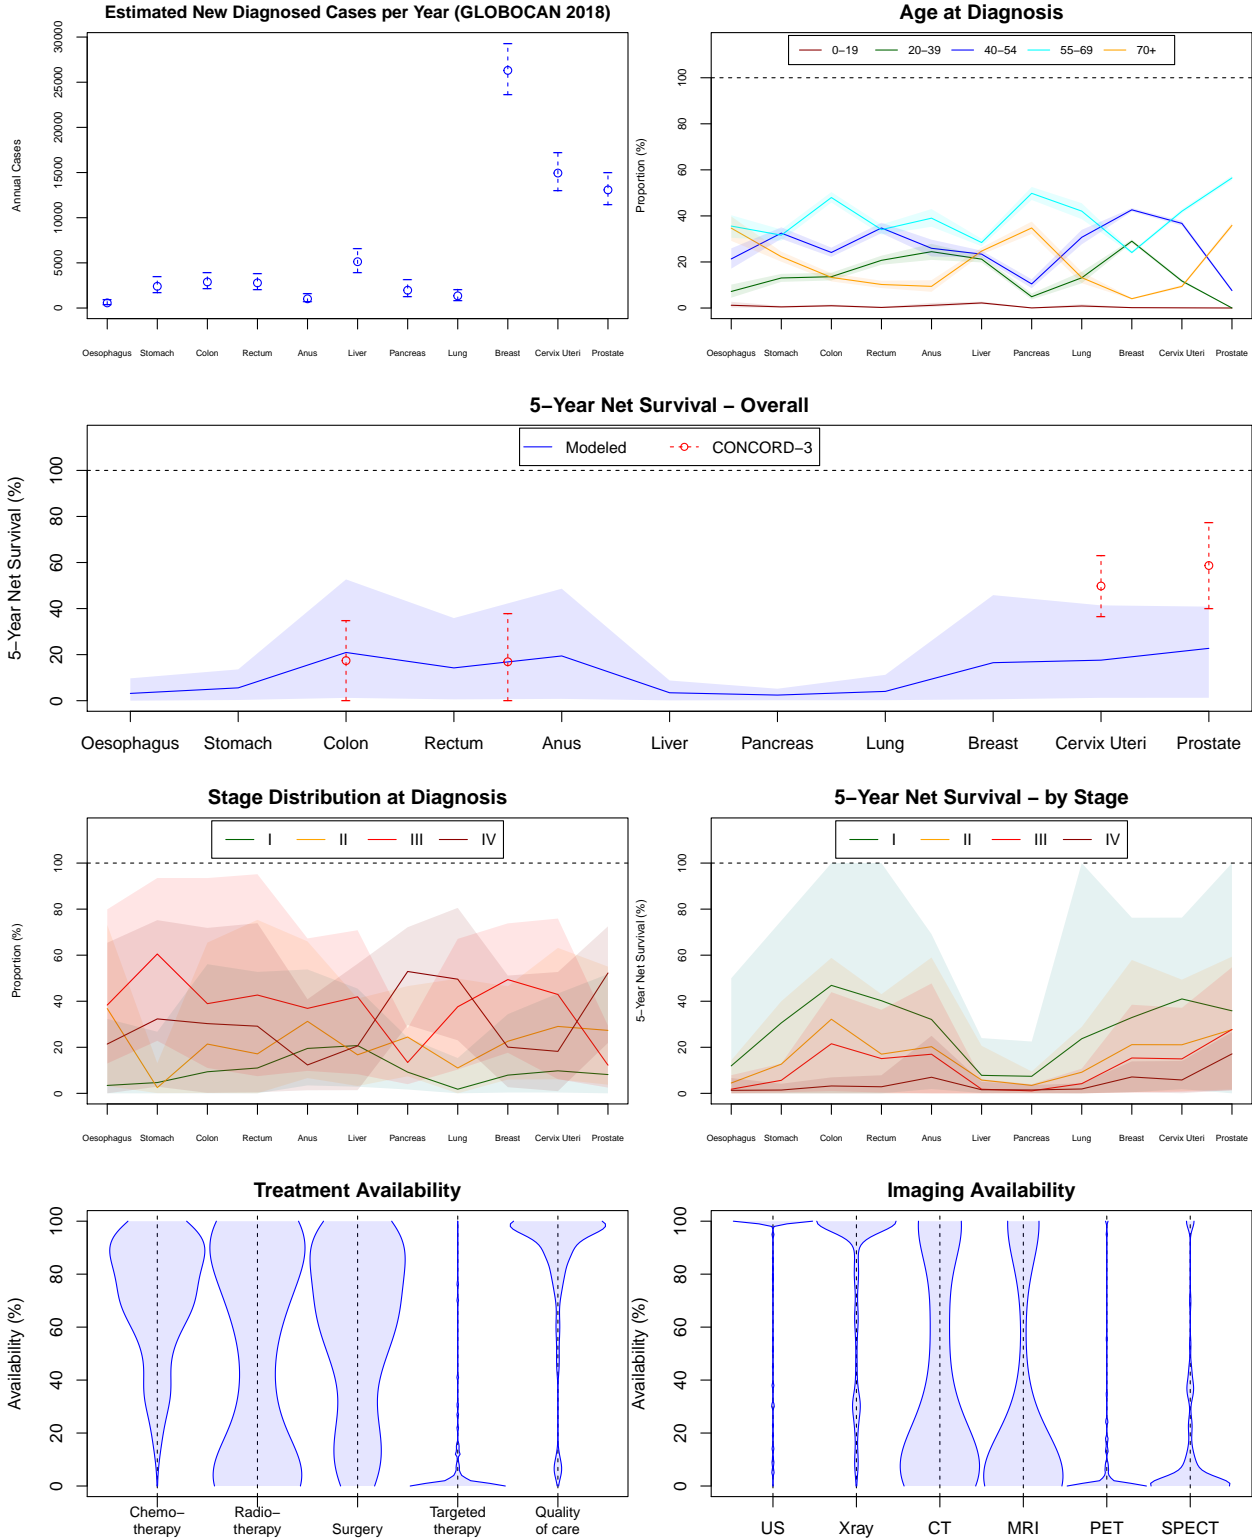



# North Macedonia

| ISO Code | Region          | Area   | Income Group        |
|----------|-----------------|--------|---------------------|
| MKD      | Southern Europe | Europe | Upper middle income |

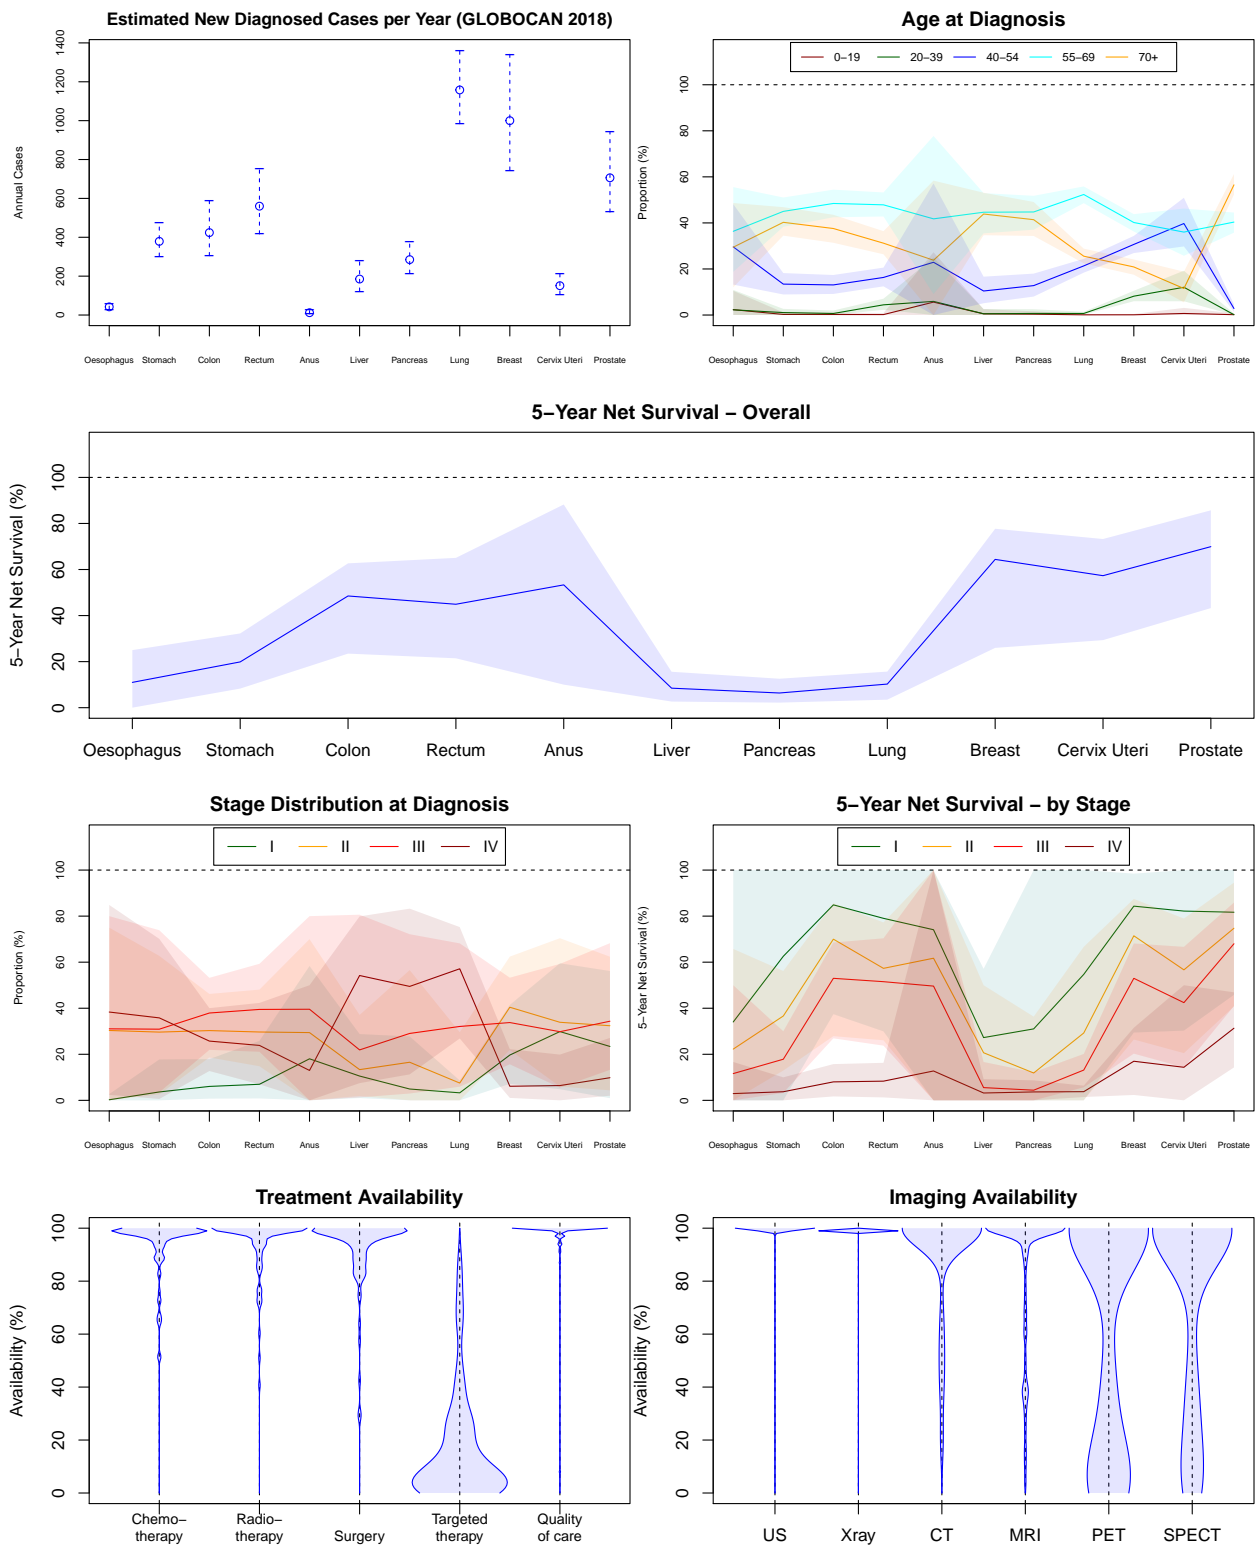

# Norway

| ISO Code | Region          | Area   | Income Group |
|----------|-----------------|--------|--------------|
| NOR      | Northern Europe | Europe | High income  |

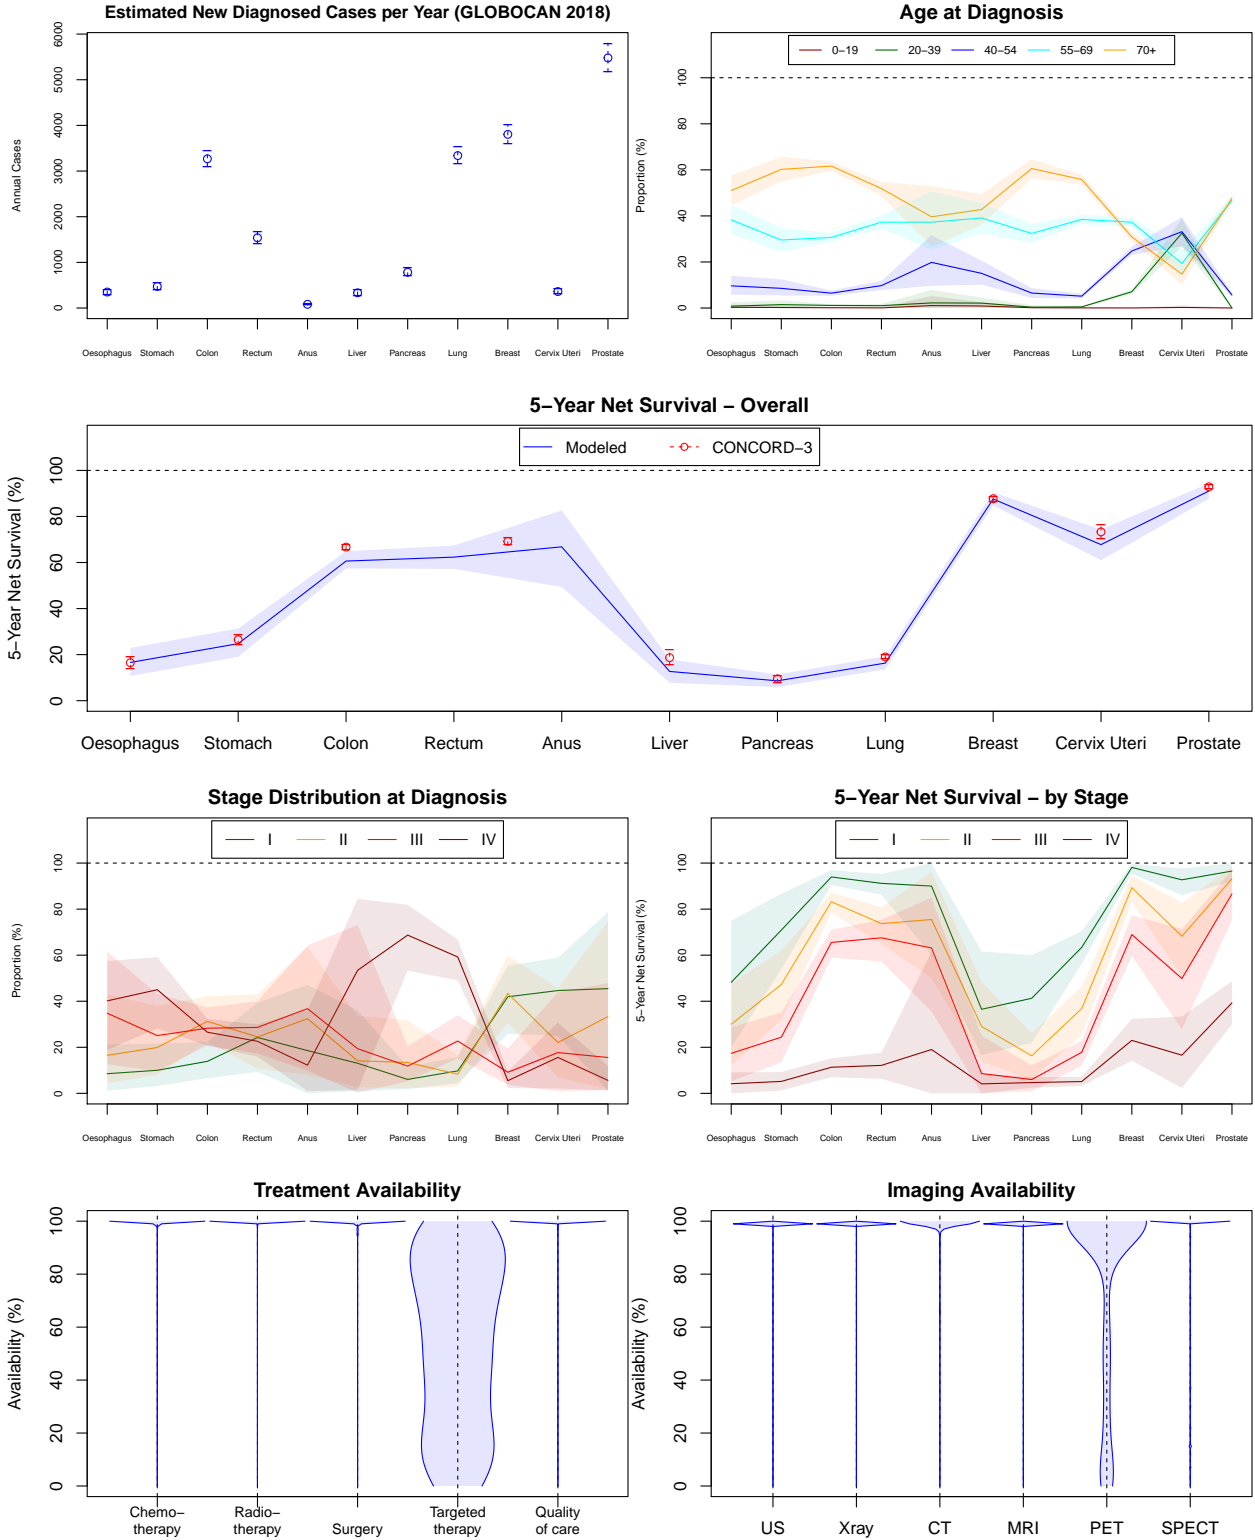

# Oman

| ISO Code | Region       | Area | Income Group |
|----------|--------------|------|--------------|
| OMN      | Western Asia | Asia | High income  |

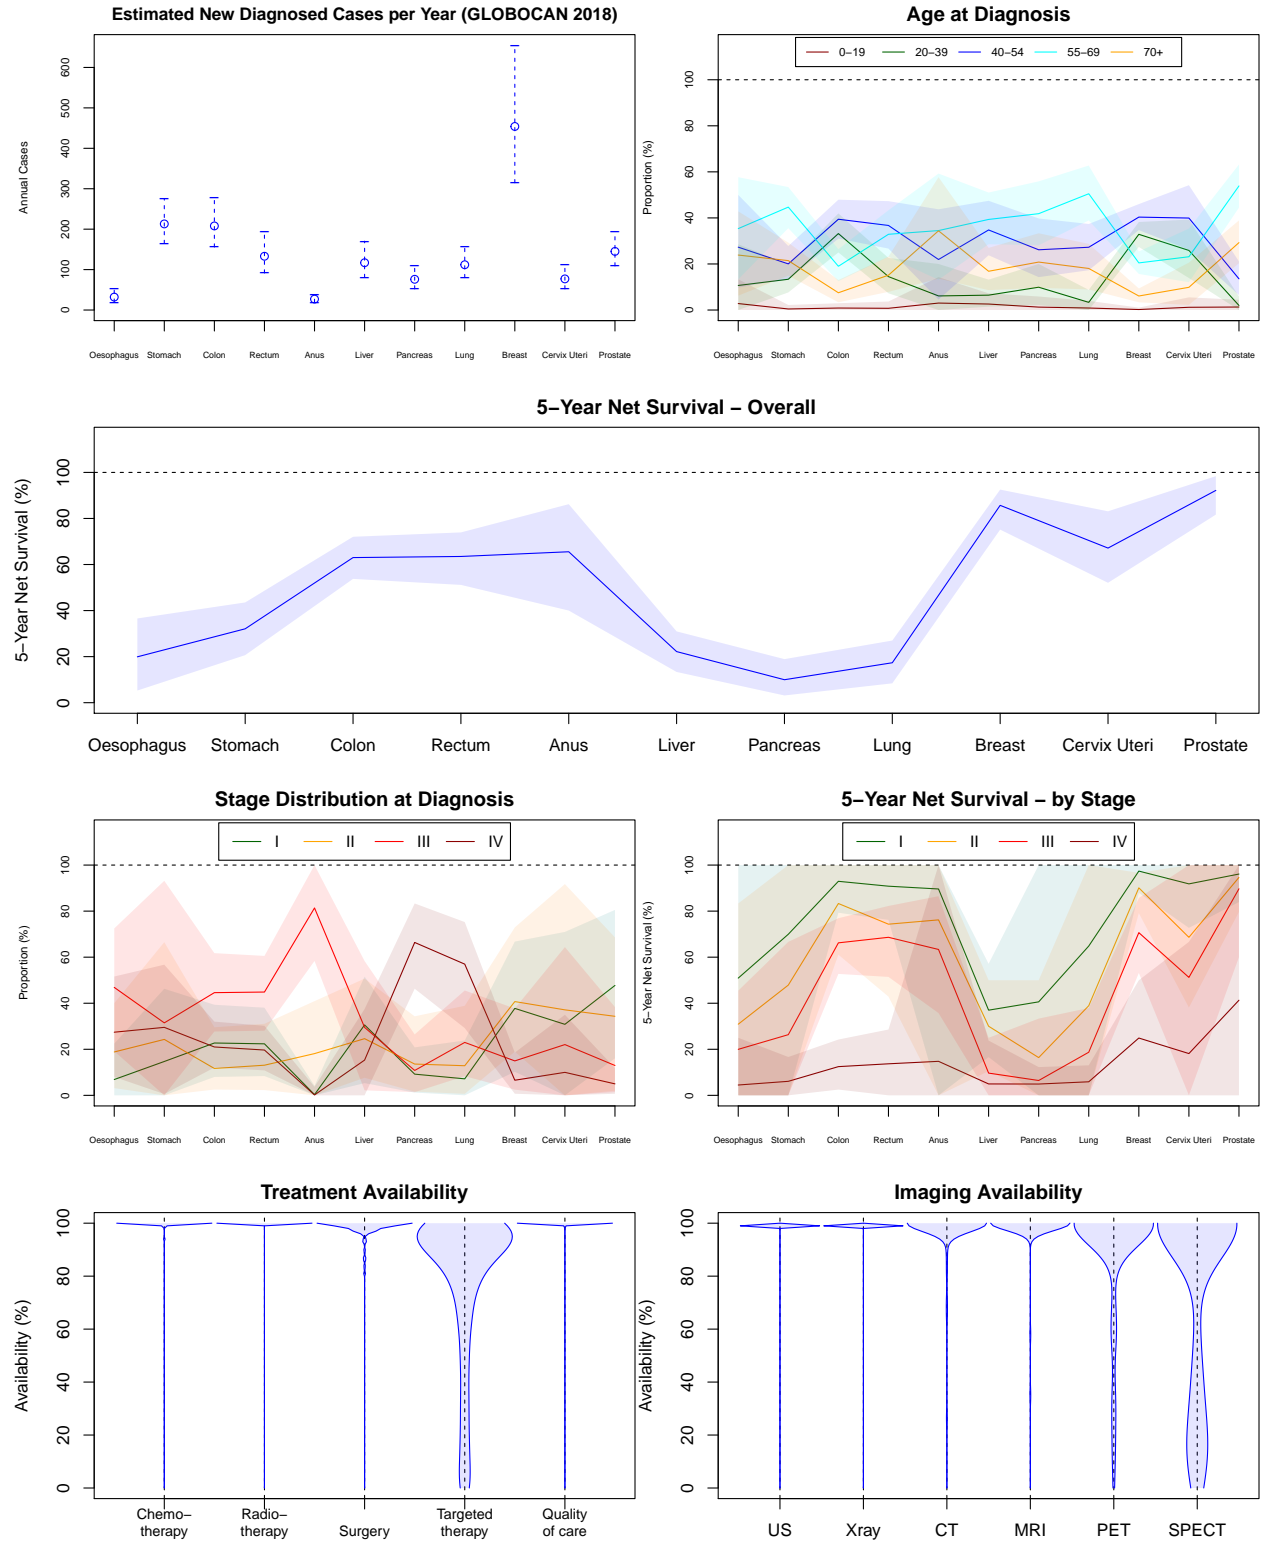

# Pakistan

| ISO Code | Region        | Area | Income Group        |
|----------|---------------|------|---------------------|
| PAK      | Southern Asia | Asia | Lower middle income |

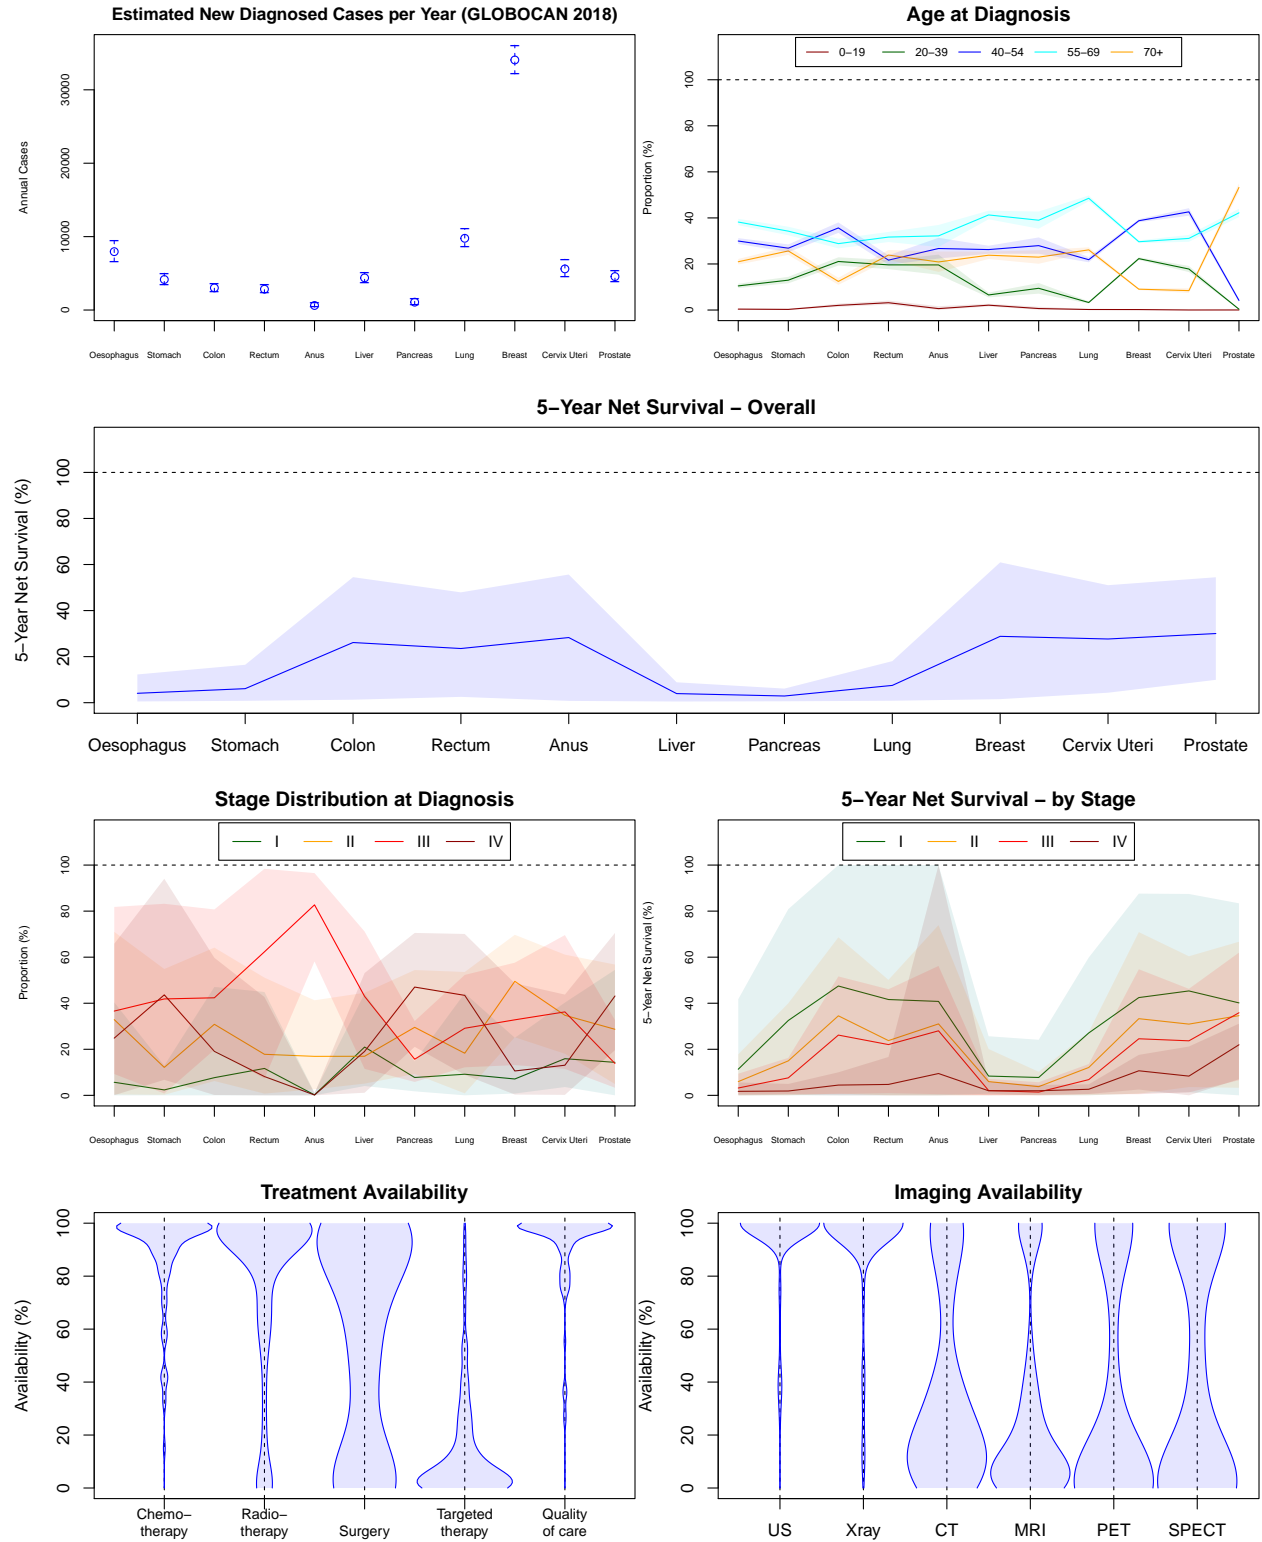

# Palau

| ISO Code | Region     | Area    | Income Group |
|----------|------------|---------|--------------|
| PLW      | Micronesia | Oceania | High income  |

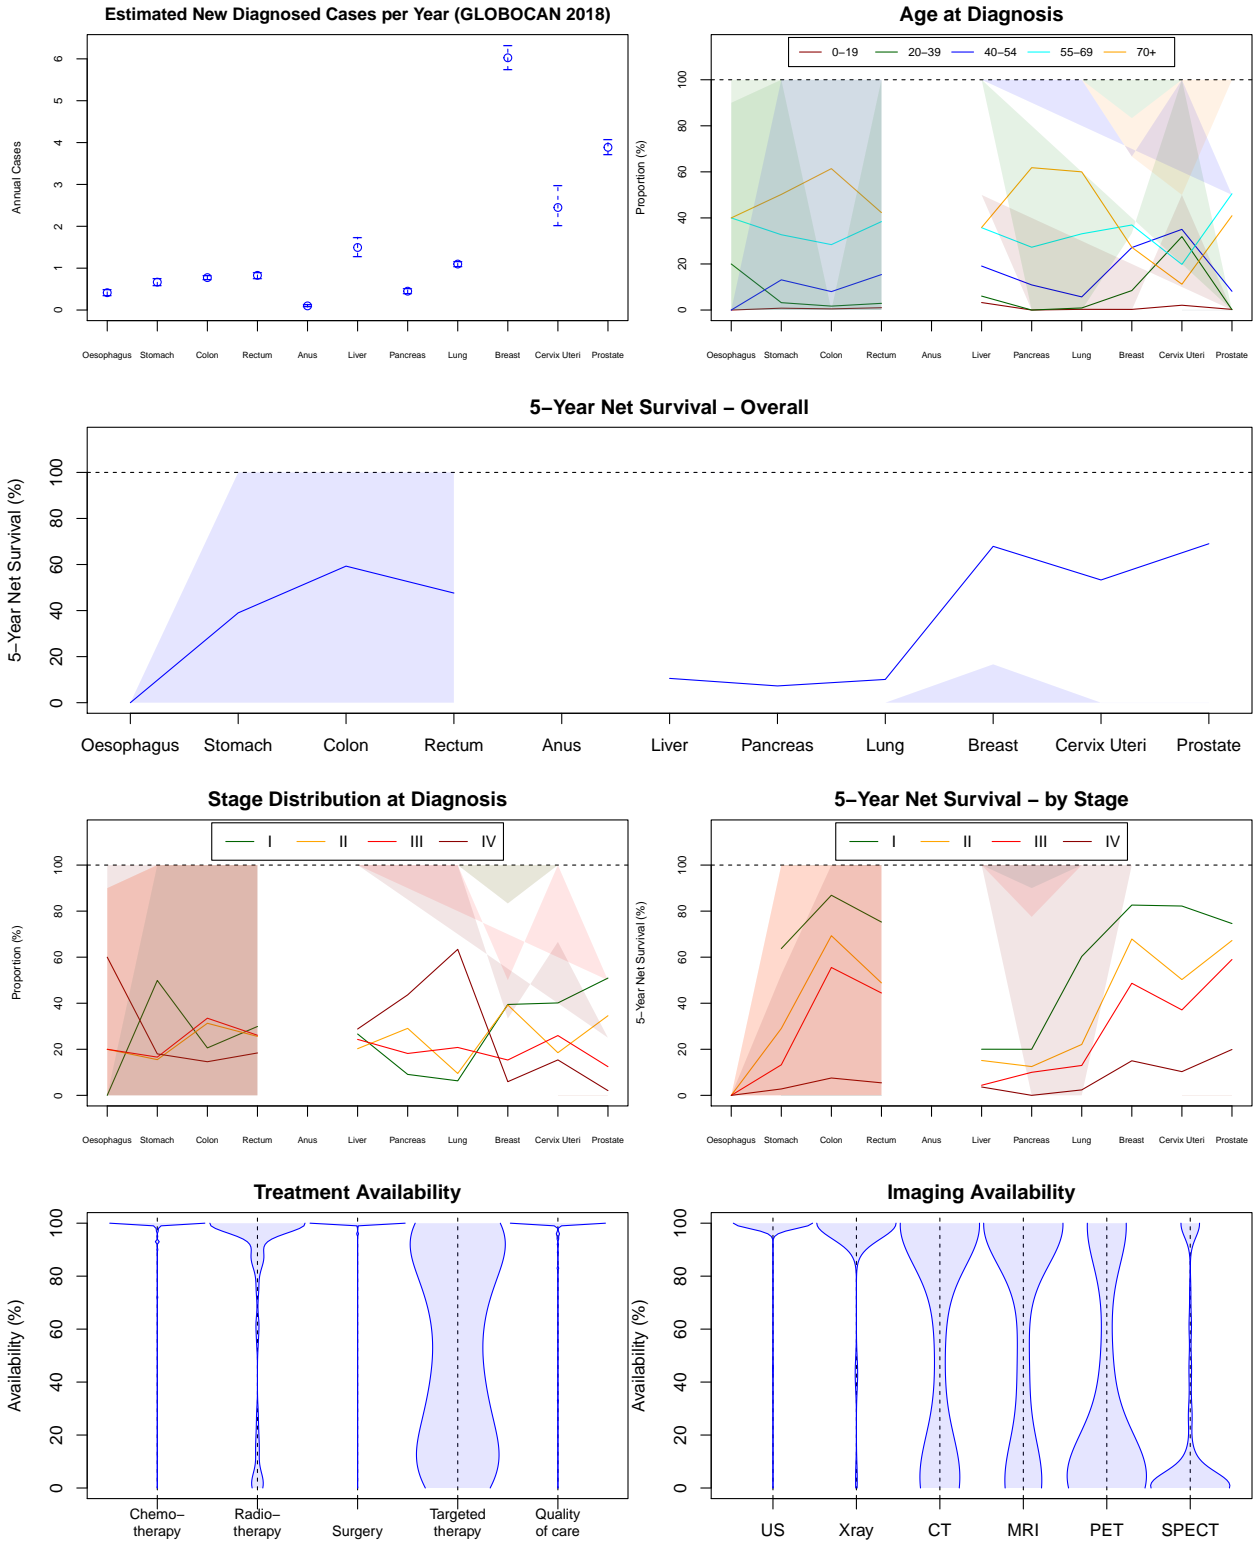

# Panama

| ISO Code | Region          | Area                            | Income Group |
|----------|-----------------|---------------------------------|--------------|
| PAN      | Central America | Latin America and the Caribbean | High income  |

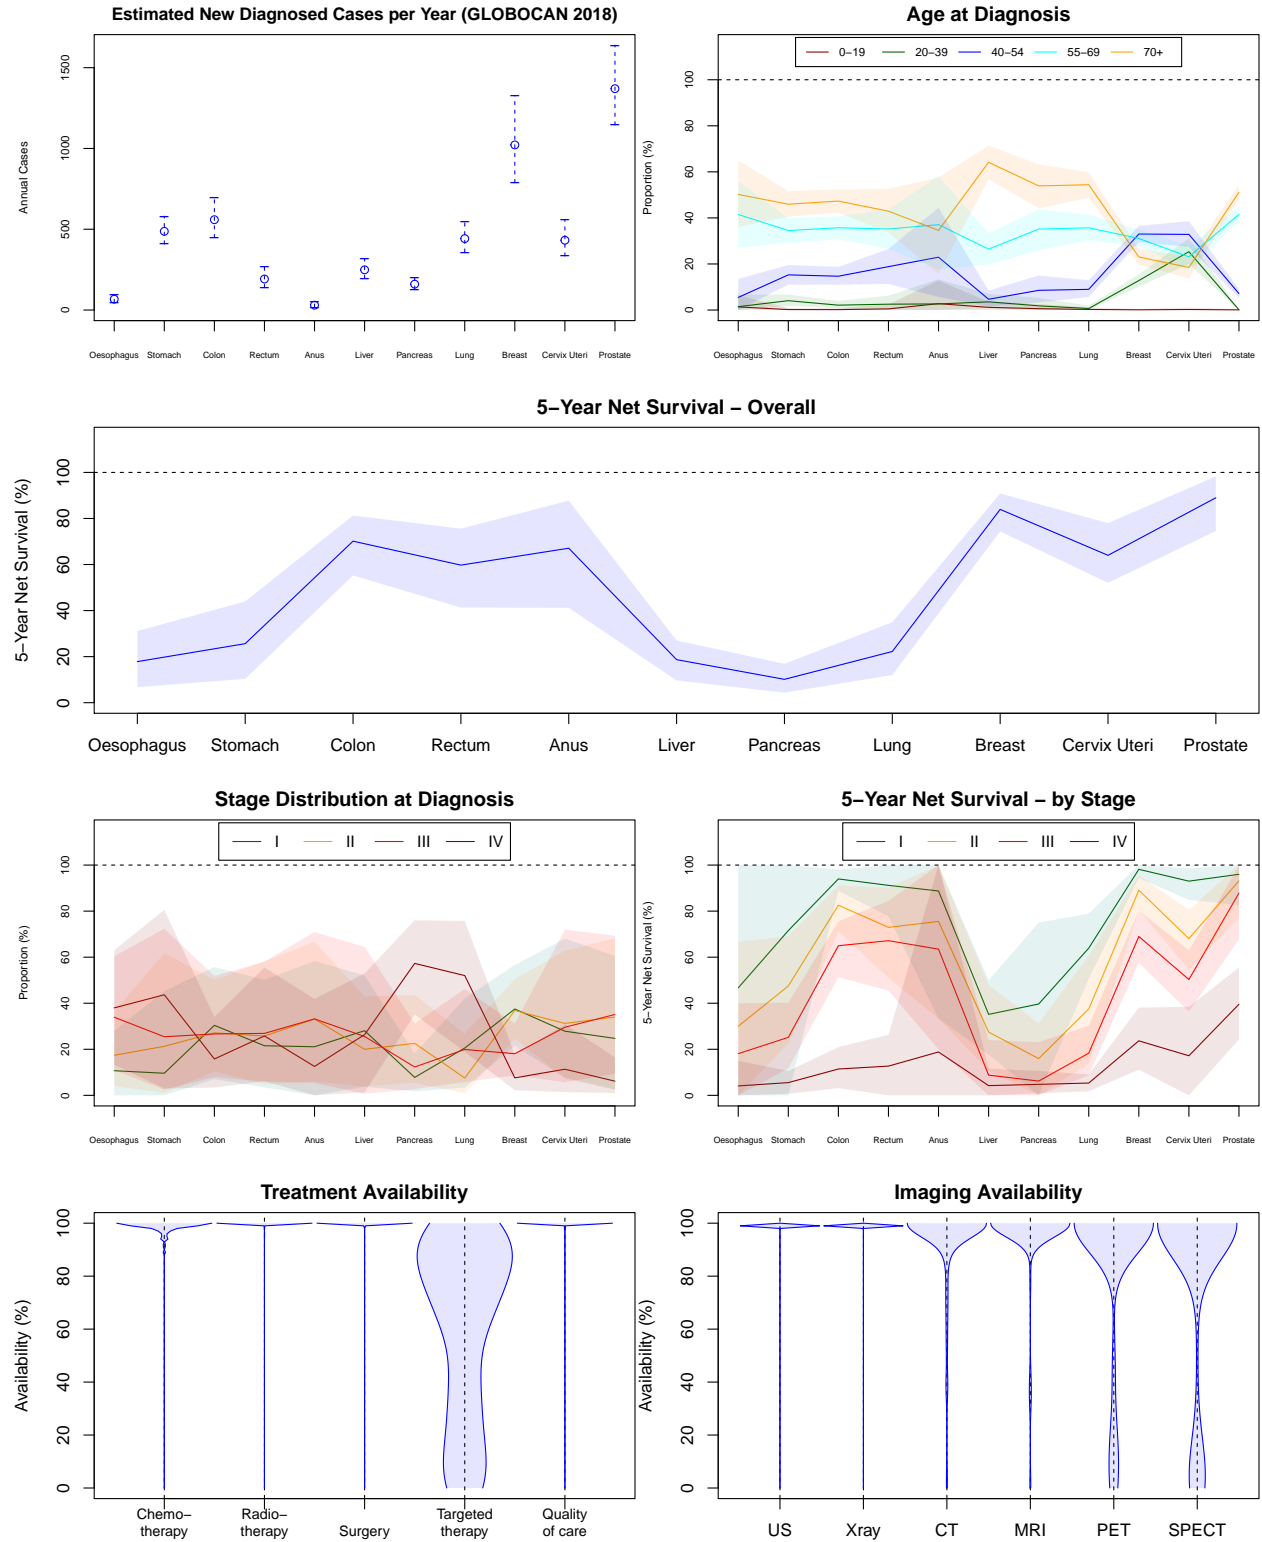

# Papua New Guinea

| ISO Code | Region    | Area    | Income Group        |
|----------|-----------|---------|---------------------|
| PNG      | Melanesia | Oceania | Lower middle income |

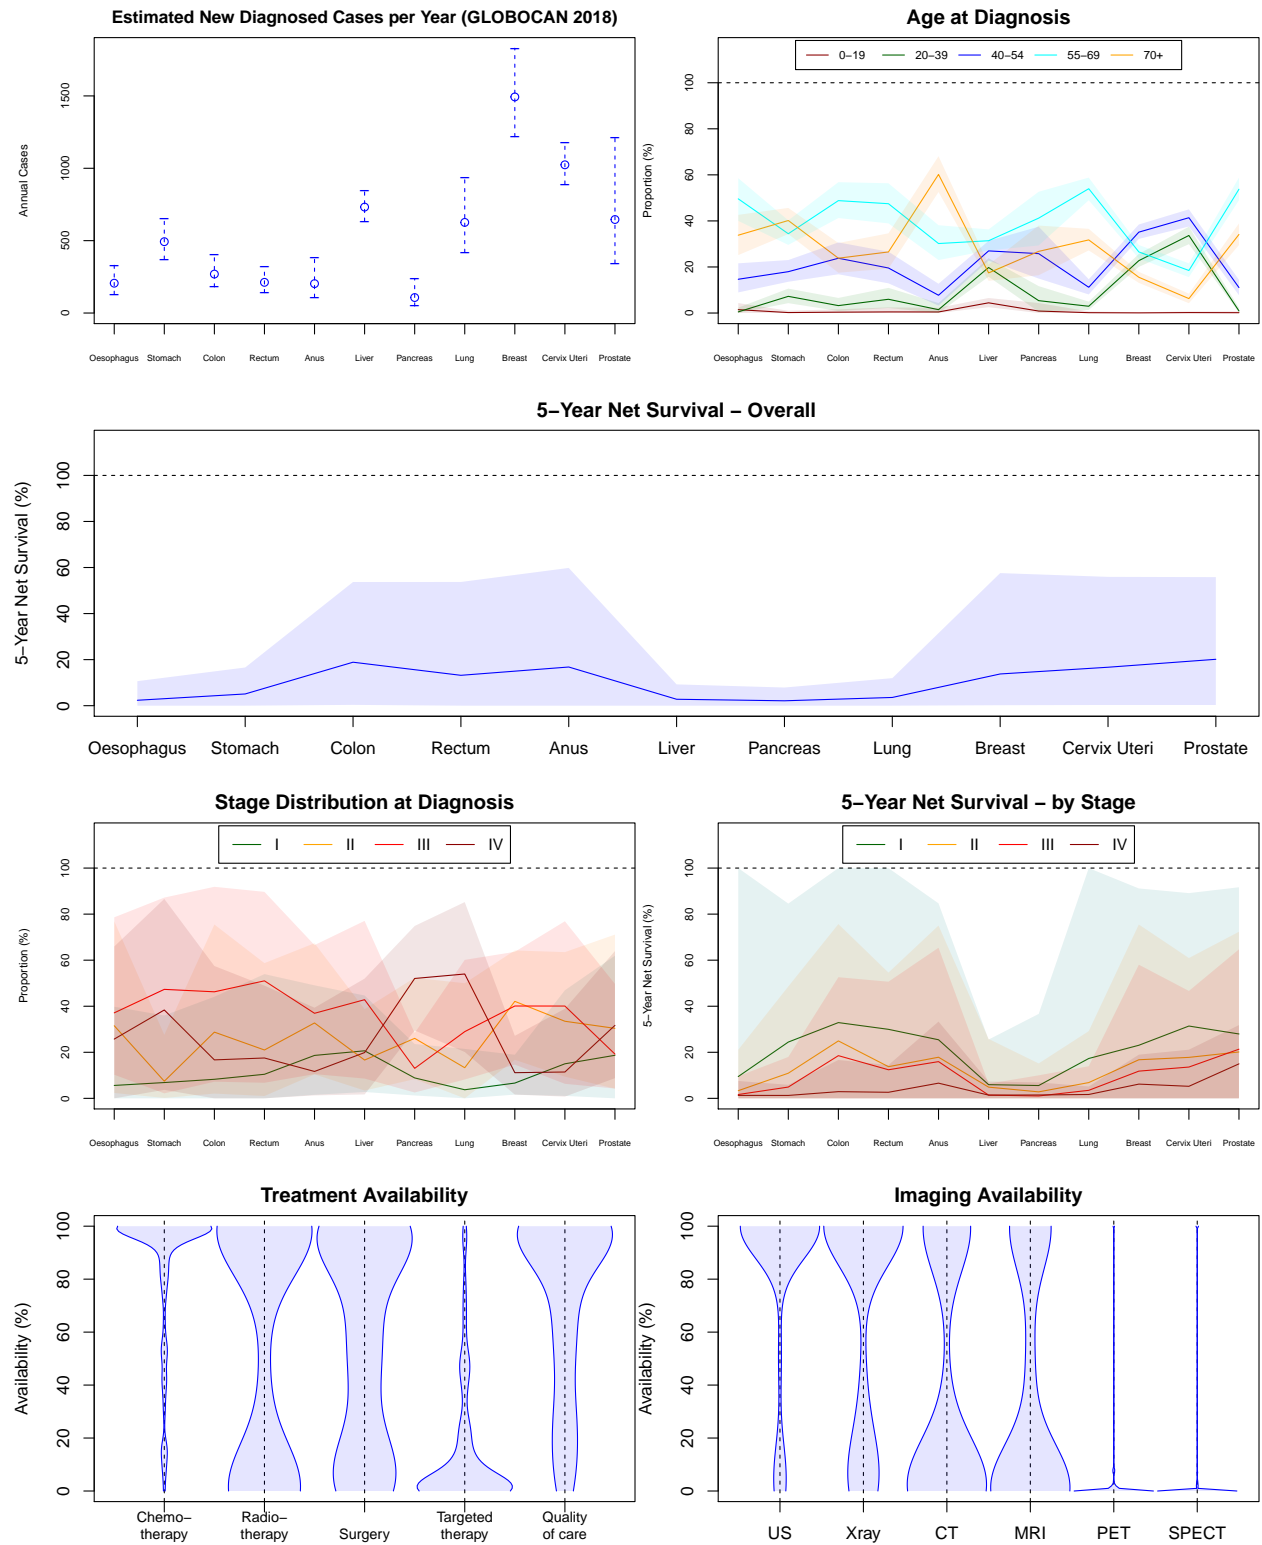

# Paraguay

| ISO Code | Region        | Area                            | Income Group        |
|----------|---------------|---------------------------------|---------------------|
| PRY      | South America | Latin America and the Caribbean | Upper middle income |

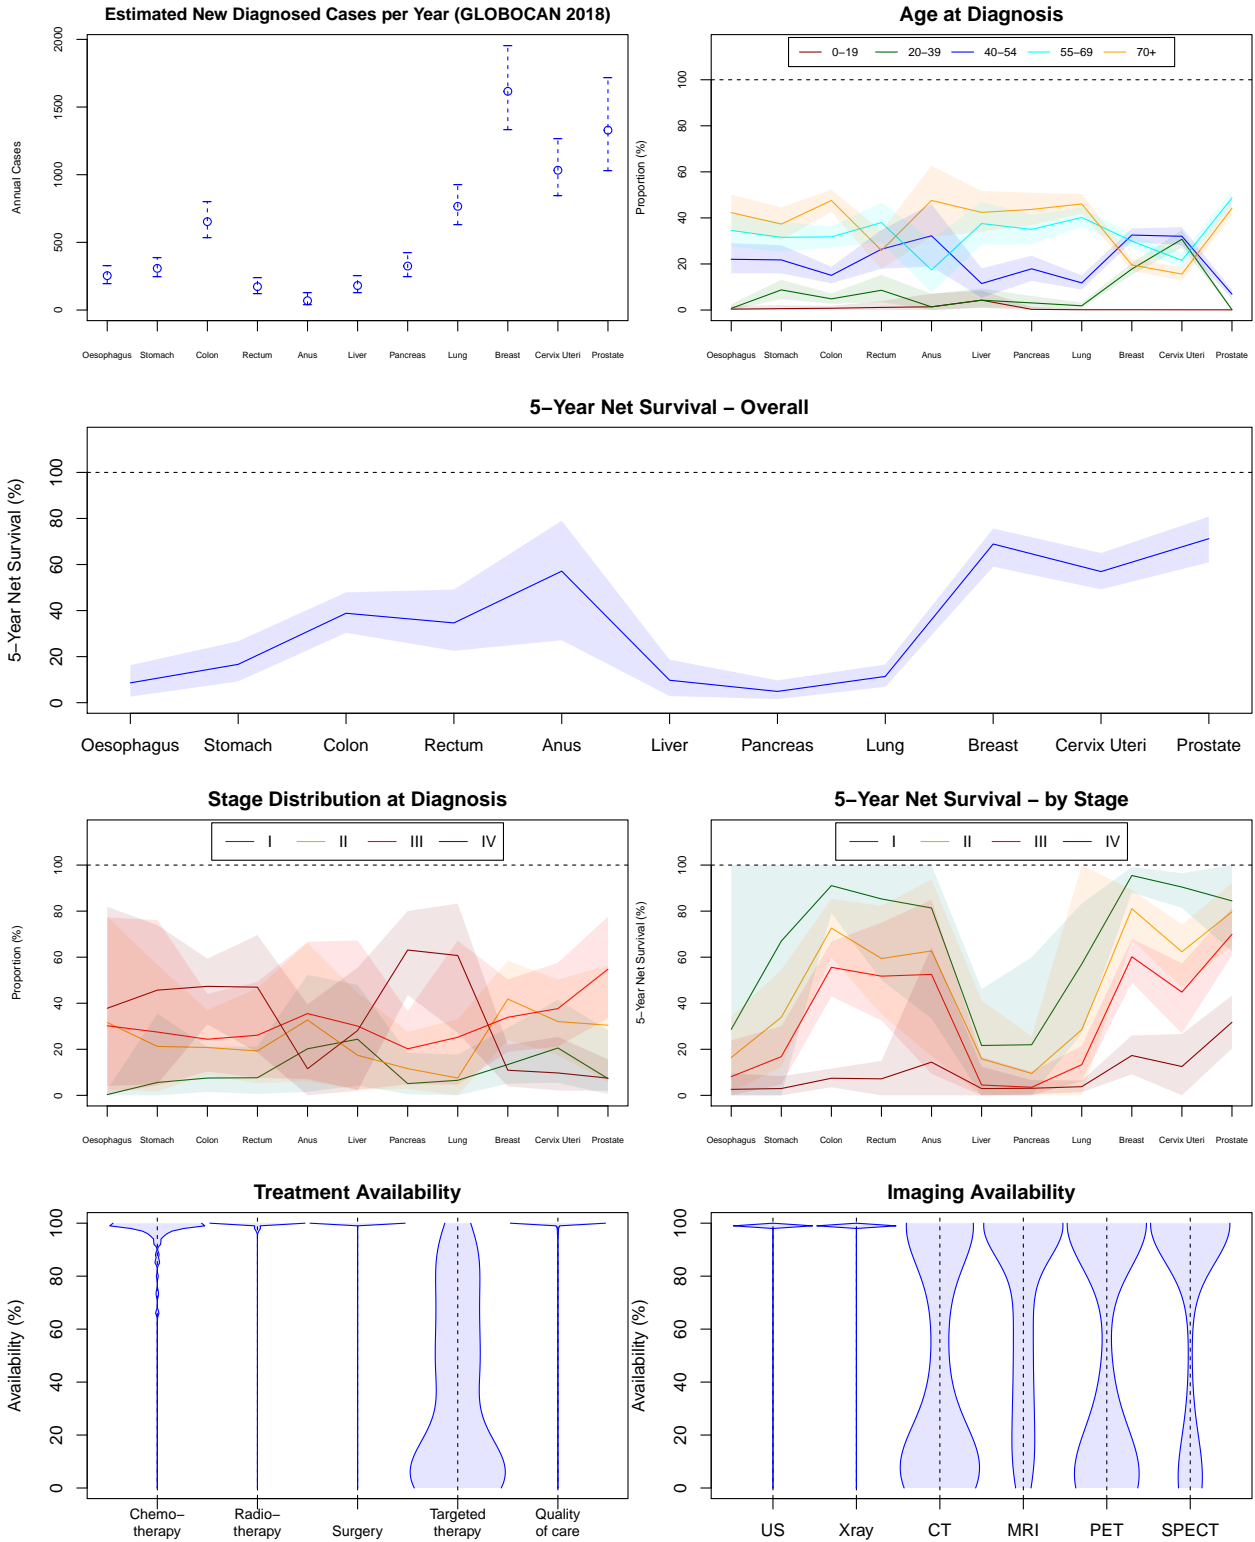



# Peru

| ISO Code | Region        | Area                            | Income Group        |
|----------|---------------|---------------------------------|---------------------|
| PER      | South America | Latin America and the Caribbean | Upper middle income |

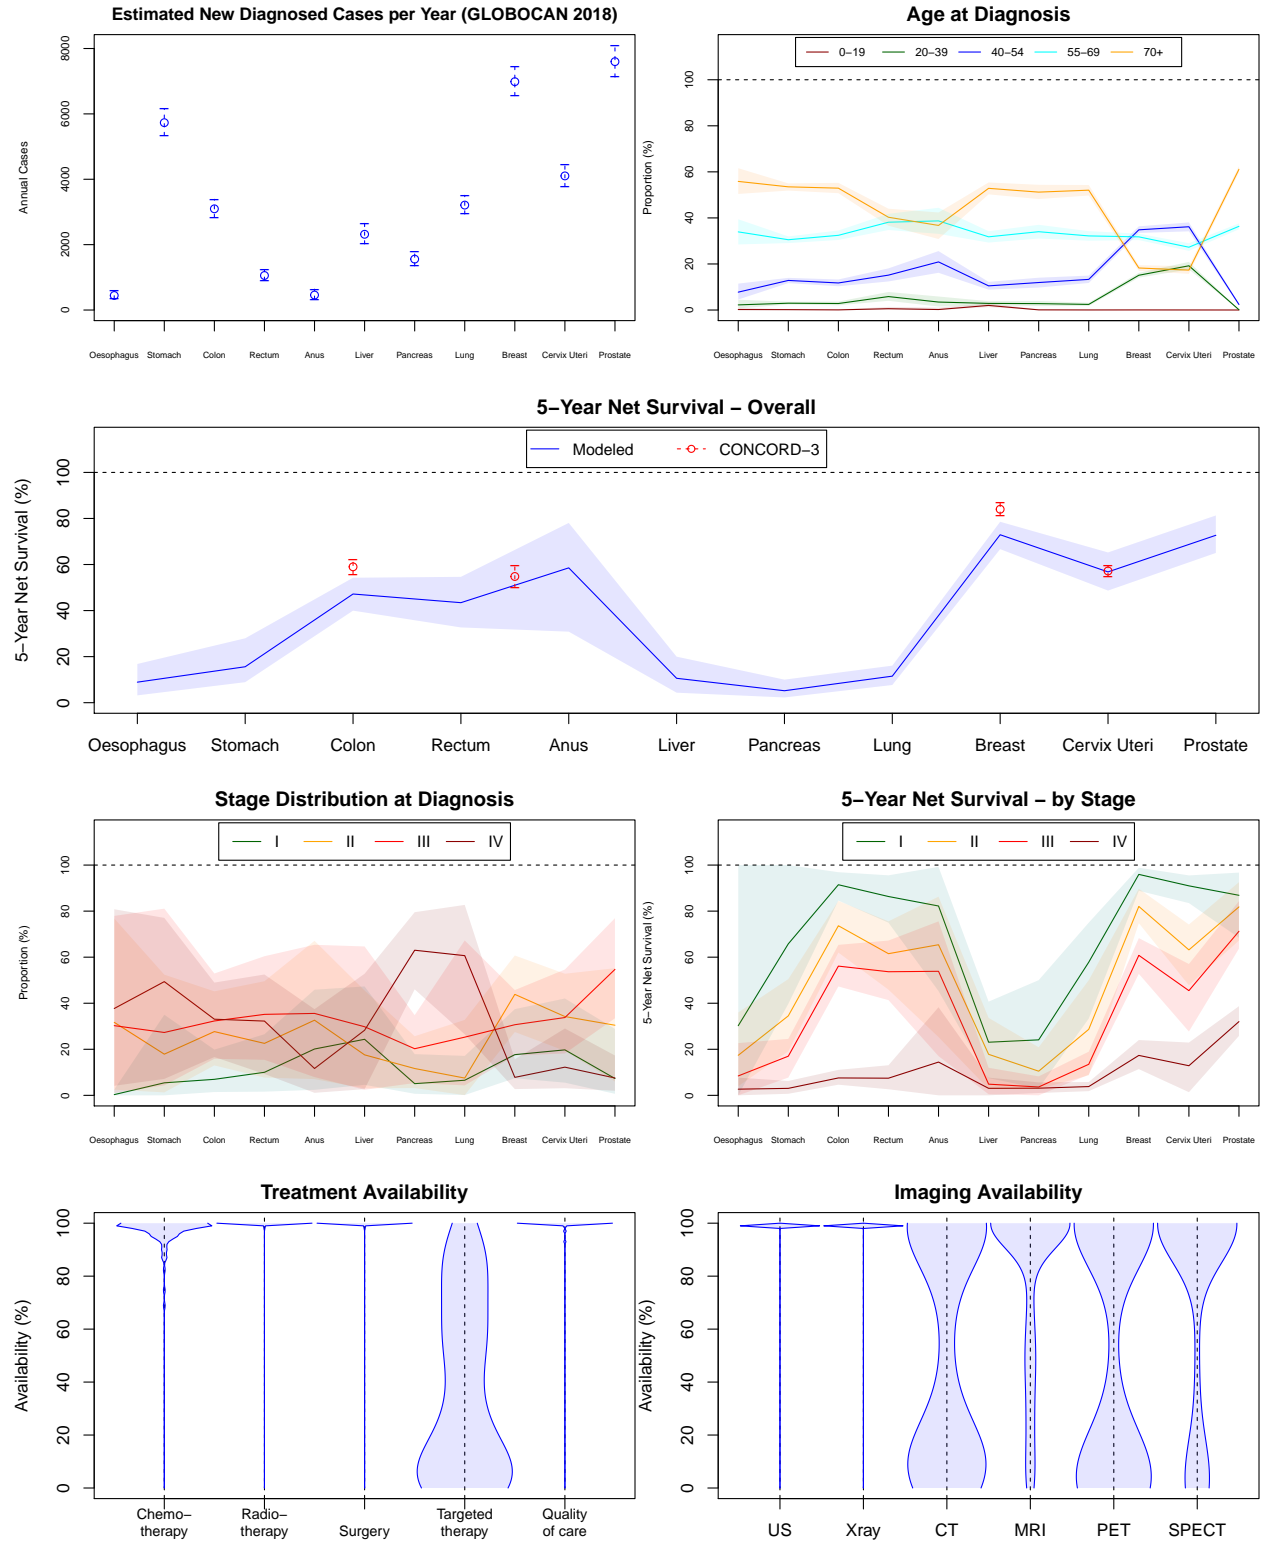

# Philippines

| ISO Code | Region             | Area | Income Group        |
|----------|--------------------|------|---------------------|
| PHL      | South-Eastern Asia | Asia | Lower middle income |

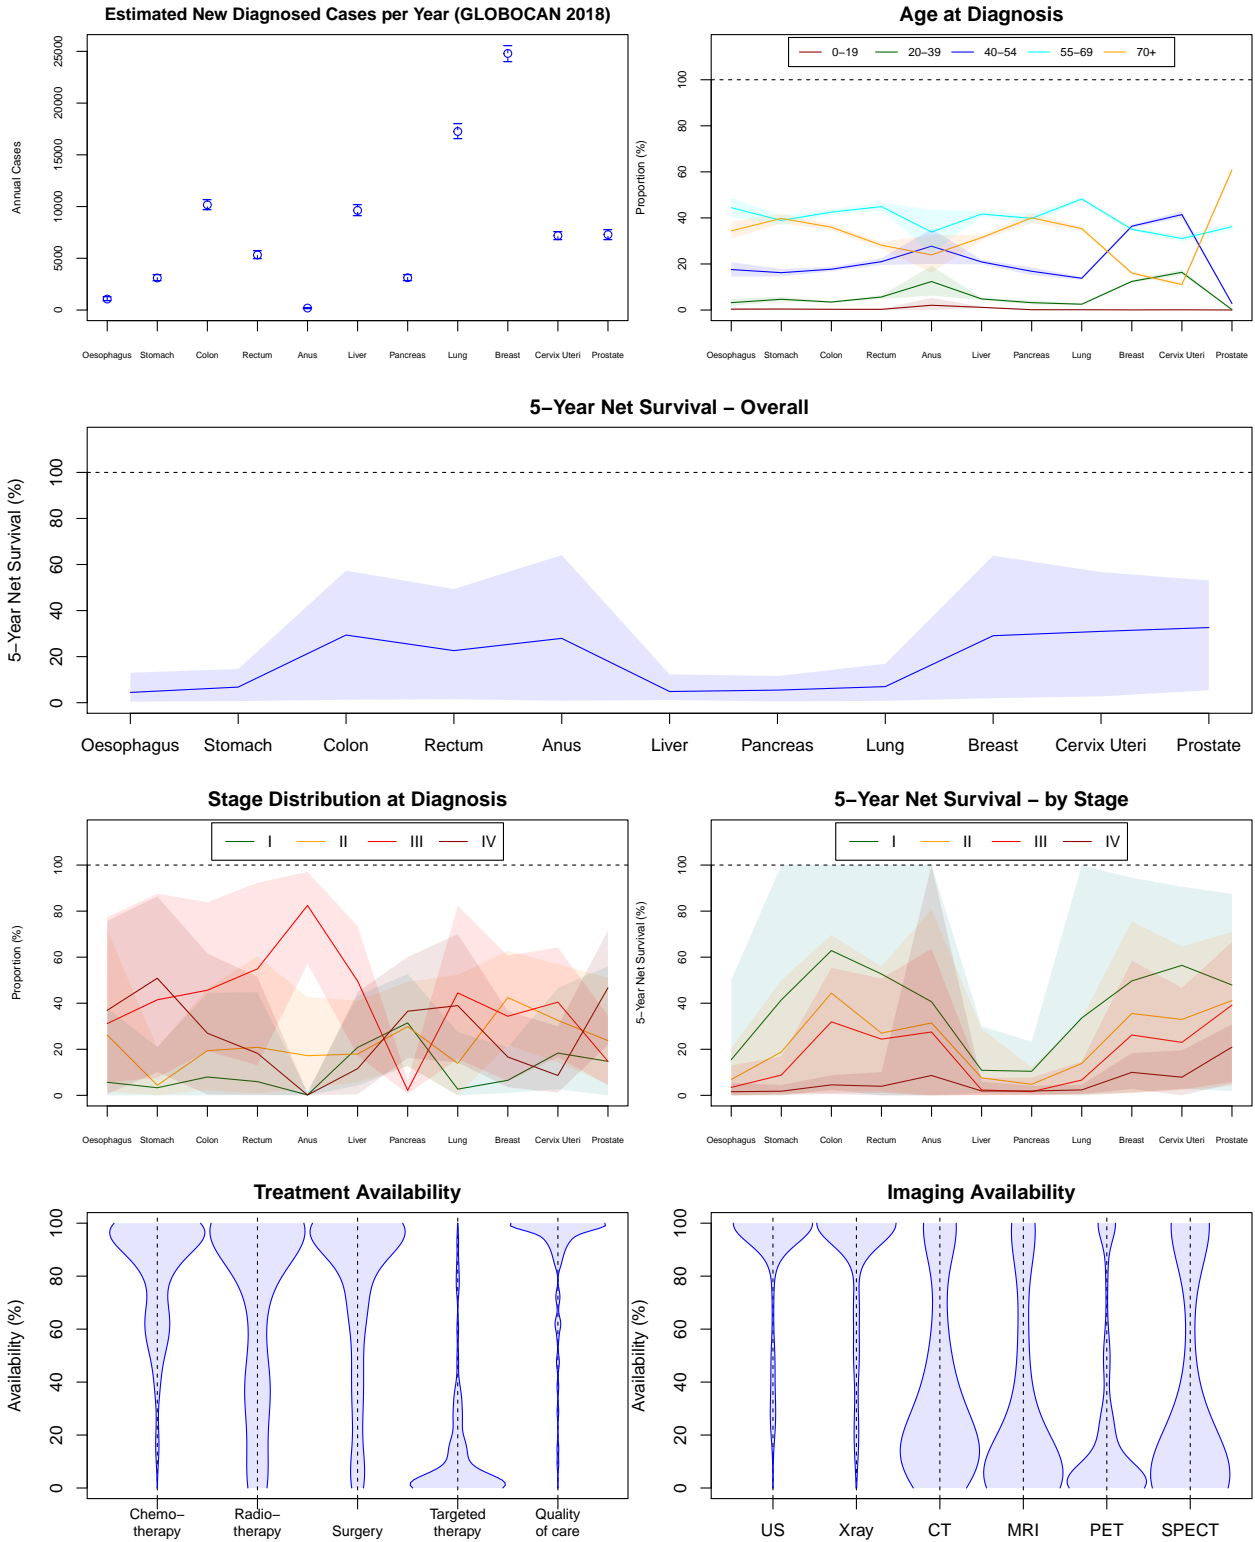

# Poland

| ISO Code | Region         | Area   | Income Group |
|----------|----------------|--------|--------------|
| POL      | Eastern Europe | Europe | High income  |

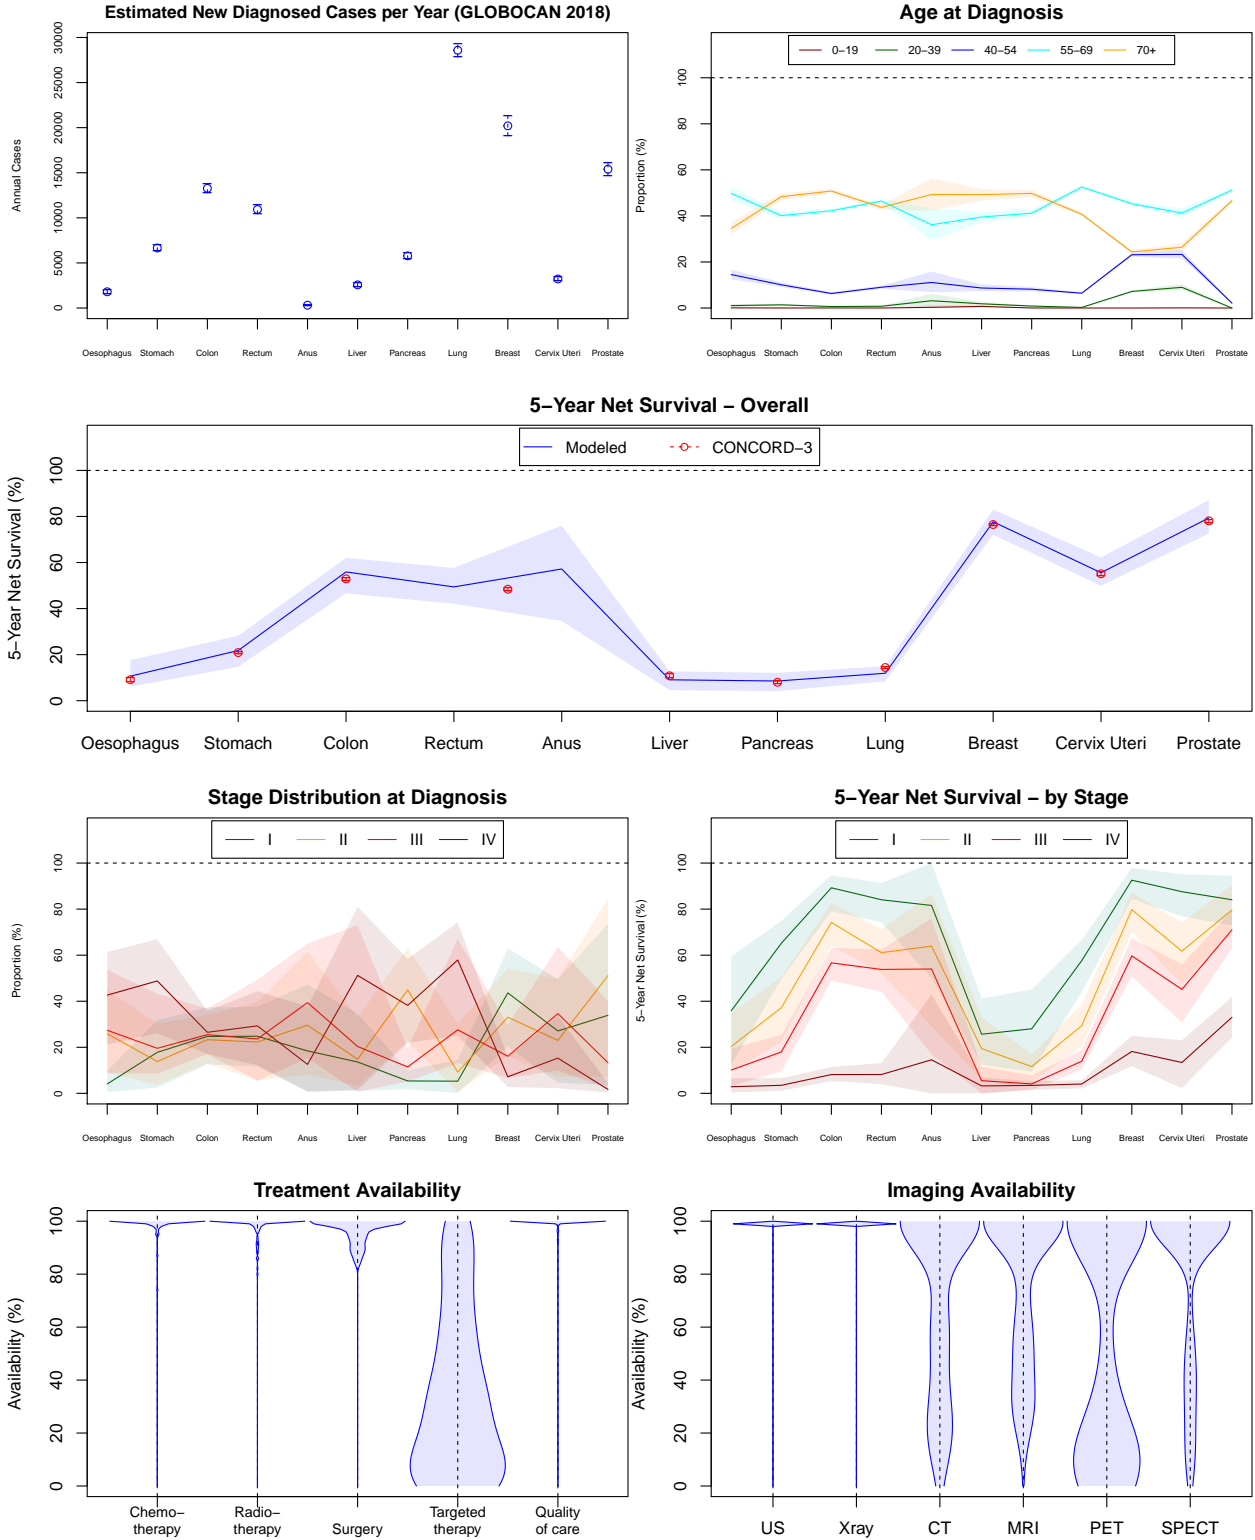

# Portugal

| ISO Code | Region          | Area   | Income Group |
|----------|-----------------|--------|--------------|
| PRT      | Southern Europe | Europe | High income  |

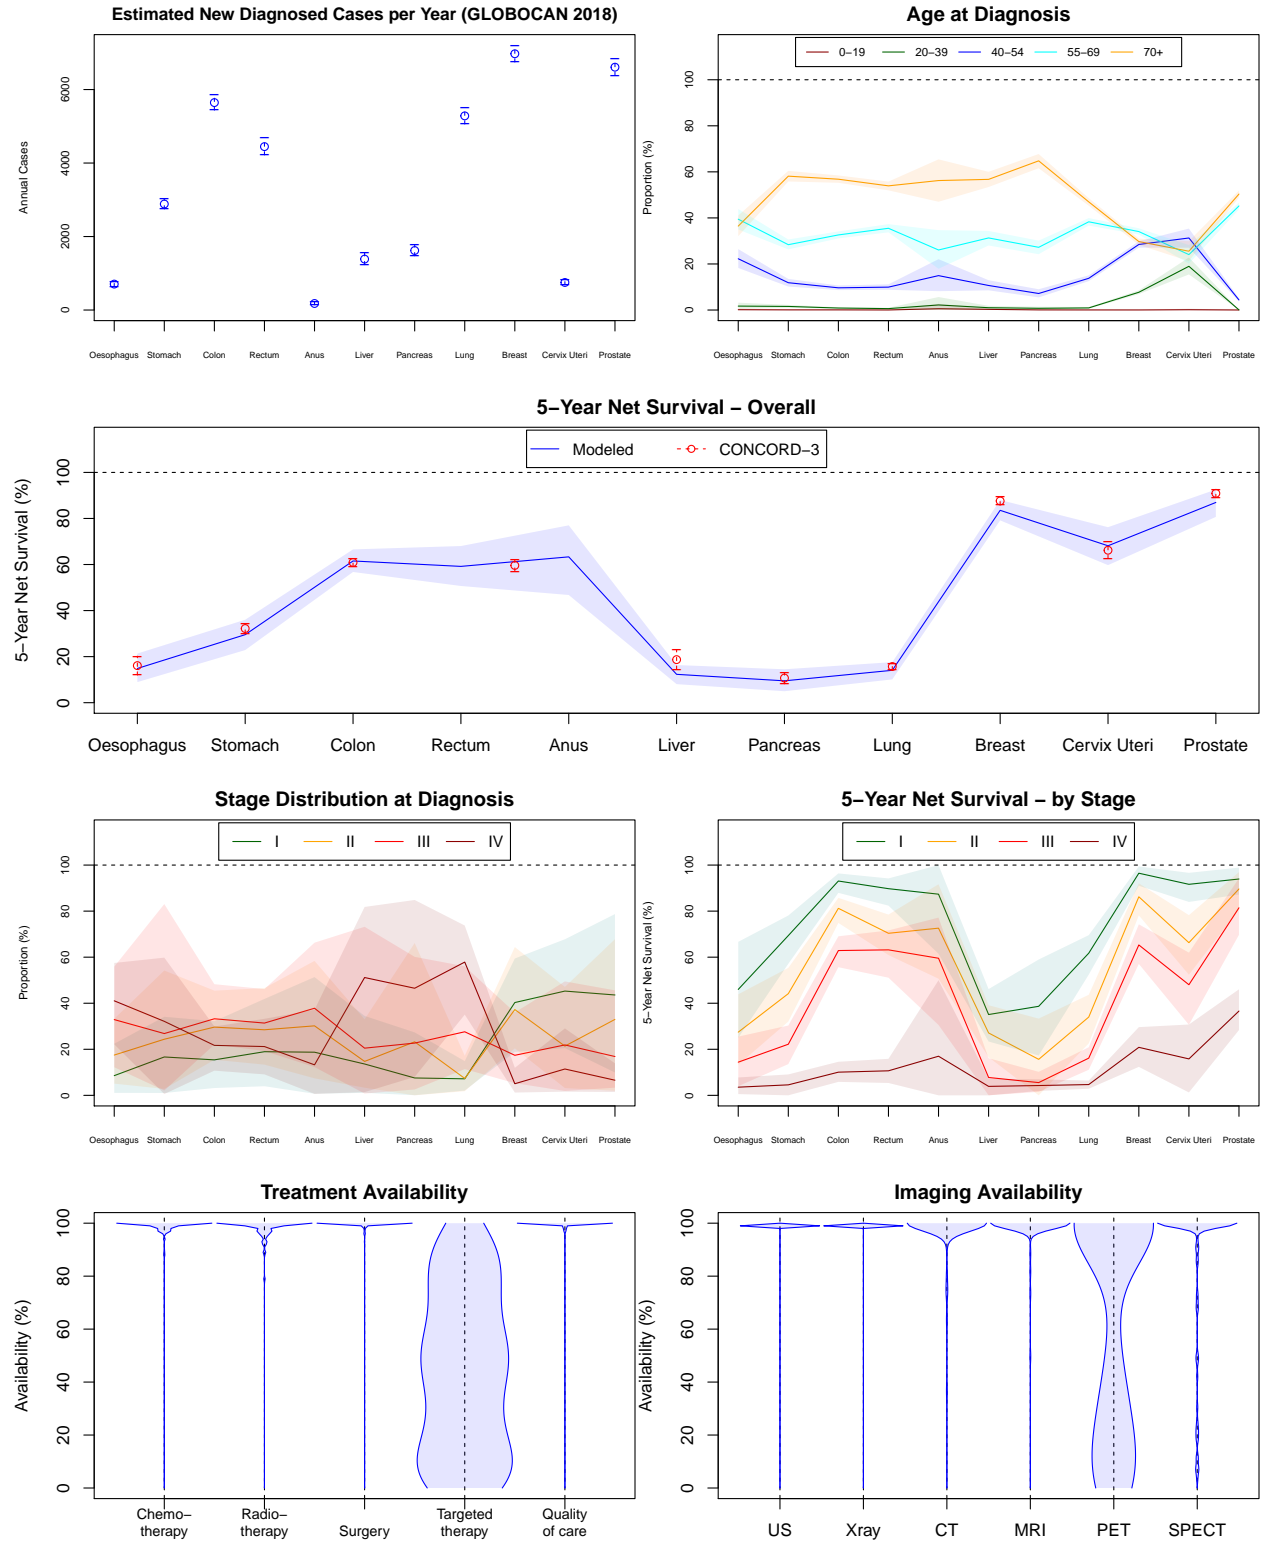

# Puerto Rico

| ISO Code | Region    | Area                            | Income Group |
|----------|-----------|---------------------------------|--------------|
| PRI      | Caribbean | Latin America and the Caribbean | High income  |

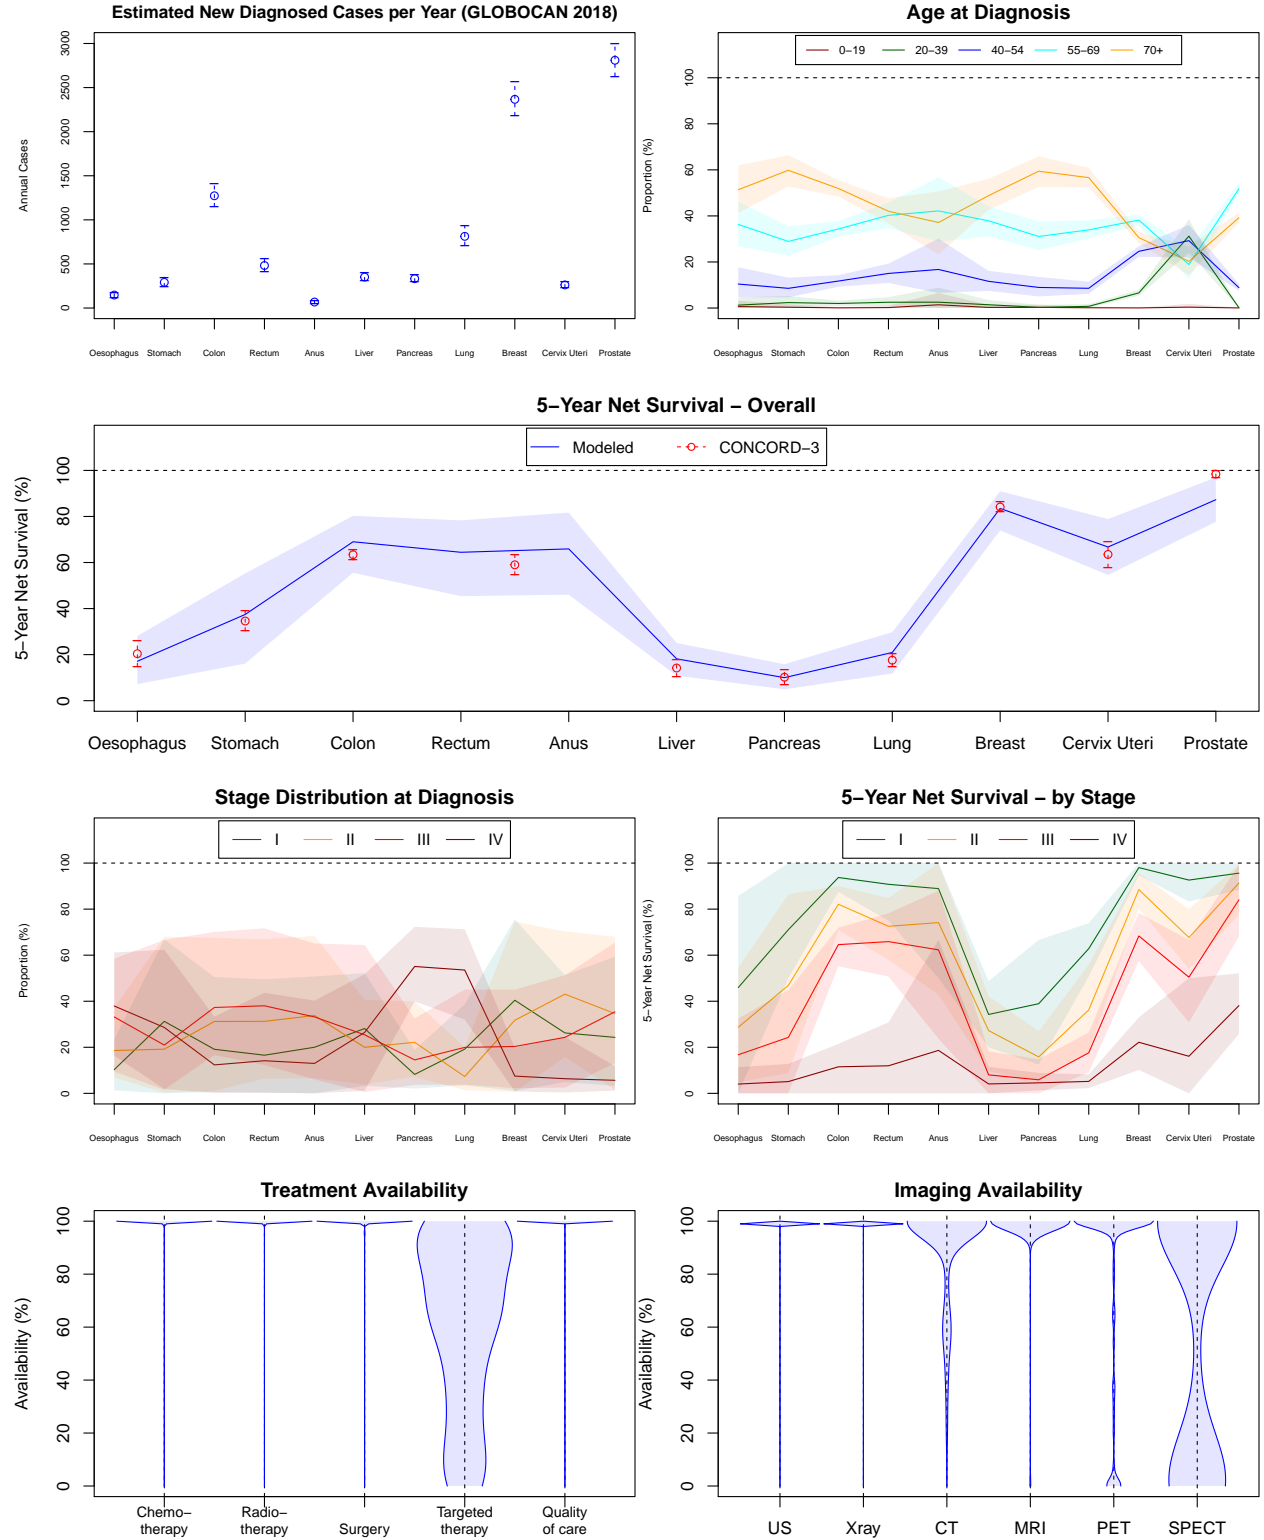

# Qatar

| ISO Code | Region       | Area | Income Group |
|----------|--------------|------|--------------|
| QAT      | Western Asia | Asia | High income  |

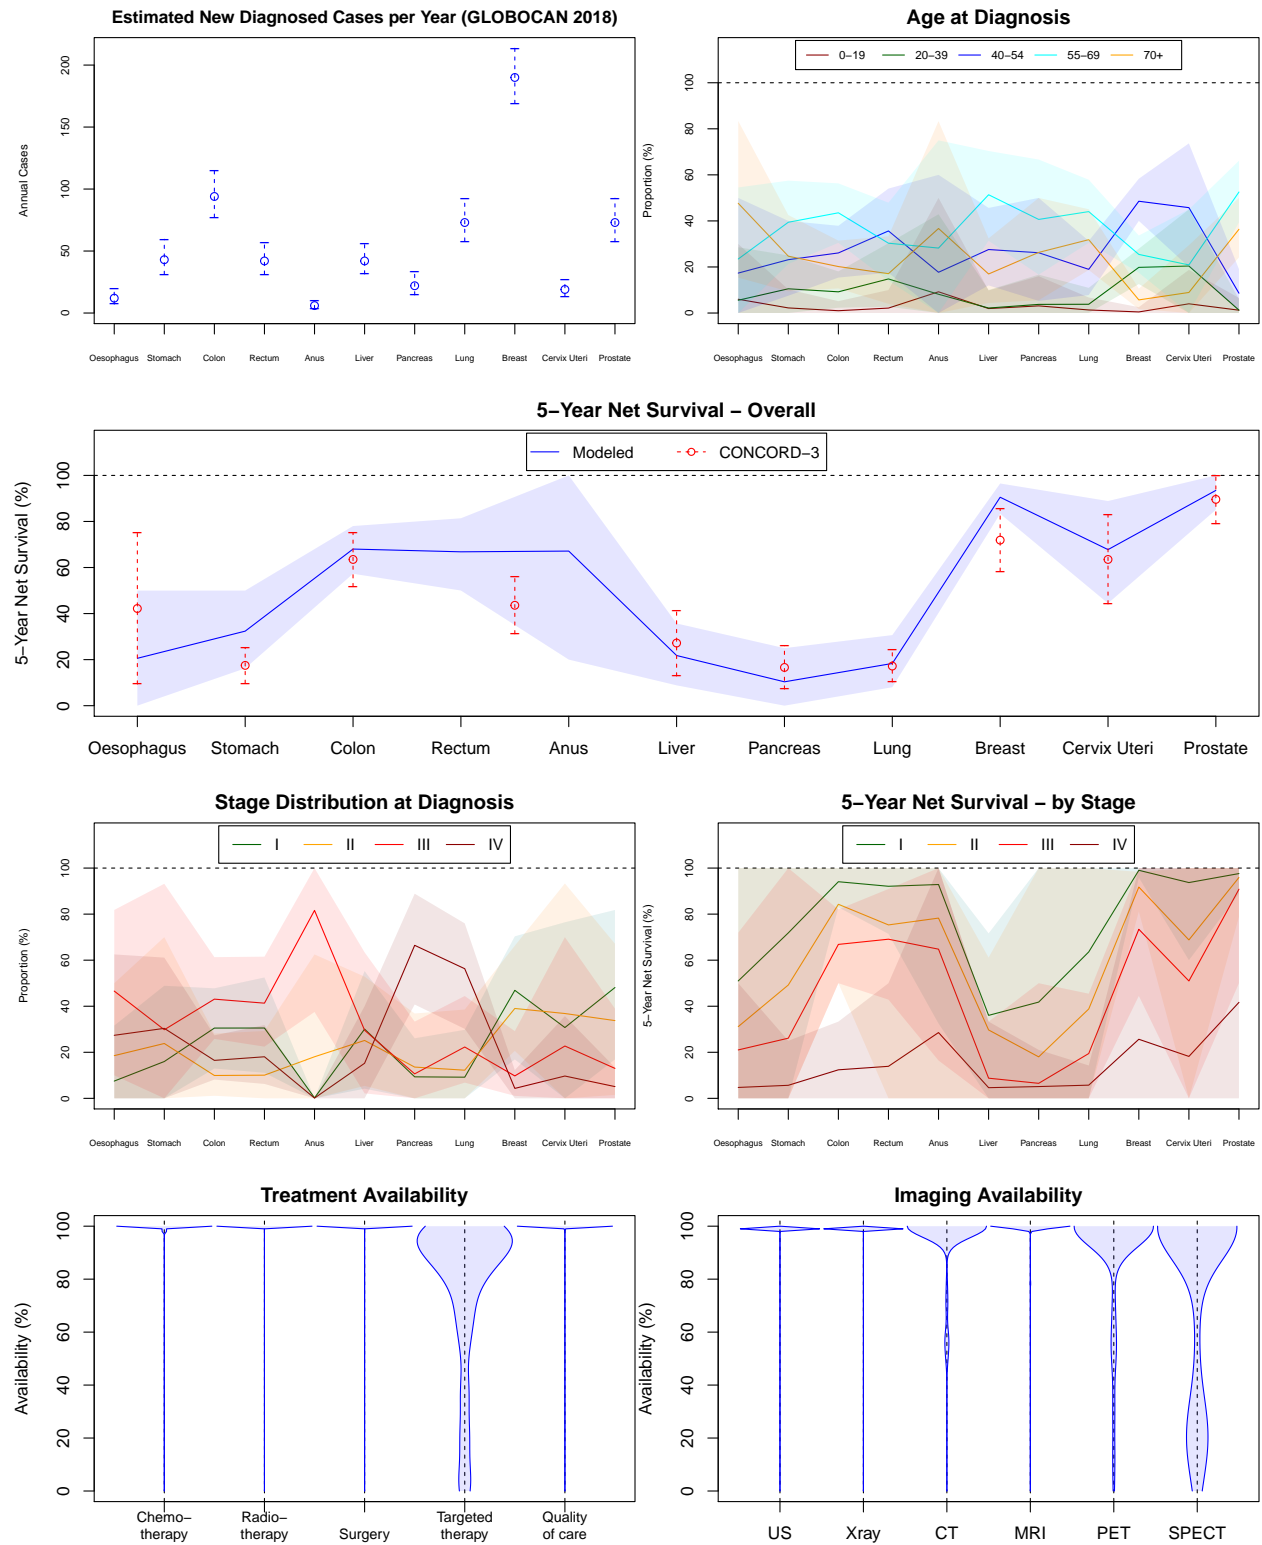

# Republic of Korea

| ISO Code | Region       | Area | Income Group |
|----------|--------------|------|--------------|
| KOR      | Eastern Asia | Asia | High income  |

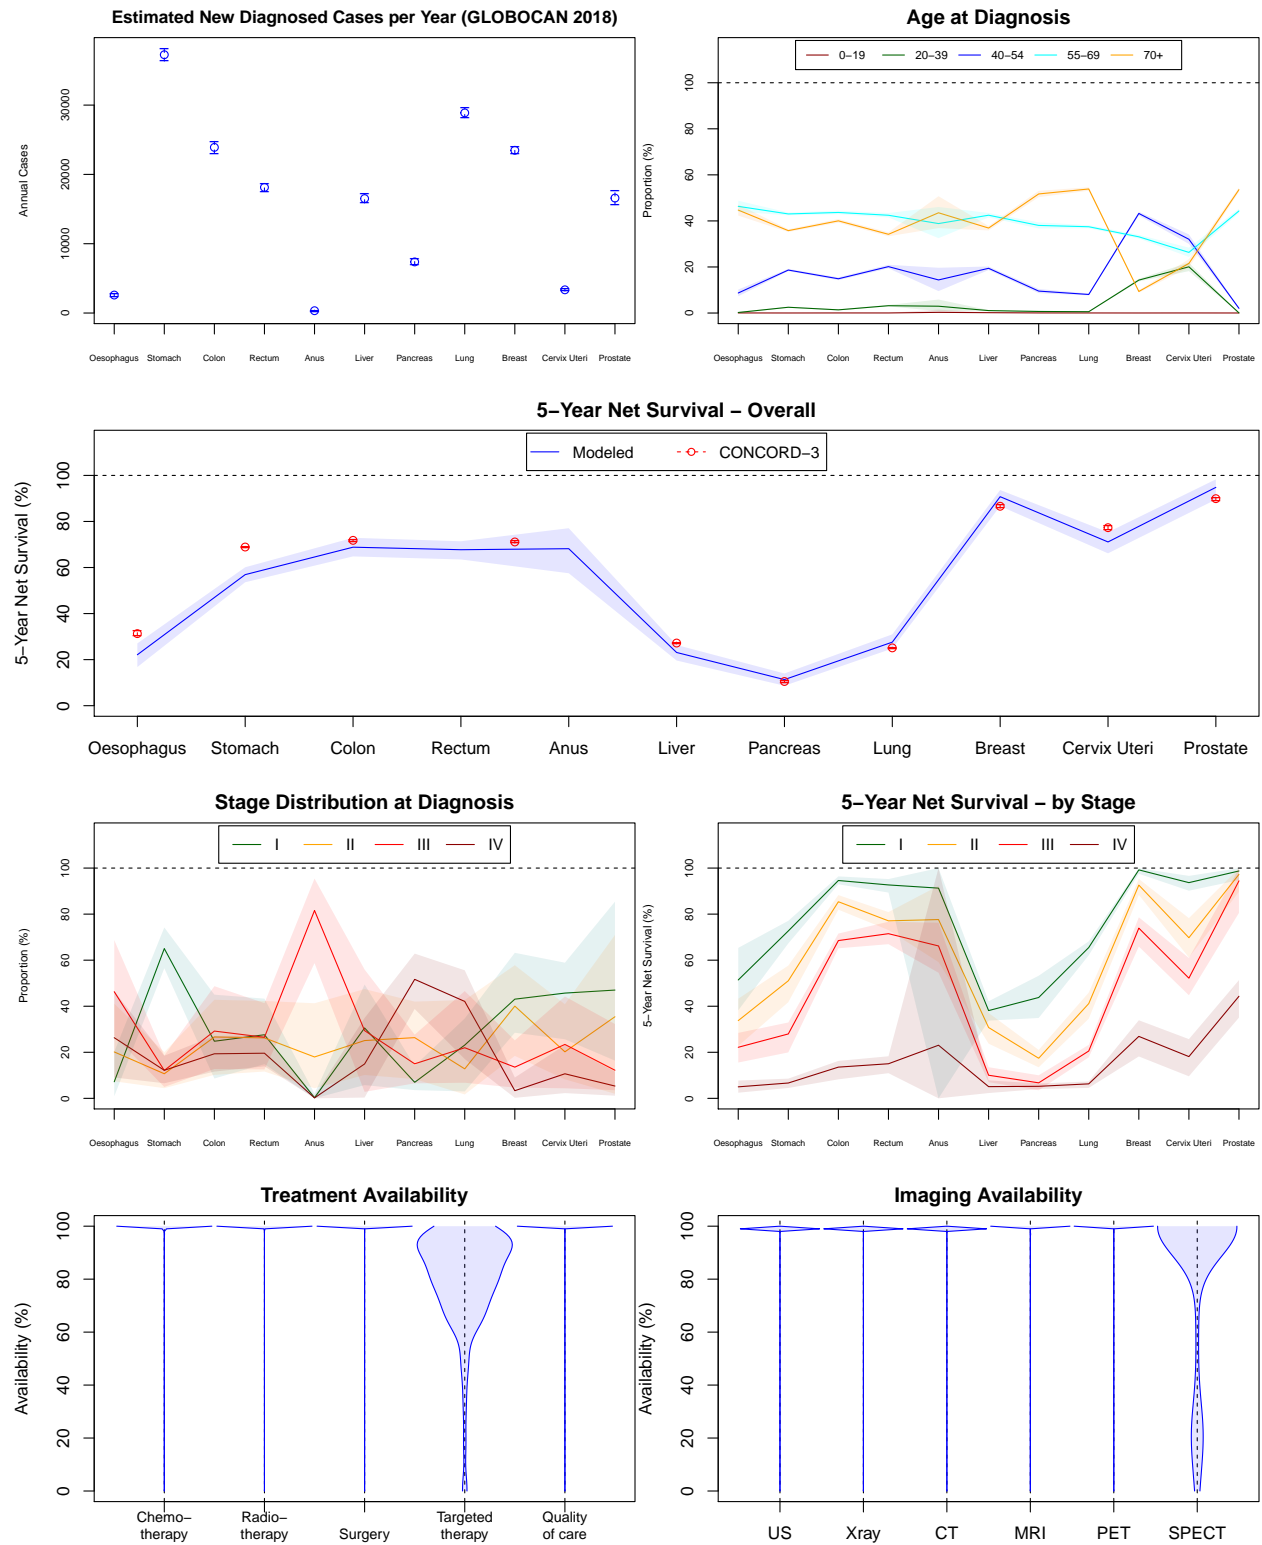

# Republic of Moldova

| ISO Code | Region         | Area   | Income Group        |
|----------|----------------|--------|---------------------|
| MDA      | Eastern Europe | Europe | Lower middle income |

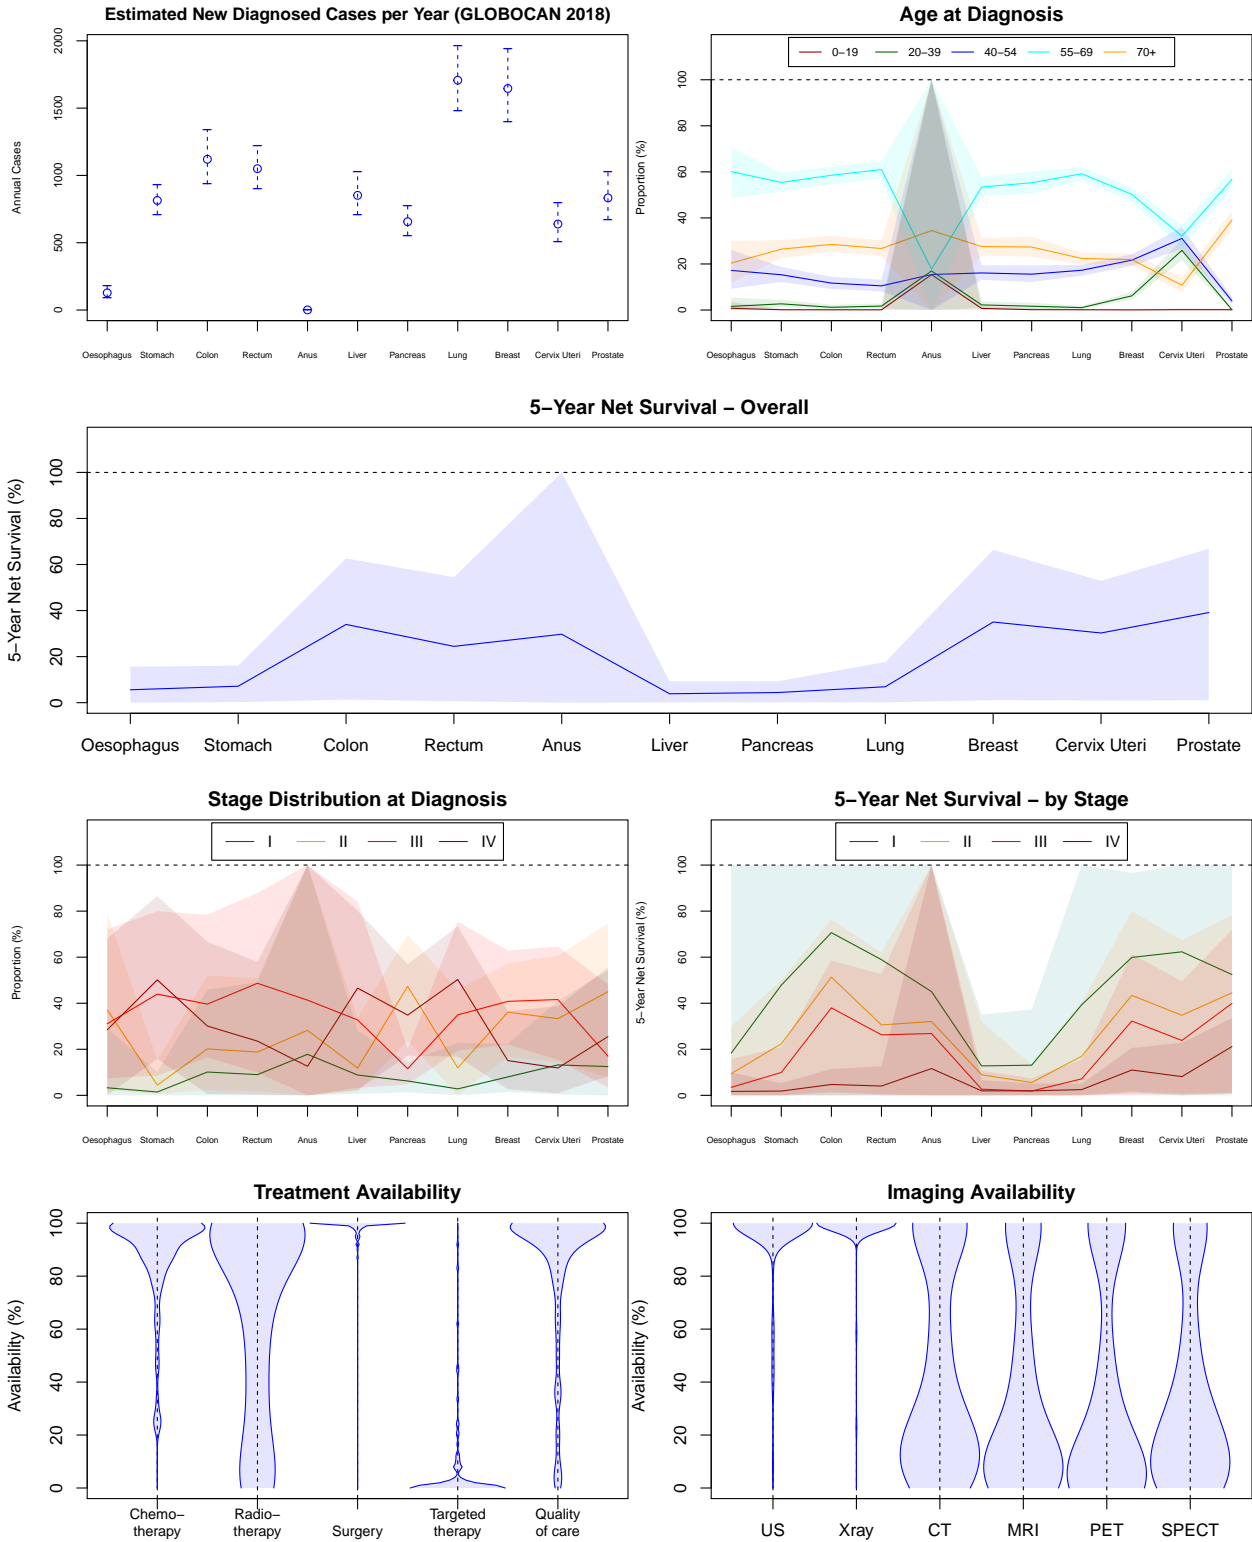



# Romania

| ISO Code | Region         | Area   | Income Group        |
|----------|----------------|--------|---------------------|
| ROU      | Eastern Europe | Europe | Upper middle income |

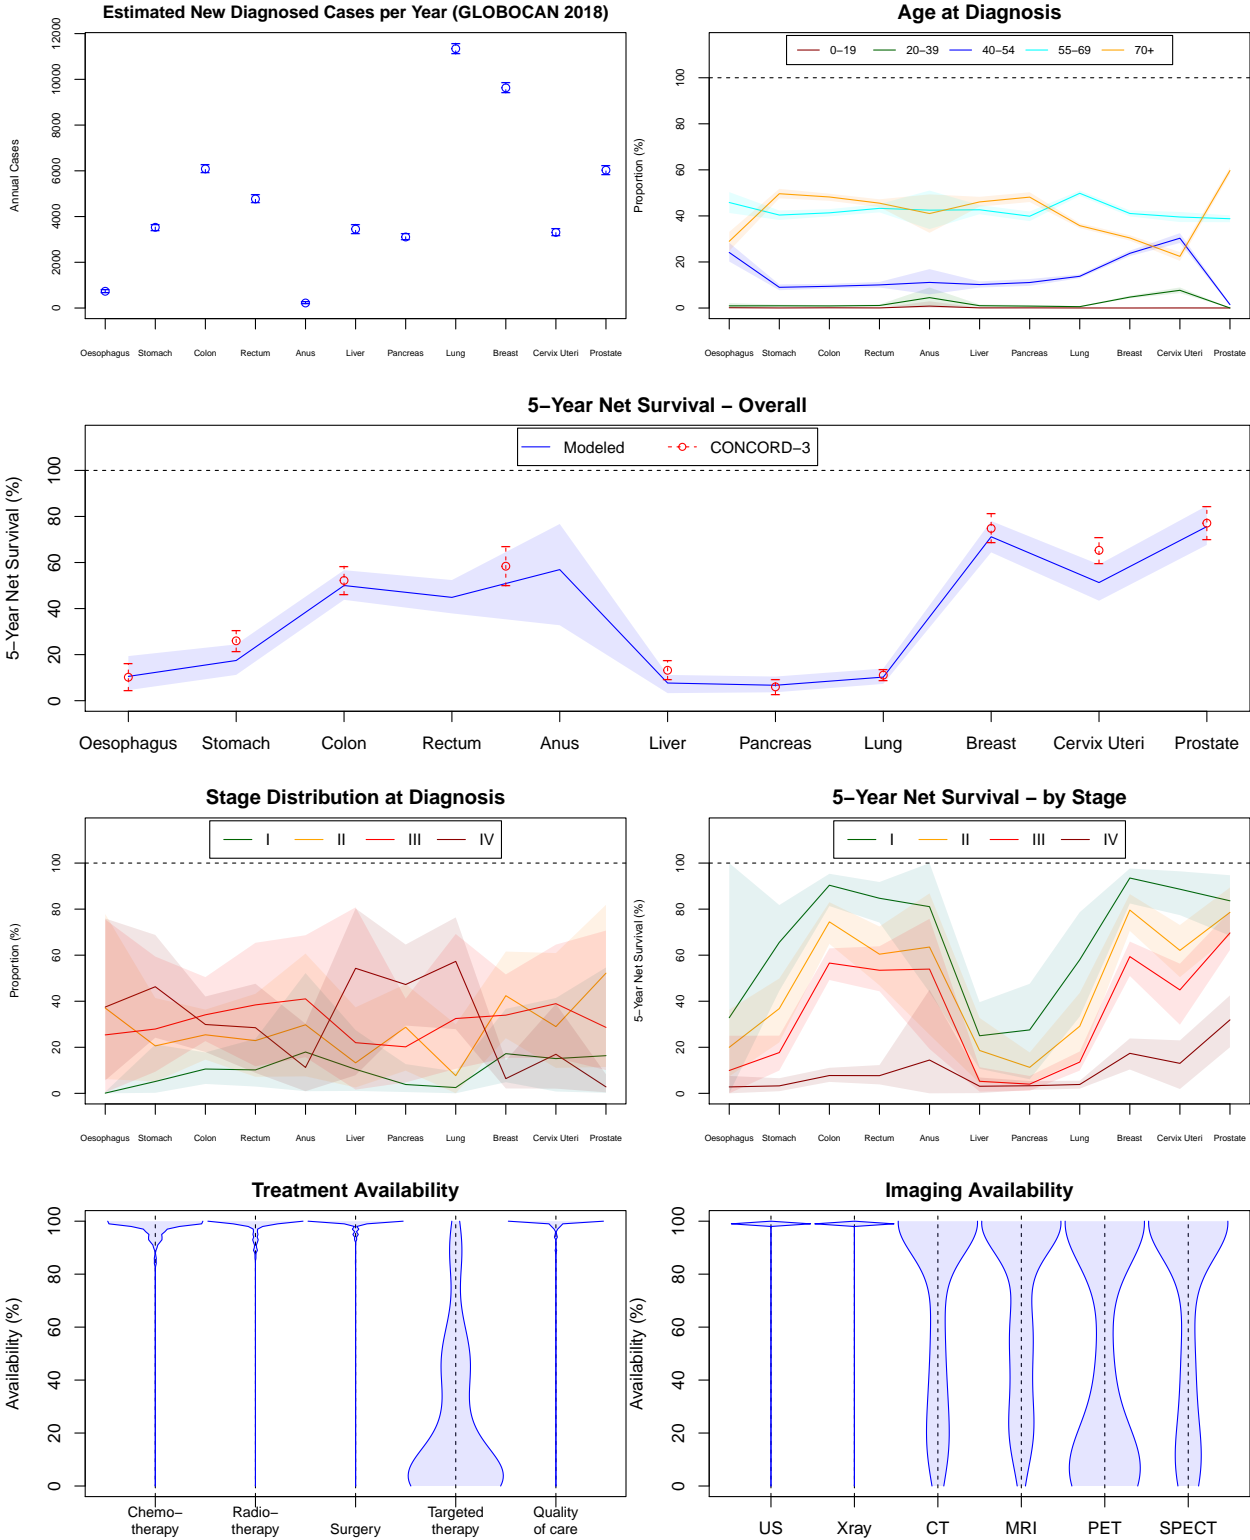

# Russian Federation

| ISO Code | Region         | Area   | Income Group        |
|----------|----------------|--------|---------------------|
| RUS      | Eastern Europe | Europe | Upper middle income |

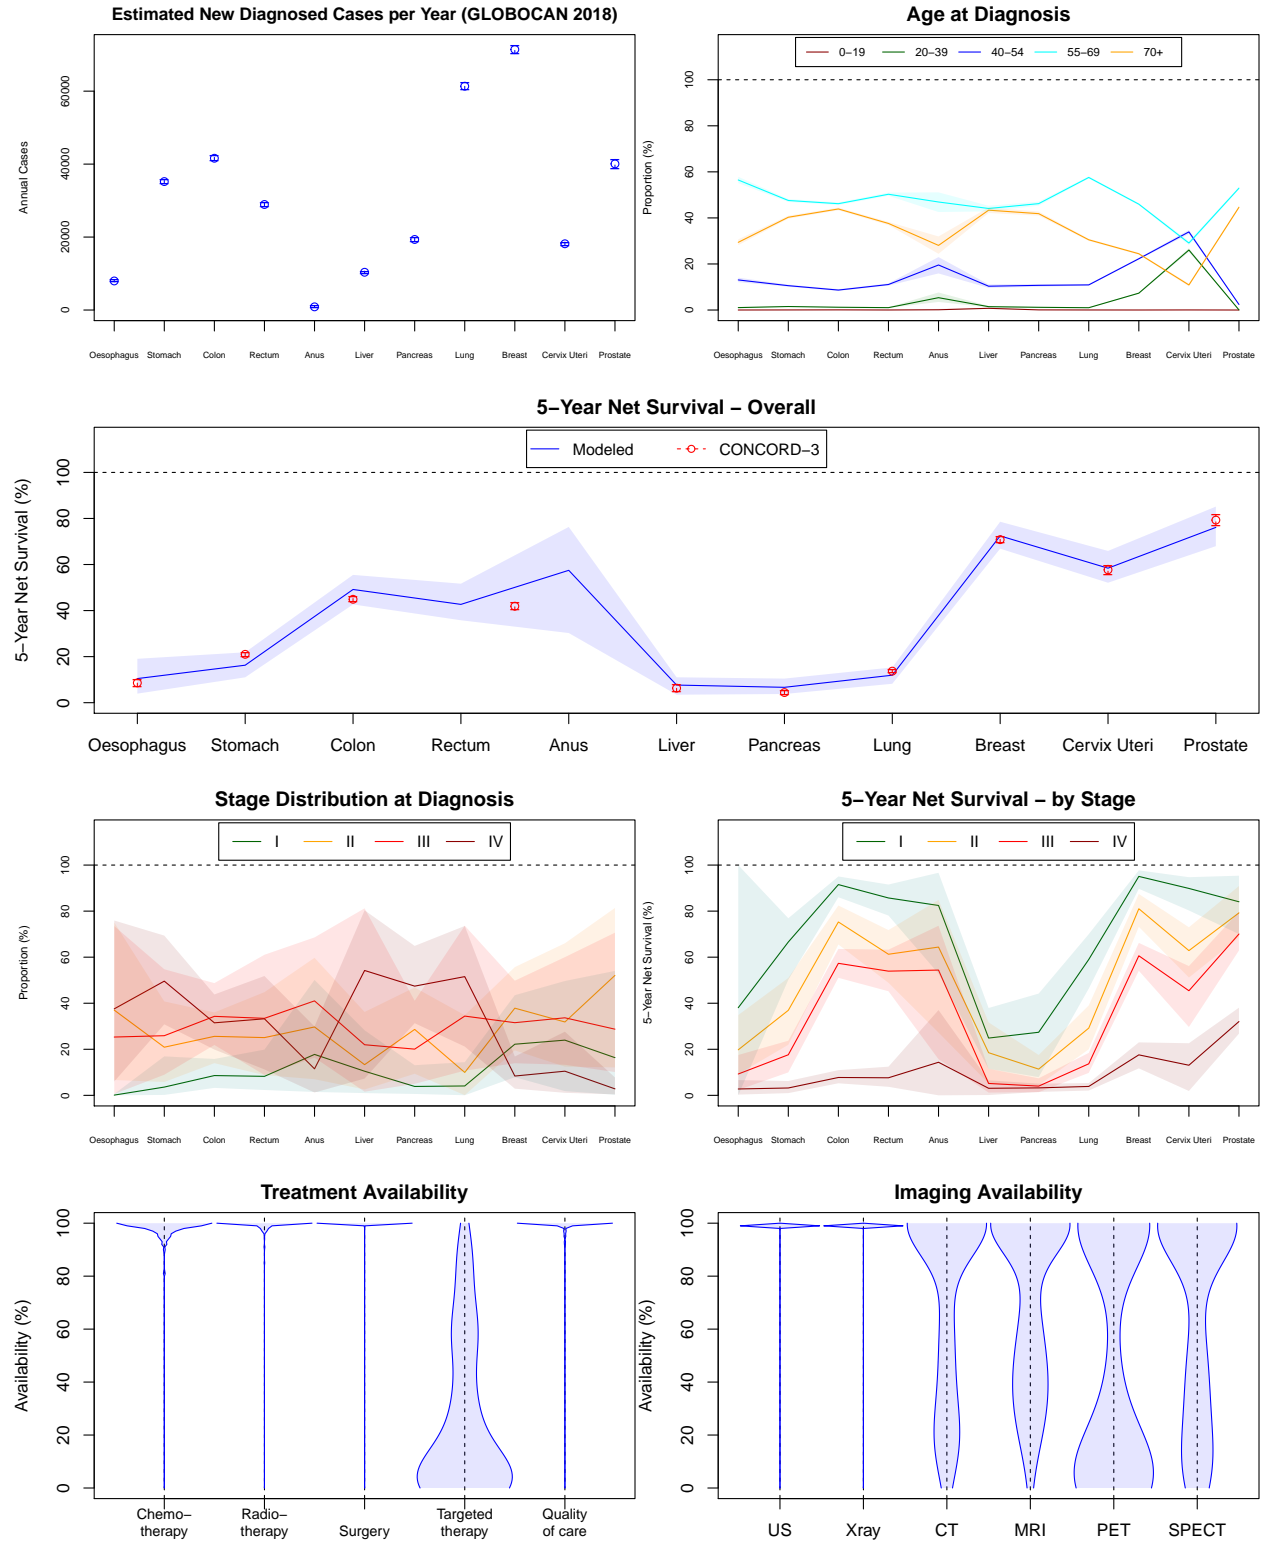

# Rwanda

| ISO Code | Region         | Area   | Income Group |
|----------|----------------|--------|--------------|
| RWA      | Eastern Africa | Africa | Low income   |

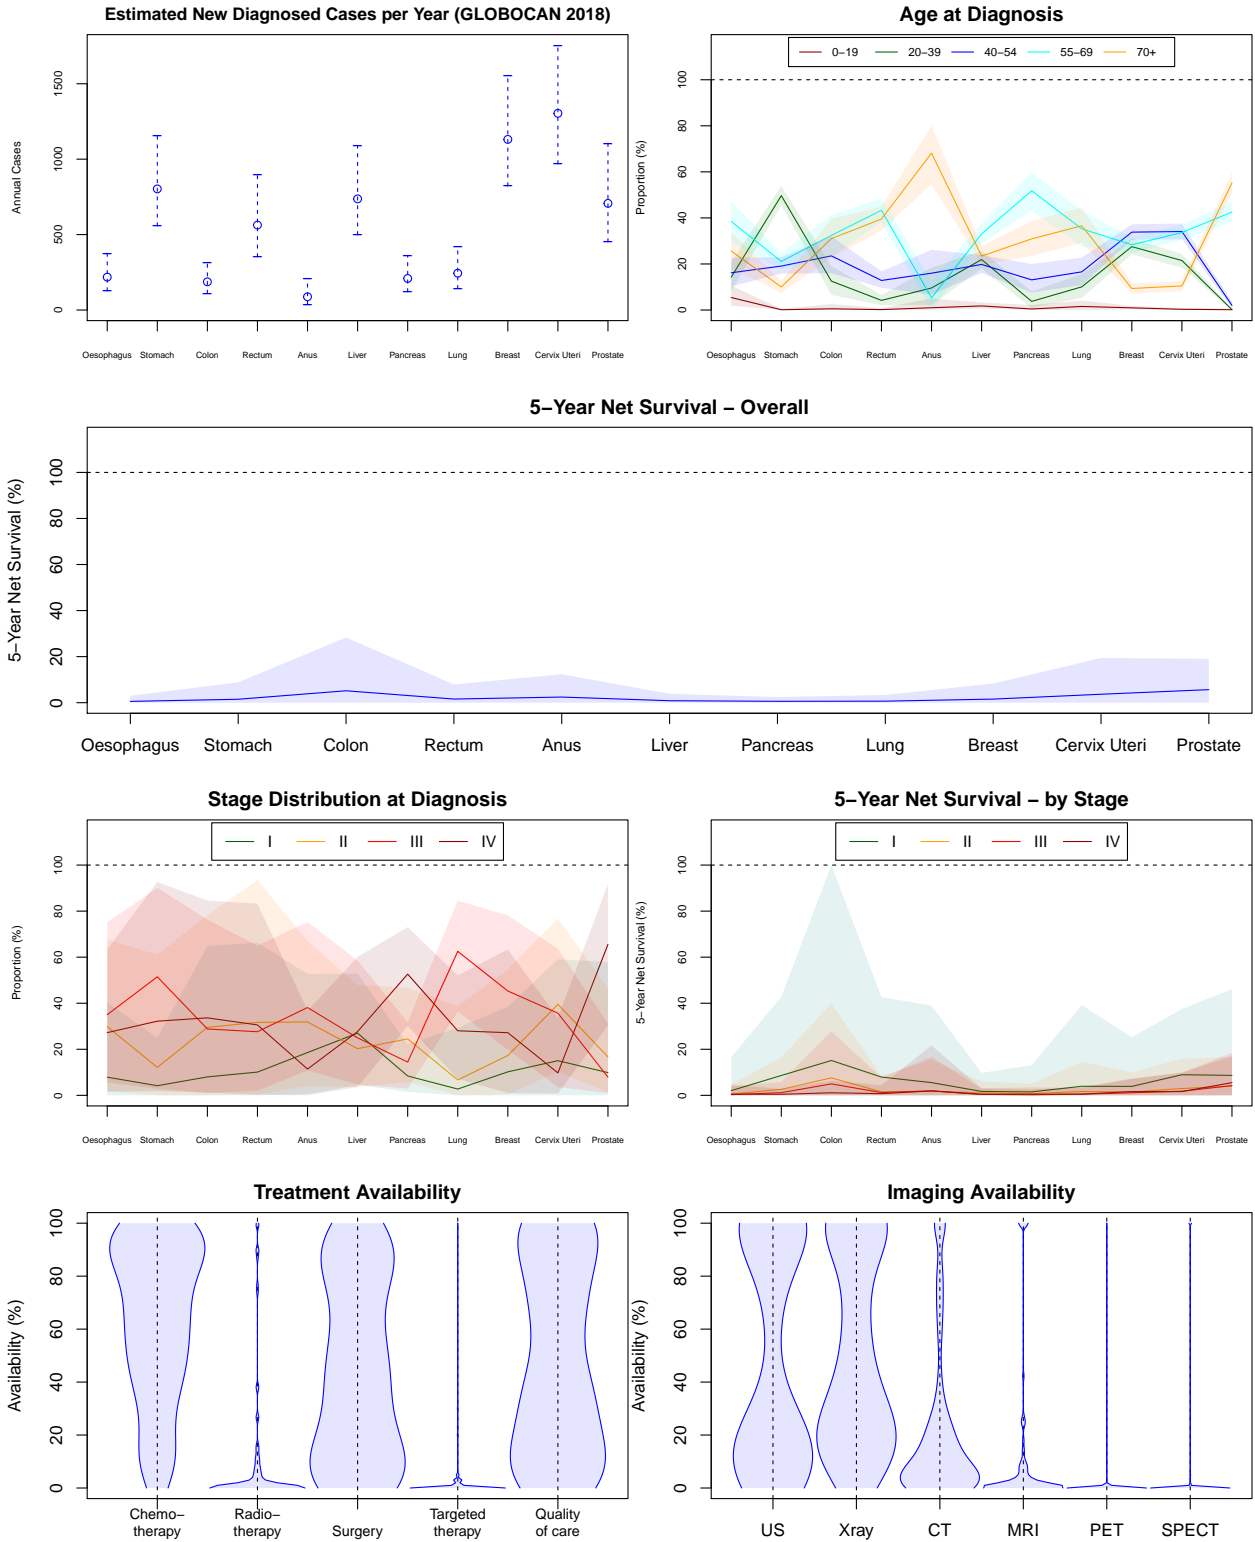

# Saint Kitts and Nevis

| ISO Code | Region    | Area                            | Income Group |
|----------|-----------|---------------------------------|--------------|
| KNA      | Caribbean | Latin America and the Caribbean | High income  |

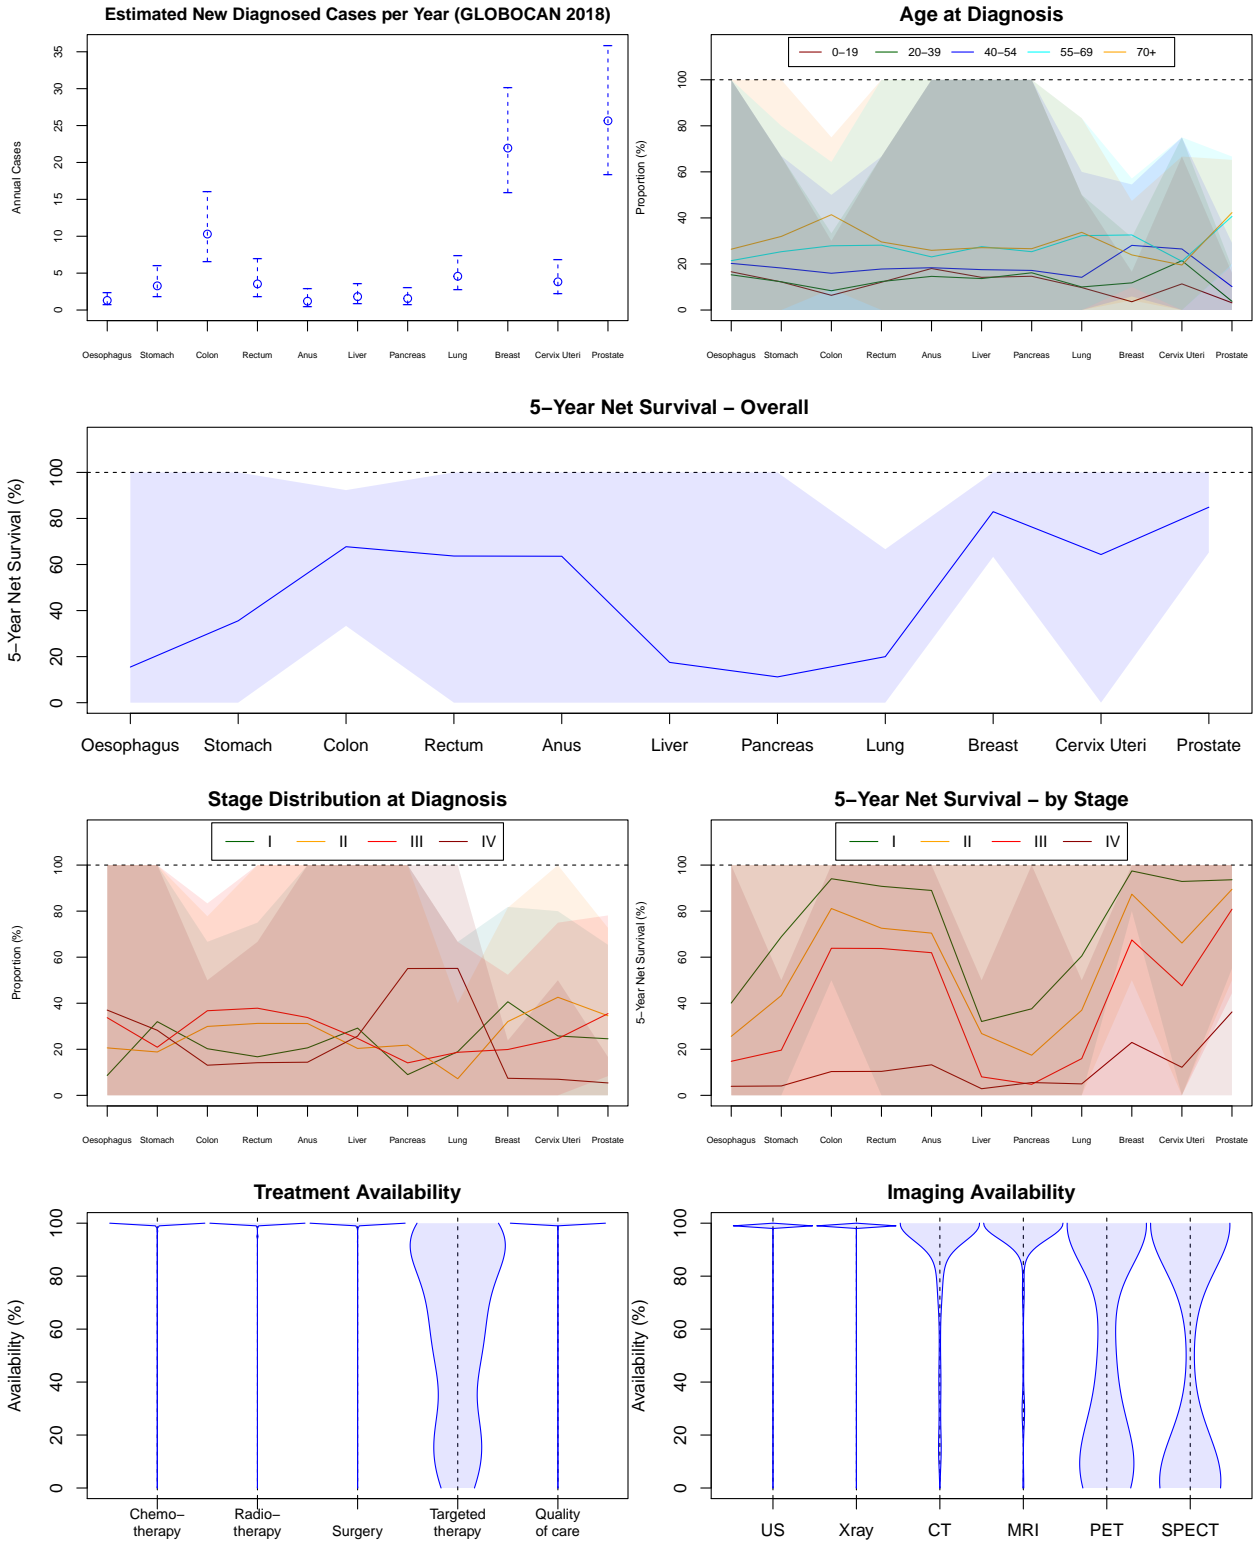

# Saint Lucia

| ISO Code | Region    | Area                            | Income Group        |
|----------|-----------|---------------------------------|---------------------|
| LCA      | Caribbean | Latin America and the Caribbean | Upper middle income |

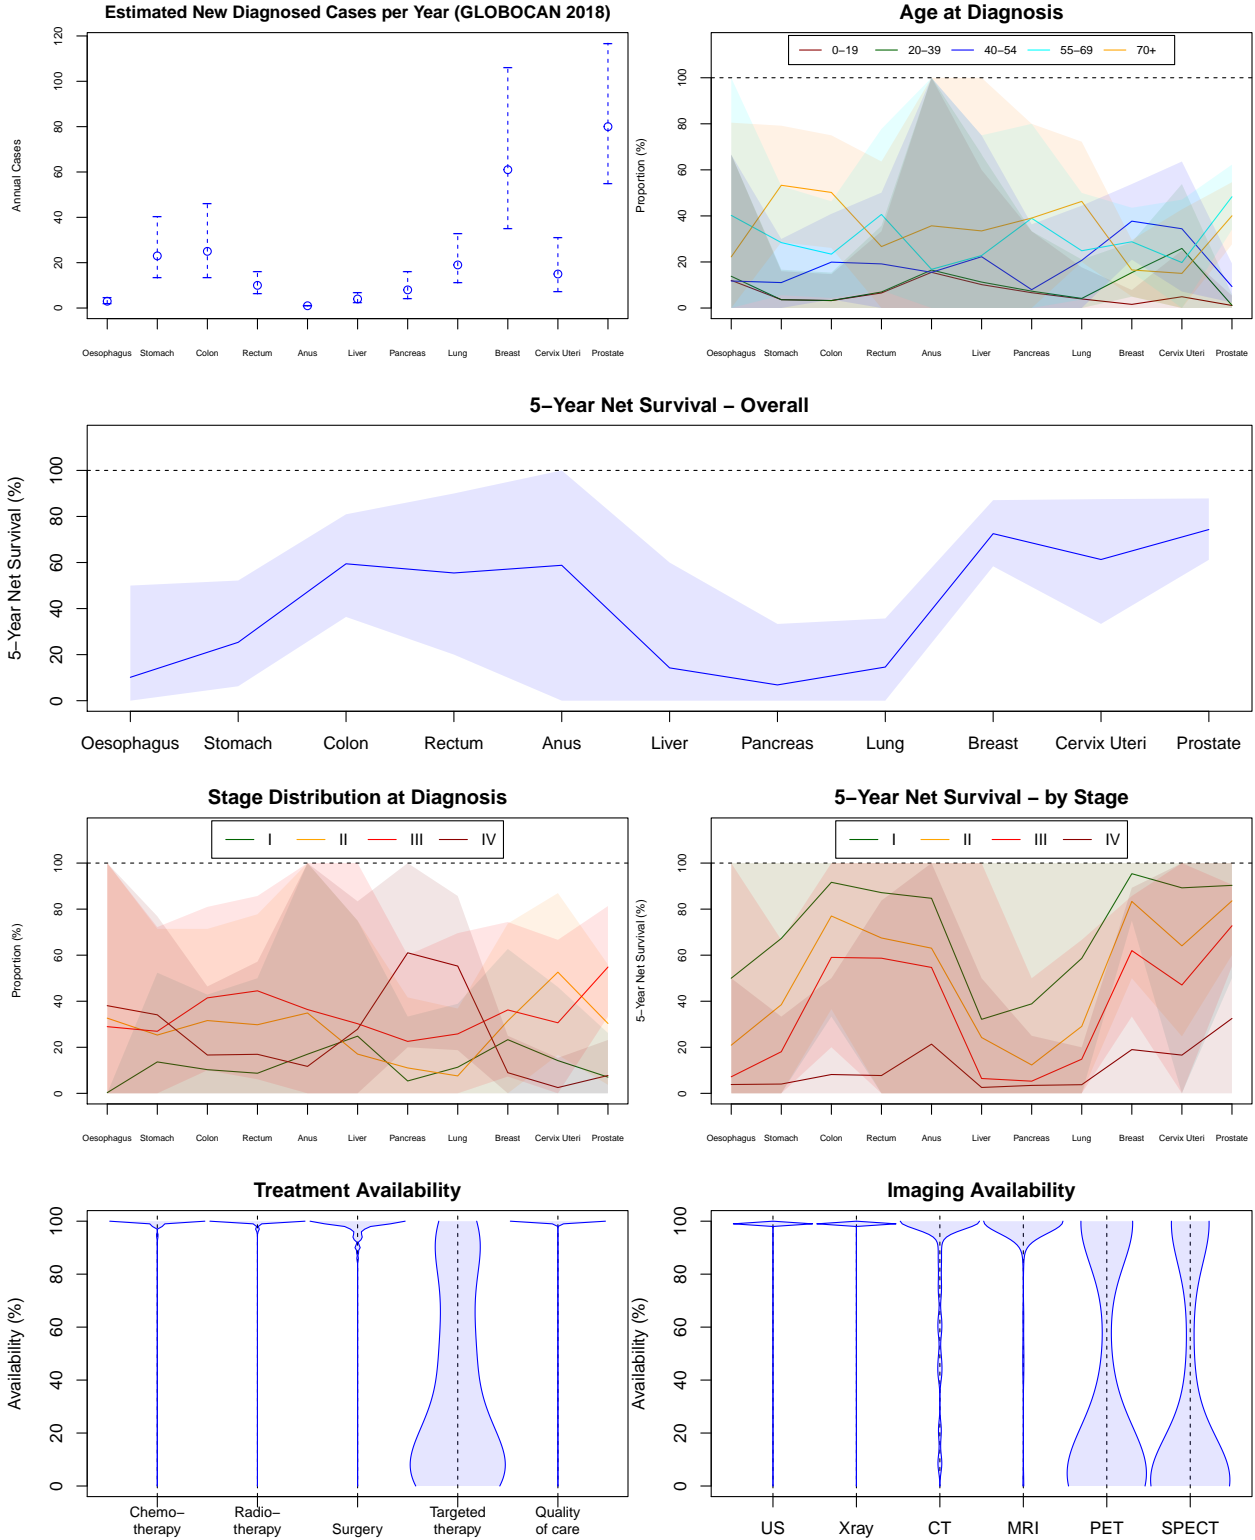

# Saint Vincent and the Grenadines

| ISO Code | Region    | Area                            | Income Group        |
|----------|-----------|---------------------------------|---------------------|
| VCT      | Caribbean | Latin America and the Caribbean | Upper middle income |

**Estimated New Diagnosed Cases per Year (GLOBOCAN 2018)**

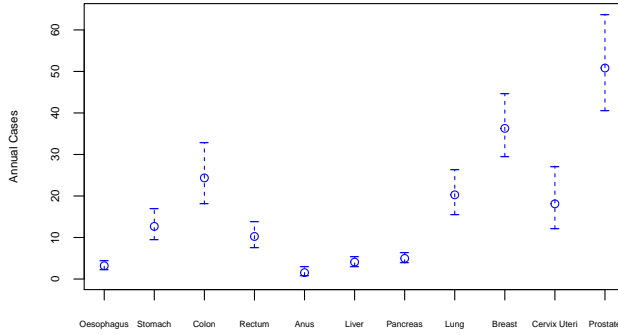

**Age at Diagnosis**

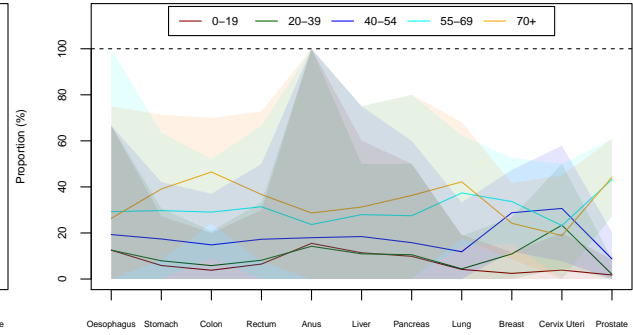

**5-Year Net Survival – Overall**

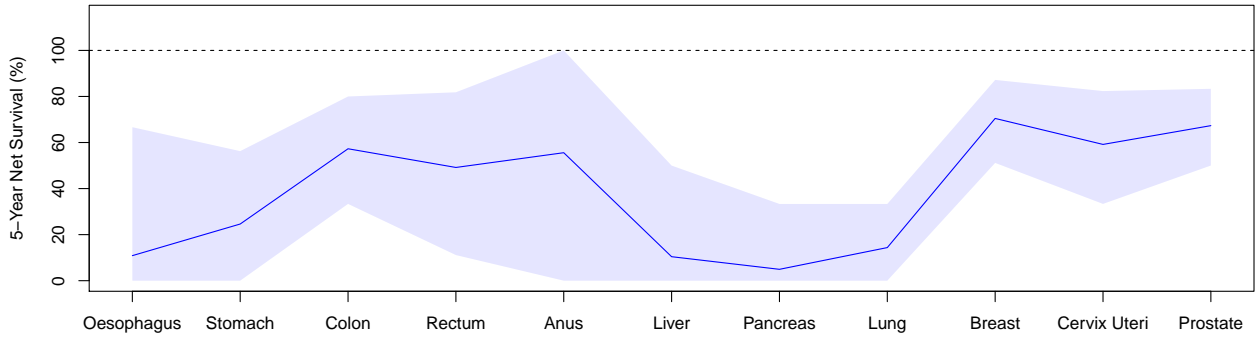

**Stage Distribution at Diagnosis**

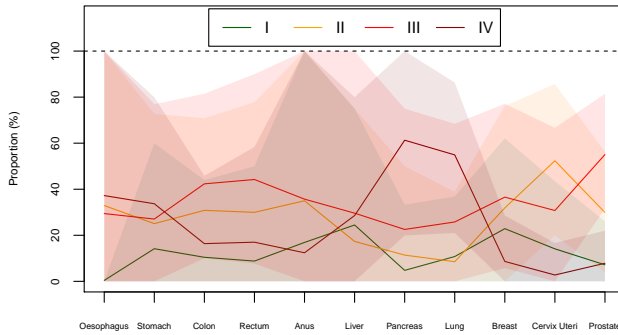

**5-Year Net Survival – by Stage**

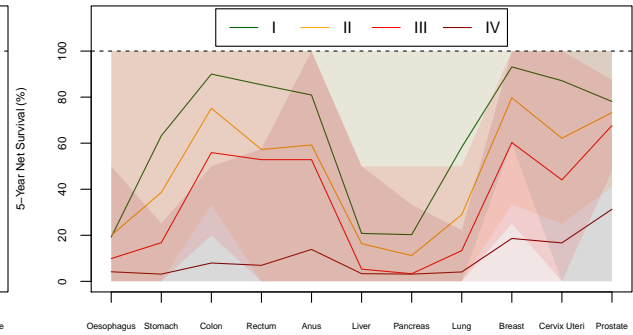

**Treatment Availability**

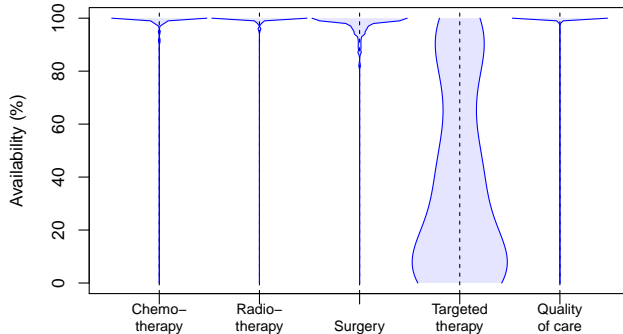

**Imaging Availability**

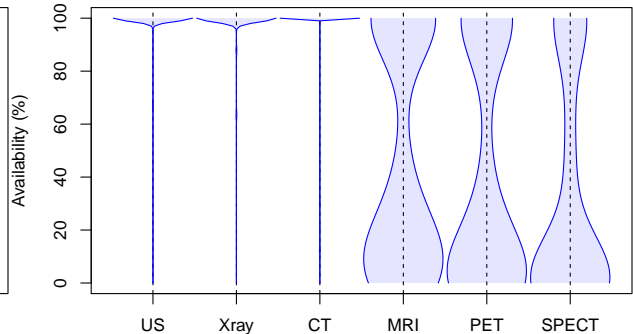

# Samoa

| ISO Code | Region    | Area    | Income Group        |
|----------|-----------|---------|---------------------|
| WSM      | Polynesia | Oceania | Upper middle income |

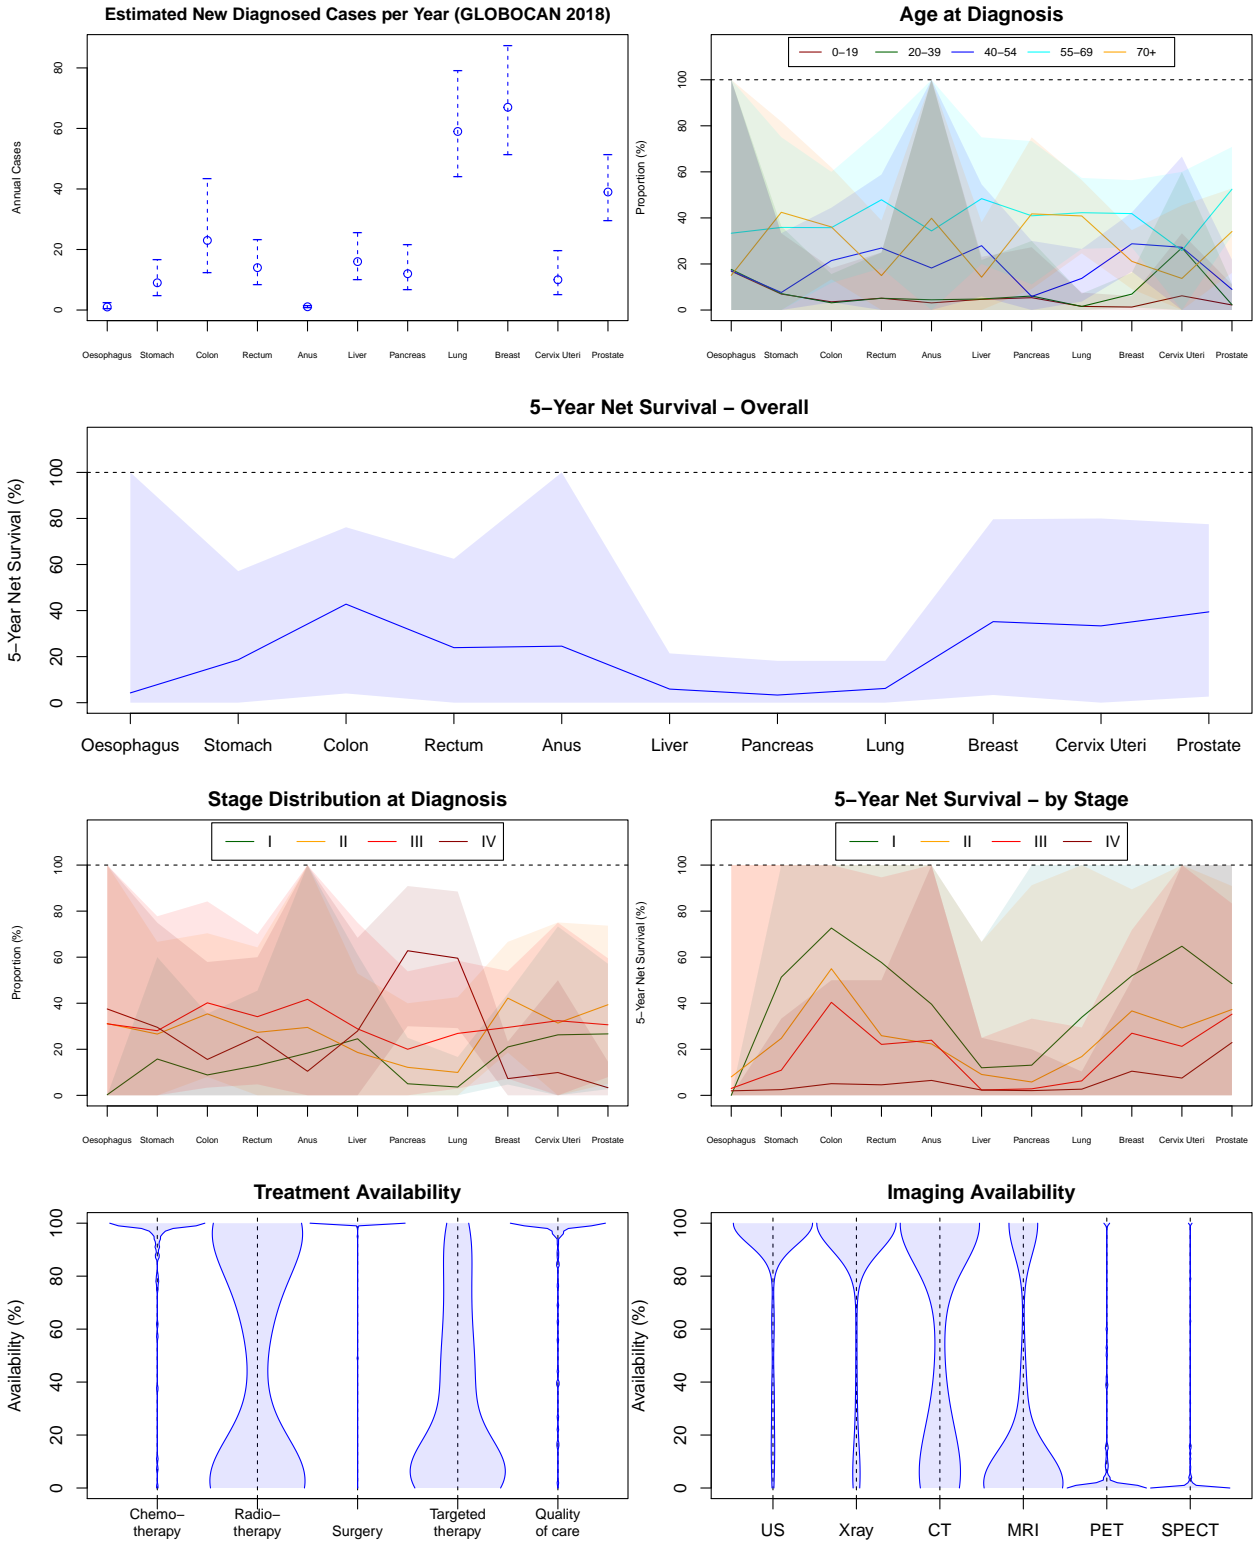

# San Marino

| ISO Code | Region          | Area   | Income Group |
|----------|-----------------|--------|--------------|
| SMR      | Southern Europe | Europe | High income  |

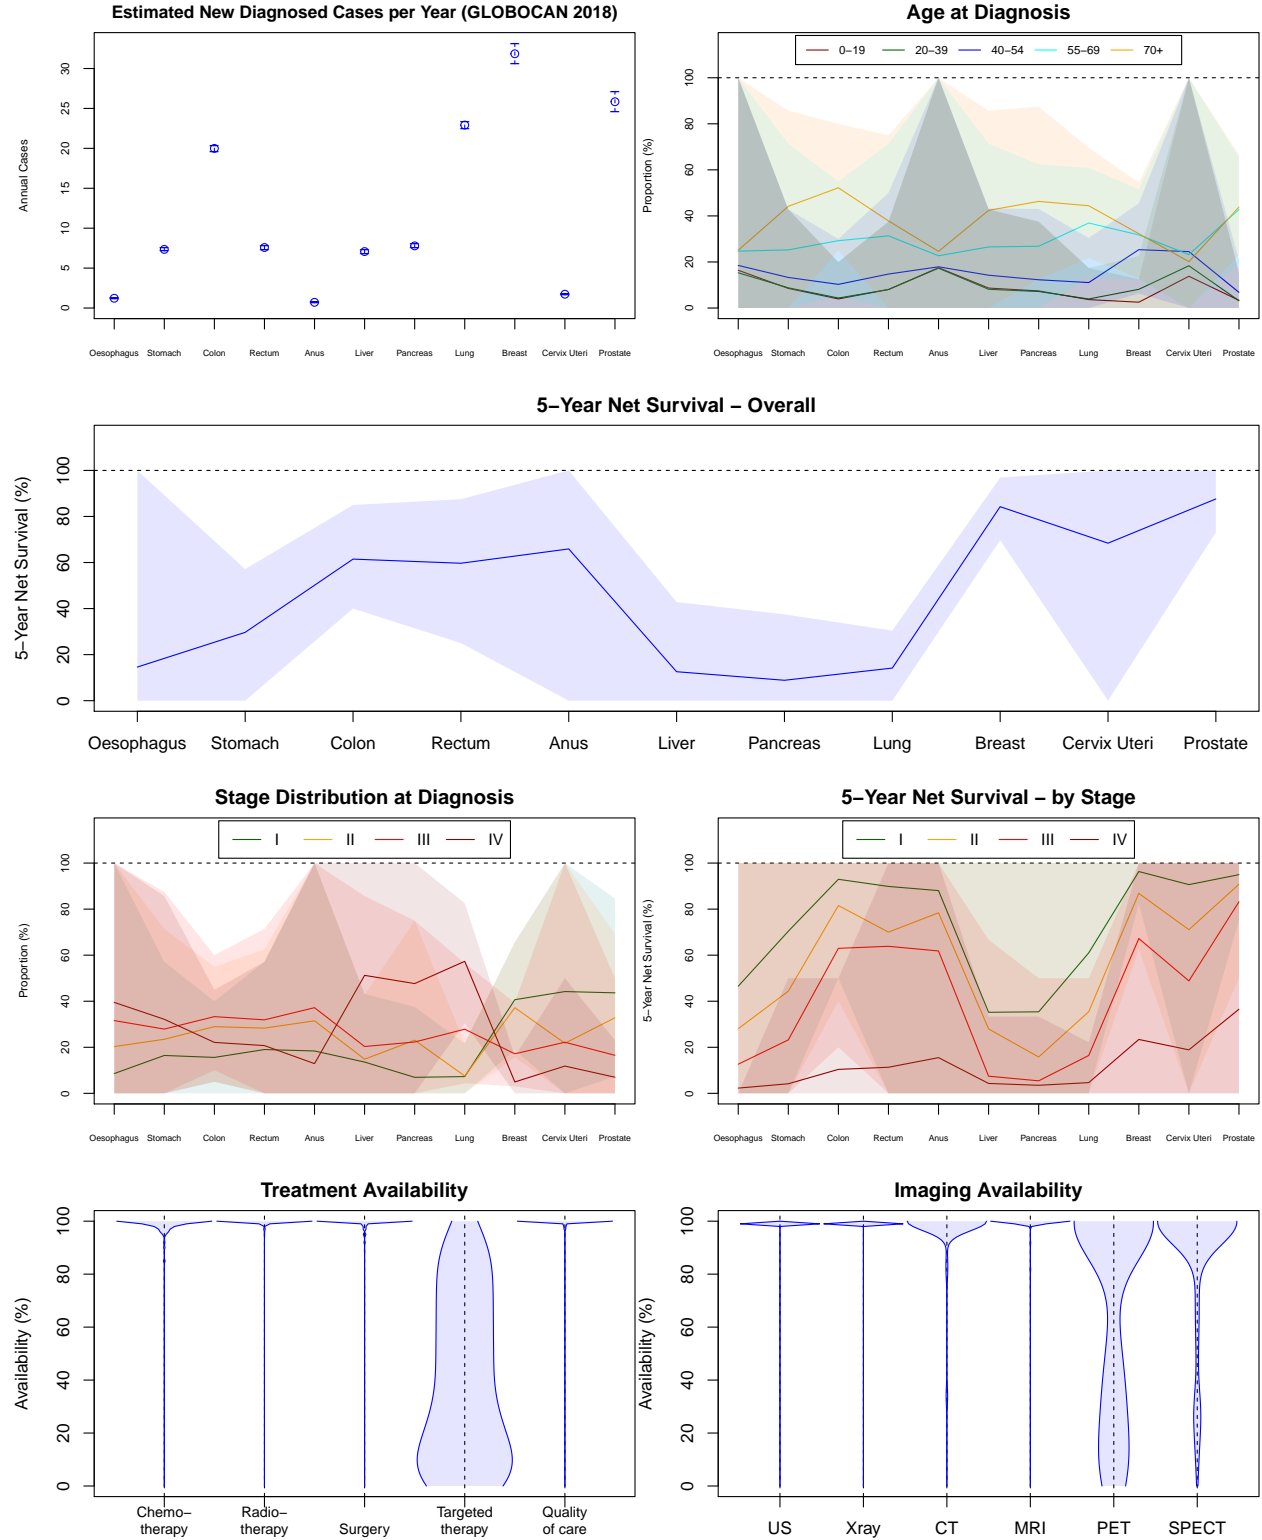



# Sao Tome and Principe

| ISO Code | Region        | Area   | Income Group        |
|----------|---------------|--------|---------------------|
| STP      | Middle Africa | Africa | Lower middle income |

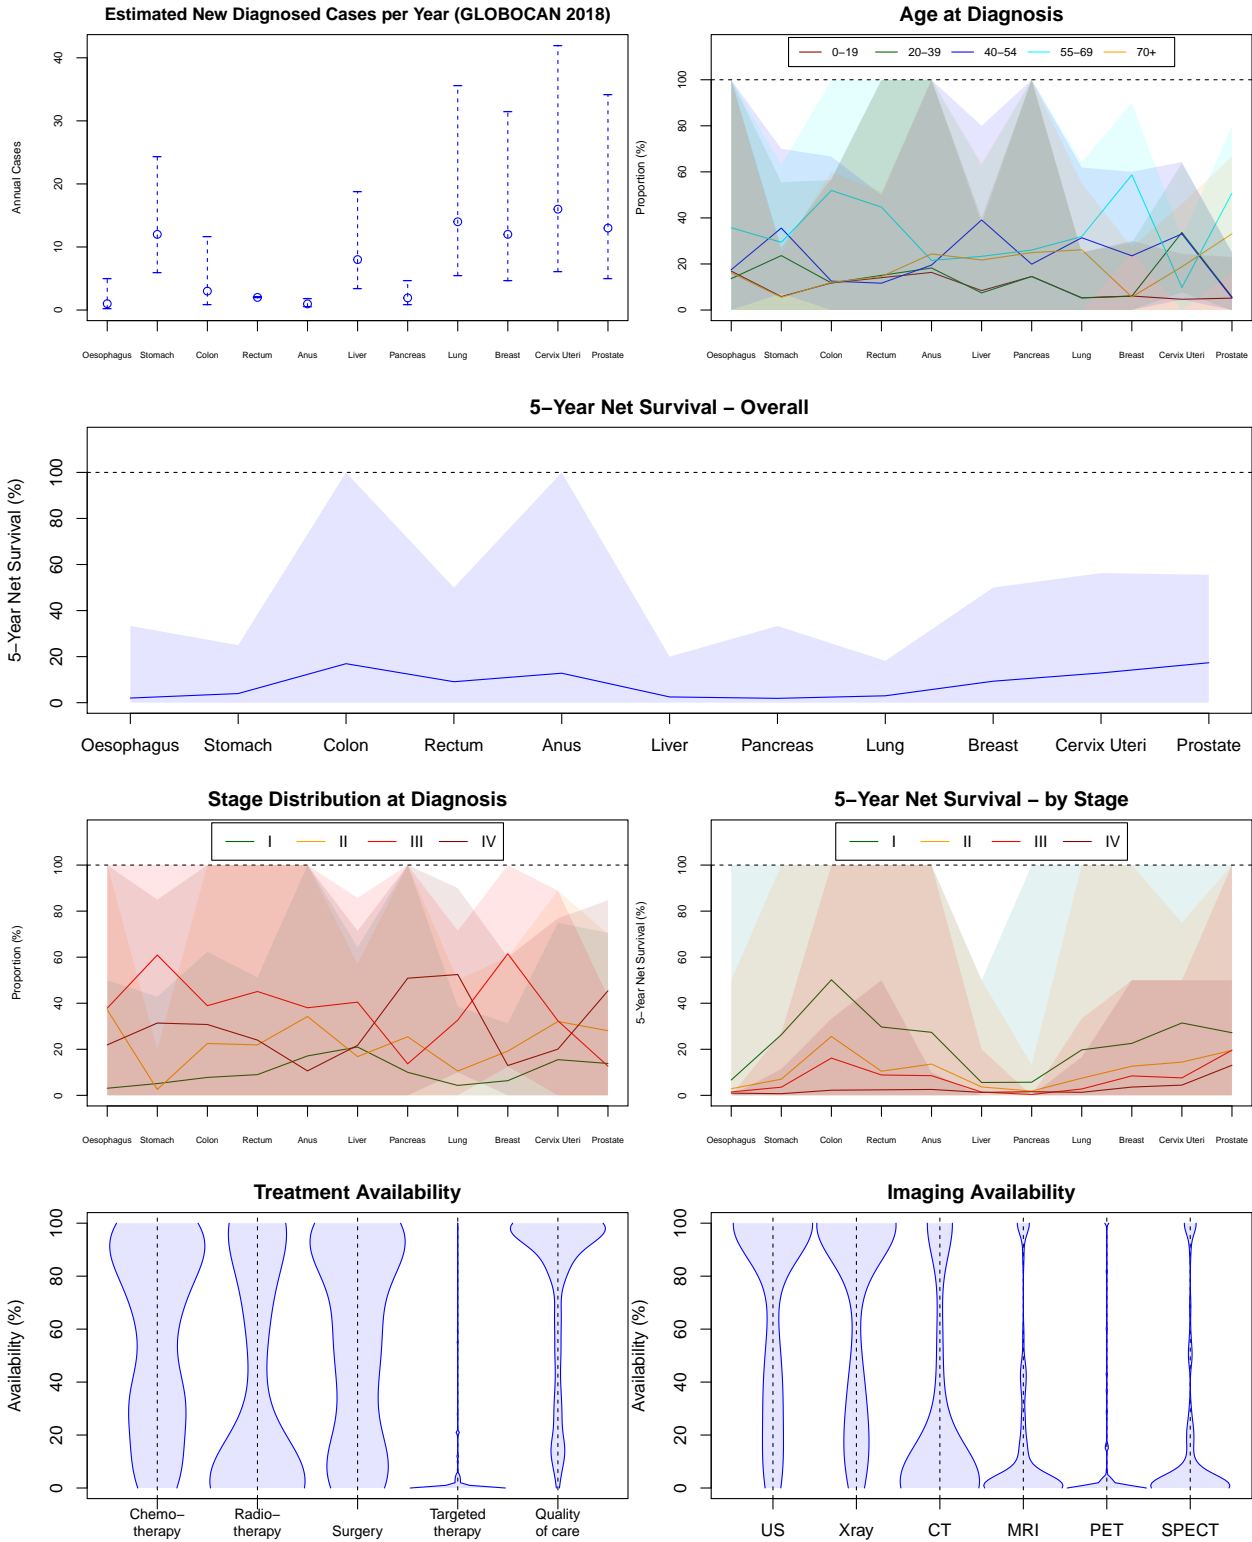

# Saudi Arabia

| ISO Code | Region       | Area | Income Group |
|----------|--------------|------|--------------|
| SAU      | Western Asia | Asia | High income  |

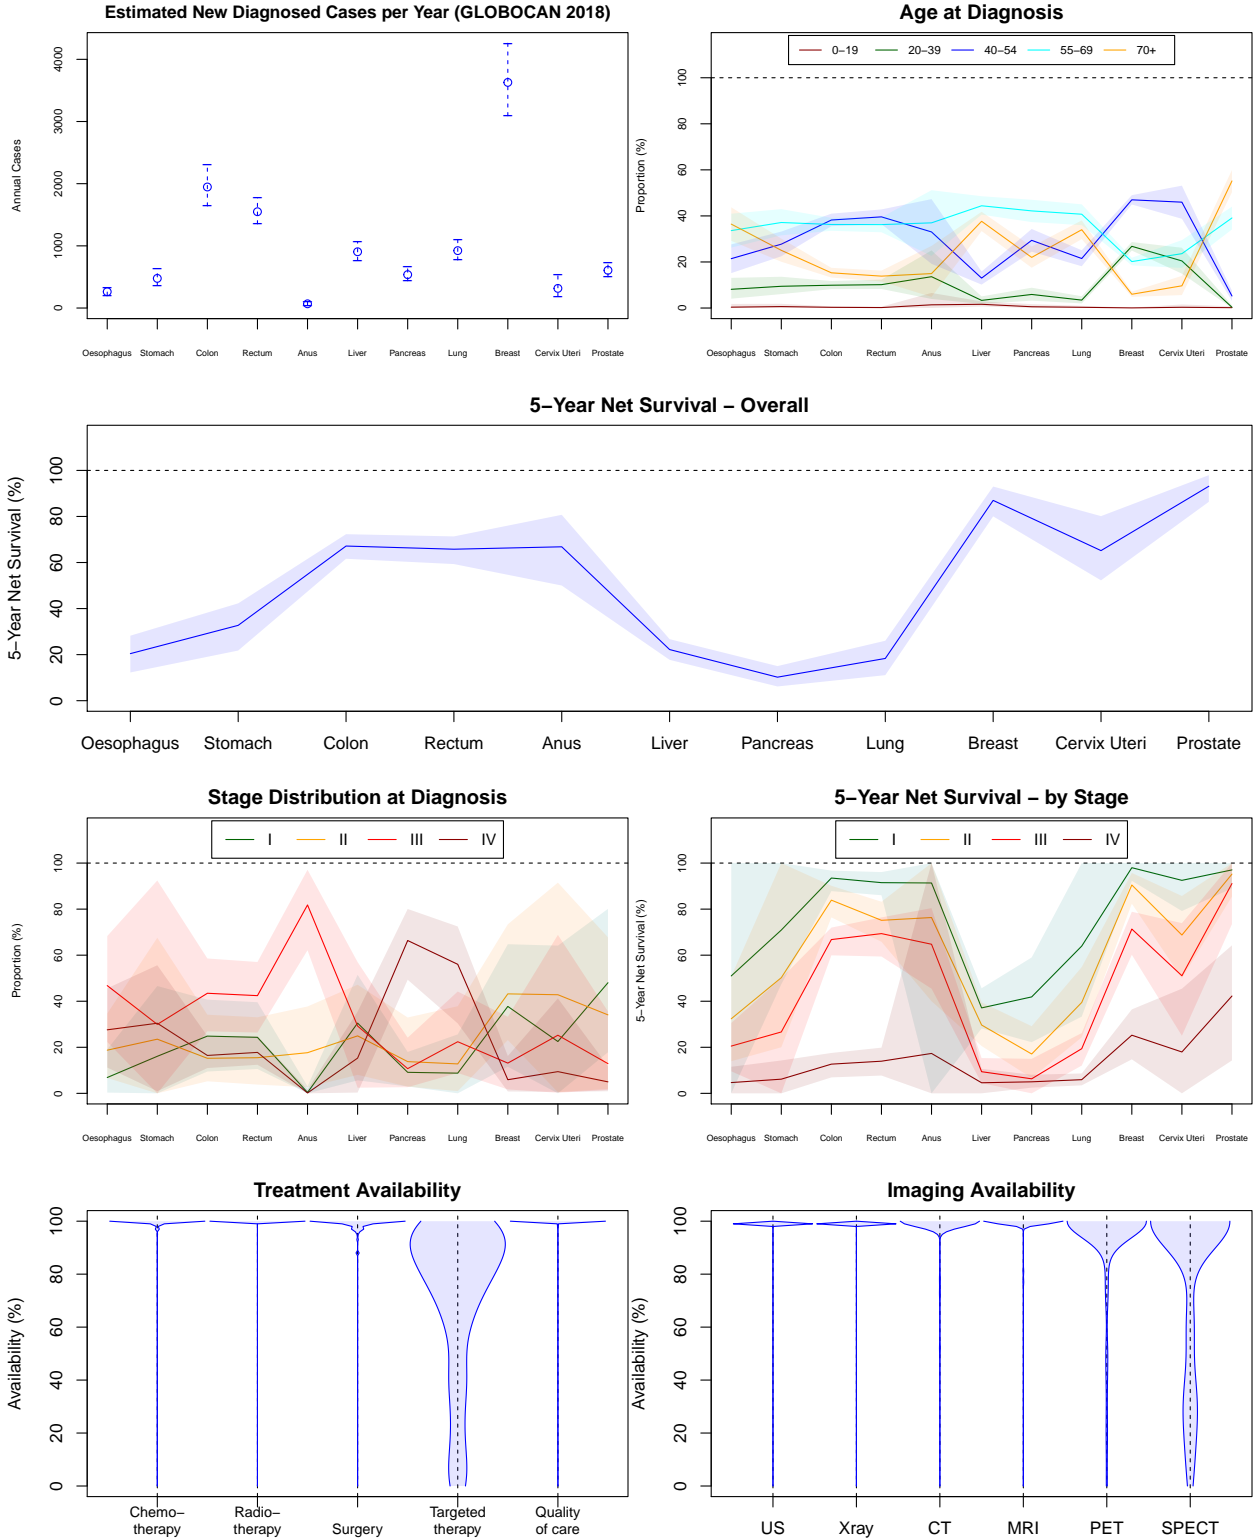

# Senegal

| ISO Code | Region         | Area   | Income Group |
|----------|----------------|--------|--------------|
| SEN      | Western Africa | Africa | Low income   |

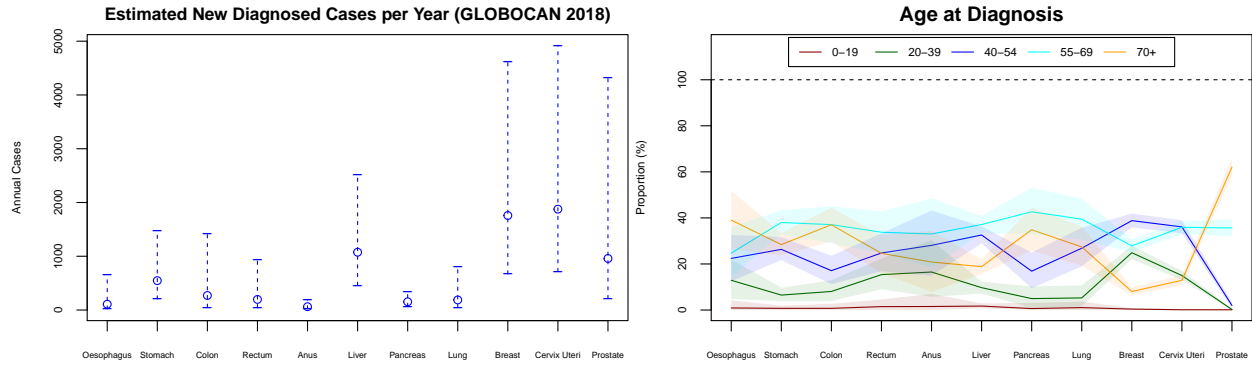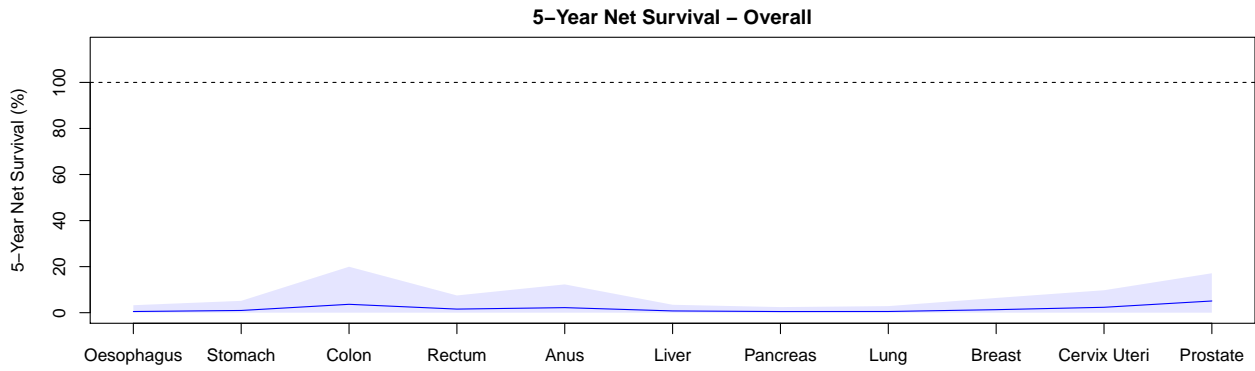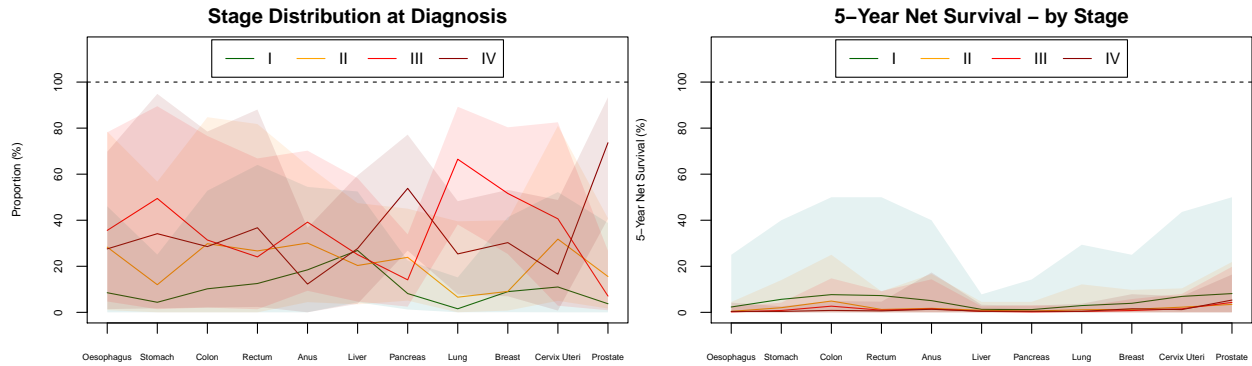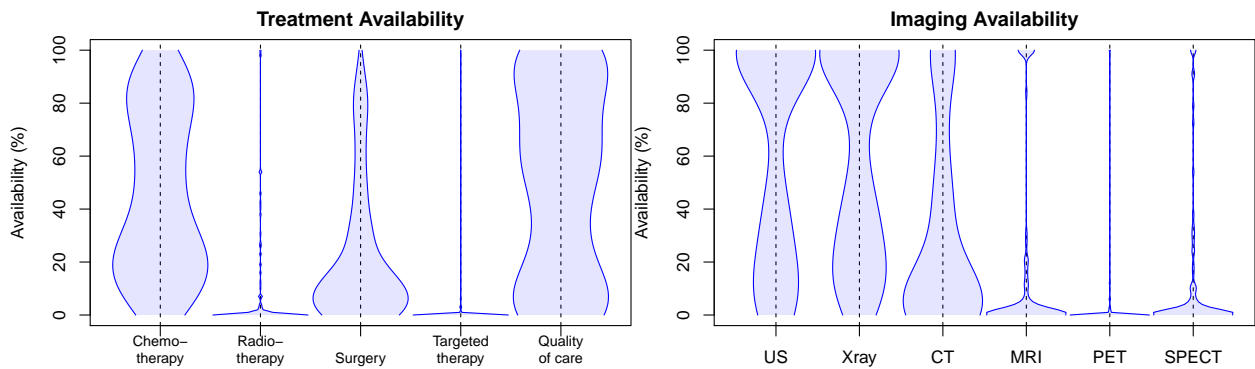

# Serbia

| ISO Code | Region          | Area   | Income Group        |
|----------|-----------------|--------|---------------------|
| SRB      | Southern Europe | Europe | Upper middle income |

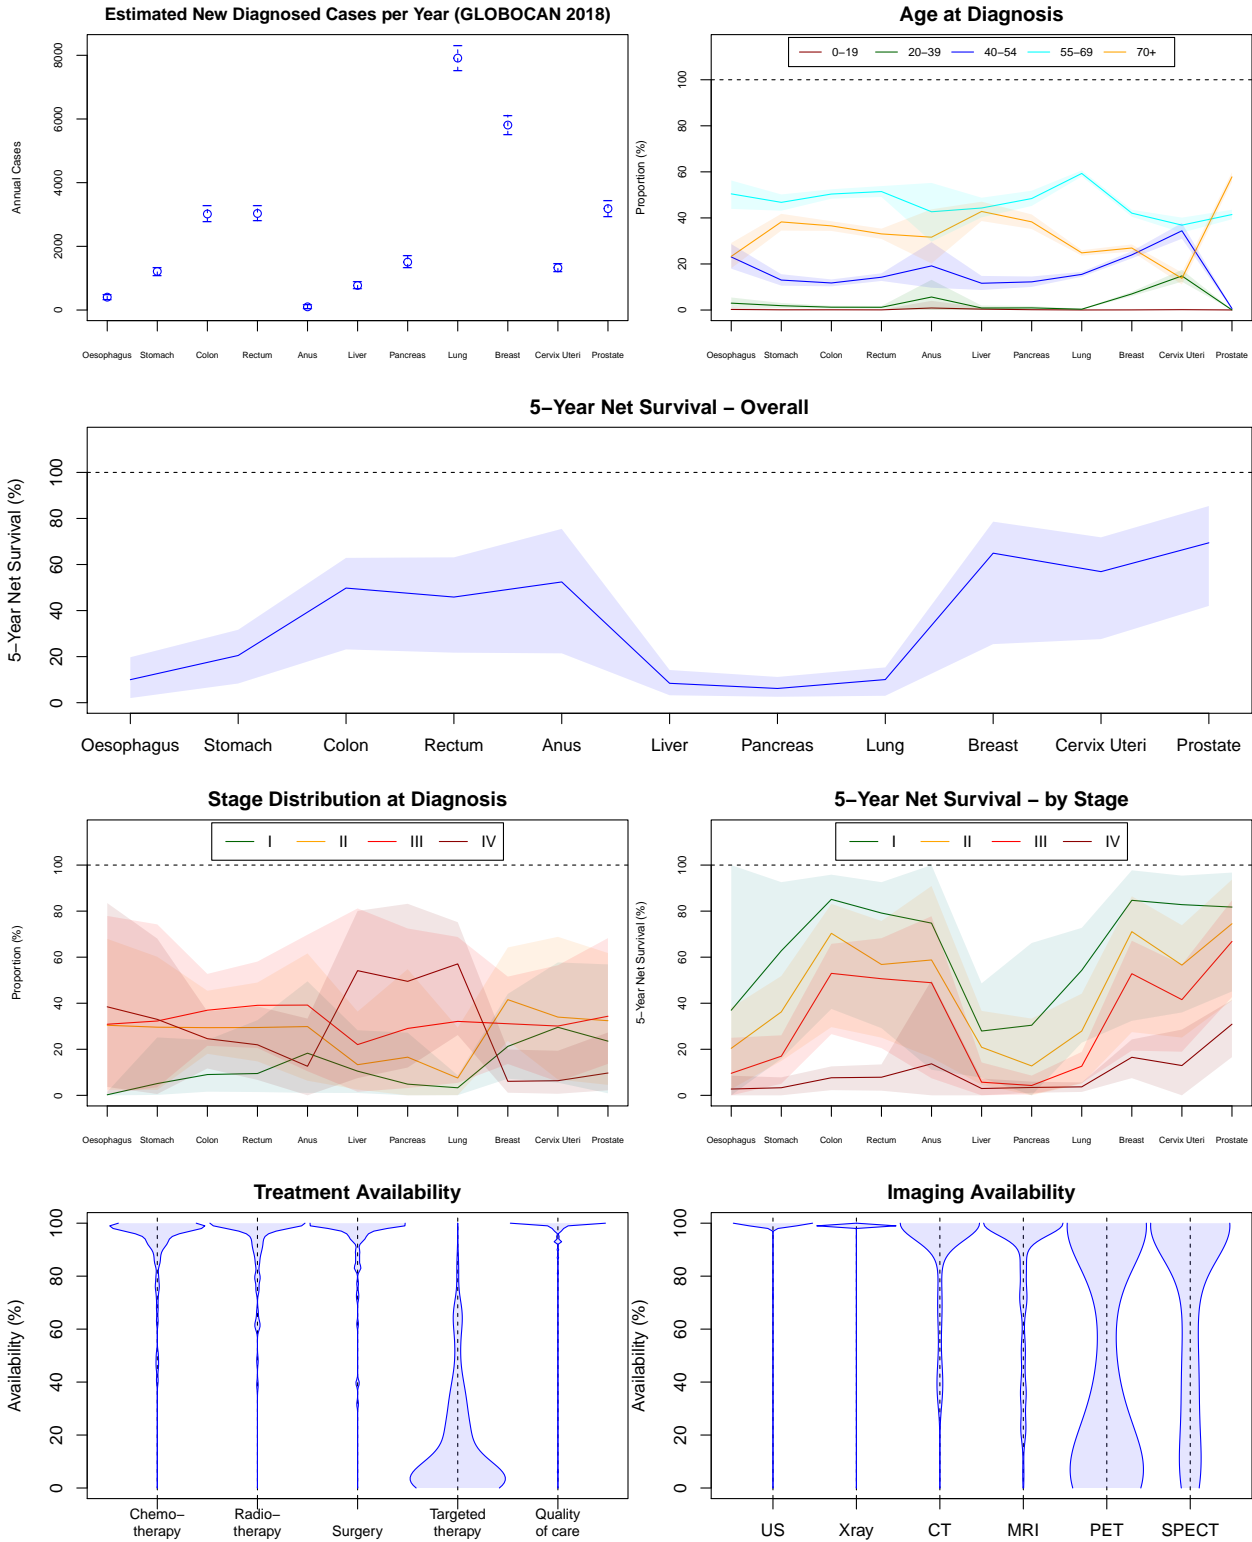

# Seychelles

| ISO Code | Region         | Area   | Income Group |
|----------|----------------|--------|--------------|
| SYC      | Eastern Africa | Africa | High income  |

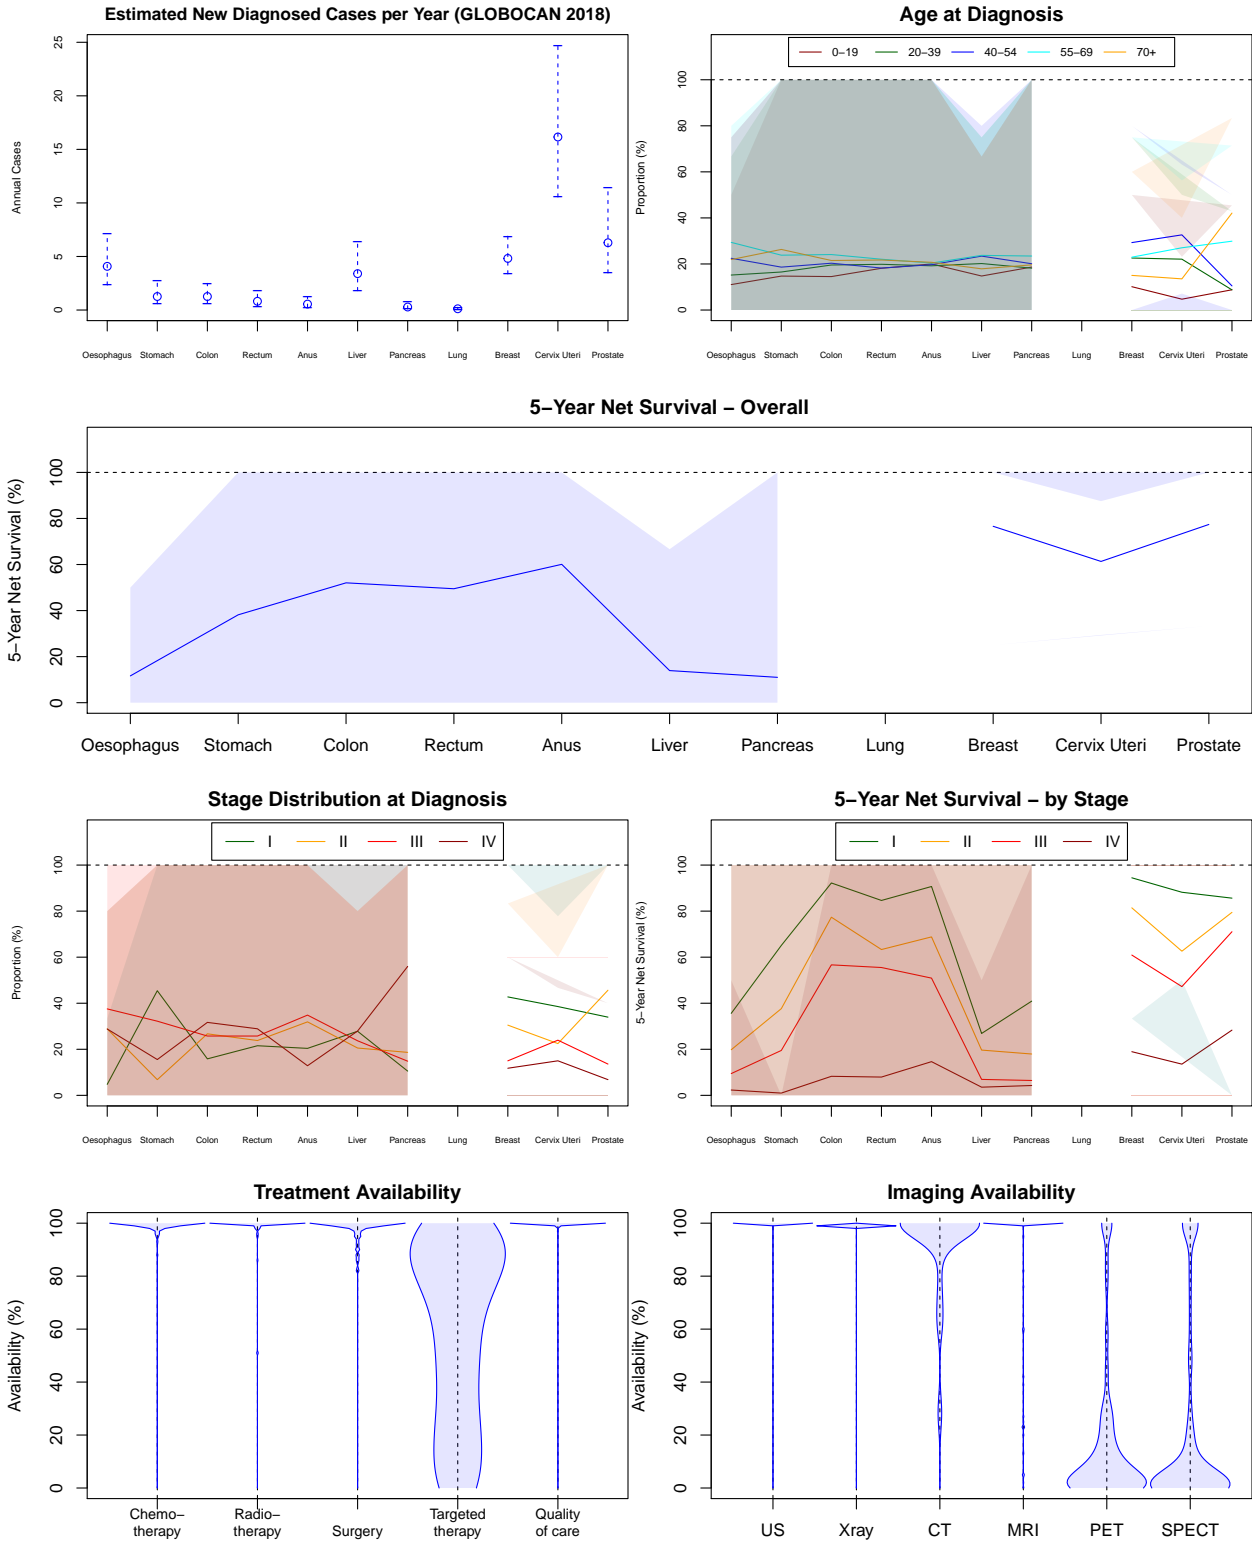

# Sierra Leone

| ISO Code | Region         | Area   | Income Group |
|----------|----------------|--------|--------------|
| SLE      | Western Africa | Africa | Low income   |

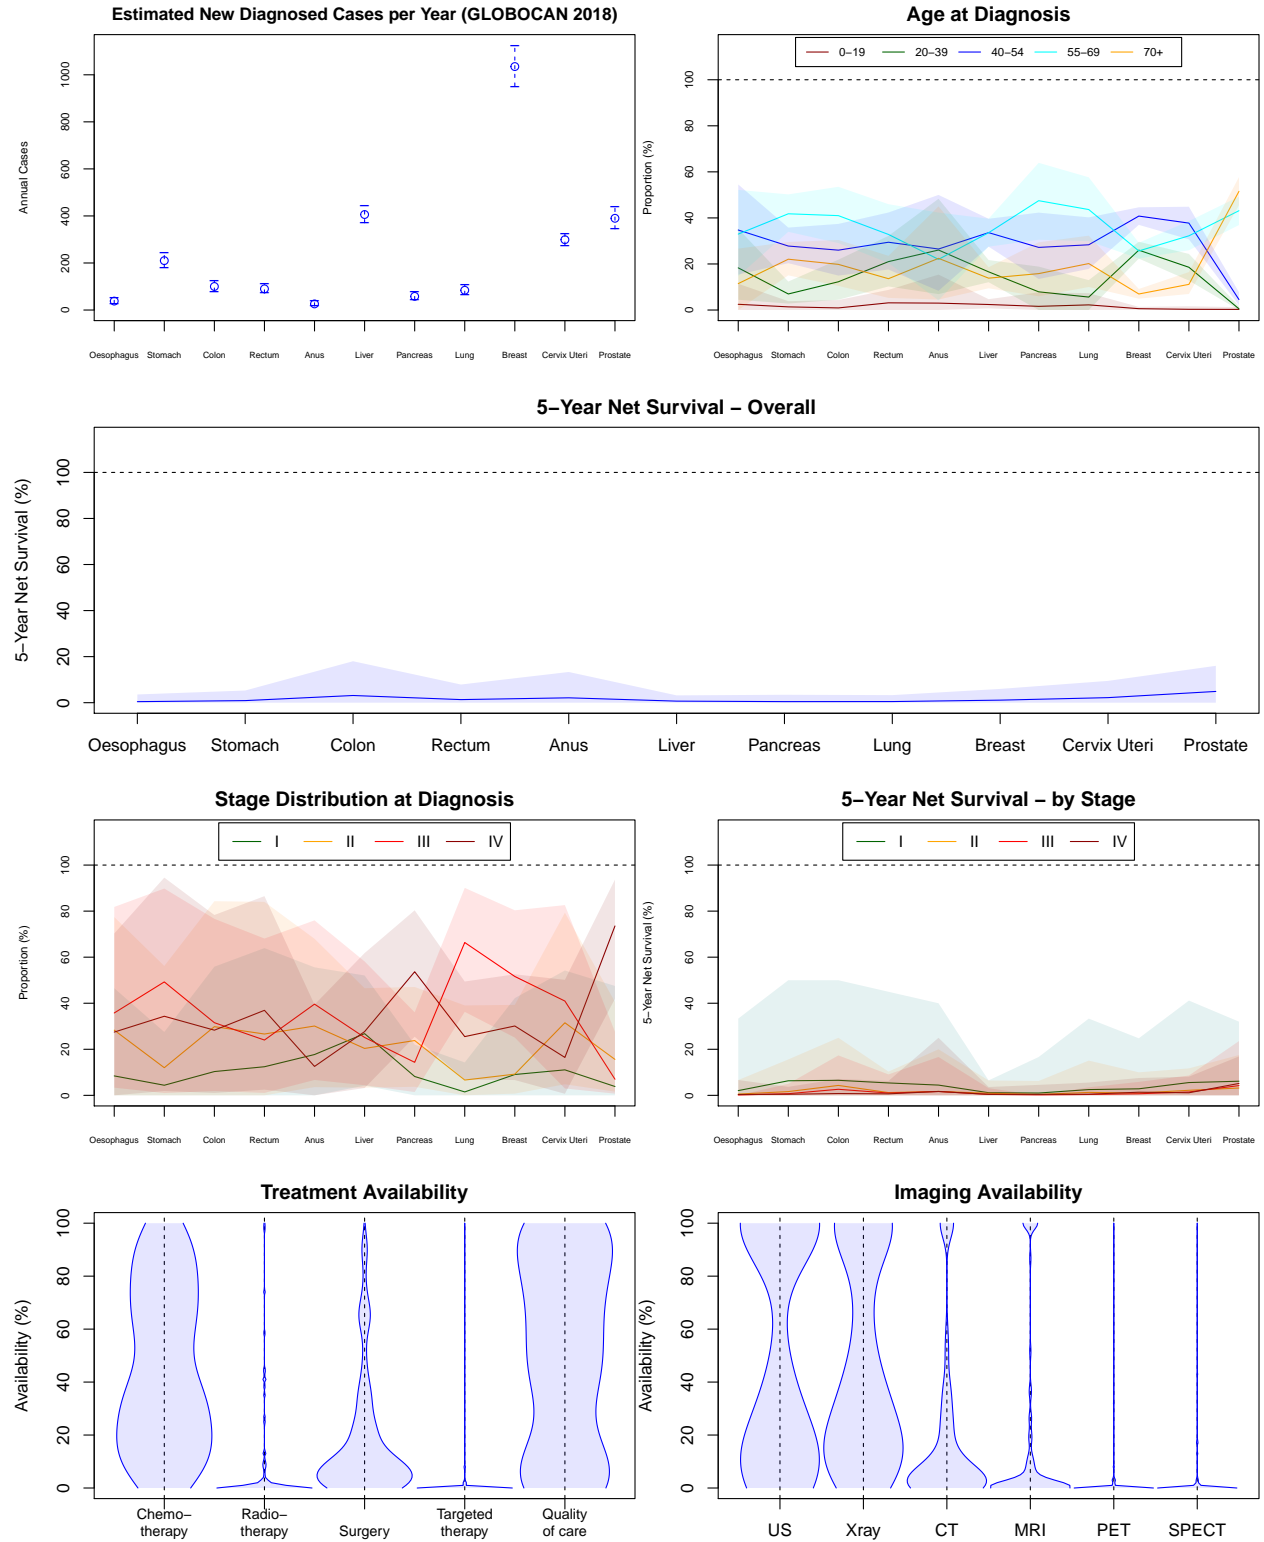

# Singapore

| ISO Code | Region             | Area | Income Group |
|----------|--------------------|------|--------------|
| SGP      | South-Eastern Asia | Asia | High income  |

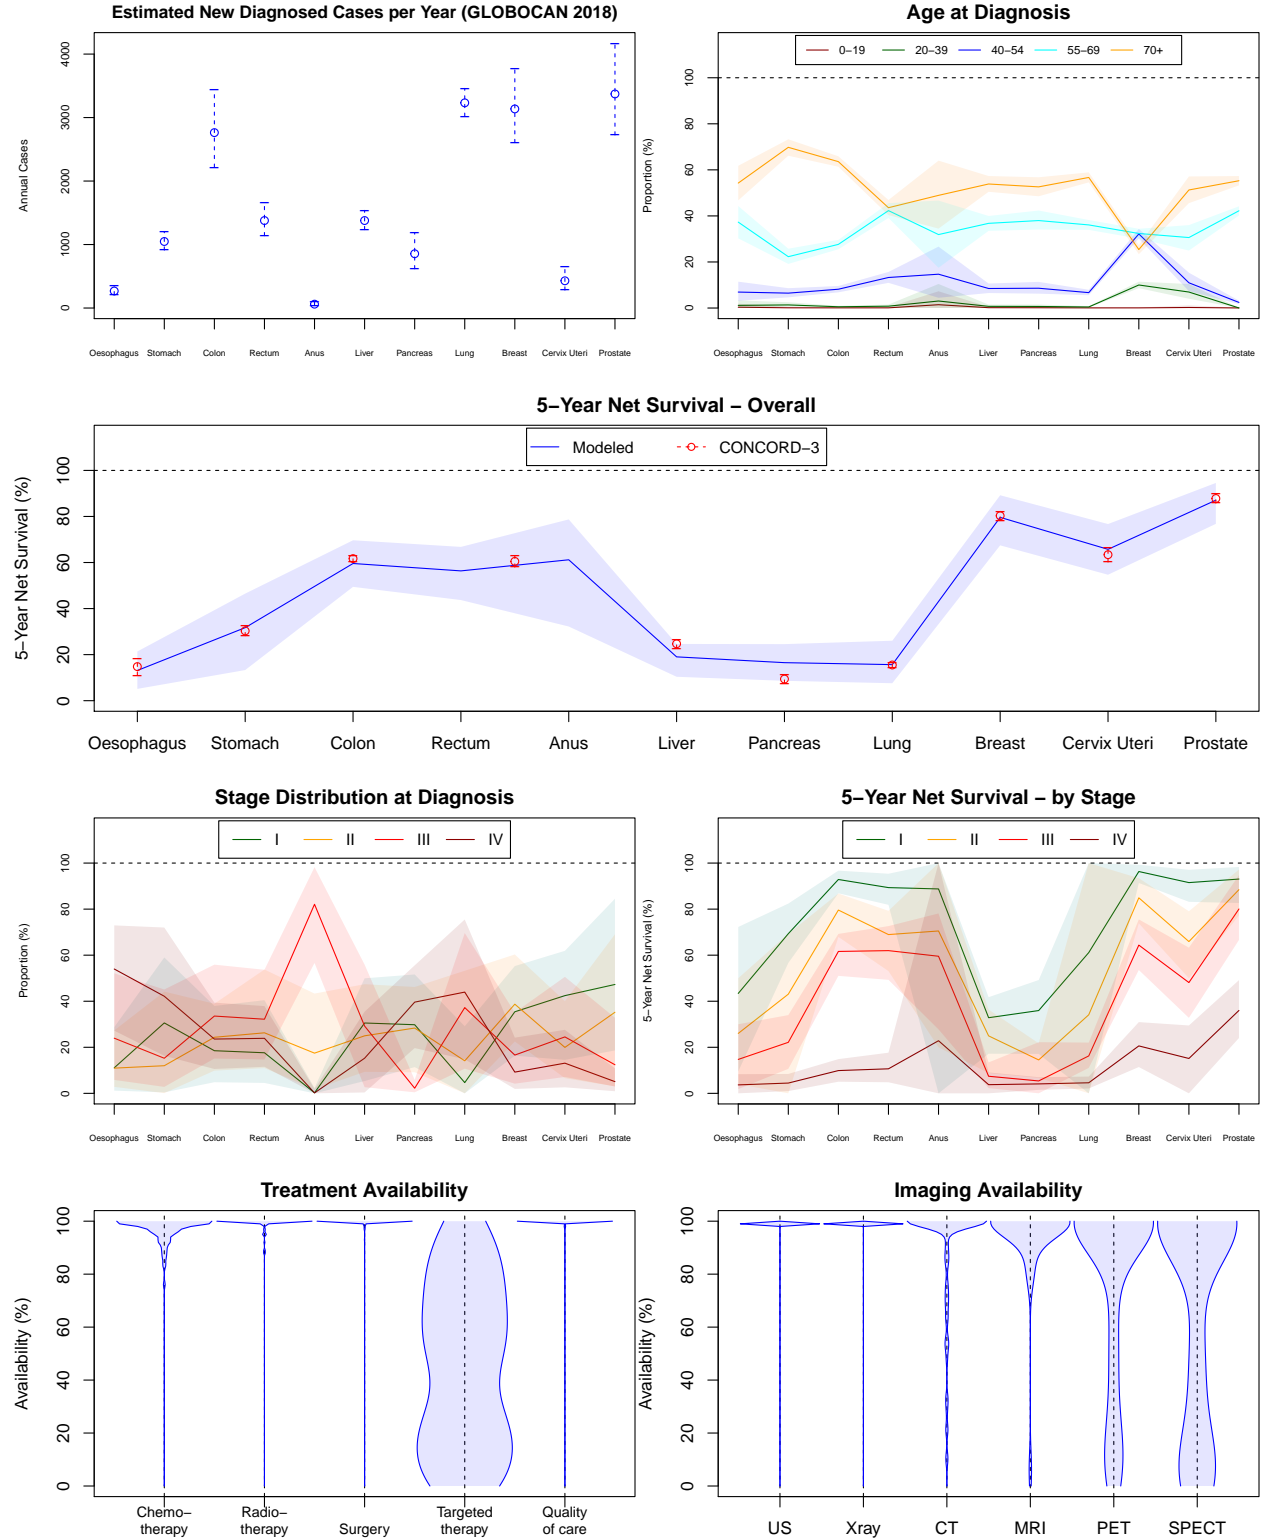

# Slovakia

| ISO Code | Region         | Area   | Income Group |
|----------|----------------|--------|--------------|
| SVK      | Eastern Europe | Europe | High income  |

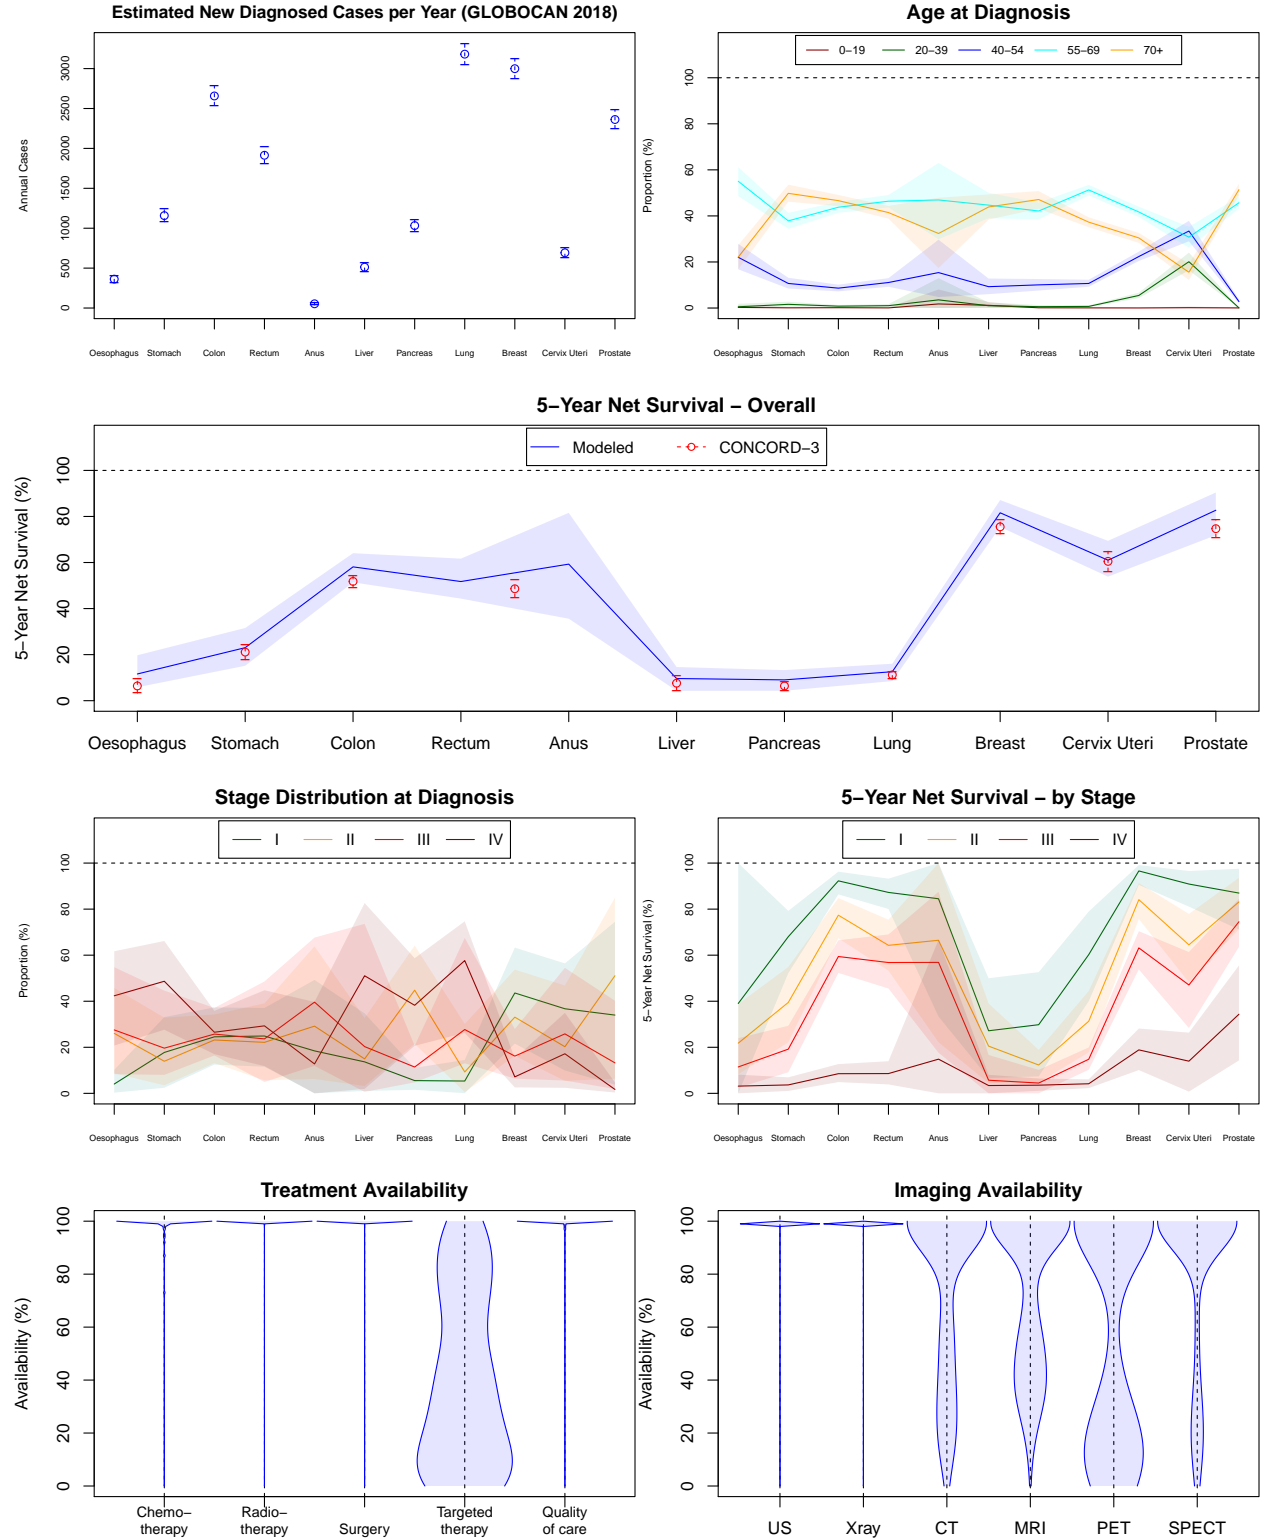



# Slovenia

| ISO Code | Region          | Area   | Income Group |
|----------|-----------------|--------|--------------|
| SVN      | Southern Europe | Europe | High income  |

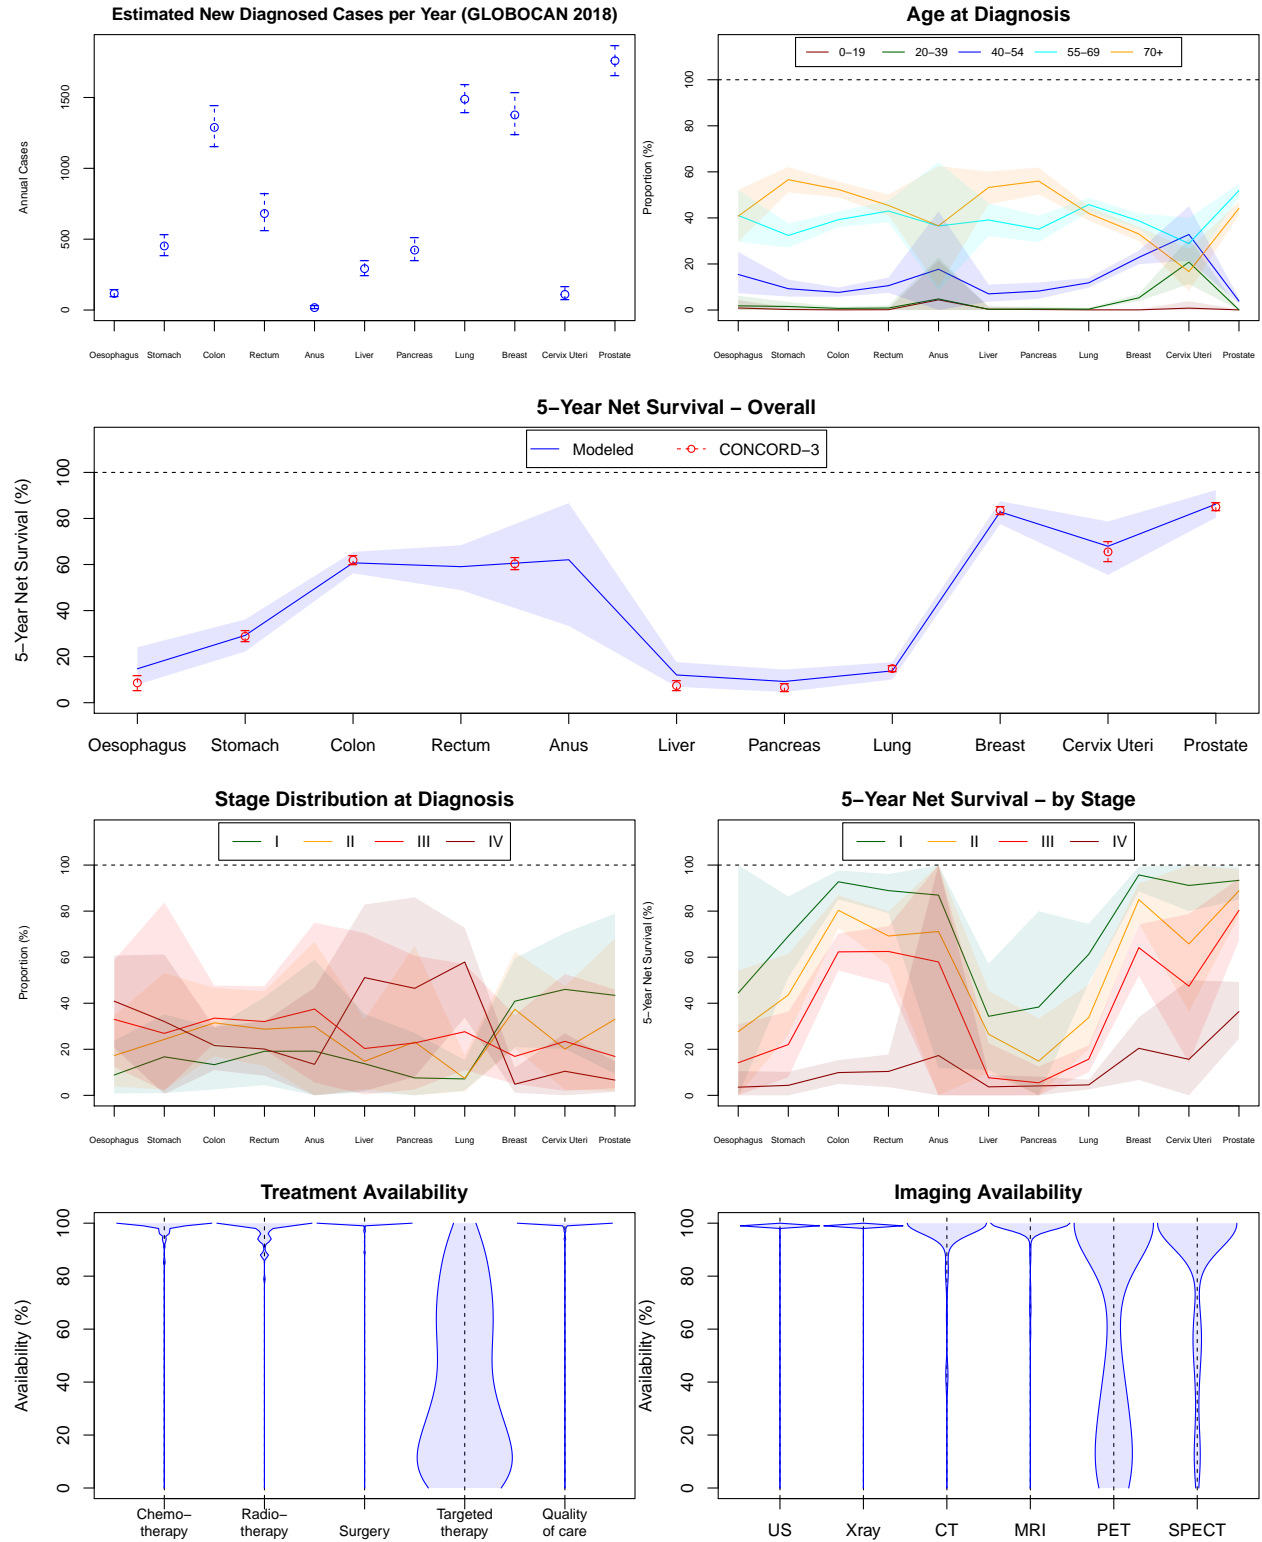

# Solomon Islands

| ISO Code | Region    | Area    | Income Group        |
|----------|-----------|---------|---------------------|
| SLB      | Melanesia | Oceania | Lower middle income |

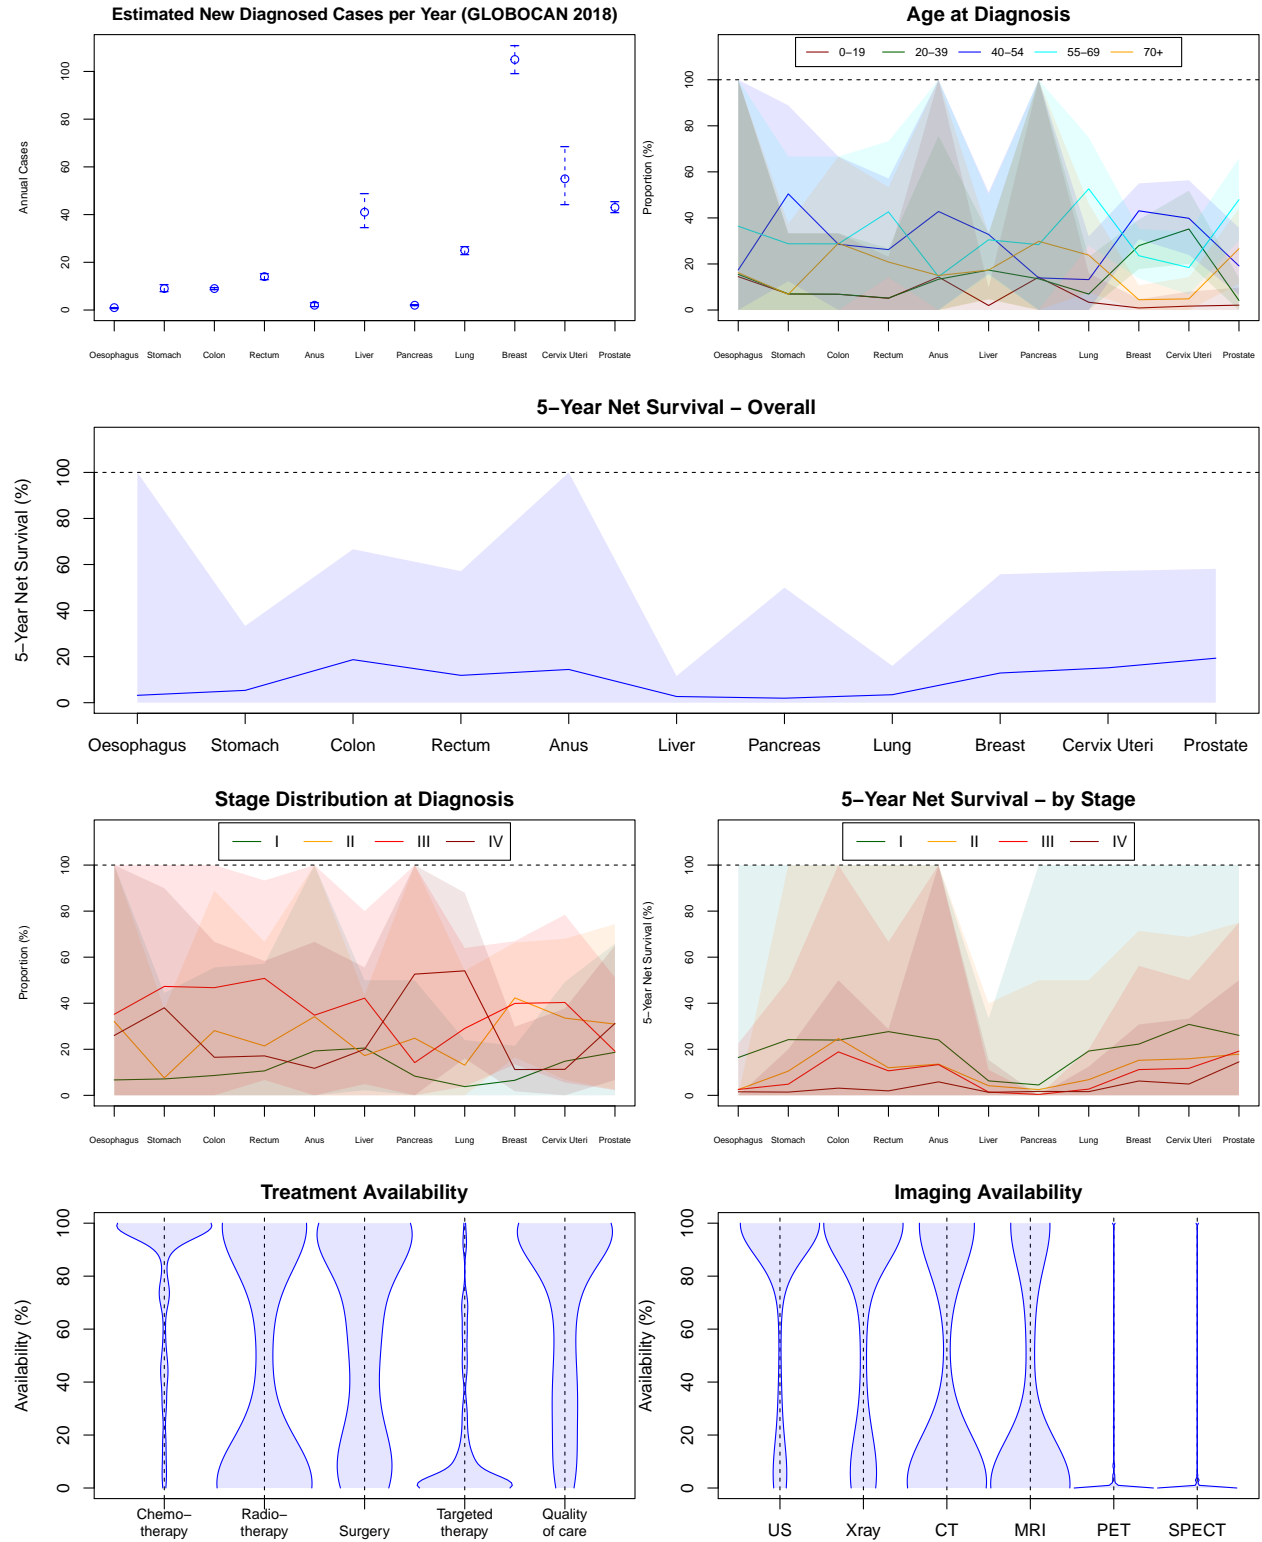

# Somalia

| ISO Code | Region         | Area   | Income Group |
|----------|----------------|--------|--------------|
| SOM      | Eastern Africa | Africa | Low income   |

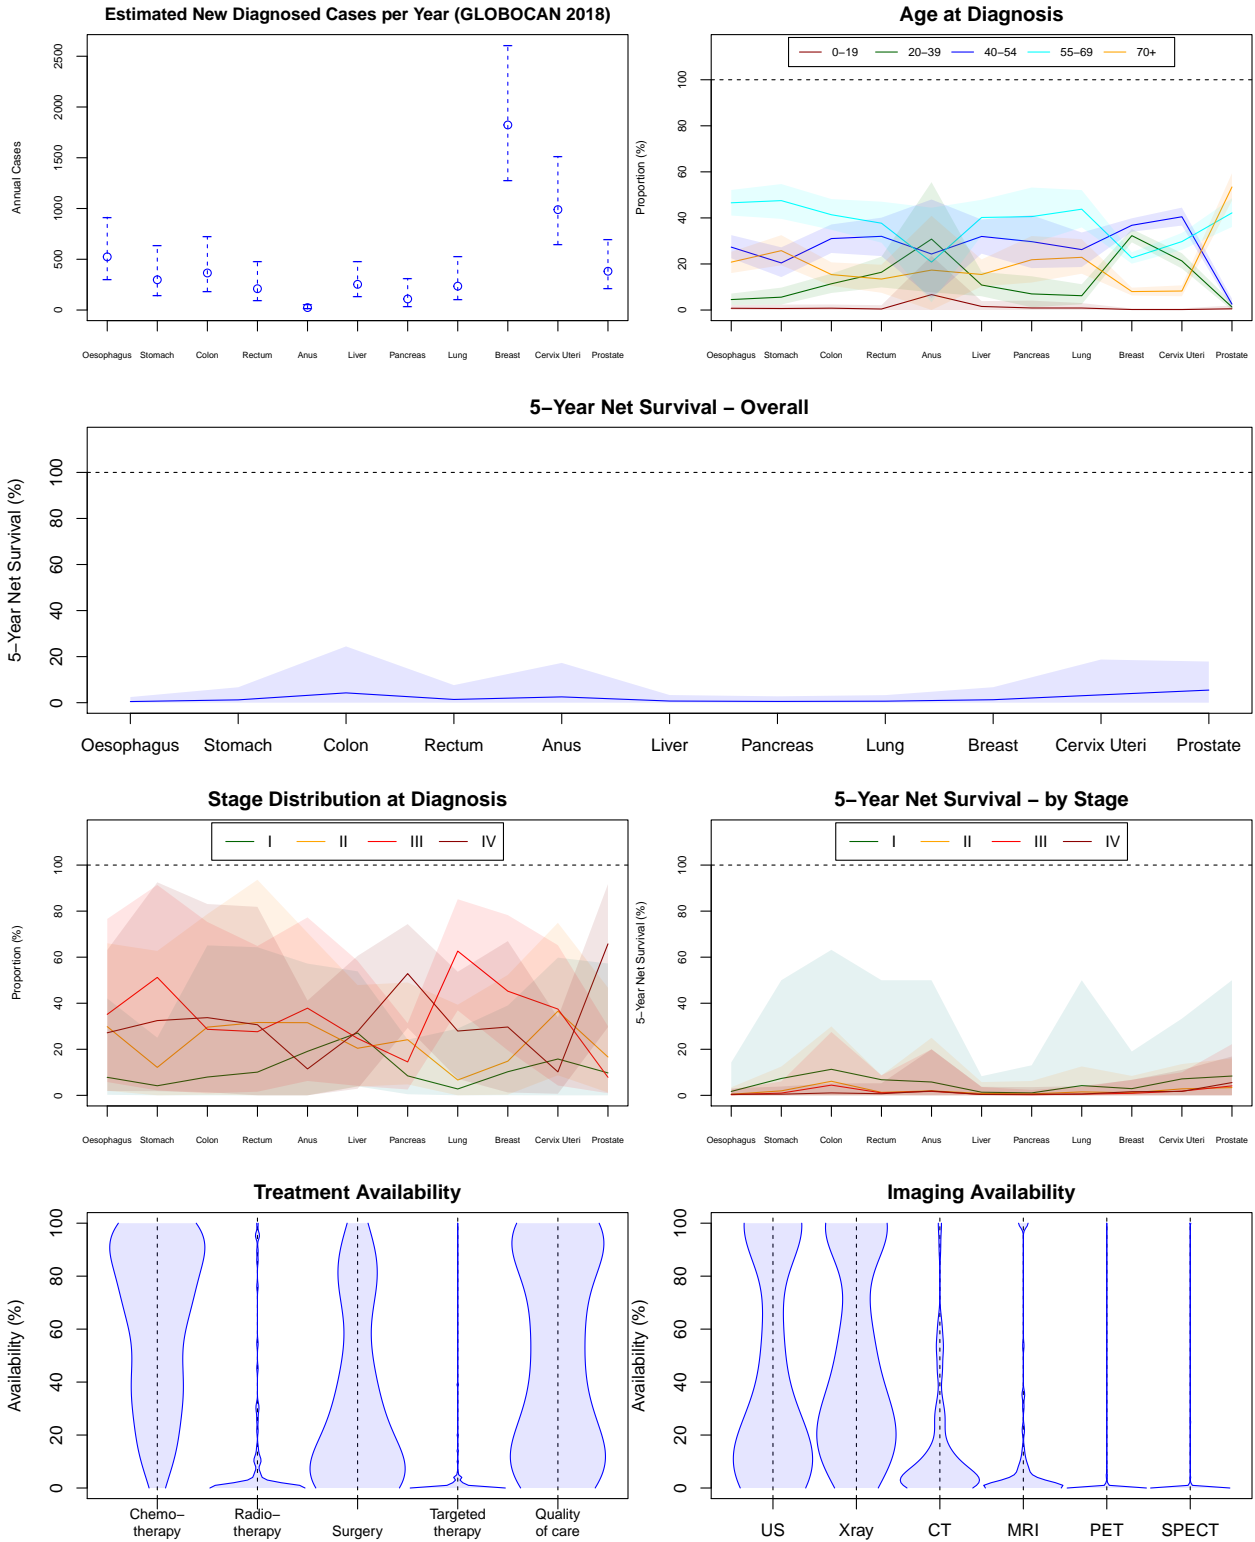

# South Africa

| ISO Code | Region          | Area   | Income Group        |
|----------|-----------------|--------|---------------------|
| ZAF      | Southern Africa | Africa | Upper middle income |

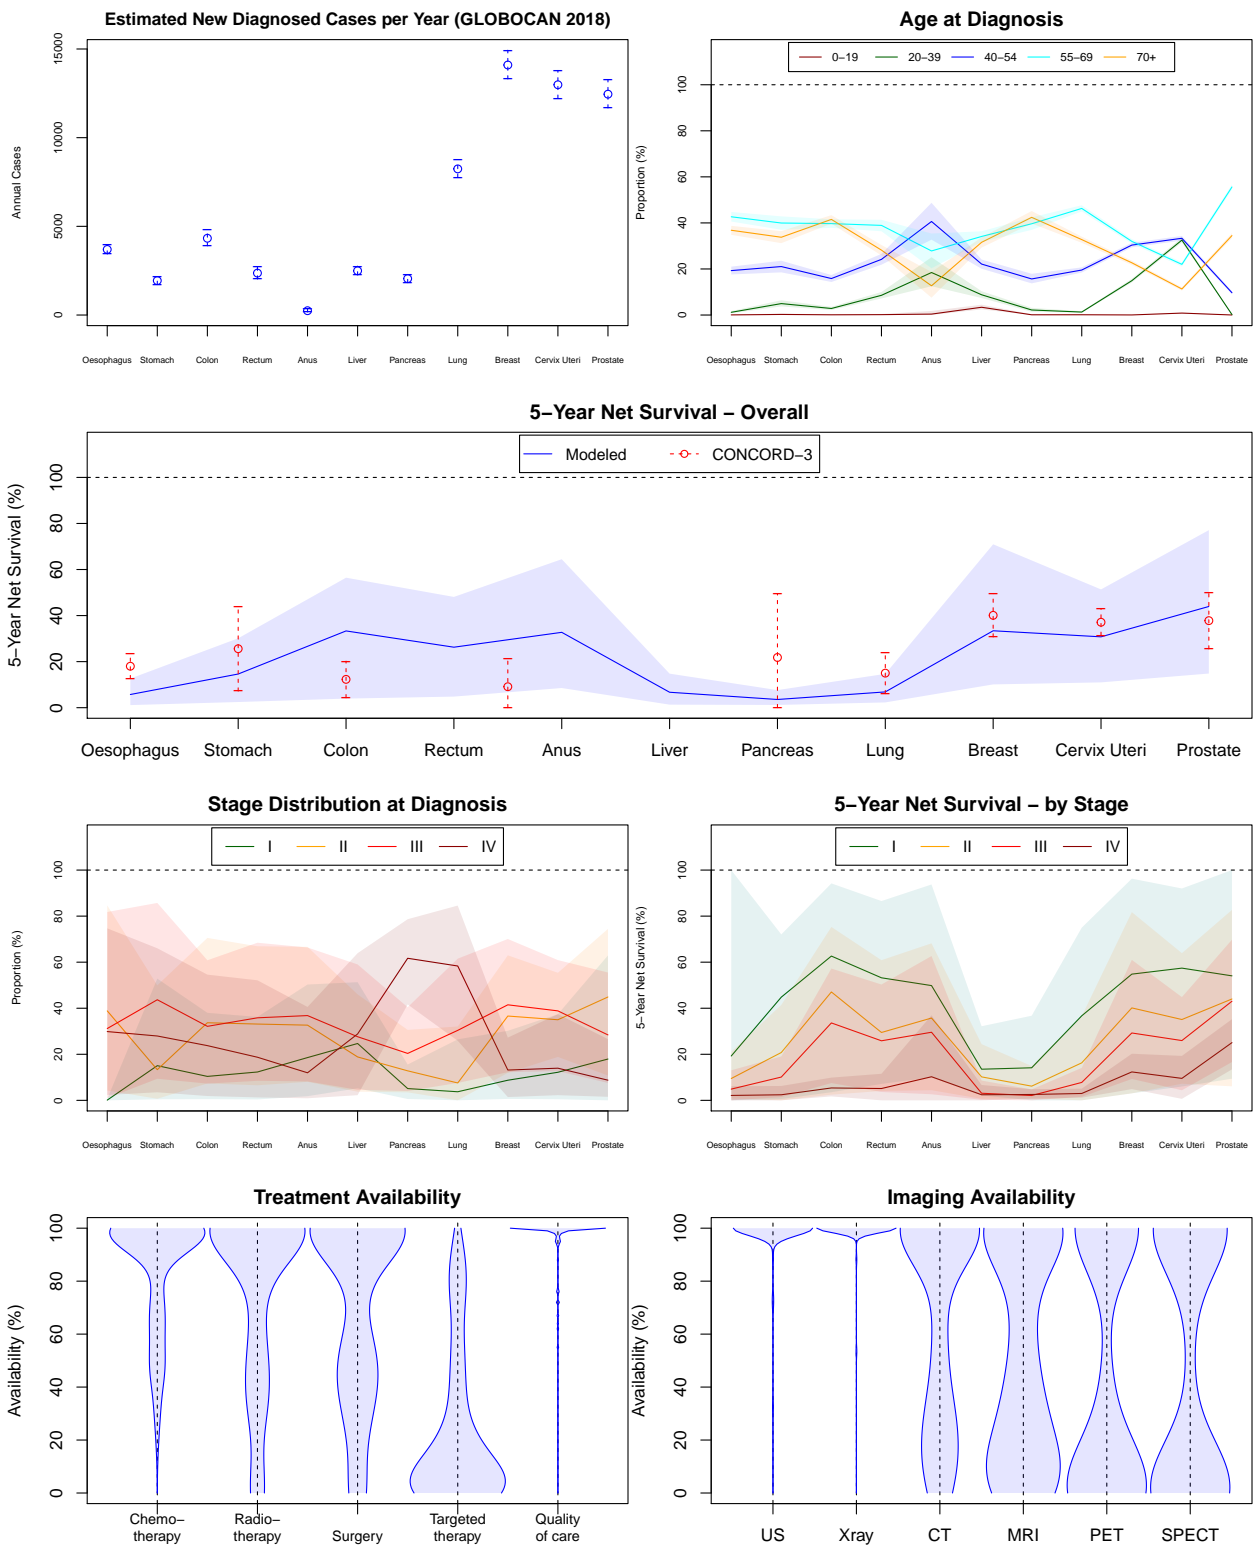

# South Sudan

| ISO Code | Region         | Area   | Income Group |
|----------|----------------|--------|--------------|
| SSD      | Eastern Africa | Africa | Low income   |

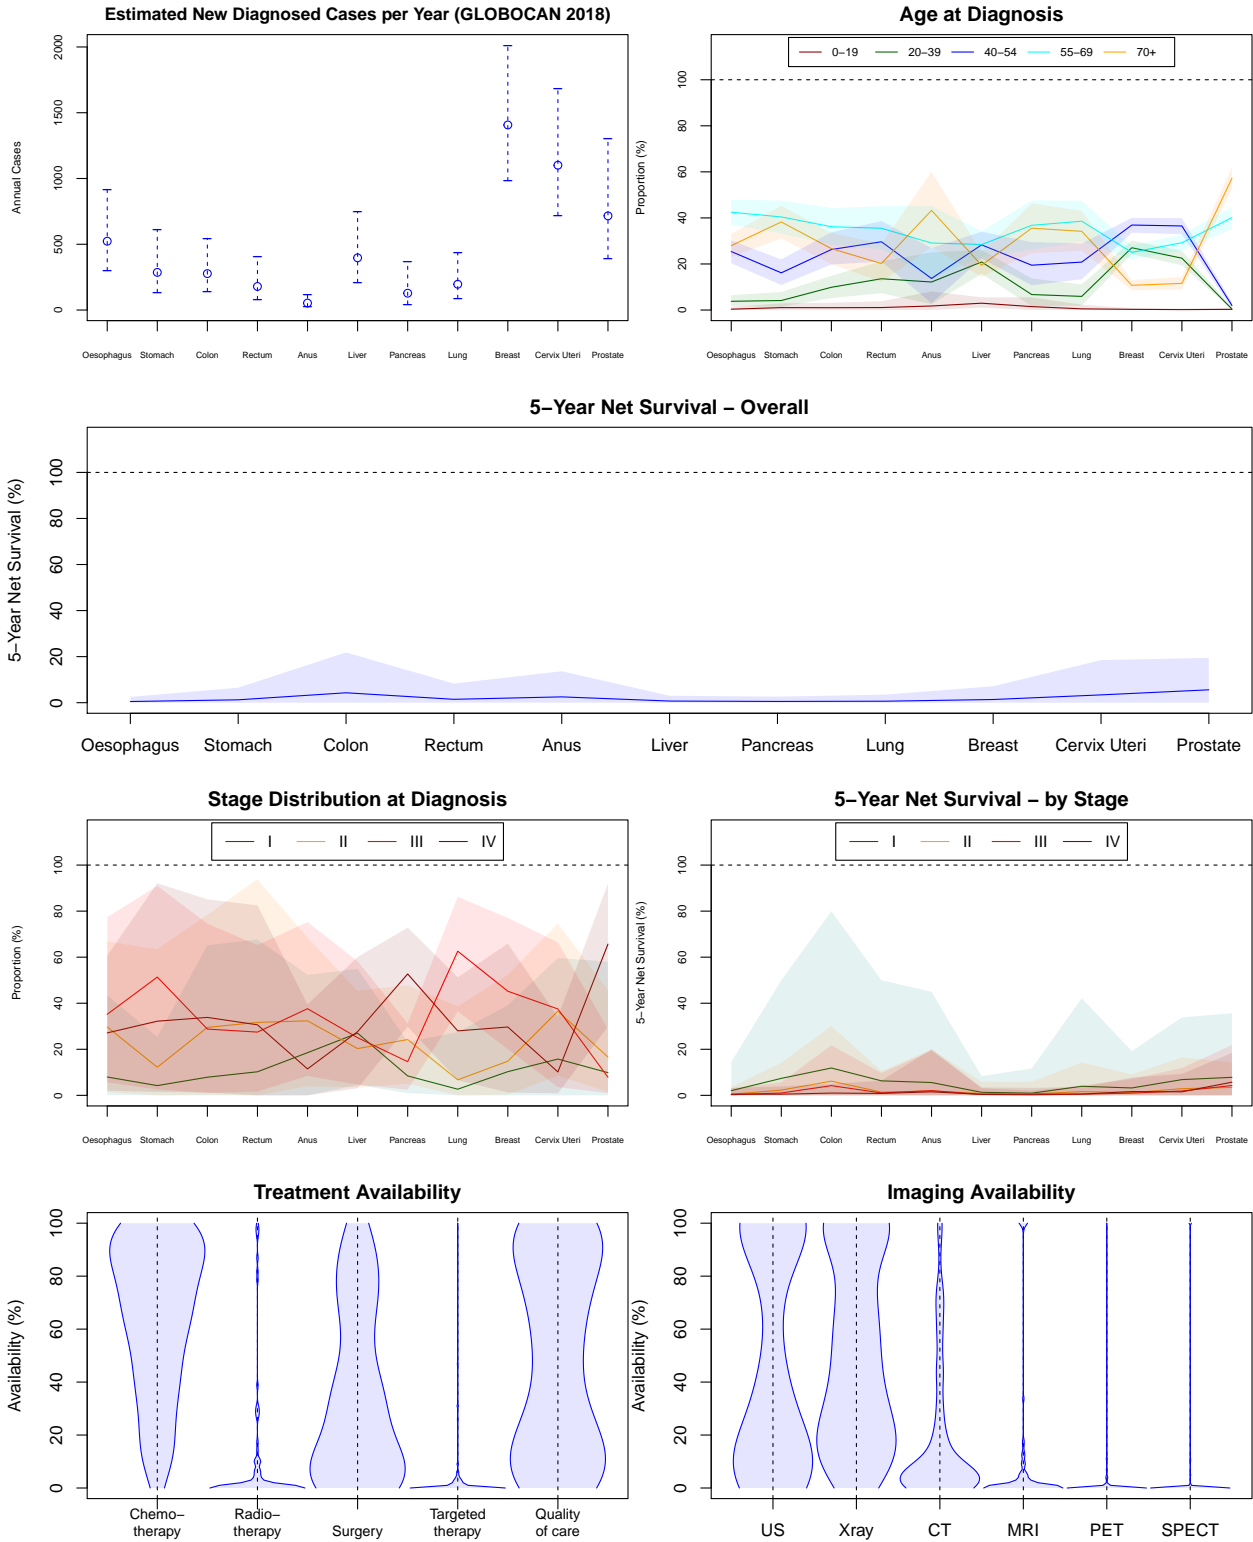

# Spain

| ISO Code | Region          | Area   | Income Group |
|----------|-----------------|--------|--------------|
| ESP      | Southern Europe | Europe | High income  |

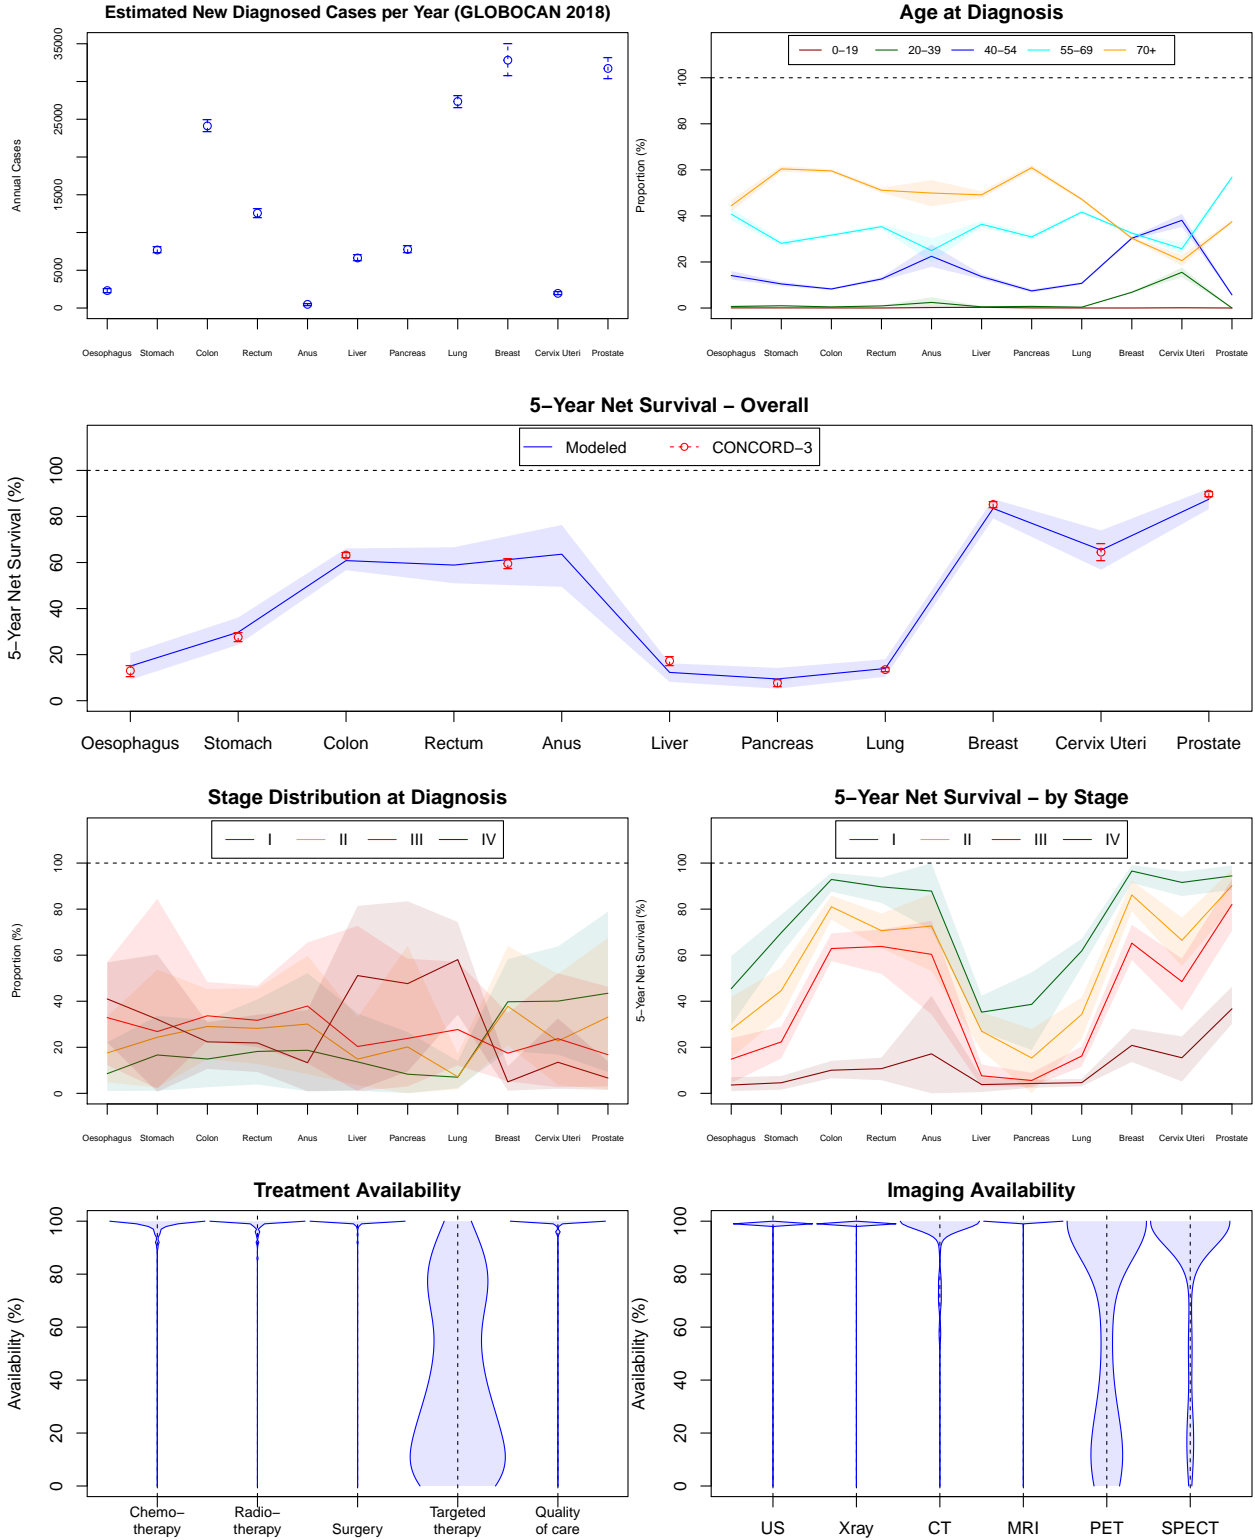

# Sri Lanka

| ISO Code | Region        | Area | Income Group        |
|----------|---------------|------|---------------------|
| LKA      | Southern Asia | Asia | Lower middle income |

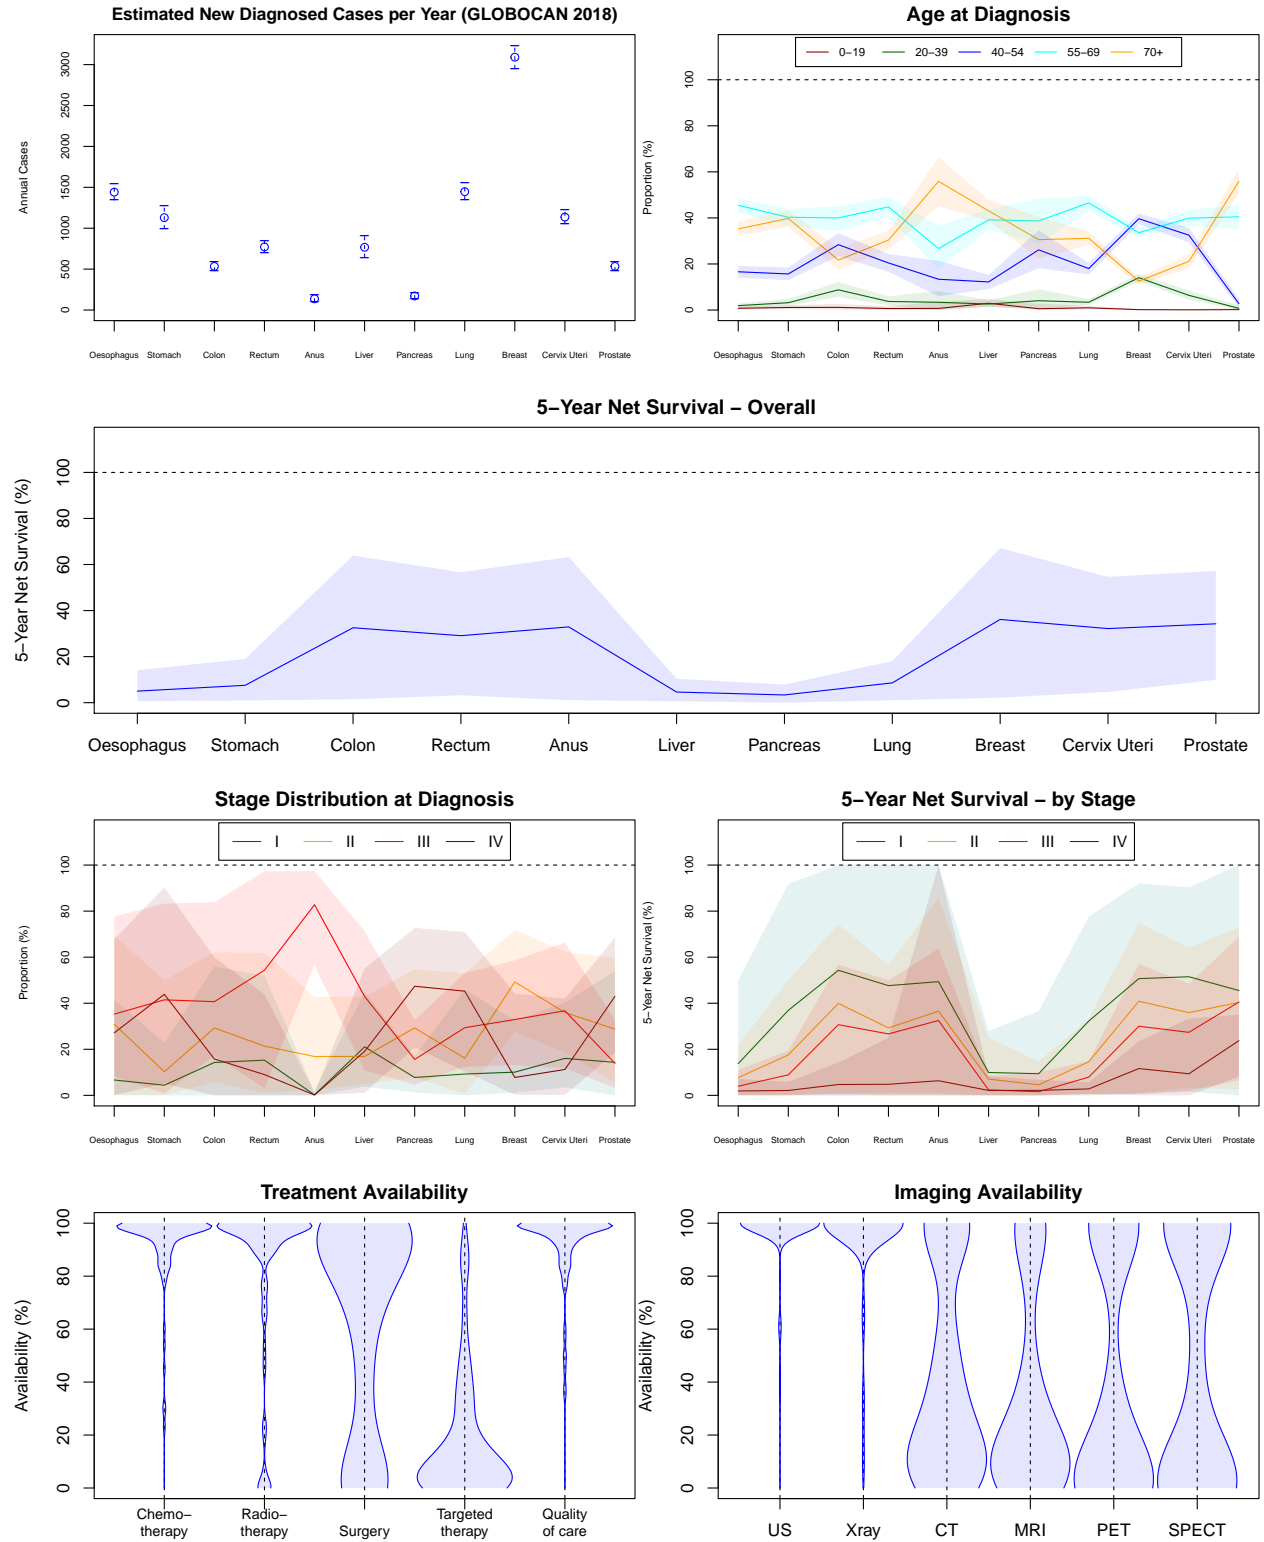

# State of Palestine

| ISO Code | Region       | Area | Income Group        |
|----------|--------------|------|---------------------|
| PSE      | Western Asia | Asia | Lower middle income |

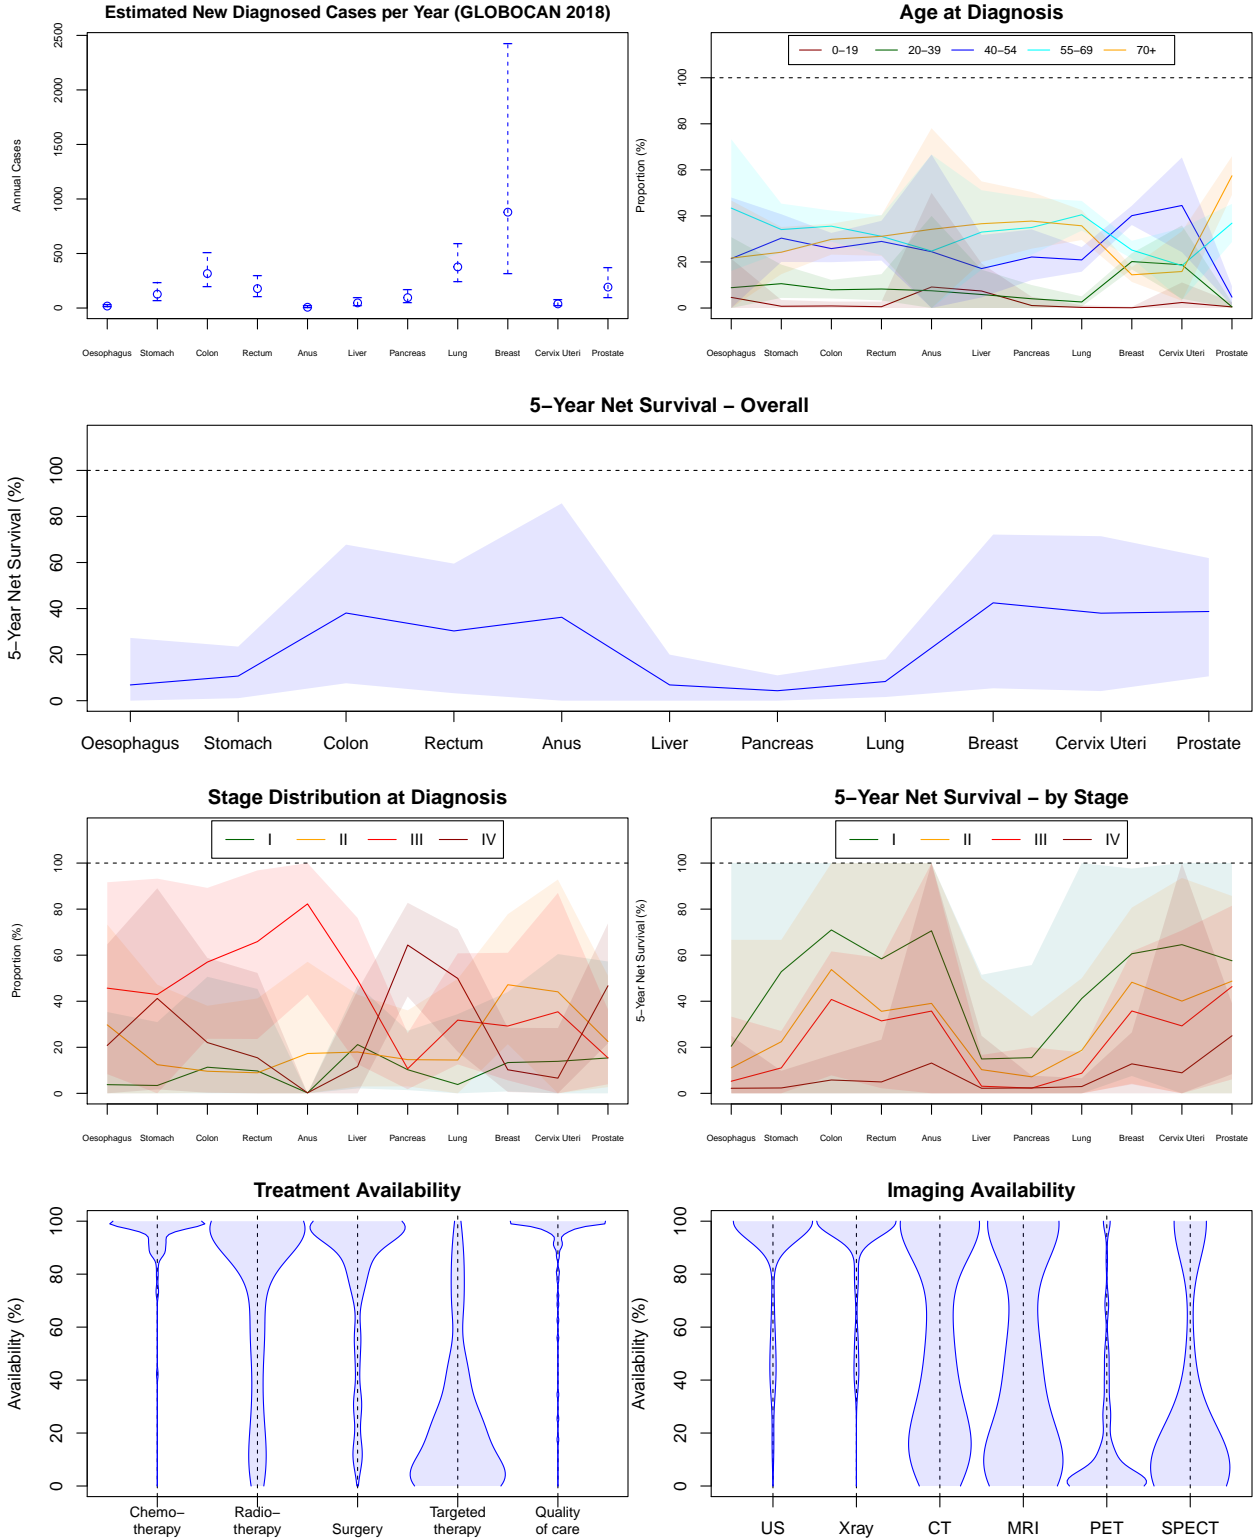



# Sudan

| ISO Code | Region          | Area   | Income Group        |
|----------|-----------------|--------|---------------------|
| SDN      | Northern Africa | Africa | Lower middle income |

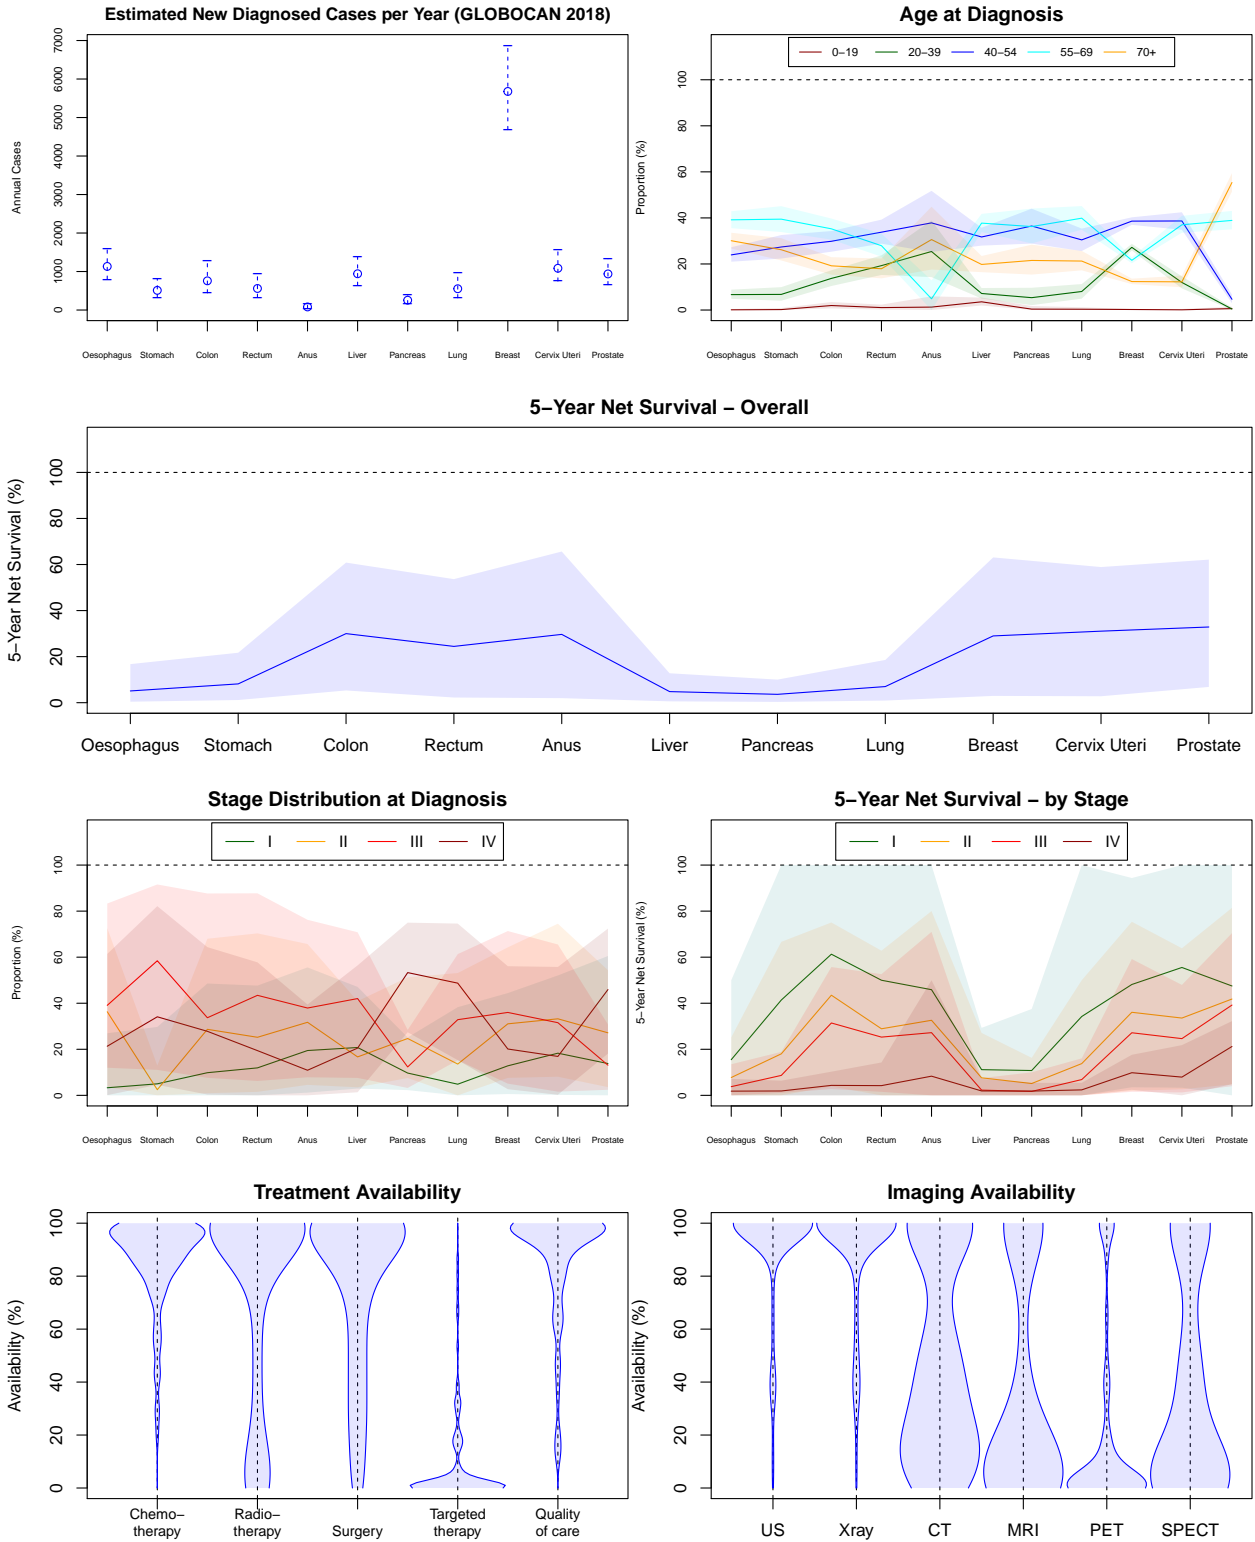

# Suriname

| ISO Code | Region        | Area                            | Income Group        |
|----------|---------------|---------------------------------|---------------------|
| SUR      | South America | Latin America and the Caribbean | Upper middle income |

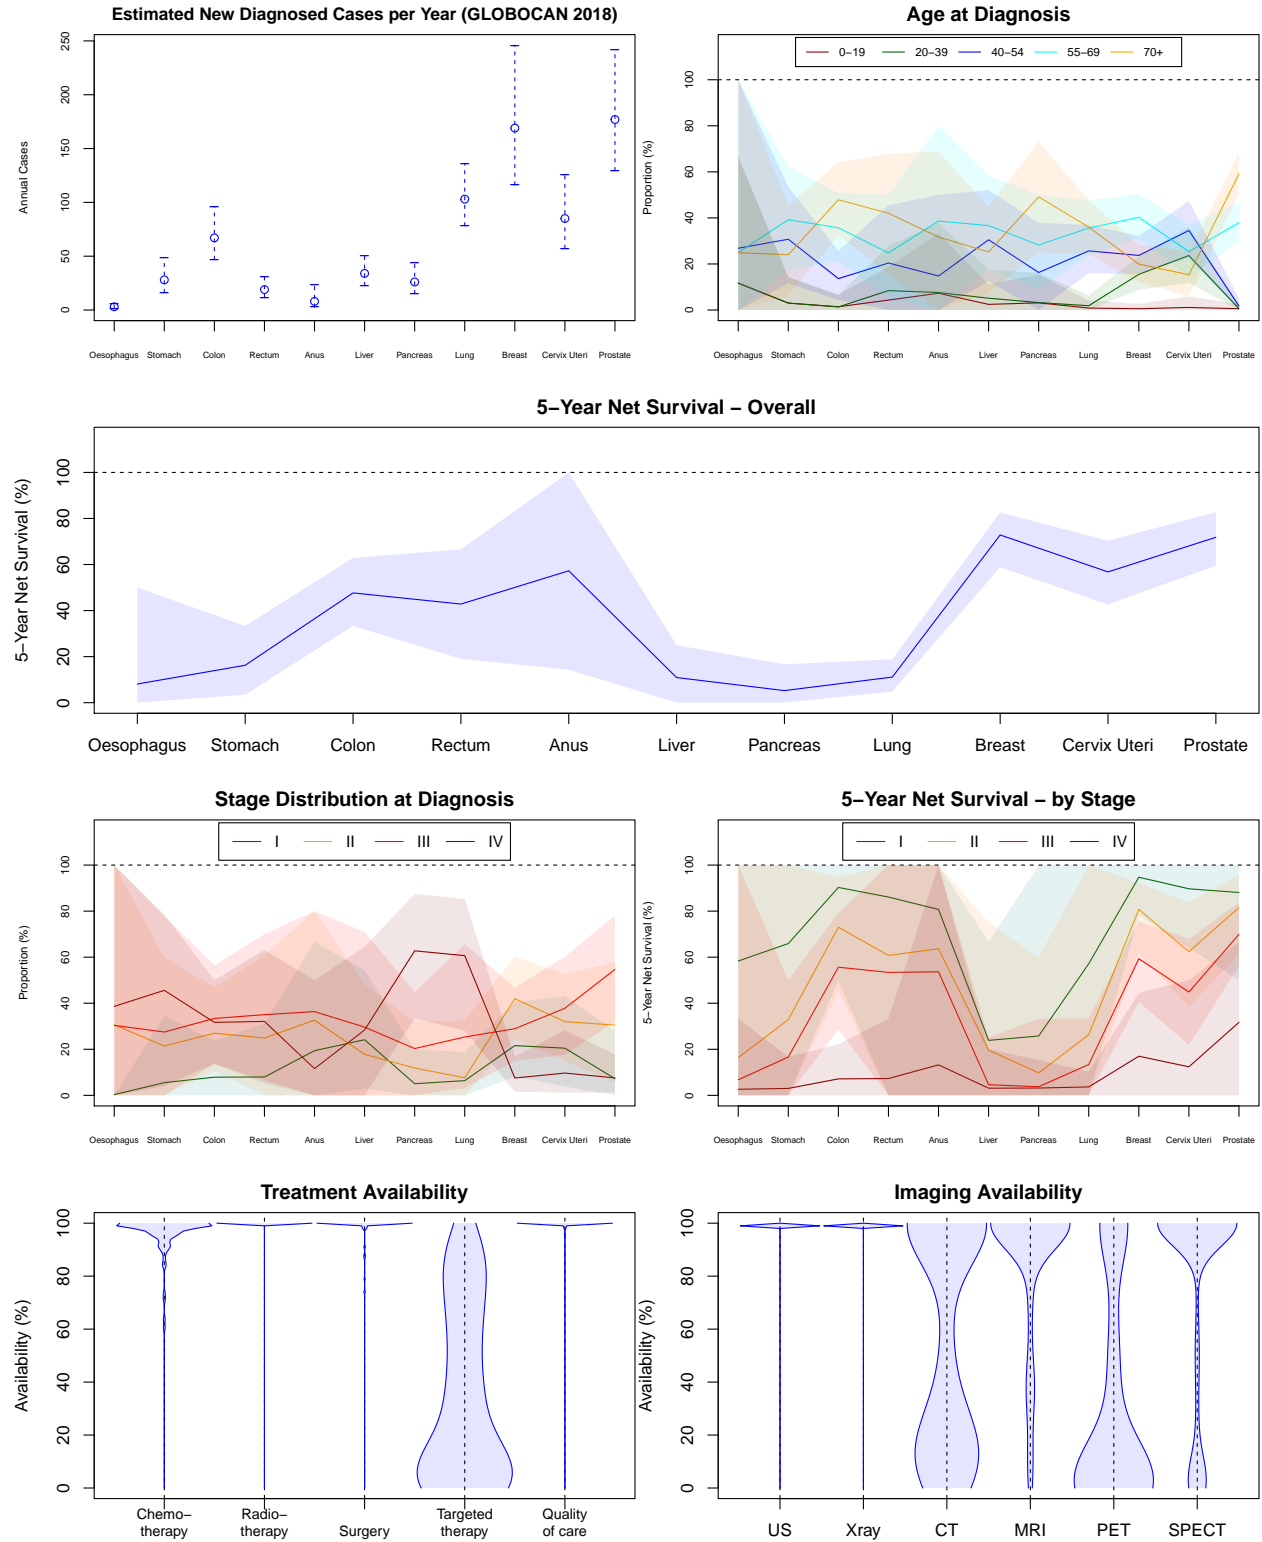

# Sweden

| ISO Code | Region          | Area   | Income Group |
|----------|-----------------|--------|--------------|
| SWE      | Northern Europe | Europe | High income  |

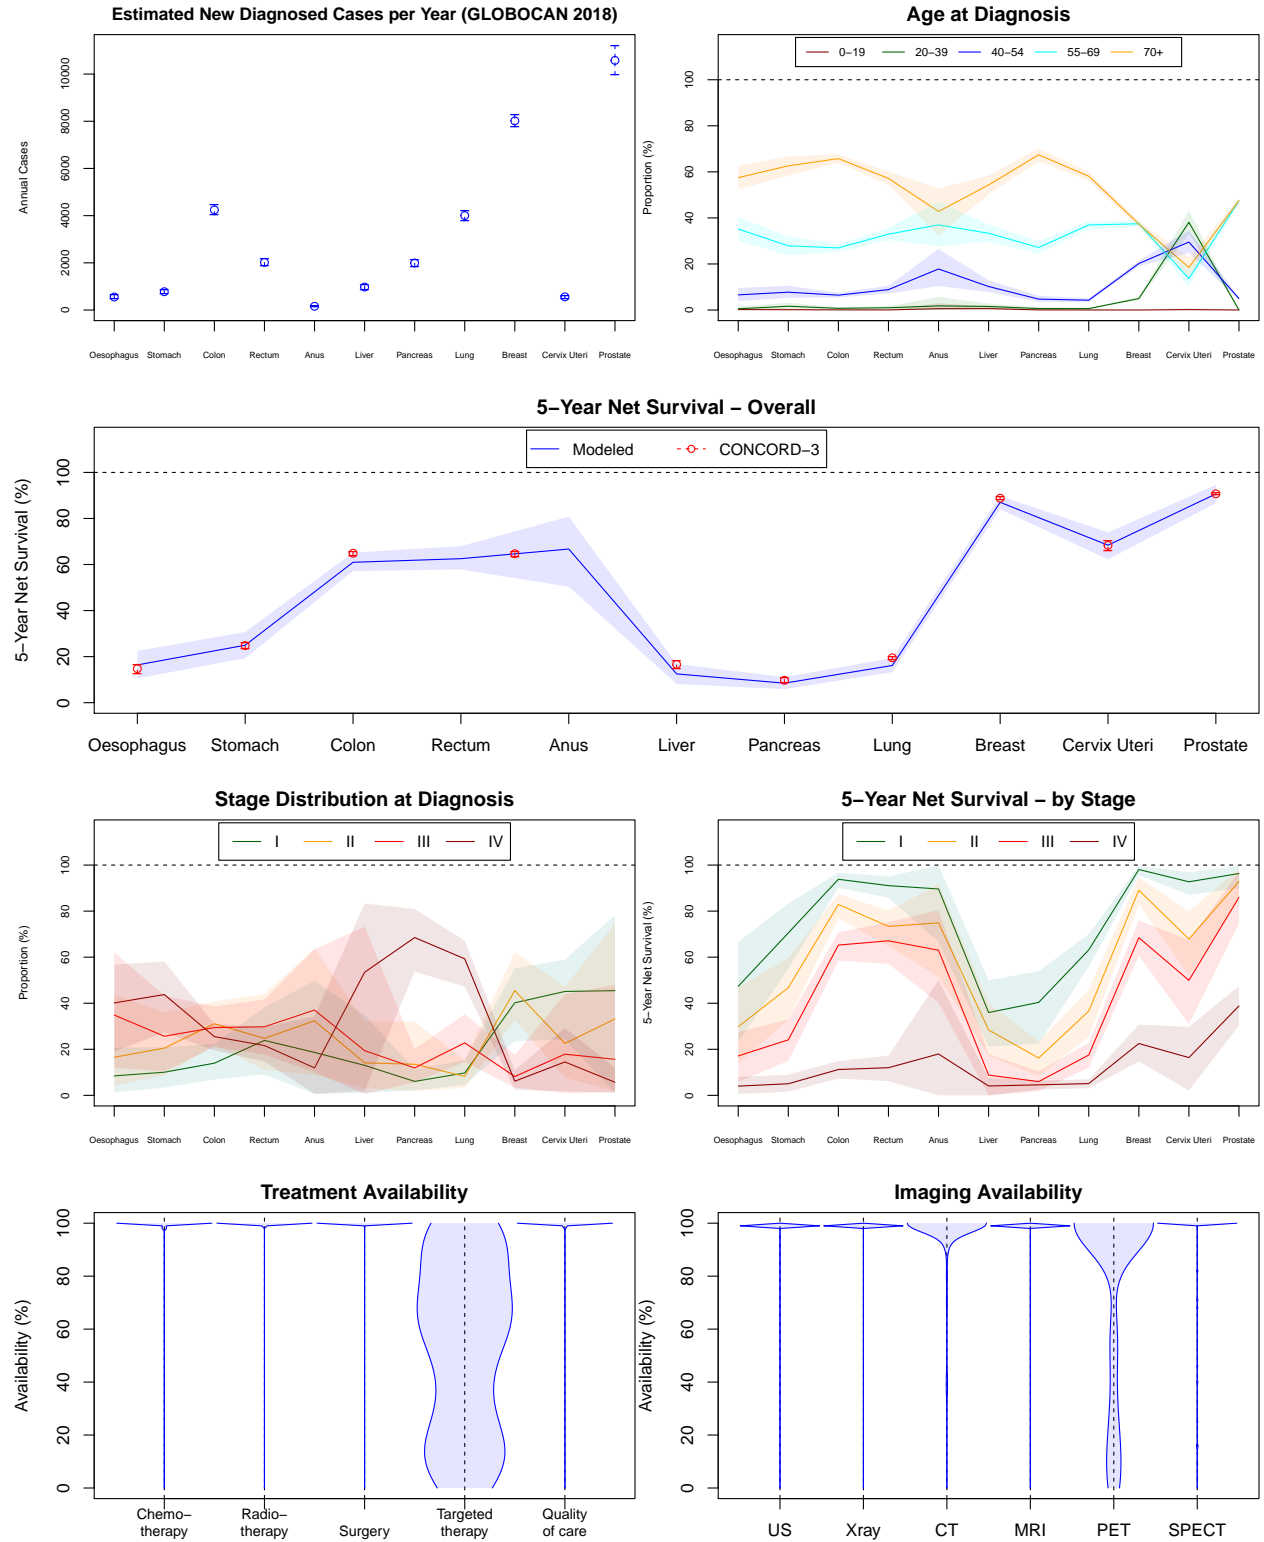

# Switzerland

| ISO Code | Region         | Area   | Income Group |
|----------|----------------|--------|--------------|
| CHE      | Western Europe | Europe | High income  |

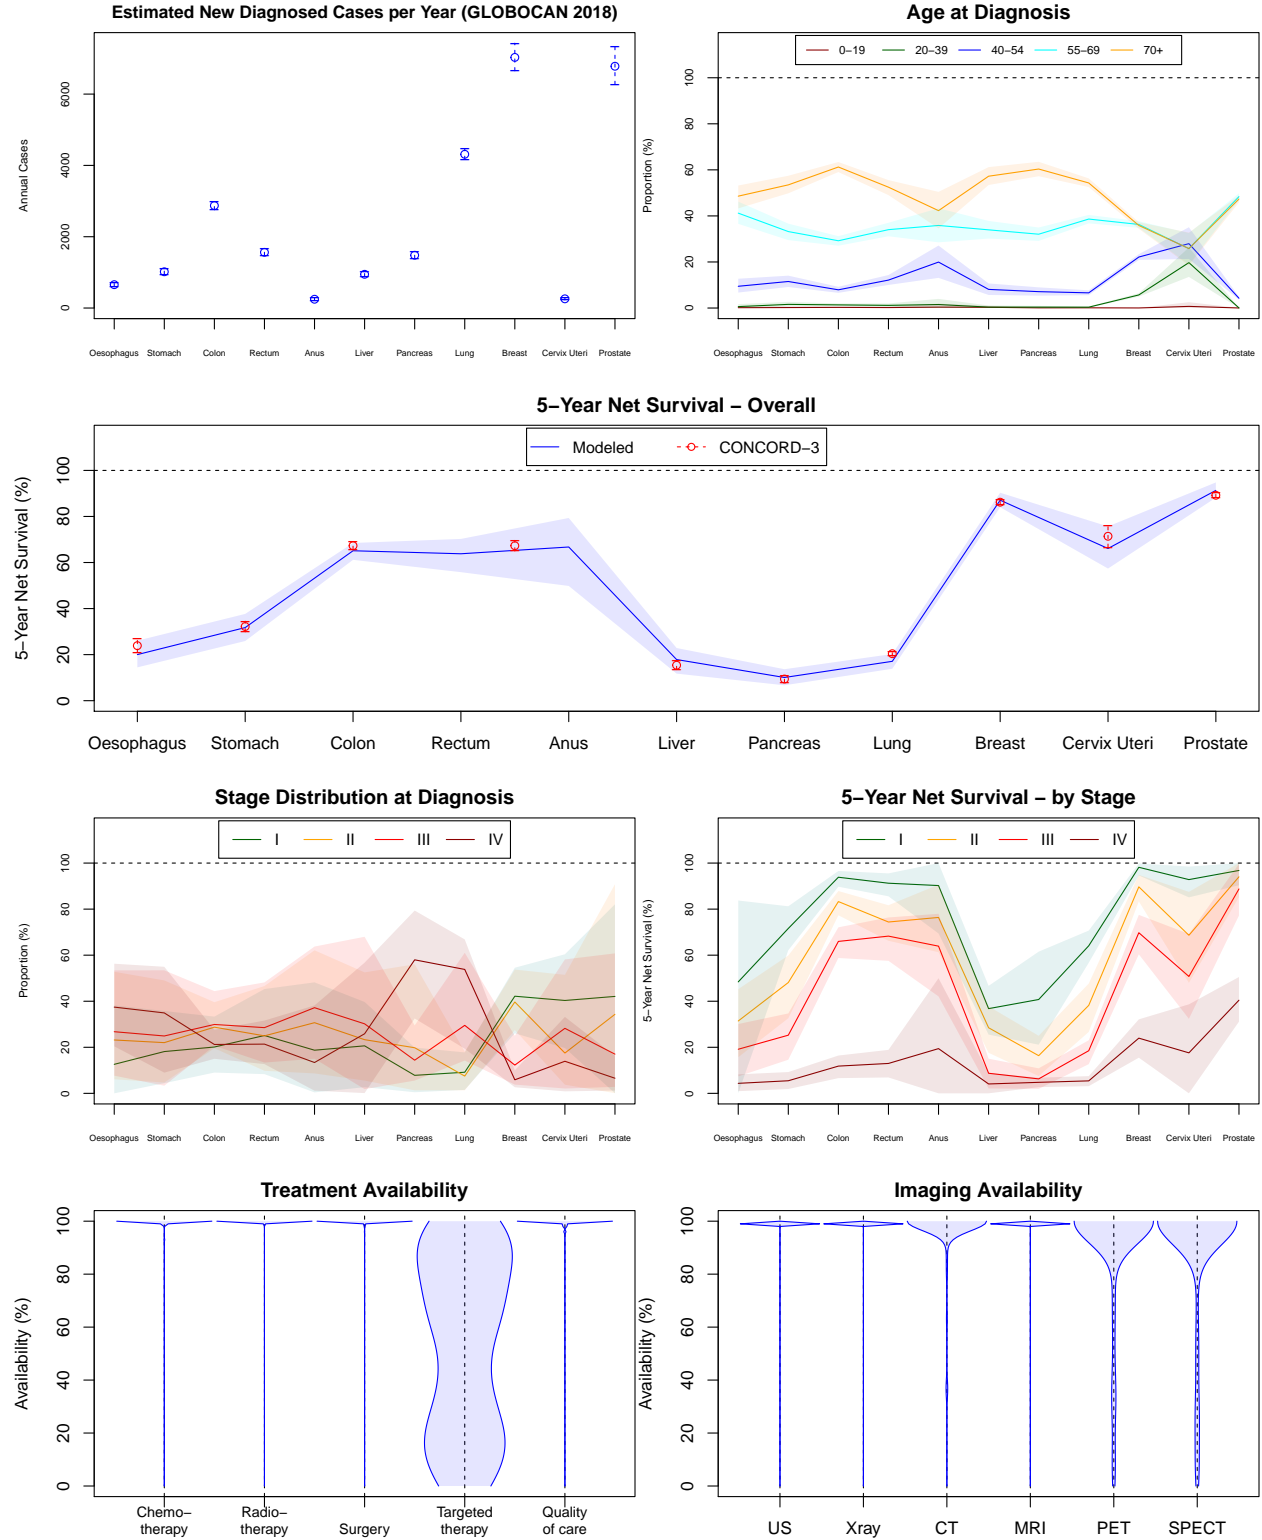

# Syrian Arab Republic

| ISO Code | Region       | Area | Income Group |
|----------|--------------|------|--------------|
| SYR      | Western Asia | Asia | Low income   |

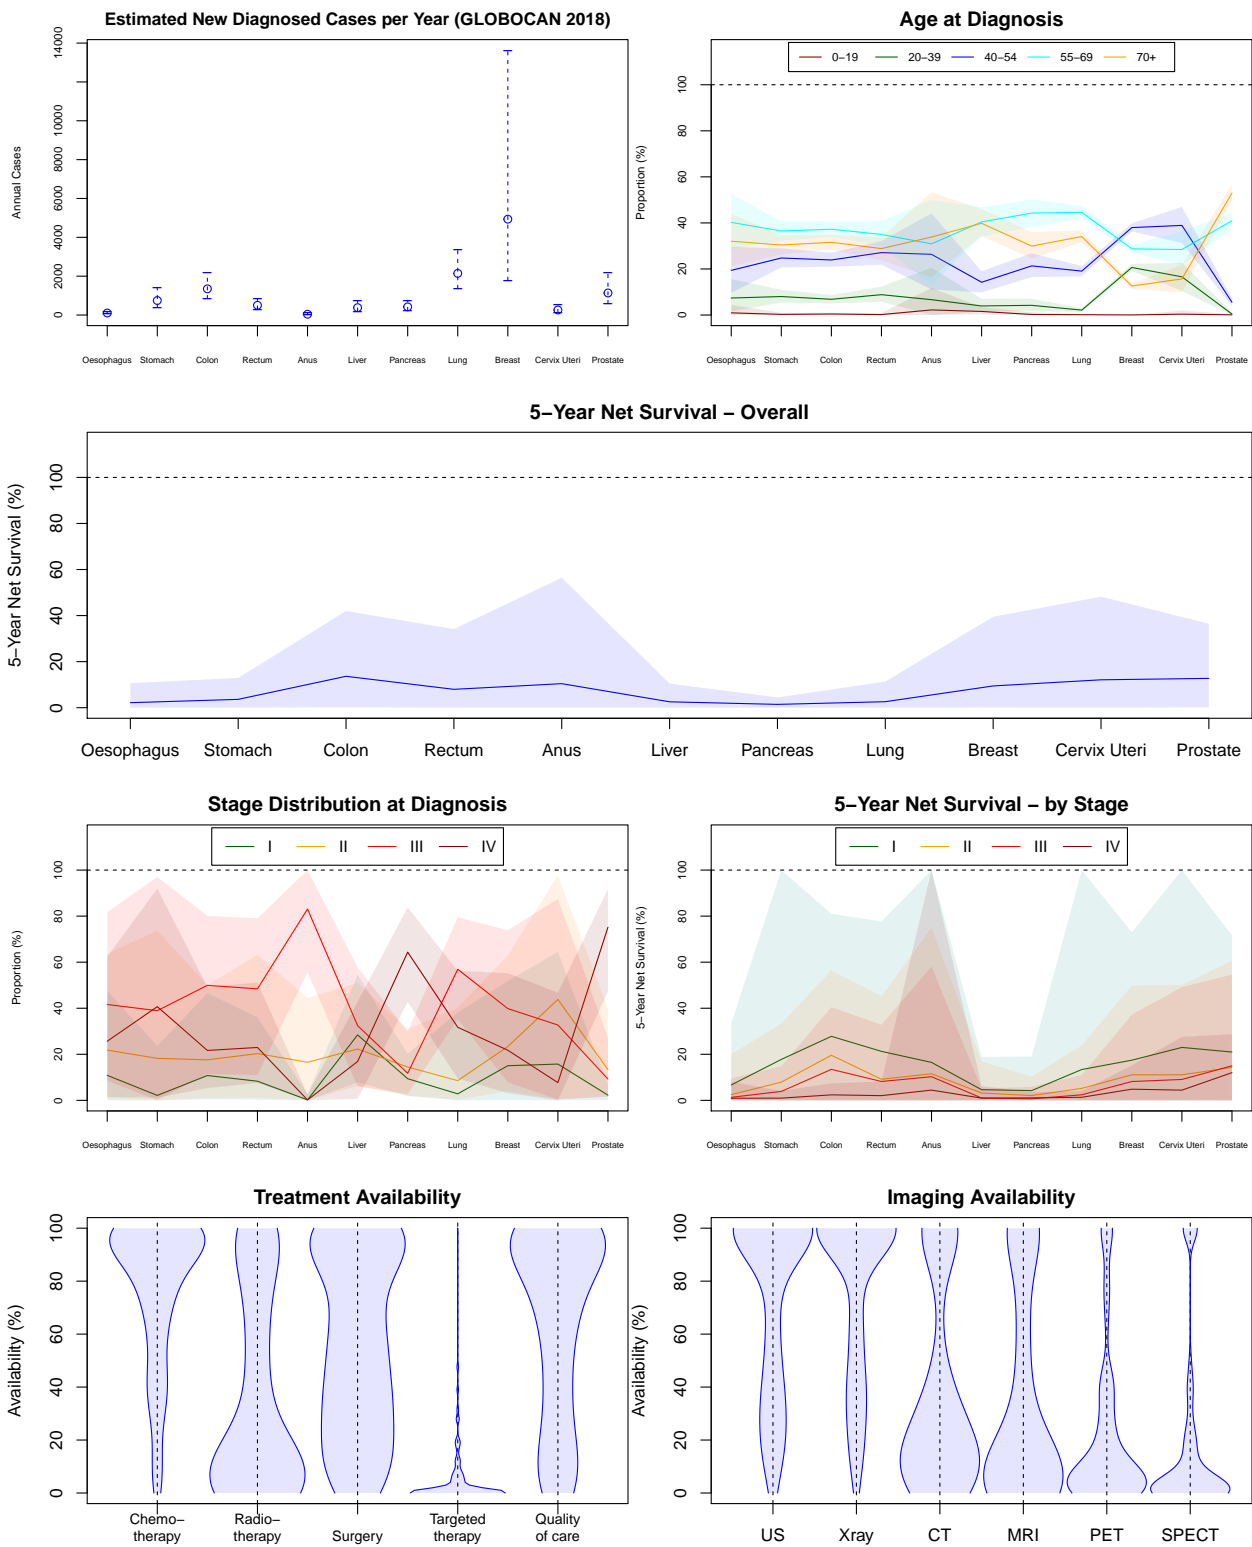

# Taiwan

| ISO Code | Region       | Area | Income Group |
|----------|--------------|------|--------------|
| TWN      | Eastern Asia | Asia | High income  |

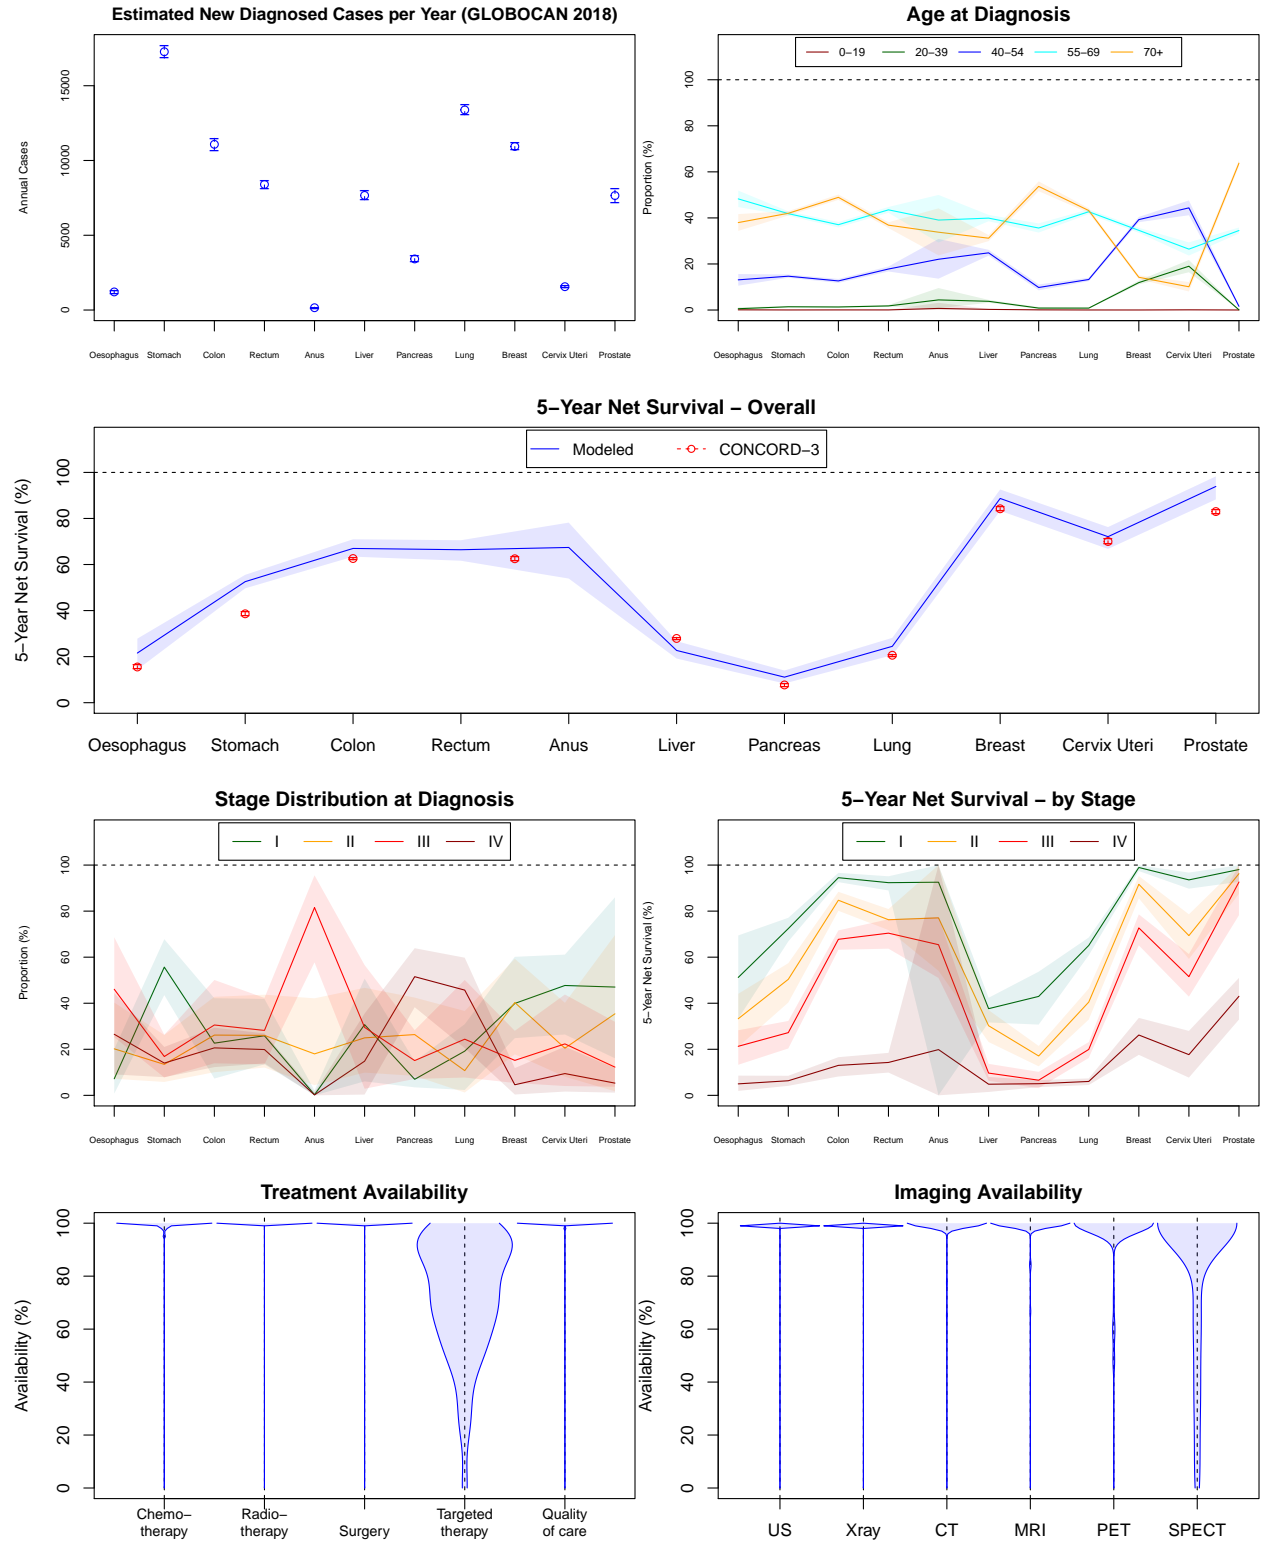

# Tajikistan

| ISO Code | Region       | Area | Income Group |
|----------|--------------|------|--------------|
| TJK      | Central Asia | Asia | Low income   |

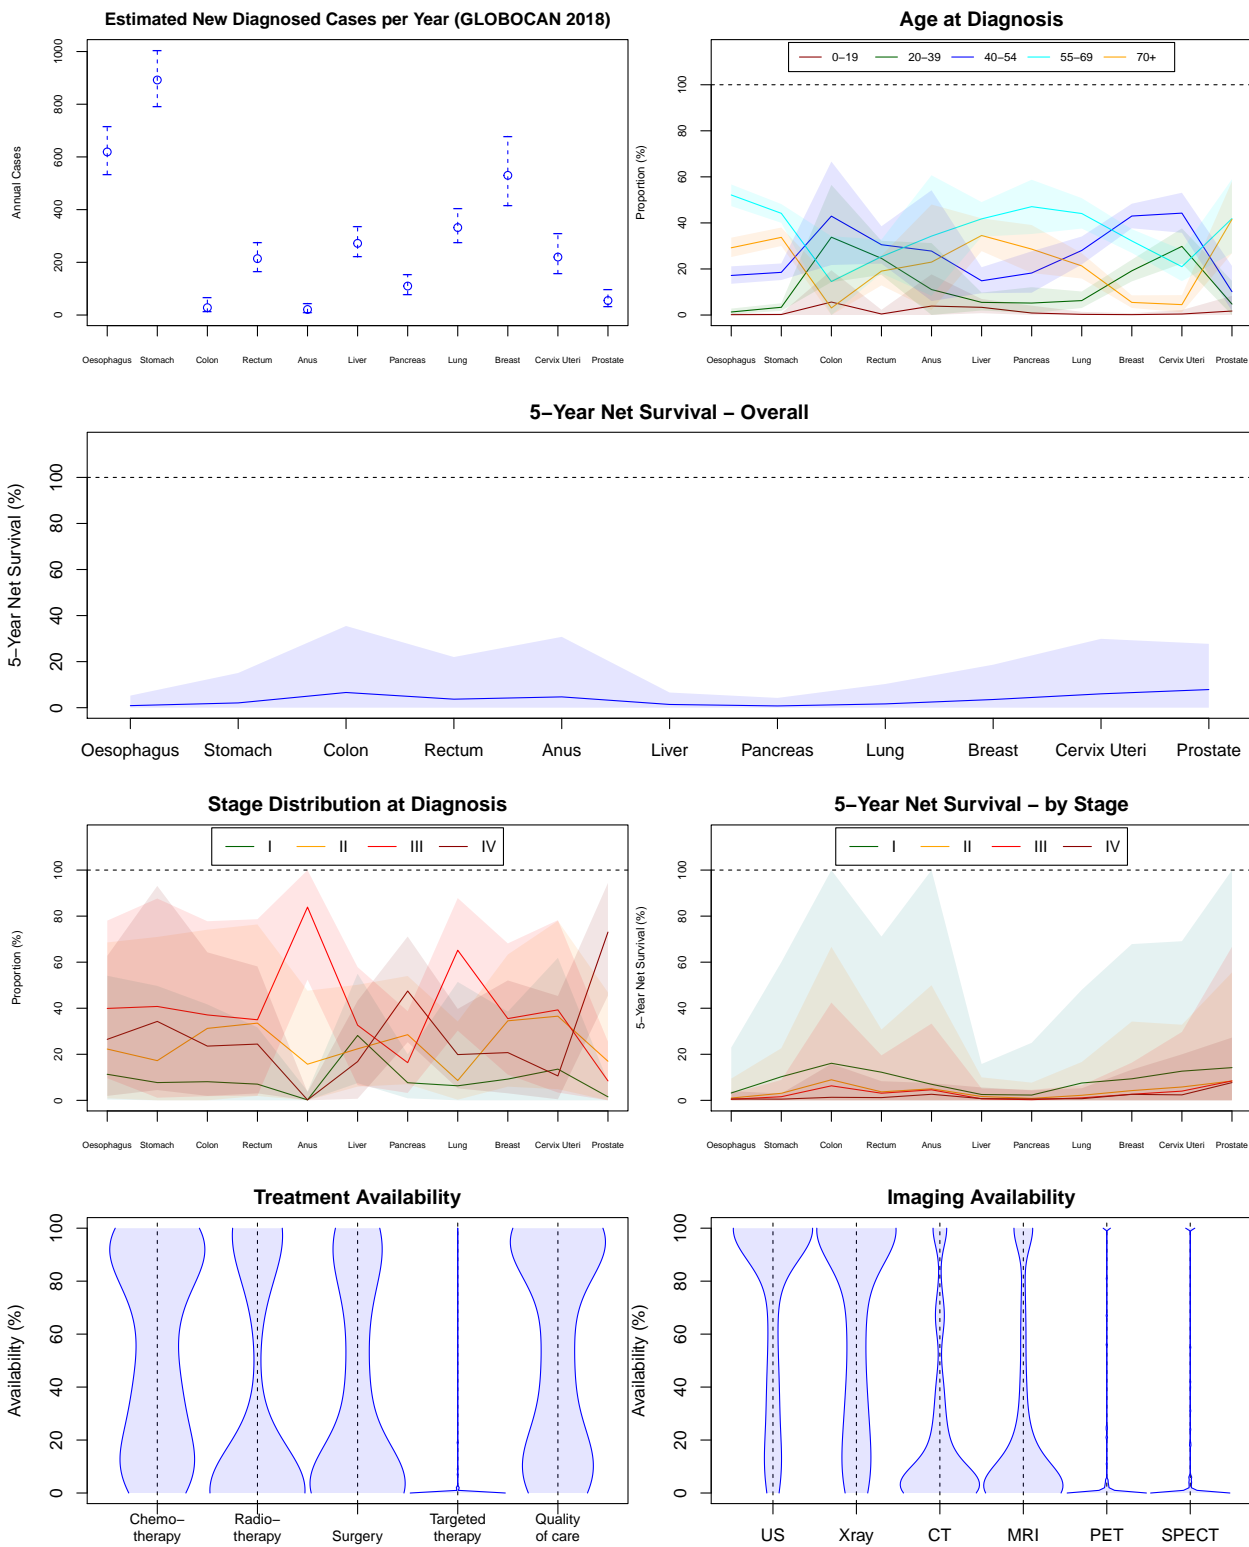

# Thailand

| ISO Code | Region             | Area | Income Group        |
|----------|--------------------|------|---------------------|
| THA      | South-Eastern Asia | Asia | Upper middle income |

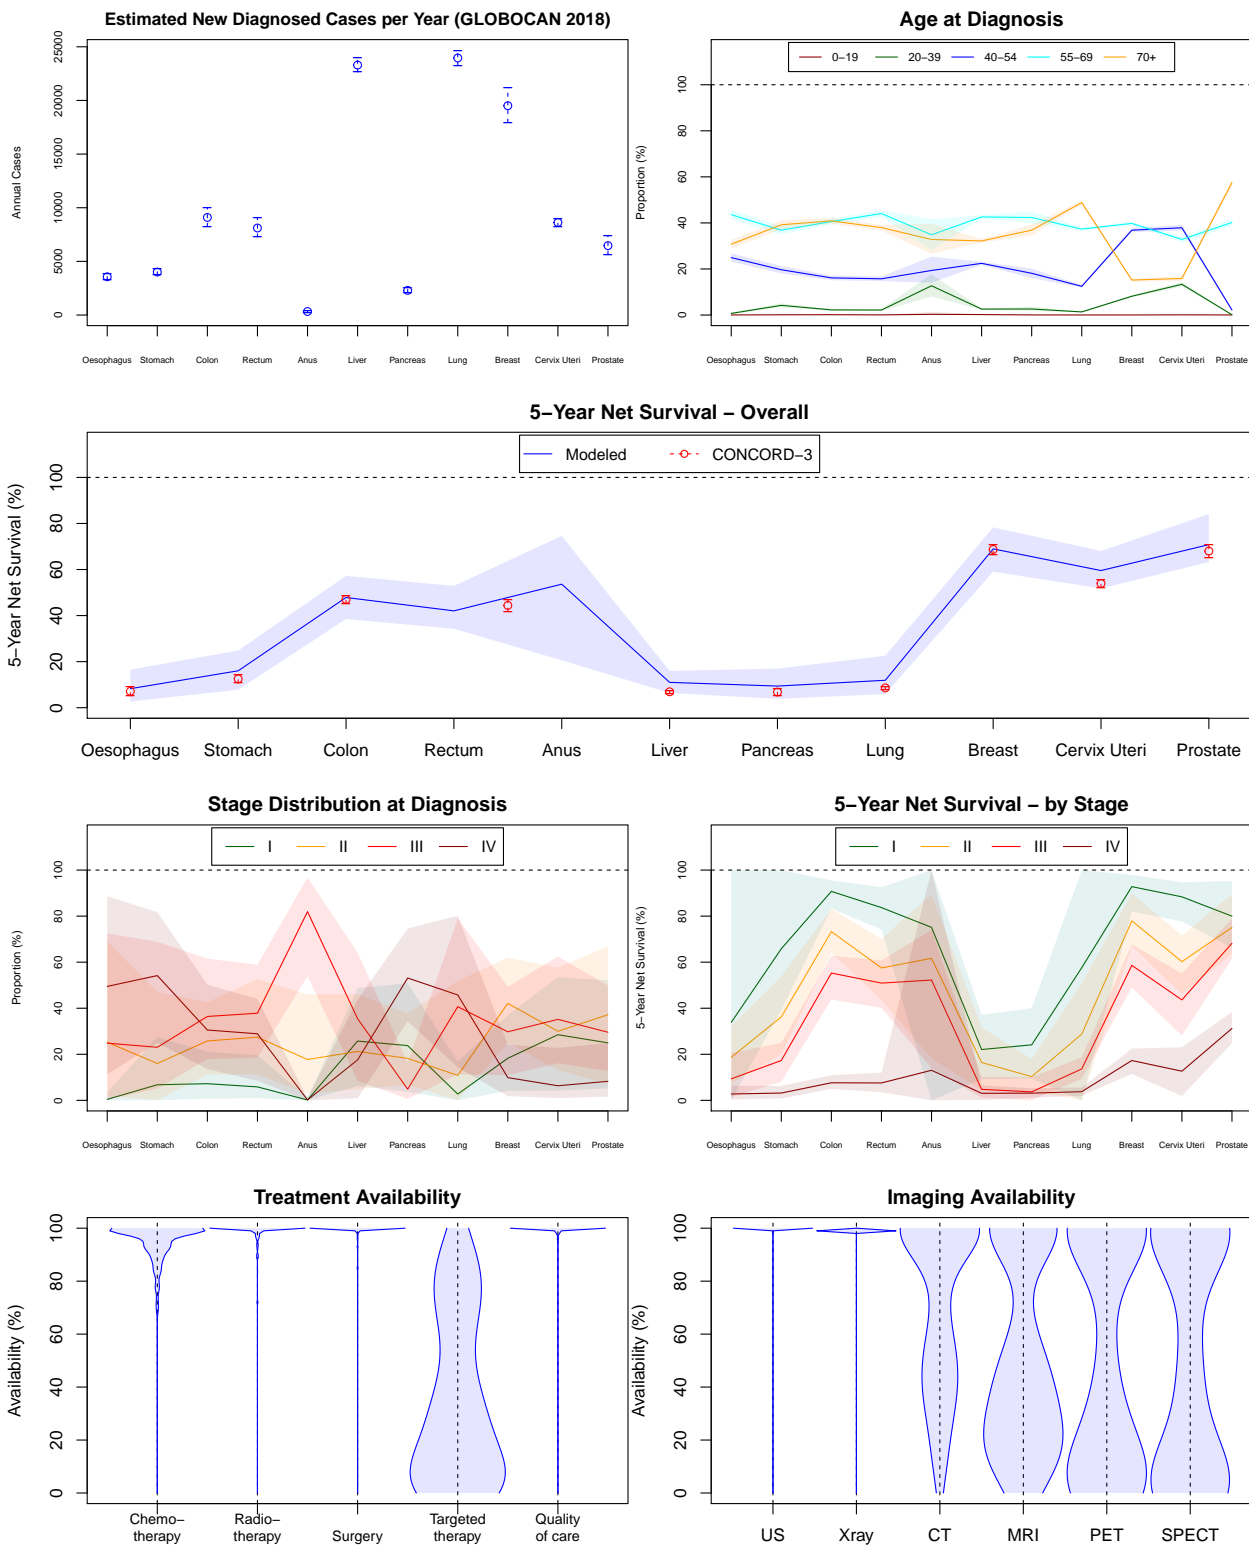



# Timor-Leste

| ISO Code | Region             | Area | Income Group        |
|----------|--------------------|------|---------------------|
| TLS      | South-Eastern Asia | Asia | Lower middle income |

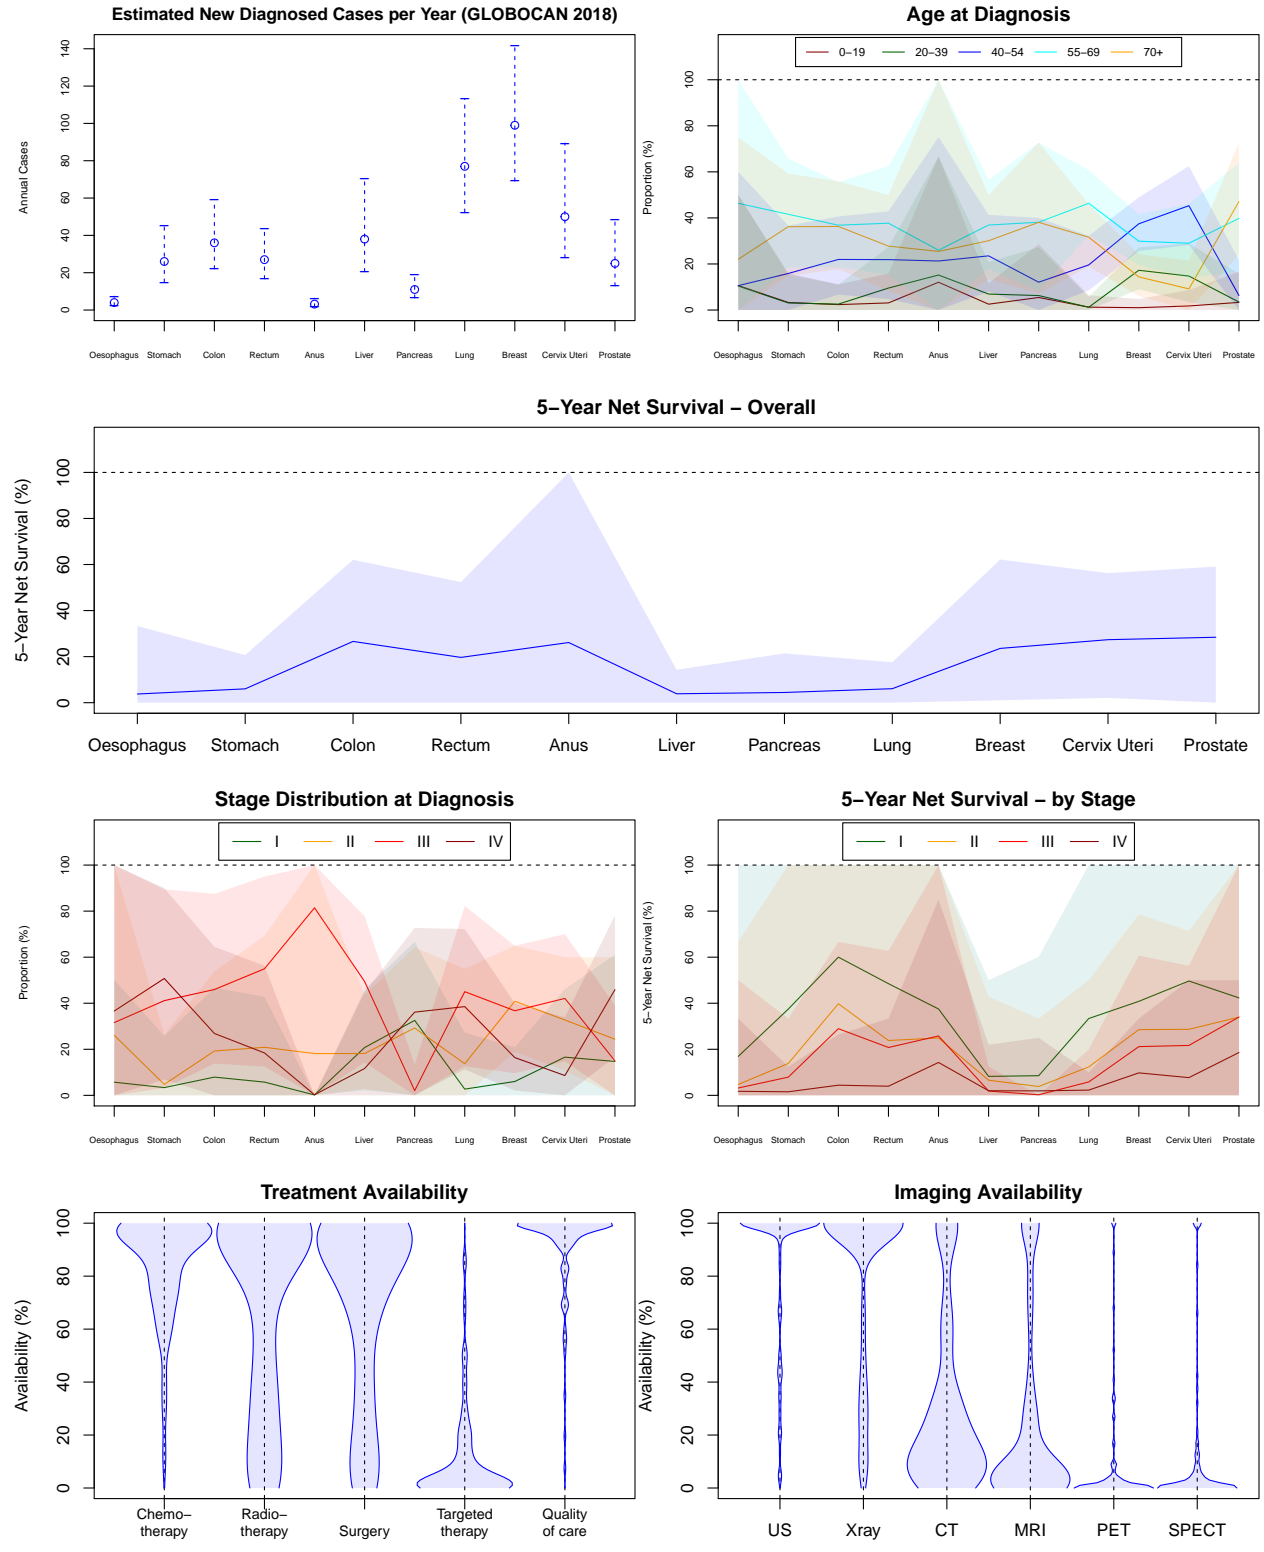

# Togo

| ISO Code | Region         | Area   | Income Group |
|----------|----------------|--------|--------------|
| TGO      | Western Africa | Africa | Low income   |

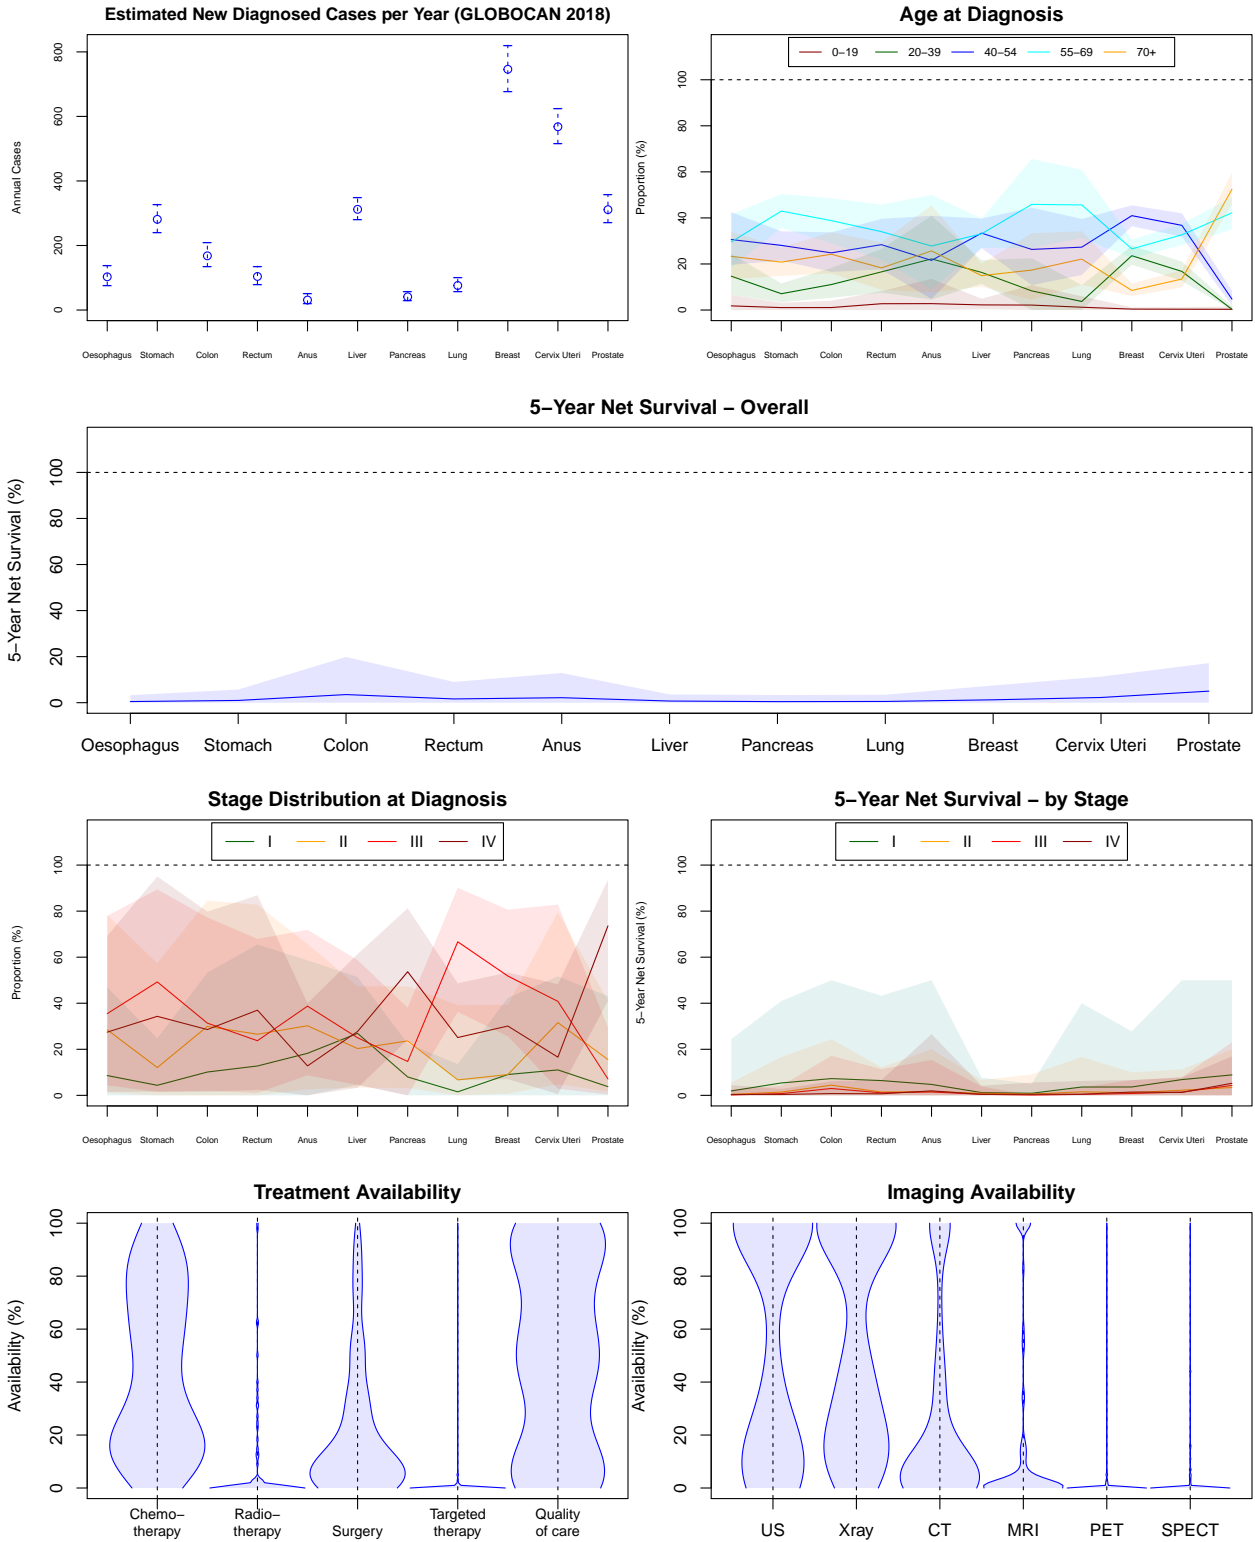

# Tonga

| ISO Code | Region    | Area    | Income Group        |
|----------|-----------|---------|---------------------|
| TON      | Polynesia | Oceania | Upper middle income |

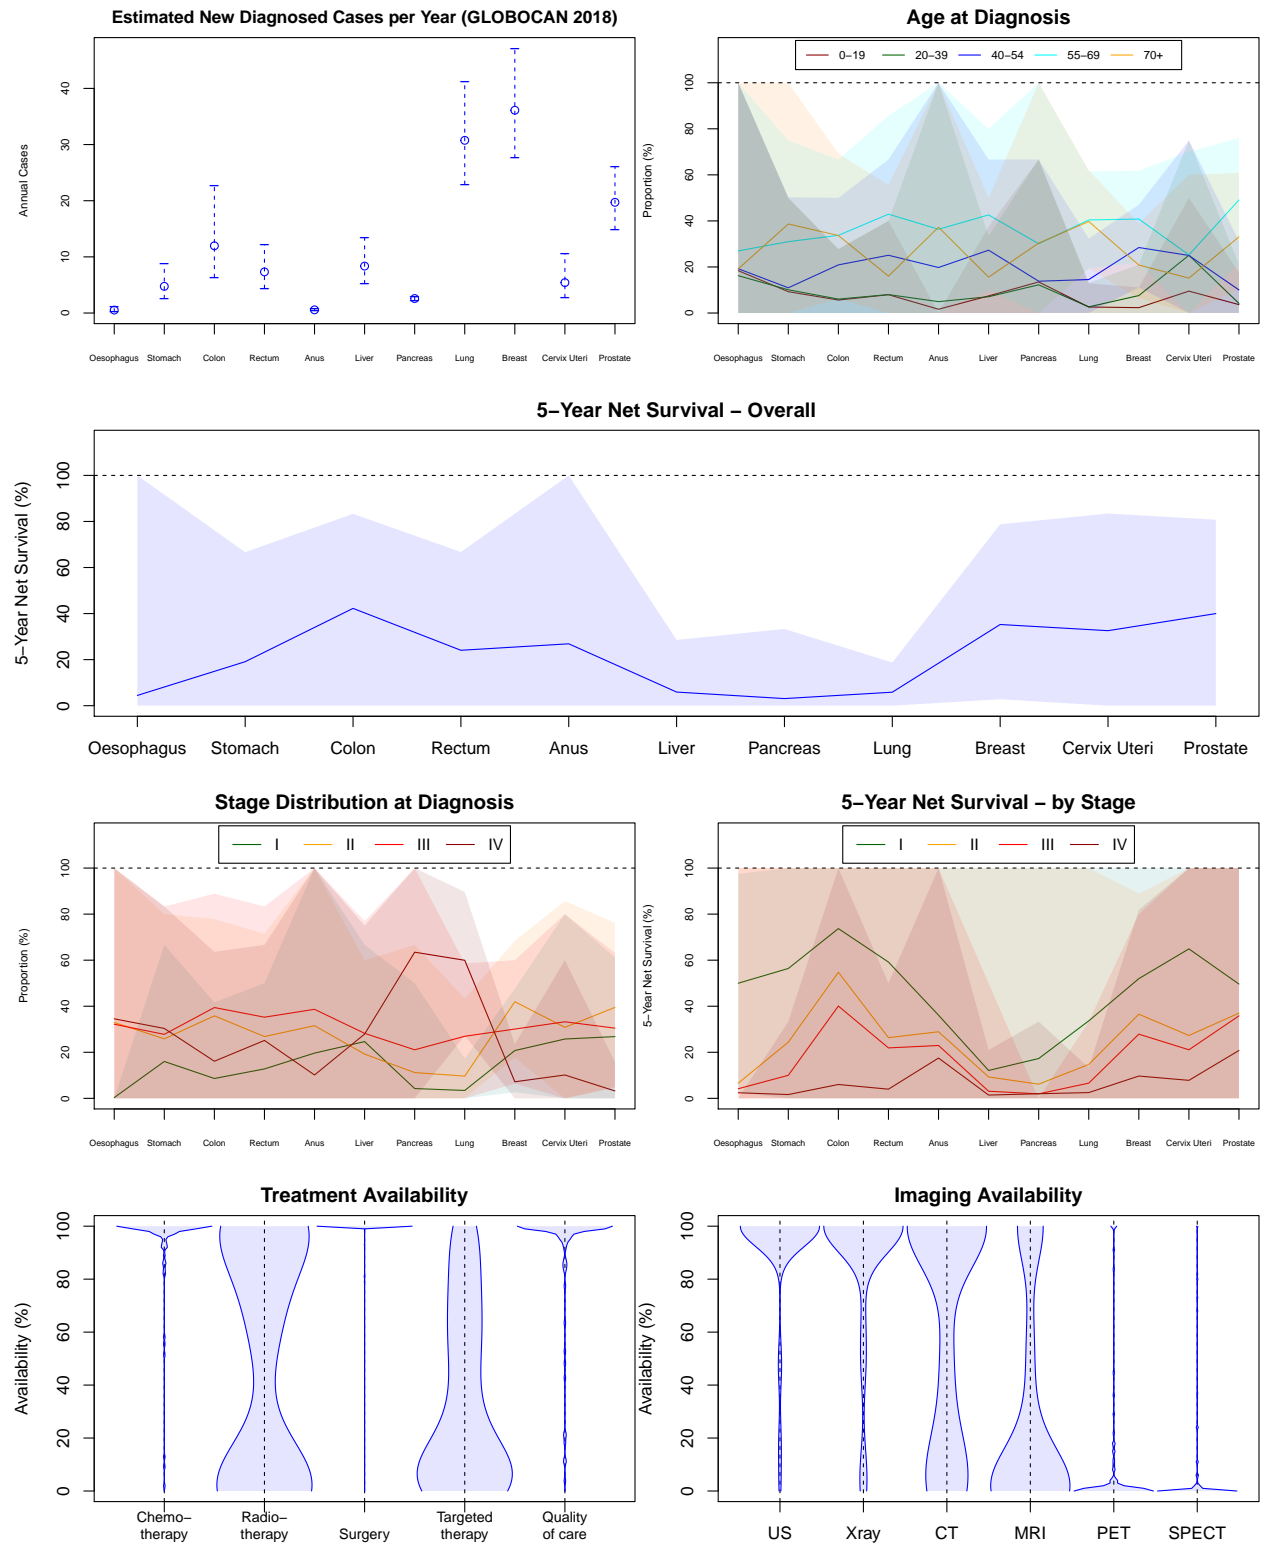

# Trinidad and Tobago

| ISO Code | Region    | Area                            | Income Group |
|----------|-----------|---------------------------------|--------------|
| TTO      | Caribbean | Latin America and the Caribbean | High income  |

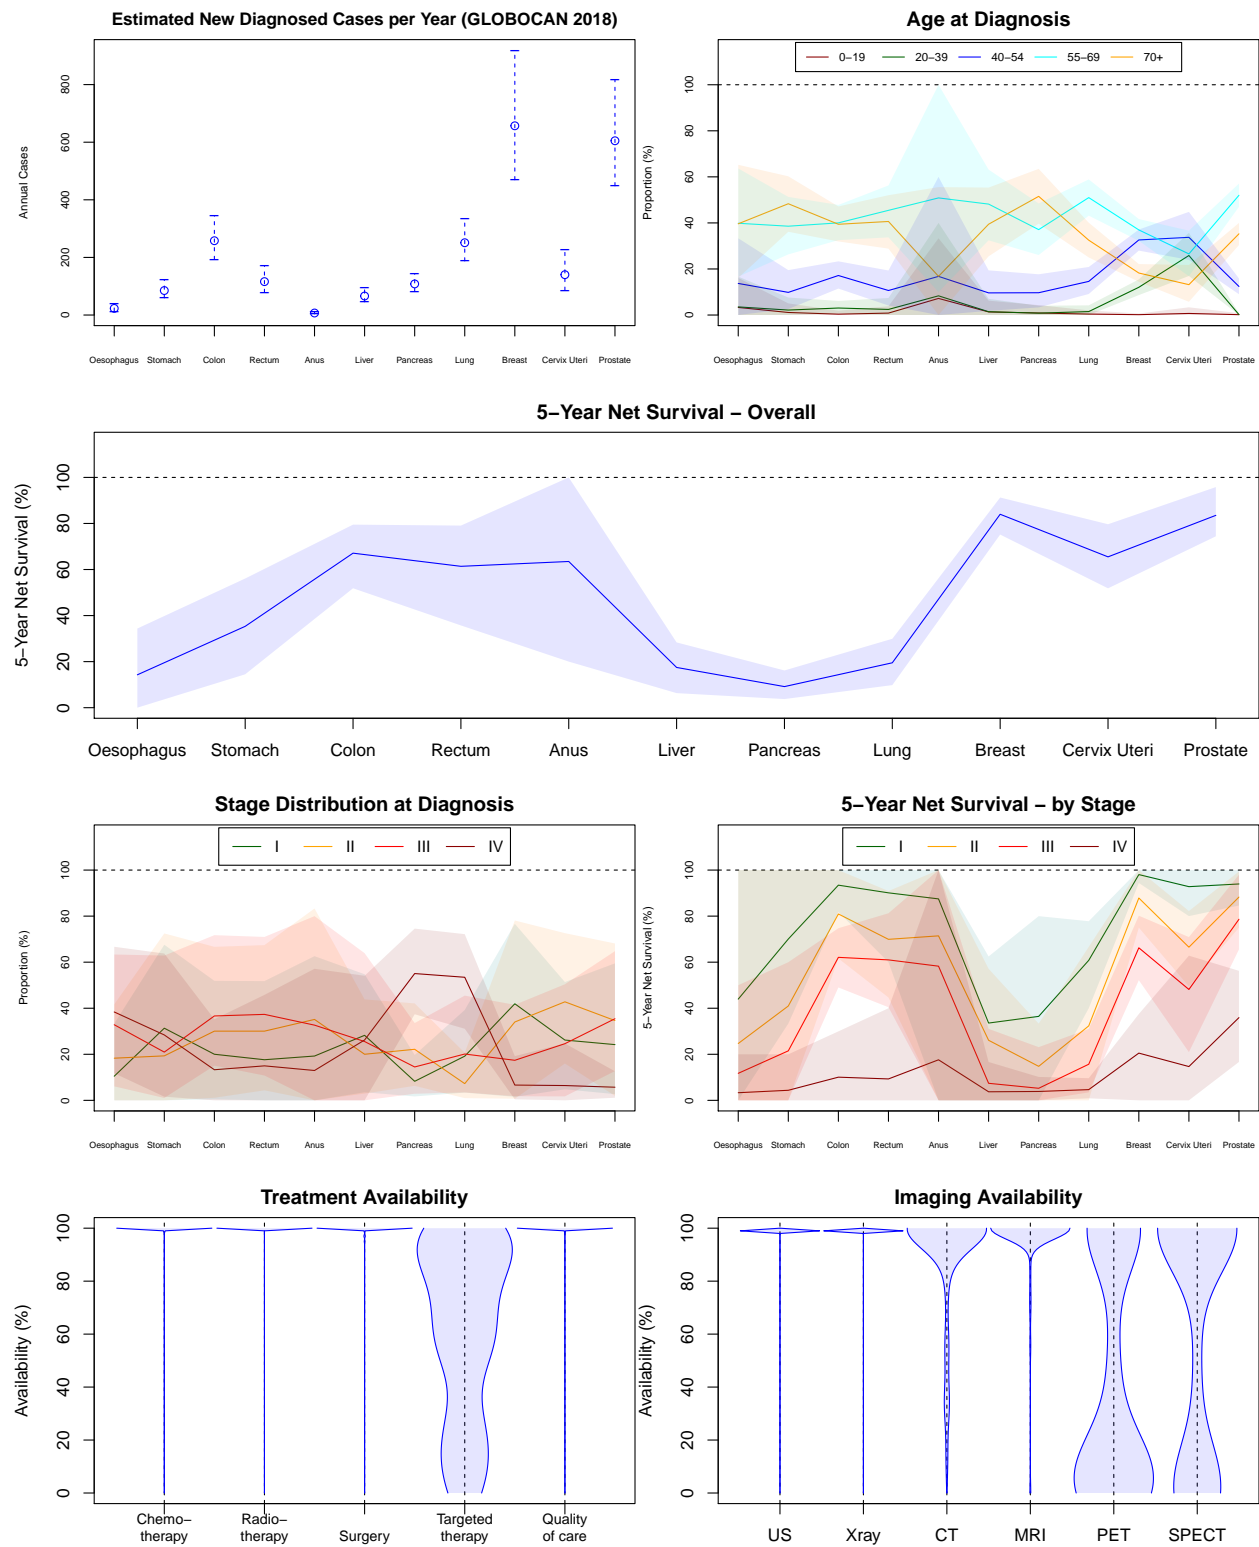

# Tunisia

| ISO Code | Region          | Area   | Income Group        |
|----------|-----------------|--------|---------------------|
| TUN      | Northern Africa | Africa | Lower middle income |

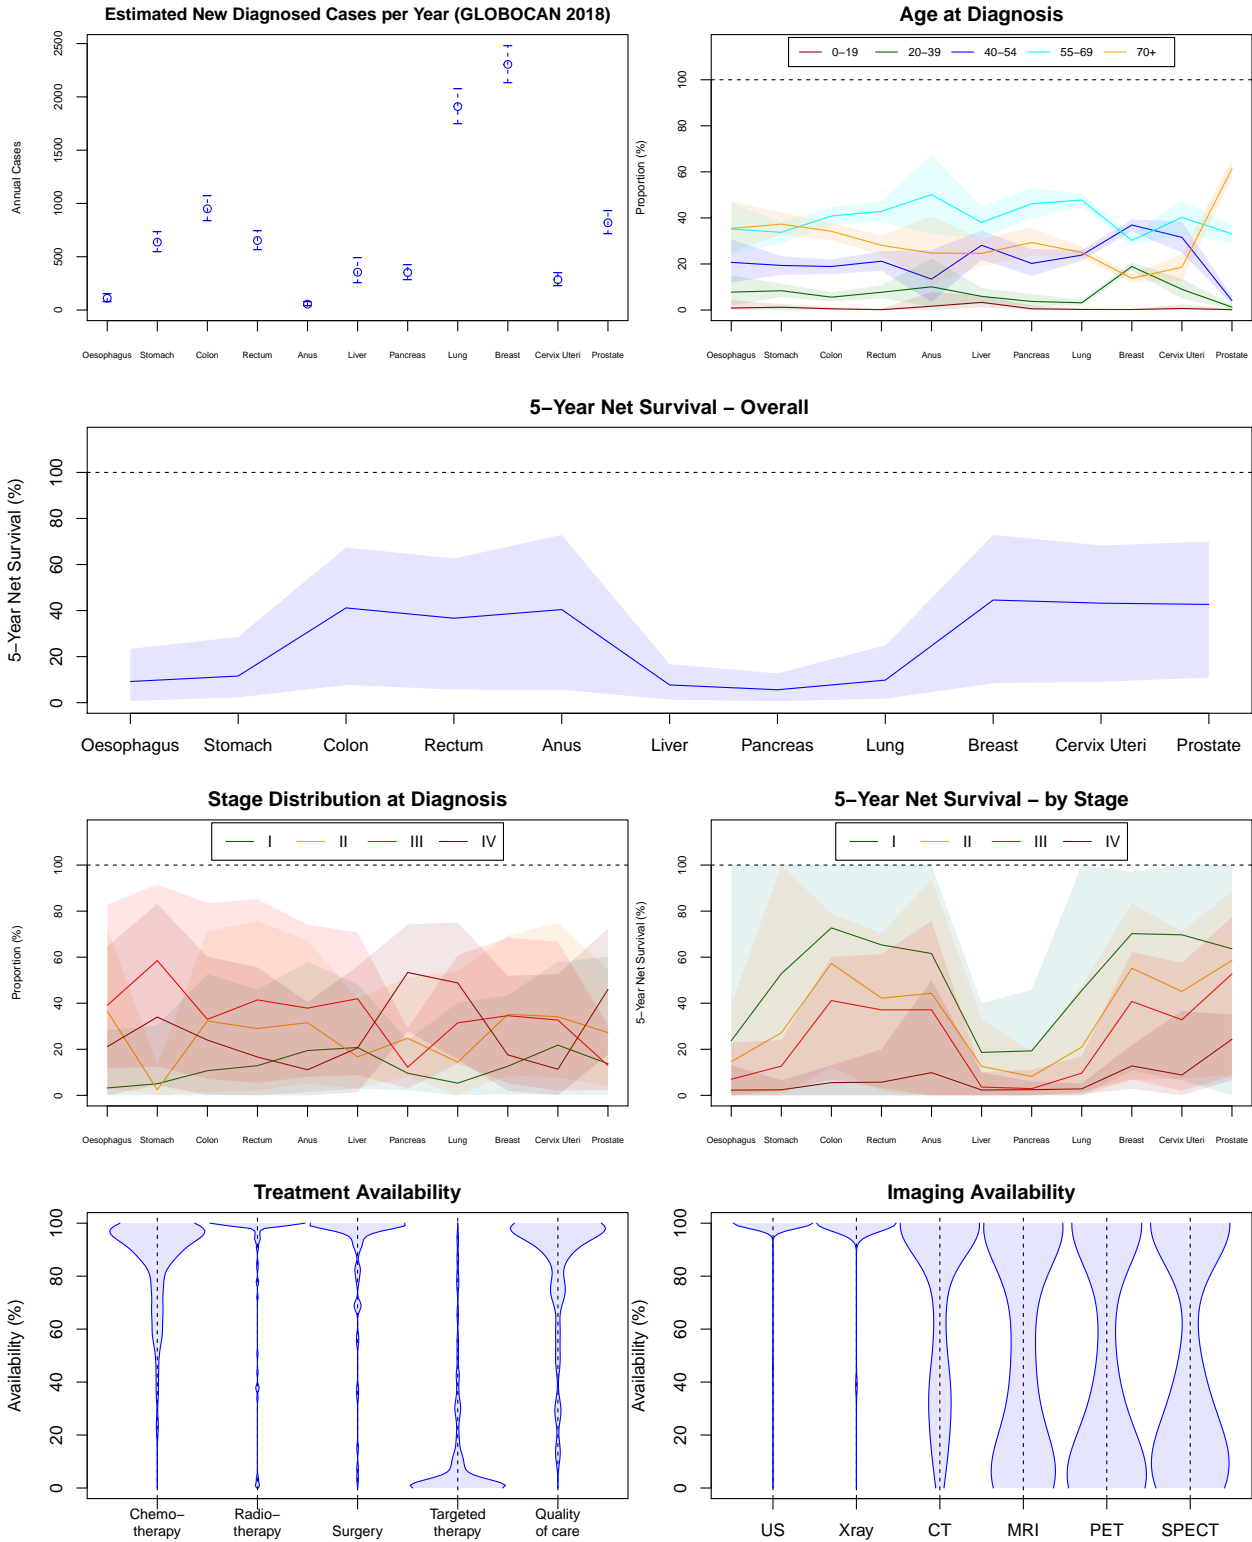

# Turkey

| ISO Code | Region       | Area | Income Group        |
|----------|--------------|------|---------------------|
| TUR      | Western Asia | Asia | Upper middle income |

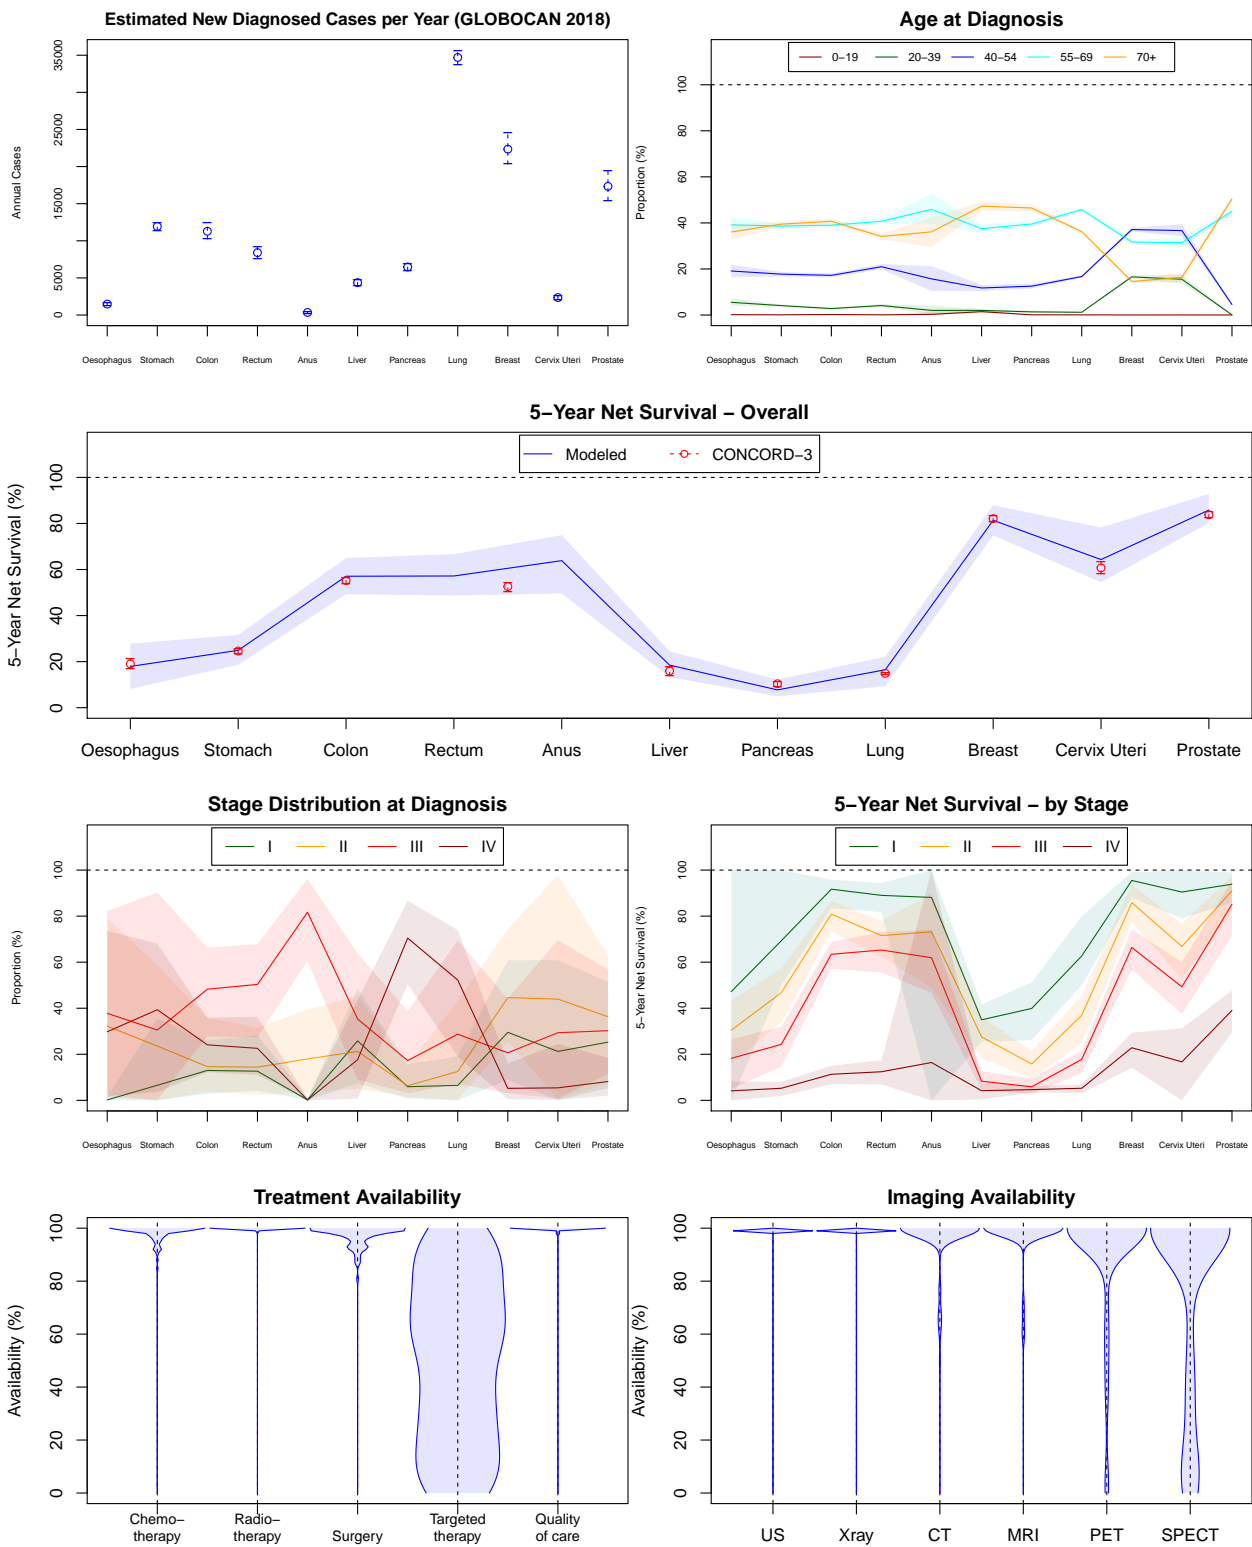

# Turkmenistan

| ISO Code | Region       | Area | Income Group        |
|----------|--------------|------|---------------------|
| TKM      | Central Asia | Asia | Upper middle income |

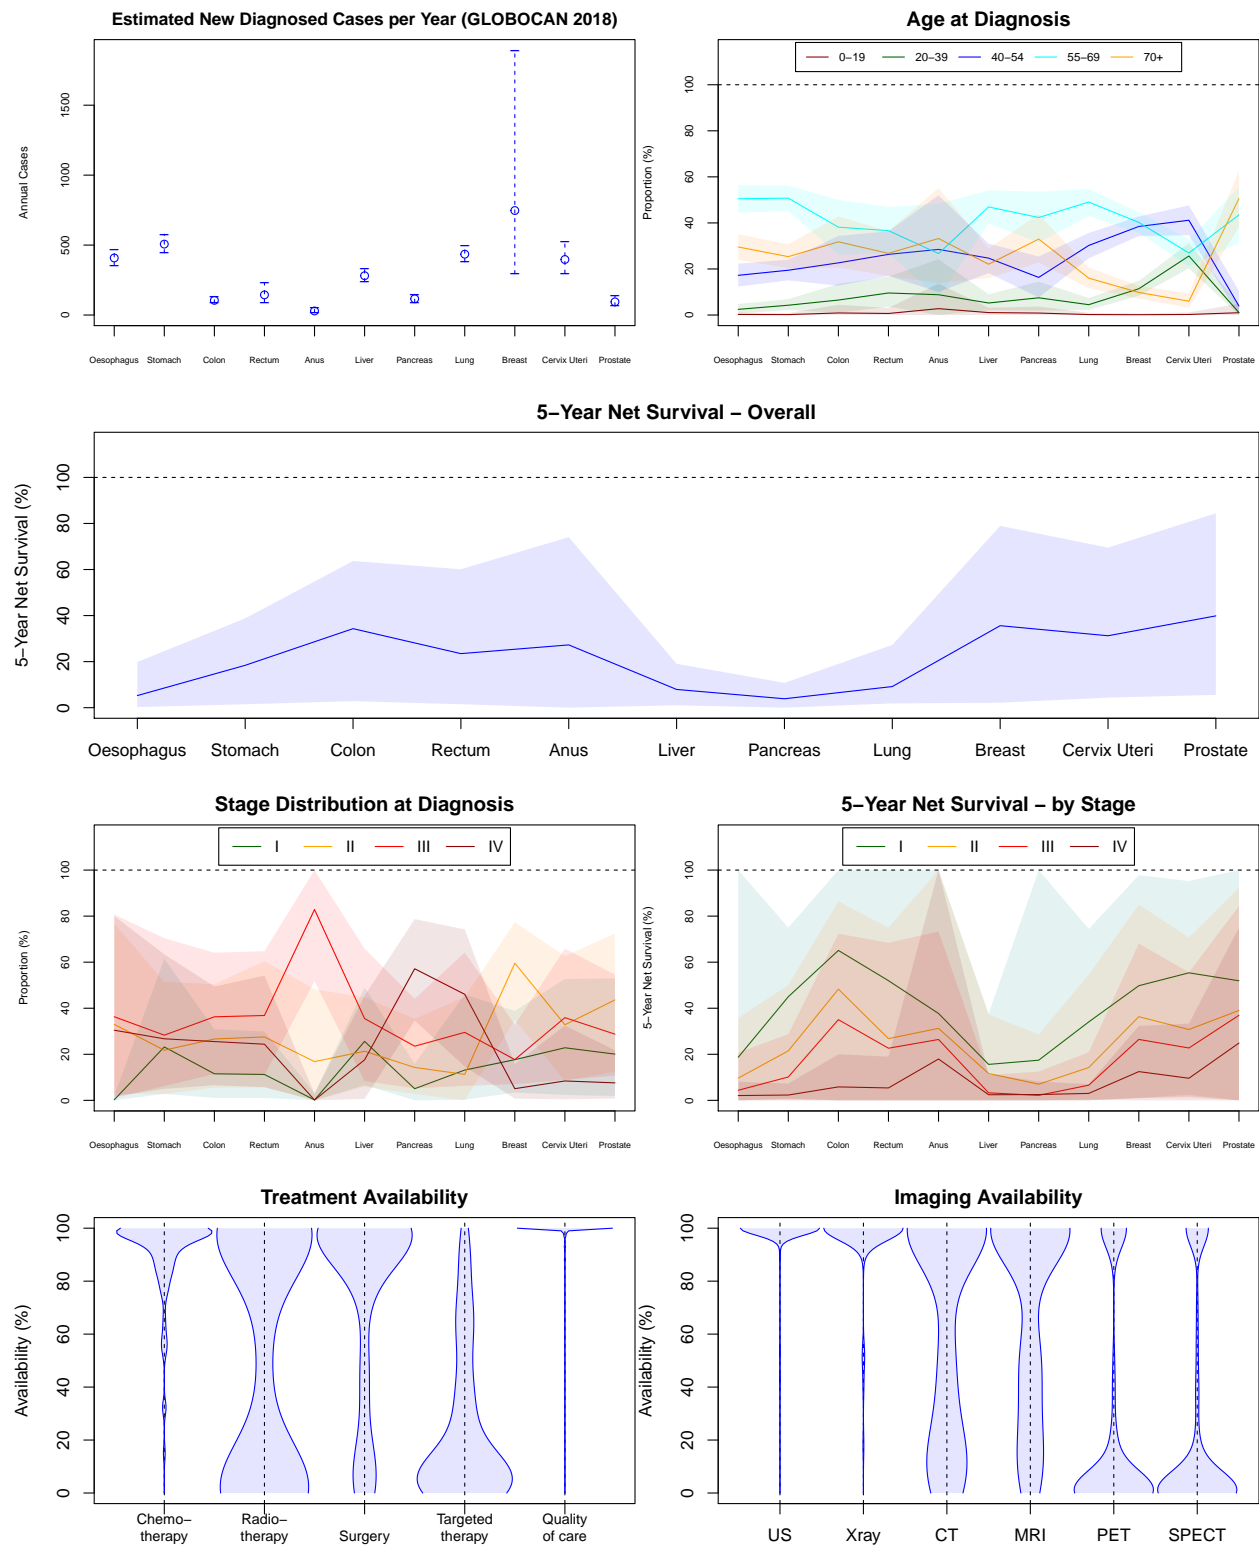

# Tuvalu

| ISO Code | Region    | Area    | Income Group        |
|----------|-----------|---------|---------------------|
| TUV      | Polynesia | Oceania | Upper middle income |

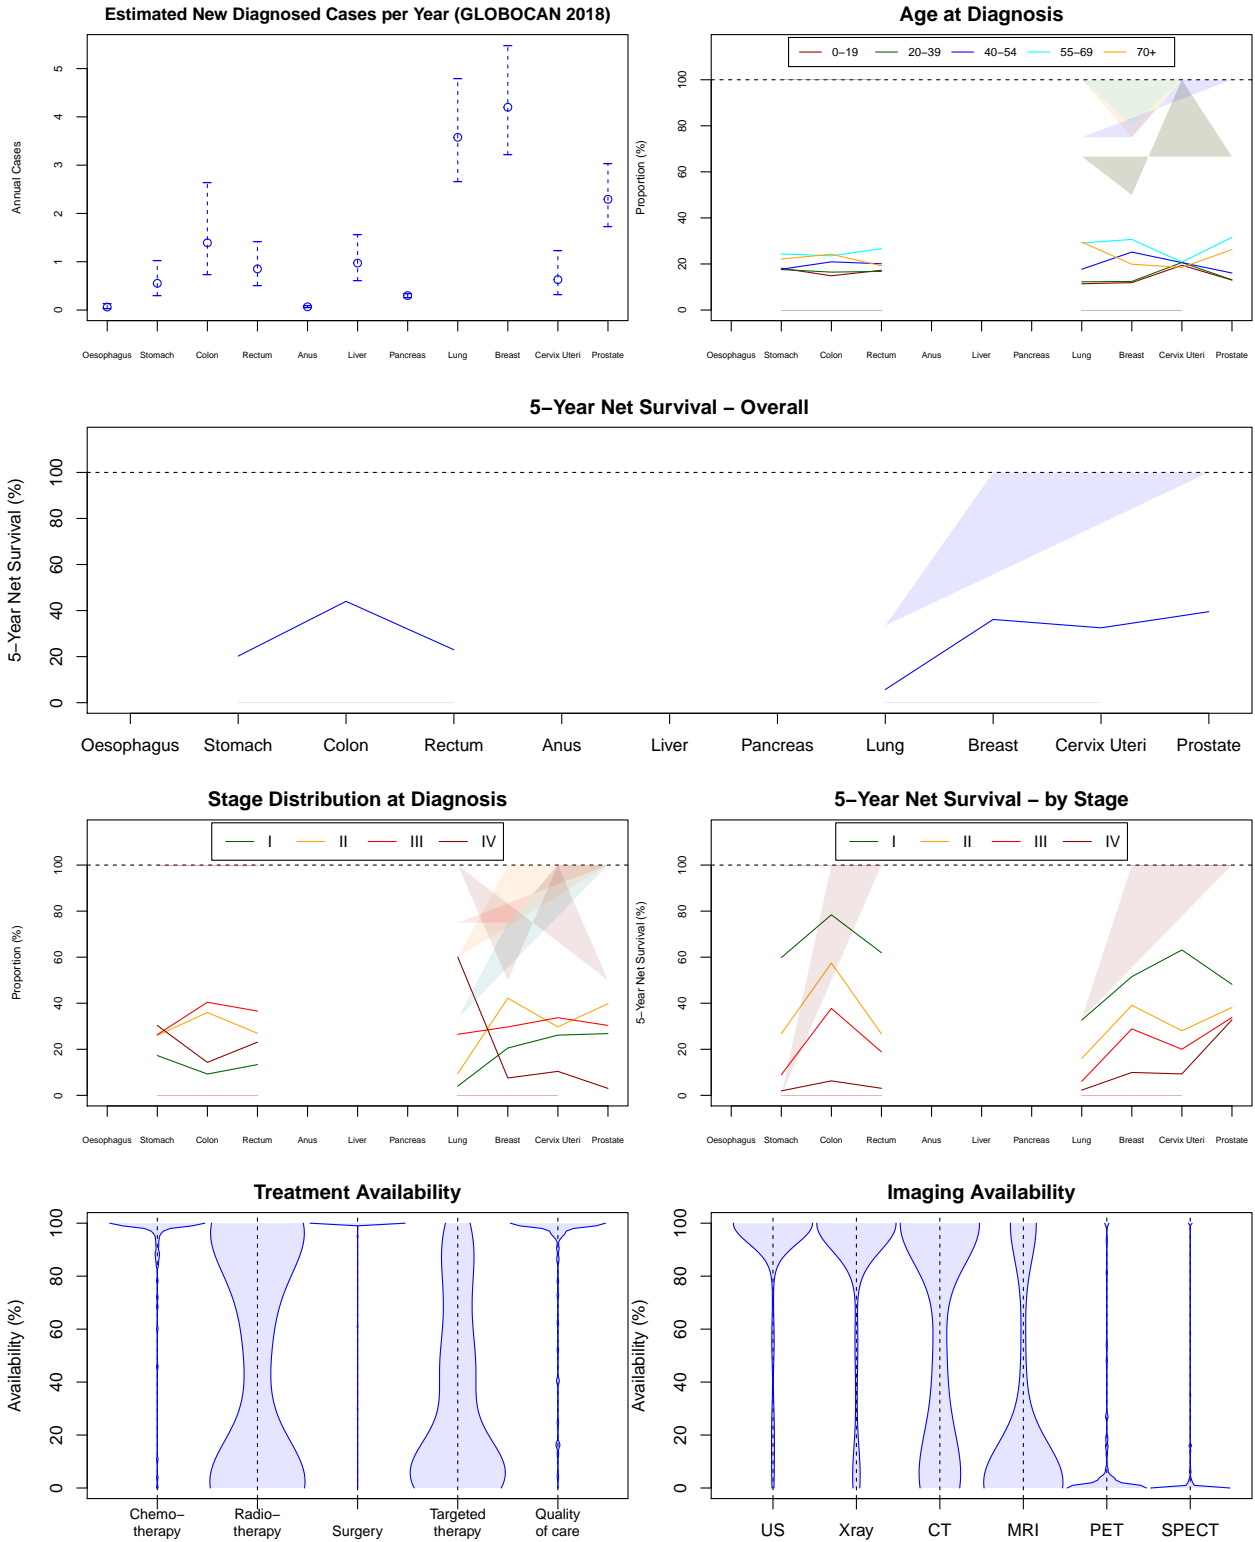



# Uganda

| ISO Code | Region         | Area   | Income Group |
|----------|----------------|--------|--------------|
| UGA      | Eastern Africa | Africa | Low income   |

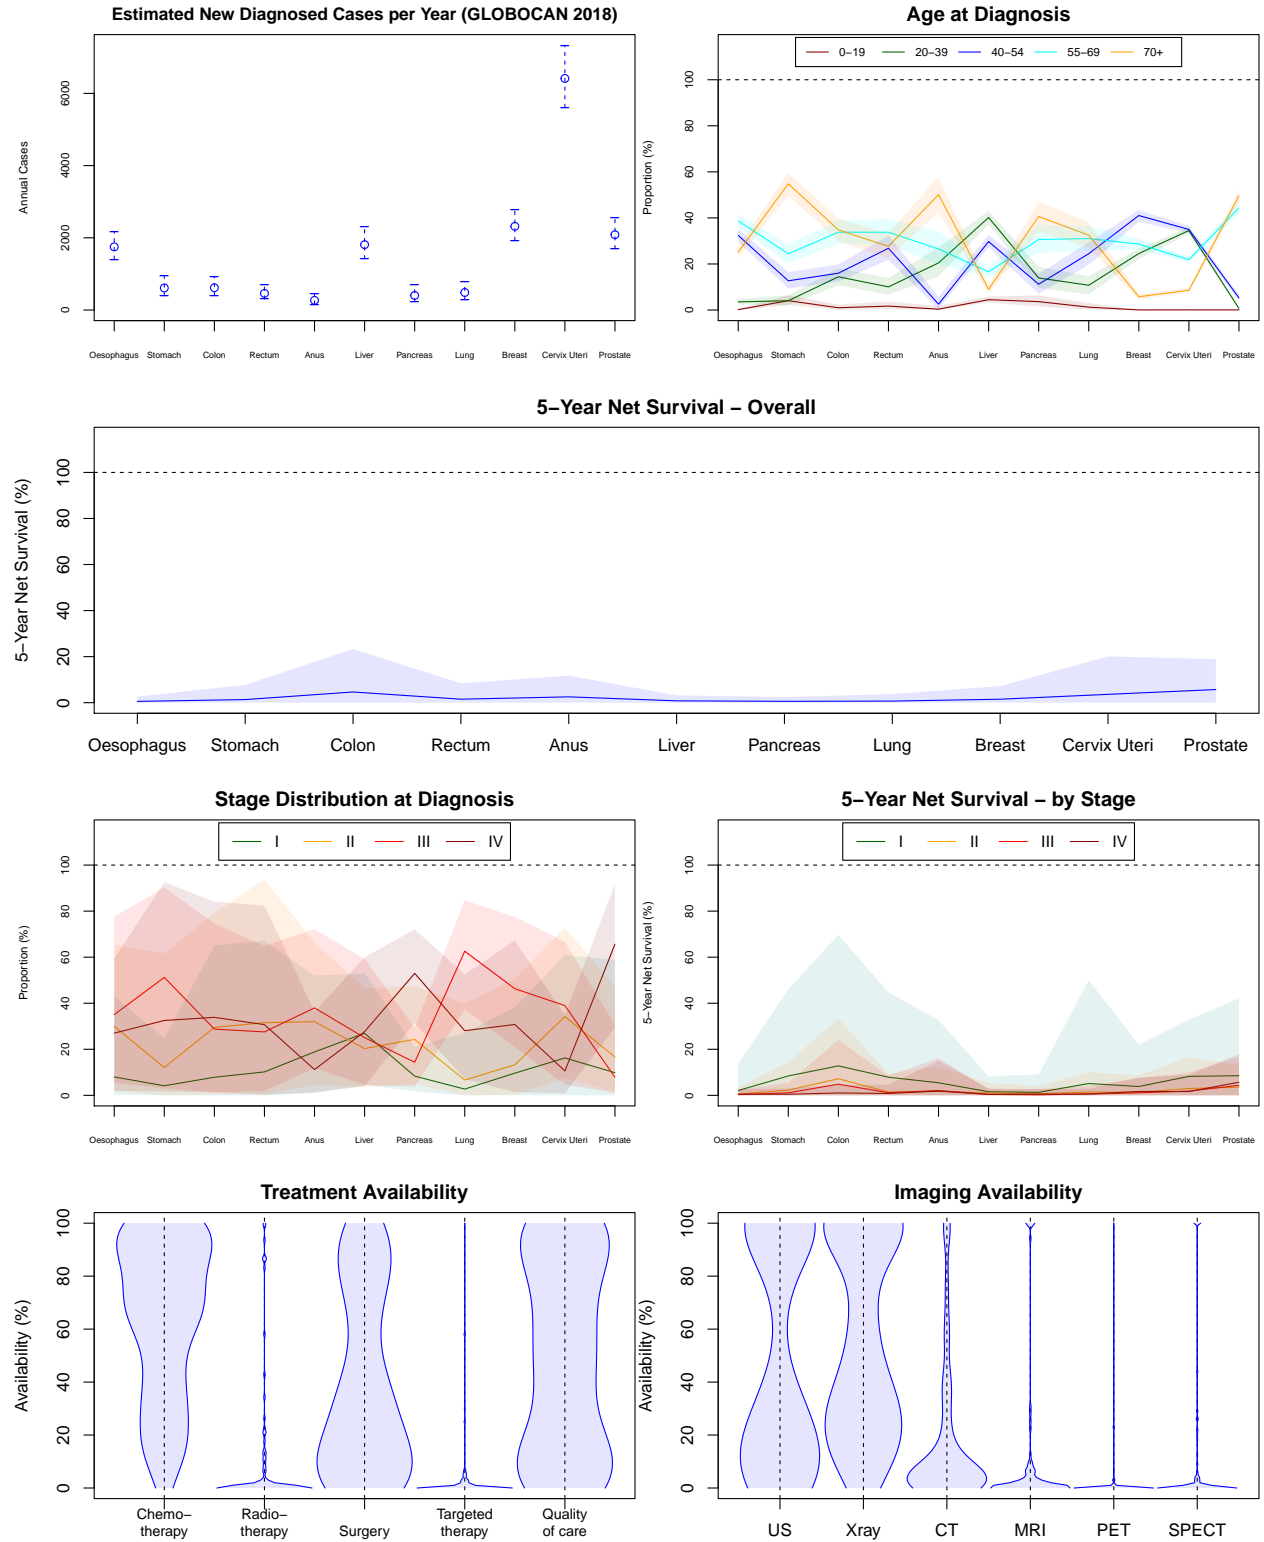

# Ukraine

| ISO Code | Region         | Area   | Income Group        |
|----------|----------------|--------|---------------------|
| UKR      | Eastern Europe | Europe | Lower middle income |

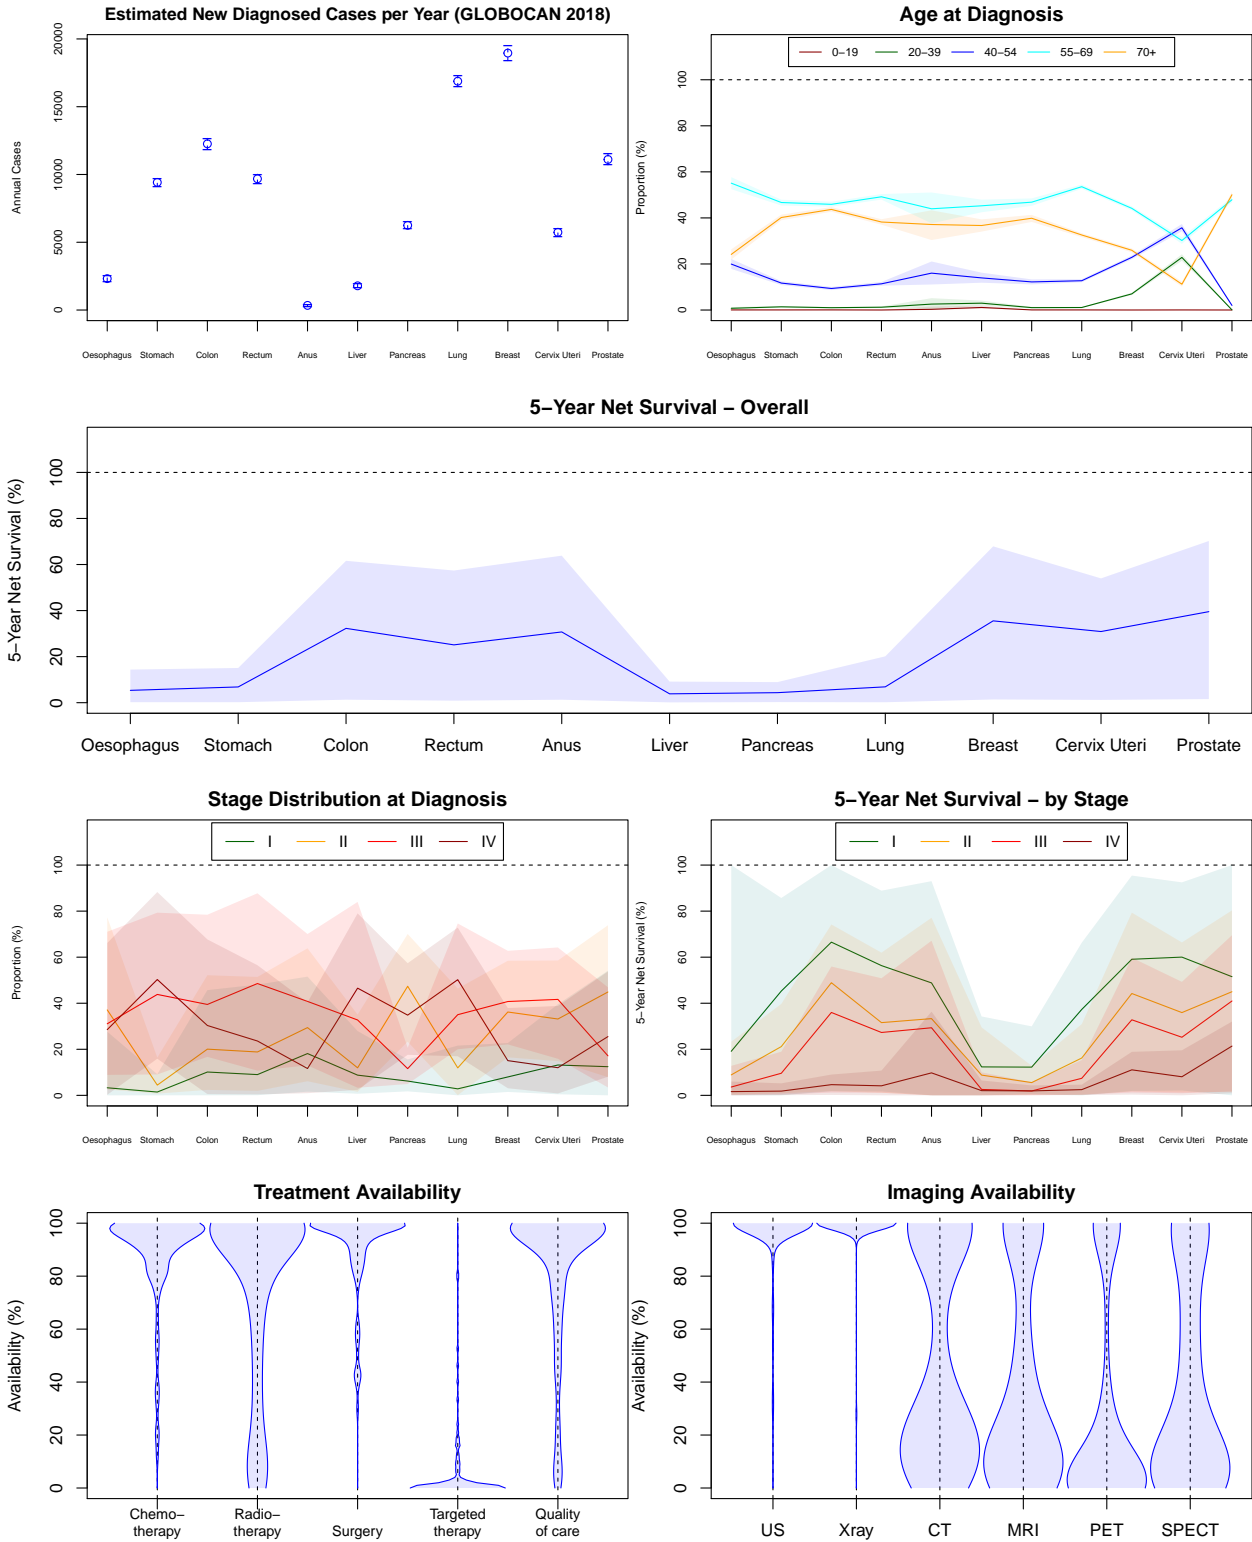

# United Arab Emirates

| ISO Code | Region       | Area | Income Group |
|----------|--------------|------|--------------|
| ARE      | Western Asia | Asia | High income  |

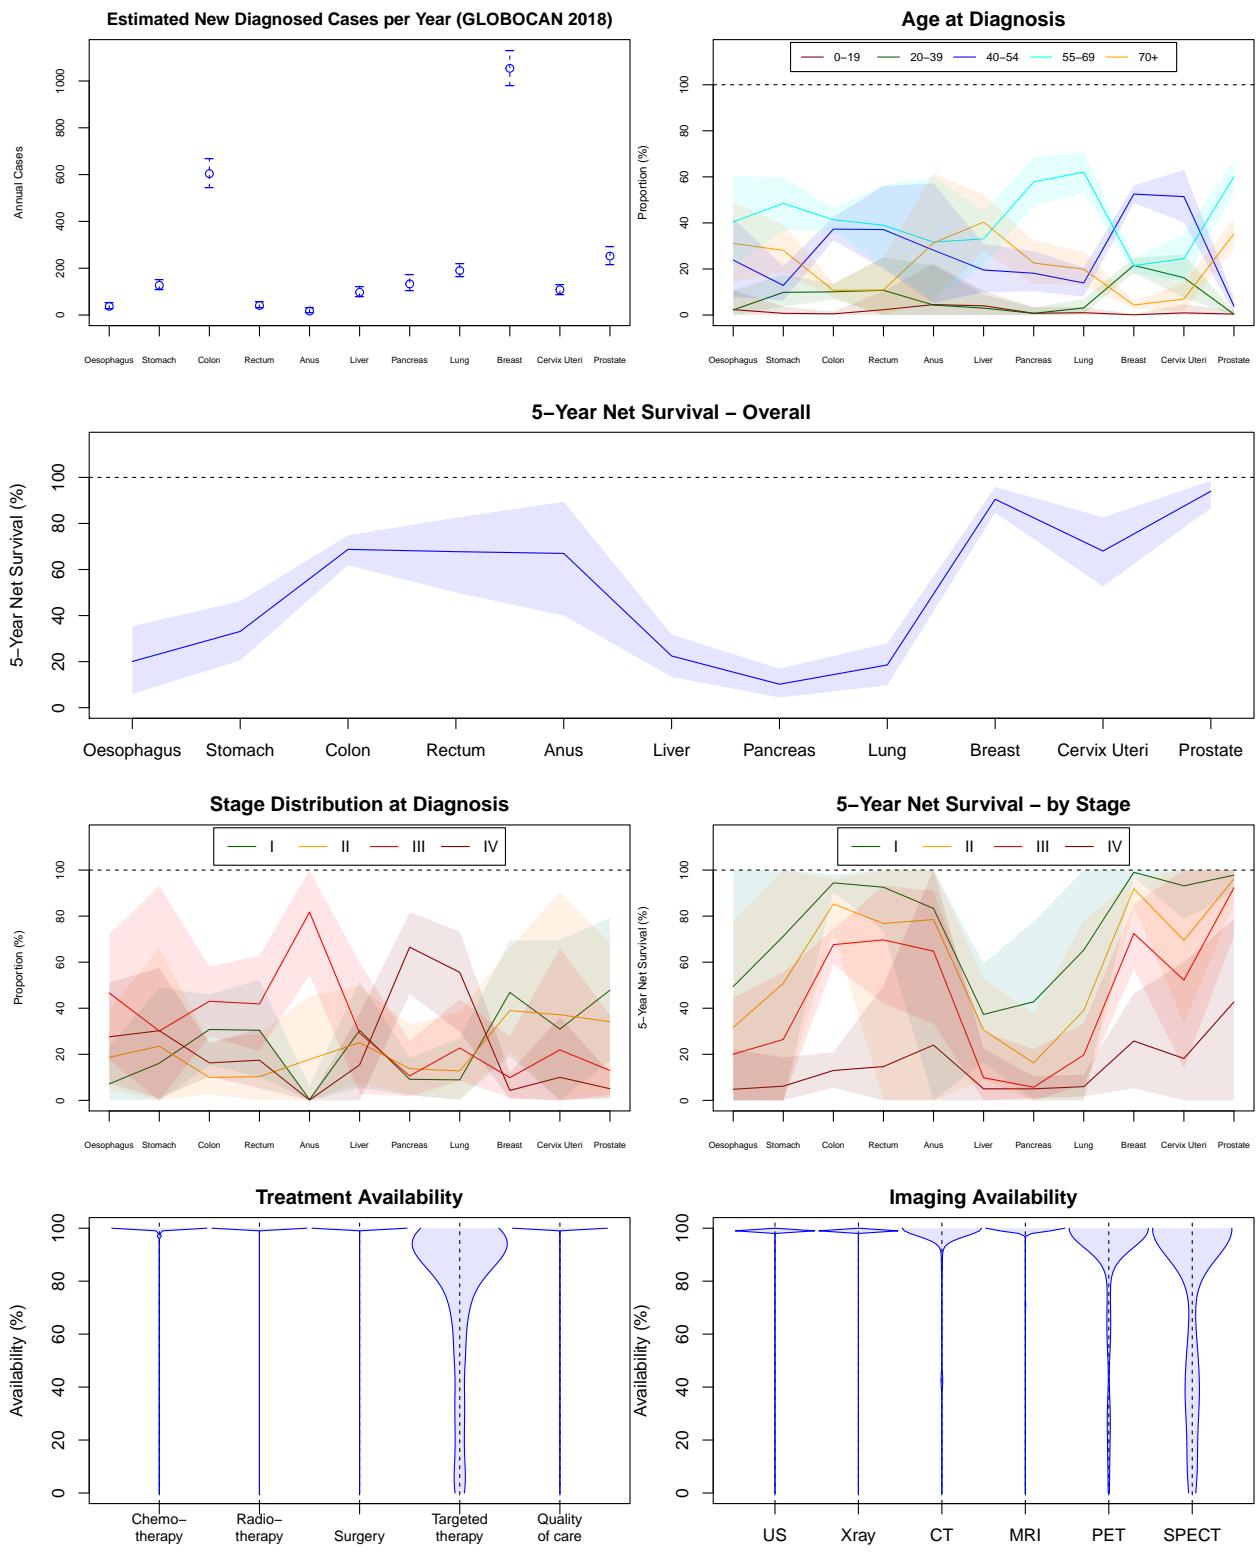

# United Kingdom

| ISO Code | Region          | Area   | Income Group |
|----------|-----------------|--------|--------------|
| GBR      | Northern Europe | Europe | High income  |

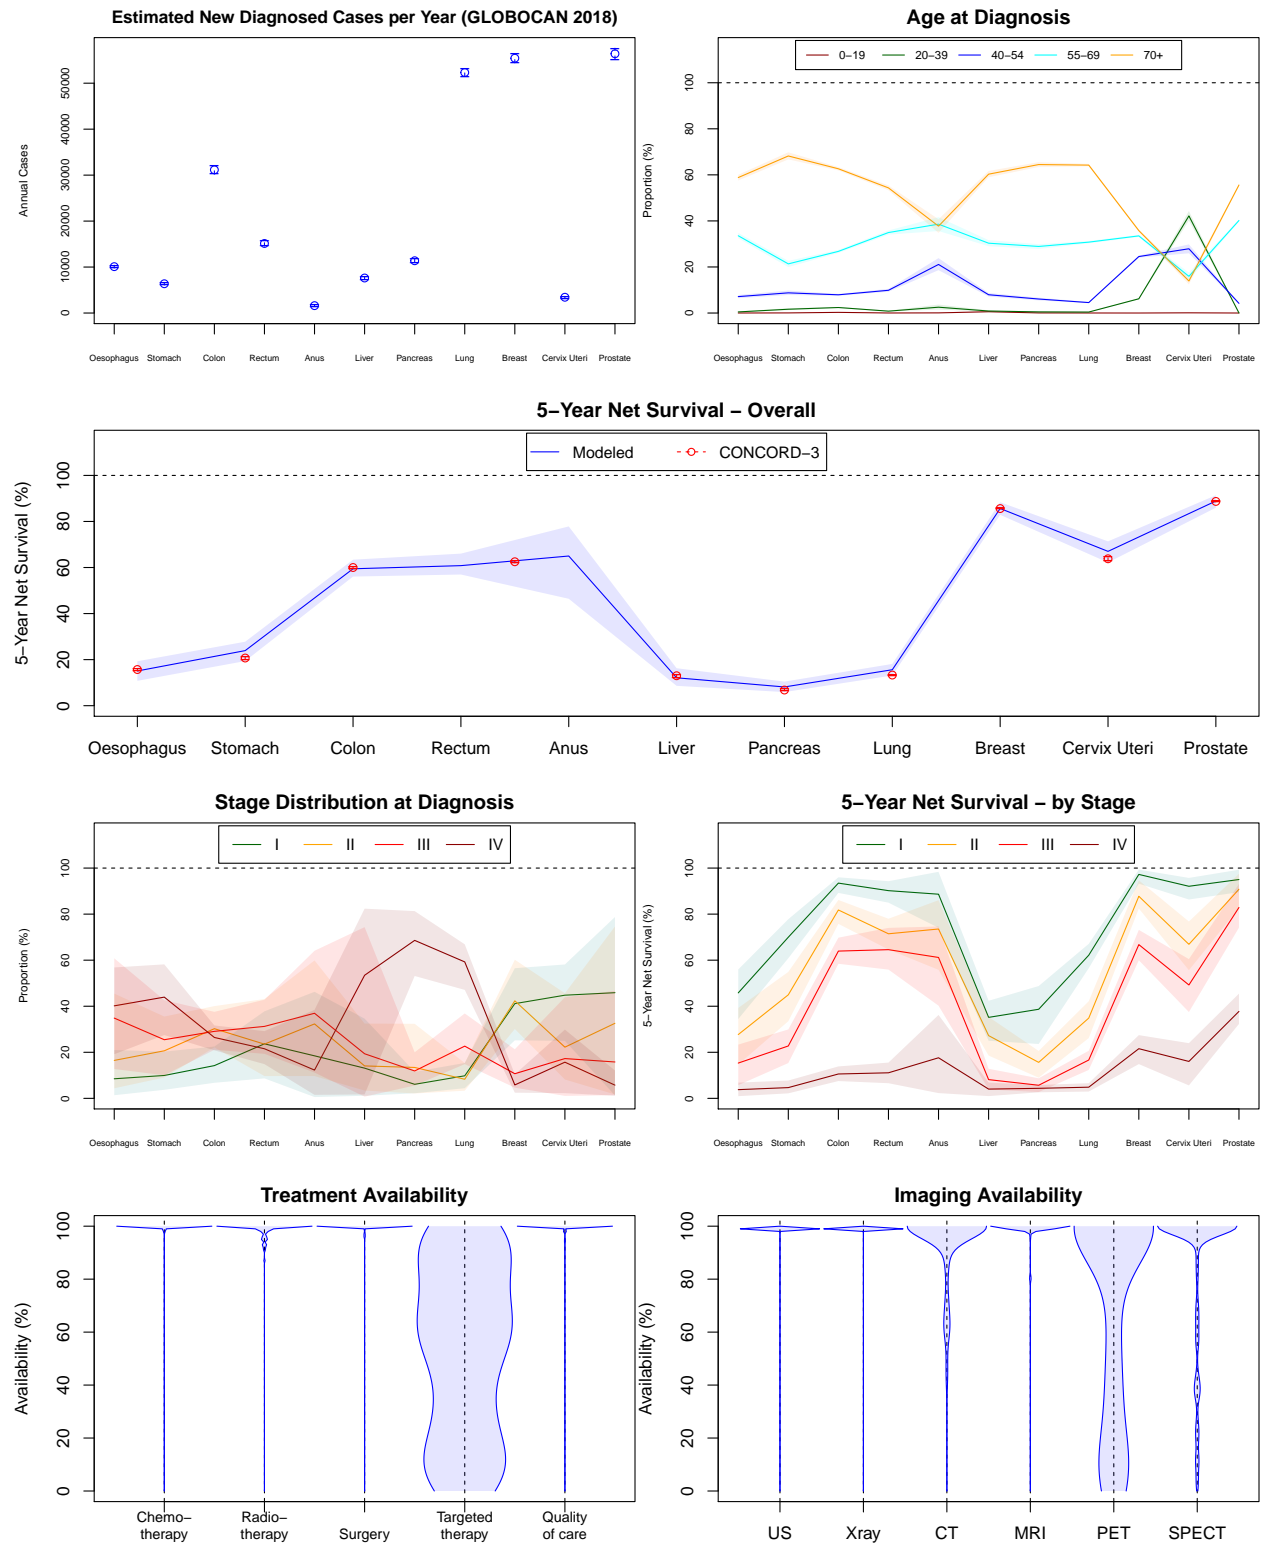

# United Republic of Tanzania

| ISO Code | Region         | Area   | Income Group |
|----------|----------------|--------|--------------|
| TZA      | Eastern Africa | Africa | Low income   |

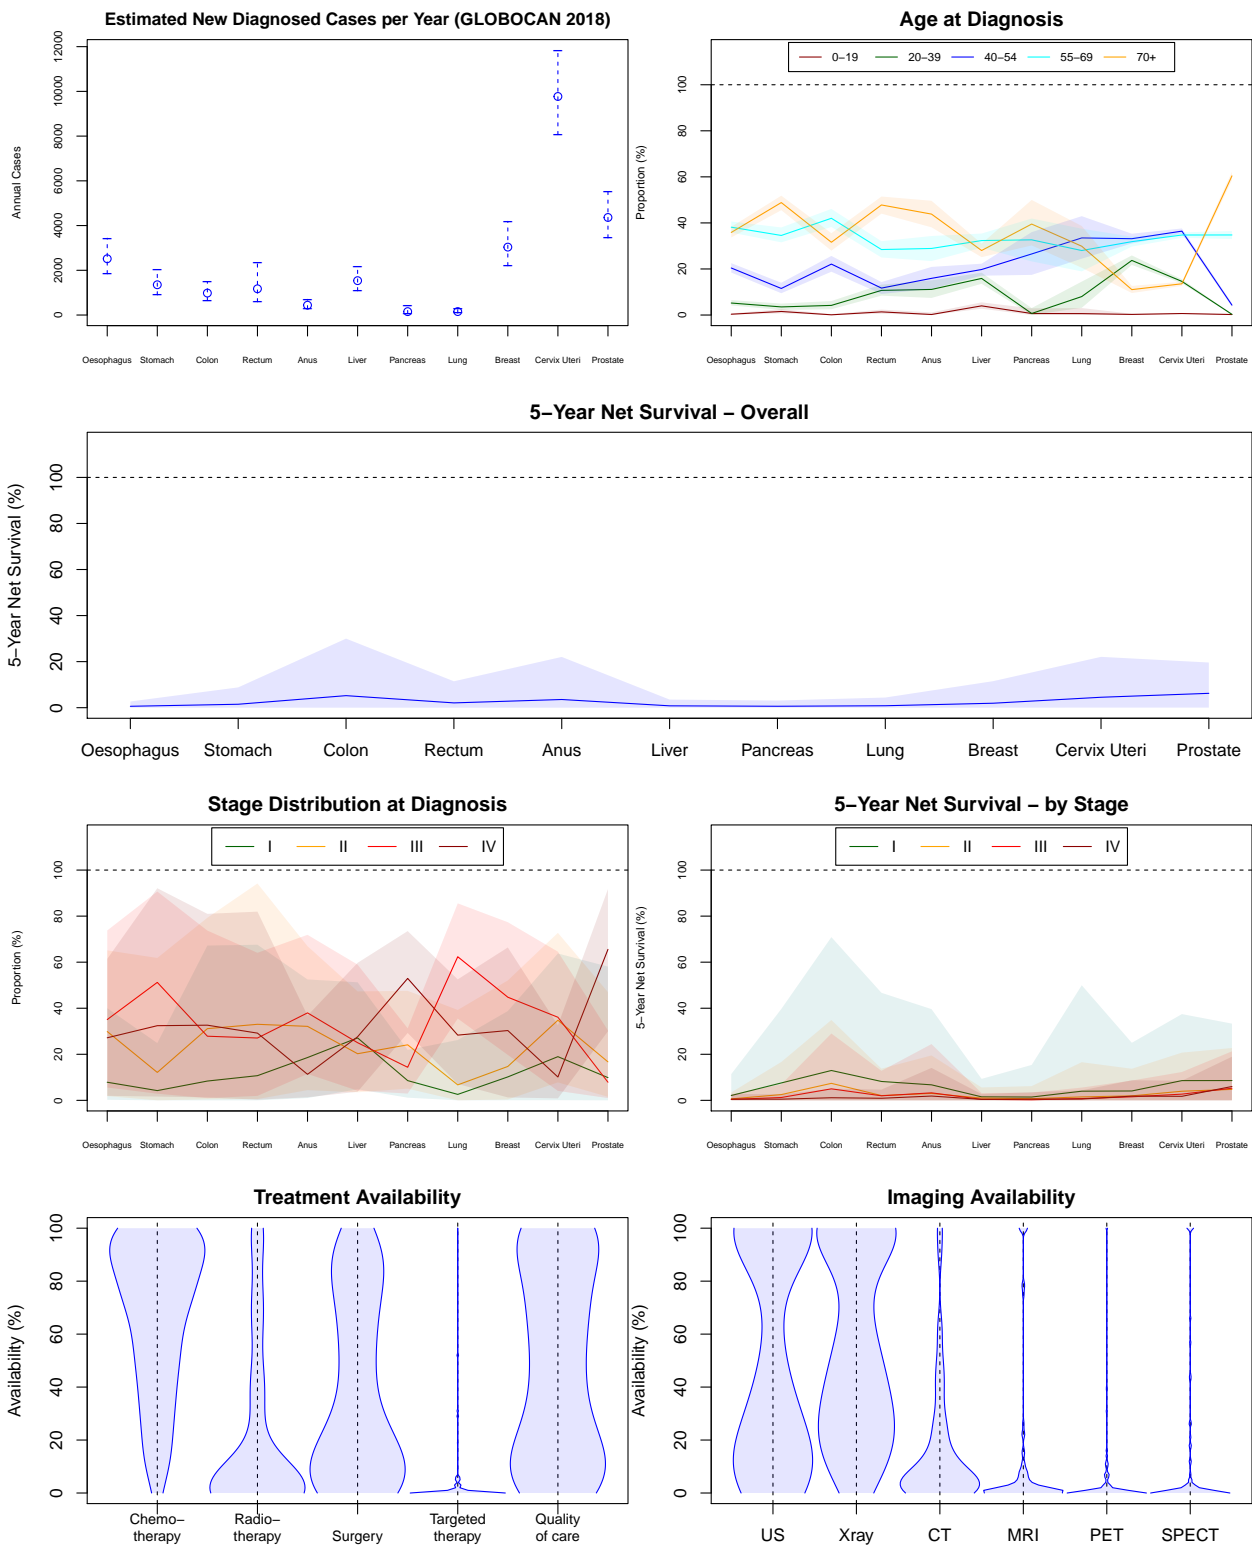

# United States of America

| ISO Code | Region           | Area             | Income Group |
|----------|------------------|------------------|--------------|
| USA      | Northern America | Northern America | High income  |

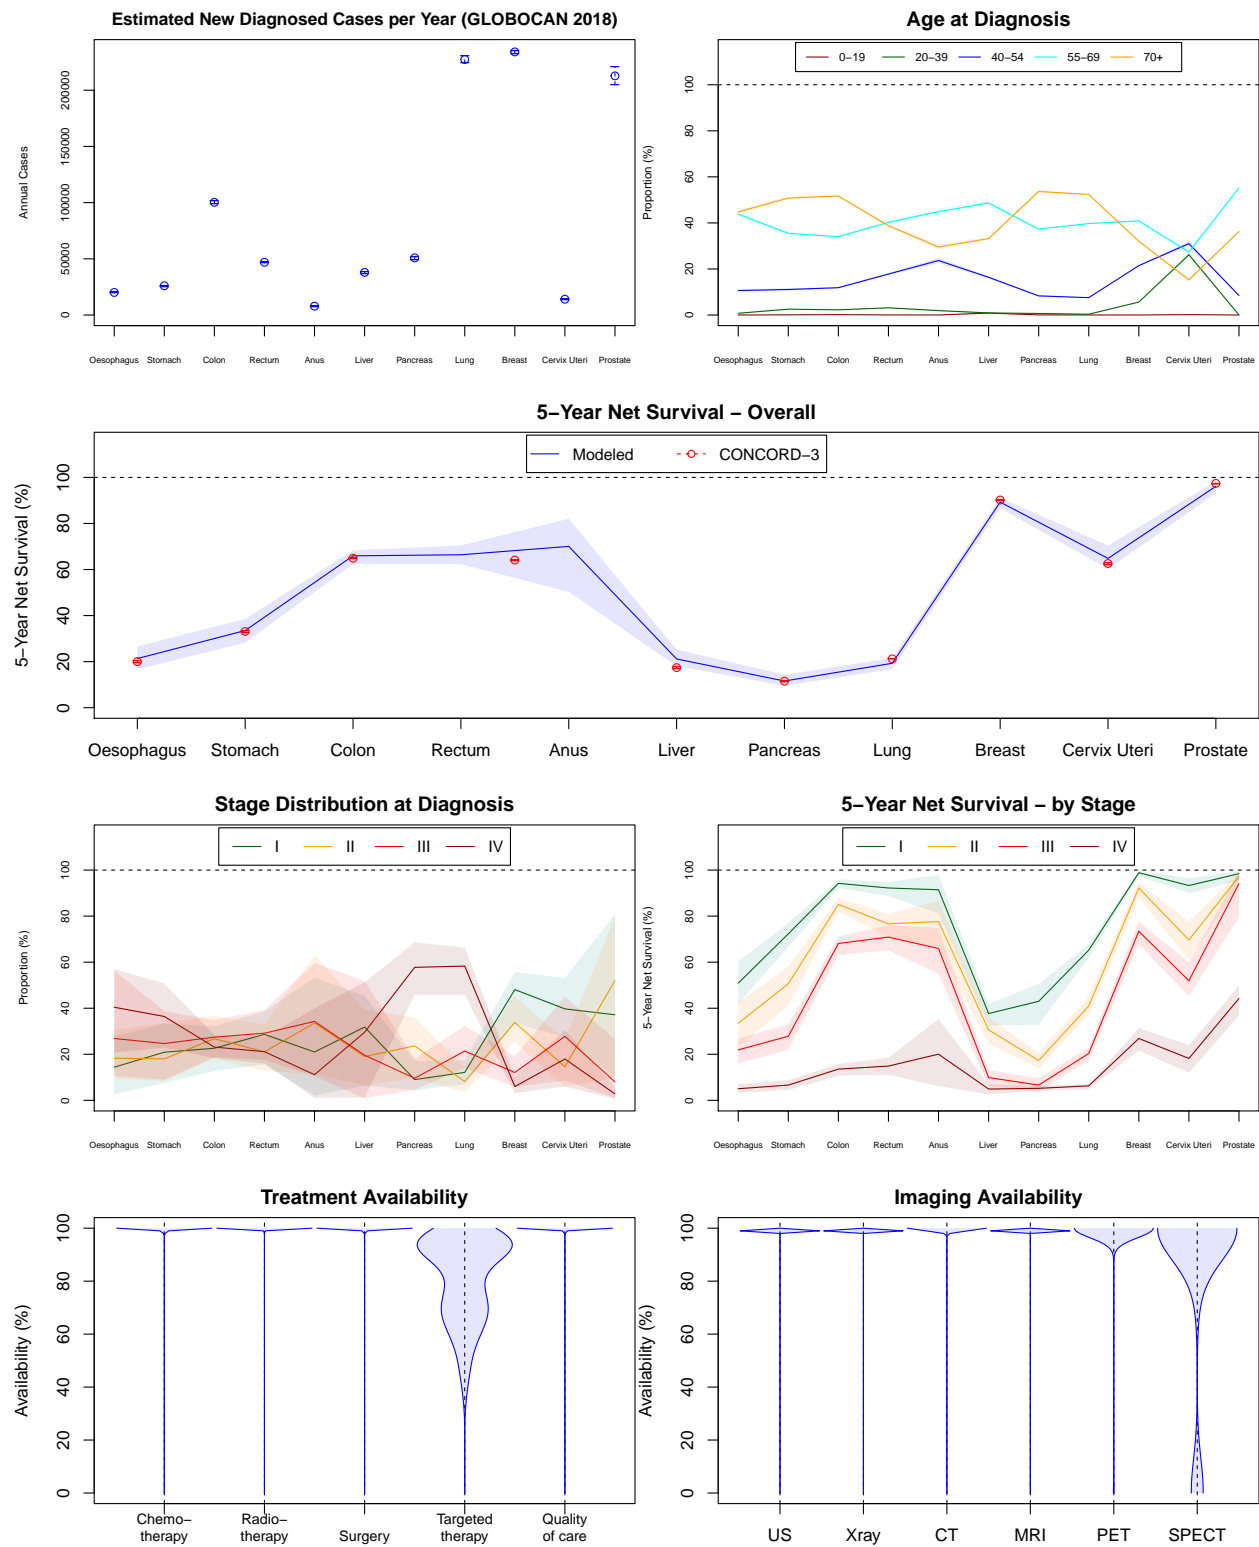

# Uruguay

| ISO Code | Region        | Area                            | Income Group |
|----------|---------------|---------------------------------|--------------|
| URY      | South America | Latin America and the Caribbean | High income  |

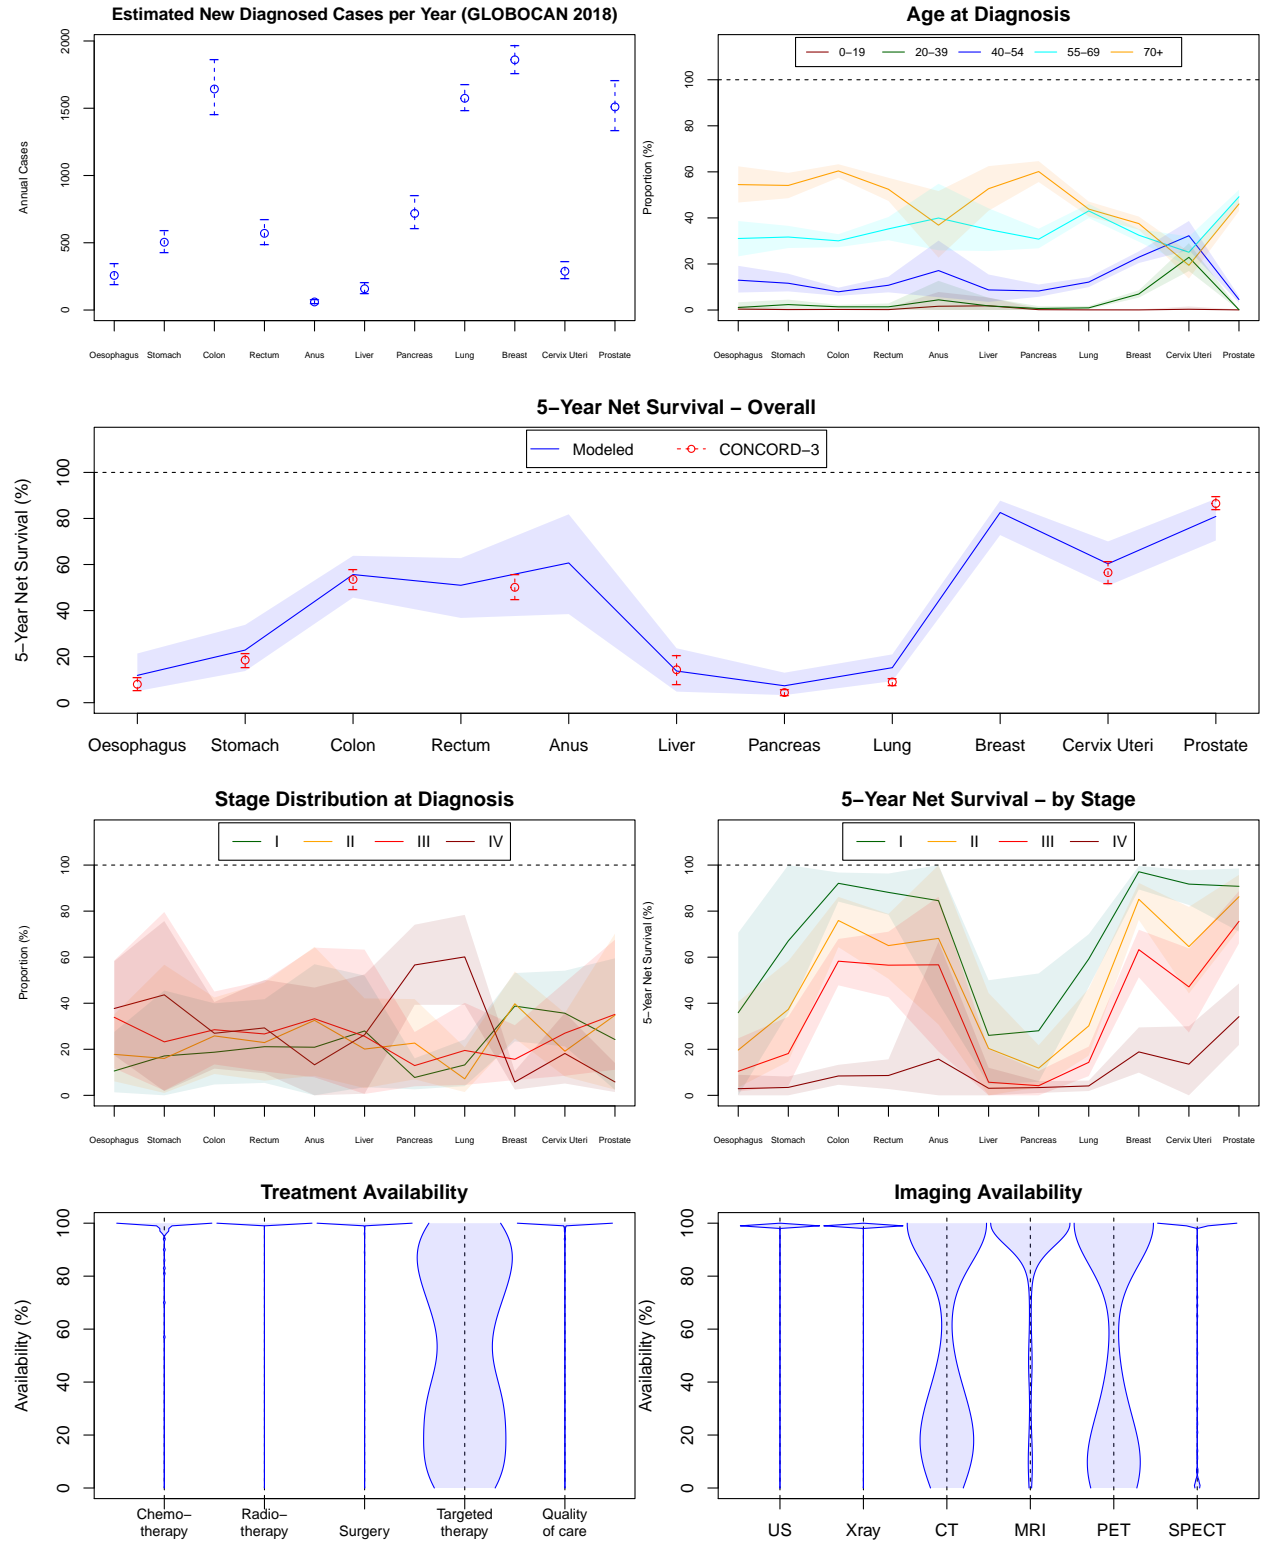

# Uzbekistan

| ISO Code | Region       | Area | Income Group        |
|----------|--------------|------|---------------------|
| UZB      | Central Asia | Asia | Lower middle income |

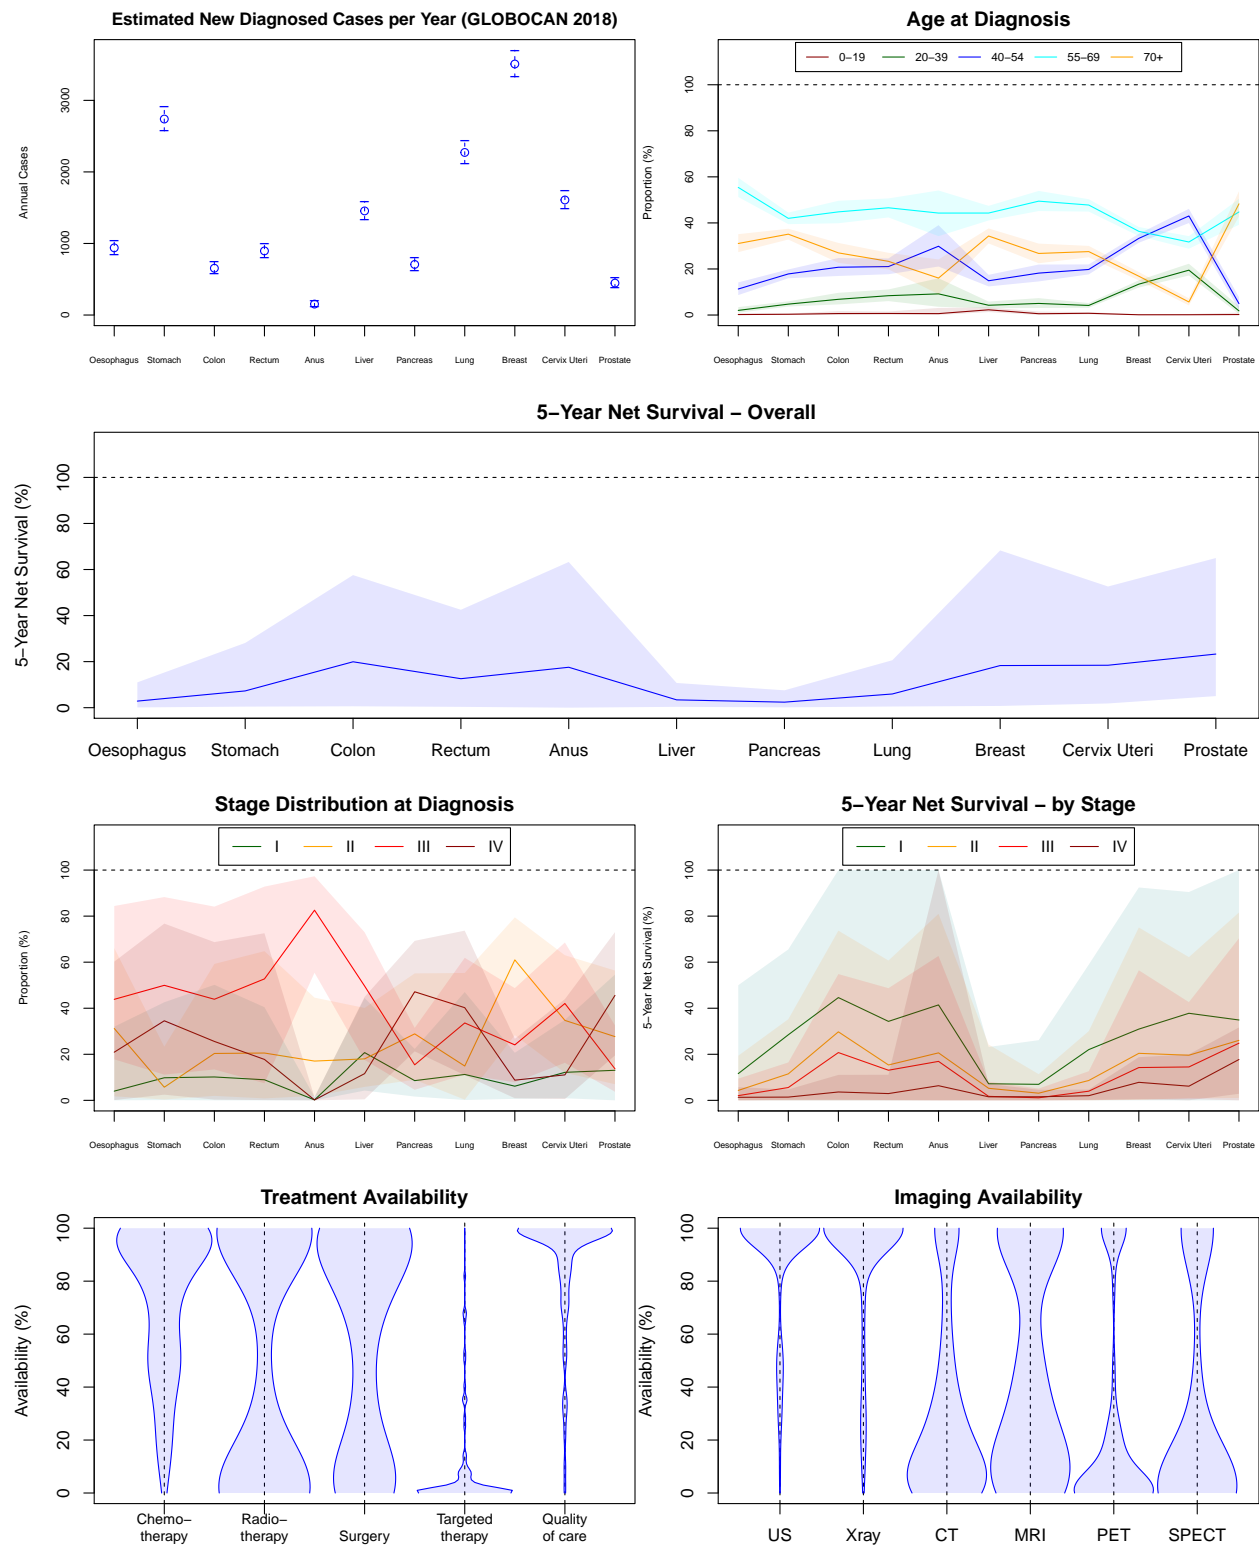



# Vanuatu

| ISO Code | Region    | Area    | Income Group        |
|----------|-----------|---------|---------------------|
| VUT      | Melanesia | Oceania | Lower middle income |

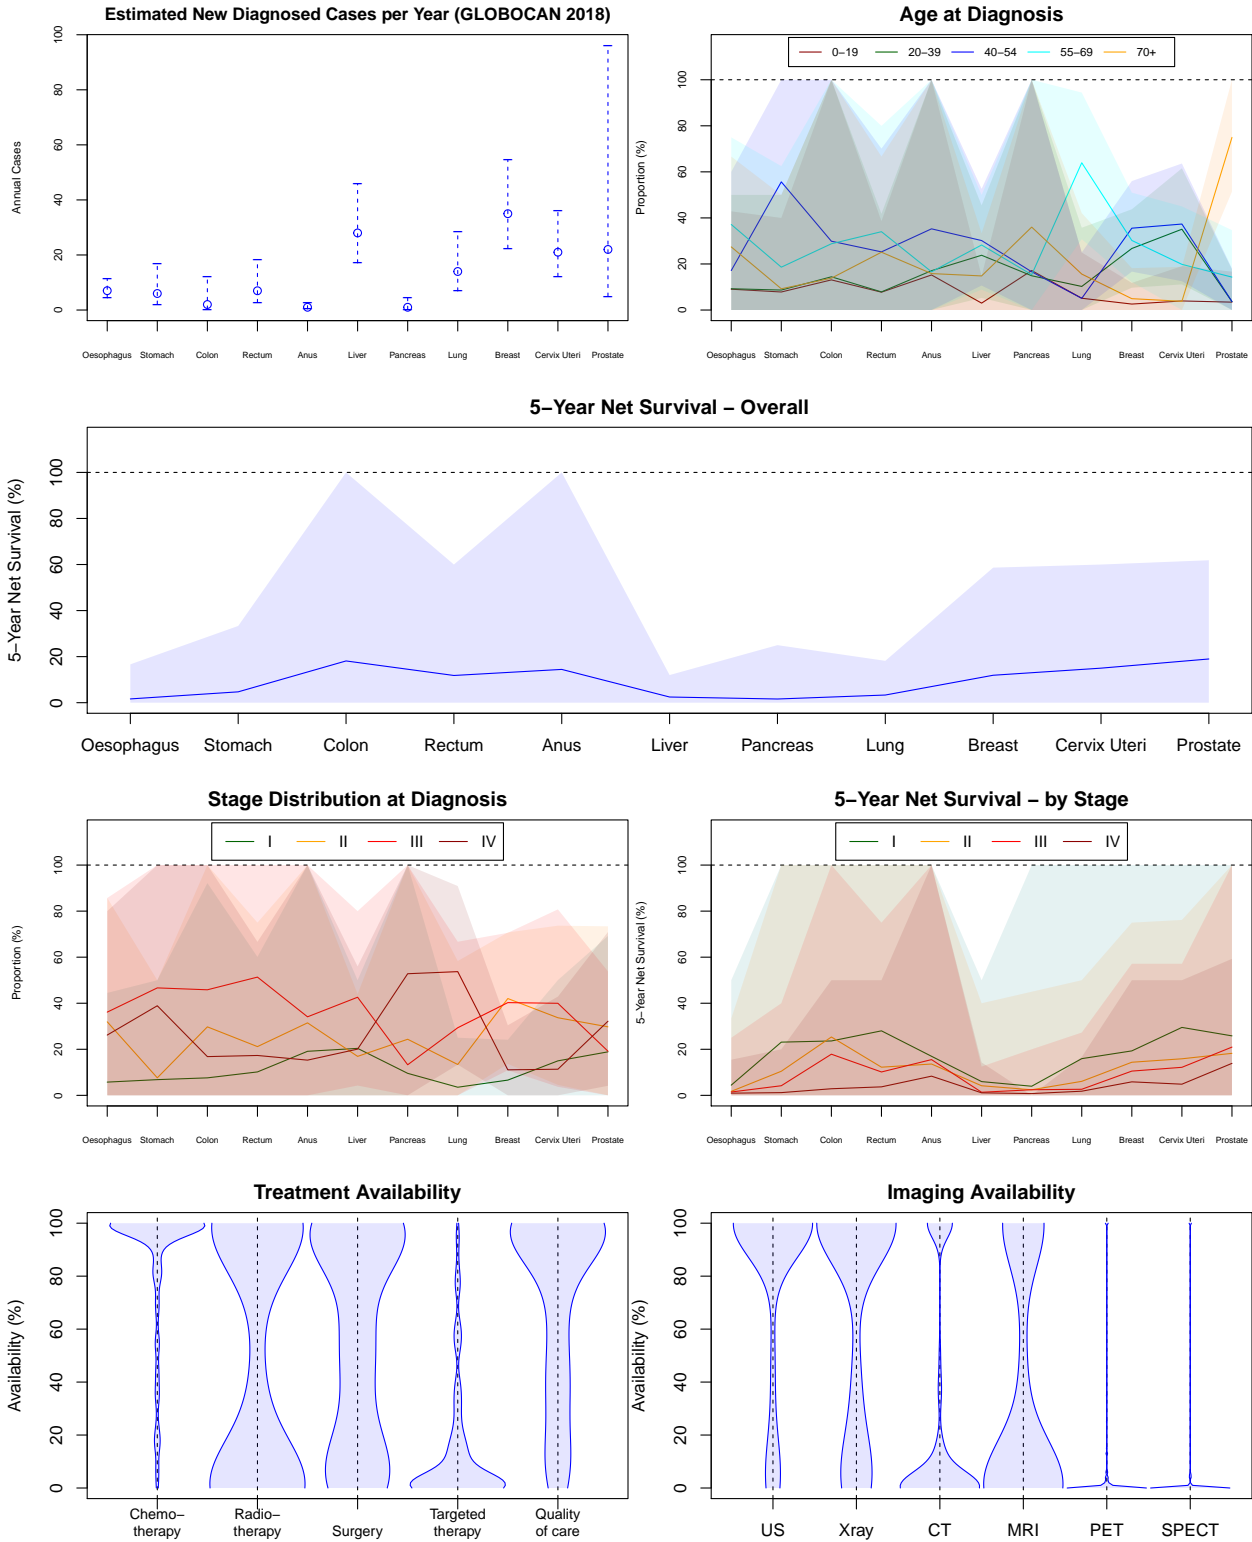

# Venezuela (Bolivarian Republic of)

| ISO Code | Region        | Area                            | Income Group        |
|----------|---------------|---------------------------------|---------------------|
| VEN      | South America | Latin America and the Caribbean | Upper middle income |

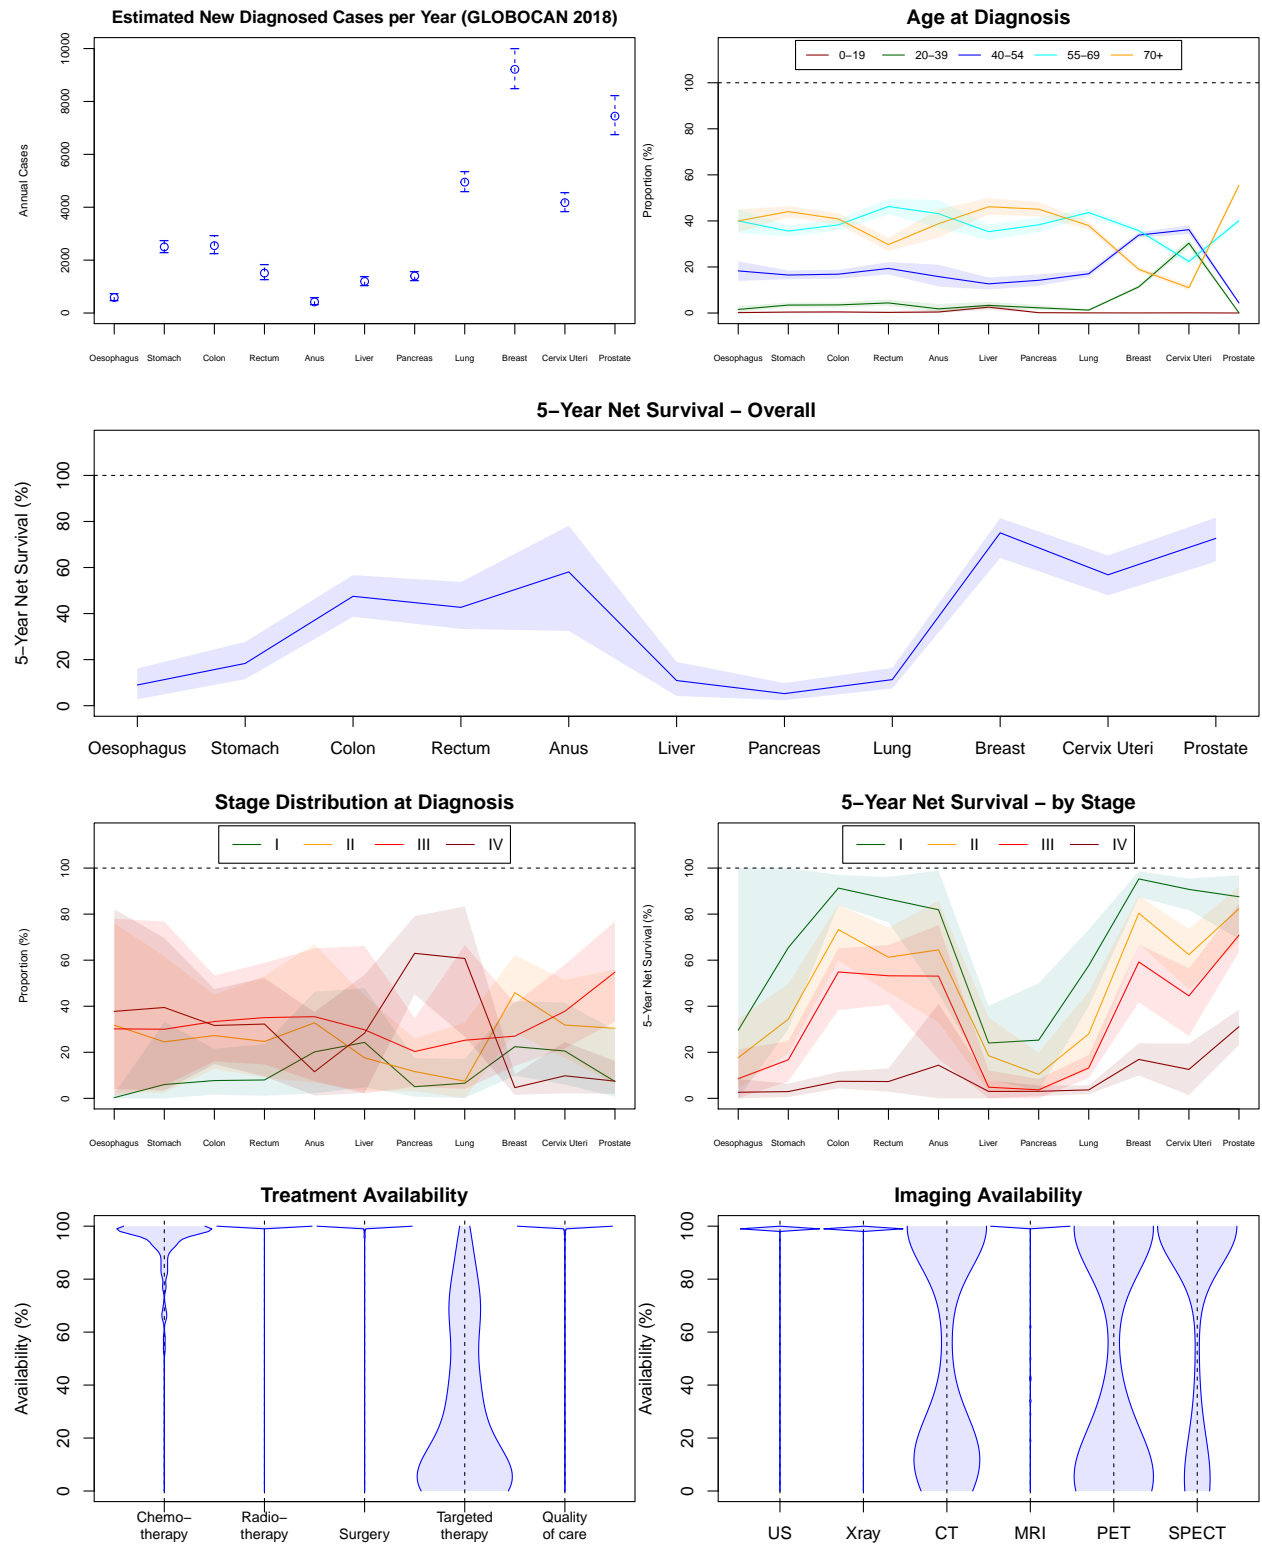

# Viet Nam

| ISO Code | Region             | Area | Income Group        |
|----------|--------------------|------|---------------------|
| VNM      | South-Eastern Asia | Asia | Lower middle income |

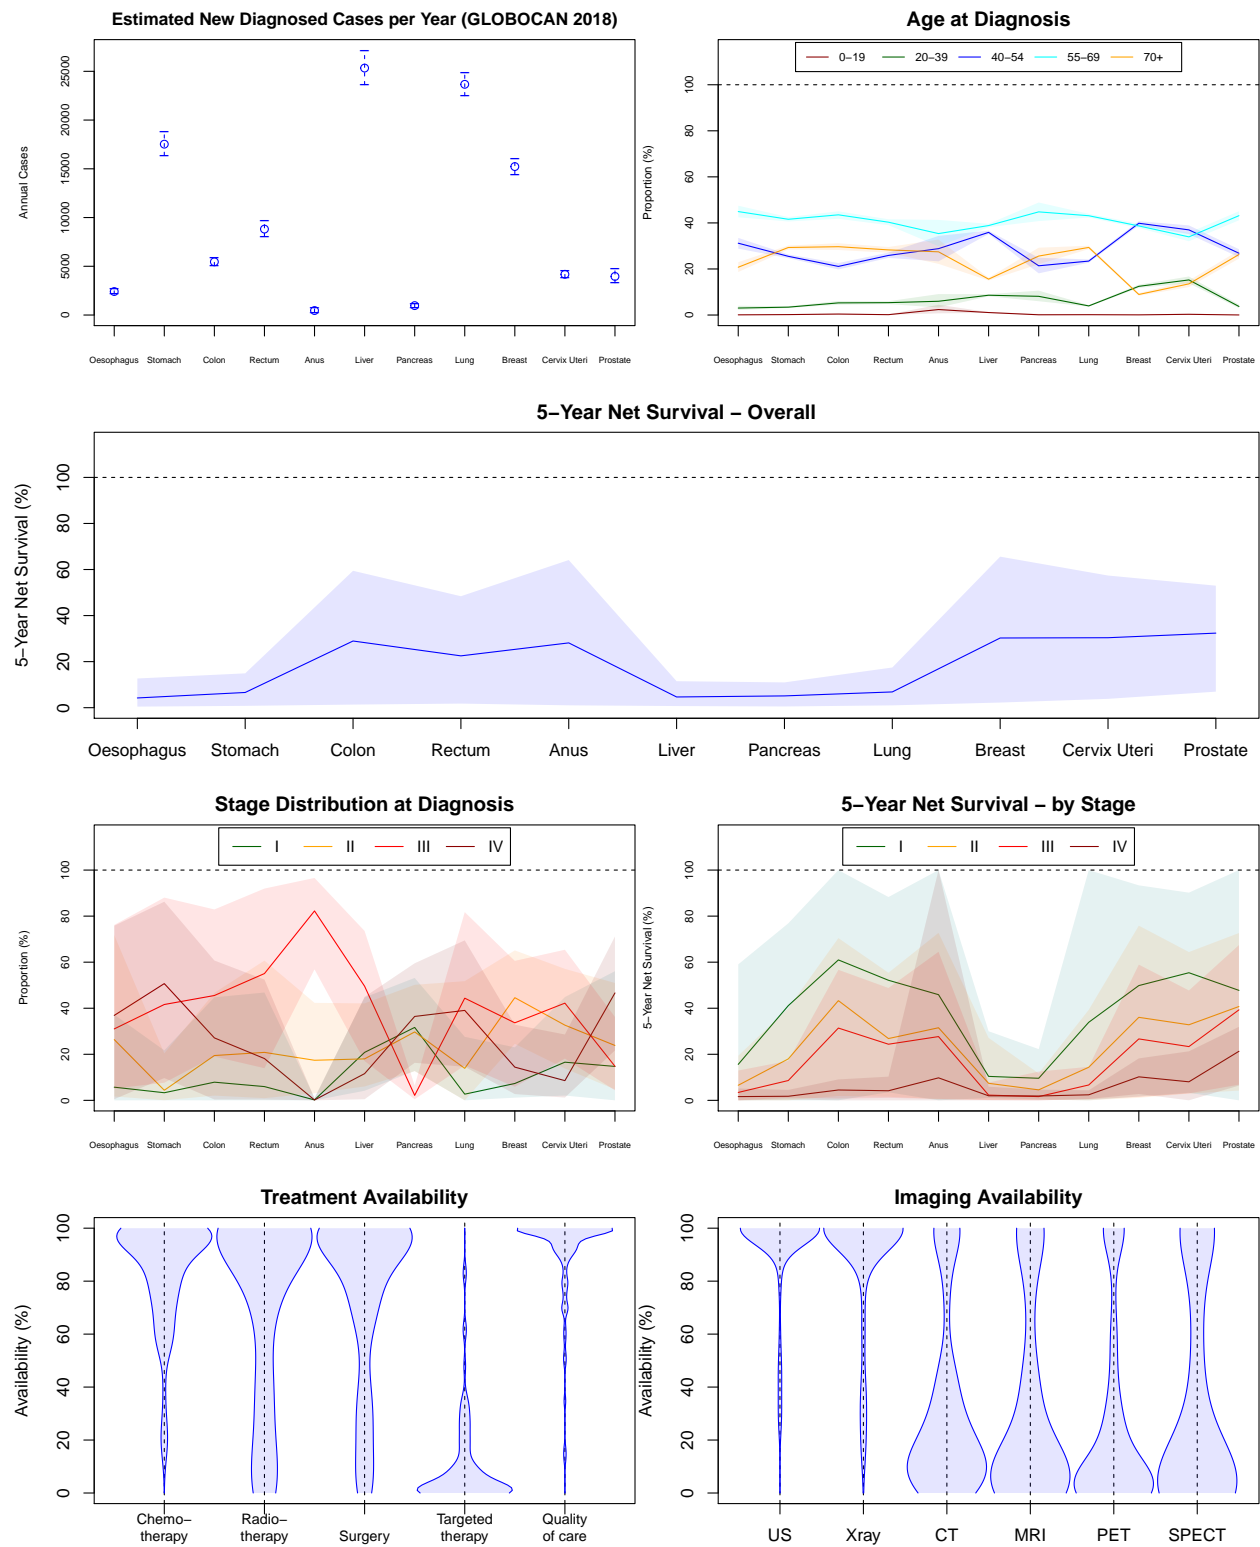

# Yemen

| ISO Code | Region       | Area | Income Group |
|----------|--------------|------|--------------|
| YEM      | Western Asia | Asia | Low income   |

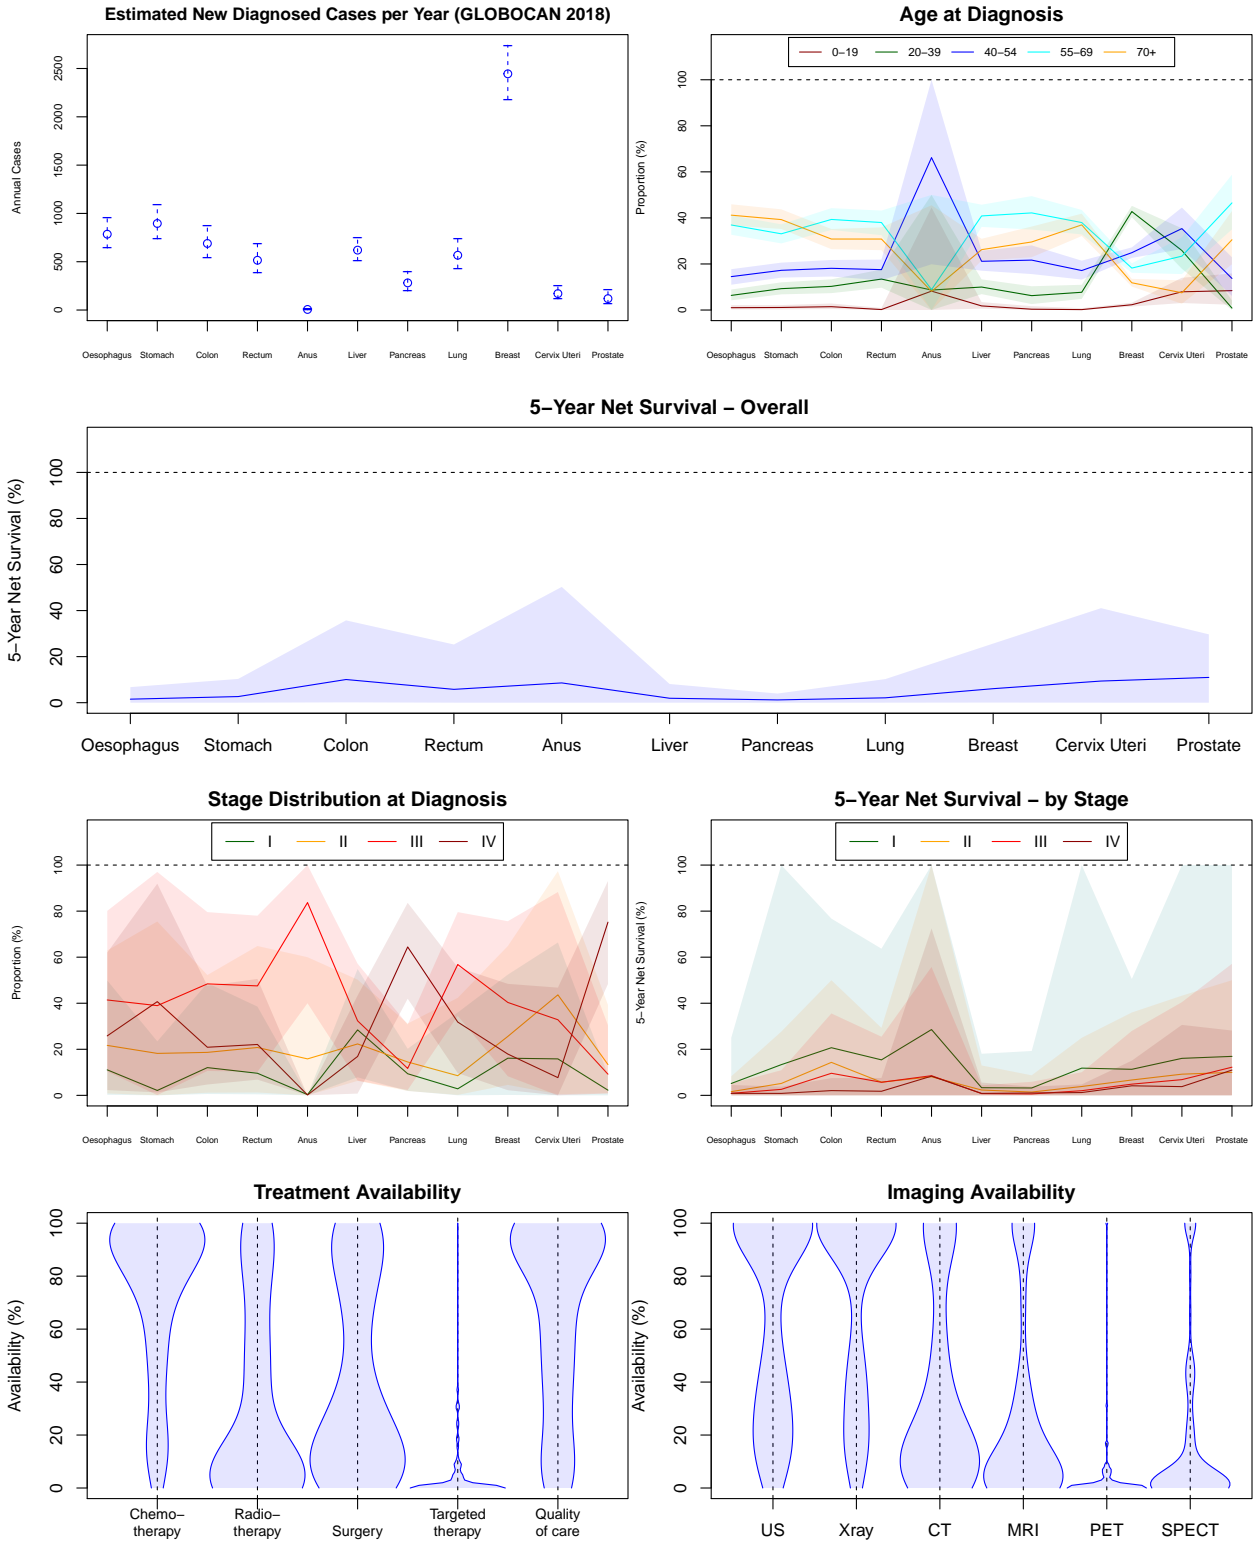

# Zambia

| ISO Code | Region         | Area   | Income Group        |
|----------|----------------|--------|---------------------|
| ZMB      | Eastern Africa | Africa | Lower middle income |

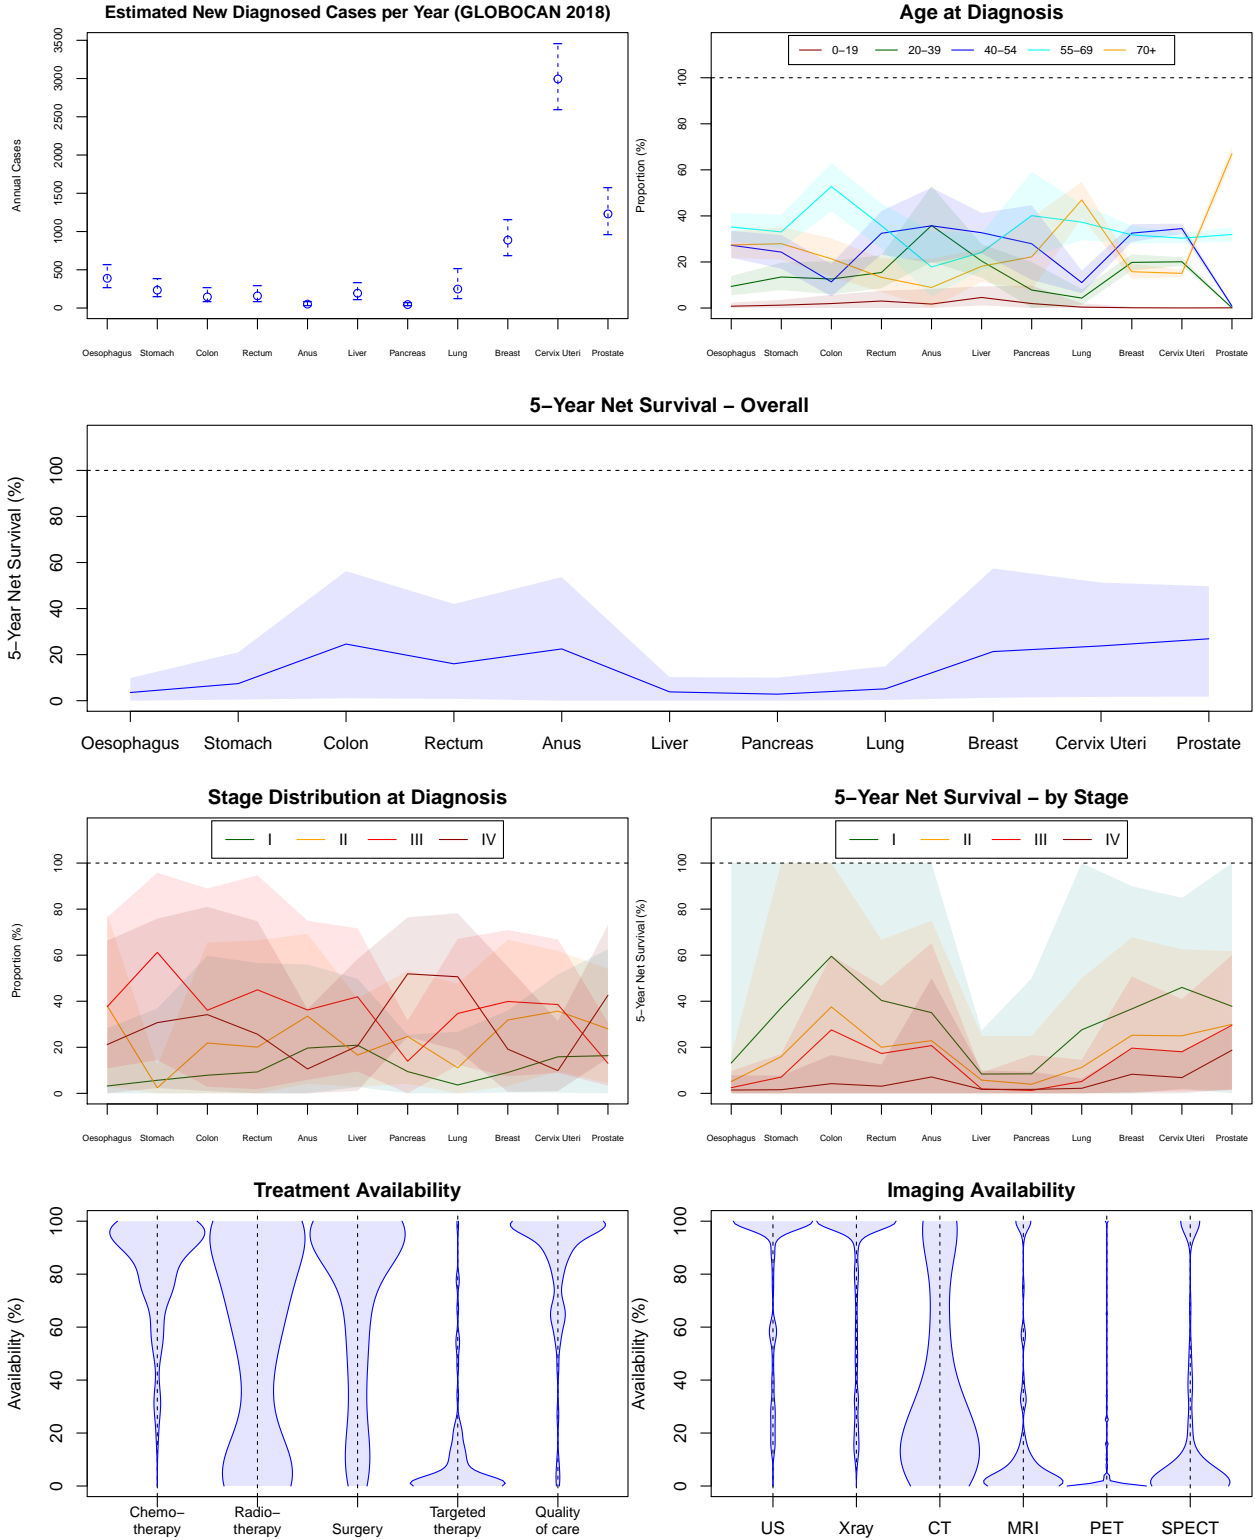

# Zimbabwe

| ISO Code | Region         | Area   | Income Group |
|----------|----------------|--------|--------------|
| ZWE      | Eastern Africa | Africa | Low income   |

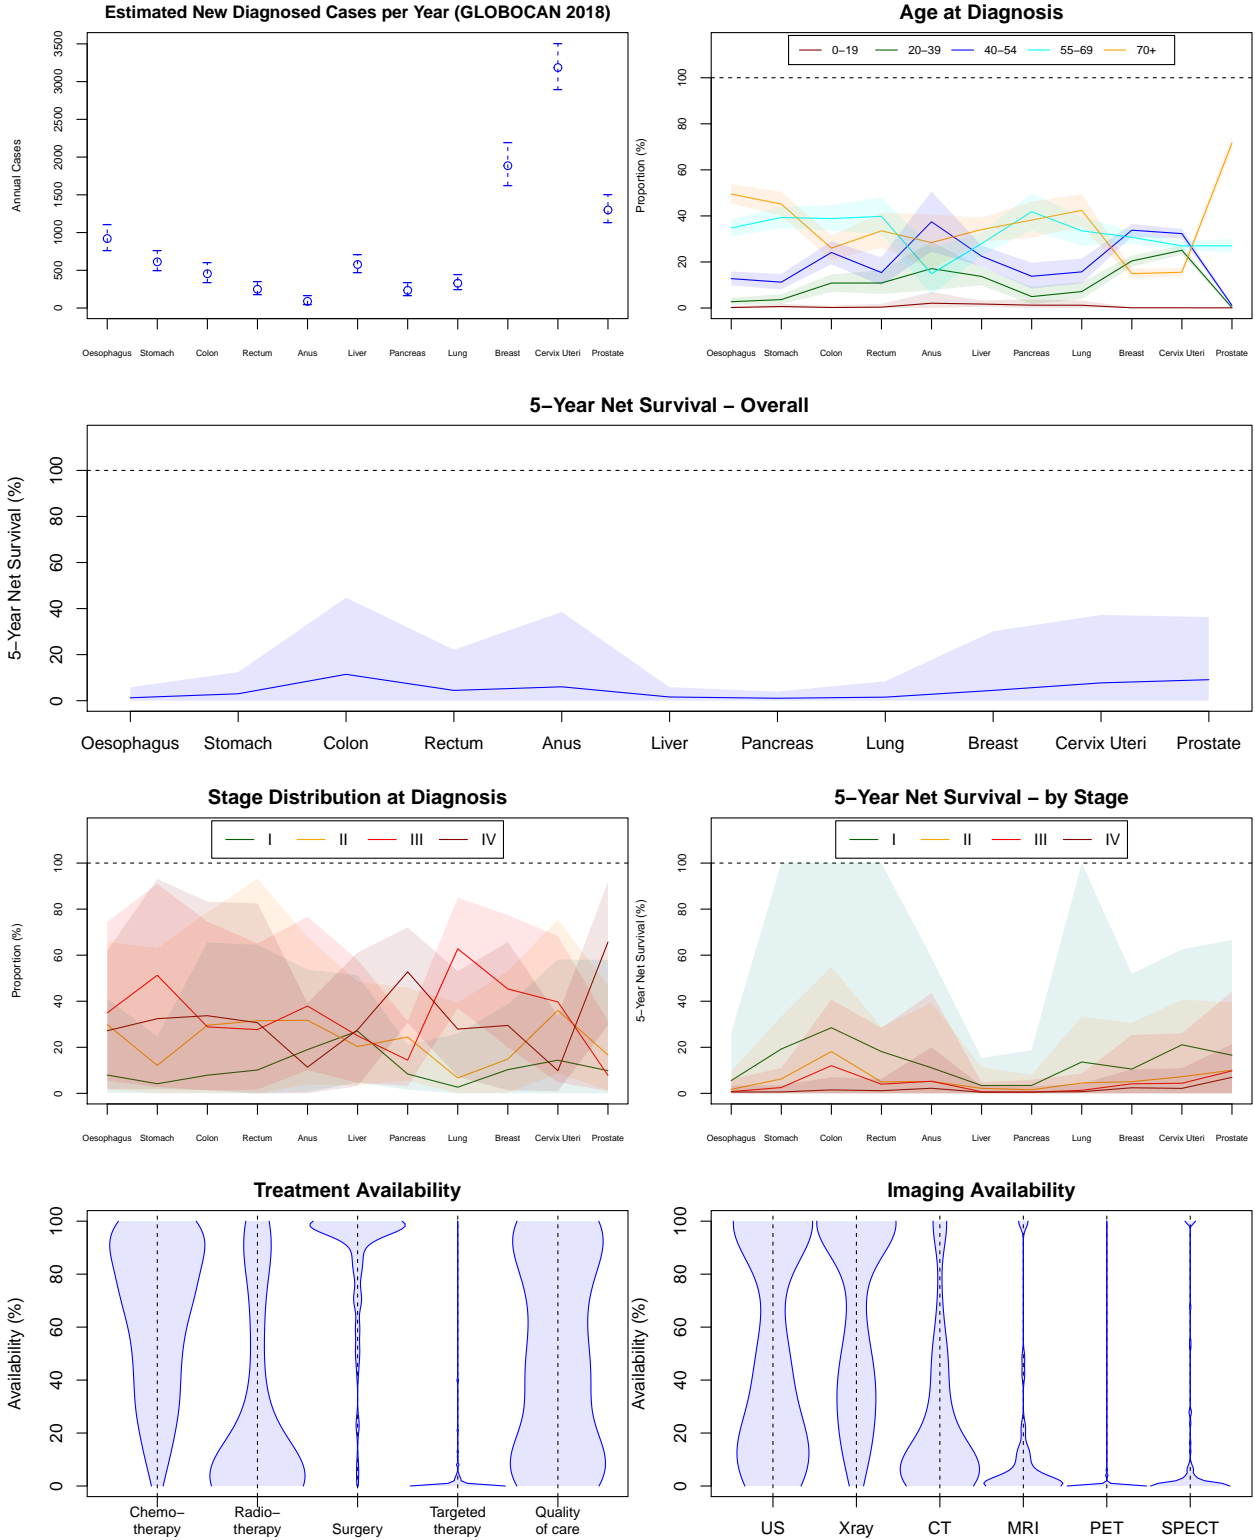

Supplement: NIHMS1674275-supplement-1.pdf [file NIHMS1674275-supplement-1.pdf]
